# Supplementary material for: Autism spectrum disorder–risk genes have convergent effects on transcription and neuronal firing patterns in primary neurons
Source: HighWire-hosted journal article supplement (doi:10.1101/gr.280698.125), 2025-10-20
Supplement: Supplemental_Table_S1.xlsx [file Supplemental_Table_S1.xlsx]

## Sheet: Legend
Supplemental Data Table 1. Differential gene expression by depletion.

## Sheet: shAsh1l
Gene	baseMean	log2FoldChange	lfcSE	stat	pvalue	padj	Luc_1.WTF	Luc_2.WTF	Luc_3.WTF	Luc_1.WTM	Luc_2.WTM	Luc_3.WTM	Ash1l_1.WTF	Ash1l_2.WTF	Ash1l_3.WTF	Ash1l_1.WTM	Ash1l_2.WTM	Ash1l_3.WTM
Ash1l	2553.61	-1.97707	0.104194	-18.9748	2.75535e-80	4.37659e-76	3443.04	4915.88	3831.46	3706.96	3960.77	4576.5	889.071	1272.22	1018.68	1018.32	953.564	1056.9
Dffa	1423.22	-1.09031	0.0585291	-18.6285	1.88906e-77	1.50029e-73	1869.53	2059.31	1835.37	2033.95	1905.8	1915.5	886.886	966.642	905.003	936.81	953.564	810.219
Rcn2	2658.74	-1.38155	0.0771285	-17.9123	9.44852e-72	5.00268e-68	4285.06	3484.8	3672.98	4133.74	3804.05	3677.16	1540.04	1642.99	1453.12	1584.54	1306.88	1319.53
Spock2	14450.5	-2.19784	0.128356	-17.1229	1.00078e-65	3.97408e-62	21804.2	25622.7	22331.3	23144.7	23524.1	25947.1	3969.14	7549.79	5231.75	5314.39	4499.42	4467.9
Snx30	1886.68	-1.58216	0.0926135	-17.0835	1.97059e-65	6.26017e-62	2702.34	3160.43	2815.43	2749.95	2786.62	2756.92	804.969	1187.68	1005.46	871.603	823.754	975.027
Clcn5	1292.16	-1.43887	0.089348	-16.1041	2.38725e-58	6.31984e-55	1686.66	2185.46	1907.3	1780	1940.16	1826.23	689.194	830.151	739.336	611.861	610.984	698.575
Blmh	1984.37	-1.50525	0.0951194	-15.8248	2.097e-56	4.75839e-53	2837.85	3120.04	2726.64	3086.2	2686.89	3151.98	883.61	1342.5	1046.88	1002.02	974.06	953.762
Zeb1	779.934	-1.04768	0.066694	-15.7087	1.31759e-55	2.61608e-52	1009.1	1072.53	1034.01	1051.07	1142.3	996.213	494.778	576.522	492.597	530.352	468.486	491.235
Slc27a4	5927.05	-0.75976	0.0501462	-15.1509	7.47319e-52	1.31893e-48	7538.65	7336.23	7530.29	7102.37	7652.52	7556.6	4154.82	4911.64	4508.27	4335.19	4171.48	4326.48
Srxn1	1280.25	-1.35756	0.0945332	-14.3607	9.13189e-47	1.45051e-43	1705.08	1969.21	1788.16	1821.15	1836.24	1930.7	614.922	929.973	755.198	697.717	685.161	629.461
Uhmk1	22800.3	0.983462	0.0688336	14.2875	2.61758e-46	3.77979e-43	14180	18392.8	14335.7	14545.7	14635.4	15798.9	30522.2	29649.1	29455.4	29901.9	29649.3	32537.4
Gad1	19090.7	-1.31513	0.0940586	-13.9821	2.00556e-44	2.65469e-41	28196.9	29105.7	23413.6	27648.8	24125.8	30921.5	11532.8	12303.6	9734.74	12264.4	10685.4	9154.83
Xxylt1	979.077	-0.965663	0.0698837	-13.8181	1.98121e-43	2.42073e-40	1290.65	1276.97	1322.86	1256.82	1292.32	1329.55	652.058	717.087	668.839	721.627	540.711	679.435
1500011B03Rik	1579.93	-0.934337	0.0683883	-13.6622	1.70663e-42	1.80721e-39	2147.13	2005.87	1990.47	2357.27	2096.04	1852.82	1070.38	1162.21	1149.98	1093.31	1026.76	1006.93
2610524H06Rik	1579.93	-0.934337	0.0683883	-13.6622	1.70663e-42	1.80721e-39	2147.13	2005.87	1990.47	2357.27	2096.04	1852.82	1070.38	1162.21	1149.98	1093.31	1026.76	1006.93
Mrpl18	529.689	-1.11924	0.0823258	-13.5953	4.27124e-42	4.24027e-39	807.806	631.341	764.269	733.633	699.798	719.857	345.143	324.93	354.247	357.553	333.796	283.896
Papola	3844.13	-0.814724	0.0601461	-13.5458	8.39506e-42	7.84394e-39	4602.13	5232.18	4724.98	5135.43	4672.3	5039.95	2821.22	2974.28	2745.85	2951.71	2779.68	2449.8
Kcnc2	1882.34	-1.14643	0.0851222	-13.4681	2.41038e-41	2.12703e-38	2443.15	2791.94	2568.17	2399.59	2487.43	2867.08	1146.84	1375.1	1201.97	1266.11	995.532	1045.2
Tmem260	456.165	-1.01435	0.075636	-13.4109	5.22087e-41	4.36465e-38	574.937	617.049	588.936	576.09	650.351	653.379	299.269	314.744	342.791	283.651	277.187	295.592
Taf9b	1105.98	-1.32693	0.0991048	-13.3892	6.99449e-41	5.55502e-38	1706.39	1539.2	1544.27	1896.39	1495.14	1309.61	601.816	700.79	623.897	708.585	624.648	521.007
Mbtps2	1896.25	-0.904411	0.0685587	-13.1918	9.78634e-40	7.4022e-37	2457.63	2551.46	2437.79	2443.09	2563.69	2375.15	1295.38	1471.86	1295.38	1431.3	1099.97	1332.29
Dstyk	2235.69	0.634365	0.048483	13.0843	4.05041e-39	2.9244e-36	1678.76	1854.87	1818.51	1623.63	1718.9	1810.09	2720.73	2631.02	2803.13	2626.76	2722.1	2819.82
Txn2	3071.02	-0.981948	0.075118	-13.0721	4.75444e-39	3.28345e-36	3975.88	4126.71	4004.54	4254.84	3853.5	4250.76	1953.99	2443.6	2055.86	2112.71	2099.4	1720.39
Xylt2	1250.25	-1.09503	0.0843638	-12.9798	1.59237e-38	1.05388e-35	1645.87	1793.98	1631.94	1763.54	1702.14	1680.93	692.47	997.2	725.236	792.268	837.418	740.042
Fam168a	8072.04	-1.36981	0.105971	-12.9262	3.20119e-38	2.03391e-35	11065.9	12936.3	11077.4	10710.6	11951	12098	3555.19	5773.37	4601.68	4597.11	3743.01	4754.99
Scn3b	10904.1	0.849282	0.0658369	12.8998	4.51422e-38	2.75784e-35	7937.29	7546.89	8131.59	7222.29	8379.14	7488.22	14273.2	12046.9	14769.1	13537	14103.4	15414.4
Gnai2	2922.91	-1.28633	0.0997412	-12.8967	4.69916e-38	2.7645e-35	4232.43	3706.02	4495.7	3616.43	4472.84	4353.33	1442.83	1907.82	1846.14	1705.17	1367.39	1928.79
Ehd1	2639.05	-0.909683	0.0705619	-12.892	4.99486e-38	2.83351e-35	3333.84	3385.38	3730.31	3343.67	3545.08	3330.52	1568.43	2070.79	1904.3	1920.35	1861.26	1674.66
Tmed8	3132.18	0.748315	0.058713	12.7453	3.31066e-37	1.81333e-34	2168.18	2616.71	2211.88	2351.39	2323.16	2344.76	3969.14	3628.22	3877.33	3864.61	3985.06	4245.67
Panx2	1528.43	-1.44985	0.115174	-12.5884	2.44653e-36	1.29535e-33	2094.51	2143.2	2442.29	2267.91	2219.24	2259.29	658.611	1137.77	729.643	883.558	802.282	702.828
Ahcyl2	2480.68	-1.29267	0.102843	-12.5693	3.11482e-36	1.596e-33	3154.92	3916.68	3378.52	3417.74	3523.29	3747.43	1155.57	1863	1535.07	1428.04	1316.64	1331.23
Galnt9	795.461	-1.00866	0.0809405	-12.4617	1.20758e-35	5.99415e-33	1155.14	961.925	1120.55	1004.04	1156.55	980.069	525.36	511.332	556.044	502.096	468.486	603.943
Alkbh8	1108.06	-1.05679	0.0848645	-12.4526	1.35301e-35	6.51005e-33	1434.05	1694.55	1421.76	1446.1	1429.77	1550.83	688.101	814.872	726.118	793.355	582.679	714.524
Snx17	1606.62	-0.923761	0.074196	-12.4503	1.39349e-35	6.51005e-33	2022.15	2233.31	1964.62	2159.75	1998.82	2245.04	1064.92	1334.35	1117.38	1070.49	1052.14	1016.5
Cacng7	4411.3	-0.909786	0.0731015	-12.4455	1.47923e-35	6.71318e-33	6428.24	4943.85	5916.34	5966.65	5716.55	5580.31	3121.58	3069.01	2911.52	3159.29	3402.38	2719.87
Kcna3	430.797	-1.14862	0.0929624	-12.3557	4.53724e-35	2.00193e-32	564.412	597.785	573.201	601.955	548.105	676.171	261.042	321.874	229.115	238.006	277.187	280.706
Actg1	15489.1	-1.50282	0.122148	-12.3033	8.69813e-35	3.73408e-32	22189.7	23647.9	22703.3	21006.1	24293.5	23549.2	6203.83	11152.5	8720.46	7675.98	6336.27	8390.34
Agpat4	1954.69	-0.973099	0.079496	-12.2409	1.88045e-34	7.86027e-32	2541.83	2575.08	2619.87	2630.03	2494.13	2680.94	1162.13	1570.67	1441.66	1354.14	1251.25	1134.52
Maea	3300.11	-0.80803	0.0669643	-12.0666	1.58564e-33	6.45804e-31	4028.51	4377.13	4238.32	4078.48	4179.51	4302.05	2218.31	2861.22	2443.6	2381.15	2228.24	2264.78
Trp53inp2	7409.76	-1.99895	0.166156	-12.0305	2.45597e-33	9.75264e-31	9633.15	14265.4	10192.9	12356.5	11143.1	13532	2024.98	4404.38	2820.76	3182.11	3251.1	2110.61
Ankrd29	601.05	-1.77518	0.14836	-11.9654	5.39349e-33	2.08952e-30	953.843	970.625	797.986	830.04	1040.9	987.666	243.566	350.395	269.65	366.247	216.675	185.011
Hdgf	3319.59	-0.854476	0.07161	-11.9324	8.02644e-33	3.03552e-30	4335.05	4117.39	4300.13	4052.62	4526.48	4318.19	2132.02	2643.24	2507.04	2345.29	2017.42	2540.17
Uprt	359.108	-1.33598	0.112786	-11.8453	2.27539e-32	8.4052e-30	485.473	558.637	514.757	540.819	474.354	511.877	178.033	283.168	188.579	199.969	173.73	199.897
Gnb2	12675.6	-0.663622	0.0560943	-11.8305	2.71593e-32	9.80452e-30	15998.2	14981.9	16217.1	14945.4	15625.2	15476.9	8922.38	11054.8	9428.96	9712.62	9534.66	10208.5
Sec22b	2060.4	-0.810018	0.0685018	-11.8248	2.90687e-32	1.02606e-29	2448.42	2771.44	2505.23	2719.38	2598.05	2699.94	1378.39	1741.79	1507.75	1486.72	1342.99	1524.74
Aqp11	616.882	-0.825456	0.0703743	-11.7295	8.99719e-32	3.10677e-29	809.122	769.291	718.188	858.257	799.53	778.737	434.705	476.7	459.992	473.839	390.405	433.818
Npepps	5704.44	-1.14055	0.0977556	-11.6674	1.87139e-31	6.32449e-29	7167.63	8759.23	7365.08	7867.74	7818.46	8113.11	3046.21	4486.89	3738.98	3692.9	2933.89	3463.1
Slc17a6	2589.69	0.950242	0.0815538	11.6517	2.24869e-31	7.44129e-29	1590.62	1997.8	1644.3	1892.87	1635.1	1832.88	3245	3507.01	3290.44	3089.74	3317.47	4033.02
Nrxn3	6105.04	-0.983489	0.0847893	-11.5992	4.15873e-31	1.34811e-28	8671.42	7787.99	7213.35	7834.82	8189.73	8955.47	3886.13	4848.49	3701.97	4611.24	3746.91	3812.92
Bpnt1	1480.51	-0.926753	0.0799511	-11.5915	4.55088e-31	1.44572e-28	1995.83	2077.96	1689.26	1942.25	1844.62	2091.19	972.08	1199.9	1018.68	1061.79	973.084	899.534
Agpat1	3917.08	-0.803381	0.0697007	-11.5262	9.73984e-31	3.03348e-28	4750.79	5101.68	5020.57	4893.24	4914.51	5200.44	2461.87	3389.87	2742.33	2828.91	2801.16	2899.56
Arhgef6	266.808	-1.79072	0.155616	-11.5073	1.21277e-30	3.70456e-28	371.012	490.283	351.788	389.155	389.708	490.984	129.975	152.789	110.151	124.981	131.762	69.1132
Steap2	315.651	-1.14059	0.0998386	-11.4243	3.16197e-30	9.47637e-28	438.11	428.765	396.745	435.007	451.726	452.997	228.275	216.96	163.905	219.531	159.09	196.707
Nxph1	5106.64	-0.841633	0.0738838	-11.3913	4.6207e-30	1.35917e-27	7211.05	6277.99	6123.14	6576.83	6710.52	6433.12	4152.64	4009.17	3585.65	3704.86	3267.69	3227.05
Kmt5a	1045.56	-1.06466	0.0941116	-11.3128	1.1343e-29	3.27584e-27	1199.87	1477.06	1409.4	1399.08	1454.07	1547.03	572.326	788.389	691.75	750.97	570.967	685.815
Maneal	1820.74	-0.883129	0.0781887	-11.2948	1.39156e-29	3.94705e-27	2169.5	2428.43	2325.4	2365.5	2412	2466.32	1043.07	1488.16	1352.66	1242.2	1229.78	1325.91
Cstf2	3303.96	-0.439461	0.0392038	-11.2097	3.65636e-29	1.01891e-26	3724.59	3822.22	3835.95	3758.69	3837.57	3837.65	2792.82	2900.94	2784.63	2970.19	2712.34	2669.89
Cpt1c	2814.81	0.560066	0.0501166	11.1753	5.38938e-29	1.47595e-26	2504.99	2186.7	2205.14	2269.09	2225.94	2266.88	3386.99	3213.65	3276.34	3261.45	3613.2	3367.41
Gga3	1725.35	-0.758945	0.0687192	-11.0441	2.33979e-28	6.2992e-26	1868.22	2480	2159.06	2242.05	2136.27	2124.43	1220.01	1321.11	1312.12	1253.07	1357.63	1230.21
Arl2bp	4808	0.523597	0.0474523	11.0342	2.61494e-28	6.92262e-26	3965.35	4017.34	3862.93	3898.6	3881.15	4042.78	6204.93	5280.37	5746.38	5365.47	5775.06	5655.58
Chfr	2189.14	-0.637909	0.0584178	-10.9198	9.27427e-28	2.41496e-25	2758.91	2453.9	2822.17	2728.79	2818.47	2415.03	1690.76	1785.59	1795.91	1712.78	1656.29	1631.07
Cdc37	3358.4	-0.683751	0.062702	-10.9048	1.09372e-27	2.80205e-25	4427.15	3953.34	4196.73	4046.74	4129.23	4088.37	2389.79	2882.61	2491.18	2560.47	2800.18	2334.96
Mtdh	2637.16	-0.624673	0.05747	-10.8695	1.61012e-27	4.05955e-25	3207.54	3388.49	2955.92	3275.48	2976.03	3389.4	2030.45	2196.08	1934.26	2212.7	2035.96	2043.62
Ints2	997.392	-0.556472	0.0515287	-10.7993	3.46967e-27	8.6113e-25	1174.87	1170.09	1222.83	1114.56	1170.8	1269.72	844.29	801.63	798.377	823.785	786.666	791.08
Epha5	9162.93	-0.952825	0.0885765	-10.7571	5.48791e-27	1.34108e-24	11810.5	13040	11304.4	12873.8	12007.2	11462.6	5631.51	7525.34	6111.2	7051.07	5226.55	5910.77
Lman2l	1663.88	-0.779213	0.0727585	-10.7096	9.17836e-27	2.20892e-24	1969.52	2263.76	1997.21	2099.79	2214.21	2068.4	1114.07	1433.16	1246.03	1187.86	1101.92	1270.62
Cbfb	1025.59	1.07447	0.100467	10.6947	1.07776e-26	2.5551e-24	701.239	687.267	646.257	718.349	582.467	627.738	1507.27	1168.32	1305.07	1476.94	1184.88	1701.25
Lztr1	7155.99	0.590422	0.0558202	10.5772	3.80068e-26	8.87795e-24	5538.87	5824.99	6053.46	5532.82	5820.48	5499.59	8614.37	7928.71	9104.67	8079.18	9489.77	8385.02
Nars	7465.24	-1.28875	0.121973	-10.5659	4.29031e-26	9.87641e-24	9192.41	11973.1	9866.93	11040.9	10450	11041	3388.08	5873.19	4309.12	4879.67	3971.39	3597.07
Rgs12	1809.45	-0.733084	0.069492	-10.5492	5.12443e-26	1.16281e-23	2303.69	2341.43	2328.77	2326.7	2017.26	2242.19	1241.86	1540.11	1392.31	1244.37	1451.33	1283.38
Pabpc4	1328.57	-0.895144	0.0850443	-10.5256	6.58235e-26	1.47259e-23	1578.77	1831.88	1665.66	1814.1	1695.44	1780.65	742.713	1085.82	882.973	1008.54	905.739	950.572
Tmem250-ps	937.61	0.569056	0.0541751	10.504	8.27923e-26	1.82649e-23	709.133	767.427	757.525	821.81	723.264	751.196	1173.05	1080.72	1148.22	1113.96	1132.17	1072.85
Slc35f3	319.361	-1.55197	0.148509	-10.4503	1.46032e-25	3.17749e-23	377.59	550.559	436.083	432.655	529.667	529.921	133.251	228.164	163.905	133.675	130.786	186.074
Gna13	1578.41	0.897007	0.0862652	10.3982	2.52542e-25	5.42078e-23	948.58	1332.28	1043	1093.4	1056.82	1135.82	1842.58	2090.15	2054.1	2169.23	1884.68	2290.3
Ccdc43	608.139	-0.707943	0.0681215	-10.3924	2.6863e-25	5.68923e-23	795.965	717.715	809.226	738.336	797.015	669.524	467.472	475.682	438.843	469.492	443.11	475.286
Nat8l	4254.24	0.664582	0.0642369	10.3458	4.37239e-25	9.13829e-23	3018.09	3686.14	3327.94	3442.43	3121.02	3148.19	4894.26	5393.43	5308.41	4845.98	5703.82	5161.16
Rnf150	1164.5	-1.08971	0.105496	-10.3294	5.18925e-25	1.07047e-22	1499.84	1776.58	1500.44	1463.74	1494.3	1770.2	655.335	889.229	743.742	749.883	575.847	854.877
4931428F04Rik	4795.17	0.710388	0.0687974	10.3258	5.38747e-25	1.09711e-22	3216.75	4039.09	3686.47	3676.39	3568.55	3634.42	5345.35	6202.2	5977.25	5456.76	6496.34	6242.51
Lin7a	2068.05	-1.09944	0.107476	-10.2297	1.46005e-24	2.93563e-22	2569.46	3198.96	2455.77	2780.52	2804.22	3108.3	1250.6	1667.43	1207.26	1484.55	1079.47	1210.01
Galnt1	1493.63	-0.588839	0.0581537	-10.1256	4.25518e-24	8.44865e-22	1827.43	1746.13	1785.92	1797.64	1910.83	1697.08	1284.46	1212.12	1185.23	1274.8	1095.09	1106.87
Chrna4	932.238	-1.49445	0.148087	-10.0917	6.01372e-24	1.17928e-21	1231.44	1328.55	1456.61	1239.18	1447.37	1553.67	382.279	604.024	572.787	371.681	359.172	640.094
Fktn	2640.16	0.53966	0.0536611	10.0568	8.57117e-24	1.6603e-21	2085.3	2413.51	2120.85	2005.73	2090.17	2187.11	3039.66	3075.12	3163.55	3234.28	3024.66	3241.94
Sprn	2663.33	-0.798086	0.0794142	-10.0497	9.21818e-24	1.76412e-21	3198.33	3763.81	3094.16	3442.43	3282.76	3507.16	1748.65	2289.79	1976.56	1767.12	1810.5	2078.71
Zdhhc12	181.767	-1.23424	0.12385	-9.96561	2.1554e-23	4.07575e-21	278.917	232.403	291.096	232.787	295.843	200.382	96.1158	119.175	108.389	117.373	103.457	105.265
Tshr	151.392	-1.32713	0.133344	-9.95269	2.45463e-23	4.58699e-21	242.079	188.905	220.289	226.909	240.529	180.439	92.8391	102.878	73.1405	101.071	73.2009	74.4296
Ei24	3888.71	-0.646118	0.0650938	-9.92595	3.21026e-23	5.92927e-21	5061.29	4200.65	4872.21	4708.65	4952.22	4680.97	3044.03	3148.46	3299.25	2962.58	2652.8	3081.38
Zdhhc2	5637.56	-0.886648	0.0893874	-9.91916	3.43651e-23	6.2742e-21	8007.02	7052.87	6853.69	7331.63	7553.63	7104.55	4267.32	4015.28	3812.12	4639.49	3023.69	3989.42
6030458C11Rik	1480.37	0.597917	0.0603301	9.91077	3.73761e-23	6.74639e-21	1127.51	1277.6	1089.08	1238.01	1131.41	1198.49	1838.21	1683.73	1722.77	1735.6	1765.61	1956.43
Tmc7	577.052	1.00674	0.101614	9.90749	3.86236e-23	6.89322e-21	411.797	416.337	338.301	397.385	336.071	400.765	800.601	719.125	739.336	657.506	739.817	967.584
Tm6sf1	302.945	-1.19602	0.121133	-9.87359	5.41905e-23	9.56403e-21	419.691	444.3	450.694	371.519	425.745	418.808	181.309	220.015	201.797	207.576	173.73	120.151
Tmem230	637.031	0.739292	0.0749768	9.86028	6.18758e-23	1.0683e-20	439.425	487.177	503.518	474.98	492.792	464.393	839.921	689.586	852.131	735.755	872.555	792.143
Atm	664.543	-0.649444	0.0658601	-9.86097	6.14509e-23	1.0683e-20	786.756	852.559	857.554	821.81	792.825	756.894	477.302	543.927	505.815	527.092	483.126	568.854
Ccny	3348.88	-0.432472	0.0439175	-9.84737	7.0363e-23	1.20177e-20	3869.31	3957.07	3762.9	3703.44	3856.01	3929.77	2731.65	2944.74	2844.55	3001.71	2663.54	2921.89
Slc25a16	973.656	-0.809419	0.0825735	-9.80241	1.09931e-22	1.85759e-20	1223.55	1332.28	1148.65	1330.89	1092.02	1310.56	672.81	808.761	687.344	710.759	607.08	759.181
Acad8	395.45	-0.850226	0.086854	-9.78914	1.25361e-22	2.09603e-20	522.311	467.292	534.988	571.387	501.173	457.745	316.745	276.038	298.73	259.742	247.907	291.339
Idnk	479.245	-0.935617	0.0957446	-9.77201	1.48477e-22	2.45667e-20	618.353	573.551	635.017	679.551	631.913	639.134	356.065	362.618	324.286	364.074	325.012	241.364
Ina	10927.1	-0.979421	0.100919	-9.70504	2.86954e-22	4.69895e-20	12790.7	15813.4	14073.8	14650.3	15145.8	14525.3	5938.42	9141.85	7810.17	8065.05	6876.98	6293.55
Rad9a	262.311	-1.0624	0.109545	-9.69825	3.06725e-22	4.97145e-20	332.858	374.082	328.186	363.289	398.089	331.438	149.635	207.792	176.242	182.58	172.754	130.783
Slc32a1	3894.5	-1.21167	0.125588	-9.64801	5.01191e-22	8.04133e-20	6479.55	4527.51	5339.76	5275.34	5174.31	5845.27	2600.59	2713.52	1822.34	2377.89	2812.87	1765.04
Vegfb	1249.55	-0.630473	0.065538	-9.61996	6.58598e-22	1.04612e-19	1460.37	1506.89	1522.92	1408.48	1594.03	1616.35	878.148	1085.82	969.332	960.72	1058	933.559
Nudt5	896.444	1.03792	0.108118	9.59989	8.00295e-22	1.2586e-19	605.197	512.654	613.663	584.32	670.465	538.468	1481.06	971.735	1191.4	1250.89	1315.66	1021.81
1810013L24Rik	1954.93	-0.658368	0.0686014	-9.59701	8.22948e-22	1.28154e-19	2252.38	2656.48	2124.22	2352.56	2412	2557.49	1459.21	1670.49	1456.64	1487.81	1431.81	1598.11
Ube2k	3709.28	-0.593326	0.0618437	-9.59397	8.47598e-22	1.30711e-19	4561.34	4753.7	4143.91	4547.58	4184.54	4575.55	2880.2	3148.46	2922.09	2985.4	2605.95	3202.6
Mtmr6	3979.89	-0.733499	0.0767861	-9.5525	1.26601e-21	1.93358e-19	4557.39	5583.89	4744.08	4829.75	4935.46	5168.15	2807.02	3540.62	2967.92	3119.08	2821.65	2683.72
Ubfd1	7620.18	0.418903	0.0439751	9.52591	1.636e-21	2.47488e-19	6369.04	6768.27	6210.81	6585.06	6638.44	6551.83	9073.11	8219	8996.28	9137.71	8571.34	8321.22
Slc38a10	4144.29	-0.526307	0.0552645	-9.52342	1.67571e-21	2.51104e-19	4920.51	4767.99	5052.04	5075.47	4950.55	4589.8	2979.59	3593.59	3583.88	3332.09	3458.01	3428.01
Arpp19	6124.76	0.629556	0.066229	9.50574	1.98622e-21	2.94851e-19	4867.89	5025.25	4445.12	4672.21	4901.94	4938.33	8087.92	6813.35	6904.29	7416.23	6972.63	8452.01
Unkl	427.947	-0.800883	0.0844262	-9.48619	2.39628e-21	3.5243e-19	611.775	517.004	588.936	493.791	509.553	543.216	300.362	359.562	279.344	305.387	307.444	318.984
Arl4c	7591.52	0.462102	0.0488024	9.46884	2.82975e-21	4.12365e-19	6390.09	6520.34	5947.81	6712.04	6086.98	6658.2	9350.53	8389.11	8700.19	8745.38	9165.73	8431.81
Enox2	570.078	-0.723264	0.0764625	-9.45907	3.10708e-21	4.48662e-19	701.239	735.736	656.372	826.513	657.894	683.769	391.016	442.068	447.655	459.711	415.781	423.185
Kif5a	25704.5	-0.843541	0.0893901	-9.43662	3.84981e-21	5.50905e-19	31809.7	35786.3	32180.2	31361.6	31925.9	35008	15428.8	21854.9	18548.6	16761.5	16571.7	21216.7
Vwa5a	464.959	-1.60226	0.169924	-9.4293	4.12829e-21	5.8548e-19	655.191	741.329	556.343	804.175	768.521	670.473	288.347	306.596	185.935	269.523	199.106	133.973
Thbs1	562.109	-1.06498	0.113237	-9.40487	5.20932e-21	7.32255e-19	842.013	786.691	644.009	735.984	757.626	795.831	399.754	448.18	292.562	411.892	306.468	324.3
Scarb1	1209.75	-0.837629	0.0891089	-9.40006	5.45319e-21	7.59811e-19	1476.15	1531.13	1602.72	1399.08	1522.79	1776.85	784.217	983.958	977.263	791.181	746.649	925.053
Cbln2	690.22	-1.1446	0.121934	-9.38703	6.17154e-21	8.52424e-19	1159.08	825.839	910.379	1189.8	775.225	845.214	520.991	404.38	417.694	379.289	417.733	437.008
Plpp6	1022.79	0.560935	0.0599022	9.36418	7.66434e-21	1.04949e-18	853.854	859.394	771.012	852.378	754.273	867.057	1292.1	1126.56	1185.23	1245.46	1220.02	1246.16
Twsg1	1650.07	0.524075	0.0561955	9.32593	1.10018e-20	1.49361e-18	1345.91	1427.35	1283.52	1257.99	1392.89	1406.47	2062.12	1832.44	1862.88	1964.91	1885.66	2078.71
Samd4b	1988.68	-1.47831	0.159096	-9.29192	1.51526e-20	2.0397e-18	2262.91	3609.7	2563.67	3179.08	2544.42	3400.8	713.223	1487.14	989.6	1136.78	1103.87	872.952
Mknk2	2930.24	0.556171	0.0598856	9.28722	1.58366e-20	2.11385e-18	2430	2238.9	2515.34	2306.71	2442.17	2304.87	3301.79	3261.53	3475.5	3474.46	3989.94	3421.63
Dele1	1119.61	-0.811155	0.0873684	-9.28431	1.62762e-20	2.15442e-18	1380.11	1425.49	1424.01	1346.17	1431.44	1549.88	707.761	957.475	838.031	909.641	676.376	788.953
Vmac	385.625	0.863962	0.0932894	9.26109	2.02353e-20	2.65634e-18	276.285	240.481	294.468	297.451	254.777	282.055	554.85	418.641	534.895	453.19	527.047	493.362
Apaf1	1369.58	-0.711527	0.0770115	-9.23923	2.48281e-20	3.23254e-18	1643.24	1706.98	1827.5	1540.16	1809.42	1676.18	990.648	1004.33	1200.21	1072.66	883.291	1080.29
Rasa1	2901.91	-0.653821	0.071	-9.20874	3.29961e-20	4.26106e-18	3486.46	3660.66	3540.36	3842.17	3667.44	3093.1	2305.69	2302.01	2249.73	2509.39	2224.33	1941.55
Ing1	1124.56	-0.612784	0.066685	-9.18924	3.9563e-20	5.06789e-18	1295.91	1280.7	1493.7	1332.06	1487.59	1269.72	859.581	846.448	935.846	921.595	830.586	941.002
Prdx5	3893.79	-0.877283	0.0955053	-9.1857	4.08873e-20	5.19563e-18	5752	4172.69	5398.21	5227.13	5130.73	4577.45	3044.03	2793.99	2679.76	2866.94	2913.4	2169.09
Nrbf2	326.976	-0.693413	0.0755796	-9.17461	4.53233e-20	5.71361e-18	397.325	400.181	410.232	425.601	386.356	404.563	265.411	238.35	248.501	279.304	225.459	242.428
St6galnac4	907.034	-0.590336	0.0649221	-9.093	9.6344e-20	1.20498e-17	1053.83	1116.65	1168.88	1040.49	1102.08	1058.89	642.228	801.63	763.129	724.887	729.081	682.625
Gdpd5	1139.76	-0.819748	0.0903231	-9.07574	1.12913e-19	1.40118e-17	1445.89	1457.8	1592.6	1305.02	1534.53	1395.08	659.704	951.363	783.396	761.838	887.195	902.724
Ctnnd2	7365.93	-0.840231	0.0928763	-9.04677	1.47253e-19	1.79963e-17	8351.72	10412.2	9179.09	9465.51	9532.34	9771.25	4211.62	6420.17	5576.3	5279.61	4770.75	5420.6
Mllt3	1200.74	-0.727911	0.0804611	-9.04675	1.47288e-19	1.79963e-17	1506.41	1433.57	1506.06	1548.39	1702.98	1286.81	877.056	942.196	919.984	936.81	766.17	982.47
Hs2st1	2626.2	-0.651238	0.0720088	-9.04386	1.51231e-19	1.8337e-17	3149.65	3386.62	3068.31	3057.98	3266	3322.93	1924.5	2231.73	2095.52	2223.57	1686.55	2101.04
Fam91a1	2711.36	-0.737194	0.0816183	-9.03222	1.68229e-19	2.02436e-17	3214.12	3633.94	3224.54	3547.07	3175.49	3539.45	1858.97	2352.94	2022.38	2298.55	1742.18	1926.66
Spag9	11815.8	-0.58972	0.0656559	-8.98198	2.65937e-19	3.15234e-17	13793.2	15085.7	14340.2	13982.5	13970	14012.5	8679.91	10589.3	9741.78	9324.63	8176.05	10093.7
Grb2	7421.98	0.280952	0.0312786	8.98223	2.65323e-19	3.15234e-17	6657.16	6980.17	6526.63	6663.83	6585.64	6789.25	8092.29	7960.28	8268.4	8161.77	8281.46	8096.87
Nol10	696.942	-0.801513	0.0892666	-8.97887	2.73572e-19	3.21883e-17	827.541	987.402	794.615	901.757	824.672	976.27	467.472	609.117	505.815	469.492	467.51	531.64
Cacng2	1941.51	-0.874486	0.0980271	-8.92086	4.62677e-19	5.4038e-17	2394.47	2672.64	2340.01	2364.32	2455.58	2846.19	1202.54	1625.67	1290.97	1312.84	1157.55	1635.32
Lpcat1	2610.45	0.542309	0.0608267	8.91564	4.84987e-19	5.62301e-17	2097.14	2259.41	2099.49	1864.65	2194.1	2232.7	2987.23	3005.86	3301.02	2919.11	3045.16	3319.56
Nudcd3	5984.42	-0.490794	0.0550651	-8.91297	4.96833e-19	5.71862e-17	6884.77	6960.91	6972.83	7232.87	6894.9	7012.43	4560.04	5527.89	5357.76	4764.47	4718.04	4926.17
Fam102a	1252.74	0.704479	0.0790626	8.9104	5.08497e-19	5.81077e-17	877.535	1101.74	895.768	926.447	870.767	1038.95	1416.62	1636.87	1479.55	1570.41	1727.54	1490.72
Stox2	9255.17	-0.69176	0.0777381	-8.89859	5.65607e-19	6.36128e-17	10713.3	12677.2	11333.7	10991.6	11123	11753.2	6156.87	8065.2	6936.89	7061.94	6323.58	7925.68
Ipo11	2876.24	-0.508415	0.0571382	-8.89799	5.68686e-19	6.36128e-17	3119.39	3481.7	3489.79	3544.72	3227.45	3403.65	2203.02	2521.01	2509.69	2432.23	2181.39	2400.88
Ipo11-lrrc70	2876.24	-0.508415	0.0571382	-8.89799	5.68686e-19	6.36128e-17	3119.39	3481.7	3489.79	3544.72	3227.45	3403.65	2203.02	2521.01	2509.69	2432.23	2181.39	2400.88
Tonsl	3284.8	-0.462932	0.0520877	-8.88754	6.24794e-19	6.94002e-17	3818	3763.81	3870.8	3855.1	3799.02	3739.84	2691.24	3046.6	2840.14	2799.56	2729.91	2463.62
Atp8b2	2692.94	-0.451512	0.0508226	-8.88408	6.44515e-19	7.10936e-17	3049.67	3190.26	3111.02	3356.61	2947.53	3013.33	2128.75	2286.73	2318.47	2235.52	2449.79	2227.57
Ppp6r1	5331.84	-0.684333	0.0776558	-8.81239	1.22511e-18	1.34204e-16	6061.18	6962.15	6408.62	6854.3	6377.8	6774.06	3569.39	4964.61	3998.05	4201.52	4047.52	3762.95
Rab3d	2088.01	-0.555779	0.0631537	-8.80042	1.363e-18	1.48287e-16	2294.49	2470.06	2654.71	2419.58	2511.73	2561.28	1529.11	1803.92	1852.31	1712.78	1546.98	1699.12
Rfk	1669.15	-0.742752	0.0844617	-8.79395	1.44394e-18	1.56024e-16	2052.41	2165.57	2026.44	2231.47	2139.62	1921.2	1167.59	1364.91	1297.14	1483.46	1056.05	1123.89
Stard5	250.849	-1.00617	0.114711	-8.77136	1.76518e-18	1.89446e-16	265.76	315.049	352.912	345.654	393.06	337.136	141.989	175.198	195.629	183.667	154.21	149.922
Slc35e2	1562.51	-0.778816	0.088914	-8.75921	1.96629e-18	2.09614e-16	1757.7	2251.33	1835.37	1812.92	1940.16	2245.04	1021.23	1279.35	1216.07	1246.54	1036.52	1107.94
Zmat4	1239.15	0.878431	0.100341	8.75445	2.05094e-18	2.17181e-16	934.108	1010.39	747.41	964.069	734.997	847.114	1870.98	1514.64	1558.86	1662.78	1670.93	1353.55
Prkcq	318.465	-1.04087	0.119006	-8.74635	2.2037e-18	2.31812e-16	407.85	439.329	392.25	383.276	502.849	444.45	207.523	247.517	220.303	241.267	154.21	180.757
Prrg3	1356.51	-0.808057	0.0924442	-8.74102	2.31024e-18	2.4142e-16	1545.88	1903.34	1707.24	1703.58	1672.81	1826.23	846.474	1203.97	1053.93	962.893	838.395	1013.31
B3gnt5	737.75	-1.17578	0.134607	-8.73489	2.43903e-18	2.53213e-16	1030.15	932.098	1047.5	1155.71	1111.3	860.409	476.21	475.682	513.746	580.344	321.108	348.756
Pidd1	215.77	0.863089	0.0989777	8.72004	2.78115e-18	2.86856e-16	136.827	148.514	176.456	177.53	147.502	133.905	285.071	259.74	302.255	258.655	293.78	269.01
Sv2a	22113.5	-0.569624	0.0655301	-8.69255	3.54391e-18	3.63171e-16	26227.4	27387.5	25567	27097.4	26192.6	26067.7	16927.3	20032.6	17848	18347.1	18673.1	14994.4
Numbl	2713.43	-0.744286	0.0857648	-8.67822	4.01997e-18	4.09315e-16	3145.71	3355.55	3644.89	3481.23	3526.65	3236.51	1670.01	2441.56	2047.93	1967.08	2195.05	1849.04
Calcoco1	1124.99	-0.593231	0.0683663	-8.67724	4.05492e-18	4.10245e-16	1302.49	1308.04	1425.14	1277.98	1387.86	1416.92	894.532	1034.89	922.628	893.339	824.73	811.282
Mdh2	9569.81	-0.615615	0.070988	-8.6721	4.24228e-18	4.26483e-16	11168.5	12017.2	11273	11180.8	11247.1	12599.4	6719.36	8756.82	7471.79	7740.1	7896.91	6766.71
Desi2	1237.48	-0.673477	0.0777571	-8.66129	4.66475e-18	4.66006e-16	1432.74	1596.99	1489.2	1413.18	1676.16	1514.74	979.725	1024.7	963.163	1029.19	773.002	956.951
Setd7	4442.65	0.764059	0.0883827	8.64489	5.38572e-18	5.34668e-16	2845.74	3916.68	3148.11	3318.98	2836.07	3686.65	5429.45	5742.81	5262.59	5516.53	6298.21	5310.02
Dgkg	934.018	-0.848708	0.0986828	-8.60037	7.94624e-18	7.83963e-16	1001.21	1368.32	1155.39	1238.01	1152.36	1288.71	706.669	820.984	650.334	612.948	641.24	572.044
Cnot9	2490.8	0.535236	0.0622772	8.59441	8.36962e-18	8.20636e-16	1874.79	2278.67	1927.53	1954	1935.97	2225.1	2755.68	3015.03	3002.29	2972.36	3030.52	2917.64
Dzip1	3768.91	-0.592066	0.06891	-8.59188	8.55602e-18	8.33766e-16	4994.19	4122.98	4482.21	4290.11	5116.49	4185.23	2992.69	2969.19	3037.53	3259.27	2780.66	2996.32
Mfsd6	2612.72	-0.654357	0.0761891	-8.58859	8.8043e-18	8.52729e-16	2987.83	3501.58	3159.35	3172.02	3213.2	3135.84	1722.44	2314.24	2157.2	2074.68	1815.38	2098.91
Gclm	1111.45	-0.814135	0.0948702	-8.58157	9.35909e-18	9.00968e-16	1444.58	1534.85	1282.4	1373.21	1350.15	1514.74	727.421	932.01	766.653	865.083	638.312	908.041
Nrep	36392.2	0.619164	0.0721904	8.57681	9.75395e-18	9.33324e-16	29633.6	27900.2	29017.5	26361.4	29244.8	30045.9	49182.9	38146.2	45181.4	41944.5	40662.6	49385.1
Dhrs7	257.99	-0.990578	0.115576	-8.57078	1.02784e-17	9.77615e-16	322.333	340.526	370.895	360.938	362.889	301.998	158.373	198.625	185.054	211.923	148.354	133.973
Nsmf	17830.9	0.475636	0.0555096	8.56855	1.04798e-17	9.90842e-16	15252.3	14133.7	15777.7	14676.2	14355.5	15317.4	21192.4	19257.5	20259	19680.6	23298.4	20770.1
Gosr2	4110.39	-0.367918	0.0429439	-8.5674	1.05847e-17	9.94834e-16	4244.27	4735.06	4694.63	4765.09	4767.84	4578.4	3587.96	3628.22	3709.02	3621.17	3426.78	3566.24
Snx27	4543.79	-0.694957	0.0811547	-8.56336	1.09627e-17	1.0243e-15	5199.43	6323.97	5481.38	5403.49	5496.14	5797.79	2945.73	4007.13	3570.67	3538.58	3082.25	3678.95
Casp9	1249.72	0.460947	0.0538826	8.55465	1.18223e-17	1.09816e-15	1047.25	1038.36	1125.05	1055.77	1050.12	997.163	1499.62	1355.74	1550.93	1372.61	1436.69	1467.33
Eif4a1	12282.8	-0.425114	0.0497509	-8.54485	1.28702e-17	1.18855e-15	14914.2	13294.2	14072.7	14994.8	14442.7	12764.6	10742	10381.5	10536.6	10657	10514.6	10078.8
Mesd	1494.52	0.488595	0.0572607	8.53283	1.42815e-17	1.31126e-15	1245.92	1324.82	1152.02	1220.37	1200.97	1315.31	1821.83	1742.81	1815.29	1580.19	1717.78	1796.94
Ypel2	795.36	0.544146	0.0639132	8.51383	1.6828e-17	1.53619e-15	742.024	643.769	599.052	639.577	633.59	627.738	1025.6	910.62	928.796	936.81	900.859	955.888
Map7d2	3394.75	-0.891924	0.104773	-8.51288	1.69672e-17	1.54004e-15	4077.18	5041.41	4032.64	4420.61	4289.3	4608.79	1997.68	2961.04	2418.04	2734.36	2145.27	2010.66
Tlcd3a	521.606	0.722865	0.0851489	8.48942	2.0767e-17	1.87422e-15	402.587	377.81	432.711	338.6	453.402	356.13	672.81	576.522	695.275	656.419	632.456	664.55
Cnih4	845.88	-0.730547	0.086127	-8.48221	2.20951e-17	1.98282e-15	953.843	1100.5	1041.88	1086.34	975.527	1173.8	628.029	683.474	651.215	742.276	566.087	547.589
Vamp3	613.163	0.771035	0.0911809	8.45611	2.7645e-17	2.46693e-15	460.476	462.942	445.074	443.237	477.706	427.356	906.546	707.92	735.811	760.751	641.24	888.902
Zfta	8407.82	0.618263	0.0731509	8.45189	2.86621e-17	2.5434e-15	6240.11	6635.29	7018.91	6657.95	6949.37	6298.27	9125.54	9740.78	10428.2	9879.98	12297.8	9621.61
Rimoc1	3112.86	-0.678611	0.0805923	-8.4203	3.75536e-17	3.3139e-15	3900.89	3917.92	3666.24	3943.28	3811.59	3749.33	2431.29	2524.07	2300.84	2924.54	2149.18	2035.12
Gpd2	2593.51	-0.884703	0.105132	-8.4152	3.92237e-17	3.44215e-15	3087.82	3818.49	3324.57	3226.1	3169.62	3560.35	1447.2	2230.71	1954.53	1845.36	1491.35	1966
Ap1g2	263.855	1.53068	0.182087	8.40632	4.23065e-17	3.69229e-15	181.559	105.638	127.003	114.042	150.017	137.703	499.147	253.629	341.029	310.821	435.301	510.374
Paqr4	1717.76	-0.494732	0.0588987	-8.39972	4.47544e-17	3.88458e-15	1961.63	1926.96	2188.28	2049.23	2026.48	1907.9	1305.21	1553.35	1490.13	1416.08	1439.62	1348.24
Psmb10	790.641	-0.667953	0.0795697	-8.39456	4.67649e-17	4.03703e-15	966.999	896.678	1016.03	1078.11	947.87	919.289	666.257	692.641	561.331	575.997	629.528	536.956
Coro6	178.05	-1.17703	0.140266	-8.39139	4.80447e-17	4.12509e-15	249.973	262.852	234.9	261.004	227.12	245.967	119.052	117.138	115.439	120.633	122.978	59.5436
Oxr1	3131	-0.720293	0.085958	-8.3796	5.31098e-17	4.53547e-15	3939.04	4118.63	3562.84	4306.57	3669.96	3782.57	2440.03	2612.68	2219.77	2748.48	2222.38	1948.99
Fam131c	630.69	-0.956033	0.114148	-8.37537	5.50501e-17	4.67602e-15	893.323	705.287	950.84	715.998	989.774	739.8	422.691	464.477	435.318	489.054	423.589	338.123
Stat5b	585.216	-0.85141	0.101746	-8.36803	5.85919e-17	4.95039e-15	928.845	620.156	778.88	711.295	710.693	771.139	462.011	427.808	378.039	455.364	415.781	362.578
Slc9a1	1085.22	-0.908134	0.108605	-8.36181	6.1763e-17	5.19071e-15	1265.65	1564.06	1382.43	1317.95	1424.74	1538.48	594.17	967.661	684.701	781.4	677.352	824.041
Twf1	1568.54	0.450696	0.0541815	8.31825	8.92696e-17	7.46294e-15	1305.12	1420.52	1262.17	1326.18	1297.35	1335.25	1914.67	1695.95	1718.36	1941	1803.67	1802.26
Chp1	3278.78	0.498514	0.0601181	8.29225	1.11124e-16	9.24133e-15	2606.29	3097.67	2570.42	2740.54	2493.29	2793.01	3790.02	3731.1	3909.05	3673.34	4066.07	3874.59
Kifc2	7186.26	-0.479538	0.0579381	-8.27673	1.26602e-16	1.04737e-14	9185.83	7623.32	8666.58	8088.77	8680.01	7979.2	5833.57	6019.87	5869.74	5605.65	6293.33	6389.25
Amz2	7400.27	0.555669	0.0672034	8.26846	1.35695e-16	1.11678e-14	6046.71	5637.95	6617.67	5678.6	6368.58	5607.85	9205.27	7640.44	9506.5	8664.95	8684.56	9144.2
Klf9	1158.31	-1.11691	0.135221	-8.25991	1.4578e-16	1.19359e-14	1324.85	1886.57	1449.86	1490.78	1507.71	1851.87	576.695	990.07	688.226	837.913	700.777	594.373
Chst11	2558.62	0.655727	0.0794892	8.24927	1.59369e-16	1.29817e-14	1695.87	2294.2	1836.49	1949.3	1907.47	2230.8	2824.49	3344.03	3086	3156.03	3161.3	3217.48
Tsn	5931.23	0.423607	0.0514158	8.23886	1.73854e-16	1.40893e-14	5177.06	5365.78	4717.11	4856.79	5070.39	5207.09	7150.79	6438.51	6847.89	7277.13	6568.56	6497.7
Nebl	868.607	-0.95749	0.11638	-8.22727	1.91535e-16	1.54433e-14	1103.83	1285.67	990.177	1161.59	1022.46	1314.36	543.928	721.162	504.934	606.427	473.366	695.385
St3gal4	614.588	0.658706	0.0802396	8.20924	2.22592e-16	1.78568e-14	480.21	467.292	468.676	440.885	529.667	471.99	703.393	730.329	791.327	887.905	727.129	676.246
Bmi1	1520.06	-0.849558	0.103832	-8.18203	2.79105e-16	2.21665e-14	2178.71	1761.04	1765.69	2225.59	1842.1	1958.24	1229.84	1041	1008.99	1340.01	902.811	986.723
Tmem132d	304.306	-0.757707	0.0926027	-8.18234	2.78395e-16	2.21665e-14	376.275	336.177	395.621	390.33	401.441	396.966	210.799	270.945	229.996	191.275	226.435	225.415
B4galt5	2572.38	0.514752	0.0630849	8.15966	3.35964e-16	2.65495e-14	2215.55	2176.14	2264.71	1798.81	2130.4	2122.53	2918.42	2987.52	3021.67	2908.24	3007.09	3317.43
Dpagt1	631.868	-0.70009	0.0858548	-8.15435	3.51075e-16	2.76063e-14	715.711	836.403	757.525	763.025	729.131	890.799	423.783	538.834	515.508	497.748	492.886	421.059
Mfap3	2326.86	0.529687	0.0649642	8.15352	3.53493e-16	2.76596e-14	1845.85	2098.46	1740.96	1842.31	1855.51	2037.06	2822.31	2579.07	2753.78	2587.64	2692.82	3066.5
Trappc14	4818.13	0.563281	0.0694312	8.1128	4.94658e-16	3.85154e-14	3819.32	4026.04	3726.93	4238.38	3799.02	3726.54	5394.5	5934.31	5444.12	5612.17	6797.93	5298.32
Sfmbt1	1177.75	-0.578236	0.0714539	-8.09243	5.84875e-16	4.53179e-14	1274.86	1541.69	1397.04	1439.05	1442.34	1365.64	928.391	1004.33	1007.22	1030.27	846.203	855.94
Cmtr1	326.678	-0.747144	0.0923935	-8.08654	6.13811e-16	4.7329e-14	421.006	415.094	400.117	420.898	427.421	374.173	198.785	268.908	278.463	234.746	262.547	217.972
Tmod2	24322.2	-0.809837	0.100156	-8.0858	6.1758e-16	4.73896e-14	27582.5	36854.5	29743.5	29807.4	29701.6	32157.1	15030.1	21274.3	17382.8	16889.8	15188.7	20254.4
Plppr4	12991.4	-0.837255	0.103556	-8.08507	6.21292e-16	4.74452e-14	14656.3	19763	15424.7	16988.8	14702.5	18415.2	8050.79	11521.3	9158.42	10058.2	8242.42	8915.6
Slc25a38	913.414	-0.500072	0.0619469	-8.07259	6.88223e-16	5.23049e-14	993.312	1060.11	1104.82	1159.23	1068.55	1035.15	723.053	822.002	716.424	758.577	805.21	714.524
Alg14	364.877	-0.610096	0.0757104	-8.05829	7.73706e-16	5.85217e-14	498.63	422.551	432.711	433.831	435.802	424.506	316.745	297.428	294.324	269.523	266.451	286.022
Cpox	743.134	-0.870138	0.10813	-8.04717	8.47298e-16	6.37843e-14	877.535	1042.71	873.289	1108.68	857.357	1003.81	480.579	630.507	504.934	610.774	508.502	418.932
Snap29	2334.92	0.525198	0.065328	8.0394	9.02792e-16	6.76412e-14	1826.12	1985.99	1910.67	2138.59	1877.3	1748.36	2971.94	2509.81	2802.25	2891.94	2802.13	2554
Colgalt2	772.005	0.839684	0.104783	8.01356	1.11437e-15	8.31018e-14	384.168	605.242	588.936	580.793	535.534	622.04	927.299	954.419	1066.27	1057.44	1042.38	899.534
Nop16	1066.06	-0.595413	0.074365	-8.00663	1.17895e-15	8.75064e-14	1210.39	1296.24	1325.11	1249.76	1252.09	1364.69	785.309	979.884	870.636	820.524	908.667	729.41
Zdhhc7	1352.79	0.612792	0.0766155	7.99828	1.26167e-15	9.32114e-14	1024.89	1165.74	1051.99	1000.52	969.66	1202.29	1602.29	1647.06	1571.2	1604.1	1893.46	1500.29
Tmem143	686.769	-0.629073	0.078781	-7.98508	1.40426e-15	1.03265e-13	877.535	755.621	921.618	850.027	765.168	839.516	493.685	588.745	513.746	505.356	607.08	523.133
Kdm7a	482.02	-0.897368	0.112442	-7.9807	1.45508e-15	1.06509e-13	517.049	679.81	704.701	601.955	708.179	549.864	326.575	356.507	362.178	377.115	254.739	345.566
Stc1	788.822	0.881154	0.110712	7.959	1.7343e-15	1.26365e-13	465.738	673.596	467.553	612.536	590.847	514.726	1029.97	1050.17	830.982	1204.16	998.461	1027.13
Abat	8124.74	-0.67024	0.0842636	-7.95409	1.80455e-15	1.30884e-13	10381.8	10511	9099.29	8875.31	9631.23	11371.5	6677.86	6866.32	5941.12	6069.71	5239.23	6832.63
Zbtb5	1405.43	0.481784	0.0606592	7.94248	1.98185e-15	1.43089e-13	1070.94	1229.75	1254.3	1226.25	1129.73	1123.47	1655.81	1558.44	1643.46	1722.56	1509.89	1740.59
Mindy2	2887.9	-0.670751	0.084487	-7.9391	2.03661e-15	1.46378e-13	3562.77	3894.93	3323.44	3496.51	3436.97	3566.99	2205.2	2393.69	2212.72	2582.21	1741.21	2238.2
Washc5	1573.2	-0.743156	0.0937431	-7.92758	2.23458e-15	1.59883e-13	1691.92	2272.45	1854.48	1928.14	1927.59	2140.58	989.555	1391.39	1231.05	1192.21	1062.88	1196.19
Canx	15189.7	-0.55587	0.0701313	-7.92613	2.26074e-15	1.61029e-13	16702.1	19735	16760	18192.7	18214	18873.9	11448.7	14020.9	12375.7	12936	10900.1	12117.1
Ankrd13a	1454.29	0.457448	0.0578142	7.91238	2.52504e-15	1.79052e-13	1138.03	1268.9	1249.8	1136.9	1231.98	1322.9	1687.49	1663.36	1663.73	1612.79	1845.64	1630.01
Htr3a	465.011	1.34845	0.170991	7.88609	3.11799e-15	2.20116e-13	353.909	192.634	271.99	264.531	231.31	263.061	841.013	498.091	617.729	489.054	901.835	654.98
Ralb	1263.21	-0.530951	0.0675362	-7.86173	3.78876e-15	2.66286e-13	1498.52	1372.67	1604.96	1468.44	1635.1	1381.78	1080.21	1042.02	1135	981.369	987.724	970.774
Ermp1	2186.88	0.352019	0.0447821	7.86072	3.81936e-15	2.67254e-13	1828.75	2048.75	1891.56	1850.54	1924.23	1974.38	2582.02	2462.95	2445.36	2394.19	2416.61	2423.21
Chsy1	726.401	0.626783	0.0798432	7.85017	4.15462e-15	2.89439e-13	584.146	579.765	554.095	533.765	649.513	522.323	863.95	845.43	858.299	869.43	813.018	1043.08
Rdh11	2886.81	-0.617718	0.0789382	-7.82534	5.06268e-15	3.5116e-13	3274.64	3574.91	3510.02	3310.75	3960.77	3340.97	2152.77	2356	2562.56	2513.74	2134.54	1950.05
Fkbp1a	11935.5	0.333487	0.042654	7.81841	5.34932e-15	3.69429e-13	10347.5	10536.4	10156.9	10665.9	10606.8	11057.1	13665.9	12306.6	13914.3	13165.3	13049.3	13753.5
Alkal2	147.556	-2.08621	0.266887	-7.81684	5.4167e-15	3.72462e-13	157.877	275.28	192.191	300.978	144.988	361.828	32.7667	93.7103	47.5854	60.8601	65.3928	37.2148
Alk	239.801	-1.22614	0.157034	-7.8081	5.80552e-15	3.97478e-13	364.434	339.284	297.84	278.639	374.622	359.928	187.863	168.067	114.557	159.758	145.426	87.1889
Sult4a1	9728.18	-0.301619	0.0386906	-7.79567	6.40672e-15	4.36757e-13	11131.7	10547.6	10651.4	10946.9	10673	10504.4	8837.19	9037.95	8779.5	8338.92	9041.78	8247.86
Usp20	4881.78	0.462639	0.059353	7.7947	6.45592e-15	4.3823e-13	3924.57	4316.23	4073.1	3938.57	4027.82	4350.48	5075.57	5937.36	5732.28	5249.18	6152.78	5803.38
Phgdh	835.485	-0.501269	0.064352	-7.78949	6.72828e-15	4.54775e-13	889.376	1005.42	1028.39	1015.8	965.47	967.723	739.436	742.552	673.245	705.325	616.84	676.246
Mettl16	1497.22	-0.55784	0.0717215	-7.77785	7.37662e-15	4.96484e-13	1693.24	1853.63	1764.56	2025.72	1751.59	1610.66	1159.94	1287.5	1309.48	1268.28	1087.28	1154.72
Wwtr1	93.1519	-1.22233	0.157221	-7.77462	7.56766e-15	5.07193e-13	149.984	131.115	128.127	110.515	135.769	126.307	44.7812	60.0968	50.229	69.5544	39.0405	72.303
Sqstm1	11252.3	-0.329668	0.0425176	-7.75367	8.92756e-15	5.95821e-13	12225	12690.2	11948.4	13287.7	12401.1	12642.1	9786.33	10504.7	10004.4	9845.2	10291.1	9401.52
Tbc1d8	778.271	0.57149	0.0737827	7.74559	9.51425e-15	6.3232e-13	595.987	647.497	604.671	538.468	709.855	654.329	880.333	892.285	971.975	981.369	884.267	978.217
Kif3b	7802.92	-0.535502	0.0692505	-7.73283	1.05185e-14	6.96152e-13	8343.82	10009.5	9357.79	9052.84	9247.39	9394.22	5704.69	7124.02	6855.82	6034.93	5868.76	6641.24
Lipa	379.261	0.722526	0.0934551	7.73126	1.06488e-14	7.01268e-13	242.079	316.292	301.212	270.41	318.471	264.011	465.288	451.235	515.508	469.492	411.877	525.26
Armcx3	2335.25	-0.535312	0.0692437	-7.73084	1.06841e-14	7.01268e-13	2801.01	2726.08	2661.45	2969.8	2605.59	2819.6	1874.26	2073.85	1962.46	2086.63	1837.83	1604.49
Bcam	168.827	-1.12903	0.146147	-7.72531	1.11579e-14	7.29348e-13	288.126	169.02	203.43	217.503	256.453	257.363	122.329	117.138	105.745	93.4637	110.289	85.0623
Manbal	1323.27	-0.392579	0.0508214	-7.72468	1.1213e-14	7.2995e-13	1518.25	1465.88	1488.08	1521.35	1471.67	1548.93	1116.25	1235.55	1083.89	1097.65	1118.51	1213.2
Kcnd3	3427.73	-0.420881	0.0545629	-7.71368	1.22244e-14	7.92542e-13	4031.14	4206.87	3613.42	4140.79	3851.82	3699	2940.27	3132.16	2779.34	2968.02	2954.39	2815.56
Kcnq2	17345.8	0.581302	0.0753693	7.71272	1.23169e-14	7.95291e-13	12719.7	14845.2	14263.7	12838.6	14139.3	14575.7	19363	20216	21493.6	18366.7	20636.8	24691.5
Prxl2a	2840.78	-0.49685	0.0644883	-7.7045	1.31356e-14	8.44721e-13	3478.57	3026.83	3394.25	3538.84	3394.23	3123.49	2462.97	2320.35	2537.01	2456.14	2290.7	2065.95
Gtf2i	7282.93	0.344173	0.0447421	7.69238	1.4442e-14	9.24986e-13	6119.07	6870.18	6334.44	6201.79	6331.7	6644.9	7664.14	8201.69	8390.89	7934.63	8386.87	8314.84
Aifm2	244.79	-0.997416	0.129681	-7.69132	1.45628e-14	9.2898e-13	365.749	308.835	323.69	259.828	336.071	362.777	178.033	179.272	176.242	188.014	112.241	146.733
Cdc42se1	2622.5	0.535199	0.0696777	7.68107	1.57767e-14	1.00239e-12	1956.36	2373.12	2026.44	2149.17	2091.01	2247.89	2964.3	3240.14	3139.75	3190.81	3395.55	2695.41
Rab31	3042.44	0.723967	0.0943981	7.6693	1.72944e-14	1.09444e-12	2066.88	2397.98	2496.24	2190.32	2223.43	2391.29	3589.05	3513.12	3985.72	3390.78	3381.88	4882.58
Jakmip2	3072.63	-0.392774	0.0512191	-7.6685	1.74015e-14	1.09685e-12	3220.7	3681.17	3487.54	3508.27	3609.62	3417.89	2434.57	2823.53	2640.11	2616.98	2712.34	2718.81
Serf2	1298.75	-0.618861	0.0808771	-7.65187	1.9808e-14	1.2436e-12	1720.86	1331.66	1582.49	1680.07	1547.94	1580.27	1161.03	966.642	1023.09	960.72	1112.65	917.61
St6gal1	699.162	0.6432	0.0842072	7.6383	2.20114e-14	1.37649e-12	594.672	502.711	628.274	510.251	517.096	527.072	857.396	790.426	952.589	769.445	803.258	936.749
Arf2	4273.6	-0.482828	0.0632217	-7.63707	2.22217e-14	1.38419e-12	5338.89	4695.91	5231.87	4968.48	5271.53	4390.37	3614.17	3599.7	3872.04	3575.53	3288.19	3436.52
Spsb4	406.471	-0.858952	0.112554	-7.63145	2.32119e-14	1.44023e-12	477.579	518.868	534.988	527.887	519.61	565.059	295.993	397.25	283.75	252.135	267.427	237.111
Ube3c	6777.85	0.378646	0.0497365	7.61303	2.67746e-14	1.65482e-12	5388.88	6479.94	5946.68	5810.28	6044.24	5680.03	7592.05	7491.73	7839.25	7969.41	7473.33	7618.4
AI504432	1614.84	-1.1053	0.145531	-7.59498	3.07833e-14	1.8952e-12	2391.84	2347.02	1654.42	2483.07	1916.69	2434.98	1122.81	1079.71	862.705	970.501	719.321	1395.02
Slc39a11	1357.95	-0.445334	0.0586663	-7.59096	3.1755e-14	1.94747e-12	1580.09	1510.62	1552.14	1749.43	1553.8	1453.01	1079.12	1225.36	1151.74	1195.47	1117.53	1127.08
Znhit1	1257.53	-0.625349	0.0824261	-7.58678	3.27946e-14	2.00349e-12	1710.34	1339.74	1567.87	1625.98	1524.47	1391.28	983.002	1049.15	982.55	1077.01	1017	821.915
Rhoq	814.865	-0.803518	0.105927	-7.58561	3.3092e-14	2.01392e-12	1005.15	1109.2	991.301	999.34	1021.62	1088.33	531.913	651.898	586.005	562.956	458.726	771.941
Ralbp1	1398.04	-0.723345	0.0954011	-7.58214	3.39896e-14	2.06065e-12	1732.7	1872.27	1658.91	1736.5	1772.54	1674.28	869.411	1325.19	1025.73	1181.34	1000.41	927.18
Ikbkg	1753.48	-0.434992	0.0574539	-7.57115	3.69935e-14	2.23424e-12	2028.72	1996.55	2156.81	1956.35	1924.23	2033.26	1508.36	1596.13	1494.53	1428.04	1331.28	1587.48
Zswim5	926.389	0.581733	0.0768987	7.56493	3.88082e-14	2.33496e-12	728.867	751.271	769.888	672.497	869.09	658.127	1155.57	1012.48	1186.11	1142.21	1065.81	1104.75
Angel1	615.827	0.552463	0.0730793	7.55977	4.03776e-14	2.41647e-12	497.314	526.946	499.022	547.873	455.078	470.091	704.485	766.998	689.107	809.656	753.481	669.866
Unc80	2095.04	-0.682646	0.0903033	-7.55948	4.04673e-14	2.41647e-12	2368.16	3021.24	2292.81	2600.63	2423.73	2778.76	1594.65	1829.39	1380.86	1596.49	1472.8	1780.99
Natd1	810.835	0.613612	0.0813413	7.54367	4.56927e-14	2.71829e-12	647.297	628.234	676.602	613.712	665.437	615.392	990.648	858.672	1048.64	839	1015.05	1131.33
Slc9a3r2	1026.31	-0.560695	0.074424	-7.5338	4.92857e-14	2.9211e-12	1151.19	1224.16	1241.94	1193.33	1259.64	1268.77	691.378	967.661	846.844	842.26	789.594	838.927
Smad5	1108.18	-0.593388	0.0787756	-7.53263	4.97271e-14	2.9363e-12	1377.48	1452.83	1198.1	1254.47	1318.3	1394.13	823.537	973.772	921.746	977.022	759.338	847.434
3300002P13Rik	264.619	1.2068	0.160232	7.53159	5.01253e-14	2.94885e-12	194.715	162.185	133.747	125.799	154.207	188.986	349.512	316.782	341.91	317.342	329.892	560.348
Mcrs1	3697.35	0.380602	0.0506636	7.51235	5.80765e-14	3.40401e-12	3337.79	3295.9	3204.31	3135.58	3043.91	3258.35	4039.05	4321.88	4139.05	3846.14	4189.04	4557.22
Oip5os1	25040.8	-0.587266	0.0782074	-7.50908	5.95439e-14	3.47719e-12	27341.7	34090.5	29432.2	29306.5	29412.5	30820.9	18725.1	23675.1	18879.1	20086	17675.6	21044.4
Rab8a	1536.31	-0.440943	0.0588122	-7.49748	6.50573e-14	3.78524e-12	1731.39	1693.93	1719.6	1831.73	1824.5	1815.79	1348.9	1406.67	1307.72	1278.06	1343.97	1133.46
Scn3a	2747.22	-0.629933	0.0841614	-7.48482	7.1644e-14	4.15326e-12	3550.93	3520.84	3309.96	2929.83	3469.66	3242.2	2195.37	2175.71	2078.78	2131.19	1777.32	2584.83
Zfp322a	1396.47	-0.55256	0.0738849	-7.47866	7.50849e-14	4.3369e-12	1714.29	1618.74	1769.06	1611.88	1818.64	1431.17	1146.84	1071.56	1137.64	1263.93	1017	1156.85
Yipf6	1954.43	0.554892	0.0742381	7.47449	7.75053e-14	4.46049e-12	1611.67	1752.97	1368.94	1687.12	1410.49	1664.79	2544.88	2313.22	2177.47	2268.12	2229.21	2424.28
Hpcal1	2422.12	0.479713	0.0642703	7.464	8.39366e-14	4.81318e-12	1905.05	2257.54	2001.71	1944.6	1960.27	2063.65	2649.74	2908.07	2897.42	2548.52	2817.75	3111.16
Hsd17b10	1044.96	-0.704119	0.0944906	-7.45174	9.21144e-14	5.26311e-12	1263.02	1225.4	1276.78	1363.8	1380.32	1262.12	786.402	903.489	871.517	843.347	782.762	580.551
Mxd1	688.852	0.525635	0.0705857	7.44677	9.56555e-14	5.44585e-12	602.565	567.337	564.21	565.509	497.82	593.549	847.566	791.445	773.703	834.652	892.075	735.789
Stx16	2320.2	0.380391	0.0511003	7.444	9.76814e-14	5.54133e-12	1989.26	2127.67	1932.03	2057.46	1955.24	2031.36	2500.1	2617.78	2604.86	2531.13	2586.43	2909.13
Actr1b	5846.56	-0.306175	0.0411379	-7.44265	9.86886e-14	5.57854e-12	6425.61	6525.93	6482.8	6422.82	6258.79	6672.44	5147.65	5544.19	5123.36	5014.44	5501.78	5038.88
Nptn	9882.63	-0.434803	0.0584453	-7.43949	1.01076e-13	5.69325e-12	11813.2	11508.9	11015.6	11443	11430.6	10951.7	8454.91	8573.47	8196.14	8265.02	7409.88	9529.11
Sgpl1	1137.89	-0.569547	0.0765897	-7.43633	1.03519e-13	5.81023e-12	1211.71	1524.91	1286.89	1393.2	1408.81	1328.6	831.183	1010.44	972.857	898.773	821.802	965.458
Ecsit	1133.97	-0.40158	0.0541209	-7.42005	1.17075e-13	6.54798e-12	1265.65	1231.61	1276.78	1315.6	1337.58	1319.1	973.172	1070.54	1009.87	957.459	926.236	923.99
Brpf3	795.172	-0.570782	0.0769374	-7.41879	1.18195e-13	6.58742e-12	888.06	1068.81	905.883	944.082	900.937	991.465	572.326	686.53	642.403	640.118	582.679	718.777
Nln	2963.78	-0.470331	0.0635766	-7.39786	1.38399e-13	7.68646e-12	3253.59	3543.84	3641.51	3458.89	3445.35	3312.48	2303.5	2719.64	2691.22	2511.56	2187.24	2496.58
Ppargc1a	2207.56	-0.933359	0.126317	-7.38901	1.47921e-13	8.18669e-12	2652.34	3407.13	2501.86	2688.81	2902.28	3231.76	1427.54	2064.68	1322.7	1692.13	1417.17	1182.37
Hipk2	1369.76	-0.736141	0.099688	-7.38445	1.53089e-13	8.44326e-12	1482.73	1733.7	1737.59	1752.96	1680.35	1882.26	889.071	1275.27	892.666	911.814	1036.52	1162.16
Rgs7bp	5174.67	-0.951028	0.128999	-7.37235	1.6764e-13	9.18207e-12	5734.9	8562.25	5708.41	7435.09	6025.81	7457.83	3080.07	4758.85	3216.42	3712.46	3295.99	3107.97
Atp2b3	1935.47	-0.647451	0.0878211	-7.37239	1.67599e-13	9.18207e-12	2232.65	2635.97	2280.44	2205.6	2222.59	2596.42	1332.51	1787.63	1507.75	1331.31	1430.83	1661.91
Tppp	4418.66	-0.652095	0.088483	-7.36972	1.70984e-13	9.33304e-12	5438.88	5069.37	6101.79	4750.98	5796.17	5246.98	3291.96	3295.14	3746.03	3323.39	2891.92	4071.3
Pnoc	1230.81	-1.42073	0.193314	-7.34936	1.99156e-13	1.08336e-11	1176.19	2148.8	1577.99	1888.16	1396.24	2565.08	495.87	1036.92	594.817	672.721	671.496	545.462
Slc44a5	1195.73	0.774673	0.105414	7.34888	1.99873e-13	1.08354e-11	1056.46	817.761	893.52	874.716	895.909	757.844	1818.55	1222.31	1450.47	1444.34	1398.63	1718.26
Ap1m1	3856.98	0.307062	0.0418428	7.33845	2.16078e-13	1.16741e-11	3671.97	3371.71	3463.93	3331.92	3400.93	3453.98	4307.73	4093.71	4266.82	4090.67	4461.35	4369.01
Cmtr2	369.06	0.564598	0.0769584	7.3364	2.19419e-13	1.18144e-11	269.707	311.321	340.549	289.221	281.595	292.501	416.138	412.529	434.437	456.451	460.678	463.59
Fam214b	1348.05	0.51936	0.0710543	7.30934	2.68453e-13	1.44058e-11	1081.46	1121	1199.23	1216.84	1068.55	963.924	1407.88	1590.02	1647.86	1650.83	1690.45	1538.57
Tusc2	2425.11	0.443038	0.0606787	7.30138	2.84839e-13	1.52336e-11	2302.38	1960.51	2018.57	2021.02	2030.67	2006.67	3000.34	2499.62	2922.09	2675.67	2809.94	2853.84
Dusp22	497.34	0.625952	0.0857935	7.29603	2.96379e-13	1.57976e-11	386.8	356.061	393.374	424.425	354.508	434.003	711.038	538.834	578.955	595.559	589.511	605.006
Parp12	113.857	-0.985724	0.135225	-7.28951	3.11083e-13	1.65259e-11	177.612	138.572	135.995	145.786	171.807	138.653	66.6257	98.8032	70.4969	80.4222	70.2729	71.2397
Npdc1	7270.38	-0.440713	0.0604829	-7.28657	3.17937e-13	1.68337e-11	8209.63	8101.79	8775.6	8466.17	8673.3	8008.64	5597.65	6871.41	5964.92	6468.56	6440.7	5666.22
Smug1	1205.53	0.662097	0.0910367	7.27287	3.51937e-13	1.8572e-11	1016.99	804.09	1065.48	921.744	928.594	869.906	1701.69	1206.01	1516.56	1460.64	1466.95	1507.73
Ttll7	3551.2	-0.634042	0.0871859	-7.2723	3.53417e-13	1.85883e-11	3815.37	5076.21	4151.78	4450	4063.86	4354.28	2600.59	3204.48	2635.7	3138.64	2633.28	2490.2
Meak7	893.457	0.384238	0.0529078	7.26241	3.80241e-13	1.99332e-11	763.074	777.37	783.375	771.255	795.339	759.743	1015.77	985.995	1072.43	1027.01	929.164	1040.95
Dnm1l	8221.8	-0.483055	0.0665271	-7.26102	3.84178e-13	2.00733e-11	8938.49	10442.6	9026.24	9782.95	9445.18	9872.86	6724.83	7614.98	6689.27	7020.64	5925.37	7178.2
F730043M19Rik	755.709	1.02277	0.141041	7.25157	4.1198e-13	2.14554e-11	576.253	448.028	499.022	516.13	504.525	449.198	1098.78	772.091	984.312	779.226	978.94	1462.01
Evl	6916.36	-0.479136	0.0661796	-7.23993	4.48924e-13	2.3303e-11	8060.96	8156.48	7383.06	8328.62	7776.56	8621.19	5371.56	6657.51	5684.69	5752.36	5975.15	5228.14
Api5	3013.47	0.363414	0.0502026	7.23895	4.52184e-13	2.3371e-11	2548.4	2831.71	2502.98	2769.93	2518.43	2638.21	3515.87	3289.03	3300.13	3605.96	3321.37	3319.56
Rragd	3875.89	0.664676	0.0918232	7.23865	4.53177e-13	2.3371e-11	2893.1	3002.6	3374.02	2604.16	3278.57	2836.69	4865.86	4205.76	4816.7	4464.52	4298.36	5870.37
Kctd5	1946.91	0.394598	0.0545211	7.23753	4.56929e-13	2.34882e-11	1665.61	1723.76	1757.82	1591.89	1748.24	1604.01	2193.19	2052.46	2274.4	2138.8	2185.29	2427.47
Phtf1	1152.33	0.405315	0.0560779	7.22772	4.91178e-13	2.51673e-11	1002.52	997.966	987.93	968.772	1025.81	966.773	1343.44	1251.85	1406.41	1269.37	1403.51	1203.63
Gmfb	8536.13	-0.607221	0.0841041	-7.21987	5.20374e-13	2.65775e-11	11536.9	9790.13	10197.4	10580.1	10999.8	8735.15	7619.36	6528.14	6424.91	7640.11	5960.51	6421.14
Zfp180	1629.28	-0.62598	0.0868969	-7.20371	5.85959e-13	2.98313e-11	1660.34	2068.64	2038.8	1988.1	2023.13	2083.6	1056.18	1400.56	1417.87	1216.11	1196.59	1401.4
Dmrtb1	136.57	1.01882	0.141799	7.18494	6.72358e-13	3.40119e-11	96.0421	93.2098	92.1618	82.2986	97.2174	79.773	205.338	155.844	181.529	234.746	135.666	185.011
Styx	121.827	1.04855	0.145932	7.18521	6.71021e-13	3.40119e-11	90.7795	70.218	91.0379	56.4333	90.5128	77.8737	212.984	144.64	153.331	148.89	156.162	169.061
Atp5d	5421.68	-0.672109	0.0935708	-7.18289	6.82531e-13	3.44169e-11	6201.95	6768.89	6769.4	6862.53	6583.97	6786.41	3787.83	5142.86	3836.79	4246.08	4721.95	3351.46
Nfic	651.818	-0.792627	0.110464	-7.17541	7.20919e-13	3.62376e-11	739.393	796.633	791.243	800.648	905.966	924.038	397.57	577.541	432.674	402.111	472.39	581.614
Trp53inp1	1312.34	1.00222	0.139779	7.16998	7.5008e-13	3.75844e-11	1026.2	753.135	904.759	858.257	871.605	831.919	2222.68	1190.73	1498.06	2247.48	1613.35	1729.96
Akt2	2135.37	0.396693	0.0555039	7.14712	8.86172e-13	4.4264e-11	1848.48	1857.36	1880.33	1736.5	1846.29	1891.76	2423.65	2245.99	2463.87	2244.22	2505.42	2680.53
Stim2	1048.54	0.419718	0.0587967	7.13846	9.43799e-13	4.69947e-11	898.586	865.608	922.742	870.013	921.89	903.145	1237.49	1126.56	1172.01	1260.67	1097.04	1306.77
Sipa1l1	3210.51	-0.862525	0.120843	-7.13759	9.49817e-13	4.71465e-11	3728.54	4745	3870.8	3984.43	3852.66	4672.42	1987.85	2621.85	2157.2	1923.61	1922.74	3059.05
Nrm	111.256	0.916606	0.128547	7.1305	1.00007e-12	4.94862e-11	81.57	71.4608	94.4096	68.1902	72.075	76.924	141.989	144.64	165.668	117.373	156.162	144.606
Fer1l5	408.471	-0.676407	0.0948698	-7.12985	1.00479e-12	4.95654e-11	468.37	563.609	451.818	480.859	530.506	517.575	265.411	382.99	321.642	312.995	311.348	294.528
Mgat5	3459.25	-0.911594	0.128059	-7.11857	1.09051e-12	5.36272e-11	3856.16	5417.35	4202.35	4196.05	4359.7	5069.39	1772.68	3174.95	2258.54	2413.75	2104.28	2685.84
Fam210a	1194.3	-0.573608	0.0806066	-7.11614	1.10988e-12	5.44116e-11	1285.39	1605.07	1368.94	1457.86	1360.21	1491	847.566	1074.61	955.232	979.195	854.987	1051.58
Mthfd2	1055.27	-0.994606	0.139878	-7.11051	1.15614e-12	5.63315e-11	1209.08	1570.9	1313.87	1521.35	1482.57	1333.35	565.772	947.289	711.137	809.656	725.177	473.159
Fzd4	239.457	-0.991556	0.139443	-7.11082	1.15358e-12	5.63315e-11	292.073	349.226	291.096	256.301	343.613	377.972	148.543	209.83	167.43	149.977	115.169	172.251
Serpinb9	82.8329	-1.0817	0.152232	-7.1056	1.19803e-12	5.81942e-11	110.514	101.909	111.269	134.029	120.684	96.8672	57.8879	56.0225	54.6351	58.6865	35.1364	56.3538
Scrt2	818.944	0.628019	0.0885732	7.0904	1.33729e-12	6.47609e-11	563.096	667.382	626.026	607.834	734.997	657.178	946.959	1035.91	939.371	885.731	1199.52	963.331
Vps4b	1616.08	0.419558	0.059257	7.08031	1.43833e-12	6.94419e-11	1432.74	1482.66	1237.44	1382.62	1410.49	1345.7	1971.47	1850.78	1789.74	1805.15	1724.61	1959.62
Arfgef3	4102.48	-0.817632	0.115646	-7.07012	1.54795e-12	7.45081e-11	4107.44	5815.67	5141.95	5228.31	5153.36	5960.18	2433.48	3906.29	2669.19	2789.78	2882.16	3141.99
D5Ertd579e	4736.27	0.412208	0.0583938	7.05912	1.67563e-12	8.03674e-11	3862.73	4518.81	3775.26	3995.01	4018.6	4206.13	5297.29	5526.87	5296.08	5297	5097.71	5943.73
Amer3	1950.39	-0.525659	0.0744689	-7.05877	1.6798e-12	8.03674e-11	2268.17	2378.71	2336.64	2123.3	2393.56	2309.62	1479.96	1715.31	1721.89	1437.82	1416.19	1823.52
Rfc1	1179.01	-0.39547	0.0560962	-7.04985	1.79105e-12	8.54324e-11	1234.08	1404.36	1346.46	1306.2	1359.37	1383.68	969.895	1081.74	1087.41	1023.75	975.036	976.09
Pura	739.2	-0.744548	0.105653	-7.04709	1.82699e-12	8.68862e-11	905.164	877.415	803.606	1044.02	856.519	1067.44	549.389	616.247	446.774	524.918	514.358	664.55
Lgi3	268.87	-0.941467	0.13416	-7.01749	2.25887e-12	1.07104e-10	332.858	320.02	351.788	330.37	424.907	361.828	191.139	240.387	200.916	131.501	149.33	191.39
Stk39	2033.95	-0.439062	0.0626898	-7.00372	2.49256e-12	1.17833e-10	2177.39	2448.31	2304.04	2238.52	2418.7	2455.87	1620.86	1935.32	1787.98	1789.94	1602.61	1627.88
Abhd13	2232.84	0.44498	0.0636011	6.99642	2.62586e-12	1.23766e-10	1935.31	1942.49	1951.13	1859.95	1749.08	1908.85	2670.49	2233.77	2489.42	2777.83	2500.54	2775.16
Atp1a1	10415.5	-0.251572	0.0359781	-6.99236	2.70301e-12	1.27025e-10	11661.9	11480.3	11239.2	10885.7	10994.8	11666.8	9151.75	9841.62	9506.5	9305.07	9517.1	9735.39
Rora	772.549	-0.516204	0.0738388	-6.99096	2.73011e-12	1.2792e-10	906.48	812.168	941.849	935.852	927.756	932.585	682.64	672.27	598.342	705.325	564.135	591.183
Tmx2	3546.02	-0.551279	0.0789558	-6.98211	2.90772e-12	1.35842e-10	3960.09	4511.98	4009.04	4013.82	4425.91	4369.47	2645.37	3305.33	3176.76	3012.57	2567.89	2554
Pigs	1619.34	-0.554748	0.0795042	-6.9776	3.00265e-12	1.39865e-10	1798.49	2043.16	2034.3	1774.12	1852.16	2057	1124.99	1466.77	1283.92	1272.63	1232.7	1491.78
Cyb5r3	3316.56	-0.672628	0.0967738	-6.95052	3.63933e-12	1.69027e-10	4002.19	4380.24	3717.94	4029.1	3942.33	4382.77	2137.48	3085.31	2461.22	2356.15	2268.25	3035.66
Timp2	15791.7	0.38187	0.0549871	6.94471	3.79226e-12	1.75616e-10	13405.1	14773.8	13089.2	12817.4	14200.5	13989.7	16914.2	17684.8	18145	17185.4	17444.3	19851.4
Adamts18	122.881	1.1432	0.164644	6.94351	3.82484e-12	1.7661e-10	73.6761	82.646	85.4183	61.1361	98.8936	56.0311	144.174	152.789	155.974	163.018	166.898	233.921
Tap1	235.222	-0.712214	0.102684	-6.93595	4.03487e-12	1.85768e-10	274.97	251.045	332.682	283.342	282.433	329.539	166.018	195.569	171.836	199.969	174.706	160.555
Fbxl2	1463.25	-0.394664	0.0570257	-6.9208	4.49103e-12	2.06172e-10	1639.29	1664.11	1688.13	1761.19	1616.66	1605.91	1238.58	1296.67	1311.24	1342.18	1290.29	1104.75
Stmn1	28118.7	0.418044	0.0604702	6.91323	4.73754e-12	2.16862e-10	25666.9	22097.6	24850	23599.7	25318.4	22912	31615.5	29030.8	34806.9	30831.1	32254.3	34441.7
Cish	455.631	0.751008	0.108692	6.90951	4.86327e-12	2.21977e-10	256.551	354.819	359.656	316.262	349.48	397.915	463.103	611.154	622.135	591.212	616.84	528.45
Mapk14	1710.14	0.430273	0.0622906	6.90751	4.93248e-12	2.24492e-10	1344.59	1604.45	1430.76	1372.03	1395.41	1586.91	1956.17	1877.26	1980.08	2013.82	1860.28	2099.98
Snrpn	8640.73	-0.31109	0.0450724	-6.90201	5.12716e-12	2.32685e-10	9801.56	9611.17	9221.8	9545.46	9774.54	9457.85	7750.42	8028.53	8032.24	7590.12	6958.97	7916.11
Ramp3	626.947	-1.00327	0.145432	-6.89858	5.25238e-12	2.37689e-10	652.56	897.921	820.465	767.728	723.264	1156.71	379.002	546.983	447.655	418.413	389.429	323.237
Exoc6b	2846.84	-0.63768	0.0924923	-6.89442	5.40867e-12	2.44066e-10	2958.89	4016.72	3378.52	3492.99	3503.18	3442.59	1864.43	2678.89	2314.06	2200.74	2027.18	2283.92
Ntn4	163.326	-1.24895	0.181446	-6.88332	5.84738e-12	2.63116e-10	205.241	210.033	219.165	230.436	280.757	233.621	87.378	114.082	108.389	71.7279	56.6087	142.479
Aebp2	944.12	-0.7023	0.102044	-6.88235	5.8874e-12	2.64168e-10	1086.72	1278.84	1023.9	1205.09	1123.87	1296.31	608.369	842.374	658.264	689.023	649.048	867.636
Nme1	2765.73	-0.670821	0.0975117	-6.87939	6.01087e-12	2.68948e-10	3662.76	2880.8	3515.64	3806.9	3700.13	2821.5	2341.73	1939.4	2299.08	2194.22	2236.04	1790.56
Gpx7	140.571	-0.831659	0.120945	-6.87635	6.14057e-12	2.7398e-10	180.243	173.992	160.721	164.597	207.844	192.785	97.208	110.008	120.726	103.245	94.6732	80.8092
Lgmn	1663.19	-0.463884	0.0674843	-6.87395	6.24486e-12	2.77853e-10	2095.82	1828.15	1854.48	1904.62	2051.62	1837.63	1295.38	1415.84	1413.46	1570.41	1441.57	1249.35
Kdm2a	2649.25	-0.507692	0.0739094	-6.86911	6.46033e-12	2.86637e-10	2699.7	3426.39	3104.28	3054.45	3313.77	3060.82	1979.11	2529.16	2149.27	2087.72	2185.29	2200.99
Nelfcd	1424.92	0.413037	0.0601905	6.86217	6.78244e-12	3.0009e-10	1244.6	1275.11	1114.93	1127.49	1243.71	1322.9	1641.61	1610.39	1603.8	1587.8	1549.91	1776.74
Sfrp1	2376.11	-0.35226	0.0513696	-6.85735	7.01496e-12	3.09516e-10	2802.32	2639.08	2523.21	2607.69	2828.52	2586.93	2028.26	2172.65	2076.13	2180.09	1922.74	2145.7
4931406C07Rik	405.147	-0.662379	0.0967377	-6.84717	7.53257e-12	3.31433e-10	532.836	498.362	511.386	430.304	506.201	499.531	316.745	319.837	326.929	328.21	235.219	356.199
Kit	3176.4	-1.20702	0.176301	-6.84638	7.57399e-12	3.32335e-10	3568.03	5545.36	3539.24	5327.07	3147	5469.2	1461.4	2764.45	1778.28	1952.96	2083.79	1480.08
Ppp2r2b	8563.9	0.250177	0.0365571	6.84346	7.73016e-12	3.38253e-10	7847.82	7838.94	7759.57	7692.56	7791.64	8008.64	9428.08	9006.37	9289.72	8851.88	9872.36	9379.19
Ncoa7	2021.74	-0.536058	0.0783935	-6.83805	8.02809e-12	3.50325e-10	2255.02	2676.99	2341.13	2360.79	2394.4	2326.71	1603.39	1874.21	1701.62	1730.17	1342.02	1654.46
Abcg1	832.239	0.684484	0.100173	6.83303	8.31408e-12	3.6181e-10	719.658	637.555	700.205	473.805	609.285	690.417	1020.14	982.94	964.045	923.769	1102.89	1162.16
Npr2	553.584	-0.582078	0.0852052	-6.83148	8.40414e-12	3.6473e-10	717.027	627.613	649.628	634.875	688.065	667.624	373.541	511.332	482.903	474.926	405.045	410.426
Bid	873.462	-0.520147	0.0763386	-6.81368	9.51323e-12	4.11739e-10	1057.78	972.489	1140.78	957.015	1142.3	906.943	699.024	715.05	761.366	744.449	737.865	646.474
Fzr1	3140.72	-0.373525	0.0548746	-6.80689	9.97332e-12	4.30479e-10	3506.19	3421.42	3810.1	3425.97	3532.51	3576.49	2544.88	3024.19	2736.16	2765.87	2798.23	2546.55
Ube2d1	2721.68	0.393961	0.0580276	6.7892	1.12756e-11	4.8537e-10	2451.05	2256.92	2210.76	2432.51	2468.15	2296.32	3204.59	2722.69	3079.83	3215.8	3040.28	3281.28
Nrxn2	17020	-0.640943	0.0944209	-6.78814	1.13586e-11	4.8762e-10	21755.5	17737.2	22308.8	20499.4	21163.2	20976.5	10890.6	16329	12020.6	12464.4	14075.1	14019.3
Ryk	985.396	0.521094	0.0768124	6.78398	1.16907e-11	5.00526e-10	830.172	786.691	849.687	778.309	817.967	793.932	1224.38	1025.72	1138.52	1059.62	1132.17	1387.58
Nefh	384.296	-1.17395	0.173209	-6.77766	1.22135e-11	5.21502e-10	439.425	664.275	419.224	504.373	512.906	653.379	180.217	347.339	200.916	285.825	182.514	221.162
Man1b1	2783.71	0.319579	0.0471718	6.77478	1.24592e-11	5.30567e-10	2377.37	2605.52	2443.41	2441.92	2373.45	2614.47	2982.86	3137.26	3206.73	3008.23	3240.36	2972.93
Tmem19	1307.7	0.39328	0.0581394	6.76443	1.33839e-11	5.68421e-10	1124.88	1181.28	1050.87	1129.84	1161.58	1131.07	1472.32	1407.69	1530.66	1438.91	1403.51	1659.78
Tspan5	5626.93	0.266354	0.0393895	6.76205	1.36048e-11	5.76263e-10	4767.9	5427.92	5154.32	4960.25	5150.01	5181.45	6175.44	6111.54	6162.31	6128.39	6262.09	6041.55
Cndp2	1765.21	-0.383061	0.0567482	-6.75019	1.47649e-11	6.2374e-10	1970.84	2081.06	1881.45	1961.06	2029.83	2063.65	1405.69	1684.75	1594.99	1437.82	1562.6	1508.79
Atl1	4029.89	0.24901	0.0369902	6.73179	1.67589e-11	7.04227e-10	3806.16	3575.53	3732.55	3574.11	3694.26	3719.89	4527.27	4275.02	4468.62	4461.26	4296.41	4227.6
Erich3	340.574	0.674654	0.100214	6.73212	1.67209e-11	7.04227e-10	280.232	306.971	227.033	218.679	259.805	277.306	399.754	407.436	379.802	399.938	456.774	473.159
Mcfd2	1225.49	-0.407033	0.0604734	-6.73078	1.6876e-11	7.0728e-10	1361.69	1381.99	1477.96	1414.36	1394.57	1355.19	1014.68	1112.3	1127.07	1087.87	1064.83	913.357
Miga1	2453.24	0.430965	0.064048	6.72878	1.71086e-11	7.15138e-10	2295.8	2127.05	1936.52	2092.74	1997.15	2088.34	3072.43	2575	2582.83	2861.51	2797.25	3012.27
Larp1	5627.38	-0.660749	0.0982677	-6.72397	1.76839e-11	7.37246e-10	6144.06	8108.01	6168.1	6915.43	6599.05	7426.49	3636.02	5403.62	4224.52	4142.83	4208.56	4551.9
Entpd1	90.3801	0.919166	0.137118	6.70346	2.03541e-11	8.46348e-10	56.5727	60.2757	67.4355	51.7305	60.3419	77.8737	120.145	97.7847	116.32	129.328	118.097	128.657
Abcb9	1225.85	-0.507276	0.0757456	-6.6971	2.12596e-11	8.81691e-10	1474.84	1237.2	1520.67	1427.29	1613.31	1364.69	953.512	1019.61	964.926	969.414	1142.91	1021.81
Abcd1	591.838	-0.487931	0.0729846	-6.68539	2.30308e-11	9.5266e-10	656.507	706.53	657.496	684.254	700.636	739.8	408.492	497.072	528.726	493.401	500.694	528.45
Them6	233.02	-0.573989	0.0861304	-6.66419	2.66137e-11	1.09801e-09	305.23	282.736	280.981	246.896	265.672	291.551	173.664	180.29	188.579	189.101	187.394	204.15
Chl1	33606.8	-0.544104	0.081679	-6.66149	2.71066e-11	1.11544e-09	39483.8	41120.4	40522	38670.9	42252.7	37168.5	26182.8	29461.7	27644.5	28331.5	21372.7	31070.1
Npbwr1	89.3767	-0.992619	0.149257	-6.65039	2.92325e-11	1.19982e-09	96.0421	133.601	125.88	141.083	115.655	100.666	53.519	69.2641	53.7539	69.5544	62.4648	51.0374
Kctd12	1822.25	0.9596	0.144373	6.64666	2.99816e-11	1.22739e-09	1418.27	1276.97	942.973	1369.68	1157.39	1260.22	2647.55	2074.87	1843.49	3109.3	1835.88	2930.4
Agap2	21160.3	0.526104	0.0792089	6.64199	3.09478e-11	1.26369e-09	17465.2	17588.7	17856.9	15748.4	17179	18226.2	22176.5	25822.3	22286.7	22679.1	27936.4	28958.4
Rhobtb2	3026.22	0.395025	0.0595958	6.6284	3.39337e-11	1.38206e-09	2378.69	2737.26	2708.66	2558.31	2579.61	2719.88	3103.01	3340.98	3392.66	3388.6	3684.45	3722.54
Smarca1	2628.97	-0.415676	0.0627514	-6.62418	3.49191e-11	1.41856e-09	3169.39	2860.3	3120.01	3052.1	3066.54	2764.52	2215.03	2130.89	2266.47	2565.9	2064.27	2272.23
Slc5a3	1296.28	-0.80347	0.121449	-6.61568	3.6984e-11	1.49861e-09	1465.63	1858.6	1563.38	1575.43	1682.03	1741.71	862.857	1149.99	936.727	1192.21	691.017	835.738
Tnrc6a	3557.17	0.323568	0.0489347	6.61223	3.78568e-11	1.53007e-09	3206.23	3427.63	2953.67	3015.65	3191.41	3156.73	3973.51	3807.49	3833.27	3934.17	3983.11	4203.14
Clock	1789.96	-0.455905	0.0690983	-6.59792	4.16978e-11	1.68103e-09	1986.62	2259.41	1954.5	2093.91	1988.77	2134.88	1713.7	1439.27	1450.47	1438.91	1374.23	1644.89
Lhfpl5	95.0891	-1.05562	0.160068	-6.59482	4.2578e-11	1.71218e-09	115.777	130.494	123.632	131.678	136.607	131.056	66.6257	88.6173	52.8726	69.5544	40.9925	53.164
Clns1a	2200.77	0.290517	0.0440555	6.59434	4.27148e-11	1.71334e-09	1920.84	1948.08	1956.75	2013.96	2073.41	1965.84	2528.5	2290.81	2516.74	2336.59	2453.69	2404.07
Tet1	1677.78	-0.622005	0.0943991	-6.5891	4.42499e-11	1.77044e-09	1870.85	1954.3	2047.79	1942.25	2245.22	2141.53	1206.91	1482.05	1310.36	1408.48	1017	1506.67
Mapk9	6764.19	-0.370148	0.0562131	-6.58473	4.55723e-11	1.81877e-09	7332.09	8306.86	7112.19	7681.98	7421.21	7904.18	5653.35	6449.71	6012.5	5954.51	5450.05	5891.63
1700037H04Rik	2470.68	0.395461	0.060106	6.57939	4.72393e-11	1.88057e-09	1987.94	2124.56	2227.62	2138.59	2054.98	2271.63	2550.34	2896.87	2853.36	2655.02	3117.38	2769.84
Celf6	2366.67	-0.533671	0.0811788	-6.57402	4.89755e-11	1.94482e-09	2633.92	2870.86	2831.17	2909.84	2686.89	2864.23	1688.58	2242.94	1876.98	2068.16	2096.47	1630.01
Efr3a	1887.59	-0.551751	0.0839589	-6.57168	4.97512e-11	1.97069e-09	1936.63	2497.4	2202.89	2204.43	2287.96	2331.46	1400.23	1841.61	1439.9	1593.23	1382.03	1533.25
Dennd5b	2844.9	-0.923472	0.140656	-6.56547	5.18692e-11	2.04948e-09	2798.38	4831.37	3245.89	3816.3	3495.64	4163.39	1623.05	2650.37	1818.82	2106.19	1953	1636.39
Cald1	421.892	-0.603089	0.0919342	-6.56001	5.38051e-11	2.12069e-09	569.674	523.839	456.313	500.846	440.831	561.26	309.1	364.655	299.612	367.334	316.228	353.009
Nceh1	2729.41	-0.540123	0.0823923	-6.5555	5.5455e-11	2.18031e-09	3068.08	3466.78	3099.78	3026.24	3209.01	3533.76	2188.82	2573.98	2225.94	2476.79	1943.24	1940.48
Pitpnc1	3948.97	-0.505323	0.0772088	-6.54489	5.95408e-11	2.33518e-09	4581.08	5176.87	4354.08	4658.1	4553.3	4475.84	2896.58	3806.47	3248.14	3572.27	3128.12	2936.78
Miga2	2325.9	-0.435681	0.0666742	-6.53448	6.38312e-11	2.49728e-09	2727.33	2673.88	2679.44	3012.13	2437.14	2520.45	1920.13	2078.94	1887.55	1851.89	2204.81	1917.09
Mid2	1363.08	-0.774607	0.118706	-6.52545	6.77987e-11	2.64598e-09	1510.36	2080.44	1450.99	1667.13	1652.7	1958.24	904.362	1300.74	949.945	1093.31	840.347	948.445
Spring1	2587.68	-0.380225	0.0582799	-6.52411	6.84082e-11	2.66323e-09	2623.4	3108.86	2907.59	2985.09	2940.83	2990.54	2177.9	2510.82	2274.4	2163.79	2236.04	2132.94
Stk24	1423.3	0.377251	0.0578534	6.5208	6.99324e-11	2.71591e-09	1159.08	1327.31	1187.99	1267.4	1192.59	1288.71	1592.46	1586.96	1544.76	1689.95	1505.01	1737.4
Has3	1229.62	0.472871	0.0725235	6.52024	7.01932e-11	2.71939e-09	922.267	1054.51	1102.57	961.718	1142.3	992.414	1355.45	1361.86	1535.07	1497.59	1531.36	1298.26
Gorasp2	3614.49	-0.56968	0.0874216	-6.51646	7.19846e-11	2.782e-09	3795.64	4889.16	3883.16	4611.07	4151.02	4581.25	2530.68	3381.72	2958.22	3108.21	2813.84	2669.89
Cbfa2t3	486.82	-0.595326	0.0913999	-6.51342	7.34592e-11	2.8321e-09	613.091	536.267	626.026	577.266	679.684	483.387	384.463	419.659	345.435	382.549	395.285	398.73
Kdm1b	1206.79	0.48968	0.0752828	6.50454	7.79302e-11	2.9972e-09	978.84	1034.01	973.319	975.826	1056.82	1000.96	1506.18	1323.15	1331.51	1360.66	1258.08	1682.11
Lynx1	1101.17	-1.08421	0.166922	-6.49528	8.28777e-11	3.17978e-09	1198.55	1744.89	1339.72	1359.1	1474.19	1861.37	554.85	1130.64	662.67	732.494	572.919	582.677
Zc3hav1l	388.775	0.812214	0.125116	6.49171	8.4867e-11	3.24826e-09	293.389	298.271	309.079	202.219	323.499	264.011	524.268	409.473	487.31	554.261	415.781	583.74
Eny2	2647.5	0.545067	0.0839715	6.4911	8.52134e-11	3.25368e-09	2422.1	2059.94	1967.99	2222.06	2128.73	2120.63	3745.24	2655.46	2957.34	3369.04	3114.46	3006.95
Pck2	452.642	-0.533981	0.0823803	-6.4819	9.05773e-11	3.45019e-09	471.001	550.559	590.06	556.103	552.296	491.934	336.405	408.455	381.564	399.938	355.268	338.123
Frem3	122.356	-1.54157	0.237861	-6.48095	9.11447e-11	3.4635e-09	153.93	239.238	138.243	149.313	197.787	213.678	43.689	119.175	60.8035	63.0336	46.8486	42.5312
Irf2	338.039	-0.637464	0.098563	-6.46758	9.95871e-11	3.77528e-09	426.269	397.074	373.143	432.655	430.774	410.261	223.906	319.837	278.463	293.433	242.051	228.605
Cbx1	1785.42	0.423757	0.0656887	6.45099	1.11121e-10	4.20248e-09	1655.08	1509.38	1421.76	1526.05	1556.32	1482.45	2194.28	1789.66	1971.27	2108.37	1975.45	2235.01
Ap3s2	4920.23	0.241716	0.0375045	6.44498	1.15613e-10	4.36197e-09	4587.65	4508.25	4635.06	4546.41	4388.19	4393.21	5442.55	5084.8	5420.33	5135.07	5381.73	5519.48
Gmds	501.092	-0.465353	0.0722216	-6.4434	1.16825e-10	4.39727e-09	590.725	578.522	566.458	614.888	590.009	548.914	370.264	445.124	450.299	449.93	429.445	378.527
Srl	857.308	0.577606	0.0896551	6.44253	1.175e-10	4.41221e-09	614.406	722.065	726.055	591.374	721.588	748.347	973.172	935.066	1108.56	955.286	971.132	1220.64
Ube2v2	1339.14	-0.875472	0.136004	-6.4371	1.21777e-10	4.55132e-09	2012.94	1515.59	1655.54	1884.64	1600.74	1731.26	1114.07	871.913	853.012	1103.09	605.128	1121.76
Creg1	885.38	-0.417195	0.0648096	-6.43724	1.21666e-10	4.55132e-09	1114.35	952.604	1000.29	1032.26	948.708	1032.3	760.188	783.296	766.653	774.879	794.474	664.55
1600012H06Rik	1032.32	0.58867	0.0916724	6.42145	1.34983e-10	5.03301e-09	910.426	789.798	832.828	839.445	742.54	834.768	1505.09	1011.46	1138.52	1253.07	1220.99	1308.9
Slc35f1	8785.58	0.302782	0.0471846	6.41695	1.39029e-10	5.17174e-09	8204.36	8244.72	7558.39	7903.01	8028.82	7260.3	10131.5	9457.61	9499.45	10181	9673.26	9284.56
Stk11ip	1586.24	0.47818	0.0745749	6.41207	1.4356e-10	5.3154e-09	1324.85	1409.95	1299.26	1381.44	1288.13	1250.73	1806.54	1864.02	1809.13	1763.86	2216.52	1620.44
Klhl2	5292.18	0.302294	0.0471428	6.41231	1.4333e-10	5.3154e-09	4766.58	4929.56	4532.79	4902.64	4472	4832.92	5778.96	5787.63	5555.15	5727.37	5871.69	6348.84
Mt1	976.663	-0.750445	0.117048	-6.41142	1.44169e-10	5.32553e-09	1202.5	1160.77	1292.51	1088.69	1304.89	1300.11	703.393	856.634	634.472	629.25	586.583	960.141
Tmcc1	2829.98	0.380694	0.059402	6.40877	1.46694e-10	5.40625e-09	2315.54	2438.37	2603.01	2472.48	2656.72	2264.98	3132.5	2902.98	3348.6	3214.72	3181.8	3428.01
Pdxdc1	2438.85	-0.332448	0.0518878	-6.40705	1.48365e-10	5.45516e-09	2548.4	2719.86	2758.11	2811.08	2803.38	2671.45	2087.24	2235.81	2336.97	2171.4	2150.15	1972.38
Trim36	463.064	-0.532001	0.0830821	-6.40331	1.52043e-10	5.57748e-09	526.258	605.242	518.129	579.617	525.477	528.971	360.434	416.603	415.931	372.768	318.18	389.16
Klhl8	2476.7	0.391242	0.061145	6.39859	1.56815e-10	5.7393e-09	2226.07	2057.45	2223.12	2065.69	2307.24	1980.08	2912.96	2503.69	2955.58	2927.8	2881.19	2679.46
Eif4e2	3353.06	0.332541	0.0519992	6.39513	1.60416e-10	5.85758e-09	2835.22	3229.41	2789.58	2883.98	2931.61	3132.04	3621.82	3742.3	3791.85	3552.71	3765.46	3960.72
Glis2	486.102	0.501312	0.0784698	6.38861	1.67405e-10	6.09876e-09	382.853	381.539	445.074	385.628	445.859	374.173	537.374	541.89	556.925	539.046	631.48	611.386
Galt	642.004	-0.391674	0.0613344	-6.38589	1.70408e-10	6.19396e-09	801.228	678.567	714.816	725.403	719.074	736.951	567.957	571.429	552.519	531.439	524.119	580.551
Hibadh	942.561	-0.421516	0.0661083	-6.37614	1.81609e-10	6.58602e-09	1149.87	1016.61	1058.74	1033.43	1128.06	1091.18	889.071	768.017	860.943	817.264	779.834	717.714
Man1c1	350.497	-0.648064	0.101669	-6.37428	1.83823e-10	6.65113e-09	392.062	453.621	452.942	395.033	418.203	453.947	234.828	304.558	277.581	278.217	219.603	325.363
Lrch1	487.073	0.421688	0.0662079	6.36915	1.90082e-10	6.86197e-09	399.956	457.349	401.241	416.196	425.745	392.217	549.389	532.723	548.994	578.171	548.519	594.373
Mmp24	10321.7	0.388207	0.060983	6.36583	1.94236e-10	6.99602e-09	7950.44	9266.3	9614.05	8347.43	9073.91	9390.43	10600	11957.2	11996.8	11829.7	11430.1	12404.2
Rassf4	63.0684	-1.56745	0.246301	-6.36399	1.96585e-10	7.06459e-09	89.4639	86.9958	73.0551	124.624	137.445	55.0814	24.0289	30.5577	46.7042	26.0829	35.1364	27.6453
Gle1	2291.07	0.281074	0.0442169	6.35672	2.06108e-10	7.39011e-09	1998.47	2174.9	2105.11	1995.15	2106.1	2025.67	2445.49	2466.01	2544.94	2410.49	2582.53	2638
Ivd	1693.18	-0.455613	0.0719469	-6.33262	2.41027e-10	8.62268e-09	1934	2018.3	2021.94	1850.54	1819.47	2105.44	1417.71	1553.35	1464.57	1230.24	1321.52	1581.1
Pfkfb3	2164.96	-1.04374	0.165119	-6.32114	2.59647e-10	9.25057e-09	2126.08	2427.18	3848.32	2369.02	4307.74	2415.03	1253.87	1585.94	1585.3	1407.39	1180.97	1472.64
Selenom	1801.28	-0.531606	0.0841005	-6.32108	2.59743e-10	9.25057e-09	2297.12	1784.04	2404.07	2041	2054.98	2199.46	1555.33	1596.13	1392.31	1439.99	1578.21	1272.75
Psen2	608.503	-0.434345	0.068726	-6.31996	2.61638e-10	9.27811e-09	693.345	684.16	750.781	653.686	713.207	701.813	489.317	566.336	524.32	556.435	511.43	457.21
Gadd45a	43.3112	-1.49743	0.236938	-6.31993	2.61684e-10	9.27811e-09	55.2571	46.6049	83.1704	82.2986	67.0465	50.333	15.2911	26.4833	28.1987	28.2565	16.5922	20.2023
Nsg2	45600.6	0.288326	0.0456844	6.31126	2.7678e-10	9.79149e-09	43225.5	40045.4	40845.7	40287.5	41514.4	40439.2	51531.1	47407.2	49706.5	46863.3	51385.1	53956.1
Tpp1	1324.03	0.3574	0.0567615	6.29651	3.04422e-10	1.07454e-08	1080.14	1281.32	1089.08	1178.05	1108.78	1220.34	1487.61	1510.57	1462.81	1432.39	1515.75	1521.55
Tnpo3	3227.63	-0.550883	0.0877436	-6.27833	3.42228e-10	1.20531e-08	3385.16	4382.1	3780.88	3684.62	3804.05	3979.15	2270.73	3145.41	2783.74	2601.77	2336.57	2577.39
Acsl6	3333.76	-0.363562	0.0579361	-6.27523	3.49129e-10	1.22689e-08	3702.23	3986.27	3668.49	3467.12	3638.95	4042.78	2770.97	3239.12	2907.11	2946.28	2778.71	2857.03
Sdhaf1	110.927	-0.962189	0.153593	-6.26455	3.73913e-10	1.31109e-08	164.456	106.881	147.234	157.543	169.292	135.804	96.1158	75.3757	82.8338	67.3808	64.4168	63.7968
Lhfp	803.535	0.661018	0.105693	6.25411	3.99794e-10	1.39875e-08	595.987	591.571	600.176	683.078	714.883	549.864	1085.67	927.936	905.003	1030.27	1183.9	774.067
Pla2g15	1445.63	0.480309	0.0768287	6.25169	4.06041e-10	1.41749e-08	1153.82	1211.73	1283.52	1135.72	1284.78	1172.85	1655.81	1580.85	1848.78	1774.72	1845.64	1399.28
Nop10	1860.61	-0.872756	0.139625	-6.25069	4.08641e-10	1.42343e-08	2839.16	1792.11	2549.06	2755.83	2445.52	2061.75	1620.86	1057.3	1412.58	1476.94	1350.8	965.458
Slc22a21	129.286	-0.889351	0.142382	-6.24622	4.20509e-10	1.46157e-08	117.092	170.885	182.076	171.651	178.511	186.137	72.0868	112.045	84.5962	99.9844	96.6252	79.7459
Etfdh	1406.1	0.330999	0.0531061	6.23278	4.58226e-10	1.58918e-08	1222.23	1317.99	1235.19	1239.18	1242.87	1211.79	1663.46	1506.49	1596.75	1606.27	1610.42	1420.54
Ttc9c	1588.86	-0.478714	0.0769826	-6.21847	5.02016e-10	1.73726e-08	1905.05	1801.43	1888.19	2024.54	1977.03	1505.24	1374.02	1329.26	1301.55	1457.38	1264.91	1237.66
Elavl3	14617.5	-0.570689	0.0918746	-6.21161	5.24433e-10	1.81089e-08	16750.8	18497.2	16548.7	17144	17670.1	18216.7	9822.37	13986.3	11653.1	11546	9895.79	13679.1
Ppp2r5e	3619.33	-0.735688	0.11847	-6.20992	5.30106e-10	1.82651e-08	3881.15	5452.15	3964.08	4747.45	4339.59	4749.34	2174.62	3454.04	2630.41	3126.69	2555.2	2357.29
Dlx6os1	3237.84	-0.829891	0.133675	-6.20829	5.35649e-10	1.84161e-08	4700.8	3921.65	3824.71	4855.62	3629.73	3933.57	3048.4	2262.29	1949.24	2573.51	2541.54	1612.99
Asah2	74.1968	-1.15808	0.186726	-6.20203	5.57406e-10	1.91228e-08	119.724	103.152	85.4183	118.745	109.789	77.8737	60.0723	50.9295	45.823	52.1658	27.3283	39.3413
Phc2	2202.1	0.355534	0.0573959	6.19442	5.85009e-10	2.00265e-08	1881.37	1996.55	1889.32	1801.16	1948.54	2071.25	2351.56	2503.69	2338.73	2348.55	2718.19	2576.33
Plin2	128.325	-0.991181	0.160288	-6.18373	6.26024e-10	2.13845e-08	177.612	156.592	165.217	146.962	194.435	183.288	79.7324	124.268	80.1902	102.158	62.4648	66.9866
Dnase1	230.702	-0.628787	0.101694	-6.18312	6.28475e-10	2.14221e-08	299.967	270.93	261.874	280.991	326.852	241.218	195.508	188.439	194.748	153.237	171.778	182.884
Ncbp1	2839.09	0.257807	0.041703	6.18197	6.33053e-10	2.15319e-08	2639.18	2568.86	2507.48	2652.37	2629.06	2521.4	3232.98	2936.6	3123.89	3135.38	3168.14	2953.79
Atxn7l3	6519.85	-0.329151	0.0532555	-6.18061	6.38556e-10	2.16727e-08	7104.48	7243.64	7599.98	7164.68	7353.33	7096.95	5251.42	6077.93	5927.9	5504.58	5573.03	6340.33
Setmar	150.253	0.674261	0.109144	6.17771	6.50373e-10	2.20267e-08	111.83	104.395	120.26	131.678	108.951	119.66	209.707	162.974	182.411	190.188	196.178	164.808
Slc6a9	1029.68	-0.77206	0.125085	-6.17229	6.73072e-10	2.26987e-08	1123.56	1423.62	1320.61	1282.68	1222.76	1418.82	645.505	932.01	767.535	887.905	810.09	521.007
Marcksl1	24474.8	-0.408506	0.0661833	-6.17234	6.72857e-10	2.26987e-08	27153.6	28617.9	27387.8	29422.9	27885.5	27034.5	18294.8	24498.1	21274.2	20718.5	21544.5	19865.2
Slc22a5	444.948	-0.520367	0.0843545	-6.16882	6.8802e-10	2.31536e-08	511.786	488.419	541.732	520.832	527.991	557.462	388.832	340.209	428.268	369.508	359.172	305.161
N4bp3	551.952	-0.917688	0.148809	-6.16688	6.96503e-10	2.33895e-08	743.34	479.098	884.528	656.037	830.539	738.85	309.1	465.496	379.802	455.364	371.861	309.414
Rnf145	2450.14	0.412876	0.0669709	6.16501	7.04783e-10	2.36177e-08	2194.5	2106.54	2206.26	1849.37	2117.83	2136.78	2944.64	2503.69	2825.16	2556.12	2936.82	3023.97
Mapkap1	2363.68	0.258848	0.0419924	6.16417	7.0853e-10	2.36932e-08	2169.5	2265	2084.88	2199.72	2093.53	2098.79	2641	2577.03	2633.06	2440.92	2597.17	2563.57
Tex261	1494.33	0.342209	0.0555293	6.16267	7.15279e-10	2.38687e-08	1336.7	1365.83	1308.25	1334.41	1235.33	1327.65	1650.35	1598.17	1705.14	1537.8	1687.53	1844.79
Tmtc4	774.213	0.475416	0.0771584	6.16156	7.20312e-10	2.39862e-08	626.247	684.16	673.231	594.901	631.075	673.322	984.094	845.43	860.062	888.992	794.474	1034.57
Gm3693	359.208	0.60687	0.0985003	6.1611	7.22414e-10	2.40059e-08	321.017	260.366	295.592	318.613	263.158	254.514	481.671	355.488	439.724	402.111	456.774	461.463
Cox6a2	393.696	-1.28655	0.208887	-6.15909	7.3162e-10	2.42611e-08	448.635	554.909	597.928	609.009	515.42	624.889	199.877	371.785	207.966	259.742	234.243	99.9483
Nptx1	1015.23	0.632873	0.102806	6.15601	7.45993e-10	2.46862e-08	761.759	843.238	757.525	985.231	702.312	727.454	1057.27	1282.41	1139.41	1135.69	1481.59	1308.9
Gosr1	1454.24	-0.449663	0.0733139	-6.13339	8.60245e-10	2.84078e-08	1665.61	1825.67	1525.17	1792.93	1532.85	1729.37	1174.14	1324.17	1135	1309.58	1113.63	1322.72
1700003E16Rik	269.992	-0.707011	0.115426	-6.12524	9.0549e-10	2.98398e-08	356.54	282.736	345.045	309.207	388.87	326.69	226.09	205.755	188.579	193.448	164.946	251.997
Kcnk3	726.629	-0.670716	0.109521	-6.12409	9.12037e-10	2.99934e-08	813.069	950.74	869.917	926.447	899.261	895.547	434.705	694.678	561.331	616.208	610.008	447.641
Ppp1r8	1899.28	-0.353553	0.0577968	-6.11718	9.5248e-10	3.12587e-08	2205.02	1966.11	2272.58	2019.84	2164.76	2160.52	1635.06	1542.15	1750.08	1808.41	1635.8	1631.07
Camta1	10139.5	0.45818	0.0749957	6.10942	9.9991e-10	3.27476e-08	8447.76	9129.59	8084.39	7945.34	8875.28	8769.34	11856.1	11354.2	11064.5	11678.6	10314.5	14154.4
Arpc5	7732.43	0.268956	0.0440497	6.10575	1.02319e-09	3.3441e-08	6993.97	7286.52	6673.86	7030.65	7334.89	6756.02	8683.18	8104.92	8456.98	8672.56	7978.9	8816.71
Eea1	1324.63	-0.498116	0.0816499	-6.10063	1.05654e-09	3.44602e-08	1495.89	1796.46	1433	1581.31	1426.41	1568.87	1072.56	1213.14	969.332	1145.47	991.628	1201.51
Dcun1d4	3303.83	0.373565	0.061288	6.09524	1.09274e-09	3.55679e-08	2791.8	3142.41	2712.03	2796.98	2877.13	2943.05	3952.76	3712.76	3606.8	3686.38	3329.18	4094.69
Slc2a6	1231.43	-0.350183	0.0574593	-6.09445	1.09812e-09	3.56698e-08	1497.2	1294.99	1415.02	1427.29	1329.2	1323.85	1049.63	1091.93	1040.71	1074.83	1181.95	1050.52
Lrrfip1	2147.97	-0.412344	0.0676745	-6.09306	1.10774e-09	3.59088e-08	2272.12	2632.87	2300.67	2584.18	2383.5	2542.29	1642.71	1931.25	1884.91	1673.65	1976.42	1951.12
Ndufaf3	905.308	-0.489118	0.080318	-6.08976	1.13077e-09	3.65808e-08	1111.72	1011.02	1020.52	1127.49	1085.32	990.515	711.038	807.742	741.098	771.619	865.723	619.892
Tspan17	1077.14	-0.532338	0.0874284	-6.08884	1.13734e-09	3.67184e-08	1349.85	1087.45	1353.2	1208.61	1403.79	1242.18	849.751	967.661	973.738	765.098	787.642	936.749
Mapk8	11961.6	0.393965	0.0647185	6.08736	1.14789e-09	3.69839e-08	10696.2	10011.4	10733.5	10747	10631.1	9214.73	14819.3	11952.1	13422.6	14067.4	14342.5	12901.8
Nedd4	30377.2	0.419374	0.0689284	6.08421	1.1707e-09	3.76426e-08	25238	28821.7	24992.7	23940.7	26115.5	26842.7	34638.8	33888.5	35256.4	31966.8	32300.1	40524.8
Syn2	6667.7	-0.759877	0.124939	-6.08197	1.18711e-09	3.79398e-08	9497.64	7684.22	8345.14	7487.99	8337.23	8953.57	4767.56	4686.53	5244.97	3955.9	4031.91	7019.77
Atl3	857.337	-0.372559	0.061251	-6.08251	1.18319e-09	3.79398e-08	927.53	1012.26	964.327	913.514	1023.3	958.226	776.572	738.478	726.118	719.453	697.849	830.421
Zfp266	3349.71	0.302588	0.0497512	6.08203	1.1867e-09	3.79398e-08	2965.46	3041.12	3042.46	2923.95	3014.58	3006.68	3857.74	3436.72	3577.72	3829.84	3486.32	4013.88
Phyhipl	4627.68	0.364671	0.0600716	6.07061	1.27427e-09	4.05622e-08	3967.99	4408.82	3608.92	4056.14	4075.59	4152	5108.33	5166.29	5285.5	4915.54	4993.28	5793.81
D630013N20Rik	4627.68	0.364671	0.0600716	6.07061	1.27427e-09	4.05622e-08	3967.99	4408.82	3608.92	4056.14	4075.59	4152	5108.33	5166.29	5285.5	4915.54	4993.28	5793.81
Abcd2	277.483	-0.679881	0.112068	-6.06667	1.30589e-09	4.14856e-08	344.699	374.703	287.725	399.736	281.595	361.828	192.232	256.685	210.609	204.316	203.011	212.656
Lcp1	17.9477	-2.24636	0.370725	-6.05938	1.36647e-09	4.33235e-08	28.9442	27.3415	25.8503	16.4597	34.3613	44.6349	10.9222	7.13013	7.04969	4.34715	1.95202	6.37968
Arl5a	5016.68	0.527956	0.0871784	6.05604	1.39512e-09	4.41437e-08	4335.05	4151.56	3815.72	4247.78	4336.23	3765.48	7005.53	5194.81	5266.12	6405.52	5239.23	6437.09
St6galnac5	1521.3	0.845963	0.139755	6.05319	1.42006e-09	4.48024e-08	1093.3	1130.32	1134.04	915.866	1146.5	1104.48	1858.97	1798.83	1909.58	1563.89	1592.85	3006.95
Klf13	3660.14	0.643061	0.106238	6.05302	1.42158e-09	4.48024e-08	2622.08	3371.71	2774.97	2459.55	2807.57	3105.45	3913.44	4699.78	4365.52	3832.01	4241.75	5727.89
Cdkn1a	5296.58	0.457467	0.0756447	6.04758	1.47037e-09	4.62483e-08	3862.73	4788.5	4404.66	4020.87	4693.26	5005.76	5753.84	6603.52	6064.49	6483.77	6306.01	5571.58
Slc6a7	1819.24	-0.526553	0.0870785	-6.04687	1.47683e-09	4.63596e-08	2203.71	2322.17	1906.18	2071.57	2225.11	2154.82	1516.01	1769.29	1470.74	1594.32	1386.91	1210.01
Stradb	2349.44	0.324779	0.0537172	6.04609	1.48402e-09	4.64935e-08	2087.93	2118.35	2165.8	1973.99	2180.69	1988.63	2544.88	2419.15	2806.66	2620.24	2517.14	2769.84
Arhgef2	2549.62	-0.458307	0.0759606	-6.03349	1.60458e-09	5.01716e-08	2491.83	3140.55	3076.18	2866.34	3190.58	2938.31	1911.39	2418.13	2235.63	2206.18	2068.17	2052.13
Vps26a	1663.48	0.350436	0.0580926	6.03238	1.61562e-09	5.04175e-08	1460.37	1497.57	1472.34	1543.69	1433.96	1365.64	1999.86	1713.27	1771.23	2005.12	1788.05	1910.71
Zfp110	1006.33	-0.465751	0.0772272	-6.03091	1.63035e-09	5.07775e-08	1023.57	1222.29	1131.79	1125.14	1174.99	1323.85	763.465	937.103	894.429	872.69	831.562	775.131
H2-K1	1225.95	-0.758238	0.125742	-6.03011	1.63849e-09	5.0931e-08	1348.54	1130.95	1747.7	1337.94	1957.76	1722.72	966.619	863.764	1005.46	991.15	816.922	821.915
Zbtb41	1501.96	-0.586173	0.0972888	-6.02508	1.69023e-09	5.24369e-08	1805.07	1969.83	1630.81	1802.34	1769.19	1837.63	1166.5	1364.91	1079.48	1362.83	916.475	1318.47
Gnaq	11474	0.396994	0.0659463	6.01996	1.74465e-09	5.40196e-08	9633.15	10936.6	9372.41	9683.01	9922.05	9877.61	12927.6	12618.3	12485.9	12473.1	12356.3	15401.6
Dzip1l	719.324	-0.518176	0.0861086	-6.0177	1.76909e-09	5.46698e-08	860.432	763.699	929.485	750.093	921.89	858.51	570.141	550.039	579.837	617.295	698.825	531.64
Dab2ip	3734.25	-0.501791	0.0834318	-6.01439	1.80568e-09	5.5692e-08	4027.19	4656.76	4694.63	4092.59	4552.46	4237.47	2557.99	3514.14	3035.77	2962.58	2951.46	3527.96
Septin8	1773.91	-0.401234	0.0667499	-6.011	1.84381e-09	5.6758e-08	1780.07	2190.43	1943.27	2071.57	1950.22	2174.76	1426.45	1686.79	1553.57	1520.42	1540.15	1449.25
Ykt6	7723.06	0.294724	0.0490977	6.0028	1.93938e-09	5.95845e-08	6825.57	6836.01	7104.33	6830.78	7354.16	6671.49	8623.11	8082.51	9041.22	8388.91	9017.38	7901.23
Ccdc148	568.208	-0.465626	0.0776104	-5.99954	1.97881e-09	6.06785e-08	609.144	718.958	665.363	634.875	702.312	620.14	422.691	530.685	467.042	499.922	440.182	507.184
Itgb1	3926.53	0.522319	0.087115	5.99574	2.02556e-09	6.19922e-08	3336.48	3133.71	3324.57	3462.42	3269.36	2815.8	5349.72	4065.19	4580.53	5076.38	4849.8	3854.39
Fgf9	471.06	-0.506366	0.0844689	-5.99471	2.03854e-09	6.22697e-08	578.884	545.588	555.219	617.239	471.84	551.763	424.875	404.38	419.456	378.202	365.029	340.249
Dcbld2	2012.68	-0.501713	0.0837118	-5.99334	2.05579e-09	6.25558e-08	2265.54	2481.87	2207.39	2434.86	2501.67	2262.14	1700.59	1690.86	1674.3	1869.27	1779.27	1284.44
Gpd1l	6781.49	0.296897	0.0495355	5.99362	2.05215e-09	6.25558e-08	6096.7	6237.6	6518.76	6115.96	5740.02	5810.14	7368.15	7218.75	7660.37	7138.02	7354.25	8119.2
Ptpn4	3069.01	-0.578151	0.0964969	-5.99139	2.08051e-09	6.31871e-08	3969.3	4035.36	3288.6	3575.28	3312.1	3871.84	2684.69	2625.93	2076.13	2755.01	1996.92	2636.93
Mxra7	393.898	-0.629577	0.10517	-5.9863	2.14666e-09	6.50716e-08	592.04	437.465	501.27	431.48	496.982	415.01	317.837	322.893	359.534	296.693	267.427	288.149
Ran	6066.94	0.258898	0.0432527	5.98571	2.15452e-09	6.51856e-08	5630.96	5466.44	5404.95	5742.09	5413.17	5490.09	6759.78	6451.75	6485.71	6784.81	7034.12	6139.37
Gpr45	561.558	-0.499017	0.0833924	-5.98397	2.17766e-09	6.57604e-08	618.353	714.608	685.594	580.793	700.636	644.832	410.676	477.719	499.646	433.628	530.951	441.261
Zdhhc5	2662.24	-0.462541	0.077302	-5.98356	2.1831e-09	6.57809e-08	2783.91	3414.59	2986.27	3116.76	2876.3	3331.47	2039.18	2575	2157.2	2357.24	2288.75	2020.23
Ado	2738.98	0.319362	0.0533756	5.9833	2.18662e-09	6.57809e-08	2406.32	2601.8	2222	2553.61	2329.87	2503.35	3149.98	3037.44	2862.17	3153.86	2931.94	3115.41
Lnx1	568.199	-0.484516	0.0810162	-5.98047	2.22489e-09	6.68056e-08	624.931	682.296	712.568	632.523	632.751	691.366	427.06	554.113	472.329	449.93	515.334	423.185
Tmem35a	6223.33	0.342859	0.0573878	5.97443	2.30896e-09	6.91992e-08	5174.43	5696.98	5476.88	5307.08	5345.28	5920.3	6575.19	6884.65	7564.31	6402.26	6890.65	7441.89
Mrpl44	675.915	0.412234	0.0690497	5.9701	2.37109e-09	7.09272e-08	597.303	559.88	537.236	620.766	518.772	648.631	812.615	735.422	749.91	761.838	781.786	786.827
Fryl	1677.18	-0.546273	0.0916803	-5.95846	2.54623e-09	7.60231e-08	1797.17	2291.1	1869.09	1904.62	1858.03	2223.2	1232.03	1491.22	1342.08	1140.04	1482.56	1494.97
Maoa	1872.48	-0.503763	0.0845632	-5.95724	2.56535e-09	7.64245e-08	2431.31	2030.73	2130.96	2463.08	2162.25	1961.09	1798.89	1503.44	1478.67	1635.61	1548.93	1324.85
Cdk14	4283.12	-0.342294	0.0574609	-5.95699	2.5693e-09	7.64245e-08	4731.06	5135.24	4515.93	4730.99	4575.09	5040.9	3968.05	3743.32	3839.44	3564.66	3457.04	4095.75
Aldh2	1366.95	-0.55773	0.093684	-5.95332	2.62761e-09	7.80129e-08	1753.76	1518.7	1703.87	1404.95	1806.9	1580.27	1029.97	1251.85	1083.01	1208.51	1178.05	883.585
Cnn3	1807.51	0.562197	0.0945147	5.94825	2.71027e-09	8.0317e-08	1449.84	1450.34	1437.5	1432	1475.02	1512.84	2337.36	1908.84	2217.13	1905.14	1825.14	2739.01
Cmas	4389.31	0.346592	0.058277	5.94732	2.72561e-09	8.06213e-08	3962.72	3760.08	3830.33	4090.24	4116.66	3430.24	5218.65	4557.17	5001.75	4677.53	5070.38	4955.94
Zdhhc6	773.296	0.304862	0.0512931	5.94352	2.78967e-09	8.23627e-08	714.395	700.316	653	693.659	675.494	715.108	820.261	882.099	859.18	849.867	867.675	848.497
Ciao2a	702.491	0.45565	0.0766763	5.94251	2.80695e-09	8.2719e-08	624.931	538.753	579.945	573.739	615.99	622.989	950.235	713.013	781.634	806.396	812.042	810.219
Zfp251	2343.67	0.305454	0.0514064	5.94195	2.81659e-09	8.28493e-08	1964.26	2158.74	2155.69	2104.49	1979.55	2212.75	2549.25	2526.1	2448	2573.51	2779.68	2672.02
Aph1a	590.716	-0.440957	0.0742385	-5.93974	2.85469e-09	8.3815e-08	727.552	651.847	627.15	690.132	674.656	712.259	537.374	471.607	503.171	522.745	542.663	427.438
Snn	5256.64	0.507072	0.0853823	5.93884	2.87037e-09	8.41199e-08	4704.75	4180.15	4494.57	3969.14	4589.33	4116.86	6485.63	5246.76	6453.99	5411.11	6073.72	7353.64
Pth1r	126.833	-0.934825	0.15748	-5.93613	2.91826e-09	8.53659e-08	184.19	128.63	169.713	148.137	188.568	181.389	74.2713	92.6917	111.033	89.1165	58.5607	95.6951
Ttc7b	3034.28	-0.592703	0.0998982	-5.93307	2.9733e-09	8.6816e-08	3070.72	4172.69	3394.25	3708.14	3657.39	3887.99	2071.95	3012.99	2412.76	2464.83	2468.33	2089.34
Ric8b	1678.4	0.340452	0.0573975	5.93147	3.0023e-09	8.7502e-08	1510.36	1460.91	1385.8	1574.25	1441.5	1516.64	2026.08	1695.95	1864.64	1872.53	1980.33	1811.83
Mpp2	3882.07	0.295297	0.0498224	5.927	3.08527e-09	8.97555e-08	3474.62	3277.26	3820.22	3233.16	3624.7	3489.12	4255.31	4180.29	4265.06	4221.08	4285.67	4458.33
Zfp597	1090.35	0.350313	0.059158	5.92166	3.18715e-09	9.25496e-08	935.424	1020.34	936.229	960.542	970.498	923.088	1324.87	1141.84	1177.3	1321.53	1161.45	1211.08
C1qtnf1	143.437	0.949519	0.160411	5.91928	3.23362e-09	9.37277e-08	117.092	85.753	92.1618	79.9472	104.76	108.263	227.183	171.123	179.767	127.154	183.49	244.554
Sptlc1	949.363	0.37709	0.0638594	5.90501	3.52632e-09	1.02026e-07	863.063	802.847	836.2	788.891	882.5	783.485	1167.59	978.865	1104.16	1092.22	1105.82	986.723
Acadsb	3088.34	0.338887	0.0574083	5.9031	3.56741e-09	1.03027e-07	2739.17	2695.63	2786.21	2875.75	2712.87	2554.64	3738.68	3222.82	3252.55	3782.02	3329.18	3370.6
Lsm2	282.154	0.556939	0.0943655	5.90193	3.59271e-09	1.03569e-07	247.341	228.675	192.191	231.612	217.063	253.564	345.143	317.8	306.661	330.383	394.309	321.11
Sbk1	18308.9	0.334132	0.0566672	5.89639	3.71551e-09	1.06915e-07	16521.9	15487.1	16776.8	15968.3	17248.6	15189.2	20035.8	19508	19911	19474.1	23194	20392.6
Tle5	10099.4	-0.380981	0.0647615	-5.88283	4.03318e-09	1.15846e-07	11980.3	10976.4	10953.8	11959.2	11385.3	11299.3	8404.67	9524.84	8289.55	8822.54	9862.6	7734.29
Rbpj	548.459	0.460599	0.0783944	5.87541	4.2181e-09	1.20939e-07	424.953	528.81	441.702	412.669	441.669	513.776	590.893	671.251	649.452	642.291	632.456	631.588
Mob1a	1077.08	0.430293	0.0733173	5.86891	4.38663e-09	1.25545e-07	974.893	930.855	919.37	812.404	994.803	871.805	1308.48	1078.69	1252.2	1207.42	1203.42	1370.57
Arl8b	5339.12	-0.383662	0.0653863	-5.86762	4.42088e-09	1.26071e-07	5886.2	6643.37	5528.58	6166.51	5850.65	6190.01	4480.3	4900.44	4659.84	4598.2	4068.99	5096.3
Sigmar1	1084.61	0.324942	0.0553784	5.86767	4.41973e-09	1.26071e-07	924.899	987.402	930.609	915.866	1077.77	935.434	1210.18	1201.94	1233.7	1195.47	1235.63	1166.42
Pgm2l1	13098.8	-0.829317	0.14149	-5.8613	4.59264e-09	1.30734e-07	16764	17188.5	17085.9	15835.4	17570.4	16135	8050.79	10631	9363.75	9125.75	5972.22	13463.2
Ppif	1297.74	0.289906	0.0494889	5.85801	4.68448e-09	1.33109e-07	1131.45	1210.48	1130.67	1252.11	1160.74	1119.67	1420.98	1388.34	1436.37	1468.25	1487.44	1366.31
Rlim	2860.12	-0.545859	0.0934178	-5.8432	5.12073e-09	1.45246e-07	3082.56	3903.63	3034.6	3558.83	3227.45	3558.45	2138.58	2734.91	2191.57	2648.5	1998.87	2243.52
Kirrel3	1892.74	0.516401	0.0884816	5.83625	5.33879e-09	1.51161e-07	1736.65	1423.62	1593.72	1602.47	1622.53	1370.39	2296.95	1855.87	2170.42	2038.81	2547.39	2454.05
Pofut2	872.32	-0.569822	0.0977061	-5.832	5.47658e-09	1.54512e-07	935.424	1118.52	949.716	1143.95	989.774	1115.87	609.461	815.891	713.781	800.962	693.945	580.551
Etnk1	12512	-0.597398	0.102434	-5.83204	5.47524e-09	1.54512e-07	13265.7	17793.7	13354.5	14912.5	14609.4	16457.9	8494.23	12217	9792.01	11062.4	9244.79	8940.05
Pdpr	1240.92	-0.536817	0.0921328	-5.82656	5.65804e-09	1.59348e-07	1398.53	1485.14	1464.47	1443.75	1292.32	1730.31	1014.68	1216.2	1014.27	902.033	874.507	1054.77
Nudt16l1	1359.87	0.425668	0.0730686	5.8256	5.69083e-09	1.59988e-07	1272.23	1066.94	1219.46	1160.41	1069.39	1181.4	1761.76	1372.04	1574.72	1547.58	1624.08	1468.39
Tomm34	1507.5	0.438694	0.0753141	5.82487	5.71586e-09	1.60408e-07	1172.24	1444.13	1212.71	1222.72	1208.51	1415.02	1531.3	1861.98	1836.44	1648.66	1761.7	1774.61
Rnf141	4557.69	0.262196	0.0450317	5.82247	5.79852e-09	1.6244e-07	4057.45	4077.62	4451.86	4105.52	4208.01	3967.76	5020.96	4743.57	4977.08	5131.81	4739.52	5211.13
Vamp1	599.836	0.562352	0.0966759	5.81687	5.99583e-09	1.67378e-07	503.892	510.168	434.959	491.44	386.356	579.304	797.324	700.79	672.364	652.072	714.441	754.928
E130112N10Rik	599.836	0.562352	0.0966759	5.81687	5.99583e-09	1.67378e-07	503.892	510.168	434.959	491.44	386.356	579.304	797.324	700.79	672.364	652.072	714.441	754.928
Dsel	1593.52	0.533961	0.0918118	5.81582	6.03357e-09	1.68135e-07	1326.17	1235.34	1246.43	1363.8	1489.27	1150.06	2127.65	1602.24	1779.16	2108.37	1666.05	2027.67
Clasp2	15500.1	-0.407846	0.0701982	-5.80993	6.24997e-09	1.73861e-07	16070.6	19835	17333.2	17791.8	17196.6	17827.4	12013.4	15067	13149.4	13522.9	12144.5	14049.1
Ankrd12	3099.59	-0.504131	0.0868569	-5.80416	6.46896e-09	1.79638e-07	3411.47	4152.81	3480.79	3518.85	3646.49	3600.23	2266.37	2986.51	2484.13	2510.48	2208.72	2928.27
Gon7	256.064	0.564069	0.0972148	5.80229	6.54141e-09	1.81333e-07	217.081	190.769	215.793	209.274	206.168	202.282	366.987	257.703	297.849	327.123	284.02	297.718
Atf7	477.889	0.526258	0.090788	5.79656	6.76873e-09	1.87308e-07	367.065	455.485	367.523	356.235	377.975	420.708	507.884	575.503	576.312	554.261	514.358	661.36
Alkbh4	325.714	0.446066	0.0769658	5.79564	6.80608e-09	1.88013e-07	293.389	280.251	279.857	277.464	246.396	279.206	373.541	355.488	361.296	381.462	418.709	361.515
Arpp21	5338.39	-0.451556	0.0779736	-5.79114	6.99108e-09	1.92789e-07	6174.32	6584.34	5717.4	5543.4	5566.54	7413.19	4664.89	4772.09	4141.69	4500.39	4390.1	4592.3
Ddr2	339.15	-1.08098	0.186754	-5.78825	7.11225e-09	1.9579e-07	310.492	564.851	421.472	559.63	375.46	530.871	191.139	272.982	207.085	257.569	252.787	125.467
Vgll4	1539.06	0.366902	0.0634377	5.78367	7.30896e-09	2.00857e-07	1293.28	1338.49	1539.78	1208.61	1343.44	1342.85	1709.33	1630.76	1809.13	1667.13	1836.86	1749.09
Retreg2	8326.99	0.188593	0.0326204	5.78144	7.40648e-09	2.03186e-07	7892.56	7777.42	7640.44	7482.12	7858.69	8048.53	9030.51	8835.25	9055.32	8700.82	8970.53	8631.7
Slitrk3	1343.45	-0.404607	0.0700373	-5.77703	7.60319e-09	2.08223e-07	1560.36	1661	1498.19	1433.17	1500.17	1528.03	1122.81	1129.62	1168.49	1102	1050.19	1367.38
Mrps5	1610.52	-0.282521	0.0489173	-5.77548	7.6733e-09	2.09781e-07	1837.96	1706.98	1731.97	1827.03	1836.24	1668.59	1542.22	1403.62	1429.32	1481.29	1464.99	1396.09
Git1	6555.92	-0.843172	0.146098	-5.77129	7.86664e-09	2.14697e-07	6886.09	9701.9	8309.17	8515.55	7850.31	9249.87	3174	6664.64	4384.9	5142.68	4951.31	3840.56
Bhlhb9	5894.32	0.381292	0.0661676	5.76252	8.28659e-09	2.25771e-07	5419.14	4839.45	5138.58	5076.65	5567.37	4680.02	7406.37	5872.17	6609.96	6979.35	6652.5	6490.26
Pym1	876.263	-0.504465	0.0876168	-5.75763	8.53043e-09	2.32016e-07	1152.51	854.423	1034.01	1134.54	1027.49	968.672	839.921	667.177	705.85	736.842	728.105	665.613
Neurod1	373.63	1.08773	0.18898	5.75577	8.62461e-09	2.34176e-07	260.498	253.531	189.943	219.855	236.339	273.508	508.977	448.18	412.407	405.372	379.669	895.281
Cpe	31647.9	0.22476	0.0390659	5.75336	8.74881e-09	2.37144e-07	30442.7	28827.9	28775.8	30646.8	28565.2	27875	34518.7	32865.8	33986.5	34750	35444.9	33075.4
Cblb	720.325	-0.41499	0.0721516	-5.75164	8.83841e-09	2.39164e-07	726.236	894.193	755.277	839.445	864.062	854.711	586.525	665.139	586.886	590.125	617.816	663.486
Krt73	58.2566	1.44046	0.250511	5.75009	8.91935e-09	2.40944e-07	42.1006	18.0206	22.4785	35.2708	46.9326	24.6917	112.499	52.9667	74.0217	93.4637	93.6972	82.9358
Nudt10	740.659	0.619774	0.107874	5.74536	9.17229e-09	2.47356e-07	698.608	530.674	554.095	601.955	626.047	494.783	1063.83	740.515	818.645	930.29	824.73	1003.74
Gmcl1	1322.37	0.303112	0.0528321	5.73726	9.62181e-09	2.59039e-07	1101.2	1242.8	1146.4	1174.52	1274.72	1155.76	1503.99	1411.77	1448.71	1534.54	1463.04	1410.97
Kcnh3	1668.23	0.664978	0.115925	5.73626	9.67878e-09	2.60131e-07	1427.48	1327.31	1338.59	1069.88	1212.7	1366.59	1993.31	2004.59	1851.42	1569.32	2146.25	2711.36
Cnih2	7263.38	0.384755	0.0672428	5.72188	1.05353e-08	2.82673e-07	6611.12	6105.24	6527.75	5804.4	6552.12	6203.3	8270.32	7601.74	7818.1	7491.22	8709.93	9465.31
Rnf215	991.857	-0.39117	0.0683748	-5.72097	1.05919e-08	2.83714e-07	1223.55	985.538	1168.88	1127.49	1157.39	1095.93	909.823	792.463	894.429	842.26	902.811	801.713
Rrs1	661.131	-0.462198	0.0808949	-5.71356	1.10637e-08	2.95852e-07	697.292	815.896	735.047	802.999	717.398	826.221	484.948	652.916	527.845	560.782	546.567	565.665
Esm1	20.4243	-2.6633	0.466288	-5.7117	1.11854e-08	2.98102e-07	27.6285	50.3333	37.0895	30.568	18.4378	47.4839	1.09222	15.2789	4.40605	8.6943	1.95202	2.12656
Mgat2	1635.04	-0.378435	0.0662534	-5.71194	1.11696e-08	2.98102e-07	2041.88	1728.11	1736.46	2052.76	1800.2	1734.11	1485.43	1406.67	1344.73	1531.28	1383.99	1374.82
Msra	991.356	0.481795	0.0843647	5.71086	1.12405e-08	2.9907e-07	798.597	829.567	875.537	838.27	793.663	829.07	1147.93	1092.95	1238.98	965.067	1086.3	1400.34
Lhx6	3151.82	-0.51673	0.090546	-5.70682	1.15106e-08	3.05233e-07	4383.73	3446.28	3361.66	3444.78	4170.29	3455.88	2781.9	2623.89	2528.19	2953.89	2445.89	2225.44
Lamp1	8787.01	-0.204057	0.0357552	-5.70707	1.14934e-08	3.05233e-07	9679.2	9406.73	9217.3	9481.97	9530.66	9130.21	8218.99	8373.83	8301.89	8006.36	7706.59	8390.34
Haus2	1511.17	0.347378	0.0608737	5.70653	1.15303e-08	3.05246e-07	1368.27	1346.57	1334.1	1243.88	1355.18	1330.5	1916.85	1508.53	1661.96	1688.87	1662.15	1717.2
Slco5a1	1282.46	0.442857	0.0776183	5.70557	1.15952e-08	3.06452e-07	1088.04	1226.02	974.442	928.798	1132.25	1167.16	1483.24	1611.41	1491.89	1483.46	1463.04	1339.73
B230219D22Rik	6778.95	0.42305	0.0742046	5.70112	1.1902e-08	3.14038e-07	6087.49	6020.73	5440.92	5743.26	5623.53	5834.83	8513.89	6918.26	7355.47	8117.21	6814.52	8877.32
Nsa2	1464.29	-0.503638	0.0883479	-5.70063	1.19368e-08	3.14435e-07	1889.27	1524.29	1740.96	1782.35	1818.64	1551.78	1270.26	1149.99	1305.07	1337.83	1236.61	964.394
Cul2	3591.5	0.230392	0.0404248	5.69927	1.20318e-08	3.16413e-07	3258.85	3499.72	3267.25	3309.58	3259.3	3230.81	3983.34	3707.67	3918.74	4046.11	3788.88	3827.81
Tmem245	2818.98	-0.582271	0.102182	-5.69836	1.20969e-08	3.17598e-07	2798.38	4091.29	3403.24	3179.08	3364.06	3441.64	1900.47	2691.12	2232.11	2237.69	2003.75	2484.88
Prkag2	3758.7	0.314572	0.0552753	5.691	1.26297e-08	3.3104e-07	3300.95	3321.38	3503.27	3157.91	3638.95	3179.52	4281.52	3943.98	4484.48	3953.73	4026.05	4312.66
Prps2	877.352	0.626923	0.110172	5.69038	1.26756e-08	3.31296e-07	722.289	691.617	682.222	576.09	698.96	765.441	1146.84	965.623	1058.33	1013.97	838.395	1368.44
Fkbp14	463.661	-0.648594	0.113982	-5.69031	1.26812e-08	3.31296e-07	556.518	509.547	596.804	666.618	638.618	430.205	388.832	354.469	374.515	401.024	353.316	293.465
St8sia4	3764.55	-0.644696	0.113432	-5.68355	1.31928e-08	3.44097e-07	4717.9	4776.07	4057.37	5367.04	4248.23	4384.67	3346.58	2974.28	2779.34	3699.42	2584.48	2239.27
Bcl6b	118.541	1.02703	0.1808	5.68049	1.34308e-08	3.4973e-07	55.2571	91.3456	85.4183	56.4333	64.5323	113.012	148.543	137.51	196.51	154.324	135.666	183.947
Ncoa1	2420.16	-0.682045	0.120138	-5.67719	1.36928e-08	3.55967e-07	2681.28	3431.36	2831.17	2798.15	2877.13	3269.74	1490.89	2108.48	1831.16	1654.09	1578.21	2490.2
Gad2	10670.3	-0.489797	0.0863462	-5.67248	1.40742e-08	3.65284e-07	14002.4	12999.7	11048.2	12438.8	10935.3	13361	10418.7	8750.71	8028.71	9598.5	8114.57	8346.74
Ppp6c	2591.92	0.388795	0.0685797	5.66925	1.43424e-08	3.71639e-07	2349.74	2228.96	2177.04	2552.43	2132.08	2031.36	3184.93	2654.45	2799.61	3054.96	2876.31	3061.18
Gpr137c	1389.53	0.464704	0.0821017	5.6601	1.51282e-08	3.91362e-07	1211.71	1127.22	1221.71	1234.48	1130.57	1082.63	1880.81	1370	1576.49	1709.52	1701.19	1427.98
Scamp5	25781.6	0.275851	0.0487426	5.65934	1.51956e-08	3.92466e-07	23517.2	23083.1	23368.6	23408.1	23101.7	23470.4	28697.1	26867.4	29555.8	27239.2	31050.9	26019.5
Set	5324.62	-0.331764	0.0586256	-5.65904	1.52225e-08	3.92523e-07	6029.6	6140.04	5482.5	6080.69	5674.65	6195.71	4542.56	5036.93	4629.88	4848.16	4195.88	5038.88
Ece1	806.573	-0.481021	0.0851366	-5.64999	1.60457e-08	4.1308e-07	906.48	1017.85	863.174	860.608	890.88	1096.88	614.922	781.259	626.541	656.419	669.544	694.321
Nt5c2	2161.17	0.260994	0.0461966	5.64964	1.60787e-08	4.13259e-07	1894.53	2076.09	1952.26	2079.8	1911.66	1880.36	2420.37	2275.53	2393.37	2270.3	2410.75	2368.99
Celsr2	6038.51	-0.744651	0.131852	-5.64761	1.62695e-08	4.17488e-07	6724.26	7843.29	7610.09	6861.35	7625.7	8713.3	3294.15	5690.86	4024.49	4052.63	4071.92	5950.11
Tfrc	9960.91	-0.675926	0.119703	-5.64668	1.63572e-08	4.19061e-07	10848.8	11341.8	13526.4	12487	13576.9	11734.2	8024.57	8100.85	7546.69	9269.21	8047.22	5027.18
Mt2	529.883	-0.875314	0.155048	-5.64543	1.64764e-08	4.21436e-07	763.074	626.991	731.675	585.496	734.997	672.373	441.259	424.752	291.681	284.738	275.235	526.323
Tspyl5	2305.71	-0.301971	0.0535011	-5.6442	1.65951e-08	4.23789e-07	2501.04	2457.01	2554.68	2715.85	2676.83	2372.3	2153.87	1895.6	2079.66	2175.75	2035.96	2050
Fstl5	2925.73	-0.814166	0.144406	-5.63805	1.7199e-08	4.38506e-07	4262.69	3685.52	3307.71	4346.54	3736.17	3041.82	2461.87	2139.04	1874.34	2802.82	2081.83	1368.44
Stbd1	386.478	-0.642471	0.11396	-5.63767	1.72366e-08	4.38759e-07	406.534	436.222	522.625	503.197	524.639	434.003	317.837	331.042	324.286	326.036	298.66	212.656
Srf	1403.14	0.309797	0.0549684	5.63591	1.74135e-08	4.42554e-07	1227.5	1290.02	1221.71	1207.44	1341.77	1225.09	1543.31	1472.88	1504.23	1481.29	1656.29	1666.16
Phtf2	1322.76	0.31269	0.0555082	5.63321	1.76881e-08	4.48814e-07	1106.46	1290.64	1175.62	1152.18	1208.51	1137.72	1535.67	1477.97	1459.29	1479.12	1351.78	1498.16
Slc1a1	1766.69	-0.512664	0.091028	-5.63194	1.78197e-08	4.51433e-07	1972.15	2405.43	1819.63	1988.1	1987.93	2287.78	1269.16	1710.21	1513.92	1446.51	1298.1	1501.35
Vstm5	402.737	-0.528495	0.0938908	-5.62883	1.8144e-08	4.58916e-07	451.266	419.444	490.031	447.939	513.744	532.77	341.866	330.023	372.752	347.772	316.228	269.01
Nbl1	1149.57	0.368674	0.0655221	5.62672	1.83669e-08	4.63814e-07	938.055	986.16	1045.25	938.204	1021.62	1089.28	1220.01	1204.99	1295.38	1443.25	1366.42	1246.16
Sart3	1263.84	0.347208	0.0617224	5.62532	1.85169e-08	4.66862e-07	1036.73	1152.07	1111.56	1160.41	1091.18	1121.57	1262.61	1414.82	1419.63	1458.47	1578.21	1358.87
Psat1	3216.24	-0.574091	0.102062	-5.62491	1.856e-08	4.67207e-07	3237.8	4310.64	3838.2	4100.82	3666.61	3931.67	2240.15	3003.82	2710.6	2897.37	2627.42	2029.8
Hmox2	1423.5	-0.348745	0.0620092	-5.62409	1.86485e-08	4.68692e-07	1660.34	1494.46	1630.81	1487.25	1738.18	1560.32	1222.2	1291.57	1387.91	1208.51	1194.64	1205.76
Myl12b	6900.82	0.286843	0.0510292	5.62115	1.89691e-08	4.75995e-07	6509.81	6036.27	6069.19	5778.54	6188.39	6720.88	7692.54	7224.86	7608.37	7307.56	7508.46	8164.92
Gzf1	1498.76	-0.36529	0.0650659	-5.61416	1.97517e-08	4.94281e-07	1555.09	1699.53	1810.64	1727.09	1842.1	1489.1	1283.36	1311.94	1345.61	1268.28	1254.18	1398.21
Aldh5a1	3808.1	-0.415369	0.0739869	-5.61409	1.97601e-08	4.94281e-07	4324.53	4718.28	4128.17	3878.61	4227.28	4834.82	3260.29	3583.4	3343.31	3231.02	2789.44	3378.04
Cemip	2088.54	-0.71894	0.128291	-5.60397	2.095e-08	5.23223e-07	2190.55	3002.6	2378.22	2570.07	2297.18	3150.08	1362	1883.37	1515.68	1288.93	1403.51	2020.23
Rrbp1	1979.31	-0.792175	0.141407	-5.60211	2.1176e-08	5.28038e-07	1941.89	2993.28	2289.43	2652.37	2348.3	2830.04	1039.8	2023.94	1406.41	1533.46	1373.25	1319.53
Pde4a	2060.1	-0.417009	0.0744418	-5.60181	2.1213e-08	5.28131e-07	2194.5	2440.85	2422.06	2123.3	2520.95	2430.23	1508.36	1941.43	1838.21	1876.88	1621.16	1803.32
Slc5a5	98.8284	-0.836166	0.149408	-5.59652	2.18696e-08	5.43134e-07	131.565	147.893	114.64	108.164	125.712	132.005	64.4412	89.6359	81.9526	58.6865	78.081	53.164
Tlcd3b	3455.81	-0.421636	0.0753404	-5.59641	2.1884e-08	5.43134e-07	3646.97	4070.16	3915.75	3989.13	3980.05	4139.65	2425.83	3432.65	2838.38	3084.3	2973.91	2972.93
Erc2	6855.6	-0.447525	0.08003	-5.59196	2.24514e-08	5.56347e-07	7568.91	8663.54	7771.94	7777.21	7956.74	7721.84	5217.56	6292.85	5916.45	5535.01	4956.19	6888.99
Golga7	2791.37	0.416949	0.07458	5.59063	2.2625e-08	5.58904e-07	2615.5	2356.34	2323.15	2287.9	2210.86	2551.79	3586.87	2886.68	3043.7	3505.98	2854.84	3272.77
Gm6829	2791.37	0.416949	0.07458	5.59063	2.2625e-08	5.58904e-07	2615.5	2356.34	2323.15	2287.9	2210.86	2551.79	3586.87	2886.68	3043.7	3505.98	2854.84	3272.77
Mfsd2a	110.718	-0.64773	0.115944	-5.58659	2.31573e-08	5.71167e-07	139.458	131.737	128.127	143.435	149.178	119.66	90.6546	80.4686	95.1708	83.6826	81.985	85.0623
Kpna1	6263.99	0.243425	0.0435939	5.58393	2.3515e-08	5.79088e-07	5603.33	5942.43	5764.61	5593.95	5880.82	5628.75	7158.44	6431.38	6753.6	7202.14	6703.25	6505.14
Pak1ip1	1259.04	-0.332521	0.0595549	-5.58344	2.35801e-08	5.79792e-07	1368.27	1429.84	1361.07	1455.51	1358.53	1447.31	1069.29	1193.79	1105.04	1195.47	1142.91	981.407
Ccdc91	1510.76	-0.464939	0.0832982	-5.58162	2.38288e-08	5.85002e-07	1872.16	1575.25	1805.02	1835.26	1795.17	1632.5	1405.69	1163.23	1288.33	1433.47	1274.67	1048.39
G3bp1	4008.14	0.323161	0.05796	5.57558	2.46703e-08	6.04728e-07	3435.15	3846.46	3387.51	3416.57	3312.94	3962.06	4432.25	4494.02	4355.82	4280.85	4435	4739.04
LTO1	652.443	0.369482	0.0662749	5.57499	2.47545e-08	6.05856e-07	553.887	604.621	537.236	580.793	533.02	604.945	708.854	755.794	760.485	746.623	782.762	660.296
Egfr	524.396	-0.925546	0.166055	-5.57373	2.49349e-08	6.08836e-07	772.284	690.374	593.432	775.958	446.697	844.265	433.613	375.86	342.791	232.572	342.58	442.324
Lgalsl	5132.67	-0.4823	0.0865329	-5.5736	2.49529e-08	6.08836e-07	6482.18	5365.78	5916.34	6666.18	6014.07	5454.01	4816.71	3890	4285.33	4973.14	3848.42	3879.91
Syt7	7934.68	-0.412913	0.0741281	-5.57026	2.5436e-08	6.19671e-07	8599.06	9840.47	8914.97	9001.11	9171.12	8846.26	5633.69	7929.72	6940.42	6746.77	6604.67	6987.87
Tmem268	296.558	-0.511084	0.0917571	-5.56997	2.54786e-08	6.19759e-07	357.855	342.391	345.045	331.546	398.927	315.293	226.09	264.833	255.551	276.044	230.339	214.782
Heg1	284.074	-0.846044	0.15218	-5.5595	2.7055e-08	6.57097e-07	376.275	390.238	303.46	353.884	396.412	369.425	188.955	229.183	209.728	144.543	152.258	294.528
Nfatc3	486.76	0.570593	0.102675	5.55726	2.74035e-08	6.63794e-07	327.596	471.642	400.117	373.871	344.451	428.305	507.884	624.396	600.986	560.782	539.735	661.36
Ppfia2	8204.11	-0.683428	0.122981	-5.5572	2.74143e-08	6.63794e-07	7953.08	12221	9452.2	10493.1	9635.42	10913.7	4852.75	8105.94	6308.59	6865.23	6088.36	5559.89
Sh3gl2	7368.87	0.282536	0.0509006	5.55075	2.84449e-08	6.87699e-07	6850.56	6869.56	6642.39	6535.68	7003.01	5994.37	8334.76	7511.08	8081.58	8504.11	8119.45	7979.91
Hcn3	2753.05	-0.300595	0.0541783	-5.54826	2.88529e-08	6.96503e-07	2901	3070.33	3141.37	3010.95	3232.48	2874.68	2245.61	2678.89	2394.25	2478.96	2521.04	2487.01
Arhgap5	3660.34	-0.400131	0.0721874	-5.54295	2.97414e-08	7.16862e-07	4027.19	4170.21	4444	4257.19	4110.79	3977.26	3477.64	3119.94	3008.45	3652.69	2785.54	2893.18
Ltv1	503.766	-0.467927	0.0844502	-5.54086	3.00995e-08	7.24394e-07	547.308	614.563	515.881	636.05	581.628	610.644	421.599	474.663	392.139	386.896	387.477	476.349
Slc35a4	1285.6	0.413933	0.0747113	5.54043	3.01727e-08	7.25058e-07	1085.41	1230.37	1010.41	1031.08	1001.51	1251.68	1410.06	1574.74	1436.37	1366.09	1543.08	1486.46
Spryd3	8437.62	0.255455	0.0461184	5.53911	3.04014e-08	7.2835e-07	7864.93	7274.09	8011.33	7618.5	7425.4	7968.76	9247.86	8744.6	9436	8748.64	9824.54	9086.79
Tor1aip2	2331.57	0.341137	0.0615855	5.53925	3.03776e-08	7.2835e-07	2140.55	2005.87	2051.16	2218.53	2075.93	1854.72	2820.12	2329.52	2622.48	2660.45	2686.96	2512.53
Zfp873	267.968	0.758012	0.136983	5.53362	3.13693e-08	7.49278e-07	211.819	169.02	225.909	178.705	243.044	167.143	433.613	267.889	334.86	372.768	315.252	295.592
Kif1b	28501.4	-0.651192	0.117676	-5.53379	3.1339e-08	7.49278e-07	29767.8	41914.6	33049	33214.5	33922.2	37089.7	17210.2	28341.3	21710.4	21265.2	19186.4	25345.4
Ago2	7333.37	-0.674307	0.121955	-5.52914	3.21811e-08	7.67514e-07	7539.96	11195.1	8277.7	8555.52	8291.14	10237.5	4546.93	7380.7	5300.48	5424.15	5166.03	6085.15
Acadm	1001.97	-0.388385	0.0703086	-5.524	3.31361e-08	7.89105e-07	1198.55	1123.49	1176.75	1145.13	1086.15	1089.28	850.843	923.861	913.816	932.463	866.699	716.65
Spryd4	564.825	0.366527	0.0663566	5.52359	3.32141e-08	7.89781e-07	526.258	462.321	477.668	482.034	523.801	491.934	665.165	609.117	660.027	590.125	681.257	608.196
Rbp4	248.306	-0.859386	0.155635	-5.5218	3.35538e-08	7.96663e-07	234.185	315.049	340.549	312.735	336.071	381.771	166.018	221.034	198.272	204.316	159.09	110.581
Lrp10	1258.39	-0.415296	0.075228	-5.52049	3.38047e-08	8.01423e-07	1384.06	1431.08	1472.34	1435.52	1436.47	1471.05	962.25	1303.8	1096.23	1020.49	1116.56	970.774
Nup155	1422.86	0.330878	0.0599546	5.51881	3.41295e-08	8.07917e-07	1194.61	1336.01	1281.27	1153.36	1347.63	1242.18	1589.19	1493.25	1588.82	1632.35	1495.25	1720.39
Wnt5a	506.655	-0.695694	0.126133	-5.51555	3.47684e-08	8.20595e-07	759.127	602.757	525.997	711.295	542.239	618.241	507.884	342.246	316.355	398.851	405.045	349.819
Tsc22d2	1973.53	-0.701917	0.12726	-5.5156	3.47596e-08	8.20595e-07	2149.76	3034.29	1926.41	2606.51	2277.91	2668.6	1327.05	1836.52	1351.78	1843.19	1342.99	1317.4
Slc25a24	56.8279	-1.0316	0.187087	-5.51402	3.50732e-08	8.26561e-07	81.57	73.9464	74.179	75.2444	78.7796	74.075	26.2134	48.8923	29.9612	54.3394	37.0885	27.6453
Minpp1	1334.94	0.369673	0.0671471	5.50541	3.68306e-08	8.66693e-07	1199.87	1202.41	1170.01	1031.08	1225.27	1157.66	1443.92	1382.23	1552.69	1509.55	1433.76	1710.82
H2-T22	183.889	-0.844253	0.153605	-5.49627	3.87901e-08	9.10106e-07	265.76	220.597	212.422	277.464	251.424	190.885	148.543	142.603	128.657	119.547	166.898	81.8725
H2-T9	183.889	-0.844253	0.153605	-5.49627	3.87901e-08	9.10106e-07	265.76	220.597	212.422	277.464	251.424	190.885	148.543	142.603	128.657	119.547	166.898	81.8725
Sv2b	5015.67	0.552172	0.100511	5.49365	3.93715e-08	9.22385e-07	3965.35	4287.03	4100.08	4127.86	4174.48	3748.38	5709.06	5172.4	6054.8	5073.12	5760.42	8015
Nfib	4594.01	0.407363	0.0741713	5.49219	3.96972e-08	9.28647e-07	3661.44	4474.69	3671.86	3939.75	3959.1	3984.85	4798.14	4982.94	5029.95	5312.22	5114.3	6198.92
Tfdp1	1583.27	-0.292288	0.0532298	-5.49106	3.99518e-08	9.33228e-07	1806.38	1703.25	1753.32	1621.28	1774.22	1799.64	1424.26	1383.25	1430.21	1448.69	1309.81	1544.94
Ppm1m	75.0855	-0.88119	0.160623	-5.48607	4.10978e-08	9.58586e-07	113.145	82.646	94.4096	104.637	102.246	88.3201	51.3345	46.8551	65.2096	63.0336	37.0885	52.1007
Zfp862-ps	971.53	0.407361	0.0743009	5.48258	4.1917e-08	9.76261e-07	732.814	941.419	775.508	814.756	869.928	869.906	1028.88	1152.03	1109.44	1021.58	1133.15	1208.95
Sacs	3439.01	-0.479013	0.087448	-5.47769	4.30914e-08	1.00214e-06	3383.84	4756.81	4001.17	3949.16	4030.33	3902.23	2571.1	3061.88	2897.42	2984.32	2511.28	3218.55
Acsl1	1871.68	-0.356279	0.065094	-5.47331	4.41711e-08	1.02425e-06	1974.78	2275.56	1988.22	2095.09	2012.23	2260.24	1533.48	1775.4	1645.22	1530.2	1579.19	1790.56
Gskip	552.384	0.487626	0.0890902	5.47339	4.41503e-08	1.02425e-06	469.685	440.572	503.518	493.791	408.984	445.399	740.528	561.243	623.897	730.321	610.984	599.69
Aldoa	31354.4	-0.467764	0.0855634	-5.46687	4.58061e-08	1.06062e-06	33489.7	36228.8	35492.4	32890	38845.9	41410.7	24574	31302.3	26372	27653.3	22324.3	25669.7
Cfap20	1133.95	-0.464793	0.0850497	-5.46495	4.6304e-08	1.07059e-06	1373.53	1099.25	1327.35	1416.71	1399.6	1277.32	1111.88	881.08	1004.58	930.29	945.756	839.991
Pigq	3837.24	0.255551	0.0467641	5.46469	4.6372e-08	1.0706e-06	3423.31	3688.62	3485.29	3601.15	3370.76	3419.79	4165.74	4197.61	4338.2	3967.86	4443.78	3944.77
Kcnab3	307.475	0.638524	0.116931	5.46069	4.74277e-08	1.0918e-06	213.135	242.967	204.554	216.328	234.663	328.589	387.74	347.339	345.435	354.293	390.405	424.248
Ccdc71	2018.94	0.322955	0.0591411	5.46076	4.74101e-08	1.0918e-06	1872.16	1639.87	1893.81	1843.49	1706.33	1813.89	2421.46	2063.66	2188.93	2224.65	2179.44	2379.62
Emx2os	82.7402	-0.924518	0.1694	-5.4576	4.82602e-08	1.10936e-06	102.62	102.531	94.4096	115.218	120.684	113.961	66.6257	78.4314	44.9417	66.294	47.8246	39.3413
Mettl9	2240.24	-0.529111	0.0970202	-5.45361	4.93561e-08	1.13291e-06	2952.31	2233.31	2792.95	2745.25	2837.74	2320.07	2077.41	1548.26	1957.17	1956.22	1580.16	1882
Dazap2	1889.83	-0.386448	0.0708689	-5.45299	4.95293e-08	1.13361e-06	2069.51	2326.52	2016.32	2152.7	2027.32	2253.59	1542.22	1866.06	1674.3	1726.9	1443.52	1578.97
Gcc2	2323.79	-0.447604	0.0820808	-5.45321	4.94676e-08	1.13361e-06	2503.67	3039.88	2618.74	2719.38	2681.02	2522.35	1770.5	2261.27	1965.98	2125.76	1664.1	2012.79
Mark1	4086.6	-0.464713	0.0852784	-5.44936	5.05513e-08	1.15533e-06	4262.69	5370.13	4542.9	4620.48	4578.44	5057.04	2941.36	4137.51	3390.9	3580.96	3322.35	3234.5
Tsnax	4488.24	0.365838	0.0671653	5.44683	5.1276e-08	1.17021e-06	4217.96	3748.9	3625.78	4144.32	3870.26	3929.77	5687.21	4532.73	5135.7	4955.75	5354.4	4656.1
Cks1b	143.496	-0.655388	0.12041	-5.44296	5.24032e-08	1.19422e-06	185.506	158.457	165.217	204.571	160.074	180.439	123.421	120.194	96.052	128.241	108.337	91.442
Bicd2	3478.04	-0.363118	0.0667211	-5.44233	5.25879e-08	1.19671e-06	3662.76	4254.09	3842.7	3958.56	3661.58	4098.81	2616.97	3344.03	3015.5	3020.18	3191.56	3069.69
Mettl4	445.962	0.373434	0.0686578	5.43906	5.35624e-08	1.21715e-06	376.275	398.938	413.604	411.493	384.679	346.633	506.792	474.663	518.152	534.699	488.006	497.615
Rps8	7434.86	-0.253957	0.0467406	-5.43333	5.53132e-08	1.25335e-06	8766.14	7386.57	8003.47	8100.53	8138.61	8136.85	7030.65	6836.78	6586.17	6955.44	6624.19	6652.94
Gm15501	7434.86	-0.253957	0.0467406	-5.43333	5.53132e-08	1.25335e-06	8766.14	7386.57	8003.47	8100.53	8138.61	8136.85	7030.65	6836.78	6586.17	6955.44	6624.19	6652.94
Crls1	1343.27	-0.520879	0.095878	-5.43273	5.54979e-08	1.25395e-06	1719.55	1359.62	1649.92	1782.35	1611.63	1378.93	1251.69	954.419	1155.27	1236.76	1011.15	1007.99
Mgat3	5517.1	-0.323694	0.0595795	-5.43298	5.5421e-08	1.25395e-06	6166.43	6128.23	6459.19	5568.09	6404.62	6074.15	4451.91	5307.87	5186.81	4826.42	4574.57	5056.96
Hint3	416.485	0.489301	0.0900826	5.43169	5.5823e-08	1.25951e-06	348.646	322.506	403.489	345.654	337.747	323.841	529.729	407.436	475.854	459.711	545.591	497.615
Stimate	681.637	0.354031	0.0652151	5.42867	5.67761e-08	1.27919e-06	594.672	545.588	633.893	577.266	630.237	611.593	784.217	706.902	816.882	746.623	730.057	801.713
Tll1	263.822	-1.00321	0.184898	-5.42576	5.77099e-08	1.29839e-06	299.967	456.728	274.238	451.466	279.919	349.482	126.698	251.592	155.974	155.411	217.651	146.733
Polg	1397.07	-0.353779	0.0652378	-5.42292	5.86328e-08	1.31729e-06	1381.43	1610.04	1601.59	1561.32	1470.83	1776.85	1218.92	1296.67	1215.19	1251.98	1220.02	1160.04
AU022252	1876.36	0.283798	0.0523836	5.41768	6.03761e-08	1.35454e-06	1659.03	1719.41	1776.92	1808.22	1573.08	1620.15	2158.24	1943.47	2043.53	1989.91	2116.97	2107.42
5330413P13Rik	135.445	0.950036	0.175381	5.417	6.06085e-08	1.35783e-06	99.989	98.181	80.9226	101.11	65.3703	109.213	218.445	144.64	164.786	121.72	191.298	229.668
Tbk1	978.289	0.30446	0.0562271	5.41482	6.13487e-08	1.37248e-06	905.164	934.583	850.811	841.797	901.776	814.825	1026.69	1045.07	1080.36	1125.91	1072.64	1139.84
Rab15	6098.39	-0.302874	0.0560084	-5.40765	6.38577e-08	1.42368e-06	6797.94	6460.06	6977.32	6623.86	6931.77	6628.76	5191.34	5883.38	5787.79	5231.79	4900.56	5766.16
Nras	5531.56	0.463931	0.0857914	5.40766	6.38519e-08	1.42368e-06	4277.16	4960	4590.11	4585.21	4753.6	4728.45	6559.9	6260.26	6446.06	6329.45	5095.76	7792.77
Rasal2	2288.29	-0.447091	0.0826796	-5.40751	6.39058e-08	1.42368e-06	2491.83	2801.89	2553.56	2487.77	2840.26	2661	1985.66	2063.66	1842.61	1786.68	1630.92	2313.7
Ddx50	2077.78	-0.402074	0.0745347	-5.39445	6.87322e-08	1.52905e-06	2289.22	2424.08	2387.22	2572.42	2176.5	2343.81	1874.26	1792.72	1796.79	1987.73	1831.97	1456.69
Klhl3	934.738	0.653121	0.121099	5.39326	6.91889e-08	1.53706e-06	613.091	870.579	691.213	694.835	638.618	848.063	1059.46	1260	988.718	923.769	1223.92	1404.59
Gtf2ird1	934.43	-0.284272	0.0527378	-5.39028	7.03487e-08	1.56064e-06	1016.99	1020.96	1056.49	1038.14	1012.4	1013.31	836.644	857.653	819.526	767.272	877.435	896.344
Ppp1r3d	572.124	0.539709	0.100136	5.38979	7.05406e-08	1.56272e-06	502.576	421.308	479.916	449.115	525.477	421.657	776.572	565.318	724.355	680.329	744.697	574.171
Rpl14-ps1	47.2242	-1.0556	0.196	-5.38572	7.21542e-08	1.59623e-06	76.3074	48.4691	56.1962	82.2986	55.3134	65.5278	25.1212	35.6507	28.1987	32.6036	31.2324	29.7718
Gpat3	65.1611	-1.03785	0.192763	-5.38409	7.28139e-08	1.60859e-06	65.7823	98.181	83.1704	101.11	83.8081	94.0182	49.1501	31.5763	62.566	35.864	45.8726	30.8351
Lactb	462.061	0.40912	0.0760487	5.37972	7.4602e-08	1.6458e-06	430.216	381.539	391.126	371.519	429.098	379.872	543.928	453.273	557.806	510.79	542.663	552.905
Brd2	10962.4	0.335061	0.0622925	5.37884	7.49678e-08	1.64929e-06	8975.33	10609.1	9056.58	10042.8	9159.39	10322.1	11448.7	12556.2	11863.7	11517.8	13074.7	12922
Grin3a	1961.48	-0.287461	0.0534407	-5.37907	7.48719e-08	1.64929e-06	2233.97	2195.4	1984.85	2160.93	2222.59	2138.68	1843.67	1672.53	1874.34	1794.29	1627.01	1789.5
Zfp641	506.099	-0.55595	0.103419	-5.37572	7.62784e-08	1.6758e-06	639.404	544.345	669.859	525.535	647.837	588.801	398.662	382.99	470.567	416.239	321.108	467.843
Pole3	745.966	0.590957	0.109986	5.373	7.74386e-08	1.69894e-06	656.507	555.53	578.821	672.497	465.135	646.731	957.881	789.407	947.302	832.479	770.074	1079.23
Flot2	4386.33	0.269558	0.0502142	5.36816	7.95448e-08	1.74274e-06	3986.4	3930.35	4242.81	3805.72	3804.05	4098.81	4707.49	4706.91	4814.94	4553.64	4702.43	5282.37
Elp3	5704.86	0.209979	0.0391226	5.36721	7.99627e-08	1.74949e-06	5220.48	5269.46	5376.85	5227.13	5412.33	5236.53	5978.84	5944.49	6504.22	6053.4	5868.76	6365.85
Stim1	1689.97	-0.326174	0.0607861	-5.36592	8.05371e-08	1.75963e-06	1889.27	1903.97	1829.75	1921.08	1806.07	1930.7	1394.77	1538.07	1479.55	1473.68	1384.96	1727.83
Napepld	187.377	0.638109	0.118939	5.36503	8.09347e-08	1.76589e-06	136.827	167.778	156.225	115.218	141.636	158.596	220.629	202.699	227.352	234.746	203.987	282.832
P3h4	249.317	-0.565753	0.105486	-5.36329	8.17208e-08	1.78059e-06	269.707	259.123	318.071	359.762	299.195	281.105	214.076	194.551	206.203	229.312	175.682	185.011
Pdha1	10627.5	-0.302599	0.0564269	-5.36267	8.19999e-08	1.78423e-06	11655.3	11832.1	11823.7	12117.9	11666.9	11333.5	9867.16	10255.2	9761.17	9545.25	9541.5	8130.9
Zscan18	1000.44	-0.401732	0.0749225	-5.36197	8.23178e-08	1.7887e-06	1027.52	1203.65	1126.17	1299.14	1116.32	1059.84	749.266	914.694	902.36	865.083	837.418	903.787
Cant1	2173.58	0.262902	0.0490439	5.36054	8.29748e-08	1.80051e-06	1860.32	2096.6	1936.52	1938.72	1958.6	2057.95	2299.13	2460.91	2305.25	2278.99	2366.83	2523.16
Mgat4a	1310.66	0.300864	0.0561335	5.3598	8.33161e-08	1.80545e-06	1147.24	1212.35	1198.1	1165.11	1123.87	1198.49	1472.32	1368.99	1495.41	1401.96	1345.92	1598.11
2310022B05Rik	2189.56	0.641488	0.119727	5.35794	8.41763e-08	1.8216e-06	1291.96	1937.52	1799.4	1401.43	1764.16	2064.6	2263.09	2990.58	2708.84	2442.01	2506.4	3104.78
Gsn	250.623	-0.656468	0.122551	-5.35668	8.47654e-08	1.83185e-06	386.8	288.95	305.707	256.301	306.738	296.3	222.814	194.551	198.272	223.878	146.402	180.757
Tmem176b	580.623	-0.417465	0.0779431	-5.35602	8.5076e-08	1.83426e-06	653.876	707.773	554.095	656.037	733.321	675.222	482.763	537.816	484.666	489.054	466.534	526.323
Zadh2	494.467	0.567828	0.10602	5.35587	8.5145e-08	1.83426e-06	510.47	361.033	385.506	360.938	377.137	398.865	679.364	492.998	556.044	548.827	614.888	647.537
Inafm1	677.756	-0.393871	0.0735423	-5.35571	8.52231e-08	1.83426e-06	777.546	703.423	783.375	797.12	832.215	728.404	562.496	588.745	631.828	565.129	647.096	515.69
Ckap4	2352.24	-0.431966	0.0807054	-5.35238	8.68027e-08	1.86573e-06	2439.21	2788.22	2778.34	2745.25	2638.28	2820.55	1593.56	2228.68	2089.35	2179.01	1893.46	2032.99
Smarcc2	8768.93	-0.387852	0.0724946	-5.35009	8.79128e-08	1.88704e-06	9884.44	10362.4	9615.17	9465.51	9622.01	10692.4	6615.6	8515.41	7340.49	7155.41	7319.12	8639.14
Adamts15	1818.09	-0.834722	0.15603	-5.34976	8.80692e-08	1.88784e-06	1972.15	2862.16	1955.63	2216.18	2067.55	2904.12	1069.29	1876.24	1194.04	1305.23	1439.62	954.825
Spata2	2412.67	0.38695	0.0724429	5.34145	9.22057e-08	1.97385e-06	1927.42	2283.64	2199.52	1861.12	2017.26	2252.64	2461.87	2782.79	2707.08	2561.56	2958.29	2938.9
Rfx5	346.697	-0.468953	0.0878239	-5.3397	9.31025e-08	1.99036e-06	465.738	377.81	343.921	405.614	421.555	401.714	312.376	266.871	269.65	284.738	296.708	313.667
Net1	381.863	-0.554076	0.103858	-5.33493	9.55815e-08	2.04061e-06	411.797	505.197	398.993	407.966	453.402	545.116	299.269	370.767	299.612	310.821	274.259	305.161
Lmbrd1	3557.33	-0.278411	0.0522321	-5.33027	9.80665e-08	2.09086e-06	3631.18	4109.93	3823.59	3979.72	3872.77	3975.36	3160.9	3448.95	3271.94	3375.56	3059.8	2978.25
Pcm1	5564.08	0.255579	0.0479665	5.32828	9.91498e-08	2.11112e-06	4740.27	5455.88	5204.89	4902.64	5100.56	5020.95	6266.09	5713.27	5915.57	6111	5963.43	6374.36
Dus1l	829.224	-0.303591	0.0570021	-5.32596	1.00419e-07	2.13529e-06	918.32	894.193	917.122	949.961	902.614	915.49	735.067	717.087	694.394	810.743	788.618	707.081
Dck	1331.09	0.364468	0.0684793	5.32231	1.02456e-07	2.17569e-06	1220.92	1196.81	1136.29	989.934	1268.02	1167.16	1566.25	1429.08	1521.85	1591.06	1368.37	1517.3
Crot	855.603	-0.873791	0.164298	-5.31833	1.04724e-07	2.22087e-06	1259.07	812.168	1449.86	798.296	1199.29	1124.42	666.257	513.369	628.303	562.956	444.086	809.156
Garem2	202.102	-0.622055	0.117014	-5.31608	1.06028e-07	2.24553e-06	226.291	233.024	266.37	203.395	277.405	263.061	143.081	179.272	166.549	129.328	150.306	187.137
Plcb1	6964.16	-0.598439	0.112773	-5.30657	1.11709e-07	2.3627e-06	7442.6	8940.68	7787.67	8208.69	8029.66	9918.45	4305.55	7166.8	5612.43	5854.52	4784.41	5518.42
Ireb2	6634.68	-0.337201	0.0635661	-5.30473	1.12842e-07	2.38348e-06	6855.83	8316.8	7069.48	7616.14	6881.49	7694.3	5776.78	6328.5	5789.55	5763.23	5371.97	6152.13
Ptbp3	688.467	0.663748	0.125169	5.30281	1.14032e-07	2.40543e-06	577.568	504.576	501.27	534.941	528.829	549.864	991.74	679.4	762.247	943.331	625.624	1062.22
Zfp618	620.27	-0.462451	0.0872225	-5.30197	1.14559e-07	2.41333e-06	724.92	607.728	637.265	818.283	739.188	787.284	581.063	529.667	480.26	507.53	514.358	515.69
Asap1	2170.17	-0.483318	0.0911735	-5.30108	1.1512e-07	2.42194e-06	2211.6	2924.3	2354.62	2438.39	2593.02	2656.25	1529.11	2149.23	1846.14	1754.07	1666.05	1919.22
Wdr37	4260.41	0.293718	0.055416	5.30025	1.15644e-07	2.42975e-06	3941.67	3979.44	3610.05	4053.79	3696.78	3686.65	5035.15	4424.76	4564.67	5088.34	4550.17	4493.42
Sumf2	543.53	-0.507024	0.0957051	-5.29777	1.17223e-07	2.45697e-06	676.242	535.024	672.107	733.633	665.437	548.914	487.132	406.417	405.357	456.451	488.006	447.641
Cln3	519.154	0.421059	0.079479	5.29773	1.17249e-07	2.45697e-06	430.216	449.893	446.198	460.872	464.297	412.161	535.19	569.392	637.115	673.808	627.576	523.133
Klhl25	861.816	0.606985	0.114762	5.28907	1.22942e-07	2.57288e-06	669.663	614.563	818.217	681.902	767.683	548.914	891.255	838.3	1210.78	1098.74	1085.33	1116.44
Flt3	40.3211	-1.10732	0.209404	-5.28795	1.23694e-07	2.5852e-06	44.7319	62.1399	47.2048	56.4333	62.018	56.9807	29.4901	33.6135	27.3175	29.3433	17.5682	17.0125
A830029E22Rik	72.2927	1.87287	0.354721	5.27984	1.29297e-07	2.69875e-06	44.7319	17.3992	25.8503	23.5139	33.5233	41.7859	129.975	52.9667	89.8835	104.332	53.6807	249.871
Peli2	844.618	0.515868	0.0978213	5.27357	1.33792e-07	2.78527e-06	682.82	687.888	741.79	614.888	636.104	807.227	985.186	1037.94	929.677	817.264	986.748	1207.89
Gm6498	844.618	0.515868	0.0978213	5.27357	1.33792e-07	2.78527e-06	682.82	687.888	741.79	614.888	636.104	807.227	985.186	1037.94	929.677	817.264	986.748	1207.89
Rbm41	312.294	-0.727934	0.138086	-5.2716	1.35242e-07	2.81176e-06	398.64	344.255	457.437	425.601	381.327	330.488	265.411	194.551	256.432	312.995	193.25	187.137
Amacr	173.981	-0.861831	0.163535	-5.26999	1.36429e-07	2.83272e-06	232.869	206.304	249.511	230.436	237.177	191.835	116.868	123.249	148.043	141.282	146.402	63.7968
Thap3	330.365	-0.64065	0.121663	-5.26578	1.39598e-07	2.89475e-06	486.789	302	473.172	380.925	419.879	355.18	288.347	233.257	244.095	283.651	255.715	241.364
Mrs2	489.154	-0.442098	0.0839686	-5.26504	1.40159e-07	2.90259e-06	511.786	609.592	529.368	576.09	529.667	620.14	435.798	428.826	357.772	447.756	379.669	443.387
Wdr6	22928.1	0.331339	0.062967	5.2621	1.42419e-07	2.94555e-06	21914.7	20527.3	20391.4	19032.1	20258.9	19717.2	25140.8	24145.7	24670.4	23049.7	27608.5	28680.9
Rtn4	40387.7	0.210456	0.0399998	5.26143	1.42936e-07	2.95241e-06	36697.3	39617.3	36515.2	38321.7	38608.7	34914.9	42868.7	42658.6	43297.4	44612.6	42543.4	43996.4
Ldlr	1816.63	0.487113	0.0926085	5.25991	1.44124e-07	2.97308e-06	1541.94	1565.3	1592.6	1395.55	1747.4	1232.68	2104.72	1918.01	2035.6	2349.63	2410.75	1905.4
9430015G10Rik	816.701	0.30463	0.0579543	5.25637	1.46925e-07	3.02693e-06	651.244	738.222	738.418	751.268	734.159	768.29	875.964	863.764	902.36	891.165	971.132	914.42
Ccdc115	1274.71	-0.512178	0.0974922	-5.25353	1.49211e-07	3.07004e-06	1566.93	1226.02	1634.19	1430.82	1776.73	1358.99	1224.38	1004.33	1113.85	1033.53	985.772	941.002
Ebp	400.789	-0.44831	0.0853479	-5.25273	1.49858e-07	3.07936e-06	528.889	431.872	437.207	422.074	501.173	455.846	371.356	310.67	352.484	346.685	351.364	299.845
Ssrp1	4394.21	0.199851	0.0380647	5.2503	1.51848e-07	3.11621e-06	4031.14	3967.01	4114.69	4013.82	4177.84	4238.42	4724.96	4436.98	4815.82	4618.85	4801.98	4789.01
Skap2	153.733	0.869591	0.165697	5.24807	1.53703e-07	3.15021e-06	109.199	100.667	130.375	112.867	124.036	75.9743	224.998	125.287	178.886	210.837	228.387	223.289
Rad17	540.989	0.346433	0.0660237	5.24711	1.54503e-07	3.16254e-06	489.42	471.02	464.181	486.737	486.925	459.645	620.383	580.596	600.986	671.634	543.639	616.702
Mrm1	1065.2	-0.509237	0.0970772	-5.24569	1.55699e-07	3.18292e-06	1160.4	1204.89	1332.97	1222.72	1319.14	1267.82	889.071	972.754	890.023	894.426	995.532	632.651
Trim37	10913	0.251176	0.0478978	5.24399	1.57138e-07	3.20821e-06	9406.86	10877	9671.37	9597.19	9972.33	10257.5	11812.4	12174.2	12000.3	11422.1	11346.1	12419.1
Ldha	39641.8	-0.517024	0.0986375	-5.24166	1.59142e-07	3.24494e-06	44918.8	39532.1	50692.4	39176.5	52842.7	52857.2	34472.8	33024.7	34394.5	34374	26154.2	33261.5
Pcgf3	4339.1	0.33397	0.0637621	5.23775	1.62544e-07	3.31007e-06	3654.86	4299.46	3643.76	3812.78	3618	3999.1	4641.95	4905.53	4676.59	4947.05	4474.04	5396.14
Kars	2999.57	-0.34651	0.066193	-5.23485	1.65123e-07	3.35828e-06	3074.66	3548.19	3190.82	3475.35	3222.42	3634.42	2495.73	3004.84	2721.18	2610.46	2459.55	2557.19
Tmem168	1078.45	0.366568	0.0700327	5.23424	1.65669e-07	3.36507e-06	917.005	975.596	911.503	1048.72	828.024	971.522	1306.3	1194.81	1109.44	1275.89	1146.81	1255.73
Lrrc28	932.821	0.314386	0.0600844	5.2324	1.67324e-07	3.39434e-06	735.446	901.028	824.96	814.756	880.824	824.321	1001.57	1008.4	1060.1	1016.15	1037.5	1088.8
Zfp369	1010.77	-0.394412	0.0753966	-5.23117	1.68444e-07	3.4127e-06	1003.84	1253.36	1190.24	1094.57	1110.46	1231.73	821.353	977.847	870.636	878.124	783.738	913.357
Rpa1	1286.87	0.328751	0.0628609	5.22981	1.69687e-07	3.42914e-06	1106.46	1152.07	1137.41	1051.07	1204.32	1190.9	1384.94	1287.5	1518.33	1399.78	1431.81	1577.91
Clic4	1476.76	-0.502987	0.096175	-5.22991	1.6959e-07	3.42914e-06	1461.68	1936.28	1709.49	1765.89	1749.91	1763.55	1092.22	1519.74	1193.16	1321.53	1150.72	1056.9
Snx32	1928.69	0.303983	0.0581411	5.22838	1.71004e-07	3.45137e-06	1877.43	1723.14	1643.18	1709.46	1749.08	1658.14	2219.4	2035.14	2149.27	2061.64	2350.24	1968.13
Rev1	725.052	0.300558	0.0574939	5.22765	1.71674e-07	3.46049e-06	652.56	672.353	650.752	647.807	629.399	644.832	835.552	716.069	823.932	809.656	791.546	826.168
Aggf1	1996	0.287231	0.0549594	5.22624	1.72995e-07	3.47829e-06	1720.86	1965.48	1710.61	1757.66	1696.28	1930.7	2200.83	2109.5	2235.63	2118.15	2281.92	2224.38
Rfc5	463.741	0.42351	0.0810346	5.22628	1.72953e-07	3.47829e-06	399.956	382.782	393.374	415.02	411.498	375.123	577.787	499.109	532.251	468.405	492.886	616.702
Cinp	1768.66	0.272606	0.0521872	5.22362	1.75456e-07	3.52333e-06	1706.39	1596.37	1560.01	1643.62	1582.3	1527.08	2031.54	1779.48	1928.09	1849.71	1996.92	2022.36
Cmc2	155.238	-0.586653	0.112351	-5.22161	1.77377e-07	3.5574e-06	185.506	171.506	183.2	209.274	177.673	191.835	149.635	130.38	106.627	104.332	132.738	120.151
Qtrt2	416.417	-0.498657	0.0955377	-5.21947	1.79432e-07	3.59406e-06	539.415	480.341	454.065	556.103	473.516	424.506	340.774	326.967	355.128	324.949	305.492	415.742
Zscan21	1570.77	0.305509	0.0585409	5.21872	1.80163e-07	3.60418e-06	1393.27	1375.16	1438.62	1550.74	1292.32	1385.58	1780.33	1614.47	1801.19	1743.21	1835.88	1638.51
Zfyve28	656.121	0.383483	0.0735123	5.21659	1.82249e-07	3.64131e-06	578.884	567.958	648.504	486.737	543.915	590.7	749.266	723.199	710.256	700.978	791.546	781.51
Syt13	1916.23	-0.504323	0.09671	-5.2148	1.84017e-07	3.67201e-06	2264.23	2205.34	2154.56	1862.3	2629.06	2368.5	1548.77	1726.51	1510.4	1843.19	1291.26	1590.67
Lars2	7773.63	0.635264	0.121929	5.21013	1.8871e-07	3.76094e-06	6144.06	6183.54	6791.88	4761.56	7162.24	5491.04	8125.06	7247.27	10665.3	10835.3	8890.5	10985.8
Lpgat1	4912.82	-0.514524	0.0987623	-5.20972	1.89128e-07	3.76455e-06	5366.52	6675.06	5293.68	5479.91	5843.94	6015.27	3591.23	4600.97	3827.1	4248.25	3245.24	4766.68
Arl15	2475.31	0.398156	0.0764401	5.20873	1.90137e-07	3.7799e-06	2033.99	2393.01	2000.59	2035.13	2073.41	2273.53	2691.24	2784.83	2749.38	2798.48	2522.99	3347.2
Suco	2931.03	-0.475494	0.0913285	-5.20641	1.9253e-07	3.82268e-06	3398.31	3266.69	3704.45	3761.04	3353.16	2976.29	2516.49	2386.56	2455.05	2911.5	2504.45	1938.36
St13	8310.25	0.294052	0.0565118	5.20338	1.95698e-07	3.88074e-06	7286.04	8124.17	6888.53	7496.22	7137.1	7858.59	9319.95	9403.62	8805.94	9772.39	8393.71	9236.71
Marveld1	179.944	0.550286	0.10578	5.20217	1.96979e-07	3.90127e-06	147.352	152.864	143.862	126.975	132.417	170.942	235.92	207.792	183.292	210.837	232.291	214.782
Mapk3	7919.11	0.230883	0.0443935	5.20083	1.98404e-07	3.9246e-06	7512.33	6846.57	7682.02	7010.66	7330.7	7344.82	8681	8064.18	8864.98	8431.29	8389.8	8870.94
Cnot8	1807.67	0.276344	0.0531398	5.20033	1.98938e-07	3.93026e-06	1580.09	1675.91	1615.08	1516.65	1692.92	1724.62	1865.52	1982.18	2035.6	1942.09	1917.86	2143.57
Gne	1190.28	-0.364129	0.0700297	-5.19963	1.99684e-07	3.93836e-06	1184.08	1426.11	1322.86	1373.21	1341.77	1387.48	962.25	1160.17	1026.61	988.976	1138.03	971.837
Ankrd13b	4879.64	-0.409034	0.0786683	-5.19948	1.99844e-07	3.93836e-06	5446.77	5357.7	5744.38	5919.62	5643.64	5290.66	3628.37	4750.7	3999.82	3652.69	4703.4	4417.93
Kdelr3	84.3001	-1.46308	0.281418	-5.19897	2.00391e-07	3.94424e-06	74.9918	137.329	94.4096	157.543	96.3794	181.389	32.7667	75.3757	43.1793	60.8601	36.1125	21.2656
Fbxo44	2013.56	-0.317417	0.0610731	-5.19733	2.0217e-07	3.97434e-06	2406.32	2138.23	2190.53	2226.76	2324.84	2120.63	1933.24	1812.07	1741.27	1863.84	1838.81	1566.21
Vegfa	3339.41	-0.528044	0.101703	-5.19201	2.08036e-07	4.0846e-06	3621.97	3212.63	4860.97	3766.92	4713.37	3488.17	2871.46	2615.74	2893.9	2698.49	2530.8	2798.55
Shisa4	1994.36	-0.270673	0.0521718	-5.18812	2.1243e-07	4.16573e-06	2251.07	2182.35	2164.68	2285.55	2175.66	2028.51	1712.61	1939.4	1824.11	1823.63	1679.72	1864.99
Mta1	2221.1	-0.358029	0.0690353	-5.18616	2.14671e-07	4.20447e-06	2232.65	2675.74	2520.96	2433.69	2531.84	2572.68	1709.33	2214.42	1850.54	1937.74	1972.52	2001.09
Dusp3	2660.73	-0.568923	0.10977	-5.18288	2.1849e-07	4.27401e-06	2826.01	3791.15	2903.1	3188.48	2813.44	3548	1725.71	2721.67	2198.62	2135.54	2064.27	2012.79
Exoc3	4811.91	-0.321368	0.0620132	-5.18224	2.19232e-07	4.28326e-06	4786.32	5714.38	5225.12	5484.61	5153.36	5706.62	4117.69	4644.77	4511.8	4052.63	3985.06	4360.51
Aaas	722.157	0.337123	0.0650674	5.18113	2.20542e-07	4.30356e-06	657.823	633.205	622.654	574.914	676.332	663.826	745.989	776.166	865.349	769.445	854.011	826.168
Nf1	4966.62	-0.56574	0.109228	-5.17945	2.22547e-07	4.33734e-06	4840.26	7304.54	5578.04	5786.77	5602.57	6453.07	3350.94	5025.72	3777.75	3980.9	3796.69	4102.13
Cd47	9702.75	-0.66832	0.129106	-5.1765	2.26084e-07	4.40088e-06	9989.69	14182.2	10714.4	11211.4	11448.2	13916.6	6319.61	9839.58	7568.72	8614.96	6693.49	5934.16
Adcy6	1499.64	0.327079	0.0631918	5.17597	2.26726e-07	4.40798e-06	1252.49	1366.46	1413.9	1280.33	1325.84	1341.9	1465.77	1735.68	1732.46	1555.19	1726.57	1799.07
Snx2	1936.55	0.227379	0.0439742	5.17074	2.33173e-07	4.52224e-06	1816.91	1781.55	1776.92	1752.96	1825.34	1750.26	2164.79	2035.14	2059.39	2072.5	1977.4	2225.44
Cxcr4	84.7597	1.26626	0.244889	5.17074	2.3317e-07	4.52224e-06	57.8884	52.8189	46.0809	58.7847	43.5802	39.8865	137.62	76.3943	103.102	89.1165	91.7451	220.099
Nabp1	1372.9	0.609024	0.117795	5.17022	2.33825e-07	4.52935e-06	1060.41	1061.97	1099.2	1209.79	1046.76	1046.55	1957.27	1498.35	1577.37	1994.25	1784.15	1138.77
Lactb2	358.611	-0.50651	0.0979834	-5.16934	2.34918e-07	4.54499e-06	499.945	411.987	378.763	429.128	429.098	377.972	354.973	284.187	295.206	303.214	287.924	250.934
Col4a2	1678.94	0.406368	0.0786465	5.16702	2.37851e-07	4.59613e-06	1464.31	1385.72	1581.36	1449.63	1549.61	1235.53	1738.82	1845.69	1842.61	1796.46	2103.31	2154.2
St8sia1	2414.44	-0.284738	0.0551216	-5.16563	2.39633e-07	4.62495e-06	2544.46	2759.63	2672.69	2671.18	2757.29	2503.35	2069.77	2291.83	2262.07	2250.74	1952.02	2238.2
Tmem229b	4538.69	0.260475	0.0504287	5.16522	2.40155e-07	4.6294e-06	3928.52	4208.73	4165.26	3779.86	4361.38	4329.59	4821.08	4897.38	4962.1	4827.51	4853.71	5329.16
Lsm14b	4084.48	-0.328969	0.0637506	-5.16024	2.46629e-07	4.74844e-06	4537.66	4777.31	4306.88	4509.96	4611.96	4542.31	3308.35	3895.09	3600.63	3662.47	3211.08	4050.03
Ptpn12	1470.44	0.304875	0.0591055	5.15814	2.49413e-07	4.79623e-06	1344.59	1302.45	1314.99	1281.51	1390.38	1258.32	1679.84	1520.76	1594.11	1811.67	1493.3	1653.4
Pip4p2	1930.87	0.410327	0.0796463	5.15187	2.579e-07	4.95343e-06	1730.07	1784.66	1521.79	1557.79	1595.71	1755.01	2232.51	2257.2	1980.96	2513.74	1883.7	2357.29
Ercc6l2	434.919	-0.388714	0.0755334	-5.14625	2.65743e-07	5.09791e-06	467.054	502.09	532.74	465.575	516.258	473.89	369.172	333.079	407.119	398.851	352.34	400.856
Adam15	2214.35	-0.320506	0.0623269	-5.14234	2.71336e-07	5.19891e-06	2501.04	2362.56	2599.64	2553.61	2356.68	2386.54	1805.45	2159.41	1883.15	1949.7	2169.68	1844.79
Zfp330	1682.46	-0.506467	0.0985835	-5.13745	2.78495e-07	5.31685e-06	2122.14	1766.64	2151.19	2145.64	1992.96	1673.33	1482.15	1297.68	1471.62	1551.93	1457.19	1077.1
Ppp1r18	779.697	0.552772	0.107597	5.13745	2.78494e-07	5.31685e-06	494.683	636.312	712.568	546.698	712.369	686.618	778.756	957.475	940.252	920.509	869.627	1100.49
Mkrn3	1205.19	0.503723	0.0980493	5.13745	2.78494e-07	5.31685e-06	1184.08	904.135	1007.04	1013.45	913.509	962.974	1725.71	1166.29	1276.87	1467.16	1403.51	1437.55
Atf5	1820	-0.550092	0.10713	-5.13483	2.824e-07	5.38491e-06	2172.13	2048.75	2144.45	2324.35	2274.55	2014.27	1387.13	1623.63	1442.54	1533.46	1823.19	1051.58
Triap1	804.72	0.309574	0.0603179	5.13237	2.86113e-07	5.44505e-06	681.504	752.514	755.277	691.308	705.665	722.706	986.279	845.43	924.39	858.562	869.627	863.383
Kctd4	261.208	1.12363	0.218934	5.13229	2.86239e-07	5.44505e-06	239.447	119.93	174.208	170.476	169.292	114.911	428.152	195.569	274.938	417.326	323.06	507.184
B3galt2	2524.86	-0.521868	0.101697	-5.1316	2.87296e-07	5.45862e-06	2819.43	3026.21	2982.9	3329.56	2810.09	2890.82	2043.55	2072.83	2014.45	2755.01	1855.4	1698.06
Ankle2	1421.21	0.259239	0.050562	5.12714	2.94178e-07	5.5694e-06	1278.81	1314.88	1227.33	1255.64	1319.98	1362.79	1532.39	1505.48	1616.14	1657.35	1484.51	1499.22
Kctd21	497.313	0.405438	0.0790769	5.12714	2.94178e-07	5.5694e-06	405.219	452.378	448.446	418.547	408.146	434.003	575.602	506.239	627.422	496.662	618.792	576.297
Igip	522.931	-0.884161	0.172434	-5.12753	2.93564e-07	5.5694e-06	685.451	769.291	533.864	670.145	638.618	771.139	342.958	441.05	316.355	440.149	196.178	469.969
Lmnb1	1037.99	0.364271	0.0710713	5.12542	2.96869e-07	5.61365e-06	972.262	852.559	849.687	911.163	951.222	910.742	1191.62	1084.8	1181.7	1135.69	1060.93	1353.55
Aldh3a2	1803.81	-0.243515	0.0475208	-5.12439	2.98507e-07	5.63791e-06	1930.05	2000.28	1967.99	1929.31	2001.34	1905.06	1614.31	1720.4	1787.98	1585.62	1572.36	1631.07
Zhx1	2046.65	0.523296	0.102232	5.11872	3.07622e-07	5.80317e-06	1889.27	1645.46	1516.17	1651.85	1686.22	1688.53	2612.6	2056.53	2341.38	2188.79	2133.56	3149.43
Zkscan8	952.38	0.331041	0.0647205	5.11493	3.13858e-07	5.91378e-06	823.594	894.193	833.952	812.404	870.767	820.523	1168.68	1027.76	959.639	1133.52	992.604	1090.92
Usp8	1778.67	-0.405103	0.0792414	-5.11227	3.18308e-07	5.99052e-06	1751.12	2321.55	1916.29	2086.86	1979.55	2100.69	1399.14	1713.27	1446.95	1564.97	1637.75	1425.86
Rassf3	477.528	-0.550364	0.10766	-5.11203	3.18712e-07	5.99103e-06	578.884	609.592	573.201	493.791	502.849	646.731	348.42	500.128	408.001	360.813	359.172	348.756
Pacc1	749.578	0.428569	0.0839008	5.10804	3.25514e-07	6.11165e-06	576.253	641.905	694.585	537.292	700.636	679.97	835.552	827.095	905.885	978.108	815.946	801.713
Tspan13	5913.11	-0.336653	0.0659408	-5.10538	3.30134e-07	6.18379e-06	6597.96	6812.39	6227.66	6876.63	6863.89	6218.5	5147.65	5480.02	5118.07	6017.54	4639.96	4957.01
Sema4c	1221.43	0.351368	0.0688216	5.1055	3.29921e-07	6.18379e-06	1069.62	1051.41	1205.97	946.434	1123.03	1043.7	1285.55	1271.2	1370.28	1393.26	1386.91	1509.86
Ube2e3	5480.93	0.585062	0.114701	5.10075	3.38311e-07	6.32948e-06	4858.68	3737.09	4500.19	4450	4564.19	4199.48	7747.15	5134.71	6390.54	6083.83	5686.25	8419.05
Metrnl	164.146	-0.766895	0.150359	-5.10041	3.38921e-07	6.33343e-06	190.769	170.263	247.263	174.003	251.424	207.03	93.9313	140.565	127.776	132.588	92.7212	141.416
Fam131a	5300.14	0.341134	0.0669042	5.09885	3.41724e-07	6.37831e-06	4804.74	4644.95	4586.74	5067.24	4327.01	4630.63	6096.8	5739.76	5363.05	5712.15	6909.19	5719.38
Sap18	1882.52	0.236094	0.0463214	5.09686	3.45341e-07	6.43603e-06	1770.86	1742.4	1658.91	1863.47	1650.18	1690.43	2115.64	2032.09	2031.19	1961.65	1997.9	2075.52
Sae1	4506.79	0.207336	0.0406805	5.0967	3.45626e-07	6.43603e-06	4103.5	4329.28	4147.28	4240.73	4140.96	4138.7	4722.78	4756.82	5110.14	4697.09	5062.58	4631.64
Vsig10l	104.466	-0.71727	0.140793	-5.09451	3.49638e-07	6.5031e-06	123.671	139.193	130.375	131.678	105.598	149.1	58.9801	90.6545	88.1211	85.8562	66.3688	83.9991
Mkln1	3539.03	-0.357495	0.0702088	-5.09188	3.54526e-07	6.58631e-06	3606.18	4437.41	3676.36	4038.51	3883.67	4204.23	2976.31	3472.37	3054.28	3123.43	2784.56	3211.1
Jpt2	1581.2	0.318544	0.0625629	5.09158	3.551e-07	6.58927e-06	1291.96	1403.74	1418.39	1520.17	1494.3	1313.41	1825.11	1613.45	1805.6	1889.92	1652.39	1745.9
Myo9a	6525.44	-0.32321	0.0635079	-5.0893	3.59396e-07	6.6612e-06	6621.64	7979.38	7317.87	7120	7551.95	6923.16	5499.35	6251.09	5761.36	6002.32	5184.58	6092.59
Slain1	1323.5	0.512243	0.100678	5.08795	3.61951e-07	6.70073e-06	1172.24	1081.23	1057.61	1065.18	1078.61	1091.18	1559.7	1312.96	1495.41	1484.55	1390.82	2092.53
Elp1	4155.35	-0.33776	0.0663909	-5.08744	3.62921e-07	6.71087e-06	4498.19	4992.32	4467.6	4500.56	4712.53	4662.92	3357.5	3819.71	3695.8	3371.21	3513.64	4272.26
Bivm	1213.27	-0.408419	0.0802846	-5.08714	3.635e-07	6.71376e-06	1435.37	1312.39	1526.29	1344.99	1440.66	1245.03	1076.93	1006.37	1127.07	1062.88	852.059	1129.2
Slc17a7	5780.65	0.434963	0.08557	5.08313	3.71269e-07	6.84929e-06	4750.79	5179.36	4931.78	5343.53	5090.51	4198.53	6109.9	6489.44	6342.07	5918.64	8113.59	6899.62
Cbx5	13945.7	0.309674	0.061056	5.07197	3.93714e-07	7.25494e-06	12193.4	13000.9	12541.9	11615.9	13251.7	12118.9	15897.3	14690.1	15404.4	15853	13637.8	17143.3
Nalf2	711.264	0.544096	0.10728	5.07172	3.94246e-07	7.25631e-06	549.94	562.366	651.876	554.927	628.561	524.223	812.615	715.05	868.874	789.007	761.29	1116.44
Mtf2	998.116	0.493698	0.0973656	5.07056	3.96646e-07	7.29205e-06	881.482	766.184	785.623	834.743	861.548	844.265	1359.82	1004.33	996.649	1390	1038.48	1214.26
Ppt2	360.684	0.347818	0.0686292	5.06808	4.01844e-07	7.37906e-06	315.755	293.922	324.814	313.91	331.042	327.639	400.846	414.566	418.575	379.289	406.997	400.856
Mindy3	1576.74	0.402721	0.0794669	5.06778	4.02485e-07	7.3823e-06	1332.75	1397.53	1371.19	1332.06	1397.92	1315.31	1798.89	1590.02	1776.52	1643.22	1730.47	2235.01
Rassf5	350.156	-0.539593	0.106529	-5.06522	4.07924e-07	7.46482e-06	386.8	434.979	421.472	332.721	486.925	423.557	270.872	319.837	292.562	322.776	237.171	272.2
Acap2	2445.68	-0.356236	0.0703273	-5.06541	4.0753e-07	7.46482e-06	2736.54	3032.43	2636.73	2661.77	2465.64	2940.21	2199.74	2379.43	2047.93	2063.81	1926.65	2257.34
Prkcg	1518.25	0.794454	0.15686	5.06475	4.08938e-07	7.47477e-06	1082.78	1314.26	1031.76	1078.11	949.546	1205.14	1547.68	1894.58	1883.15	1370.44	1828.07	3033.54
Slc25a40	431.481	0.444597	0.0878104	5.06315	4.12388e-07	7.52915e-06	377.59	364.761	350.664	382.101	331.88	386.519	466.38	506.239	475.854	561.869	416.757	557.158
Vat1	8099.65	0.44939	0.0888363	5.05862	4.22293e-07	7.70116e-06	6471.66	7531.97	6197.32	7450.37	6666.94	6769.31	9157.21	10204.2	9067.66	9659.36	10687.3	7332.37
Thra	40542.3	0.342485	0.0677302	5.05661	4.26785e-07	7.77414e-06	37778.8	33114.3	37522.2	32804.2	36727.2	36571.2	46111.5	42173.7	44866.8	40438.3	46805.6	51593.5
Tcf20	5933.27	0.216938	0.0429326	5.05298	4.34965e-07	7.91408e-06	5337.57	5594.45	5634.23	5491.67	5647.83	5218.49	6374.22	6118.67	6207.25	6230.55	6479.75	6864.53
Strada	643.107	-0.328759	0.0650653	-5.05275	4.35491e-07	7.91457e-06	757.812	696.588	720.436	710.119	702.312	713.209	550.481	582.634	615.966	495.575	566.087	606.069
Mob3b	49.8329	1.30916	0.259122	5.05229	4.36539e-07	7.92455e-06	27.6285	18.642	22.4785	43.5007	26.8186	34.1884	80.8246	66.2084	50.229	43.4715	106.385	77.6194
Hmgb2	313.269	-0.834869	0.16545	-5.04606	4.51006e-07	8.17784e-06	477.579	280.872	430.463	396.209	482.735	341.884	282.886	209.83	220.303	178.233	166.898	291.339
Psd2	3329.68	-0.283785	0.056249	-5.04515	4.53154e-07	8.20742e-06	3745.64	3454.98	3892.15	3505.92	3860.2	3480.57	2762.24	3032.34	3104.51	3034.31	2850.93	3232.37
H2-Bl	32.3675	-1.39196	0.275914	-5.04491	4.53746e-07	8.20877e-06	34.2068	35.4197	51.7005	64.6632	51.123	44.6349	24.0289	19.3532	22.0303	17.3886	18.5442	5.3164
Sync	15.7165	-1.70098	0.337477	-5.04028	4.64848e-07	8.40006e-06	17.1034	27.3415	23.6024	22.3382	26.8186	26.591	2.18445	8.14872	4.40605	8.6943	10.7361	10.6328
Slc10a3	93.4943	0.691404	0.137182	5.04006	4.65397e-07	8.40042e-06	71.0448	75.8106	67.4355	72.893	69.5608	72.1756	124.514	92.6917	136.588	120.633	123.954	94.6319
Tax1bp3	256.397	0.558796	0.110879	5.03967	4.66335e-07	8.40779e-06	226.291	182.07	228.157	181.057	216.225	212.728	303.638	258.722	318.117	255.395	356.244	338.123
Unc5c	3537.85	-0.786477	0.156136	-5.03712	4.72598e-07	8.51104e-06	3478.57	5896.45	3635.9	4426.49	3970.83	5463.5	1851.32	3544.69	2398.66	2762.61	2376.59	2648.63
Lix1l	1594.76	0.569401	0.113052	5.03661	4.73855e-07	8.52402e-06	1290.65	1163.26	1419.52	1175.69	1538.72	1116.82	1971.47	1618.54	2079.66	1835.58	1563.57	2363.67
Haus6	302.384	0.464734	0.0922868	5.03576	4.75965e-07	8.5523e-06	249.973	290.815	231.528	222.206	258.129	266.86	341.866	380.953	346.316	365.16	301.588	373.211
Slc39a10	4651.65	0.384527	0.0763808	5.03434	4.7951e-07	8.60625e-06	3954.83	3948.99	4422.64	3889.2	4275.89	3719.89	5609.66	4782.28	5335.73	5662.16	4442.81	5775.73
Raver2	202.614	-0.514264	0.102296	-5.02723	4.97614e-07	8.9211e-06	227.607	247.317	220.289	277.464	242.206	215.577	155.096	188.439	185.054	165.192	144.45	162.682
Egfl7	179.788	-0.532298	0.105929	-5.02507	5.03247e-07	9.01192e-06	242.079	188.905	222.537	209.274	210.358	205.131	156.188	174.179	149.806	134.762	136.642	127.594
Elp6	524.677	-0.366085	0.0728592	-5.02456	5.04587e-07	9.02574e-06	644.666	541.238	605.795	585.496	545.591	626.788	454.365	424.752	443.249	440.149	493.862	490.172
Rgs14	272.94	0.855022	0.170276	5.02139	5.12985e-07	9.16564e-06	232.869	180.827	222.537	157.543	191.921	181.389	375.725	277.057	333.979	251.048	325.988	544.399
Hdac6	3198.69	-0.287848	0.0573382	-5.02018	5.16244e-07	9.20316e-06	3331.21	3722.18	3466.18	3583.51	3473.85	3521.41	2608.23	3242.17	2928.26	2757.18	2855.81	2894.25
Lrrc8c	898.073	-0.571959	0.113927	-5.02038	5.15681e-07	9.20316e-06	956.474	1245.28	1010.41	1035.79	1086.15	1106.38	584.34	885.155	765.772	828.132	568.039	704.954
Mtus1	710.12	0.643983	0.128287	5.01985	5.17117e-07	9.20839e-06	561.78	490.283	542.855	497.318	717.398	514.726	1057.27	678.381	852.131	817.264	744.697	1047.33
Dcun1d2	1388.77	0.40037	0.0797874	5.01796	5.22219e-07	9.28883e-06	1268.28	1134.67	1248.68	1228.6	1196.78	1109.22	1828.38	1381.21	1567.67	1748.64	1553.81	1399.28
Chodl	365.344	-0.951764	0.189743	-5.01607	5.27379e-07	9.35966e-06	389.431	581.008	358.532	604.307	351.156	604.945	227.183	355.488	230.877	279.304	238.147	163.745
Gprasp1	30450.8	0.177081	0.0353025	5.01611	5.27286e-07	9.35966e-06	28446.9	30203.1	27327.1	28203.7	29555.8	27758.2	32346.2	31849.3	32210.9	32903.6	31898	32706.5
Zfp740	1899.07	0.284891	0.0568072	5.01505	5.302e-07	9.39922e-06	1807.7	1583.95	1826.38	1610.7	1762.49	1686.63	2112.36	1895.6	2110.5	2067.07	2152.11	2173.34
Grik1	3557.19	-0.398935	0.0795643	-5.014	5.33103e-07	9.44014e-06	4540.29	3997.46	3530.25	4205.46	3680.02	4323.89	3430.68	3242.17	2940.6	2866.94	3202.3	2726.25
Cyth3	1984.42	-0.390051	0.0777959	-5.01377	5.33744e-07	9.44097e-06	2180.02	2235.17	2334.39	2170.33	2267.85	2319.12	1525.84	1815.13	1896.37	1550.85	1526.48	1991.52
Tafa2	4399.67	-0.390614	0.0779268	-5.01258	5.37051e-07	9.48889e-06	5409.93	4772.96	5004.84	4562.87	5257.28	4942.13	3934.19	3723.97	3822.69	3751.59	3157.4	4456.2
Kcnv1	1268.39	0.696377	0.138964	5.01119	5.40951e-07	9.54718e-06	1123.56	866.851	948.592	900.581	1070.23	899.346	1774.86	1282.41	1406.41	1464.99	1218.06	2264.78
Ampd3	139.563	-0.653888	0.130625	-5.00583	5.56221e-07	9.80579e-06	161.824	196.362	139.367	156.367	196.949	170.942	100.485	130.38	116.32	99.9844	88.8171	116.961
Rps6ka2	3195.49	0.456268	0.0911965	5.00313	5.64063e-07	9.93302e-06	2383.95	3062.25	2586.15	2428.98	2804.22	2894.62	3478.73	3896.11	3598.86	3251.67	3454.11	4506.18
AI854703	1071.89	-0.316475	0.0632659	-5.00231	5.66486e-07	9.96464e-06	1148.56	1121	1198.1	1148.65	1341.77	1176.65	902.177	998.218	1025.73	922.682	972.108	906.977
Jarid2	2031.45	-0.577303	0.11544	-5.00088	5.70692e-07	1.00275e-05	1955.05	2930.52	2257.96	2343.16	2351.66	2754.07	1402.42	2104.41	1594.11	1655.18	1610.42	1418.41
Jazf1	3514.72	0.336195	0.0672344	5.00035	5.7227e-07	1.00441e-05	3003.62	3428.88	2794.08	3186.13	2968.48	3255.5	3863.2	3914.44	3790.97	4030.89	3544.88	4395.6
Ctxn1	6462.01	0.357611	0.0715302	4.99944	5.74962e-07	1.00802e-05	5948.03	5536.04	5734.26	5583.37	5846.46	5344.79	7047.03	6541.39	7363.4	6525.07	7412.81	8661.47
Chchd6	2452.52	-0.293818	0.0587776	-4.99881	5.76852e-07	1.01022e-05	2925.99	2384.31	2798.57	2641.78	2786.62	2678.09	2279.47	2142.1	2254.14	2054.03	2304.36	2180.79
Nasp	2788.41	0.272711	0.0545575	4.99859	5.77497e-07	1.01024e-05	2624.71	2350.75	2483.87	2560.66	2593.02	2545.14	3083.35	2766.49	3002.29	2939.76	3242.31	3268.52
Pikfyve	1739.22	-0.385619	0.0772117	-4.99431	5.90477e-07	1.03181e-05	1770.86	2291.72	1773.55	1970.46	1932.62	2076.95	1394.77	1633.82	1512.16	1558.45	1374.23	1581.1
Adamts4	89.9388	0.739623	0.148117	4.99351	5.92917e-07	1.03467e-05	56.5727	71.4608	83.1704	75.2444	50.2849	67.4272	114.684	110.008	98.6956	114.113	101.505	136.1
Tbc1d32	644.446	-0.31083	0.0622487	-4.99335	5.93415e-07	1.03467e-05	745.971	716.473	749.658	686.605	669.627	714.159	631.306	597.912	562.212	571.65	546.567	541.209
Rgs8	3483.16	0.431327	0.0863987	4.99229	5.96682e-07	1.03922e-05	3173.34	2970.91	2801.94	2983.91	2822.66	3046.57	4556.76	3717.85	3907.29	3749.42	4755.13	3312.12
Marchf6	13811.1	0.394193	0.0789676	4.99182	5.98117e-07	1.04058e-05	10873.8	14695.5	10881.8	12168.4	11247.1	11741.8	14676.2	16560.2	15627.4	16262.7	14533.8	16464.9
Nxpe3	327.514	0.542261	0.108646	4.99106	6.00484e-07	1.04355e-05	218.397	276.522	298.964	238.666	322.661	241.218	405.215	355.488	408.882	394.504	334.772	434.881
Derl2	1240.41	-0.370608	0.0742775	-4.98951	6.05319e-07	1.05081e-05	1448.53	1451.59	1403.78	1517.82	1386.19	1186.15	1122.81	1041	1086.53	1197.64	1090.21	952.698
Tnfrsf21	3163.78	0.221852	0.0444731	4.98846	6.0863e-07	1.0554e-05	2947.05	2967.8	2824.42	3026.24	2836.07	2924.06	3361.87	3384.78	3353.01	3354.91	3264.76	3720.41
Homer3	249.784	0.551981	0.110733	4.98478	6.20329e-07	1.07451e-05	182.875	234.267	210.174	188.111	230.472	165.244	294.901	289.28	252.907	336.904	323.06	289.212
Thap6	104.366	-0.713428	0.143142	-4.98407	6.22597e-07	1.07727e-05	148.668	132.979	100.029	134.029	152.531	110.163	78.6402	90.6545	87.2399	69.5544	81.985	65.9233
Oxct1	34072.3	-0.258757	0.0519251	-4.98328	6.25162e-07	1.08053e-05	37923.5	37206.2	37200.8	37148.4	36662.7	36577.8	32288.3	32331.1	32163.3	32847.1	28954.4	27564.5
Zfp629	1817.82	-0.298299	0.0598695	-4.98248	6.27729e-07	1.08379e-05	1868.22	2071.74	1998.34	1985.75	2028.16	2076	1437.37	1815.13	1660.2	1660.61	1627.01	1585.35
Coasy	1507.23	0.313847	0.0630452	4.97812	6.4204e-07	1.10729e-05	1303.8	1278.84	1426.26	1368.51	1289.81	1399.83	1775.96	1592.06	1728.05	1519.33	1834.9	1569.4
Fgfr1op2	901.519	-0.329392	0.0662239	-4.97392	6.56133e-07	1.12915e-05	1093.3	941.419	984.558	1040.49	964.632	1002.86	879.241	738.478	792.208	865.083	764.218	751.738
Top1	3035.02	-0.452954	0.0910637	-4.97404	6.55721e-07	1.12915e-05	3241.75	3921.65	3157.1	3500.04	3312.94	3908.88	2196.46	2997.71	2458.58	2762.61	2257.52	2704.98
Siae	752.754	0.368592	0.0741471	4.9711	6.65755e-07	1.14447e-05	627.563	683.538	628.274	636.05	664.599	698.964	881.425	775.147	875.923	839	748.601	973.964
Fam234b	6376.61	0.21999	0.0442643	4.96991	6.69841e-07	1.15024e-05	5571.76	6138.18	5906.22	5519.88	6195.94	6006.72	6544.61	7132.17	6892.83	6913.05	6817.45	6880.48
Stx3	772.987	0.371521	0.0747671	4.96904	6.72856e-07	1.15333e-05	689.398	677.946	653	688.957	704.826	629.637	918.561	772.091	853.893	963.98	951.612	771.941
Purg	1223.92	-0.471752	0.0949395	-4.96897	6.73089e-07	1.15333e-05	1298.54	1545.42	1285.77	1397.9	1447.37	1555.57	879.241	1190.73	994.887	1030.27	871.579	1189.81
Cyp11a1	12.5641	-2.15365	0.433567	-4.96729	6.78954e-07	1.16212e-05	27.6285	14.2922	31.4699	17.6354	20.952	11.3961	6.55335	1.01859	6.16848	4.34715	2.92804	6.37968
Ralgps1	4876.59	0.376893	0.0758837	4.96672	6.8094e-07	1.16427e-05	4116.65	4642.47	4170.88	4019.7	4261.64	4244.12	5117.07	5537.06	5534	4869.89	5314.39	6691.22
Vgll2	18.8904	-2.01224	0.405396	-4.96365	6.91796e-07	1.18156e-05	32.8911	35.4197	24.7263	51.7305	22.6282	14.2452	7.64557	9.16731	3.52484	10.8679	11.7121	2.12656
Nudt18	787.982	-0.330235	0.0665755	-4.96031	7.0382e-07	1.2008e-05	813.069	863.123	886.776	852.378	883.338	966.773	634.582	786.352	701.444	692.283	680.281	695.385
Washc4	1804.54	0.349021	0.0704283	4.95569	7.20756e-07	1.22838e-05	1584.04	1598.86	1667.9	1604.82	1611.63	1455.86	2180.08	1817.16	1877.86	2303.99	2080.86	1871.37
Hipk4	75.4269	-0.838238	0.169368	-4.94921	7.45145e-07	1.26858e-05	82.8856	113.095	102.277	109.34	70.3988	102.565	40.4123	66.2084	61.6848	52.1658	48.8006	55.2905
Rbbp5	1225.3	0.270485	0.0546642	4.94811	7.49364e-07	1.2744e-05	1032.78	1205.51	1086.83	1112.21	1106.27	1113.97	1368.56	1274.26	1369.4	1282.41	1323.47	1427.98
Far2	1242.84	-0.563372	0.113898	-4.94627	7.56484e-07	1.28513e-05	1240.65	1708.22	1385.8	1377.91	1514.41	1664.79	809.338	1258.98	998.412	1065.05	844.251	1046.27
Rufy1	633.287	-0.500918	0.101295	-4.94516	7.60823e-07	1.29112e-05	759.127	672.353	771.012	792.418	729.969	730.303	480.579	495.035	582.48	656.419	518.262	411.489
Gal3st1	28.5486	-1.47159	0.297627	-4.94439	7.63807e-07	1.2948e-05	43.4163	38.5267	55.0723	39.9736	44.4183	30.3897	30.5823	10.1859	14.9806	13.0414	15.6162	6.37968
Atpaf1	600.126	0.362159	0.073282	4.94199	7.73296e-07	1.30949e-05	522.311	505.818	550.723	529.062	536.372	508.078	786.402	621.34	672.364	619.469	710.537	639.031
Itsn2	1155.71	-0.252703	0.0512207	-4.93361	8.07254e-07	1.36554e-05	1191.97	1324.82	1283.52	1235.65	1239.52	1261.17	1056.18	1092.95	1100.63	1070.49	1036.52	975.027
Sel1l	5339.46	-0.513171	0.10403	-4.93293	8.10042e-07	1.3688e-05	5275.74	7736.41	5719.65	6454.56	5875.79	6609.77	3728.85	5190.74	4436.9	4139.57	4012.39	4893.21
Xpc	608.66	0.367481	0.0745167	4.93152	8.15924e-07	1.37727e-05	534.152	492.148	573.201	459.696	590.009	540.367	688.101	639.675	692.632	702.064	736.889	654.98
Nubp1	482.452	0.368927	0.0748132	4.93131	8.16812e-07	1.37731e-05	405.219	449.893	413.604	447.939	359.537	450.148	512.253	545.964	544.588	519.484	571.943	568.854
Apcdd1	324.491	0.468864	0.0951342	4.92845	8.28827e-07	1.39609e-05	292.073	236.753	252.883	259.828	305.062	287.753	397.57	326.967	341.91	371.681	409.925	411.489
Hdhd5	580.412	0.310028	0.0629566	4.92447	8.45887e-07	1.42331e-05	497.314	498.362	514.757	524.359	551.458	523.273	670.626	599.95	663.552	668.374	661.736	591.183
Slc25a42	622.385	0.484046	0.0983284	4.92275	8.53379e-07	1.4344e-05	471.001	567.337	517.005	512.603	491.116	552.713	645.505	784.314	690.869	691.197	915.499	629.461
Mknk1	487.829	-0.401228	0.0815437	-4.92041	8.6363e-07	1.45009e-05	605.197	533.16	570.954	520.832	560.676	541.317	446.72	387.064	429.15	426.021	353.316	479.539
Ptn	9562.19	0.376549	0.076542	4.91951	8.67625e-07	1.45527e-05	9064.8	8154.61	8123.73	8075.84	7647.49	8862.4	11707.6	10440.5	9881.02	11206.9	9276.02	12305.3
Skil	2597.92	0.366683	0.0745687	4.91739	8.77079e-07	1.46802e-05	2173.45	2601.8	2190.53	2082.15	2299.7	2262.14	2893.3	2946.78	2783.74	3121.25	2546.42	3273.84
Azin1	11167.7	0.39934	0.0812071	4.91754	8.76366e-07	1.46802e-05	10050.2	9244.55	9860.19	9251.53	10261.5	9123.57	13945.5	10669.7	12500	12588.3	11491.6	15026.3
Pip5kl1	287.6	-0.414311	0.08427	-4.91647	8.81182e-07	1.47334e-05	331.543	323.749	339.425	312.735	363.727	301.048	253.396	262.796	263.482	234.746	250.835	213.719
Relch	4093.44	0.244161	0.0496836	4.91432	8.90908e-07	1.48803e-05	3482.51	4177.04	3638.14	3722.25	3719.41	3736.99	4389.65	4414.57	4465.09	4618.85	4297.38	4459.39
Rap2b	893.189	0.516435	0.10512	4.91283	8.97707e-07	1.49781e-05	874.904	694.102	647.38	744.214	683.036	768.29	1151.2	933.029	926.153	1010.71	960.396	1324.85
Syt2	115.486	-0.848647	0.172778	-4.91178	9.02521e-07	1.50426e-05	144.721	155.971	144.986	129.326	135.769	178.54	122.329	82.5058	51.9914	73.9015	72.2249	93.5686
Siah3	126.994	0.621141	0.126476	4.91115	9.05426e-07	1.50752e-05	89.4639	86.9958	120.26	114.042	92.189	99.7163	144.174	151.77	148.043	130.414	163.97	182.884
Pnma8c	3895.9	-0.312131	0.0636164	-4.90645	9.27382e-07	1.54247e-05	4189.01	4648.06	4111.32	4158.43	4558.32	4224.17	3295.24	3862.49	3472.85	3749.42	3142.76	3338.7
Morn4	5570.56	0.363223	0.0740963	4.90203	9.48506e-07	1.57595e-05	5246.79	4398.88	5001.46	4827.4	5217.06	4550.86	6684.41	5428.07	6590.58	6222.94	6924.81	5753.4
Kctd13	4097.03	0.284962	0.058146	4.9008	9.5446e-07	1.58418e-05	3549.61	3593.55	3847.19	3662.29	3687.56	3823.41	4351.42	4521.52	4436.01	4137.4	5175.79	4378.58
Pcnp	1864.87	-0.359394	0.0733378	-4.90052	9.55829e-07	1.5848e-05	2057.67	2131.4	1885.95	2260.86	2074.25	2163.37	1703.87	1650.12	1557.1	1909.48	1453.28	1531.12
Rnf44	3674.54	0.307245	0.0627212	4.89858	9.65332e-07	1.59889e-05	3232.54	3529.54	3256.01	3194.36	3111.8	3380.86	3571.57	4358.55	3763.65	4116.75	4301.29	4277.57
Nrp1	1541.86	-0.517786	0.105748	-4.8964	9.76094e-07	1.61503e-05	1523.52	2169.3	1680.27	1894.04	1811.09	1811.99	1061.64	1473.9	1177.3	1210.68	1170.24	1518.36
Rcan2	11239.8	0.513006	0.104782	4.89592	9.78491e-07	1.61731e-05	8445.13	10465	7986.61	10226.2	8298.68	10149.2	13731.4	13675.6	12699.1	14371.7	14879.3	9949.1
Cyb5r2	24.9355	-1.38895	0.283934	-4.89181	9.99142e-07	1.64973e-05	30.2598	48.4691	40.4613	34.0951	30.1709	33.2388	4.3689	18.3346	19.3866	13.0414	14.6402	12.7594
Trpm2	1401.23	-0.565801	0.11585	-4.88393	1.03991e-06	1.71526e-05	1451.16	1795.84	1684.76	1326.18	1781.76	1992.43	1093.32	1377.13	1101.51	1208.51	879.387	1122.82
Far1	3052.97	-0.396258	0.0811429	-4.88346	1.04242e-06	1.71762e-05	3789.06	3282.23	3196.44	3797.49	3439.49	3313.43	2852.89	2504.71	2292.91	3047.35	2390.25	2729.44
Ube2r2	2678.56	0.236444	0.0484355	4.88162	1.05219e-06	1.73191e-05	2332.64	2599.93	2359.12	2393.71	2575.42	2488.16	2733.84	2865.29	2998.76	2975.62	2807.99	3012.27
Plbd2	1292.51	0.297609	0.0609749	4.88085	1.05632e-06	1.73691e-05	1186.71	1194.33	1152.02	1163.94	1086.99	1174.75	1407.88	1456.58	1433.73	1260.67	1398.63	1593.86
Msl2	1324.33	-0.413853	0.0848156	-4.87944	1.06387e-06	1.74752e-05	1562.99	1620.61	1363.32	1449.63	1454.91	1623.95	1056.18	1244.72	1064.5	1182.42	954.54	1314.21
Pik3cd	1401.02	-0.327323	0.067117	-4.87689	1.0777e-06	1.76841e-05	1557.72	1512.48	1676.9	1529.58	1597.38	1484.35	1096.59	1364.91	1305.95	1123.74	1247.34	1315.28
H2-DMa	367.572	-0.448424	0.0919642	-4.87607	1.08218e-06	1.77392e-05	402.587	418.823	382.134	392.682	436.64	510.927	288.347	332.06	297.849	331.47	337.7	279.642
Acp2	2985.69	0.232551	0.0477246	4.87277	1.10047e-06	1.80204e-05	2740.49	2625.41	2888.49	2868.69	2738.01	2618.26	3282.13	3034.38	3281.63	3325.57	3355.53	3069.69
Pou2f2	216.759	0.596661	0.122463	4.87217	1.1038e-06	1.80565e-05	157.877	150.378	171.96	176.354	225.444	152.898	229.367	226.127	248.501	283.651	284.02	294.528
Eipr1	1318.82	0.237571	0.0487916	4.86909	1.12111e-06	1.83207e-05	1269.6	1175.06	1235.19	1168.64	1206	1212.74	1445.01	1361.86	1436.37	1346.53	1508.91	1459.88
Ddah1	7140.5	-0.549393	0.112888	-4.86672	1.13464e-06	1.85227e-05	7232.1	10108.9	7828.13	8153.44	9093.18	8484.43	4692.2	7472.38	5700.55	6353.36	5072.34	5495.03
Nsmaf	911.674	0.284439	0.0584532	4.86609	1.13825e-06	1.85626e-05	884.114	783.584	788.995	871.189	819.644	790.133	1067.1	926.917	995.768	1004.19	1035.55	972.901
Ncald	11779.7	0.367382	0.0755053	4.86565	1.14084e-06	1.85857e-05	10623.8	10579.3	10177.1	9918.15	10067	10361	13580.7	12727.3	13785.7	12274.2	11296.4	15965.1
Smim17	429.27	-0.696656	0.143336	-4.8603	1.1721e-06	1.90754e-05	615.722	400.181	548.475	497.318	560.676	564.109	423.783	297.428	332.216	359.727	216.675	334.933
Gpld1	351.293	-0.399023	0.0821022	-4.86008	1.17338e-06	1.90768e-05	374.959	447.407	378.763	353.884	422.393	414.06	316.745	318.819	277.581	306.474	291.828	312.604
Rngtt	859.128	-0.436297	0.0897885	-4.85916	1.17884e-06	1.91459e-05	974.893	1029.66	947.468	988.759	1047.6	937.333	760.188	791.445	704.087	839	554.375	734.726
Amn	108.108	-0.936686	0.192828	-4.85763	1.18799e-06	1.92747e-05	142.09	138.572	135.995	106.988	140.798	187.087	80.8246	94.7289	62.566	91.2901	78.081	38.2781
Eif3j1	939.182	0.31095	0.0640233	4.85682	1.19285e-06	1.93339e-05	851.222	805.954	854.183	871.189	848.976	800.579	1094.41	915.713	1059.22	1145.47	988.7	1034.57
Cdhr3	64.742	0.86074	0.177247	4.85617	1.1968e-06	1.93782e-05	52.6258	44.7407	33.7177	64.6632	42.7421	38.9368	85.1935	87.5988	81.0714	79.3355	102.481	63.7968
Nol3	231.86	-0.639782	0.131764	-4.85552	1.20073e-06	1.9422e-05	335.49	284.601	270.866	300.978	255.615	247.866	179.125	202.699	142.756	217.357	208.867	136.1
Mtcl1	1102.96	-0.395045	0.081382	-4.8542	1.20871e-06	1.95312e-05	1236.71	1138.4	1276.78	1266.22	1264.66	1338.1	787.494	1102.11	950.826	894.426	1047.26	932.496
Bahcc1	1584.49	0.43752	0.0901397	4.8538	1.2112e-06	1.95515e-05	1338.01	1268.9	1466.72	1292.09	1333.39	1377.98	1565.16	1948.56	1493.65	1793.2	2104.28	2031.93
Cxcl12	276.537	0.683432	0.140904	4.85034	1.23247e-06	1.98747e-05	201.294	185.798	260.75	235.139	235.501	156.697	271.964	269.926	369.227	383.636	357.22	391.287
Micall1	1708.85	-0.509958	0.105192	-4.84787	1.24795e-06	2.01039e-05	1715.6	2197.89	2063.53	2030.42	2014.75	2022.82	1076.93	1818.18	1349.13	1387.83	1393.75	1435.43
Asl	601.069	-0.411641	0.0849273	-4.84698	1.25354e-06	2.01637e-05	755.18	616.427	668.735	630.172	755.111	692.316	505.7	538.834	497.884	566.216	433.349	552.905
Sec23b	1649.58	-0.531711	0.109702	-4.84688	1.2542e-06	2.01637e-05	1640.61	2198.51	1851.1	2044.53	1941.83	2022.82	1214.55	1551.31	1433.73	1524.76	1389.84	981.407
Stk38l	696.622	0.438625	0.0905483	4.8441	1.27185e-06	2.04268e-05	543.361	681.674	519.253	593.725	534.696	671.423	766.742	833.207	707.612	899.86	817.898	790.017
Adamtsl2	271.292	0.540674	0.111667	4.84186	1.28632e-06	2.06383e-05	273.654	190.769	201.182	232.787	227.12	204.181	354.973	287.242	283.75	290.172	339.652	370.021
Ddx18	505.286	-0.305923	0.0632004	-4.84052	1.29497e-06	2.07561e-05	517.049	569.201	551.847	577.266	566.543	568.858	471.841	441.05	482.903	442.322	457.75	416.805
Lrrc26	44.6836	1.4209	0.293591	4.83972	1.3002e-06	2.08189e-05	11.8408	34.7983	19.1067	41.1493	14.2474	23.742	57.8879	87.5988	43.1793	52.1658	88.8171	61.6702
Ythdf1	2669.2	0.283793	0.0586611	4.83785	1.31253e-06	2.09952e-05	2318.17	2685.68	2262.46	2329.05	2260.31	2582.18	2777.53	3002.8	2894.78	3039.74	2855.81	3021.84
Wdr73	930.257	-0.265675	0.0549495	-4.8349	1.33211e-06	2.1287e-05	1070.94	981.81	1068.85	1021.68	962.117	995.263	833.367	871.913	895.31	831.392	839.371	791.08
Fndc3b	1450.57	-0.729045	0.150825	-4.83373	1.34001e-06	2.13917e-05	1469.58	2234.55	1528.54	2090.38	1635.1	1897.46	901.085	1371.02	998.412	1270.45	1264.91	745.359
Fam20b	3616.82	0.247017	0.0511128	4.83278	1.34643e-06	2.14725e-05	3248.33	3412.72	3325.69	3112.06	3391.72	3352.37	3850.09	3881.85	4070.31	3915.69	3575.13	4265.88
Ppp2r5c	6298.32	0.216132	0.0447247	4.8325	1.3483e-06	2.14809e-05	5524.39	6341.99	5673.57	5740.91	5847.29	5826.28	6482.35	6956.97	6857.58	7026.08	6673.97	6628.48
Bach1	1805.91	0.407889	0.0844268	4.83127	1.35663e-06	2.15703e-05	1439.32	1820.7	1340.84	1571.9	1394.57	1740.76	2040.28	2218.49	1869.93	2049.68	2028.15	2156.33
Gm21092	740.5	-0.373795	0.0773676	-4.83142	1.35565e-06	2.15703e-05	768.337	941.419	726.055	873.541	843.948	857.56	640.044	638.656	654.74	607.514	609.032	725.156
Gabra3	3481.7	0.3763	0.0779051	4.83024	1.36371e-06	2.16612e-05	3152.29	2897.58	3002	2853.41	3345.62	2929.76	4129.7	3464.23	3959.28	3829.84	3546.83	4669.92
Tcap	111.411	-1.26084	0.26116	-4.82783	1.38032e-06	2.19031e-05	111.83	173.992	131.499	199.868	111.465	214.627	40.4123	97.7847	55.5163	78.2487	89.7931	31.8984
Wdr59	1603.59	-0.378551	0.0784281	-4.82673	1.38791e-06	2.20016e-05	1624.82	2035.08	1748.83	1835.26	1695.44	1934.5	1211.28	1559.46	1432.85	1296.54	1387.89	1481.15
Ppp1r12c	2398.63	-0.3695	0.0766413	-4.82116	1.42728e-06	2.2603e-05	2678.65	2581.29	2853.64	2833.42	2670.97	2609.72	1984.57	2154.32	2040	2006.21	2549.34	1821.4
Shc2	3024.38	0.297363	0.0616876	4.82047	1.43223e-06	2.26383e-05	2894.42	2514.8	2888.49	2628.85	2788.3	2573.63	3373.88	3143.37	3336.26	3223.41	3758.62	3168.57
Zfp800	371.768	-0.456696	0.0947414	-4.82045	1.43235e-06	2.26383e-05	428.9	484.691	361.904	459.696	398.927	444.45	279.609	310.67	299.612	373.855	308.42	310.478
Wwox	527.988	-0.408258	0.0848041	-4.81413	1.47842e-06	2.33432e-05	589.409	686.645	597.928	530.238	536.372	669.524	440.166	488.923	462.636	455.364	411.877	466.78
Igf1	2825.73	-0.758264	0.157552	-4.8128	1.48832e-06	2.34762e-05	3786.43	3892.44	3079.55	4494.68	2381.83	3675.26	2418.18	2462.95	1718.36	2471.35	2095.5	1432.24
Psph	763.029	-0.749509	0.155873	-4.80846	1.52094e-06	2.39669e-05	830.172	961.925	1000.29	1146.3	884.176	919.289	517.714	663.102	623.016	643.378	660.76	306.224
Yeats4	1724.53	0.453273	0.0942817	4.80764	1.5272e-06	2.40417e-05	1601.14	1277.6	1522.92	1541.33	1479.21	1317.2	2230.32	1692.9	1970.39	1960.56	2358.05	1742.71
Acox3	645.401	0.353656	0.0735845	4.80612	1.53886e-06	2.41773e-05	576.253	597.785	527.121	578.441	511.23	608.744	696.839	768.017	676.77	660.767	796.426	746.422
Fam171a1	2332.79	-0.336157	0.0699423	-4.80621	1.53819e-06	2.41773e-05	2510.25	2823.64	2535.57	2423.11	2708.68	2614.47	1899.38	2228.68	2078.78	2022.51	1825.14	2323.27
Tfdp2	318.978	-0.41773	0.0869208	-4.80587	1.54082e-06	2.41841e-05	388.115	369.732	343.921	340.951	372.108	373.224	314.561	270.945	270.532	234.746	246.931	301.971
Dhx57	3571.98	-0.302518	0.0629664	-4.80443	1.5519e-06	2.4334e-05	3708.8	4156.54	4034.89	3986.78	4073.08	3708.5	2831.05	3347.09	3365.34	3209.28	2961.22	3481.18
Susd6	1285.96	0.511263	0.106428	4.80386	1.55639e-06	2.43804e-05	847.275	1252.74	967.699	985.231	980.555	1323.85	1346.71	1620.58	1484.84	1436.73	1573.33	1611.93
Frzb	179.657	-0.620417	0.129207	-4.80175	1.57286e-06	2.46141e-05	192.084	245.452	183.2	253.95	209.52	220.326	119.052	169.086	133.944	167.365	115.169	146.733
C77080	481.963	-0.52845	0.110089	-4.80022	1.5849e-06	2.47781e-05	527.574	559.259	664.239	509.075	641.132	513.776	320.022	485.868	399.188	424.934	350.388	388.097
St8sia5	488.748	-0.529384	0.110401	-4.79512	1.62581e-06	2.53926e-05	518.364	629.477	539.484	657.213	526.315	593.549	347.327	472.626	398.307	415.153	457.75	309.414
Txndc16	4199.93	-0.32406	0.0675895	-4.79454	1.63049e-06	2.54408e-05	4871.83	4237.32	5054.29	4769.79	4796.34	4292.55	3994.26	3452	3855.3	4000.46	3734.22	3340.82
Dscam	2571.46	-0.471068	0.0982551	-4.79433	1.63216e-06	2.54419e-05	2468.15	3492.88	2896.35	2940.41	2981.89	3142.49	1814.18	2668.71	2160.73	2047.51	2074.03	2170.15
Moxd1	55.8773	-0.797418	0.166358	-4.79339	1.63986e-06	2.55368e-05	84.2013	61.5185	75.3029	74.0687	63.6942	68.3769	44.7812	34.6321	40.5357	45.6451	45.8726	31.8984
Nop56	2768.69	-0.235666	0.0491846	-4.79146	1.65574e-06	2.57589e-05	3098.34	2916.22	2780.59	3293.12	2962.62	2918.36	2586.39	2479.25	2462.1	2575.69	2580.58	2571.01
Epdr1	1008.99	-0.304151	0.0634902	-4.79052	1.66353e-06	2.58548e-05	1060.41	1164.5	1069.98	1212.14	1134.76	1046.55	916.376	945.252	947.302	945.505	844.251	820.852
Taf7l	25.9095	-1.45333	0.303413	-4.78993	1.66836e-06	2.59044e-05	35.5224	24.8559	34.8417	64.6632	40.2279	28.4904	12.0145	18.3346	18.5054	14.1282	9.76012	9.56951
Gxylt2	82.3259	-0.881127	0.183963	-4.7897	1.67032e-06	2.59096e-05	113.145	96.9382	102.277	77.5958	105.598	144.351	75.3635	66.2084	59.9223	60.8601	40.9925	44.6577
Nudt19	2169.94	-0.596522	0.124671	-4.78478	1.71174e-06	2.65261e-05	2964.15	2137.61	2791.83	2766.41	2824.33	2191.86	1990.03	1546.22	1898.13	1871.45	1851.5	1205.76
Reep6	453.874	-0.543534	0.113731	-4.7791	1.76078e-06	2.72594e-05	472.317	575.415	538.36	538.468	595.876	509.028	266.503	439.012	400.951	408.632	378.693	323.237
Tmem120a	1189.84	-0.500182	0.104668	-4.77875	1.7639e-06	2.72812e-05	1377.48	1334.14	1465.6	1483.73	1444.85	1260.22	908.731	1115.36	1065.38	1095.48	1030.67	696.448
Pld6	104.922	-0.980861	0.205381	-4.77582	1.78977e-06	2.76544e-05	194.715	99.4238	113.516	121.096	190.244	116.811	91.7469	74.3571	59.9223	78.2487	48.8006	70.1764
Map1lc3b	6477.35	0.205016	0.042958	4.77248	1.81974e-06	2.80901e-05	5805.94	6220.2	5865.76	5892.58	5976.36	6341.01	6824.22	7044.57	7225.93	6676.13	6612.48	7243.06
Psmd7	3252.48	0.238279	0.0499374	4.77155	1.82817e-06	2.81928e-05	2977.31	3074.68	2768.23	2943.94	2953.4	3186.17	3452.52	3603.77	3581.24	3290.79	3444.35	3753.38
Gpr83	136.865	-0.915598	0.191977	-4.76932	1.84844e-06	2.84503e-05	203.925	110.609	186.571	148.137	257.291	167.143	97.208	69.2641	90.7647	121.72	89.7931	99.9483
Adgrd1	28.2838	1.44941	0.303896	4.76943	1.84745e-06	2.84503e-05	2.63129	24.8559	13.4871	19.9868	12.5712	15.1949	50.2423	37.6878	34.3672	54.3394	40.0165	34.0249
Spg20	260.314	-0.477388	0.100147	-4.76687	1.87114e-06	2.87717e-05	293.389	354.819	267.494	280.991	276.567	340.935	232.644	234.276	201.797	227.138	201.059	212.656
Klf15	283.547	-0.53144	0.111507	-4.76599	1.87932e-06	2.88696e-05	324.964	320.02	342.797	367.992	373.784	282.055	230.459	243.443	215.015	253.221	272.307	176.504
Dock4	2070.3	-0.473284	0.0993725	-4.76273	1.90995e-06	2.93117e-05	1980.05	2768.33	2182.66	2445.44	2285.45	2775.91	1528.02	2030.05	1632.88	1581.28	1792.93	1840.54
Fut11	1184.68	0.272765	0.0572945	4.76075	1.92876e-06	2.95718e-05	1069.62	1083.72	1164.39	1001.69	1035.03	1084.53	1272.44	1224.35	1409.94	1338.92	1238.56	1292.95
Tmcc3	405.237	0.48414	0.101723	4.75939	1.94183e-06	2.97436e-05	356.54	333.07	355.16	283.342	363.727	334.287	510.069	384.008	469.685	504.269	415.781	552.905
Tspan33	284.074	-0.590791	0.124178	-4.75764	1.95874e-06	2.99737e-05	302.598	324.991	382.134	280.991	421.555	335.237	221.722	228.164	240.571	188.014	200.083	282.832
Vkorc1l1	3944.85	0.227732	0.0479043	4.7539	1.99533e-06	3.05042e-05	3468.04	3832.17	3610.05	3518.85	3772.2	3596.43	4273.87	4181.31	4534.71	4304.76	3923.57	4322.23
H2-D1	2144.44	-0.473229	0.0995711	-4.75267	2.0075e-06	3.06607e-05	2566.82	2025.14	2803.07	2463.08	2732.15	2370.4	1861.15	1766.24	1839.97	2055.11	1858.33	1391.83
Brd1	1885.38	0.292727	0.06161	4.75128	2.02134e-06	3.08261e-05	1668.24	1851.15	1655.54	1591.89	1626.72	1769.25	1956.17	2089.13	1935.14	2061.64	2096.47	2323.27
Lama1	167.431	-0.74044	0.155843	-4.75119	2.02221e-06	3.08261e-05	155.246	251.045	204.554	204.571	196.111	243.118	100.485	163.993	111.914	155.411	101.505	121.214
R3hcc1	1572.33	-0.221985	0.0467271	-4.75068	2.02738e-06	3.08752e-05	1661.66	1660.38	1711.74	1714.16	1648.51	1762.6	1433	1561.5	1425.8	1413.91	1383.99	1490.72
Kdm4a	3325.55	-0.321133	0.0676172	-4.74928	2.04141e-06	3.10592e-05	3423.31	4072.65	3568.46	3578.81	3747.06	3770.23	2602.77	3328.75	2949.41	2823.47	2924.13	3117.53
Kctd10	1076.64	0.399662	0.0841896	4.74717	2.06281e-06	3.13401e-05	898.586	989.267	946.344	892.352	902.614	939.232	1169.77	1264.07	1097.11	1046.58	1288.34	1485.4
Scn2b	3115.02	0.234563	0.049412	4.74707	2.06382e-06	3.13401e-05	2811.53	2990.17	2812.06	2754.65	2764.83	3038.02	3437.23	3418.39	3495.76	3131.03	3517.55	3208.98
Sec14l1	6669.34	0.300525	0.06335	4.74389	2.09657e-06	3.17906e-05	5245.48	6501.07	6120.89	5987.81	5757.62	6245.09	6617.79	7712.76	7351.94	7230.39	7895.94	7365.34
Pycr1	450.246	-0.394386	0.0831405	-4.7436	2.09949e-06	3.17906e-05	490.736	446.786	533.864	527.887	553.134	518.525	404.123	402.343	404.476	376.028	419.685	325.363
Scamp2	497.299	0.401897	0.0847214	4.74375	2.09797e-06	3.17906e-05	390.747	501.469	376.515	423.25	408.146	465.343	540.651	599.95	566.619	560.782	610.984	523.133
Micu1	2764.59	0.213028	0.0449155	4.74287	2.10709e-06	3.18753e-05	2644.45	2512.94	2549.06	2524.21	2668.45	2468.22	3062.6	2833.72	2958.22	2869.12	3174.97	2909.13
Lbhd1	185.364	0.54787	0.115524	4.74247	2.11131e-06	3.19087e-05	165.771	144.164	142.738	170.476	166.778	114.911	257.765	211.867	201.797	199.969	232.291	215.846
Tenm3	5485.72	-0.769825	0.162395	-4.74044	2.13255e-06	3.21684e-05	4894.2	9499.32	6169.22	5824.39	7034.02	8069.42	2915.15	5600.21	3779.51	4272.16	3667.85	4103.19
Ntng1	416.745	-0.822949	0.173602	-4.74044	2.13252e-06	3.21684e-05	457.845	644.39	474.296	600.78	523.801	493.833	217.353	355.488	345.435	326.036	389.429	172.251
Dcaf5	3117.37	-0.37132	0.0783388	-4.73992	2.13803e-06	3.22206e-05	3119.39	3975.09	3352.67	3389.53	3232.48	4024.74	2494.64	3035.4	2718.54	2702.84	2664.51	2698.6
Stx17	1274.33	-0.420473	0.0887854	-4.73584	2.18151e-06	3.28446e-05	1385.37	1572.14	1384.67	1471.97	1371.1	1565.07	1099.87	1232.49	1116.49	1017.23	855.963	1219.58
Trp53i11	650.353	0.567155	0.119769	4.73543	2.18595e-06	3.28803e-05	624.931	443.057	563.086	466.75	560.676	489.085	825.722	646.805	789.565	660.767	730.057	1003.74
Tsg101	2536.41	0.23284	0.0491949	4.73302	2.21209e-06	3.3242e-05	2290.54	2373.74	2147.82	2400.77	2386.02	2390.34	2840.88	2603.52	2774.93	2909.33	2717.22	2601.84
Klf12	696.922	-0.443371	0.0938106	-4.72624	2.28716e-06	3.43377e-05	665.716	942.662	832.828	784.188	774.387	815.774	535.19	695.697	561.331	557.522	636.36	561.411
Cntnap3	1645.9	-0.426279	0.0902548	-4.72306	2.32323e-06	3.48462e-05	2073.46	1670.32	2032.06	1785.88	2017.26	1746.46	1601.2	1239.62	1454.88	1486.72	1169.26	1473.71
Gng12	633.813	-0.398941	0.0844811	-4.72225	2.33252e-06	3.48911e-05	760.443	672.353	728.303	718.349	778.578	668.574	498.054	540.871	570.143	566.216	461.654	642.221
Bmerb1	8843.69	0.194078	0.0410988	4.72222	2.33281e-06	3.48911e-05	8163.58	8341.65	8214.76	7977.08	8556.81	8242.26	9047.99	9133.7	9990.29	9139.88	9386.31	9929.97
Gm4691	26.3201	-2.33846	0.495185	-4.72239	2.3309e-06	3.48911e-05	34.2068	21.749	34.8417	112.867	20.952	39.8865	8.7378	7.13013	21.1491	2.17357	6.83209	5.3164
Dtna	3377.89	0.418222	0.0885714	4.72186	2.33693e-06	3.49198e-05	2340.53	3454.98	2761.48	2929.83	2845.29	3011.43	3440.51	4253.63	3809.47	4016.76	4075.83	3594.95
Pptc7	1032.24	0.358408	0.0759791	4.71719	2.39125e-06	3.5698e-05	776.231	1011.02	924.99	952.312	842.272	915.49	1252.78	1112.3	1076.84	1270.45	1103.87	1148.34
Syt11	19613.4	-0.320089	0.0678813	-4.71542	2.41218e-06	3.59766e-05	21708.1	23560.3	20489.1	21013.2	21294.8	22613.8	15627.5	19820.7	18109.8	17416.8	15623	18083.2
Galnt7	234.744	-0.440559	0.0934346	-4.71516	2.41524e-06	3.59885e-05	265.76	274.658	236.024	276.288	275.729	291.551	186.77	203.718	194.748	223.878	169.826	217.972
Mrps17	2139.95	-0.221237	0.0469423	-4.71295	2.44151e-06	3.63458e-05	2302.38	2340.81	2301.8	2217.36	2422.06	2234.59	2009.69	2031.07	1987.13	2080.11	1925.67	1826.71
Cps1	180.184	0.518773	0.110146	4.70988	2.47862e-06	3.68637e-05	138.143	161.564	159.597	150.489	120.684	157.647	215.168	187.421	222.946	206.49	193.25	248.807
Nlgn3	1737.56	-0.555941	0.118094	-4.7076	2.50651e-06	3.72437e-05	2010.31	2218.39	1939.89	1909.33	2025.64	2304.87	1168.68	1547.24	1515.68	1321.53	1056.05	1833.09
Cachd1	765.943	-0.858405	0.182374	-4.70683	2.51599e-06	3.73496e-05	767.021	1259.57	805.854	1297.97	830.539	962.025	394.293	773.11	435.318	645.552	602.2	417.869
Elavl4	4793.43	0.386676	0.0821691	4.70586	2.52795e-06	3.7492e-05	4258.74	4369.67	3701.08	4426.49	4223.93	3946.87	5746.19	5079.71	4937.42	6491.38	4740.49	5599.23
Srek1ip1	378.265	-0.71123	0.151295	-4.70096	2.5894e-06	3.83675e-05	582.831	383.403	452.942	442.061	525.477	431.154	325.483	250.573	223.828	399.938	220.579	300.908
Adam19	1590.12	0.337952	0.0719001	4.70029	2.59789e-06	3.84575e-05	1252.49	1513.73	1433	1435.52	1358.53	1432.12	1494.16	1847.72	1893.72	1785.59	1729.49	1905.4
Tomm40l	674.934	-0.322553	0.0686436	-4.69895	2.61505e-06	3.86688e-05	732.814	686.645	778.88	787.715	719.074	799.63	611.646	603.005	626.541	565.129	649.048	539.083
Baiap2	2113.61	0.490232	0.104332	4.69879	2.61703e-06	3.86688e-05	1897.16	1771.61	1738.71	1524.87	1667.78	1946.84	2351.56	2362.11	2243.56	2204	2324.86	3330.19
Macroh2a1	2167.99	0.193287	0.0411697	4.69488	2.66763e-06	3.93798e-05	1982.68	2008.98	2075.89	2091.56	2011.4	1970.58	2346.1	2201.17	2399.54	2259.43	2381.47	2287.11
Pcdhb21	207.528	-0.580468	0.123695	-4.69274	2.69573e-06	3.97207e-05	264.445	219.354	234.9	216.328	295.843	261.162	150.727	176.216	157.737	153.237	143.474	216.909
Atp11c	902.391	-0.488268	0.104045	-4.69288	2.69388e-06	3.97207e-05	1168.29	1001.69	950.84	1134.54	1029.16	1037.05	822.445	740.515	648.571	854.215	575.847	865.509
Pnpla6	2503.36	0.267595	0.0570316	4.69205	2.70486e-06	3.98183e-05	2181.34	2255.68	2346.75	2204.43	2325.68	2315.32	2614.79	2783.81	2672.71	2533.3	2687.94	3118.6
Mrpl37	1646.96	-0.22527	0.0480233	-4.69085	2.72078e-06	4.00156e-05	1726.13	1782.79	1753.32	1760.01	1792.66	1837.63	1420.98	1537.05	1628.48	1475.86	1580.16	1468.39
Scara3	122.837	-0.860548	0.183469	-4.69043	2.72627e-06	4.00593e-05	151.299	164.049	148.358	124.624	172.645	189.936	58.9801	103.896	131.3	85.8562	64.4168	78.6827
Pdzd8	2538.93	-0.420192	0.089596	-4.68986	2.73399e-06	4.01355e-05	2590.51	3331.32	2632.23	2865.17	2880.49	3132.04	1995.49	2482.3	2077.89	2434.4	1848.57	2196.74
Sp1	904.499	0.251125	0.0535613	4.68855	2.75144e-06	4.03544e-05	780.178	861.258	855.306	865.311	792.825	799.63	1017.95	980.902	1019.56	944.418	946.732	989.913
Hmox1	359.783	-0.513471	0.10954	-4.68753	2.76517e-06	4.05183e-05	349.962	448.028	395.621	505.548	387.194	452.047	245.751	359.562	305.78	293.433	282.068	292.402
Adam11	2423.35	-0.377471	0.0805468	-4.68635	2.78114e-06	4.06774e-05	2637.87	2766.47	3015.49	2700.57	2525.14	2787.31	1818.55	2421.19	2032.95	2031.21	2401.97	1941.55
Pde11a	38.6073	-1.21725	0.259733	-4.68652	2.77884e-06	4.06774e-05	71.0448	60.8971	38.2134	35.2708	70.3988	47.4839	20.7523	25.4648	22.9115	30.43	11.7121	28.7085
Dusp18	1468.99	0.415708	0.0887101	4.68614	2.78402e-06	4.0682e-05	1134.09	1388.2	1203.72	1294.44	1220.25	1308.66	1618.68	1605.3	1771.23	1545.41	1459.14	2078.71
Col4a4	12.4064	-1.67462	0.357442	-4.68502	2.79936e-06	4.08685e-05	18.419	19.8848	19.1067	19.9868	15.0855	20.8929	9.83002	5.09295	6.16848	2.17357	5.85607	6.37968
Zfp804a	2466.55	-0.820536	0.175232	-4.68256	2.83314e-06	4.13237e-05	2427.37	4207.49	2455.77	3694.03	2818.47	3293.49	1463.58	2372.3	1627.6	2169.23	1942.26	1127.08
Slc7a11	225.013	-0.949387	0.202764	-4.68221	2.83793e-06	4.13557e-05	205.241	421.308	237.148	407.966	226.282	280.155	113.591	183.346	144.519	180.407	186.418	113.771
Ap1m2	50.3028	1.11347	0.237947	4.67949	2.87586e-06	4.187e-05	22.366	31.6913	28.0981	45.8521	36.8756	25.6413	83.0091	52.9667	69.6156	80.4222	88.8171	38.2781
Hspa2	412.641	-0.521746	0.111553	-4.67713	2.90924e-06	4.23172e-05	414.428	533.781	448.446	463.223	458.431	597.348	326.575	404.38	314.592	344.511	279.139	366.831
Deaf1	4446.43	0.341264	0.0729824	4.67598	2.9256e-06	4.25162e-05	4196.91	3746.41	3973.07	3598.8	4056.31	3967.76	5185.88	4453.28	5021.14	4401.49	4982.54	5773.61
Frmd5	2191.64	-0.3833	0.0820123	-4.67369	2.95834e-06	4.29527e-05	2231.33	2736.64	2387.22	2563.01	2406.13	2560.33	1745.37	2109.5	1982.72	1979.04	2042.79	1555.58
Macrod2	2473.95	-0.346635	0.0742274	-4.66991	3.01337e-06	4.37117e-05	2994.41	2603.04	2845.78	2739.37	2917.36	2520.45	2249.98	2058.57	2277.05	2157.27	1858.33	2465.74
Irs2	1394.12	-0.629619	0.134836	-4.66951	3.01915e-06	4.37157e-05	1285.39	2123.94	1475.71	1752.96	1628.39	1892.71	789.678	1370	1021.32	1106.35	1176.09	1106.87
Grem2	1215.13	-0.427906	0.0916358	-4.66964	3.01726e-06	4.37157e-05	1363.01	1593.89	1235.19	1450.81	1317.46	1401.73	967.711	1182.58	1011.63	1167.21	1048.24	842.117
Npc2	2460.82	0.220919	0.0473165	4.66898	3.02705e-06	4.37902e-05	2178.71	2241.38	2331.02	2270.26	2286.29	2329.56	2775.34	2566.85	2853.36	2582.21	2622.54	2492.33
Grsf1	2843.02	-0.295592	0.0633162	-4.6685	3.03403e-06	4.38512e-05	2932.57	3302.11	3076.18	3030.94	3237.51	3216.56	2399.62	2775.66	2737.92	2600.68	2231.16	2575.26
Tspan14	2188.58	0.364566	0.0781111	4.66727	3.05228e-06	4.40749e-05	1814.27	1836.23	2187.16	1764.72	2083.47	1795.84	2274.01	2282.66	2767	2339.85	2423.44	2694.35
Zfp512b	5211.56	0.27283	0.0585016	4.66364	3.10669e-06	4.48198e-05	4619.23	5088.63	4741.84	4585.21	4664.76	4618.29	5322.41	5702.07	5482.89	5352.43	6477.79	5883.12
Ficd	325.039	-0.441472	0.0947055	-4.66153	3.1387e-06	4.52406e-05	331.543	369.111	393.374	409.141	330.204	412.161	257.765	295.391	242.333	317.342	263.523	278.579
Calu	6230.99	-0.352173	0.0756125	-4.6576	3.19919e-06	4.60707e-05	6841.35	6645.24	7317.87	7609.09	7201.63	6313.47	5679.57	5272.22	5801.89	6099.05	5447.12	4543.39
Igf2bp2	203.574	-0.661985	0.142142	-4.6572	3.20541e-06	4.61184e-05	203.925	245.452	259.627	253.95	303.385	229.822	113.591	189.458	163.905	197.795	152.258	129.72
Map3k12	4161.26	-0.174625	0.037523	-4.65381	3.25864e-06	4.68263e-05	4223.22	4414.42	4660.91	4340.66	4432.61	4404.61	3795.48	3977.59	4013.91	3909.17	3952.85	3809.73
Acap3	7101.64	0.338145	0.0726617	4.65369	3.2605e-06	4.68263e-05	5570.44	6923	6394.01	6315.83	6059.33	6372.35	6853.71	8686.54	7744.08	7499.92	8673.82	8126.64
Psmb9	18.4621	-1.95433	0.420331	-4.64951	3.32729e-06	4.77422e-05	46.0476	9.94238	31.4699	23.5139	33.5233	32.2891	3.27667	4.07436	10.5745	10.8679	11.7121	4.25312
Efemp2	202.788	-0.503494	0.108327	-4.6479	3.35337e-06	4.80731e-05	221.028	236.131	255.131	249.247	225.444	240.269	140.897	206.774	170.074	190.188	148.354	149.922
Msln	78.2616	0.811648	0.174733	4.64507	3.39963e-06	4.86923e-05	56.5727	49.7119	64.0637	61.1361	35.1994	75.9743	93.9313	87.5988	98.6956	88.0298	111.265	116.961
Gpr180	632.048	-0.38906	0.0837755	-4.64407	3.41605e-06	4.88833e-05	724.92	621.399	775.508	786.539	757.626	638.184	610.553	497.072	564.856	511.877	561.207	534.829
Sox12	3517.36	0.312111	0.0672264	4.64269	3.43909e-06	4.91688e-05	2998.36	2988.31	3275.12	3461.24	3181.36	2928.81	3540.99	3891.01	3727.52	3935.26	4475.99	3804.41
Atp5g1	4847.22	-0.365438	0.0787244	-4.64199	3.45074e-06	4.9291e-05	5461.24	5309.85	5497.11	6226.47	5388.03	4867.1	4419.14	4410.5	4302.95	4371.06	4492.58	3420.57
Tdrd7	815.856	-0.358177	0.0771641	-4.64176	3.45452e-06	4.93006e-05	793.334	974.353	911.503	1000.52	891.719	926.887	707.761	774.129	771.941	725.974	700.777	611.386
Mib1	4047.29	-0.556915	0.120078	-4.63795	3.51881e-06	5.01731e-05	4248.22	5964.81	4110.19	4621.65	4378.14	5586.96	2938.08	3872.68	2912.4	3238.63	2743.57	3952.21
Msl1	5370.36	-0.25926	0.0559032	-4.63767	3.52366e-06	5.01972e-05	5536.23	6149.36	5753.37	6090.09	5681.35	5897.51	4450.81	5340.47	5108.38	4966.62	4560.91	4909.16
Avil	44.9475	-1.05574	0.227671	-4.63714	3.53266e-06	5.02802e-05	48.6789	70.218	51.7005	82.2986	55.3134	56.0311	26.2134	31.5763	29.08	30.43	42.9445	14.8859
Cfap100	40.452	-0.937493	0.202196	-4.63656	3.54248e-06	5.03748e-05	47.3632	43.4979	62.9398	65.8389	51.961	48.4336	18.5678	25.4648	31.7236	29.3433	27.3283	32.9617
Nudt16	385.323	0.409436	0.088313	4.63619	3.54897e-06	5.0377e-05	336.805	326.234	293.344	331.546	402.279	294.4	476.21	422.715	455.586	424.934	444.086	415.742
Kcmf1	2602.9	-0.352745	0.0760835	-4.6363	3.54709e-06	5.0377e-05	2697.07	2958.48	2936.81	3127.35	2784.94	3012.38	2255.44	2438.5	2281.45	2496.35	2410.75	1835.22
Hacd3	6224.41	0.277871	0.0599411	4.63573	3.55679e-06	5.04429e-05	5720.43	5989.66	5140.83	5451.69	5635.26	5818.68	7139.87	6777.7	6943.94	6401.18	6184.99	7488.68
Pdrg1	2382.76	-0.261475	0.0565046	-4.62751	3.70096e-06	5.24408e-05	2793.11	2461.98	2589.52	2539.5	2734.66	2473.91	2323.16	2125.8	2322.87	2046.42	2054.51	2127.62
Pdap1	3627.97	-0.233372	0.0504359	-4.6271	3.70818e-06	5.24962e-05	4006.14	3710.99	3812.35	4303.04	3834.22	3864.24	3296.33	3433.67	3262.24	3220.15	3567.32	3224.93
Capzb	7262.91	0.229822	0.0496769	4.62634	3.72183e-06	5.26425e-05	7011.07	6425.26	6604.18	6411.06	6962.78	6701.88	8382.82	7276.81	7911.51	7390.15	8162.39	7915.05
Adcy9	699.507	-0.659437	0.142575	-4.62519	3.74248e-06	5.28875e-05	627.563	1081.23	823.837	873.541	771.873	960.125	425.968	717.087	530.489	486.881	614.888	480.602
Capn5	2657.34	-0.598426	0.129404	-4.62448	3.75546e-06	5.30238e-05	2982.57	3239.97	3510.02	2782.87	3374.12	3314.38	1625.23	2495.55	2396.89	1872.53	1600.66	2693.29
Tfeb	31.9213	-1.54025	0.333097	-4.62404	3.76345e-06	5.30893e-05	38.1537	48.4691	56.1962	42.325	63.6942	36.0878	3.27667	32.5949	14.0994	21.7357	13.6642	12.7594
Fah	101.256	-0.623519	0.1349	-4.62209	3.79898e-06	5.35431e-05	94.7265	122.416	130.375	144.61	124.874	119.66	72.0868	93.7103	87.2399	76.0751	66.3688	82.9358
Gtf2h3	677.972	0.25784	0.0558018	4.62065	3.82544e-06	5.38682e-05	617.038	597.785	609.167	650.159	621.856	611.593	755.819	677.362	756.96	764.011	734.937	738.979
Prpsap1	975.984	-0.380355	0.0823719	-4.61753	3.88337e-06	5.46355e-05	1095.93	1157.04	1109.31	1087.52	1165.77	1007.61	758.004	937.103	942.896	938.984	776.906	734.726
Dag1	4215.7	-0.487067	0.105487	-4.61732	3.88736e-06	5.46432e-05	4644.23	5501.86	4691.26	4392.39	5050.28	5241.28	3052.77	4067.23	3471.97	3139.73	2927.06	4408.36
Kcne1l	84.6746	1.30061	0.281797	4.6154	3.92342e-06	5.51013e-05	69.7292	37.9053	64.0637	30.568	50.2849	41.7859	171.479	75.3757	111.914	96.724	66.3688	199.897
Tmem134	655.035	0.314153	0.0680716	4.61504	3.93029e-06	5.5149e-05	551.255	544.967	600.176	626.645	583.305	599.247	825.722	671.251	726.118	714.019	721.273	696.448
Nubp2	858.88	0.270455	0.0586216	4.61358	3.95795e-06	5.54882e-05	847.275	799.74	782.251	790.066	711.531	745.498	944.774	914.694	979.906	880.298	965.276	945.255
Cntfr	2204.98	0.345859	0.0749692	4.61335	3.96233e-06	5.55006e-05	2145.82	1694.55	1967.99	1852.89	1923.4	2071.25	2388.69	2459.9	2147.51	2440.92	2706.48	2660.32
Frem2	310.421	-1.02463	0.22211	-4.61316	3.96595e-06	5.55024e-05	294.705	542.481	342.797	378.573	397.251	540.367	124.514	326.967	179.767	186.927	139.57	271.136
Crim1	1985.48	-0.660616	0.143237	-4.61205	3.98725e-06	5.57513e-05	2082.67	3077.17	2048.91	2505.4	2148	2729.38	1169.77	2142.1	1302.43	1701.91	1458.16	1459.88
Tmem59l	5825.3	-0.25161	0.0545783	-4.61007	4.02528e-06	5.62335e-05	6458.5	6119.53	6304.09	6585.06	6315.78	6212.8	5233.94	5649.1	5215.01	5313.3	5793.61	4702.88
Itpripl2	49.5753	-0.90617	0.196592	-4.6094	4.03838e-06	5.63669e-05	44.7319	78.9176	60.6919	54.0819	70.3988	77.8737	27.3056	40.7436	42.2981	32.6036	31.2324	34.0249
Rad51d	389.926	-0.378361	0.0821154	-4.60767	4.07208e-06	5.67874e-05	447.319	400.802	452.942	489.089	434.964	423.557	337.497	368.73	357.772	339.078	344.532	282.832
Atxn3	1122.95	0.323948	0.0703301	4.6061	4.10289e-06	5.7167e-05	990.681	984.917	1130.67	968.772	951.222	959.176	1347.8	1211.1	1272.47	1354.14	1090.21	1214.26
Traf3	2372.49	0.299758	0.0650868	4.6055	4.11467e-06	5.72808e-05	1957.68	2324.65	2155.69	1955.18	2158.9	2202.31	2377.77	2674.82	2565.2	2577.86	2588.38	2931.46
P2rx3	208.209	-0.68625	0.149046	-4.6043	4.13864e-06	5.7564e-05	214.45	287.086	264.122	279.815	249.748	245.017	156.188	209.83	163.024	179.32	154.21	95.6951
Rabgap1l	9544.78	0.4556	0.0990336	4.60046	4.21549e-06	5.85305e-05	7257.1	9634.79	6780.64	8200.46	7854.5	8567.05	10289.8	12149.7	9631.63	12707.8	9686.92	11776.9
Tgoln1	4110.98	-0.232154	0.0504613	-4.60064	4.21197e-06	5.85305e-05	4358.73	4763.64	4209.1	4599.31	4416.69	4293.5	3795.48	3888.98	3657.02	4081.97	3712.75	3554.54
Pitpnm3	1371.49	-0.304741	0.0662715	-4.59837	4.25803e-06	5.90694e-05	1472.21	1594.51	1584.73	1429.64	1561.35	1450.16	1078.03	1356.76	1158.79	1203.07	1310.78	1257.86
Myo5a	20686.9	-0.516754	0.112481	-4.59416	4.34499e-06	6.01721e-05	20212.3	30326.1	21842.3	24442.7	22803.4	26485.6	14313.6	21344.6	16246	17086.5	15147.7	17991.7
Hadhb	968.57	0.515348	0.112175	4.59415	4.34509e-06	6.01721e-05	907.795	707.152	924.99	711.295	840.596	695.165	1357.63	929.973	1171.13	1211.77	1207.33	958.015
Hsp90b1	12145.9	-0.338746	0.0737713	-4.59183	4.39367e-06	6.07919e-05	12717	13621.1	13753.5	15454.5	13752.9	12094.2	10349.9	10660.6	11321.8	11516.7	11323.7	9184.61
Garin1a	20.4577	-1.23467	0.268906	-4.59147	4.4014e-06	6.08458e-05	27.6285	27.9629	33.7177	25.8653	28.4948	28.4904	12.0145	15.2789	12.337	17.3886	7.8081	8.50623
Cdh4	2434.17	0.700813	0.152783	4.58699	4.49682e-06	6.21109e-05	2144.5	1620.61	1807.27	1542.51	2149.68	1861.37	3423.03	2493.51	2548.46	2698.49	2357.07	4563.59
Adra1b	369.602	-0.498672	0.108792	-4.5837	4.56815e-06	6.30413e-05	482.842	423.172	390.002	477.332	346.128	478.638	358.25	312.707	259.076	307.561	323.06	276.453
Nacc2	1127.64	-0.373574	0.0816016	-4.57802	4.69393e-06	6.47208e-05	1420.9	1348.43	1170.01	1236.83	1166.61	1294.41	941.497	1100.08	936.727	868.343	928.188	1119.63
Slc4a3	5632.09	-0.397939	0.0869683	-4.57568	4.74666e-06	6.53911e-05	6016.45	6891.31	6395.13	6532.16	5911.83	6676.24	4129.7	5715.31	4510.04	4439.53	5632.57	4734.78
Rab26os	157.104	0.767236	0.167705	4.5749	4.76441e-06	6.55787e-05	163.14	83.8888	113.516	125.799	112.303	102.565	261.042	142.603	185.935	192.361	188.37	213.719
Marchf3	97.7162	0.651131	0.142403	4.57244	4.82078e-06	6.62972e-05	88.1482	66.4896	62.9398	96.4069	70.3988	74.075	125.606	106.952	113.676	124.981	101.505	141.416
Mtmr2	1910.21	-0.306376	0.0670535	-4.56913	4.89752e-06	6.72675e-05	1982.68	2381.82	2007.33	2026.9	2013.91	2255.49	1616.49	1912.91	1662.84	1694.3	1636.77	1731.02
Sephs2	1063.56	-0.267467	0.0585391	-4.56903	4.8998e-06	6.72675e-05	1215.66	1148.34	1101.45	1140.42	1125.54	1241.23	961.158	969.698	1033.66	988.976	864.747	971.837
Hapln4	56.5602	-0.867345	0.18985	-4.56858	4.91041e-06	6.73549e-05	60.5197	79.539	67.4355	79.9472	75.4273	75.0246	30.5823	64.1712	39.6545	39.1243	32.2084	35.0882
Trhde	473.512	-0.509353	0.111498	-4.56828	4.91733e-06	6.73916e-05	522.311	633.827	493.403	512.603	618.504	553.663	339.682	482.812	370.99	460.798	341.604	351.945
Fnbp1l	17008	-0.191855	0.0420254	-4.56521	4.98983e-06	6.83263e-05	18009.9	18451.2	17803	18879.3	18208.2	17469.3	15616.6	15796.3	15749	16797.4	14772.9	16542.5
Mmgt2	161.3	-0.653702	0.143373	-4.55944	5.12905e-06	7.01721e-05	214.45	162.806	195.563	151.665	260.643	198.483	110.315	117.138	138.35	149.977	117.121	119.087
Acta1	74.9189	-0.768795	0.168687	-4.55751	5.17633e-06	7.0758e-05	84.2013	98.8024	95.5336	94.0555	93.027	100.666	40.4123	76.3943	45.823	52.1658	72.2249	45.721
Smarcd2	304.001	0.49483	0.108633	4.55507	5.23686e-06	7.15239e-05	248.657	224.946	258.503	216.328	301.709	264.011	323.298	289.28	381.564	354.293	396.261	389.16
Zfp961	368.026	0.635455	0.139511	4.55486	5.24198e-06	7.15323e-05	297.336	223.703	336.053	284.518	350.318	239.319	524.268	323.912	440.605	502.096	488.006	406.173
Gnpat	1801.37	-0.290675	0.0638296	-4.55391	5.26576e-06	7.17952e-05	1935.31	2038.81	1974.74	1763.54	2077.6	2101.64	1470.13	1729.57	1719.24	1521.5	1689.48	1594.92
Asap3	55.9224	-1.00677	0.221099	-4.55349	5.27637e-06	7.18782e-05	76.3074	52.8189	101.153	63.4875	90.5128	64.5782	37.1356	42.7808	47.5854	39.1243	20.4963	35.0882
Top1mt	461.183	-0.307307	0.0674922	-4.55322	5.28305e-06	7.19074e-05	493.367	521.353	493.403	537.292	498.658	516.625	415.045	441.05	407.119	385.809	447.014	377.464
Fbxo38	1444.14	-0.246613	0.0541742	-4.55222	5.30819e-06	7.21877e-05	1411.69	1684.61	1569	1548.39	1609.12	1574.57	1244.04	1377.13	1357.95	1336.75	1323.47	1292.95
Map3k2	1989.91	-0.430874	0.0946697	-4.55133	5.33066e-06	7.24313e-05	2144.5	2683.2	2109.61	2244.4	2150.52	2373.25	1496.35	1945.51	1600.28	1813.85	1415.22	1902.21
Tmem218	377.5	-0.494857	0.10877	-4.54958	5.37529e-06	7.29754e-05	419.691	410.744	431.587	429.128	512.068	447.299	323.298	306.596	373.633	309.734	338.676	227.542
Nek9	1740.93	0.325584	0.0715681	4.54929	5.38279e-06	7.30147e-05	1416.95	1708.22	1456.61	1638.92	1402.95	1644.84	1855.69	1998.47	1943.95	1736.69	1979.35	2108.48
Npl	80.1374	-0.853078	0.187756	-4.54354	5.53177e-06	7.49715e-05	142.09	75.8106	114.64	105.812	93.8651	89.2698	64.4412	48.8923	66.0908	36.9508	66.3688	57.4171
Cygb	1047.34	-0.433101	0.0953557	-4.54195	5.57354e-06	7.54732e-05	1426.16	1095.53	1252.05	1002.87	1307.41	1136.77	977.541	820.984	821.288	957.459	800.33	969.711
Pmepa1	721.104	-0.660275	0.145397	-4.5412	5.59353e-06	7.56795e-05	742.024	1037.74	742.914	885.297	788.635	1101.63	421.599	743.571	559.569	528.179	457.75	644.347
Nek4	510.284	-0.389778	0.0858388	-4.54081	5.60372e-06	7.57527e-05	561.78	577.901	543.979	634.875	564.029	591.65	391.016	483.83	473.21	367.334	437.253	496.551
Il13ra1	115.883	-0.676139	0.148921	-4.54025	5.61884e-06	7.58926e-05	167.087	118.066	148.358	145.786	157.559	119.66	80.8246	91.6731	87.2399	122.807	77.105	74.4296
Ccdc90b	510.402	0.697645	0.153731	4.5381	5.6764e-06	7.66049e-05	459.16	279.008	425.967	373.871	471.84	328.589	826.814	442.068	616.848	625.989	691.993	582.677
Fhip2a	1398.02	-0.470033	0.103599	-4.53703	5.7051e-06	7.69268e-05	1332.75	1943.11	1575.74	1601.3	1478.38	1808.19	995.016	1388.34	1221.36	1196.55	1053.12	1182.37
Mpdu1	1815.35	0.182095	0.0401559	4.5347	5.76862e-06	7.77173e-05	1687.97	1708.85	1674.65	1716.51	1710.52	1706.57	2018.43	1916.99	1984.49	1837.76	1902.25	1919.22
Rnf38	2868.03	0.289488	0.0638749	4.5321	5.83994e-06	7.86115e-05	2458.94	2870.24	2349	2515.98	2542.74	2742.67	2992.69	3244.21	2993.47	3416.86	2993.43	3296.17
Rab11a	8069.45	0.417128	0.0921099	4.52859	5.93787e-06	7.97946e-05	7647.85	6689.36	6362.54	7158.8	6649.34	6958.3	10774.8	8039.73	7921.2	10588.6	8179.96	9862.98
B4galt7	1119.09	-0.243689	0.0538108	-4.52862	5.937e-06	7.97946e-05	1255.13	1125.35	1208.22	1262.7	1255.45	1176.65	1102.05	1010.44	997.531	1041.14	977.964	1016.5
Cyb561a3	418.17	0.421579	0.0931284	4.52686	5.9867e-06	8.03827e-05	339.436	344.876	425.967	367.992	359.537	309.595	460.919	464.477	500.528	418.413	556.327	469.969
Micu2	1822.48	0.23007	0.0508342	4.5259	6.01402e-06	8.06813e-05	1724.81	1573.38	1689.26	1681.24	1770.87	1628.7	2120.01	1888.47	2017.97	1954.04	1871.99	1948.99
Kcnh7	2856.21	-0.710674	0.157033	-4.52562	6.02183e-06	8.07179e-05	2590.51	4857.47	3007.62	3634.07	2900.6	4282.1	1804.35	2972.25	1928.97	2278.99	2028.15	1989.4
Pdgfb	589.302	-0.579425	0.12805	-4.52499	6.03976e-06	8.08219e-05	531.521	736.357	692.337	767.728	797.853	709.41	374.633	647.823	475.854	441.236	446.038	450.83
Jrk	449.133	0.3739	0.0826288	4.52506	6.03796e-06	8.08219e-05	389.431	385.889	374.267	392.682	372.108	433.054	516.622	515.407	480.26	430.368	510.454	589.057
Pdzd4	6590.47	0.212872	0.04707	4.52245	6.11293e-06	8.17321e-05	6255.89	5937.46	6127.64	5800.87	6116.32	6395.14	6885.38	6916.23	7342.25	6582.67	7130.75	7595
Susd4	2463.94	0.162898	0.0360243	4.52188	6.12919e-06	8.18807e-05	2328.69	2381.82	2311.91	2242.05	2288.8	2392.24	2554.71	2597.4	2596.05	2670.24	2607.9	2595.46
Man2b2	245.251	-0.576222	0.127498	-4.51947	6.19953e-06	8.27507e-05	236.816	285.222	303.46	335.073	269.024	331.438	191.139	224.09	178.005	154.324	183.49	250.934
Polr2b	3696.06	0.200666	0.0444021	4.51929	6.20487e-06	8.27524e-05	3423.31	3468.65	3353.79	3316.63	3753.77	3316.28	3965.87	3856.38	4134.64	3966.77	3880.62	3916.06
Coq5	1197.44	-0.332379	0.0735641	-4.51822	6.23611e-06	8.30993e-05	1309.07	1467.74	1290.27	1282.68	1230.3	1427.37	980.818	1129.62	1105.92	912.901	1121.44	1111.13
Ap1ar	3095.01	0.181687	0.040214	4.51802	6.24207e-06	8.3109e-05	2948.36	2829.23	2861.51	2994.49	2867.08	2906.02	3393.54	3121.98	3395.31	3333.18	3148.62	3340.82
Mcm9	223.145	0.470685	0.104191	4.5175	6.25742e-06	8.32436e-05	167.087	195.741	189.943	222.206	193.597	152.898	257.765	239.369	244.095	255.395	257.667	301.971
4930563E22Rik	119.498	0.577798	0.127939	4.5162	6.29598e-06	8.36865e-05	109.199	90.1028	100.029	89.3527	103.084	84.5214	181.309	125.287	142.756	123.894	136.642	147.796
Ccdc97	1201.1	-0.337644	0.0747783	-4.51527	6.32356e-06	8.39828e-05	1232.76	1411.82	1290.27	1372.03	1233.66	1503.34	951.327	1199.9	1007.22	1033.53	1061.9	1115.38
Scrn1	15941.9	0.271146	0.060054	4.51503	6.33065e-06	8.40068e-05	14069.5	15474.7	14326.7	13160.7	14850	14801.7	16780.9	17572.7	17905.3	16446.3	16283.8	19630.3
Myadm	1593.16	0.487342	0.107945	4.51471	6.34022e-06	8.40635e-05	1086.72	1624.34	1148.65	1328.53	1265.5	1500.49	1537.85	2115.61	1761.54	2013.82	1931.53	1803.32
Vash1	2482.04	0.393896	0.0872621	4.51394	6.36344e-06	8.4301e-05	1993.2	2185.46	2408.57	2104.49	2075.09	2104.49	2526.32	3015.03	2626.89	2385.5	2997.33	3362.09
Nipal3	2086.54	-0.295035	0.065378	-4.51275	6.39912e-06	8.4703e-05	2386.58	2157.5	2434.42	2116.25	2472.34	2229.85	1707.15	1794.76	2011.8	2014.9	1772.44	1940.48
Pin1	2733.57	-0.328108	0.0727298	-4.51134	6.44209e-06	8.51706e-05	3375.95	2708.68	3140.24	3295.47	2952.56	2791.11	2708.72	2329.52	2319.35	2361.59	2559.1	2260.53
Pnpla8	4652.38	-0.307396	0.0681401	-4.51123	6.44517e-06	8.51706e-05	5121.81	5211.05	5156.57	5185.99	5232.98	4966.82	4321.93	4205.76	4054.45	4900.32	3825.97	3644.92
Tcf3	684.469	-0.480468	0.106545	-4.50955	6.49647e-06	8.57771e-05	936.739	664.896	882.281	775.958	835.567	692.316	598.539	544.946	520.796	536.873	703.705	521.007
Vps54	1429.69	0.293804	0.0651548	4.50932	6.50368e-06	8.5801e-05	1228.81	1368.94	1217.21	1263.87	1360.21	1262.12	1605.57	1576.78	1511.28	1800.81	1432.79	1527.93
Strn3	2833.88	-0.276123	0.0612425	-4.50868	6.52322e-06	8.59161e-05	3039.14	3233.14	2972.78	3035.64	3200.63	3138.69	2610.42	2674.82	2354.6	2919.11	2374.64	2452.99
Actr3	8772.02	0.181122	0.0401713	4.50873	6.52167e-06	8.59161e-05	8238.57	8248.44	8031.56	8321.56	8058.99	8431.25	9972.01	8901.46	9127.58	9661.54	8979.31	9292
Hsdl2	460.812	-0.393311	0.0872524	-4.50775	6.55202e-06	8.6224e-05	586.778	479.72	527.121	523.184	521.287	503.33	482.763	363.637	395.664	417.326	362.101	366.831
Anp32e	4161.4	0.369614	0.0820477	4.50488	6.6412e-06	8.73252e-05	3385.16	4000.56	3370.65	3453.01	3385.01	4188.08	4516.35	5166.29	4433.37	4534.08	4202.71	5301.51
Ankrd13d	2148.54	-0.211425	0.0469409	-4.50407	6.66644e-06	8.75122e-05	2443.15	2217.77	2362.49	2189.14	2306.4	2319.12	1994.4	2014.77	1955.41	1867.1	2010.59	2102.1
Stx6	1963.61	0.252902	0.0561488	4.50415	6.66398e-06	8.75122e-05	1866.9	1809.51	1762.31	1711.81	1729.8	1871.82	2065.4	2144.13	2155.44	1974.69	2076.95	2394.51
Zfp212	572.559	0.336284	0.0746716	4.50351	6.68415e-06	8.76722e-05	467.054	481.584	532.74	458.521	544.753	550.814	563.588	633.563	666.195	641.204	648.072	682.625
Gria1	14083.6	-0.517618	0.114958	-4.50268	6.71033e-06	8.7943e-05	15949.6	18136.8	15226.9	15489.8	15119	19576.7	10915.7	13472.9	11572.1	9564.81	9367.77	14611.6
Cmtm3	96.1466	-0.74897	0.166409	-4.50078	6.77048e-06	8.86306e-05	134.196	119.309	133.747	126.975	129.065	80.7227	66.6257	73.3385	78.4278	95.6373	61.4888	54.2272
Gspt2	1007.76	0.223024	0.0495534	4.50067	6.77396e-06	8.86306e-05	966.999	924.641	900.263	938.204	959.603	891.748	1127.18	1037.94	1104.16	1043.32	1079.47	1119.63
H2-M3	51.8613	-1.06659	0.237013	-4.50015	6.79065e-06	8.87759e-05	60.5197	65.8683	85.4183	83.4743	80.4558	45.5846	29.4901	33.6135	33.486	53.2526	34.1604	17.0125
Arl8a	11231.8	0.156754	0.0348629	4.49629	6.91496e-06	9.03266e-05	10876.4	10634.6	10222.1	10834	10758.5	10409.4	11613.6	11407.2	11943	11688.4	11997.1	12396.8
Ap1s1	5733.84	-0.320125	0.0712175	-4.49504	6.9558e-06	9.06778e-05	6971.6	5403.68	6660.38	6467.49	6618.33	6088.39	5699.23	4844.41	5193.86	5007.91	5155.3	4695.44
Slc16a11	96.4188	-0.732719	0.16301	-4.49494	6.95897e-06	9.06778e-05	143.405	93.2098	127.003	132.853	107.274	119.66	84.1013	75.3757	60.8035	85.8562	48.8006	78.6827
Il1rapl1	715.098	-0.462014	0.102781	-4.49513	6.95271e-06	9.06778e-05	828.856	960.682	742.914	822.986	698.122	915.49	586.525	661.065	539.301	706.412	508.502	610.322
Pik3ca	3340.52	-0.378169	0.0842074	-4.49092	7.09159e-06	9.23301e-05	3448.31	4129.19	3762.9	3769.27	3829.19	3713.24	2668.3	3240.14	2993.47	3419.03	2486.88	2626.3
Cd164l2	105.704	-0.858241	0.191193	-4.48887	7.16017e-06	9.31467e-05	119.724	137.95	144.986	126.975	133.255	154.798	63.349	101.859	81.9526	83.6826	85.8891	34.0249
Thrb	1438.58	-0.492162	0.109748	-4.48448	7.30911e-06	9.50065e-05	1564.3	1893.4	1655.54	1554.27	1593.19	1827.18	995.016	1455.57	1178.18	1019.41	1063.85	1463.07
Pde7a	1574.31	-0.322092	0.0718547	-4.48255	7.3758e-06	9.57949e-05	1632.72	1856.74	1772.43	1783.53	1736.5	1711.32	1317.22	1435.19	1401.13	1667.13	1327.38	1250.42
Arhgef40	547.141	-0.418736	0.0934341	-4.48162	7.40771e-06	9.61308e-05	653.876	523.218	675.479	543.171	704.826	656.228	506.792	451.235	472.329	473.839	406.021	498.678
Tmem68	2641.82	0.556016	0.124081	4.48109	7.42644e-06	9.62952e-05	2526.04	1808.89	2180.41	2359.62	2112.8	1849.02	4075.09	2367.2	2932.67	3561.4	2891.92	3036.73
Cul7	2737.43	-0.240384	0.0536617	-4.47962	7.47752e-06	9.68784e-05	2957.57	2960.96	3023.36	2846.35	2925.74	3075.06	2332.99	2788.9	2426.85	2647.41	2467.36	2396.63
Rpl22l1	1139.92	-0.541955	0.121	-4.47895	7.5011e-06	9.70695e-05	1523.52	1160.15	1374.56	1528.4	1477.54	1047.5	1156.67	856.634	1053.93	896.599	818.874	784.7
S1pr5	45.7474	-0.993865	0.221902	-4.47885	7.50449e-06	9.70695e-05	38.1537	50.9547	65.1876	82.2986	70.3988	58.8801	17.4756	36.6692	34.3672	32.6036	32.2084	29.7718
Mrps36	514.334	-0.351297	0.0785252	-4.47369	7.68804e-06	9.93628e-05	598.619	547.452	527.121	651.334	598.39	539.418	487.132	472.626	448.536	408.632	480.198	412.552
Ddx59	279.649	0.343757	0.0768491	4.47314	7.70776e-06	9.94558e-05	231.554	251.666	237.148	265.707	237.177	254.514	295.993	327.986	298.73	334.73	313.3	307.288
Cebpg	1295.2	-0.336603	0.0752496	-4.47315	7.70758e-06	9.94558e-05	1310.38	1516.83	1407.15	1651.85	1419.71	1366.59	1076.93	1209.07	1178.18	1286.76	1060.93	1057.96
Ufm1	3312.42	0.272633	0.0609806	4.47082	7.7921e-06	0.000100462	3114.13	2964.07	2790.7	3114.41	3079.11	2939.26	3936.38	3374.59	3575.07	3904.83	3241.34	3715.1
Cdc27	2597.59	-0.358406	0.0801884	-4.46955	7.83828e-06	0.000100976	2853.63	3270.42	2740.13	2972.15	2727.95	2943.05	2268.55	2381.46	2050.58	2603.94	1929.58	2429.59
Rbm8a	1851.11	0.188774	0.0422401	4.46907	7.85618e-06	0.000101124	1784.01	1751.72	1660.04	1700.05	1674.49	1811.04	2015.15	1951.62	1991.54	1893.18	1991.06	1989.4
Akna	86.1398	-0.918655	0.205603	-4.46811	7.8915e-06	0.000101497	71.0448	132.979	110.145	136.38	132.417	92.1189	38.2279	67.227	57.2787	83.6826	65.3928	46.7843
Megf11	1170.25	0.414201	0.092777	4.46448	8.02641e-06	0.000103149	1110.4	1044.57	891.272	1058.12	996.479	919.289	1403.51	1232.49	1245.15	1386.74	1129.25	1625.75
Rock2	3898.77	-0.695738	0.155928	-4.46193	8.12252e-06	0.000104299	3528.56	6176.08	4230.45	5489.31	4281.76	5218.49	2322.07	4008.15	2755.55	3439.68	3095.91	2239.27
Cplx3	50.9682	-1.0192	0.228548	-4.45946	8.21658e-06	0.000105422	84.2013	66.4896	59.568	74.0687	40.2279	85.4711	36.0434	33.6135	29.08	21.7357	32.2084	48.9108
Snap47	12072.3	-0.163532	0.036732	-4.45204	8.50594e-06	0.000108958	13134.1	12680.9	12728.4	12637.5	13139.4	12216.7	10945.2	11804.4	11526.2	11773.2	11196.8	11084.7
Aff1	323.541	-0.924318	0.207615	-4.45208	8.50424e-06	0.000108958	244.71	594.057	358.532	493.791	360.375	490.034	154.004	331.042	215.015	232.572	237.171	171.188
Flnb	1598.73	-0.301011	0.067678	-4.4477	8.67962e-06	0.000111093	1610.35	1872.27	1883.7	1757.66	1670.3	1793.94	1293.19	1518.72	1405.53	1337.83	1601.64	1439.68
Frg1	620.926	0.319094	0.0717715	4.44597	8.74975e-06	0.000111901	526.258	554.288	543.979	539.643	569.895	578.354	724.145	697.734	689.107	652.072	597.319	778.32
Rimbp2	3859.14	0.240797	0.0541675	4.44542	8.77205e-06	0.000112096	3407.52	3783.7	3345.92	3610.56	3286.12	3789.22	4010.65	4378.92	4093.22	3986.33	4296.41	4321.17
Hnmt	1180.48	0.760068	0.170988	4.44515	8.78291e-06	0.000112145	1164.35	672.975	860.926	830.04	1015.75	717.008	2191	977.847	1366.76	1618.23	1378.13	1372.69
Tmem25	1033.53	-0.275005	0.0618773	-4.44436	8.81521e-06	0.000112466	1085.41	1106.71	1221.71	1026.38	1178.34	1170	991.74	1001.27	933.202	910.728	878.411	898.471
Cdc42ep2	611.451	-0.581105	0.130817	-4.44212	8.90762e-06	0.000113554	665.716	727.036	810.349	623.118	815.453	755.944	382.279	605.043	573.668	566.216	437.253	375.338
Esyt2	1420.48	-0.381823	0.0859633	-4.4417	8.92504e-06	0.000113669	1398.53	1859.22	1546.52	1629.51	1586.49	1619.2	1128.27	1389.36	1201.09	1279.15	1057.02	1351.43
Poglut1	1642.59	0.321131	0.0723043	4.44139	8.93809e-06	0.000113669	1595.88	1394.42	1534.16	1413.18	1497.65	1331.45	2033.72	1623.63	1905.18	1855.15	1881.75	1644.89
Dok4	2282.01	0.490097	0.110346	4.44145	8.93561e-06	0.000113669	2131.35	1627.44	2083.76	1762.37	1910.83	1875.62	2674.86	2177.75	2620.72	2334.42	2652.8	3532.21
Nodal	17.9057	-1.78353	0.401665	-4.44034	8.98188e-06	0.000114135	19.7347	22.9917	29.222	54.0819	20.114	20.8929	4.3689	8.14872	12.337	13.0414	7.8081	2.12656
Ugt8a	58.1175	-1.03272	0.232691	-4.43817	9.07278e-06	0.000115197	46.0476	77.0534	66.3115	111.691	56.9895	110.163	45.8734	35.6507	40.5357	41.2979	37.0885	28.7085
Hsbp1	13210.6	0.252399	0.0568834	4.43713	9.11647e-06	0.00011566	13203.8	11435.6	11602.3	12112	12246	11752.3	15692	12974.8	14451.9	14038	14052.6	14965.7
Cerk	2488.62	0.325239	0.0733096	4.43651	9.14278e-06	0.000115901	2057.67	2403.57	2083.76	2216.18	2150.52	2340.01	2702.16	2886.68	2606.62	2807.17	3195.46	2413.64
Samd10	3014.26	0.37222	0.0839061	4.43615	9.15823e-06	0.000116004	2631.29	2579.43	2570.42	2813.44	2810.92	2360.9	3663.32	3115.87	3620.01	3661.39	3631.74	2712.43
Kctd12b	65.1407	1.09403	0.246753	4.43372	9.26206e-06	0.000117226	32.8911	59.6543	42.7091	25.8653	23.4663	62.6788	90.6546	97.7847	61.6848	95.6373	78.081	110.581
Fgd5	258.276	-0.499663	0.112734	-4.43224	9.32593e-06	0.00011794	297.336	268.444	307.955	291.572	352.832	297.249	212.984	209.83	225.59	195.622	169.826	270.073
Ptgds	39.5517	1.13662	0.256455	4.43203	9.33481e-06	0.000117959	23.6816	19.8848	19.1067	19.9868	38.5517	26.591	78.6402	49.9109	64.3284	41.2979	34.1604	58.4804
Aen	2662.43	0.362024	0.0817244	4.42981	9.43145e-06	0.000119085	2066.88	2571.35	2272.58	2431.33	2280.42	2355.2	2787.36	3146.43	3019.03	2958.23	3524.38	2535.92
Postn	407.887	-0.835838	0.188743	-4.42844	9.49193e-06	0.000119754	564.412	474.749	504.642	648.983	504.525	440.651	293.808	311.689	304.018	402.111	314.276	130.783
Zfp451	3579.66	0.405165	0.0915488	4.42568	9.6141e-06	0.000121199	3079.93	3366.12	2867.13	2936.88	2927.42	3301.08	3942.93	3891.01	3900.24	4259.12	3363.34	5120.75
Mad1l1	428.937	0.471767	0.106648	4.42358	9.70781e-06	0.000122283	427.585	362.897	287.725	397.385	342.775	339.985	543.928	433.919	456.467	469.492	588.535	496.551
Manba	181.935	-0.525181	0.118746	-4.42272	9.74644e-06	0.000122672	222.344	198.848	258.503	193.989	225.444	190.885	141.989	137.51	185.054	142.369	127.858	158.429
Wdr47	8031.49	0.224122	0.0506812	4.42218	9.77087e-06	0.000122882	7336.04	7657.49	7598.85	7164.68	7774.88	6918.41	8570.69	8309.66	9076.47	8470.42	8148.73	9351.54
Mgll	1970.09	-0.606328	0.137228	-4.41841	9.94314e-06	0.00012495	3012.83	1535.48	2433.3	2192.67	2577.1	2519.5	1947.44	1334.35	1575.6	1566.06	1386.91	1559.83
Igsf10	331.41	-0.655052	0.148265	-4.41813	9.95601e-06	0.000125013	315.755	447.407	390.002	405.614	439.155	433.054	174.756	335.116	274.057	317.342	223.507	221.162
Nans	1821.71	-0.298817	0.0676369	-4.41795	9.964e-06	0.000125014	2005.04	1904.59	2059.03	2199.72	2017.26	1876.57	1607.75	1678.64	1698.09	1697.56	1738.28	1378.01
Pramel12	979.613	0.264633	0.0599297	4.41572	1.00675e-05	0.000126213	913.058	919.049	915.998	820.634	910.994	858.51	1056.18	1028.78	1122.66	1088.96	971.132	1149.4
Wsb2	11947.2	0.288225	0.0652982	4.41399	1.01485e-05	0.000127128	10544.9	11259.7	11023.5	9618.35	10727.4	11369.6	12318.1	13050.2	13654.4	11993.8	12831.6	14975.2
Pgbd5	2901.55	0.299325	0.067853	4.41137	1.0272e-05	0.000128574	2715.49	2373.74	2732.26	2490.12	2661.75	2640.11	3394.63	2959	3338.03	2815.87	3151.54	3546.04
Ptpn11	5239.38	-0.316116	0.0716676	-4.41086	1.02959e-05	0.000128772	5446.77	6409.73	5474.64	5710.35	5575.76	6246.04	4161.38	5211.11	4720.65	4349.32	4489.66	5077.16
Atp6v1c1	5786.78	0.195411	0.044314	4.40969	1.03521e-05	0.000129372	5146.8	5665.29	5231.87	5457.57	5412.33	5452.11	6447.4	6149.23	6037.17	6095.79	6539.28	5806.57
Emid1	229.61	-0.576559	0.130763	-4.40918	1.03761e-05	0.00012957	336.805	254.773	254.007	221.03	298.357	284.904	157.28	215.941	170.955	158.671	170.802	231.795
Bsg	19982.5	-0.297018	0.0673713	-4.40867	1.04006e-05	0.000129775	21127.9	19998.5	22930.3	20823.9	23437.8	23874.9	18138.6	19947.1	18452.6	17737.5	15774.3	17546.2
Trpv2	813.337	-0.412701	0.0936291	-4.40783	1.04413e-05	0.00013018	839.382	920.913	991.301	912.338	947.87	961.075	625.845	789.407	776.347	797.702	575.847	622.018
Amfr	5903.79	-0.160173	0.0363448	-4.40704	1.04795e-05	0.000130452	6307.2	6285.45	6233.28	6238.23	6196.77	6127.33	5632.6	5548.26	5841.55	5633.9	5208	5592.85
Mir6236	572.167	0.575449	0.130571	4.40717	1.04732e-05	0.000130452	464.423	447.407	592.308	423.25	388.87	442.55	643.32	551.057	623.016	771.619	905.739	612.449
Slc7a5	5943.86	-0.443811	0.100756	-4.4048	1.05884e-05	0.000131704	5620.44	7886.79	6573.83	6956.58	6876.46	7189.07	4105.67	6113.58	5031.71	4925.32	5471.52	4575.29
Adcy7	221.187	-0.625255	0.142013	-4.4028	1.06864e-05	0.000132819	347.33	221.839	277.609	213.976	308.414	243.118	162.741	177.235	202.678	146.716	147.378	205.213
Sfxn4	244.24	-0.500633	0.113916	-4.39476	1.10894e-05	0.00013772	330.227	241.724	283.229	297.451	318.471	248.816	234.828	176.216	218.54	192.361	215.699	173.315
Bap1	7262.53	0.209212	0.047616	4.39374	1.11417e-05	0.000138262	6422.98	7019.94	6631.15	6542.74	6433.95	7365.71	7848.72	7696.47	7901.82	7505.35	8165.32	7616.27
Uxs1	951.288	0.285569	0.0650078	4.39284	1.11881e-05	0.000138728	931.477	814.032	824.96	912.338	806.234	860.409	1149.02	956.456	1053.05	1049.84	984.796	1072.85
Elac2	1060.36	-0.256181	0.0583421	-4.391	1.12828e-05	0.000139794	1116.98	1214.21	1113.81	1170.99	1154.04	1152.91	880.333	1080.72	958.757	949.852	942.828	988.85
Cyb5r1	1521.17	-0.823392	0.187538	-4.39055	1.13066e-05	0.00013998	1399.85	2340.19	1808.39	2218.53	1847.13	2048.46	729.606	1650.12	1102.39	1196.55	1237.58	675.182
Crtac1	3218.03	-0.750269	0.170972	-4.38825	1.14266e-05	0.000141355	3203.6	4999.77	3321.2	3924.47	3510.72	5257.42	1936.51	3611.92	2082.3	2485.48	2543.49	1739.52
Sst	14547.9	-0.724485	0.165129	-4.3874	1.14714e-05	0.0001418	15561.5	17586.8	20580.2	18457.2	18919.7	17649.8	9386.58	13842.6	11068.9	13054.5	12831.6	5635.38
Hs3st1	1932.98	-0.591284	0.134812	-4.38601	1.15451e-05	0.000142599	2368.16	2641.57	1988.22	2490.12	1959.43	2493.86	1578.26	1873.19	1320.93	1618.23	1838.81	1025
St8sia3	4084.08	-0.410887	0.0937022	-4.38502	1.15972e-05	0.000143132	4495.56	5183.71	4306.88	4448.83	4786.28	4746.5	3135.78	3948.06	3555.69	3394.04	2810.92	4196.76
Col2a1	54.6352	-0.686057	0.156506	-4.38358	1.16744e-05	0.000143933	65.7823	61.5185	71.9312	75.2444	67.8846	62.6788	45.8734	36.6692	44.0605	43.4715	39.0405	41.4679
Retsat	186.947	-0.545644	0.124478	-4.38347	1.16803e-05	0.000143933	226.291	230.539	215.793	223.382	195.273	241.218	152.911	165.012	166.549	132.588	186.418	107.391
Lamp5	225.376	-0.97215	0.221792	-4.38316	1.16969e-05	0.000144026	351.277	254.773	268.618	343.303	150.017	424.506	171.479	153.807	159.499	82.5958	164.946	179.694
Aoc2	123.121	-0.618121	0.141046	-4.3824	1.17379e-05	0.000144418	153.93	168.399	148.358	122.272	153.369	148.15	73.179	102.878	107.508	98.8976	123.954	76.5561
Fam3c	2939.68	0.285112	0.0650739	4.38136	1.17943e-05	0.000145001	2802.32	2854.71	2311.91	2801.68	2511.73	2616.37	3444.88	3154.57	3082.48	3402.73	3005.14	3287.66
Amy1	685.52	0.544515	0.124355	4.37871	1.19384e-05	0.000146659	664.401	438.086	586.689	526.711	579.114	554.612	999.385	618.284	847.725	710.759	924.284	776.194
Ap5m1	771.855	0.412277	0.0941787	4.3776	1.19991e-05	0.00014729	620.985	664.896	699.081	634.875	740.026	611.593	964.434	769.036	816.882	1066.14	907.691	766.624
Mblac2	3003.49	0.50798	0.116047	4.37736	1.20126e-05	0.000147342	2903.63	2246.98	2306.29	2601.81	2603.08	2220.35	4188.68	2825.57	3051.63	4387.36	3098.84	3607.71
Slc9a5	1467.11	0.256444	0.0586456	4.37278	1.22673e-05	0.00015035	1269.6	1226.64	1443.12	1307.37	1309.92	1468.2	1541.13	1667.43	1563.27	1623.66	1635.8	1549.2
Pdcl3	995.07	-0.384081	0.0879393	-4.36757	1.25635e-05	0.000153646	1291.96	1000.45	1085.71	1259.17	1108.78	1018.06	880.333	830.151	827.457	1018.32	844.251	776.194
Tspan2	1395.98	-0.421625	0.0965314	-4.36775	1.25534e-05	0.000153646	1876.11	1437.29	1560.01	1602.47	1652.7	1464.4	1399.14	1104.15	1220.48	1281.32	945.756	1207.89
P2rx4	246.07	0.394651	0.09036	4.36754	1.25653e-05	0.000153646	194.715	204.44	211.298	219.855	234.663	208.929	313.468	268.908	269.65	293.433	241.075	292.402
Car2	536.531	0.460293	0.105405	4.36691	1.26019e-05	0.000153976	507.839	420.687	454.065	469.102	427.421	433.054	750.358	546.983	593.055	545.567	541.687	748.549
Sco1	372.394	-0.371795	0.0851653	-4.36556	1.26795e-05	0.000154804	393.378	416.958	418.1	486.737	386.356	420.708	301.454	333.079	342.791	364.074	320.132	284.959
Lrrc24	673.238	-0.396279	0.0907815	-4.3652	1.27009e-05	0.000154947	748.602	786.069	796.862	788.891	734.997	736.001	584.34	689.586	546.351	507.53	670.52	489.108
Gpat4	4273.19	-0.309053	0.0708279	-4.36343	1.28039e-05	0.000156084	4210.06	5189.3	4558.64	4820.34	4633.75	4959.22	3451.43	4325.95	3981.31	3935.26	3629.79	3583.25
Wdr41	1208.43	-0.242244	0.0555308	-4.36234	1.28682e-05	0.000156747	1334.06	1340.36	1292.51	1221.55	1348.47	1319.1	1046.35	1149.99	1112.09	1031.36	1093.13	1212.14
Shtn1	7517.25	0.241897	0.0554969	4.35874	1.30813e-05	0.000159221	7191.32	6474.35	6961.59	7077.68	7149.67	6480.61	8311.83	7515.16	8190.85	8038.96	7786.63	9028.3
Zswim4	826.206	-0.360282	0.0827209	-4.35539	1.32828e-05	0.00016155	853.854	958.818	915.998	988.759	869.09	986.716	618.199	841.355	717.306	681.415	800.33	682.625
A830036E02Rik	326.881	0.493868	0.113425	4.35413	1.33594e-05	0.000162357	292.073	244.21	280.981	241.017	275.729	296.3	389.924	311.689	438.843	352.119	331.844	467.843
Kifc3	1460.91	-0.319505	0.0733995	-4.35297	1.34308e-05	0.0001631	1682.71	1518.7	1775.8	1682.42	1607.44	1468.2	1159.94	1386.3	1191.4	1262.85	1345.92	1449.25
Creld2	605.69	-0.571431	0.131298	-4.35218	1.34792e-05	0.000163438	598.619	736.979	742.914	911.163	737.512	618.241	456.55	505.221	563.094	520.571	544.615	332.806
Dnajc21	303.219	-0.496651	0.114113	-4.35228	1.34731e-05	0.000163438	381.537	297.029	382.134	313.91	403.117	352.331	244.658	243.443	257.314	302.127	195.202	265.82
Rimkla	1120.3	0.33688	0.0774309	4.35072	1.35693e-05	0.000164404	1032.78	1011.64	944.096	975.826	1113.81	861.359	1388.22	1086.84	1311.24	1209.59	1261.01	1247.23
Usp38	1052.69	0.357504	0.0821846	4.35002	1.36127e-05	0.000164805	874.904	1071.91	828.332	893.527	822.996	1040.85	1105.33	1161.19	1187.87	1211.77	1132.17	1301.45
Dusp14	517.536	0.292873	0.0673452	4.34882	1.36869e-05	0.000165577	459.16	492.769	443.95	456.169	451.726	484.336	561.403	564.299	558.688	625.989	597.319	514.627
Tubgcp3	1842.36	0.288121	0.0662866	4.3466	1.38264e-05	0.000167137	1773.49	1600.72	1644.3	1823.5	1618.34	1498.59	2168.07	1770.31	2054.98	2040.99	2067.19	2047.88
Dnaaf9	5274.24	0.190439	0.043821	4.34585	1.38735e-05	0.000167579	4933.67	5234.04	4918.29	4729.82	4844.11	4894.65	5739.64	5464.74	5779.86	5395.9	5395.4	5960.74
Tdo2	24.9065	1.26715	0.291608	4.34538	1.39033e-05	0.000167812	14.4721	16.1564	19.1067	12.9326	13.4093	11.3961	53.519	19.3532	33.486	45.6451	25.3763	34.0249
Scmh1	1694.83	0.352423	0.0811144	4.34477	1.39421e-05	0.000168153	1444.58	1685.85	1419.52	1372.03	1530.34	1475.8	1756.3	1918.01	1905.18	1741.03	1784.15	2305.19
Sytl5	77.4043	-0.637877	0.146847	-4.34381	1.40034e-05	0.000168763	77.6231	105.638	105.649	99.934	85.4843	90.2195	66.6257	62.134	54.6351	59.7733	72.2249	48.9108
Zbtb37	2127.91	0.342941	0.0789721	4.34256	1.40834e-05	0.000169599	1630.08	2066.15	1845.48	1871.7	1788.47	2049.41	2291.49	2532.22	2225.94	2411.58	2112.09	2710.3
Chd2	2501.72	-0.41488	0.0955972	-4.33988	1.42563e-05	0.000171551	2368.16	3402.78	2672.69	3082.67	2769.86	2854.73	1850.23	2506.75	2178.35	2108.37	2265.32	1960.69
Slc16a3	646.523	-0.868886	0.200229	-4.33945	1.42839e-05	0.000171753	769.652	610.835	971.071	476.156	1035.03	1150.06	419.414	626.433	445.011	469.492	304.516	480.602
Aak1	9631.3	-0.300635	0.0693016	-4.33807	1.43739e-05	0.000172705	9601.58	12235.3	10332.2	10819.9	9778.73	11014.4	8056.25	9549.28	8407.63	8396.52	8405.42	8978.33
Tram1	1354.44	-0.355294	0.08192	-4.33708	1.44386e-05	0.000173351	1407.74	1580.22	1375.68	1769.42	1395.41	1592.61	1233.12	1261.01	1120.9	1312.84	1163.41	1040.95
Arhgap12	1756.06	-0.322854	0.0745063	-4.33325	1.46926e-05	0.000176266	1919.53	1959.89	1991.59	1942.25	2164.76	1731.26	1574.99	1546.22	1655.8	1771.46	1385.94	1429.05
Mfap1a	883.915	0.329443	0.076036	4.33273	1.47272e-05	0.000176549	747.286	861.88	708.072	765.377	752.597	860.409	960.065	988.032	951.708	931.377	935.02	1145.15
Psmc2	2975.89	0.193779	0.0447494	4.33032	1.48892e-05	0.000178356	2710.23	2908.77	2640.1	2878.1	2796.68	2719.88	3192.57	3161.7	3286.03	3045.18	3041.25	3330.19
Olfr31	16.5477	-1.70082	0.392878	-4.32913	1.49701e-05	0.000179189	30.2598	22.9917	30.346	38.7979	9.2189	20.8929	4.3689	12.2231	9.69332	8.6943	6.83209	4.25312
Dhx9	8469.7	0.227731	0.0526178	4.32802	1.50453e-05	0.000179954	7742.57	8063.27	7847.24	7920.65	8126.04	7114.04	9196.53	8774.14	9430.72	8732.33	8685.53	10003.3
Prkcz	5744.46	-0.212187	0.0490302	-4.32767	1.50696e-05	0.000180109	6190.11	6127.61	6444.58	5952.54	6122.18	6161.52	5257.97	5612.43	5525.19	4855.76	5056.72	5626.87
Gria3	2169.98	-0.301693	0.0697419	-4.32586	1.5194e-05	0.000181459	2255.02	2672.01	2218.63	2458.38	2482.4	2284.93	1781.42	2176.73	1863.76	1924.7	1838.81	2082.96
Fam118b	663.426	0.326145	0.0754134	4.32477	1.52693e-05	0.000182222	563.096	560.502	600.176	580.793	671.303	555.562	762.373	627.452	762.247	775.966	733.961	767.688
Mcf2l	8754.77	0.259614	0.0600723	4.32168	1.54843e-05	0.000184649	8093.85	7900.46	8650.85	7452.72	7826.84	7890.88	9230.39	9146.94	9058.85	9101.84	9768.91	10934.8
Rdh10	337.292	0.407636	0.0943367	4.32108	1.55266e-05	0.000184908	323.649	269.687	282.105	312.735	248.91	305.797	443.443	337.153	362.178	408.632	364.053	389.16
Ak2	959.194	0.380744	0.0881173	4.32088	1.55409e-05	0.000184908	907.795	728.901	813.721	882.946	885.014	785.384	1256.06	970.716	1057.45	1086.79	1195.61	939.939
Zfp783	60.163	-0.848101	0.196276	-4.32095	1.55356e-05	0.000184908	82.8856	82.646	77.5508	84.65	48.6087	88.3201	36.0434	33.6135	37.8921	41.2979	59.5367	48.9108
Sema3c	1395.08	-0.322222	0.0746213	-4.3181	1.57378e-05	0.000187111	1628.77	1594.51	1386.92	1614.23	1475.02	1600.21	1356.54	1248.79	1140.29	1410.65	1117.53	1167.48
Plpp5	1142.47	-0.245615	0.0569313	-4.31424	1.60156e-05	0.000190271	1291.96	1170.71	1262.17	1326.18	1265.5	1125.37	1058.37	1004.33	1053.05	1094.39	1056.05	1001.61
Gatd1	1241.5	0.195633	0.0453534	4.31352	1.60672e-05	0.000190741	1163.03	1136.54	1192.48	1113.38	1161.58	1180.45	1283.36	1346.58	1388.79	1311.75	1342.02	1278.06
Chrm3	739.571	-0.462171	0.107179	-4.31214	1.61679e-05	0.000191793	785.44	1015.37	759.773	761.85	785.282	1031.35	537.374	723.199	630.066	668.374	573.895	602.879
Ndrg1	2224.38	-0.579511	0.134453	-4.31015	1.63145e-05	0.000193387	2290.54	2365.66	3194.19	2413.7	3322.99	2404.59	1379.48	1858.93	2215.36	1754.07	1437.67	2055.32
Clpb	2740.82	0.195894	0.0454523	4.30989	1.63336e-05	0.00019347	2457.63	2616.09	2502.98	2742.89	2567.04	2443.52	2822.31	2948.82	3002.29	2812.6	3054.92	2918.7
Trafd1	2812.49	-0.193706	0.0449506	-4.30932	1.63758e-05	0.000193825	2978.62	2923.06	3212.18	3033.29	2939.15	2925.96	2481.53	2672.78	2742.33	2616.98	2698.67	2525.29
Ung	79.8606	-0.826529	0.191851	-4.30819	1.646e-05	0.000194676	111.83	79.539	101.153	94.0555	113.979	112.062	70.9946	83.5244	42.2981	56.5129	37.0885	55.2905
Mpped1	14356.4	0.379079	0.0880062	4.30742	1.65171e-05	0.000195061	11598.7	12311.8	14005.2	10834	12430.4	13704.8	14970	15659.8	17265.6	14705.3	15147.7	19643
Amz1	347.896	-0.398588	0.0925325	-4.30755	1.65075e-05	0.000195061	431.532	357.304	423.719	344.478	416.526	402.664	291.624	285.205	333.979	267.35	280.116	340.249
Fundc2	1331.67	-0.50718	0.117773	-4.30641	1.65923e-05	0.000195804	1955.05	1277.6	1449.86	1621.28	1579.78	1498.59	1420.98	916.731	1040.71	1173.73	975.036	1070.72
Dhrs13	895.234	-0.292043	0.0678279	-4.30565	1.66496e-05	0.000196188	1027.52	861.258	1020.52	1026.38	1044.25	938.283	858.488	795.519	843.319	807.483	780.81	738.979
Spag4	335.896	-0.605328	0.140587	-4.30572	1.66446e-05	0.000196188	351.277	432.493	432.711	477.332	331.042	407.412	234.828	333.079	248.501	306.474	293.78	181.821
Adora1	3224.53	0.387991	0.090138	4.30441	1.67429e-05	0.000197142	2380	3182.18	2737.88	2559.49	2848.64	3047.52	2940.27	3943.98	3601.51	3729.85	3978.23	3744.87
Ints6	612.531	-0.306361	0.0711833	-4.30383	1.67867e-05	0.000197511	634.141	730.765	669.859	717.173	657.894	651.48	506.792	582.634	552.519	592.299	487.03	567.791
Prkd1	198.189	0.551391	0.128133	4.30326	1.683e-05	0.000197874	135.511	160.321	149.482	166.949	160.912	189.936	251.212	216.96	257.314	220.618	176.658	292.402
Slc25a51	3921.98	0.18029	0.0419	4.30287	1.68601e-05	0.000198081	3541.72	3920.4	3663.99	3460.07	3791.48	3675.26	4089.29	4224.09	4155.79	4160.22	4285.67	4095.75
Rnh1	724.436	-0.397576	0.0924062	-4.30248	1.68898e-05	0.000198283	782.809	883.007	805.854	872.365	728.293	869.906	630.214	709.957	653.858	566.216	691.017	499.741
Gnao1	31723.4	-0.276188	0.0642088	-4.3014	1.69725e-05	0.000199107	32999	37827	32965.8	34460.8	33938.9	36309.1	25185.6	32007.2	28665.8	29045.5	27292.2	29984.5
Plek	178.683	-0.453766	0.105499	-4.30113	1.6993e-05	0.000199201	207.872	181.448	210.174	242.193	203.654	195.634	172.571	158.9	140.994	153.237	130.786	146.733
Map3k4	1534.05	0.260193	0.060528	4.29871	1.71793e-05	0.000201055	1276.18	1516.21	1310.5	1476.67	1356.02	1435.91	1525.84	1730.58	1654.03	1683.43	1756.82	1686.36
Nrip3	4580.78	0.276769	0.064386	4.29859	1.71892e-05	0.000201055	3789.06	4428.71	4175.38	4683.96	3669.96	4108.31	5149.84	4884.14	4970.91	5108.99	5208.98	4791.14
Tiprl	2327.23	-0.177052	0.0411883	-4.29859	1.71887e-05	0.000201055	2430	2487.46	2580.53	2472.48	2470.66	2377.05	2165.88	2228.68	2188.93	2236.61	2053.53	2235.01
Lsp1	128.545	0.585593	0.136255	4.29776	1.72533e-05	0.000201656	88.1482	112.473	109.021	101.11	95.5413	109.213	113.591	176.216	154.212	192.361	150.306	140.353
Rarb	525.657	-0.737298	0.171572	-4.29731	1.7288e-05	0.000201889	819.647	457.971	534.988	648.983	799.53	681.869	518.807	324.93	348.959	414.066	273.283	484.855
Myh8	529.286	-0.678144	0.157811	-4.29718	1.72986e-05	0.000201889	511.786	695.966	552.971	748.917	584.981	812.925	383.371	538.834	298.73	406.458	500.694	315.794
Pak2	1839.17	-0.46112	0.107315	-4.29688	1.73216e-05	0.000202009	1941.89	2412.89	1966.87	1930.49	2221.75	2306.77	1311.76	1825.31	1599.4	1608.44	1198.54	1745.9
Fermt2	1512.69	0.223398	0.0520122	4.2951	1.74614e-05	0.00020349	1366.96	1434.81	1501.56	1288.56	1437.31	1341.9	1618.68	1580.85	1601.16	1719.3	1675.81	1585.35
Sostdc1	120.625	0.770871	0.179586	4.2925	1.76676e-05	0.000205742	52.6258	114.959	67.4355	96.4069	112.303	87.3705	111.407	171.123	149.806	158.671	154.21	171.188
Efnb2	7014.36	0.274183	0.0638879	4.29163	1.77367e-05	0.000206396	5869.09	7185.23	5834.29	6364.03	6033.35	6805.4	7392.18	8009.17	7399.53	7372.76	7723.18	8184.06
Sh3bp5	2540.59	-0.26413	0.0615535	-4.29107	1.77813e-05	0.000206763	2690.49	2814.31	2755.86	2587.7	3066.54	2717.03	2139.67	2392.67	2384.56	2217.05	2173.58	2547.62
Ebna1bp2	1865.89	0.293186	0.068358	4.28898	1.79497e-05	0.000208568	1806.38	1489.49	1748.83	1732.97	1654.37	1636.3	2199.74	1791.7	2100.81	1951.87	2109.16	2169.09
H3f3b	11892.7	0.337374	0.0787192	4.28578	1.82096e-05	0.000211433	11672.4	9578.24	9970.33	11145.6	10409	10278.4	15437.5	11434.7	12219.7	13540.3	12919.5	14106.5
Pdcd6	1927.78	0.255821	0.0597352	4.28259	1.84734e-05	0.00021434	1769.54	1759.8	1710.61	1748.26	1698.79	1856.62	2247.8	2034.12	2118.43	2252.91	2114.04	1822.46
Plod2	451.778	-0.513215	0.119882	-4.28101	1.86048e-05	0.000215708	490.736	530.053	522.625	499.67	636.942	506.179	404.123	407.436	363.94	443.409	362.101	254.124
Rcan3	4662.13	-0.241723	0.0564683	-4.28068	1.86321e-05	0.000215866	5271.79	5076.21	4786.79	5134.26	5201.97	4839.56	4600.45	4249.56	4301.19	4560.16	4138.29	3785.27
Cdk4	2221	0.260758	0.0609267	4.27987	1.87002e-05	0.000216497	2132.66	1830.02	2064.65	1931.66	2106.1	2063.65	2533.96	2121.72	2449.77	2476.79	2438.08	2502.96
Eif4e3	268.719	0.379312	0.0886924	4.27671	1.89675e-05	0.000219432	260.498	244.831	234.9	219.855	232.987	208.929	335.313	285.205	315.473	318.429	304.516	263.693
Fnip2	1551.18	0.364823	0.0853277	4.27555	1.90664e-05	0.000220415	1180.13	1579.6	1281.27	1262.7	1387.02	1438.76	1576.08	1770.31	1721	1723.64	1642.63	2051.07
Pfkfb4	791.815	0.466037	0.109028	4.27447	1.9159e-05	0.000221325	718.342	569.201	712.568	710.119	622.694	660.977	978.633	719.125	980.788	810.743	874.507	1144.09
Fam219a	4332.35	-0.376685	0.0881789	-4.27182	1.93882e-05	0.000223809	4491.61	5349	4596.85	4992	4676.49	5260.27	3148.88	4489.95	3672.01	3575.53	3517.55	4218.03
Pitpnb	2048.86	0.234934	0.0550004	4.27149	1.94174e-05	0.000223984	1839.27	1900.86	1789.29	1938.72	1817.8	2006.67	2358.11	2149.23	2220.65	2088.8	2086.71	2390.25
Kdm6b	1681.05	-0.522114	0.122245	-4.27103	1.94569e-05	0.000224277	1589.3	1955.54	2189.4	1886.99	2235.16	2034.21	1037.61	1756.05	1216.07	1253.07	1527.46	1491.78
Dtx4	5815.66	0.464426	0.108752	4.27049	1.9504e-05	0.000224657	4241.64	5102.93	5365.61	4602.84	5077.1	4933.58	5490.61	6665.65	7377.5	6072.97	5979.05	8878.38
Mmp16	2908.89	-0.288171	0.0674966	-4.26941	1.9599e-05	0.000225587	2891.79	3244.32	3146.99	3357.78	3206.5	3340.02	2456.41	3021.14	2354.6	2682.19	2530.8	2674.15
Neurl1b	2801.19	0.326277	0.0764354	4.26866	1.96647e-05	0.00022618	2410.26	2516.66	2716.53	2236.17	2691.08	2342.86	2672.67	3035.4	3268.41	2950.63	3276.47	3497.13
B3gnt9	105.053	-0.567563	0.132972	-4.2683	1.96972e-05	0.00022639	107.883	136.708	142.738	139.908	108.951	115.861	79.7324	97.7847	75.7841	97.8108	81.985	75.4928
Tnks	10110.4	-0.34678	0.0813011	-4.26538	1.99558e-05	0.000229196	10176.5	13496.8	10294	11289	10849	11807.4	8393.74	10110.5	8774.22	8843.19	7976.95	9313.26
Cfl1	38283.4	0.211453	0.0495821	4.26469	2.00179e-05	0.000229744	38186.6	34036.5	34790	35446	37083.4	33359.4	43660.6	38600.5	40399.1	40583.9	42899.6	40355.7
Snip1	561.703	0.3266	0.0766064	4.26335	2.01386e-05	0.000230961	467.054	523.839	497.899	540.819	471.002	488.135	662.98	520.5	618.61	664.027	629.528	656.043
Gabarap	6543.7	-0.382063	0.0896538	-4.26154	2.0302e-05	0.000232566	8212.26	6479.32	7363.95	8017.06	7858.69	6503.4	6387.33	5323.15	6107.67	5887.13	5726.26	4658.23
Ywhah	13125.6	0.172646	0.040513	4.26148	2.03078e-05	0.000232566	12678.9	12764.8	11455	12391.8	12809.2	11943.2	13910.6	13524.8	14139	14154.3	13523.6	14211.8
Snrpc	909.473	-0.344719	0.0809194	-4.26002	2.04406e-05	0.000233918	1036.73	925.884	1009.28	1133.37	1015.75	987.666	849.751	897.378	758.722	771.619	860.843	666.676
Acss1	643.228	0.565075	0.132798	4.25515	2.0891e-05	0.000238728	421.006	567.958	496.775	534.941	450.888	640.084	712.13	815.891	763.129	702.064	1024.81	589.057
Mapkapk3	150.594	0.540486	0.127016	4.25525	2.0882e-05	0.000238728	119.724	136.086	119.136	110.515	108.112	141.502	161.649	205.755	179.767	195.622	194.226	135.036
D130043K22Rik	1314.03	-0.331565	0.0779374	-4.25424	2.09756e-05	0.000239523	1381.43	1467.12	1624.07	1375.56	1657.72	1280.17	1087.86	1160.17	1300.67	1097.65	1142.91	1193
Mkrn2	1627.94	-0.308359	0.0724981	-4.25334	2.10603e-05	0.000240317	1843.22	1693.93	1920.79	1896.39	1788.47	1668.59	1477.78	1500.38	1510.4	1537.8	1510.87	1186.62
Tyw3	299.745	0.359573	0.0845838	4.25109	2.12729e-05	0.000242569	238.132	295.164	247.263	248.071	266.51	274.457	366.987	304.558	333.979	344.511	321.108	356.199
Ankrd46	7411.33	0.201629	0.0474331	4.25082	2.12989e-05	0.000242691	7162.37	6670.09	7244.82	6850.77	6993.79	6449.27	8258.31	7343.02	8302.77	7840.08	7812	8008.62
Arpc4	2977.15	0.27307	0.0643143	4.24587	2.17742e-05	0.00024793	2645.76	2758.39	2712.03	2587.7	2622.36	2849.04	3302.89	3309.4	3262.24	2950.63	2970.98	3754.44
Ube2j2	1238.51	0.252077	0.0593854	4.24477	2.18821e-05	0.000248979	1107.77	1118.52	1128.42	1129.84	1138.11	1160.51	1447.2	1291.57	1300.67	1274.8	1507.94	1256.8
Anks1b	4453.7	-0.22614	0.0532869	-4.24382	2.19744e-05	0.00024985	4636.33	5060.05	4671.03	4924.98	4611.96	4905.09	3805.31	4211.87	4075.6	3987.42	3987.99	4566.78
Eri3	4855.27	0.16603	0.0391487	4.24099	2.22533e-05	0.000252841	4600.81	4462.88	4622.7	4735.69	4430.94	4610.69	5155.3	5074.62	5232.63	4820.99	5135.78	5380.19
Gid8	1757.98	0.22963	0.0541669	4.2393	2.24218e-05	0.000254573	1657.71	1641.11	1633.06	1533.1	1557.16	1687.58	2027.17	1735.68	1947.48	1819.28	1856.38	2000.03
Septin7	9647.21	-0.428911	0.101206	-4.23801	2.25513e-05	0.00025586	12176.3	10000.2	11273	12742.2	10807.1	9428.41	8828.45	7706.65	7931.78	10168	7902.77	6801.8
Neurod6	8401.12	0.295556	0.0697498	4.23738	2.26142e-05	0.000256391	7146.58	7256.69	7947.27	7298.71	7089.33	8522.42	9099.32	8650.89	9513.55	10304.9	8259.02	9724.75
Gls2	245.592	-0.704622	0.166376	-4.23511	2.28441e-05	0.000258813	224.975	264.094	365.275	311.559	340.261	320.042	185.678	211.867	209.728	247.787	142.498	123.34
Khdrbs3	4528.33	0.23792	0.0561821	4.2348	2.28757e-05	0.000258987	4165.33	3996.21	4336.1	4097.29	4461.11	3879.44	4692.2	4670.24	4998.23	5118.77	4585.31	5339.79
Hk2	1003	-1.48948	0.35184	-4.23341	2.30172e-05	0.000260403	948.58	1229.13	1935.4	832.391	2298.02	1631.55	379.002	739.496	734.049	621.642	203.987	482.729
Rassf7	272.492	-0.955179	0.225701	-4.23205	2.31573e-05	0.000261801	272.339	214.383	514.757	236.314	591.685	327.639	222.814	170.105	207.966	183.667	158.114	170.125
Plcxd3	785.107	0.297421	0.0702815	4.23186	2.31772e-05	0.000261839	706.501	762.456	651.876	707.768	703.15	690.417	881.425	951.363	763.129	932.463	816.922	853.813
Rab11fip3	2947.89	-0.306391	0.0724079	-4.23145	2.32188e-05	0.000262124	3120.71	3546.94	3282.98	3262.55	3156.21	3188.07	2259.81	2973.26	2625.13	2401.8	2872.4	2684.78
Ipo8	1333.51	0.306743	0.072506	4.23059	2.33078e-05	0.000262941	1070.94	1320.47	1176.75	1255.64	1107.94	1218.44	1334.7	1497.33	1587.06	1513.89	1341.04	1577.91
Fbxo10	1445.65	0.271002	0.0640743	4.2295	2.34209e-05	0.00026403	1344.59	1336.01	1314.99	1193.33	1334.23	1337.15	1435.18	1552.33	1564.15	1487.81	1655.32	1792.69
Zfp654	637.055	-0.396801	0.0938218	-4.2293	2.3442e-05	0.00026408	747.286	722.687	784.499	664.267	801.206	622.989	578.879	562.262	496.122	614.035	452.87	597.563
Ggps1	2013.29	0.398002	0.0941442	4.22758	2.36223e-05	0.000265923	1864.27	1623.09	1847.73	1888.16	1790.14	1413.12	2626.8	1907.82	2132.53	2499.61	2373.66	2192.48
Dennd2d	11.1087	-1.80264	0.426501	-4.22659	2.37264e-05	0.000266905	26.3129	13.6708	17.9828	14.1083	18.4378	13.2955	7.64557	4.07436	7.04969	4.34715	0	6.37968
C1qtnf12	80.5413	-0.735282	0.174012	-4.22548	2.38437e-05	0.000268034	119.724	81.4032	107.897	98.7583	96.3794	100.666	78.6402	60.0968	49.3478	36.9508	65.3928	71.2397
Ltk	157.786	-0.570542	0.135077	-4.22382	2.40191e-05	0.000269816	198.662	164.671	200.059	144.61	246.396	177.59	120.145	134.454	144.519	123.894	127.858	110.581
Recql4	121.014	-0.747481	0.177012	-4.22277	2.41319e-05	0.000270891	139.458	159.078	157.349	177.53	112.303	165.244	69.9024	74.3571	95.1708	101.071	133.714	66.9866
Sdc1	408.693	-0.528785	0.125293	-4.2204	2.43871e-05	0.000273563	469.685	392.724	567.582	435.007	605.095	427.356	288.347	322.893	377.158	384.723	284.996	348.756
Me3	583.798	-0.462953	0.109719	-4.21943	2.4492e-05	0.000274351	647.297	713.366	618.158	637.226	667.113	774.938	481.671	606.061	480.26	458.624	367.957	552.905
Med18	111.606	0.537516	0.127386	4.21958	2.44758e-05	0.000274351	107.883	96.9382	88.79	85.8257	84.6462	82.6221	144.174	152.789	129.538	117.373	108.337	140.353
Nrp2	5982.87	0.272545	0.0646232	4.21745	2.47083e-05	0.00027658	5648.06	5396.85	5181.29	5778.54	5733.31	4779.73	7254.55	6149.23	6417.86	6394.66	6896.5	6163.83
Opcml	7308.35	0.390195	0.0926495	4.21152	2.53656e-05	0.000283737	5630.96	7140.49	6238.9	6275.85	6586.48	6078.89	7460.99	8567.36	8347.71	8206.33	6877.96	10288.3
Sms	4860.56	0.291177	0.0691489	4.21087	2.54388e-05	0.000284357	4600.81	4177.66	4333.85	4299.51	4499.66	4320.09	5614.03	4954.42	5507.57	5272	4596.04	6151.07
Gm1976	662.08	0.476977	0.113303	4.20976	2.55642e-05	0.000285556	634.141	482.827	568.706	564.333	569.057	505.229	934.944	614.21	768.416	712.932	671.496	918.673
Dgcr8	966.462	0.253915	0.060329	4.20884	2.56681e-05	0.000286516	924.899	924.02	873.289	852.378	861.548	852.812	1029.97	1008.4	1075.96	1027.01	983.82	1183.43
Rbm45	760.086	0.320422	0.0761338	4.20867	2.56877e-05	0.000286533	713.08	717.094	660.868	661.916	613.476	689.467	826.814	819.965	809.833	754.23	856.939	997.356
Gm9776	107.746	0.576362	0.136961	4.20823	2.57375e-05	0.000286888	77.6231	96.9382	71.9312	108.164	72.075	91.1692	149.635	140.565	112.795	127.154	126.882	118.024
Anapc15	451.27	0.417978	0.0993587	4.20675	2.59065e-05	0.000288569	456.529	340.526	414.728	356.235	375.46	378.922	561.403	421.696	529.608	516.224	587.559	476.349
Spin1	11119.7	0.259393	0.0616662	4.20641	2.59463e-05	0.00028881	10133.1	10226.4	10427.8	9683.01	10618.5	9645.89	12608.6	11192.3	12723.8	12048.1	10716.6	13412.2
Itgb3	97.3154	-0.94124	0.223784	-4.20603	2.599e-05	0.000289093	107.883	134.843	144.986	77.5958	149.178	152.898	36.0434	102.878	71.3781	76.0751	56.6087	57.4171
Airn	41.1192	0.861433	0.20484	4.2054	2.60627e-05	0.000289699	27.6285	23.6131	29.222	28.2167	36.8756	29.44	57.8879	38.7064	42.2981	67.3808	53.6807	58.4804
Amigo3	118.423	-0.57881	0.137765	-4.20142	2.65249e-05	0.00029463	130.249	160.321	140.491	149.313	134.931	135.804	91.7469	115.101	100.458	80.4222	114.193	68.0499
Rem2	645.885	0.413791	0.098497	4.20105	2.6568e-05	0.000294903	515.733	582.25	500.146	603.131	510.392	610.644	709.946	782.277	675.007	764.011	892.075	605.006
Inpp5k	900.439	0.261989	0.0623813	4.1998	2.67154e-05	0.000296332	845.96	846.345	802.482	830.04	756.787	832.868	917.469	996.181	983.431	915.075	976.012	1102.62
Dnmt1	3233.13	0.306184	0.0729176	4.19904	2.68046e-05	0.000297114	2807.59	3006.33	2801.94	2726.43	2885.51	3116.85	3437.23	3558.95	3473.73	3212.54	3449.23	4321.17
Gnl3l	16572.8	0.152922	0.0364333	4.19731	2.70109e-05	0.000299192	15702.2	16197.4	15743.9	15527.4	15405.6	15591.8	18255.4	16698.8	17477.9	17998.3	17631.7	16643.5
Arid4a	1004.94	0.252634	0.0602218	4.19507	2.72789e-05	0.00030195	945.949	943.904	910.379	905.284	881.662	914.541	1057.27	1024.7	992.243	1156.34	1147.79	1179.18
Epm2a	1450.93	-0.372577	0.088819	-4.19479	2.73123e-05	0.000302109	1591.93	1489.49	1784.79	1402.6	1741.53	1812.94	1305.21	1258.98	1378.21	1270.45	1026.76	1348.24
Tbc1d1	763.984	-0.341128	0.0813398	-4.19386	2.74243e-05	0.000303137	743.34	891.707	947.468	778.309	864.9	895.547	582.156	757.831	686.463	645.552	692.969	681.562
Cux1	3662.76	0.312701	0.0745795	4.19286	2.75462e-05	0.000304153	3182.55	3516.49	3181.83	2974.51	3048.1	3696.15	3996.45	4226.13	3627.94	3857.01	4027.03	4618.89
Bcl11b	5193.03	0.324465	0.0773865	4.19279	2.75545e-05	0.000304153	5109.97	4518.81	4308	4477.04	4973.17	4282.1	6211.48	5370.01	5059.03	6434.87	6217.2	5354.67
Adamts10	878.023	-0.409382	0.0976638	-4.19175	2.76817e-05	0.000305344	1138.03	759.349	1072.22	1019.33	1093.7	932.585	768.926	662.084	811.595	781.4	749.577	747.485
Gpr35	42.9608	-0.907563	0.21653	-4.19139	2.77249e-05	0.000305608	53.9415	60.2757	42.7091	57.609	69.5608	52.2323	26.2134	34.6321	36.1296	14.1282	35.1364	32.9617
Wdr5	2481.7	0.197268	0.0470963	4.1886	2.80677e-05	0.000309173	2197.13	2292.34	2442.29	2349.04	2337.41	2256.44	2547.07	2480.27	2765.24	2634.37	2726	2752.83
Crb1	263.878	0.512099	0.122303	4.18714	2.82493e-05	0.000310958	240.763	224.946	183.2	225.733	235.501	194.684	361.526	318.819	295.206	348.859	317.204	220.099
Cdc42bpg	114.376	0.725181	0.173232	4.18619	2.83681e-05	0.000312049	94.7265	73.9464	93.2857	78.7715	77.9416	99.7163	120.145	149.733	122.488	111.939	130.786	219.036
Vamp4	3094.1	0.340979	0.0815176	4.18289	2.87829e-05	0.000316393	2823.37	2691.28	2582.78	2828.72	2599.73	2854.73	3949.48	3254.4	3201.44	4097.19	3147.64	3098.4
Smarcad1	1821.4	0.290732	0.0695473	4.18035	2.9106e-05	0.000319502	1684.03	1682.75	1564.5	1751.78	1618.34	1528.98	2180.08	1788.64	1974.79	2130.1	1789.03	2163.77
Prkaa1	630.041	-0.329323	0.0787779	-4.18039	2.91005e-05	0.000319502	711.764	754.999	630.522	671.321	660.408	777.787	579.971	586.708	541.063	542.307	488.006	615.639
5031425E22Rik	339.396	0.438039	0.104832	4.17847	2.93479e-05	0.000321935	317.07	286.465	296.716	277.464	315.119	237.42	401.939	339.191	359.534	344.511	452.87	444.451
Zfp91	4862.34	0.190704	0.0456462	4.17787	2.94248e-05	0.000322556	4528.45	4697.77	4286.65	4691.02	4482.06	4558.46	5454.57	4948.31	5112.78	5501.32	4930.81	5155.84
Alkbh5	1627.37	-0.427385	0.102315	-4.17714	2.95202e-05	0.000323379	1438	2049.99	1917.41	1783.53	2066.71	1941.14	1229.84	1608.35	1372.05	1437.82	1511.84	1171.73
Gm14204	627.406	0.566723	0.13568	4.17689	2.95517e-05	0.0003235	682.82	443.057	418.1	538.468	503.687	451.097	1004.85	633.563	684.701	696.631	686.137	785.763
Rtn4rl1	1388.09	-0.277934	0.0665499	-4.17632	2.96264e-05	0.000324095	1494.57	1549.77	1660.04	1417.89	1509.38	1496.69	1111.88	1329.26	1276.87	1168.3	1247.34	1395.02
Wnt7b	2289.04	0.482518	0.115544	4.17607	2.96585e-05	0.000324223	1999.78	1649.19	2252.34	1796.46	2170.63	1592.61	2338.45	2362.11	2826.92	2284.43	2868.5	3327
Drp2	1618.96	-0.232694	0.0557721	-4.17222	3.01645e-05	0.000329528	1770.86	1777.2	1678.02	1601.3	1877.3	1787.3	1414.43	1553.35	1511.28	1462.82	1409.36	1584.29
Enkd1	266.367	-0.473699	0.113552	-4.17165	3.024e-05	0.00032969	340.752	254.152	368.647	310.383	305.9	282.055	207.523	229.183	229.115	241.267	249.859	177.568
5033430I15Rik	313.835	0.676899	0.162262	4.17164	3.02417e-05	0.00032969	284.179	232.403	224.785	259.828	227.12	222.225	435.798	343.265	309.305	397.764	570.967	258.377
Eml5	1704.93	-0.317228	0.0760407	-4.17182	3.02179e-05	0.00032969	1852.43	2100.95	1704.99	2001.03	1722.26	1966.79	1369.65	1630.76	1473.38	1505.2	1708.02	1423.73
Mad2l2	423.557	0.422221	0.101237	4.17062	3.03777e-05	0.00033093	347.33	316.913	401.241	331.546	410.66	364.677	543.928	411.51	491.716	437.975	461.654	563.538
Zfp706	7366.3	0.324545	0.0778196	4.17047	3.0397e-05	0.00033093	6976.87	6529.04	6344.55	5998.39	6914.17	6483.46	8563.04	7374.59	8330.09	7719.45	7318.14	9843.84
Mier3	867.671	0.365314	0.0876194	4.16933	3.055e-05	0.000332367	798.597	791.04	744.038	698.362	791.149	724.605	1079.12	913.675	901.479	1058.53	800.33	1111.13
A130010J15Rik	339.295	0.386716	0.0927705	4.16853	3.06575e-05	0.000333309	286.811	309.457	276.485	363.289	276.567	252.615	397.57	373.823	369.227	355.379	391.381	418.932
Flywch2	200.084	-0.529121	0.126967	-4.16738	3.08126e-05	0.000334766	257.866	200.09	223.661	271.585	260.643	206.08	186.77	161.956	161.262	180.407	173.73	116.961
Chtf8	2605.19	0.223724	0.0537178	4.1648	3.11621e-05	0.000338332	2320.8	2371.26	2519.84	2173.86	2535.2	2498.61	2720.73	2705.38	2977.61	2691.97	2853.86	2893.18
Plppr1	2152.11	0.359004	0.0862235	4.16364	3.13207e-05	0.000339821	1881.37	2012.09	1696	1768.24	1763.32	2189.96	2351.56	2324.42	2289.39	2480.05	2160.89	2908.07
Gprasp2	7899.42	0.284113	0.0682696	4.16164	3.15974e-05	0.000342589	7820.19	6547.06	7215.59	7045.93	7596.37	6523.34	9591.92	7699.52	8604.14	8985.56	8908.06	8255.3
Fem1c	1611.69	0.263291	0.0633186	4.15819	3.20781e-05	0.000347564	1402.48	1641.11	1361.07	1499.01	1377.81	1502.39	1763.94	1691.88	1723.65	1851.89	1637.75	1887.32
St3gal6	125.076	-0.897857	0.215967	-4.15737	3.21925e-05	0.000348329	113.145	192.012	124.756	211.625	144.15	190.885	60.0723	136.491	89.0023	66.294	104.433	68.0499
Prpf40b	2528.79	0.228972	0.0550751	4.15745	3.21823e-05	0.000348329	2335.27	2389.28	2193.9	2404.29	2338.25	2309.62	2596.22	2821.49	2626.01	2512.65	3017.83	2800.68
Plxdc2	1145.11	-0.502463	0.120921	-4.15531	3.24841e-05	0.000351245	1197.24	1645.46	1179	1355.58	1164.1	1510.94	837.736	1136.75	857.418	916.161	791.546	1149.4
Tmed4	1691.11	0.205202	0.0494427	4.1503	3.32035e-05	0.000358779	1544.57	1511.24	1581.36	1620.11	1488.43	1684.73	1831.66	1725.49	1853.19	1749.73	1897.37	1805.45
Tnc	532.889	1.38124	0.332841	4.14985	3.32688e-05	0.000359239	240.763	362.275	286.601	191.638	377.975	313.394	671.718	716.069	741.979	467.318	399.189	1625.75
Tagap1	876.016	0.224706	0.0541557	4.14927	3.33543e-05	0.000359918	853.854	832.674	806.978	740.687	802.044	809.126	1007.03	922.843	919.103	963.98	933.068	920.8
Serinc5	821.459	0.673924	0.162462	4.14818	3.35125e-05	0.000361135	731.499	600.271	686.718	480.859	636.104	662.876	1054	830.151	1025.73	848.781	730.057	1570.46
Acer3	561.661	-0.375194	0.0904472	-4.14821	3.35079e-05	0.000361135	632.825	603.999	633.893	710.119	687.227	538.468	511.161	486.886	489.072	566.216	467.51	412.552
Shroom2	5128.04	0.374263	0.0903196	4.14377	3.41648e-05	0.000367914	4520.56	4707.72	4120.31	3996.18	4684.87	4766.44	5998.5	5566.6	5691.74	5527.4	4773.68	7182.45
Tspan3	10123.6	0.234512	0.0566234	4.1416	3.44893e-05	0.000371158	10133.1	9042.59	8999.26	9104.57	9095.7	9443.61	12244.9	9968.94	10812.5	10633.1	11199.7	10805
Mef2a	4306.37	-0.378808	0.0914987	-4.14004	3.47247e-05	0.000373252	4887.62	5276.3	4294.52	4980.24	4560.84	5208.99	3717.93	3975.56	3422.62	3711.38	3070.53	4569.97
Srpk2	5856.35	-0.348968	0.0842918	-4.14	3.4731e-05	0.000373252	6108.54	7443.73	6070.32	6769.65	6024.97	6946.9	4602.63	5813.09	5058.15	5030.74	4554.07	5853.35
Pfdn2	1552.86	-0.32424	0.0783276	-4.13954	3.48007e-05	0.000373749	1643.24	1793.36	1628.57	1886.99	1736.5	1670.49	1307.39	1547.24	1394.08	1521.5	1368.37	1136.65
Ankrd37	146.35	-0.876966	0.211874	-4.1391	3.48675e-05	0.000374213	205.241	125.523	229.281	149.313	295.843	132.005	131.067	112.045	103.983	99.9844	75.1529	96.7584
Lss	3654.39	-0.297923	0.0719813	-4.1389	3.48979e-05	0.000374287	4074.55	3957.07	4155.15	3925.64	4527.32	3542.3	3207.86	2959	3448.18	3712.46	3191.56	3151.56
Zbtb39	698.471	0.371724	0.0898173	4.13867	3.49328e-05	0.000374408	568.359	679.81	555.219	599.604	536.372	711.31	707.761	827.095	800.139	775.966	730.057	889.965
Pals1	652.729	-0.363463	0.0878973	-4.13509	3.5482e-05	0.000380037	715.711	747.543	700.205	848.851	721.588	673.322	593.078	594.857	587.768	659.68	496.79	493.362
Ddx20	575.071	0.264493	0.0640086	4.13215	3.59382e-05	0.000384664	519.68	528.81	495.651	584.32	516.258	491.934	649.874	606.061	650.334	583.605	636.36	637.968
Pstpip2	72.0653	-0.774259	0.187424	-4.13106	3.61101e-05	0.000386028	78.9387	97.5596	80.9226	77.5958	96.3794	113.961	43.689	76.3943	57.2787	42.3847	62.4648	37.2148
Ibtk	1398.77	0.306923	0.0742969	4.13103	3.61142e-05	0.000386028	1070.94	1427.97	1202.6	1216.84	1291.48	1285.87	1408.97	1502.42	1640.81	1616.05	1479.63	1641.7
Cab39l	993.472	0.27409	0.0663599	4.13035	3.62204e-05	0.000386903	923.583	884.25	937.353	898.23	877.471	877.503	1165.4	999.237	1124.42	1186.77	1098.99	948.445
Slc35c1	741.955	0.305633	0.0740005	4.13015	3.62523e-05	0.000386984	620.985	753.135	637.265	603.131	630.237	731.253	775.479	888.211	830.982	793.355	798.378	841.054
Thoc2	1815.37	-0.397659	0.0963129	-4.12882	3.64627e-05	0.000388968	2287.91	1951.19	1959	2132.71	1970.33	2082.65	1696.22	1496.31	1307.72	1697.56	1304.93	1897.95
Spef1	625.655	0.283514	0.0686777	4.12818	3.65647e-05	0.000389794	531.521	556.773	595.68	529.062	598.39	573.606	649.874	685.511	684.701	620.555	761.29	720.903
Snrpb	2266.92	0.200959	0.0487262	4.12424	3.71961e-05	0.000396259	1998.47	2044.4	2214.13	2097.44	2214.21	2085.49	2320.98	2444.62	2285.86	2495.26	2563.01	2439.16
Mfsd1	860.339	0.258734	0.0627528	4.12306	3.73865e-05	0.000398021	769.652	840.752	727.179	851.202	760.978	749.297	974.264	924.88	986.075	930.29	953.564	855.94
Cnot6l	2378.09	0.38453	0.0932703	4.12274	3.74387e-05	0.00039831	2160.29	2161.85	1821.88	2032.77	2095.2	2103.54	2781.9	2499.62	2374.86	3296.23	2247.76	2961.23
Rabl3	229.531	-0.513064	0.124458	-4.12239	3.74957e-05	0.000398527	260.498	316.292	251.759	311.559	225.444	252.615	203.154	200.662	180.648	186.927	141.522	223.289
E130317F20Rik	106.437	-0.508828	0.123433	-4.12231	3.75093e-05	0.000398527	105.252	136.708	131.499	131.678	122.36	121.559	79.7324	102.878	94.2896	93.4637	78.081	79.7459
Tmem210	35.9917	0.930875	0.225877	4.12115	3.76979e-05	0.000399895	14.4721	24.8559	17.9828	34.0951	27.6567	28.4904	40.4123	45.8366	36.1296	57.5997	57.5847	46.7843
Phaf1	879.258	0.238196	0.0577996	4.12106	3.77136e-05	0.000399895	810.437	833.296	803.606	828.864	776.901	787.284	921.837	918.768	961.401	972.674	882.315	1053.71
Fndc10	563.205	0.381387	0.0925404	4.12131	3.76732e-05	0.000399895	569.674	437.465	477.668	465.575	507.039	481.487	667.349	546.983	631.828	604.254	765.194	603.943
Rtl4	57.3236	0.821728	0.199553	4.11785	3.82421e-05	0.000405228	38.1537	39.7695	42.7091	51.7305	40.2279	36.0878	85.1935	46.8551	65.2096	80.4222	60.5128	101.012
Mcrip2	444.306	-0.53358	0.129599	-4.11717	3.83551e-05	0.000406154	559.149	461.078	545.103	565.509	504.525	519.474	440.166	387.064	326.048	339.078	443.11	241.364
Gtf3c4	3601.46	0.240045	0.0583077	4.11686	3.84063e-05	0.000406426	2977.31	3683.03	3341.43	3215.52	3110.12	3480.57	3855.55	3906.29	4021.85	3698.34	3892.34	4035.15
Ddx17	13265.1	-0.19792	0.0481001	-4.11476	3.87591e-05	0.000409886	13961.6	14560	14204.2	15193.5	13599.5	13524.4	12177.2	12284.2	12225.9	12501.3	13385	11564.2
Gm13749	9.28988	2.04848	0.497992	4.11349	3.8973e-05	0.000411874	6.57823	3.10699	2.24785	7.05416	1.67616	1.89936	13.1067	12.2231	11.4557	8.6943	13.6642	29.7718
Scoc	6376.57	0.436552	0.10615	4.11259	3.91241e-05	0.000413197	6347.99	4840.7	5354.38	5794.99	5534.69	4644.88	8866.68	5910.88	6927.2	8462.81	6928.71	6904.94
Eif4ebp1	485.814	-0.774144	0.188247	-4.11238	3.91593e-05	0.000413293	544.677	651.847	637.265	659.564	704.826	480.538	318.93	420.678	358.653	419.5	468.486	164.808
Tspan9	2614.05	0.299693	0.0729161	4.11011	3.95464e-05	0.000417101	2468.15	2187.32	2450.16	2058.64	2542.74	2354.25	3095.36	2755.29	2759.07	2638.72	2802.13	3256.82
Dcp2	2076.05	-0.368058	0.0895544	-4.10989	3.95855e-05	0.000417237	2222.12	2743.47	2225.37	2244.4	2202.48	2395.09	1709.33	1961.8	1816.18	1748.64	1500.13	2143.57
Nfkbil1	217.299	-0.567366	0.138064	-4.10946	3.96586e-05	0.00041773	252.604	216.868	262.998	288.045	272.376	264.96	172.571	179.272	146.281	199.969	229.363	122.277
Dusp15	576.374	0.475336	0.115717	4.10773	3.99562e-05	0.000420586	567.043	408.259	505.766	513.778	448.374	454.896	754.727	519.481	704.087	556.435	721.273	762.371
Nupr1	46.5712	-1.03613	0.252255	-4.10746	4.00039e-05	0.000420809	46.0476	53.4403	79.7986	44.6764	65.3703	86.4208	25.1212	42.7808	30.8424	30.43	39.0405	14.8859
Aspdh	73.9231	0.692409	0.16858	4.10729	4.00323e-05	0.000420829	69.7292	49.0905	62.9398	49.3791	57.8276	51.2827	99.3924	70.2827	81.9526	99.9844	76.129	119.087
Pdia4	1804	-0.361217	0.0879732	-4.10598	4.02598e-05	0.000422941	1682.71	2256.3	1933.15	2300.83	2049.95	1946.84	1486.52	1620.58	1746.56	1714.95	1541.12	1368.44
Ccdc116	171.818	-0.6285	0.153098	-4.10522	4.0393e-05	0.00042406	189.453	169.642	229.281	218.679	274.891	170.942	148.543	142.603	169.192	128.241	116.145	104.201
Ldlrad3	905.78	0.390435	0.0951483	4.10343	4.07062e-05	0.000427066	649.929	912.835	758.649	846.5	740.026	792.032	878.148	1154.06	1009.87	1072.66	1125.34	929.306
Nup50	1808.52	0.258646	0.0630475	4.10239	4.08897e-05	0.000428707	1469.58	1842.45	1539.78	1708.28	1604.09	1709.42	1885.18	2031.07	1964.22	2089.89	1966.66	1891.57
Pola1	453.01	0.416156	0.10147	4.10127	4.10887e-05	0.000430455	411.797	383.403	403.489	410.317	383.841	337.136	607.277	458.366	494.359	585.778	544.615	415.742
A830018L16Rik	6517.24	0.239571	0.0584157	4.10115	4.11105e-05	0.000430455	5863.83	5996.5	6032.1	6245.29	5768.51	5958.29	7314.63	6625.93	7087.58	7931.37	7106.35	6276.54
Igf2bp1	27.9384	-1.28939	0.314438	-4.10061	4.1206e-05	0.00043117	21.0503	26.7201	53.9484	36.4465	62.8561	37.0375	10.9222	10.1859	21.1491	19.5622	20.4963	14.8859
Trp53rkb	176.712	0.438802	0.10706	4.09865	4.15558e-05	0.000434544	180.243	143.543	137.119	138.732	159.235	142.452	216.26	192.514	177.123	208.663	233.267	191.39
Cyb561	2254.67	0.300805	0.0734137	4.0974	4.17818e-05	0.00043662	1878.74	2071.12	2137.7	1868.18	2240.19	1924.05	2373.4	2522.03	2651.56	2673.5	2593.26	2122.31
Sdcbp	4984.46	-0.364838	0.089049	-4.09704	4.18466e-05	0.000437009	5479.66	5434.75	5854.52	6126.54	5250.58	5523.33	4818.89	4120.2	4374.33	4990.53	4500.39	3339.76
Ap3s1	2739.89	0.483885	0.118147	4.09562	4.21042e-05	0.000439411	2627.34	2128.91	1985.97	2483.07	2173.14	2310.57	3900.33	2631.02	2592.52	3977.64	2925.11	3143.05
Mllt6	3000.23	0.35089	0.0856784	4.09543	4.21381e-05	0.000439476	2891.79	2324.03	2936.81	2448.97	2687.73	2537.54	3364.05	3159.67	3255.19	2914.76	3473.63	4008.56
Ankrd10	2062.14	0.323806	0.0790813	4.09459	4.22908e-05	0.000440778	2037.93	1634.9	1821.88	1697.7	1920.88	1879.41	2536.15	1987.27	2307.89	2273.56	2111.11	2536.98
Zfp956	938.06	-0.28775	0.070291	-4.09369	4.24565e-05	0.000442216	1119.61	896.678	1087.96	975.826	1086.99	1025.65	878.148	789.407	903.241	859.649	840.347	793.206
Tmem63c	799.76	-0.330638	0.0808042	-4.09184	4.27957e-05	0.000445457	838.066	947.633	901.387	846.5	916.023	894.598	599.631	758.85	743.742	650.985	672.472	827.231
Tti1	932.126	0.222287	0.0543448	4.0903	4.30812e-05	0.000448048	869.641	870.579	889.024	785.363	886.69	858.51	1067.1	972.754	997.531	973.761	967.228	1047.33
9930104L06Rik	608.466	-0.328591	0.0803363	-4.0902	4.31011e-05	0.000448048	682.82	742.571	639.513	706.592	589.171	703.712	540.651	576.522	531.37	546.654	582.679	459.337
Lrrc58	4278.55	0.436375	0.106728	4.08867	4.33851e-05	0.000450706	3393.05	4444.86	2928.95	3571.76	3493.96	3980.1	4821.08	5102.12	4346.13	5450.24	4120.72	5689.61
Macroh2a2	2307.14	0.212862	0.0520635	4.0885	4.34168e-05	0.00045074	2153.71	2125.8	2121.97	1979.87	2153.87	2285.88	2441.12	2386.56	2507.93	2487.66	2339.5	2701.79
Rpia	317.882	0.330781	0.0809206	4.08772	4.35628e-05	0.000451961	313.124	249.181	297.84	303.329	273.215	259.262	370.264	346.321	365.702	355.379	339.652	341.313
Rab40c	2337.76	0.191874	0.0469606	4.08584	4.39172e-05	0.00045534	2166.87	2092.87	2364.74	2083.33	2196.61	2194.71	2461.87	2439.52	2549.34	2430.06	2636.21	2437.04
Tsc22d3	1451.69	-0.431288	0.105587	-4.08468	4.41378e-05	0.000457329	1773.49	1576.49	1640.93	1845.84	1671.97	1495.74	1433	1182.58	1346.49	1322.62	1257.1	874.016
Kcnq4	487.196	-0.332129	0.0813199	-4.08422	4.42243e-05	0.000457926	549.94	487.798	620.406	520.832	503.687	579.304	374.633	460.403	443.249	429.281	432.373	444.451
Tlk1	2723.6	0.246844	0.0604514	4.08335	4.4392e-05	0.000459363	2391.84	2837.93	2210.76	2491.3	2437.98	2568.88	2891.12	3039.47	2868.34	3025.62	3001.24	2918.7
Rttn	129.612	0.495442	0.121339	4.08311	4.44365e-05	0.000459524	99.989	113.095	137.119	94.0555	108.112	92.1189	147.45	144.64	146.281	156.497	140.546	175.441
Rrm2b	947.975	-0.461407	0.113055	-4.08128	4.47881e-05	0.000462859	1143.3	1083.72	1105.94	1095.75	1120.51	1039.9	814.799	851.541	771.941	816.177	535.831	996.293
Pip4k2c	1375.89	0.329201	0.0806878	4.07993	4.50494e-05	0.000465256	1253.81	1281.95	1156.52	1294.44	1034.19	1298.21	1584.82	1515.66	1573.84	1272.63	1670.93	1573.65
Hmgcll1	954.699	0.307062	0.07527	4.07947	4.51379e-05	0.000465868	855.169	875.551	844.067	828.864	960.441	754.045	1146.84	980.902	1064.5	1171.56	987.724	986.723
Uba3	3032.78	-0.355789	0.087239	-4.07832	4.53623e-05	0.000467576	3661.44	2959.1	3620.16	3603.5	3601.24	2986.74	3057.14	2352.94	2781.98	2864.77	2432.22	2472.12
Klf16	1224.08	0.278575	0.0683044	4.07843	4.53402e-05	0.000467576	1163.03	1039.6	1168.88	1046.37	1141.47	1081.68	1325.96	1288.52	1357.95	1161.78	1459.14	1454.57
Hspa4	12837	-0.208187	0.0510766	-4.07596	4.58239e-05	0.000472028	13010.4	14564.3	13193.7	14786.7	13742.9	13268.9	11023.8	12326	12374	11938.4	11531.6	12283
Pard3	644.853	-0.306236	0.0751411	-4.07548	4.59205e-05	0.000472716	711.764	777.37	624.902	731.282	652.865	776.837	582.156	617.266	536.657	605.34	546.567	575.234
Cmbl	84.473	0.853321	0.209416	4.07476	4.60625e-05	0.000473871	59.204	57.7901	68.5594	48.2034	45.2564	82.6221	119.052	72.3199	154.212	86.943	89.7931	129.72
Csk	2795.84	-0.173114	0.0425129	-4.07203	4.66053e-05	0.000479145	2987.83	2928.65	3044.71	2825.19	2978.54	3016.18	2516.49	2792.97	2650.68	2563.73	2545.44	2699.67
Ptcd3	1704.75	0.286782	0.0704695	4.06959	4.70969e-05	0.000483885	1651.13	1457.18	1583.61	1575.43	1556.32	1395.08	2107.99	1627.71	1890.2	1961.65	1873.94	1776.74
Ccnd1	374.627	-0.533621	0.131173	-4.06806	4.74062e-05	0.000486748	505.208	420.065	398.993	383.276	444.183	506.179	347.327	283.168	247.62	277.131	264.499	417.869
N4bp2	602.691	-0.492969	0.121191	-4.06771	4.74767e-05	0.000487157	698.608	632.584	753.029	745.39	830.539	567.908	522.083	454.291	507.577	519.484	377.717	623.082
Wdr1	8295.6	0.212005	0.0521356	4.06641	4.77423e-05	0.000489567	7488.65	8267.09	7448.25	7085.91	7957.58	7867.14	8612.19	9185.65	8908.16	8576.92	8544.01	9605.67
Fibp	868.215	0.280313	0.0689383	4.06614	4.77989e-05	0.00048983	872.273	775.505	781.127	723.052	729.131	826.221	988.463	974.791	896.191	857.475	1026.76	967.584
Zfp341	537.144	0.299854	0.0737725	4.06458	4.81192e-05	0.000492795	460.476	494.012	508.014	473.805	439.155	513.776	531.913	629.489	612.441	552.088	578.775	651.79
Wasf3	5758.01	0.218672	0.0538597	4.06003	4.90671e-05	0.000502179	5052.08	5555.92	5156.57	5267.11	5215.38	5681.93	6274.83	6330.54	5989.59	5823.01	5904.87	6844.33
E2f5	371.121	0.63998	0.157707	4.05804	4.94859e-05	0.000506139	364.434	235.51	283.229	313.91	315.119	230.772	636.767	339.191	449.417	503.182	364.053	417.869
Zbtb4	3882.68	-0.286513	0.070612	-4.05756	4.95871e-05	0.000506848	4007.46	4444.24	4277.66	4621.65	4147.66	4103.56	3142.33	3921.57	3469.33	3385.34	3894.29	3177.08
Fhdc1	138.563	-0.494073	0.1218	-4.05642	4.98307e-05	0.000508911	149.984	183.313	160.721	158.719	182.702	133.905	117.96	121.212	93.4083	129.328	110.289	121.214
Tnip2	286.97	-0.48683	0.120018	-4.05631	4.98531e-05	0.000508911	356.54	324.37	303.46	357.411	305.9	363.727	207.523	292.335	231.758	194.535	297.684	208.403
Swsap1	495.591	0.298175	0.0735278	4.05526	5.00782e-05	0.000510882	465.738	458.592	407.985	470.278	444.183	421.657	572.326	499.109	587.768	544.48	582.679	492.298
Zc3h7a	1197.97	-0.331851	0.0818412	-4.05482	5.01727e-05	0.000511517	1310.38	1339.74	1416.14	1409.66	1434.8	1101.63	1035.43	1104.15	1129.71	1071.57	1128.27	894.218
Ikbip	364.859	-0.423912	0.104598	-4.05277	5.06153e-05	0.000515367	434.163	334.934	449.57	429.128	484.411	377.972	365.895	288.261	302.255	327.123	299.636	284.959
Hif1a	3447.83	0.277284	0.0684177	4.05281	5.06057e-05	0.000515367	3278.59	3235	2873.87	3034.47	3140.29	3139.64	4149.36	3510.06	3519.56	4201.52	3381.88	3909.68
Khdrbs1	5504.57	0.280402	0.069224	4.05065	5.10756e-05	0.000519722	5195.48	5230.93	4381.06	4693.37	5047.76	5275.47	5987.57	5964.86	5800.13	5987.11	5521.3	6969.8
Nxt2	551.334	0.587745	0.145114	4.05023	5.11671e-05	0.000520319	531.521	374.703	432.711	466.75	471.002	368.475	896.716	485.868	572.787	778.14	669.544	567.791
Cdk19	1981.27	0.47915	0.11831	4.04994	5.12307e-05	0.000520632	1540.62	1759.8	1694.88	1375.56	1541.23	2017.12	2158.24	2250.07	2325.52	2114.89	1903.22	3094.14
Znrf2	4074.78	0.380744	0.0940539	4.04815	5.1624e-05	0.000524293	3749.59	3301.49	3630.28	3669.34	3693.42	3198.52	4912.83	3909.35	4572.6	4606.89	3905.02	5748.09
Exoc3l2	26.7359	-1.25986	0.311265	-4.04756	5.1755e-05	0.000525288	32.8911	31.6913	37.0895	44.6764	28.4948	51.2827	20.7523	27.5019	10.5745	19.5622	7.8081	8.50623
Naa40	1599.72	0.238671	0.0589991	4.04533	5.22491e-05	0.000529626	1472.21	1558.47	1408.28	1576.61	1356.85	1434.96	1650.35	1722.44	1780.05	1653	1901.27	1682.11
Dync1i1	6324.55	0.316923	0.0783422	4.04536	5.22429e-05	0.000529626	4841.57	6399.78	5815.18	5308.26	5806.23	5619.25	5912.21	7542.66	7329.03	7044.55	7358.16	6917.7
Bnip3l	6006.69	0.313827	0.0775846	4.04497	5.23305e-05	0.000530113	5778.31	4762.4	5581.41	5136.61	5305.89	5573.67	7562.56	5797.82	6310.35	7378.2	6163.52	6729.49
Tacr3	154.675	-0.790126	0.195345	-4.04477	5.2375e-05	0.000530226	219.713	195.119	164.093	261.004	175.159	161.445	114.684	127.324	89.8835	145.629	142.498	59.5436
Grhpr	301.28	-0.607022	0.15018	-4.04196	5.30072e-05	0.000536284	281.548	338.662	407.985	282.167	391.384	479.588	204.246	293.354	252.026	246.701	182.514	255.187
Mir100hg	988.295	-0.255141	0.0631271	-4.0417	5.30657e-05	0.000536534	1078.83	1077.51	973.319	1128.67	1116.32	1075.99	875.964	829.132	852.131	969.414	900.859	981.407
Hnrnpll	2348.84	0.204476	0.0506057	4.04058	5.33203e-05	0.000538765	2222.12	2199.75	2153.44	2291.43	2070.06	2160.52	2575.47	2353.96	2420.69	2733.27	2574.72	2430.66
2810029C07Rik	163.707	0.533351	0.132075	4.03824	5.38535e-05	0.000543807	156.562	123.658	131.499	122.272	148.34	121.559	230.459	140.565	196.51	174.973	223.507	194.58
Tmed2	1255.92	0.205146	0.0508082	4.03765	5.39903e-05	0.000544638	1195.92	1137.78	1130.67	1200.38	1208.51	1130.12	1370.74	1258.98	1423.16	1395.43	1326.4	1292.95
Ets1	54.1715	-0.801379	0.19848	-4.03758	5.40044e-05	0.000544638	78.9387	65.2469	70.8072	64.6632	65.3703	68.3769	38.2279	33.6135	44.9417	34.7772	23.4243	61.6702
Ilrun	6232.27	0.207272	0.0513392	4.0373	5.40694e-05	0.000544948	5538.87	5995.88	5783.71	5536.34	5687.22	6166.27	6124.1	7032.35	6655.78	6392.48	7045.83	6828.38
Col6a3	127.711	0.626114	0.155136	4.03589	5.43951e-05	0.000547884	77.6231	105.016	101.153	84.65	115.655	115.861	126.698	182.328	146.281	153.237	122.002	202.023
Commd10	708.116	0.30496	0.0755697	4.03548	5.44912e-05	0.000548504	626.247	642.526	621.53	643.105	660.408	605.895	813.707	730.329	803.664	783.573	663.688	902.724
Fhip1a	86.8987	0.587678	0.14565	4.03488	5.46307e-05	0.000549559	57.8884	56.5473	84.2943	84.65	72.075	62.6788	107.038	111.026	96.9332	119.547	97.6012	92.5053
Srpk1	2934.35	0.185091	0.0458845	4.03384	5.48731e-05	0.000551649	2598.4	2885.78	2653.59	2715.85	2736.34	2880.38	3049.49	3098.55	3160.02	3127.77	2987.57	3318.49
Uap1l1	313.978	-0.526781	0.130708	-4.0302	5.57287e-05	0.000559895	331.543	385.889	377.639	373.871	334.394	420.708	220.629	297.428	266.126	295.606	293.78	170.125
Ckb	11695.1	-0.295048	0.0732435	-4.02831	5.61787e-05	0.00056406	13585.4	12808.3	13058.9	12349.5	12101.9	13418	9824.56	12177.2	9298.54	10073.4	11704.3	9940.6
Thoc3	1512.34	0.304539	0.0756437	4.02597	5.67409e-05	0.000568985	1360.38	1378.26	1234.07	1377.91	1296.51	1472	1728.99	1623.63	1701.62	1437.82	1588.95	1947.93
Tbc1d4	423.13	-0.622566	0.154636	-4.02602	5.6728e-05	0.000568985	401.272	548.695	505.766	502.021	515.42	603.996	265.411	466.514	344.553	399.938	287.924	236.048
Sntb1	48.8676	-0.786309	0.195348	-4.02516	5.69362e-05	0.000570583	64.4666	65.8683	47.2048	70.5416	53.6372	69.3266	21.8445	38.7064	34.3672	44.5583	31.2324	44.6577
Myo7a	950.356	-0.458236	0.113893	-4.02339	5.73654e-05	0.000574522	963.052	1232.23	1122.8	965.245	1059.33	1255.48	677.179	999.237	850.368	750.97	649.048	879.332
Mpnd	2550.96	-0.170012	0.0422908	-4.02007	5.81803e-05	0.000582316	2852.32	2596.2	2735.63	2622.97	2724.6	2679.04	2445.49	2478.23	2306.13	2414.84	2449.79	2306.25
Oser1	175.604	0.429047	0.106751	4.01913	5.84139e-05	0.000584162	157.877	151.621	146.11	126.975	165.102	149.1	235.92	169.086	206.203	204.316	208.867	186.074
Ciart	111.306	-0.684223	0.170246	-4.01903	5.84383e-05	0.000584162	113.145	121.173	176.456	144.61	172.645	95.9176	70.9946	72.3199	97.8144	83.6826	97.6012	89.3155
Grb10	2205.31	-0.217547	0.0541482	-4.01762	5.8789e-05	0.000587299	2260.28	2493.05	2279.32	2406.65	2279.58	2504.3	2035.91	2082	2052.34	2035.55	1847.59	2187.17
Prxl2b	789.632	-0.36775	0.0916165	-4.01402	5.9693e-05	0.000595703	949.896	804.711	919.37	912.338	986.422	768.29	726.329	692.641	677.651	640.118	813.018	584.804
Sspn	126.062	-0.579273	0.144314	-4.01397	5.97053e-05	0.000595703	149.984	151.621	165.217	125.799	148.34	165.244	99.3924	111.026	120.726	85.8562	68.3209	121.214
Id3	158.035	1.59994	0.399261	4.00724	6.14313e-05	0.000612539	151.299	52.8189	66.3115	56.4333	76.2654	68.3769	305.823	157.881	206.203	108.679	156.162	490.172
Nap1l1	6685.23	0.230149	0.0574653	4.00501	6.20147e-05	0.000617969	6644.01	5963.56	5914.09	6085.39	5931.94	6381.84	7704.55	6481.29	6898.12	7542.3	7037.05	7638.6
Mllt11	21086.6	0.143371	0.0358362	4.00073	6.31481e-05	0.000628868	19857	21133.1	18830.2	19875.1	20221.2	20310.8	21916.6	22637.1	21749.2	22441.1	21818.8	22249.1
Habp4	3690.74	-0.206059	0.0515191	-3.99966	6.34347e-05	0.000631326	4132.44	3717.21	3862.93	3877.44	4161.07	3975.36	3519.15	3306.34	3551.28	3171.24	3341.87	3672.57
Hrk	1188.47	0.567487	0.141896	3.99931	6.35286e-05	0.000631865	1048.57	780.477	1156.52	911.163	1042.57	809.126	1462.49	1061.37	1466.33	1147.65	1421.07	1954.31
Gpr88	2571.92	-0.461373	0.115384	-3.99859	6.37211e-05	0.000633383	3202.28	3132.47	2208.51	3154.39	2754.77	3424.54	2476.07	2250.07	1816.18	2427.88	2237.02	1778.87
Tmem33	3414.46	0.363622	0.0909449	3.99826	6.38085e-05	0.000633855	3153.6	3093.32	2753.61	3008.6	2889.7	3018.08	4447.54	3462.19	3513.39	4416.7	3112.5	4104.26
Eif4g2	58180	0.216925	0.0542604	3.99785	6.39216e-05	0.000634582	50947	59191.9	50892.4	53946.7	54109	53789.8	61458.4	62214.5	63139.6	65180.1	56765.8	66525.1
Cyb5r4	1973.3	0.433241	0.108433	3.99546	6.45675e-05	0.000640594	1797.17	1580.22	1577.99	1999.86	1589.84	1532.78	2775.34	1944.49	2118.43	2237.69	2646.95	1878.81
Mt3	1153.56	-0.347772	0.0870974	-3.99291	6.52674e-05	0.000647133	1526.15	1229.75	1207.09	1115.73	1276.4	1396.98	1091.13	1002.29	939.371	963.98	936.972	1156.85
5031439G07Rik	11765.7	0.224784	0.0563373	3.98997	6.60809e-05	0.00065479	10513.3	11015.5	11349.4	10805.8	11074.4	10346.8	11573.2	12266.9	12801.3	12001.4	13242.5	14198
Eif4ebp2	883.53	0.31762	0.0796424	3.98807	6.66129e-05	0.00065965	676.242	883.007	750.781	801.823	726.617	876.554	950.235	1025.72	954.351	886.818	1034.57	1035.63
Alkbh7	417.201	-0.356458	0.0894586	-3.98462	6.75895e-05	0.000668904	485.473	419.444	484.411	466.75	535.534	419.758	418.322	361.6	340.147	391.243	356.244	327.49
Appbp2	4641.34	-0.412063	0.103442	-3.98351	6.79045e-05	0.000671603	4612.65	6420.91	4705.87	5394.08	4859.2	5801.59	3548.64	4683.48	3807.71	4180.87	3354.55	4326.48
Htra2	899.646	-0.315042	0.079098	-3.98294	6.80691e-05	0.000672813	1095.93	947.011	1026.14	1056.95	941.165	922.138	848.658	791.445	778.99	734.668	935.996	716.65
Alg10b	3338.13	0.253595	0.0636999	3.98109	6.85998e-05	0.000677636	2897.05	3427.01	2944.68	2920.42	3041.4	3034.22	3669.87	3653.68	3442.89	3622.26	3324.3	4079.8
Rundc3b	3148.28	0.23364	0.058693	3.98072	6.87065e-05	0.000678268	2912.84	2889.5	2891.86	2674.7	3118.5	2872.78	3540.99	3284.95	3483.43	3425.55	3014.9	3669.38
Wdr77	1467.7	0.298667	0.075032	3.98053	6.87611e-05	0.000678386	1363.01	1414.92	1203.72	1245.06	1316.63	1351.39	1703.87	1580.85	1606.45	1453.03	1477.68	1895.83
Taf1b	766.011	-0.324457	0.0815171	-3.98023	6.88482e-05	0.000678823	870.957	771.777	891.272	892.352	947.87	738.85	666.257	642.73	731.405	762.925	632.456	643.284
Gsk3a	4947.31	0.154109	0.0387301	3.97905	6.91922e-05	0.000681793	4673.17	4718.9	4736.22	4834.45	4692.42	4448.3	5112.7	5028.78	5392.13	5072.04	5443.22	5215.39
Kifbp	3563.49	-0.187324	0.0470997	-3.97718	6.97364e-05	0.000686728	3950.88	3712.86	3594.31	3878.61	3829.19	3803.46	3407.74	3270.69	3472.85	3344.04	3037.35	3459.91
Slc7a1	4952.4	-0.542431	0.136391	-3.97703	6.97804e-05	0.000686736	4566.6	7517.68	5317.29	6110.08	5465.13	6256.48	3097.55	5315	3738.1	4209.13	4431.1	3404.62
Clec2l	2764.08	-0.368543	0.0926866	-3.97623	7.00155e-05	0.000688623	3654.86	2557.06	3093.04	3096.78	3421.05	2871.83	2853.98	2243.95	2410.99	2456.14	2295.58	2213.75
Tab2	2472.12	-0.28832	0.0725241	-3.9755	7.0231e-05	0.000690315	2435.26	3120.66	2526.58	2773.46	2598.05	2850.94	2058.84	2420.17	2306.13	2296.38	2053.53	2225.44
Sema3b	43.4878	0.817512	0.205667	3.97493	7.03998e-05	0.000691546	30.2598	37.2839	31.4699	30.568	33.5233	24.6917	57.8879	42.7808	55.5163	52.1658	44.8966	80.8092
Gmpr2	834.821	-0.277621	0.0699111	-3.97105	7.15563e-05	0.000702472	920.952	847.588	937.353	982.88	957.089	847.114	792.955	751.72	825.694	775.966	707.609	670.929
Slc38a9	651.405	0.248601	0.062606	3.97088	7.16091e-05	0.000702556	548.624	631.341	582.193	570.212	586.657	647.681	667.349	691.623	701.444	749.883	711.513	728.346
Fhip2b	1173.33	0.31003	0.0780969	3.96981	7.19294e-05	0.000705264	988.05	1186.87	982.31	1042.84	1007.37	1074.09	1210.18	1445.38	1232.81	1211.77	1217.09	1481.15
Shld1	267.329	0.46869	0.118085	3.96908	7.215e-05	0.000706805	230.238	188.284	234.9	192.814	289.976	209.879	332.036	254.648	321.642	299.953	336.724	316.857
Pgk1	10266.1	-0.396949	0.100012	-3.969	7.21756e-05	0.000706805	11165.9	10407.8	12829.6	9845.26	13674.1	12094.2	9176.87	9539.1	9549.68	9281.16	6844.77	8784.81
Slc9a6	6239.8	-0.23585	0.059431	-3.96846	7.2338e-05	0.000707958	7232.1	6710.48	6560.35	6680.29	6830.36	6478.71	6035.63	5683.73	5729.63	6257.72	4958.14	5720.44
Lix1	1136.73	0.297748	0.075132	3.963	7.40153e-05	0.000723928	1028.83	1006.67	1027.27	1158.06	983.908	917.39	1295.38	1059.33	1338.56	1254.15	1234.66	1336.54
Hsdl1	4122.41	-0.187532	0.0473476	-3.96074	7.47179e-05	0.00073035	4507.4	4141	4586.74	4236.02	4667.28	4205.18	3769.27	3687.3	4005.1	3995.03	3826.94	3841.63
C9orf72	2263.4	0.251349	0.0634667	3.96033	7.48462e-05	0.000731154	1853.74	2204.72	2029.81	2175.03	2160.57	1970.58	2535.05	2411	2487.66	2722.4	2273.13	2337.09
Parg	1615.07	0.216181	0.054598	3.9595	7.51064e-05	0.000733245	1364.32	1623.71	1471.22	1496.66	1419.71	1583.11	1718.07	1748.92	1783.57	1781.24	1659.22	1731.02
Dixdc1	2064.78	0.314645	0.0794938	3.95811	7.55451e-05	0.000737075	1826.12	1994.07	1700.5	1596.59	1790.98	2130.13	2170.25	2360.07	2248.85	2288.77	2092.57	2578.45
Tafa5	2680.93	-0.293931	0.0742954	-3.95624	7.61377e-05	0.000742401	3220.7	2888.26	2637.85	3294.29	2754.77	2925.01	2662.84	2409.98	2218.89	2421.36	2564.96	2172.28
Sez6	5056.86	0.465712	0.11777	3.95441	7.67244e-05	0.00074725	4728.43	3826.57	4459.73	3783.38	4790.47	3898.43	5539.76	4913.68	5540.17	5297	5705.77	8198.95
Cnrip1	4833.89	-0.241322	0.0610263	-3.95439	7.67291e-05	0.00074725	5066.55	5157.61	5419.56	5437.58	4993.29	5350.49	4335.04	4469.57	4740.03	4159.13	3943.09	4934.68
Sertm1	1718.38	-0.423407	0.107088	-3.95383	7.69102e-05	0.000748555	1616.93	2118.97	1829.75	2282.02	1752.43	2210.85	1298.65	1724.47	1421.39	1359.57	1312.74	1692.74
Gtf2ird2	647.863	0.25137	0.0635811	3.95354	7.70038e-05	0.000749007	585.462	573.551	575.449	623.118	569.895	622.989	703.393	746.627	638.878	666.2	744.697	724.093
Cipc	2405.25	0.289737	0.0733325	3.951	7.7825e-05	0.000756532	2064.25	2390.52	1987.1	1919.91	2260.31	2358.05	2502.29	2639.17	2638.34	2640.89	2472.24	2989.94
Oaz1	4430.68	0.149018	0.0377582	3.94664	7.92551e-05	0.000769962	4202.17	4054	4324.86	4027.93	4301.87	4303	4776.3	4692.64	4608.73	4578.63	4796.12	4501.92
Minar1	1799.71	-0.728645	0.184717	-3.94465	7.99169e-05	0.000775917	1572.2	2872.73	1962.37	2323.17	2012.23	2724.63	976.449	2042.27	1328.87	1534.54	1340.06	906.977
Gask1a	67.7556	0.774477	0.196386	3.94364	8.02538e-05	0.000778712	57.8884	52.1975	47.2048	68.1902	42.7421	33.2388	90.6546	84.543	83.715	73.9015	117.121	61.6702
Mettl21a	320.975	0.420592	0.106657	3.9434	8.03329e-05	0.000779003	292.073	260.366	327.062	289.221	217.901	264.011	406.307	324.93	381.564	407.545	354.292	326.427
Timmdc1	819.128	-0.308263	0.0781836	-3.9428	8.0535e-05	0.000780338	976.209	852.559	955.336	901.757	931.108	823.372	822.445	684.493	766.653	789.007	693.945	632.651
Pcdhgc4	2931.34	0.399198	0.10125	3.9427	8.05688e-05	0.000780338	2791.8	2488.7	2579.41	2119.78	2606.43	2584.08	3391.36	3097.53	3446.42	2912.59	2865.57	4292.46
Slc35a5	2254.5	0.284724	0.0722328	3.94176	8.08857e-05	0.00078293	2041.88	1920.12	2142.2	2071.57	2135.43	1886.06	2757.87	2219.51	2428.62	2801.74	2291.68	2357.29
Iglon5	3279.94	0.21288	0.0540124	3.94132	8.10358e-05	0.000783165	3033.88	3049.2	3009.87	2872.22	2931.61	3332.42	3407.74	3592.57	3411.17	3598.35	3823.04	3297.23
Poc1b	207.281	0.427589	0.108486	3.94141	8.10031e-05	0.000783165	167.087	185.177	177.58	171.651	199.463	157.647	238.105	223.071	255.551	282.565	191.298	238.175
Slc20a2	812.029	0.229577	0.0582497	3.94125	8.10579e-05	0.000783165	826.225	763.077	742.914	706.592	708.179	739.8	921.837	848.486	833.625	857.475	900.859	895.281
Tdp2	734.597	0.365083	0.0927039	3.93816	8.21084e-05	0.000792833	722.289	571.065	638.389	735.984	590.847	599.247	963.342	738.478	801.902	881.384	836.442	735.789
Dock2	13.4966	1.72605	0.438395	3.9372	8.24376e-05	0.000794562	11.8408	6.21399	5.61962	3.52708	4.19041	6.64775	25.1212	17.316	13.2182	32.6036	29.2804	6.37968
Abhd5	1183.44	0.31628	0.0803302	3.93725	8.24192e-05	0.000794562	1010.42	1105.47	1076.72	1079.29	1059.33	992.414	1386.03	1277.31	1280.4	1518.24	1357.63	1057.96
Ston1	28.2989	-1.03267	0.262272	-3.93742	8.23626e-05	0.000794562	32.8911	42.8765	35.9656	32.9194	46.9326	36.0878	19.66	25.4648	24.6739	13.0414	7.8081	21.2656
Acot8	326.849	-0.405572	0.103028	-3.93652	8.26707e-05	0.000796326	417.06	352.954	391.126	369.168	381.327	324.79	305.823	283.168	238.808	232.572	330.868	294.528
Grk6	3345.77	0.147397	0.0374669	3.93405	8.35279e-05	0.000804095	3173.34	3213.87	3143.62	3128.52	3256.78	3131.09	3332.38	3496.82	3541.59	3701.6	3528.28	3501.38
C530005A16Rik	125.058	0.550116	0.139862	3.93327	8.37991e-05	0.000806217	85.5169	89.4814	115.764	104.637	109.789	104.465	183.494	126.305	174.48	128.241	155.186	123.34
Npas3	561.216	0.419974	0.106837	3.93099	8.45952e-05	0.000812401	495.998	488.419	490.031	531.414	372.108	504.28	683.733	584.671	611.56	554.261	621.72	796.396
Fgf1	109.889	-0.951531	0.242057	-3.93102	8.45867e-05	0.000812401	142.09	174.613	129.251	154.016	145.826	123.458	54.6112	88.6173	87.2399	28.2565	67.3448	123.34
Sars	8047.16	-0.322245	0.0819703	-3.93124	8.45091e-05	0.000812401	8499.07	9240.82	8566.55	9478.44	8704.31	9163.45	6840.6	8004.08	7082.29	7652.07	7745.63	5588.6
Senp1	502.399	0.354687	0.0902887	3.92837	8.55244e-05	0.000820828	431.532	490.905	427.091	423.25	445.021	425.456	490.409	556.15	586.886	499.922	563.159	689.005
Mpc2	1818.07	-0.386299	0.0983832	-3.92648	8.61986e-05	0.000826799	2101.09	1818.83	2226.49	2350.21	2048.27	1818.64	1726.81	1410.75	1645.22	1639.96	1781.22	1249.35
Zfp281	1862.14	0.307743	0.0784223	3.92418	8.70247e-05	0.000834218	1707.71	1703.25	1671.28	1668.31	1526.98	1707.52	2246.71	1877.26	1896.37	1970.34	1892.49	2477.44
Ehd4	238.058	-0.616376	0.157331	-3.91771	8.93951e-05	0.000856425	209.188	316.292	303.46	289.221	290.814	319.092	157.28	250.573	198.272	204.316	199.106	119.087
Ubap1	1682.65	0.178969	0.0457203	3.91442	9.06203e-05	0.000867639	1541.94	1598.24	1585.86	1655.38	1543.75	1547.03	1762.85	1833.46	1821.46	1775.81	1865.16	1660.84
Gpr155	1265.24	0.273643	0.0699498	3.91199	9.1537e-05	0.000875888	1178.82	1181.9	1089.08	1095.75	1139.79	1185.2	1411.15	1285.46	1294.5	1478.03	1249.3	1593.86
Rilpl2	613.022	-0.324538	0.0829648	-3.91175	9.1628e-05	0.000876231	692.029	601.514	733.923	645.456	707.341	712.259	563.588	581.615	547.232	555.348	576.823	439.134
Smchd1	2121.52	0.243029	0.0621345	3.91135	9.17835e-05	0.000877189	1878.74	2077.96	1963.5	1834.08	2039.05	1860.42	2257.63	2177.75	2306.13	2340.94	2116.97	2605.03
Cyp4f13	72.163	-0.682505	0.174839	-3.90362	9.47638e-05	0.000904584	86.8326	83.2674	83.1704	104.637	62.018	114.911	42.5968	58.0596	64.3284	57.5997	58.5607	49.9741
Tead1	565.549	0.467349	0.119719	3.90371	9.47278e-05	0.000904584	455.213	587.222	393.374	465.575	436.64	506.179	635.675	694.678	530.489	684.676	573.895	822.978
Slc35e1	3387.92	0.235805	0.0604243	3.90248	9.52119e-05	0.000908315	2787.85	3471.75	2991.89	3042.7	3013.74	3354.27	3473.27	3742.3	3788.33	3699.42	3738.13	3551.35
Nvl	1850.12	0.247826	0.0635258	3.90119	9.57217e-05	0.000912632	1731.39	1733.7	1658.91	1732.97	1660.24	1632.5	2129.84	1785.59	1989.77	1832.32	2075.98	2238.2
Inpp5j	1535.98	-0.471195	0.120795	-3.90077	9.58853e-05	0.000913642	1705.08	1979.78	1680.27	1822.33	1499.33	2020.92	1082.39	1601.22	1249.56	1186.77	1580.16	1023.94
Smpd4	1276.66	0.269726	0.0691728	3.89931	9.64655e-05	0.000918619	1102.51	1246.53	1153.15	1125.14	1075.26	1240.28	1296.47	1356.76	1403.77	1315.01	1388.87	1616.18
Diaph2	303.792	0.503053	0.129016	3.89914	9.65357e-05	0.000918738	223.66	288.95	206.802	225.733	269.862	288.702	385.555	333.079	315.473	371.681	283.044	452.957
Jmjd6	1386.78	-0.428983	0.110156	-3.89434	9.84678e-05	0.000936564	1398.53	1408.09	1762.31	1387.32	2017.26	1574.57	1190.52	1186.66	1309.48	1303.06	1161.45	942.065
Fancm	435.024	0.283105	0.072704	3.89394	9.86297e-05	0.000937543	409.166	439.329	383.258	360.938	377.137	382.721	443.443	474.663	499.646	460.798	507.526	481.666
Wdsub1	118.56	-0.524612	0.134775	-3.89251	9.92139e-05	0.000942348	153.93	123.658	122.508	124.624	143.312	170.942	117.96	103.896	85.4774	103.245	84.9131	88.2522
Carmil2	929.97	-0.309	0.0793853	-3.89241	9.92538e-05	0.000942348	1030.15	1001.69	1094.7	1081.64	994.803	974.371	697.931	945.252	789.565	879.211	904.763	765.561
Uqcrc1	7619.47	-0.210105	0.0539806	-3.89222	9.93314e-05	0.000942521	8339.87	8080.67	8010.21	8020.58	7979.37	8610.74	7211.96	7556.92	6995.93	6886.97	7507.49	6232.94
Amigo1	2486.94	-0.192626	0.0495008	-3.89137	9.9678e-05	0.000945245	2662.87	2635.97	2797.45	2467.78	2660.91	2691.39	2258.72	2452.77	2304.37	2402.89	2367.81	2140.38
Tac1	867.469	-0.374743	0.0963141	-3.89084	9.98981e-05	0.000946767	847.275	999.83	1132.92	1058.12	797.015	1042.75	699.024	860.709	796.615	761.838	708.585	704.954
Sh3bgr	52.512	-0.698593	0.179607	-3.88955	0.000100429	0.000951089	47.3632	80.7818	62.9398	57.609	71.2369	68.3769	34.9512	44.818	46.7042	42.3847	40.0165	32.9617
Asxl3	2398.64	0.288337	0.0741332	3.88944	0.000100474	0.000951089	1937.95	2178.62	2064.65	2270.26	2185.72	2318.17	2483.72	2756.31	2510.57	2452.88	2496.64	3128.17
Lamc1	545.331	-0.473988	0.121927	-3.88746	0.000101299	0.000958328	580.2	782.341	582.193	538.468	613.476	704.662	375.725	537.816	433.556	470.579	381.621	543.336
Rbm34	804.415	-0.353909	0.0910543	-3.88679	0.000101577	0.000960387	910.426	988.024	794.615	980.529	838.081	902.195	680.456	798.575	682.938	743.362	566.087	767.688
Mmp17	3618.31	0.351919	0.0905625	3.88592	0.000101942	0.000963262	3381.21	2805.61	3569.58	2722.91	3457.92	3139.64	3821.69	3742.3	3994.53	3790.71	4063.14	4930.43
Amotl2	884.635	-0.285087	0.0734532	-3.88121	0.000103936	0.000981525	961.737	919.67	1074.47	931.15	986.422	959.176	679.364	797.556	833.625	784.66	780.81	906.977
Adat2	136.463	-0.628413	0.162003	-3.87903	0.000104873	0.000989786	142.09	192.012	180.952	125.799	164.264	188.036	99.3924	122.231	117.201	70.6412	95.6492	139.29
Asns	8000.57	-0.376581	0.0971246	-3.8773	0.000105623	0.000996271	7771.52	9509.26	9244.28	9480.8	9468.64	8757.94	6321.8	7687.3	7520.25	7492.31	7541.65	5211.13
Adipor1	3848.98	0.178494	0.0460402	3.87691	0.000105792	0.000997273	3519.35	3632.7	3559.47	3445.96	3643.14	3863.29	4108.95	4098.81	4156.67	4098.27	4288.6	3772.52
Rbl2	1082.24	-0.256466	0.0661709	-3.87581	0.000106269	0.00100118	1070.94	1255.85	1140.78	1128.67	1213.54	1254.53	926.206	1042.02	1047.76	994.41	887.195	1025
Smurf2	1526.06	-0.265306	0.0684543	-3.87566	0.000106336	0.00100121	1749.81	1546.66	1762.31	1596.59	1673.65	1668.59	1505.09	1291.57	1393.19	1374.79	1215.14	1535.38
Trappc2	1225.27	0.493124	0.127258	3.87499	0.000106629	0.00100337	1238.02	809.682	1062.11	1089.87	1022.46	888.899	1775.96	1161.19	1338.56	1645.4	1508.91	1162.16
S100pbp	1360.55	-0.285359	0.0736503	-3.87451	0.00010684	0.00100476	1536.67	1496.95	1408.28	1356.75	1616.66	1549.88	1246.23	1177.49	1231.05	1276.97	1045.31	1384.39
Hspa5	17303.6	-0.451097	0.116459	-3.87344	0.000107312	0.0010086	17406	21053.6	19542.8	24788.3	19040.4	18091.4	13483.5	14919.3	15494.3	16325.7	17001.2	10496.7
Eftud2	2969.51	0.170375	0.0439909	3.87295	0.000107524	0.00101	2737.86	2953.51	2740.13	2722.91	2710.36	2895.57	2991.6	3262.54	3142.4	3111.47	3081.27	3284.47
Pacrgl	253.216	0.374527	0.0967137	3.87254	0.000107707	0.00101053	214.45	209.411	221.413	248.071	226.282	204.181	330.944	247.517	285.512	304.3	249.859	296.655
5730480H06Rik	253.216	0.374527	0.0967137	3.87254	0.000107707	0.00101053	214.45	209.411	221.413	248.071	226.282	204.181	330.944	247.517	285.512	304.3	249.859	296.655
Pde8b	1076.19	-0.311369	0.0804199	-3.87179	0.000108037	0.00101302	1156.45	1255.85	1150.9	1021.68	1172.48	1391.28	928.391	993.125	1013.39	1041.14	937.948	851.687
Gramd2	582.006	-0.264577	0.0683404	-3.87145	0.000108189	0.00101385	598.619	651.847	650.752	636.05	641.132	632.486	483.855	605.043	539.301	495.575	547.543	501.868
Rab21	1816.53	0.283685	0.0733005	3.87016	0.000108763	0.00101863	1734.02	1738.67	1418.39	1651.85	1581.46	1703.72	2185.54	2010.7	1774.76	2189.88	1894.44	1914.97
Vash2	1556.91	0.258192	0.0667446	3.86836	0.00010957	0.00102558	1344.59	1381.99	1529.66	1326.18	1518.6	1406.47	1549.87	1600.21	1811.77	1589.97	1772.44	1851.17
Btbd10	2537.79	0.270664	0.0699782	3.86783	0.000109807	0.00102719	2020.83	2645.29	2181.54	2331.4	2291.31	2324.81	2560.17	2937.61	2841.9	2736.53	2617.66	2964.42
Plcxd1	258.204	-0.485586	0.125604	-3.86601	0.000110628	0.00103427	259.182	279.629	320.318	278.639	320.147	348.532	223.906	238.35	202.678	265.176	209.843	152.049
Mcl1	3661.83	0.228758	0.0591902	3.86479	0.000111184	0.00103849	3524.61	3451.87	3108.77	3625.84	3286.96	3234.61	4281.52	3759.62	3840.32	4063.5	3623.93	4140.41
Cd24a	9220.43	0.566632	0.146616	3.86473	0.000111211	0.00103849	8239.89	5701.95	8651.97	7660.82	8103.41	6240.34	11779.6	7460.15	11627.6	10982	9342.39	14855.1
Ahsa1	3235.29	0.165032	0.0427143	3.86363	0.000111716	0.00104239	2907.58	3207.04	2962.66	3130.87	2960.1	3130.14	3266.84	3381.72	3565.38	3399.47	3457.04	3454.59
R3hdm1	5738.46	-0.404167	0.104611	-3.86353	0.00011176	0.00104239	5550.71	7824.03	5998.38	6615.63	6123.02	7107.4	3948.39	6061.63	4807.89	4961.18	4765.87	5097.36
Arap3	13.1033	-1.83894	0.476032	-3.86306	0.000111977	0.0010438	21.0503	19.2634	32.5938	34.0951	5.02849	11.3961	3.27667	8.14872	7.9309	4.34715	5.85607	4.25312
Ttc30b	643.579	0.341095	0.0883151	3.86225	0.000112345	0.00104662	651.244	520.111	606.919	547.873	573.248	510.927	811.523	624.396	708.493	754.23	644.168	769.814
Asb1	3277.57	0.252451	0.0653899	3.86071	0.00011306	0.00105266	2769.43	3435.09	2835.66	3053.28	2890.54	2959.2	3380.43	3653.68	3657.91	3259.27	3593.68	3842.69
Selplg	4.99333	2.40174	0.622668	3.85718	0.000114704	0.00106735	2.63129	1.8642	0	3.52708	1.67616	0	8.7378	8.14872	5.28726	9.78108	9.76012	8.50623
Nipa2	1117.77	0.262789	0.0681566	3.85567	0.000115415	0.00107307	1095.93	978.081	999.169	1136.9	959.603	932.585	1341.25	1139.8	1191.4	1274.8	1188.78	1174.92
Gtf3c2	647.006	0.281818	0.0730935	3.85558	0.000115454	0.00107307	531.521	648.119	546.227	621.942	518.772	633.436	711.038	680.418	697.038	720.54	720.297	734.726
Umps	621.678	0.307486	0.0797611	3.85509	0.000115685	0.00107396	567.043	533.781	555.219	530.238	563.191	585.952	680.456	595.875	706.731	614.035	800.33	727.283
Pan3	988.025	0.266525	0.0691356	3.8551	0.000115683	0.00107396	805.175	1012.26	851.935	872.365	843.948	989.565	1051.81	1070.54	1099.75	1072.66	1044.33	1141.96
Klhl20	869.777	-0.388896	0.100917	-3.85364	0.000116373	0.00107971	843.329	1164.5	908.131	977.002	900.937	1120.62	658.611	902.471	751.673	786.834	719.321	703.891
Abcc8	595.629	-0.328448	0.0852549	-3.85254	0.000116901	0.00108398	635.457	643.148	704.701	658.389	684.712	653.379	462.011	601.987	561.331	459.711	484.102	598.626
Slc3a2	7580.25	-0.44284	0.114986	-3.85124	0.000117522	0.0010891	7675.47	9243.3	8563.18	9777.07	8493.12	8655.37	5861.97	7181.06	6571.19	6943.48	7613.87	4383.9
Akt3	8041.26	-0.327343	0.0850678	-3.84802	0.000119075	0.00110285	8392.5	8681.56	10312	8064.08	9906.12	8341.03	6594.85	7005.86	7793.43	7157.58	6180.11	8066.04
Alg11	1715.56	-0.293371	0.0762486	-3.84756	0.000119302	0.00110302	1920.84	1790.87	1988.22	2003.38	2034.86	1599.26	1701.69	1451.49	1562.39	1628.01	1370.32	1535.38
Gpr27	2243.77	0.224578	0.058369	3.84756	0.000119299	0.00110302	2228.7	1877.25	2109.61	2144.47	2051.62	2012.37	2505.56	2176.73	2365.17	2428.97	2476.14	2548.68
Vma21	1697.79	0.601987	0.156451	3.84778	0.000119194	0.00110302	1436.68	1544.18	946.344	1462.56	1159.07	1541.33	2295.86	1955.69	1571.2	2563.73	1439.62	2457.24
Galnt16	2195.17	0.244402	0.0635849	3.8437	0.000121191	0.00111984	2169.5	2003.39	1956.75	1810.57	2085.15	2032.31	2454.23	2219.51	2430.38	2255.08	2258.49	2666.7
Fam110b	2447.51	0.17662	0.0459786	3.84136	0.000122357	0.00112995	2435.26	2283.64	2256.84	2303.18	2249.41	2262.14	2621.34	2540.36	2451.53	2508.3	2767.97	2690.1
Gas8	808.911	0.301432	0.078523	3.83878	0.000123649	0.00114122	682.82	783.584	679.974	725.403	713.207	759.743	798.416	915.713	872.399	832.479	873.531	1069.66
Cggbp1	3288.98	0.294338	0.0767477	3.83513	0.000125498	0.00115762	3058.88	3117.56	2701.91	2794.62	2996.98	3054.17	3829.34	3319.59	3490.48	4029.81	3074.44	4000.06
Hck	52.3384	-0.708404	0.184805	-3.83326	0.000126458	0.00116558	61.8353	52.8189	73.0551	52.9062	83.8081	65.5278	41.5045	42.7808	48.4666	39.1243	32.2084	34.0249
Chrd	351.447	-0.547182	0.14275	-3.83316	0.000126509	0.00116558	413.113	381.539	451.818	477.332	403.955	377.972	278.517	284.187	317.236	306.474	357.22	167.998
Nucb2	764.524	-0.318443	0.0830894	-3.83253	0.000126831	0.00116788	760.443	943.904	822.713	899.406	852.329	810.076	561.403	778.203	685.582	692.283	671.496	696.448
Ccdc85a	2270.61	-0.322781	0.0842296	-3.83216	0.000127025	0.00116898	2741.8	2370.64	2450.16	2559.49	2541.9	2477.71	2069.77	1954.67	1903.42	2389.84	1623.11	2164.84
Itm2a	435.589	-0.694057	0.181132	-3.83176	0.000127228	0.00117017	655.191	379.053	524.873	529.062	628.561	514.726	382.279	302.521	341.029	447.756	345.508	176.504
Ezr	368.524	-0.497175	0.129806	-3.83013	0.000128073	0.00117726	406.534	457.971	414.728	364.465	451.726	490.984	281.794	349.376	278.463	256.482	250.835	418.932
Sirt6	527.061	-0.362454	0.0946538	-3.82926	0.000128531	0.00118079	603.881	566.716	610.291	576.09	574.924	625.838	478.394	496.053	379.802	481.447	548.519	382.781
Mta2	2046.3	0.172922	0.0451605	3.82906	0.000128634	0.00118106	1927.42	1855.5	1926.41	1936.37	1993.8	1905.06	2235.78	2020.88	2162.49	2095.33	2224.33	2272.23
Rnf152	1764.14	-0.566177	0.147876	-3.82874	0.000128802	0.00118192	2428.68	1619.36	2345.63	2177.39	2571.23	1494.79	1466.86	1350.65	1467.22	1852.97	1315.66	1079.23
Lmln	616.714	-0.397533	0.103864	-3.82743	0.000129488	0.00118752	661.77	705.287	757.525	545.522	798.692	736.001	545.02	539.853	570.143	491.228	439.206	610.322
Nob1	1008.91	-0.212582	0.0555466	-3.82709	0.000129665	0.00118829	1080.14	1042.09	1093.58	1062.83	1141.47	1079.78	946.959	932.01	924.39	907.467	1030.67	865.509
Rpp14	925.812	0.230411	0.0602092	3.82685	0.000129796	0.00118829	874.904	864.365	853.059	783.012	931.108	804.378	1005.94	944.233	1075.08	966.154	998.461	1009.05
Htd2	925.812	0.230411	0.0602092	3.82685	0.000129796	0.00118829	874.904	864.365	853.059	783.012	931.108	804.378	1005.94	944.233	1075.08	966.154	998.461	1009.05
Ndp	93.4136	0.808837	0.211392	3.82625	0.000130109	0.00119047	96.0421	59.6543	76.4269	77.5958	46.0945	54.1317	156.188	76.3943	123.37	86.943	128.834	139.29
Ints14	1079.03	0.240557	0.062891	3.82498	0.000130782	0.00119593	968.315	960.682	1037.38	959.366	1044.25	965.823	1165.4	1041	1233.7	1284.58	1180.97	1106.87
Top2a	62.6652	-1.06445	0.278476	-3.82242	0.000132148	0.00120773	99.989	61.5185	59.568	63.4875	130.741	93.0685	40.4123	35.6507	38.7733	36.9508	19.5202	72.303
Smim45	1829	0.312828	0.081846	3.82216	0.000132289	0.00120832	1832.69	1434.19	1656.66	1643.62	1696.28	1529.93	2396.34	1792.72	2006.52	1872.53	2088.67	1997.9
Maf	1613.04	-0.432734	0.11323	-3.82173	0.000132518	0.00120972	2269.49	1767.26	1522.92	1923.44	1692.92	1943.99	1647.07	1376.12	1183.47	1499.77	1432.79	1097.3
Sema4f	1670.84	-0.322369	0.0843619	-3.82127	0.000132767	0.0012099	1747.18	2023.27	1861.22	1784.7	1811.93	1909.8	1216.74	1748.92	1429.32	1445.43	1418.15	1653.4
Tbrg1	1868.38	-0.280411	0.0733805	-3.82133	0.000132735	0.0012099	1785.33	2106.54	1945.51	2230.29	2125.37	2101.64	1569.53	1802.9	1830.27	1781.24	1653.36	1488.59
Dnal4	1099.42	0.307991	0.080599	3.82127	0.000132766	0.0012099	993.312	915.942	1078.97	978.177	863.224	1068.39	1346.71	1081.74	1158.79	1113.96	1302	1291.88
Ranbp9	2359.24	0.209426	0.0548118	3.82082	0.000133009	0.00121101	2026.09	2417.86	2118.6	2182.09	2246.9	2130.13	2384.33	2518.97	2644.51	2649.59	2452.72	2539.11
Oxld1	119.892	-0.659887	0.172711	-3.82076	0.00013304	0.00121101	155.246	95.074	155.102	171.651	152.531	153.848	105.946	80.4686	109.27	80.4222	113.217	65.9233
Nr2f2	537.192	-0.460115	0.120527	-3.81751	0.000134803	0.00122635	673.61	595.921	584.441	851.202	503.687	527.072	446.72	457.347	451.18	449.93	507.526	397.666
Wdr20	616.573	0.236211	0.0618983	3.81611	0.00013557	0.00123263	559.149	582.25	539.484	553.752	573.248	585.002	659.704	659.028	624.778	717.279	628.552	716.65
Gfod1	2217.68	-0.526228	0.137981	-3.81377	0.00013686	0.00124293	1972.15	3300.87	2318.66	2735.84	2251.09	3125.39	1473.41	2421.19	1775.64	1762.77	1780.25	1694.87
Rtl6	3553.79	-0.273398	0.0716867	-3.81378	0.000136855	0.00124293	3818	4145.97	3706.7	3668.16	3801.54	4193.78	2808.11	3583.4	3144.16	3158.2	3025.64	3591.76
Ttc27	817.636	0.297164	0.0779326	3.81309	0.000137242	0.00124569	777.546	725.172	776.632	771.255	750.921	603.046	977.541	816.909	910.291	968.327	870.603	863.383
Arhgap1	3951.1	0.275983	0.072419	3.81091	0.000138454	0.00125597	3116.76	4095.64	3478.55	3651.71	3485.58	3611.63	3910.16	4503.19	4470.38	4134.14	4180.26	4775.19
Fam181a	202.567	-0.612506	0.160743	-3.81046	0.000138707	0.00125755	199.978	233.646	239.396	292.748	252.262	251.665	114.684	230.201	155.974	188.014	154.21	118.024
Bckdhb	522.042	-0.3326	0.0872912	-3.81024	0.000138834	0.00125798	515.733	616.427	504.642	667.794	555.648	629.637	512.253	470.589	472.329	451.017	454.822	413.616
Rgs9	484.404	-0.342895	0.0900263	-3.80883	0.000139625	0.00126442	614.406	513.275	514.757	466.75	548.105	592.6	467.472	421.696	395.664	421.673	374.789	481.666
Ctnnb1	21350.7	0.242999	0.063809	3.80823	0.000139968	0.00126681	21064.8	18467.3	20218.3	19631.7	19627	18336.4	24950.8	20243.5	23464.9	22224.8	22657.1	25322
Rph3a	6929.5	0.310415	0.0815151	3.80807	0.000140055	0.00126687	6724.26	6524.06	5167.8	6280.56	5898.42	6525.24	8001.64	7631.28	6650.5	7229.31	8815.34	7705.59
Atp6v1a	22340.8	0.209914	0.0551742	3.80457	0.000142052	0.0012842	19372.9	23328.5	19523.7	20365.4	19803	21907.2	23828	24603	23875.5	23747.4	22963.6	24771.2
Pld5	119.042	-0.601241	0.158056	-3.80397	0.000142397	0.00128659	144.721	154.728	119.136	129.326	127.388	184.238	122.329	96.7661	81.9526	111.939	86.8651	69.1132
Taf11	837.063	0.242338	0.063713	3.80359	0.000142617	0.00128785	818.331	728.279	745.162	731.282	790.311	790.133	974.264	845.43	890.023	911.814	981.868	837.864
Elf1	80.1947	0.58463	0.153737	3.8028	0.000143071	0.00129121	76.3074	71.4608	48.3287	49.3791	65.3703	73.1253	101.577	107.971	99.5768	90.2033	102.481	76.5561
3632454L22Rik	64.7381	-0.74702	0.196506	-3.80151	0.000143816	0.00129721	85.5169	60.8971	82.0465	65.8389	117.331	75.0246	57.8879	46.8551	50.229	47.8186	33.1844	54.2272
Vsig2	26.8445	1.10537	0.290812	3.80098	0.000144123	0.00129923	17.1034	16.7778	22.4785	12.9326	15.9235	17.0942	38.2279	24.4462	43.1793	23.9093	27.3283	62.7335
Erap1	104.877	-0.531139	0.13984	-3.79818	0.000145763	0.00131328	132.88	137.329	110.145	125.799	120.684	116.811	90.6546	116.119	89.0023	71.7279	76.129	71.2397
Pbk	13.9016	-1.37287	0.361516	-3.79754	0.000146142	0.00131594	30.2598	13.0494	20.2306	14.1083	20.114	22.7923	10.9222	8.14872	4.40605	4.34715	7.8081	10.6328
6820431F20Rik	215.629	-0.410705	0.108162	-3.79713	0.000146378	0.00131732	226.291	276.522	224.785	279.815	222.93	245.017	149.635	208.811	170.074	193.448	190.322	199.897
Slc1a6	302.862	-0.410909	0.108245	-3.7961	0.000146989	0.00132207	365.749	314.428	349.54	322.14	389.708	332.388	285.071	229.183	258.195	264.089	205.939	317.921
Neurl1a	2390.27	0.270877	0.0713961	3.794	0.000148239	0.00133148	2458.94	2007.12	2132.08	2068.05	2225.11	2112.09	2635.54	2403.87	2512.33	2384.41	2843.12	2900.63
Ubr7	1642.62	0.256039	0.0674868	3.79392	0.000148287	0.00133148	1481.42	1529.26	1595.97	1293.26	1599.9	1480.55	1809.82	1593.08	1881.38	1831.24	1719.73	1895.83
Gsg1l	814.876	0.620459	0.163532	3.79411	0.000148174	0.00133148	785.44	453.621	615.911	492.616	869.09	638.184	1162.13	677.362	997.531	955.286	969.18	1162.16
Gpr85	4281.29	0.183506	0.0483963	3.79173	0.000149602	0.00134253	3879.84	4084.45	4172.01	4040.86	3886.18	3992.45	4413.68	4346.32	4715.36	4433	4396.94	5014.43
Cript	2240.54	0.298756	0.0787986	3.79139	0.000149807	0.00134307	2194.5	1876.62	1988.22	2153.87	1982.9	1864.22	2851.8	2184.88	2580.19	2631.11	2381.47	2196.74
Lama3	132.539	-0.581503	0.153376	-3.79135	0.000149831	0.00134307	127.618	157.835	146.11	177.53	157.559	186.137	96.1158	150.751	88.1211	91.2901	121.026	90.3787
Glra2	3738.44	0.455168	0.120061	3.79113	0.000149965	0.00134351	3699.59	2581.91	3384.14	3371.89	3349.81	2537.54	5279.81	3293.1	4264.18	4672.1	4392.06	4035.15
Htatip2	96.9674	-0.592163	0.15628	-3.78913	0.000151178	0.00135286	128.933	107.502	113.516	111.691	106.436	132.955	86.2857	72.3199	103.102	81.509	68.3209	51.0374
Gm10335	82.8344	-2.41519	0.637385	-3.78921	0.000151126	0.00135286	117.092	52.8189	129.251	459.696	38.5517	39.8865	38.2279	23.4276	31.7236	30.43	24.4003	8.50623
Phlda1	341.847	-0.551584	0.145581	-3.78884	0.000151352	0.00135289	363.118	463.563	309.079	422.074	346.966	531.82	300.362	350.395	221.184	270.61	286.948	236.048
Dap	177.219	-0.434124	0.114579	-3.78886	0.000151341	0.00135289	168.403	215.004	182.076	183.408	232.987	237.42	140.897	148.714	166.549	166.278	143.474	141.416
Rps6ka1	436.709	-0.30249	0.079847	-3.78837	0.000151641	0.0013547	413.113	492.148	523.749	462.048	529.667	471.041	364.803	405.399	427.387	405.372	375.765	370.021
Lrrc55	1304.23	-0.634819	0.167606	-3.78756	0.000152135	0.00135836	1194.61	1897.75	1404.91	1757.66	1555.48	1708.47	728.514	1355.74	1036.3	1183.51	1177.07	650.727
Neurod2	1828.88	-0.382961	0.101126	-3.78698	0.00015249	0.00136076	1835.33	2208.45	2096.12	2080.98	2074.25	2124.43	1208	1991.34	1454.88	1567.15	1594.8	1710.82
Fbxo34	1331.17	-0.211717	0.0559413	-3.78463	0.000153936	0.00137289	1397.22	1547.9	1393.67	1368.51	1433.96	1426.42	1224.38	1232.49	1245.15	1258.5	1328.35	1117.51
Inafm2	804.321	0.273974	0.0724215	3.78305	0.000154917	0.00138087	792.018	668.625	774.384	653.686	777.74	704.662	899.993	838.3	877.686	965.067	802.282	897.408
Ttbk2	3684.59	-0.321544	0.0850118	-3.78235	0.000155357	0.00138401	3827.21	4763.64	3689.84	4158.43	4039.55	4077.92	2975.22	3737.21	3197.03	3639.65	2821.65	3287.66
Akr1b10	129.472	-0.50332	0.133151	-3.78008	0.00015678	0.0013959	193.4	133.601	152.854	139.908	162.588	131.056	108.13	92.6917	126.894	97.8108	95.6492	119.087
Parl	557.775	-0.308755	0.0816945	-3.77939	0.000157213	0.00139898	568.359	671.732	605.795	648.983	533.02	673.322	513.345	555.132	485.547	503.182	448.966	485.919
Cnst	1546.33	0.228027	0.0603527	3.77825	0.000157935	0.00140461	1360.38	1598.86	1372.31	1441.4	1463.29	1303.91	1631.78	1696.97	1643.46	1636.7	1793.91	1612.99
Gm11266	57.7907	0.867138	0.229532	3.77786	0.000158182	0.00140602	56.5727	30.4485	49.4527	29.3923	54.4753	26.591	86.2857	57.041	77.5465	71.7279	97.6012	56.3538
Kctd20	4332.24	0.19536	0.0517282	3.77666	0.000158948	0.00141204	3898.26	4231.72	4111.32	3711.67	3994.3	4284.95	4323.02	4688.57	4957.69	4514.51	4589.21	4681.62
Cacna1b	6460.36	-0.363281	0.0962019	-3.77624	0.000159217	0.00141364	6586.12	8354.7	6842.45	6913.08	7169.79	7747.48	4765.38	6518.98	5510.21	5041.61	5316.34	6758.2
Dgcr2	3282.76	-0.264198	0.0699769	-3.77551	0.000159682	0.00141698	3500.93	3710.99	3619.04	3445.96	3514.91	3701.85	2766.6	3006.88	3212.01	2977.8	2534.7	3401.43
Becn1	1857.8	0.226265	0.059933	3.77529	0.000159819	0.0014174	1620.87	1832.5	1670.15	1749.43	1586.49	1812.94	1959.45	1944.49	2069.08	1896.44	2215.55	1936.23
Rnf227	2707.01	-0.379127	0.100535	-3.77108	0.000162541	0.00144074	3648.28	2611.12	3046.96	3167.32	3309.58	2583.13	2787.36	2131.91	2210.96	2590.9	2212.62	2183.98
Akap12	1994.28	-0.357439	0.0947969	-3.77057	0.000162872	0.00144287	2072.14	2437.75	2216.38	2045.71	2504.19	2161.47	1437.37	1981.16	1802.08	2060.55	1624.08	1588.54
Rtn4ip1	566.983	0.316805	0.0840296	3.77016	0.000163144	0.00144447	473.632	523.839	501.27	537.292	496.144	496.682	624.752	604.024	638.878	737.928	656.856	512.501
Tgfbr2	88.0296	-0.822054	0.2181	-3.76915	0.000163802	0.00144949	74.9918	144.164	94.4096	103.461	93.8651	162.395	43.689	89.6359	55.5163	78.2487	58.5607	57.4171
Tcf19	49.1319	-0.681659	0.180887	-3.76842	0.000164283	0.00145261	80.2544	54.6831	59.568	47.0278	67.0465	55.0814	40.4123	43.7994	35.2484	36.9508	31.2324	38.2781
Fancf	103.681	0.593113	0.157394	3.76834	0.000164338	0.00145261	85.5169	80.1604	87.6661	77.5958	88.8366	75.9743	146.358	83.5244	124.251	128.241	104.433	161.618
Celf4	10261.5	-0.346645	0.0920167	-3.7672	0.00016509	0.00145802	12300	11280.9	10954.9	11918	11072.7	11403.7	8507.34	9782.54	7429.49	9089.89	8046.24	11352.6
Gabrd	648.8	-0.398659	0.105826	-3.76713	0.000165133	0.00145802	788.071	747.543	651.876	639.577	689.741	909.792	634.582	571.429	541.945	555.348	608.056	447.641
Klhl24	4150.33	0.211512	0.0561509	3.76685	0.000165322	0.00145888	3854.84	3850.81	4132.67	3817.48	3755.44	3669.56	4580.79	4048.9	4610.49	4817.73	4119.75	4545.52
Pdzd7	365.807	-0.426453	0.113239	-3.76596	0.000165908	0.00146323	348.646	407.016	479.916	477.332	428.26	376.073	288.347	353.451	299.612	340.164	348.436	242.428
Dnajb11	2292.76	-0.237236	0.0630296	-3.76388	0.000167296	0.00147466	2435.26	2614.85	2292.81	2700.57	2386.02	2454.92	2026.08	2158.39	2136.94	2294.21	2149.18	1863.93
Chic1	477.272	-0.41396	0.109998	-3.76334	0.000167662	0.00147706	552.571	548.074	472.048	577.266	523.801	596.398	421.599	396.232	371.871	474.926	305.492	486.982
Rdx	2171.68	-0.260225	0.0691704	-3.76209	0.000168499	0.00148362	2368.16	2578.18	2213.01	2361.97	2211.7	2465.37	1916.85	2102.37	1833.8	1981.21	1785.13	2242.46
Ctbp1	8133.55	0.177874	0.0472882	3.76149	0.000168902	0.00148634	7955.71	7559.94	7468.48	7917.12	7622.35	7276.44	8901.63	8601.99	8135.34	8447.6	9398.02	8318.03
Gtf2f1	1813.85	0.224315	0.0596652	3.75957	0.000170205	0.00149697	1665.61	1644.22	1634.19	1741.2	1545.42	1810.09	1917.95	1898.65	1869.05	1833.41	2152.11	2054.26
Kcnk4	184.788	-0.467306	0.124313	-3.75911	0.000170521	0.00149892	203.925	185.798	246.139	164.597	231.31	254.514	180.217	161.956	150.687	145.629	139.57	153.112
Bnip5	268.96	0.394907	0.105095	3.75761	0.000171543	0.00150707	257.866	267.823	201.182	181.057	255.615	226.973	316.745	276.038	303.136	332.557	305.492	303.035
Abr	12974.9	0.264534	0.0704054	3.7573	0.000171755	0.0015081	11389.5	12786.5	11422.4	11540.6	11540.4	12048.6	13762	13930.2	13883.5	12591.5	13782.3	17021
Ankrd13c	4461.95	0.210765	0.0560978	3.7571	0.000171897	0.00150851	4181.12	4438.65	3797.74	4139.62	4050.45	4206.13	5031.88	4664.12	4538.24	5202.45	4448.66	4844.3
Pnma8b	7936.84	0.377249	0.100443	3.75585	0.000172751	0.00151517	8113.58	6241.95	6788.5	6308.77	7302.2	6677.19	9373.47	7662.85	8686.09	8135.69	8450.31	11501.5
Col5a3	54.8299	0.672723	0.179175	3.75455	0.000173653	0.0015214	55.2571	37.2839	48.3287	34.0951	48.6087	31.3394	66.6257	64.1712	67.8532	60.8601	59.5367	83.9991
Fam184b	584.391	-0.562095	0.149709	-3.75458	0.000173632	0.0015214	661.77	600.271	781.127	590.198	926.08	621.09	443.443	483.83	524.32	449.93	318.18	612.449
Rala	5559.27	0.217303	0.0578858	3.754	0.000174038	0.00152393	5182.33	5211.67	4758.7	5337.65	5356.18	4999.11	6125.19	5755.03	5942	6391.39	5286.08	6365.85
Pyurf	266.281	-0.434554	0.115821	-3.75193	0.00017548	0.00153571	357.855	266.58	268.618	313.91	340.261	290.602	282.886	197.606	236.164	208.663	196.178	236.048
Plekha7	413.187	-0.337049	0.0898392	-3.75169	0.00017565	0.00153636	439.425	439.329	504.642	416.196	484.411	482.437	342.958	411.51	336.623	421.673	361.125	317.921
Carmil3	6180.7	-0.257774	0.0687141	-3.7514	0.000175849	0.00153725	7076.86	6413.45	6948.1	6642.67	6356.85	6953.55	5534.3	6055.52	5088.99	5256.79	6533.43	5307.89
Lemd1	281.763	0.289968	0.077308	3.75081	0.000176266	0.00154005	255.235	237.374	280.981	241.017	248.91	260.212	328.76	303.54	313.711	295.606	319.156	296.655
Rnf144a	1046.7	0.375984	0.100273	3.7496	0.000177116	0.00154662	913.058	912.835	1018.28	819.459	891.719	910.742	1205.82	1065.45	1188.75	1058.53	1028.72	1547.07
C230014O12Rik	45.361	0.947458	0.252783	3.74811	0.000178173	0.001555	44.7319	22.9917	33.7177	27.041	30.1709	28.4904	90.6546	30.5577	46.7042	61.9469	62.4648	64.86
Sfxn5	1233.15	-0.307219	0.0819888	-3.74709	0.000178898	0.00156047	1293.28	1505.03	1319.49	1321.48	1380.32	1360.89	966.619	1234.53	1075.96	1034.62	1006.27	1299.33
Smpd1	4205.29	-0.240104	0.0640828	-3.74678	0.000179118	0.00156153	4282.43	4912.78	4541.78	4572.27	4321.99	4693.31	3539.9	4308.64	3834.15	3784.19	4144.15	3527.96
Spdya	38.788	0.941967	0.251497	3.74543	0.000180083	0.00156908	31.5755	16.1564	22.4785	38.7979	22.6282	29.44	70.9946	35.6507	41.4169	63.0336	50.7526	42.5312
Foxo1	671.178	0.470367	0.125595	3.74511	0.000180315	0.00157024	624.931	521.353	511.386	640.753	566.543	512.827	761.28	668.195	728.761	740.102	663.688	1114.32
Pcgf2	1078.55	0.194171	0.0518514	3.74476	0.000180566	0.00157157	930.161	1046.44	1007.04	962.893	1028.33	1055.09	1083.49	1163.23	1149.98	1160.69	1187.81	1167.48
Nop14	1227	-0.289719	0.0774063	-3.74283	0.00018196	0.00158283	1211.71	1432.32	1235.19	1395.55	1418.87	1401.73	981.91	1307.87	1068.03	1086.79	1105.82	1078.17
Eif3g	2134.76	-0.241333	0.064491	-3.74212	0.000182477	0.00158646	2281.33	2335.22	2208.51	2366.67	2195.77	2490.06	1807.63	2168.58	1915.75	2043.16	2057.43	1746.97
Gucd1	763.326	0.263172	0.0703304	3.74193	0.000182612	0.00158677	709.133	634.448	750.781	653.686	739.188	679.02	908.731	765.98	897.073	783.573	811.066	827.231
Rell2	1425.55	-0.454449	0.121464	-3.74142	0.000182985	0.00158914	1484.05	1475.2	1660.04	1847.02	1671.97	1752.16	1007.03	1422.97	1047.76	1170.47	1591.88	976.09
Specc1l	2601.71	0.18202	0.0486532	3.74117	0.000183165	0.00158983	2501.04	2506.1	2378.22	2352.56	2468.99	2417.88	2849.61	2595.37	2795.2	2582.21	2797.25	2976.12
Camkv	14937.8	0.281218	0.0751794	3.74063	0.000183558	0.00159237	13944.5	12725.6	14608.8	12229.6	13929.8	13482.6	15944.3	15404.1	17057.6	14307.6	16289.6	19329.4
4833420G17Rik	890.287	0.208585	0.0557804	3.73939	0.000184466	0.00159938	799.912	812.789	822.713	844.148	893.395	782.535	961.158	898.397	1001.94	994.41	943.804	928.243
Cdc123	1559.63	0.270067	0.0722478	3.73807	0.00018544	0.00160695	1514.31	1352.78	1402.66	1290.91	1537.04	1386.53	1836.03	1554.37	1713.07	1705.17	1522.58	1900.08
Tcta	1056.71	-0.216624	0.0579762	-3.73643	0.000186648	0.00161653	1202.5	1106.09	1159.89	1183.92	1065.2	1103.53	1011.4	1010.44	1003.7	868.343	980.892	984.597
Arhgap33	12920.6	0.33464	0.0895873	3.73536	0.00018745	0.0016226	10477.8	12240.3	11867.5	10624.7	11481.7	11877.6	11513.1	15399	13649.1	13574	14956.4	17385.7
Lrrc3	2402.53	0.189046	0.0506142	3.73503	0.000187692	0.0016238	2278.7	2270.59	2342.26	2105.67	2337.41	2136.78	2556.9	2588.24	2654.21	2388.76	2459.55	2711.36
Pik3r4	1193.77	0.392675	0.105298	3.72918	0.000192105	0.00166107	840.697	1278.22	949.716	1066.35	869.09	1185.2	1222.2	1484.09	1359.71	1287.84	1361.54	1420.54
Cdkl4	102.026	0.518618	0.13911	3.72813	0.000192907	0.0016671	97.3577	80.7818	98.9053	65.8389	78.7796	82.6221	125.606	101.859	129.538	129.328	97.6012	136.1
Alcam	7903.94	-0.384248	0.103091	-3.72725	0.000193582	0.00167202	9413.44	9877.75	6963.84	9442	8426.91	9575.61	7707.83	7586.46	5704.08	7633.59	6363.6	6152.13
Fbxo7	2788.03	0.341129	0.0915699	3.72535	0.000195048	0.00168377	2419.47	2498.02	2381.6	2424.28	2700.3	2334.31	2784.08	2900.94	3152.09	3022.35	2783.59	4055.35
Me1	1649.04	0.433192	0.116302	3.72471	0.000195541	0.00168712	1443.26	1477.06	1427.38	1295.61	1443.18	1332.4	1782.51	1811.05	1944.83	1657.35	1505.01	2668.83
Slc35f5	1617.26	-0.33724	0.0905847	-3.72292	0.000196931	0.00169818	1715.6	1854.25	1899.43	1946.95	1752.43	1664.79	1365.28	1419.91	1491.01	1611.71	1593.83	1091.99
Cfdp1	3396.98	-0.429823	0.115458	-3.72278	0.000197043	0.00169822	4548.19	3193.37	4152.9	4299.51	4057.15	3148.19	3206.77	2605.55	3026.08	3204.94	3086.15	2235.01
Akap17b	885.578	-0.237797	0.0638869	-3.72215	0.000197535	0.00170155	902.533	1061.97	931.733	994.637	965.47	889.849	764.557	859.69	789.565	832.479	854.011	780.447
Leprot	1685.12	0.303733	0.0816109	3.72172	0.000197873	0.00170353	1553.78	1340.36	1670.15	1408.48	1615.82	1464.4	2088.33	1679.66	2023.26	1949.7	1790.01	1637.45
Trim66	1536.15	-0.702158	0.188746	-3.72013	0.00019912	0.00171334	1323.54	2407.92	1780.3	2092.74	1895.74	1915.5	894.532	1599.19	1223.12	1283.5	1395.7	622.018
Tmem47	2573.75	-0.524086	0.140941	-3.71847	0.000200434	0.00172371	3365.42	3020.62	2436.67	3664.64	2654.2	3075.06	2514.3	2141.08	1779.16	2801.74	1535.27	1896.89
Aplf	260.973	-0.380267	0.102297	-3.71728	0.00020138	0.00172999	256.551	308.835	284.353	310.383	297.519	311.495	214.076	247.517	243.214	255.395	173.73	228.605
Syt12	136.485	-0.424391	0.114167	-3.71728	0.000201382	0.00172999	169.718	153.485	162.969	136.38	163.426	152.898	121.237	120.194	123.37	132.588	112.241	89.3155
Tor1b	1076.62	0.244208	0.0657065	3.71665	0.000201883	0.00173315	1035.41	962.546	953.088	995.813	965.47	1004.76	1249.5	1070.54	1213.43	1013.97	1227.82	1227.02
Tstd3	411.737	-0.488513	0.131443	-3.71654	0.000201968	0.00173315	505.208	380.917	517.005	560.806	522.125	400.765	423.783	308.633	370.109	374.942	318.18	258.377
Ocrl	2989.3	0.170981	0.0460089	3.71625	0.000202201	0.00173421	2707.6	3025.59	2664.82	2955.69	2785.78	2729.38	3163.08	3191.24	3222.59	3144.07	3236.46	3045.23
Pcdh10	7613.35	-0.258006	0.0694562	-3.71466	0.000203477	0.00174421	8246.46	9191.73	7413.41	8526.13	7926.57	8444.54	6974.95	7365.43	6150.85	7668.37	6467.06	6984.68
Abcc1	681.149	-0.231945	0.0624592	-3.71354	0.000204378	0.00175099	739.393	731.386	747.41	697.186	738.35	761.642	589.801	661.065	661.789	577.084	592.439	676.246
Hs1bp3	435.156	0.437575	0.117887	3.71182	0.000205771	0.00176198	369.696	354.819	401.241	289.221	470.164	331.438	481.671	409.473	535.776	523.831	478.246	576.297
Mrps23	1549.53	0.233302	0.0628569	3.71164	0.000205924	0.00176234	1557.72	1336.63	1384.67	1447.28	1383.67	1442.56	1858.97	1576.78	1705.14	1624.75	1746.09	1530.06
Ccdc127	2450.99	0.20528	0.0553122	3.71129	0.000206209	0.00176382	2110.29	2511.69	2128.71	2227.94	2287.12	2386.54	2643.18	2576.01	2742.33	2656.11	2485.9	2656.07
Fads3	2289.25	-0.2512	0.0677089	-3.71	0.000207263	0.00177189	2516.83	2328.38	2656.96	2365.5	2678.51	2384.64	2020.62	2118.67	2307.89	1897.53	1929.58	2265.85
Otud5	2942.24	0.20847	0.056195	3.70975	0.00020746	0.00177262	2989.15	2609.87	2742.38	2761.7	2683.54	2600.22	3317.09	2908.07	3228.76	3231.02	3305.75	2929.33
Lrfn2	1015.45	0.313642	0.0845833	3.70808	0.000208833	0.00178339	895.954	864.365	940.725	944.082	921.051	868.007	1050.72	1046.09	1082.13	1017.23	1129.25	1425.86
Cyp7b1	85.5127	-0.646134	0.174264	-3.70778	0.00020908	0.00178454	103.936	85.753	83.1704	82.2986	137.445	132.955	78.6402	72.3199	65.2096	58.6865	68.3209	57.4171
E130307A14Rik	980.784	-0.21591	0.0582378	-3.70738	0.000209413	0.00178643	1110.4	970.625	1080.09	1108.68	1086.99	972.471	925.114	862.746	888.26	942.244	923.308	898.471
Stk35	1023.77	0.3779	0.101948	3.70679	0.000209906	0.00178967	873.588	967.518	832.828	807.702	878.309	980.069	1118.44	1159.16	1110.33	946.592	1101.92	1508.79
Arfgap3	1124.79	-0.283086	0.0763872	-3.70593	0.000210614	0.00179474	1149.87	1161.39	1419.52	1299.14	1269.69	1112.07	966.619	1012.48	1090.94	1035.71	1079.47	900.598
Icmt	2008.94	0.213703	0.0576863	3.70457	0.000211752	0.00180347	1757.7	2015.82	1834.24	1809.39	1768.35	1972.48	2029.35	2291.83	2170.42	2026.86	2281.92	2148.89
Pafah1b2	10466.9	0.233045	0.0629239	3.7036	0.000212562	0.00180939	9264.77	10504.1	8616	9479.62	9606.09	10262.2	11503.3	11676.1	11016	11760.1	10032.4	11882.1
Adat1	291.887	0.345953	0.0934687	3.70127	0.00021452	0.00182508	268.392	245.452	242.768	246.896	228.796	311.495	329.852	310.67	356.009	310.821	300.612	350.882
Bcl2l13	2566.43	0.275651	0.0744842	3.7008	0.000214923	0.00182656	1985.31	2592.47	2183.79	2247.93	2333.22	2582.18	2646.46	3031.32	2781.1	2608.29	2870.45	2934.65
Taf5	374.652	0.351857	0.095075	3.70084	0.000214887	0.00182656	311.808	336.798	345.045	367.992	331.042	283.004	404.123	375.86	442.368	490.141	445.062	362.578
Gse1	561.843	0.475187	0.128413	3.70046	0.000215213	0.00182707	538.099	431.251	496.775	443.237	470.164	442.55	619.291	621.34	459.111	600.993	785.69	833.611
Gemin8	126.773	0.589244	0.159232	3.70053	0.000215147	0.00182707	109.199	107.502	130.375	96.4069	93.027	72.1756	127.79	118.156	171.836	136.935	183.49	174.378
Kifap3	15767.4	-0.255054	0.068952	-3.699	0.000216449	0.00183623	16021.9	18775.6	16347.5	16714.8	17236.8	17844.5	12796.5	15812.6	14811.4	14946.6	12763.3	15137.9
Lrrn1	1397.73	0.456173	0.123326	3.69891	0.000216526	0.00183623	1256.44	1150.21	1186.86	1095.75	1253.77	1128.22	1655.81	1397.51	1608.21	1438.91	1275.65	2325.39
Tmem42	574.777	-0.319663	0.0864238	-3.69878	0.000216639	0.00183623	695.976	564.23	644.009	644.28	679.684	603.996	576.695	478.737	554.282	542.307	478.246	434.881
Mak16	361.777	0.315119	0.0852174	3.69783	0.000217451	0.00184213	311.808	328.72	292.22	300.978	312.604	385.57	405.215	382.99	378.921	380.375	420.661	441.261
Mapkapk2	1027.76	0.293188	0.0792946	3.69745	0.000217775	0.00184342	819.647	1031.52	907.007	955.839	867.414	957.276	1001.57	1201.94	1124.42	1015.06	1218.06	1233.4
Dlg2	15221.2	0.320721	0.0867428	3.69738	0.000217835	0.00184342	11876.3	15368.4	14210.9	12899.7	13109.3	13748.5	15532.5	17245.8	16975.6	15281.3	15640.6	20765.8
Jpt1	9567.89	0.175044	0.0473879	3.69385	0.000220881	0.0018682	9208.2	8708.9	9501.66	8443.83	9340.42	8729.45	9690.22	10198.1	10626.5	9601.76	10182.7	10582.8
Fam210b	1524.46	-0.315609	0.0854645	-3.69287	0.000221739	0.00187445	1787.96	1631.17	1500.44	1528.4	1807.74	1886.06	1503.99	1404.64	1350.9	1499.77	1187.81	1204.7
Etl4	2132.67	-0.615293	0.166632	-3.69252	0.000222046	0.00187605	2094.51	3239.35	2191.65	2478.36	1923.4	3555.6	1303.02	2403.87	1624.95	1505.2	1731.45	1540.69
Brk1	4683.8	0.358663	0.0971453	3.69203	0.000222469	0.00187863	4849.47	3574.91	4234.95	4114.93	4208.01	3649.62	6147.04	4242.43	5293.43	5299.17	5692.1	4899.59
Hhipl1	137.504	-0.531402	0.14403	-3.68952	0.000224674	0.00189624	161.824	157.214	159.597	144.61	134.931	217.476	81.9168	124.268	112.795	107.592	118.097	129.72
Kank4	43.694	-1.21736	0.330006	-3.68891	0.00022522	0.00189984	51.3102	64.6255	46.0809	39.9736	82.132	81.6724	27.3056	42.7808	18.5054	45.6451	13.6642	10.6328
Limk1	3015.46	-0.23361	0.0633399	-3.6882	0.00022585	0.00190414	3125.97	3266.69	3375.14	3251.97	3302.88	3231.76	2528.5	3153.56	2699.15	2780	2969.03	2500.83
Hmgb3	2789.46	0.27216	0.0738294	3.68634	0.000227501	0.00191704	2937.84	2343.29	2447.91	2341.98	2666.77	2428.33	3459.07	2779.73	3097.46	2965.84	2926.08	3079.26
Emc9	250.778	-0.456559	0.123905	-3.68475	0.000228931	0.00192807	360.487	246.074	287.725	277.464	308.414	262.111	210.799	228.164	169.192	257.569	220.579	180.757
Sc5d	2529.54	-0.20579	0.0558615	-3.68394	0.000229653	0.00193211	2857.58	2754.66	2562.55	2661.77	2784.94	2634.41	2422.55	2254.14	2273.52	2643.07	2281.92	2223.32
R74862	370.731	0.38721	0.105105	3.68401	0.000229591	0.00193211	336.805	298.893	323.69	283.342	370.432	315.293	462.011	343.265	496.122	371.681	442.134	405.109
Hectd2	1217.66	0.263071	0.071413	3.68379	0.000229788	0.00193221	994.628	1194.95	1110.44	1241.53	1042.57	1055.09	1401.32	1417.88	1267.18	1336.75	1357.63	1191.94
Cnot10	1280.89	0.23374	0.0634558	3.68351	0.000230047	0.00193337	1298.54	1181.28	1123.92	1208.61	1076.1	1180.45	1403.51	1290.55	1409.94	1323.71	1534.29	1339.73
Rbbp7	5017.57	0.151326	0.0410855	3.6832	0.000230323	0.00193467	4690.28	4799.68	4665.41	4766.26	4939.65	4663.87	5289.64	5281.39	5298.72	4905.76	5293.89	5616.24
Kremen2	13.2522	-1.5511	0.421318	-3.68153	0.000231836	0.00194634	19.7347	16.7778	34.8417	7.05416	25.9805	14.2452	3.27667	9.16731	7.9309	7.60751	3.90405	8.50623
Actl6a	278.492	0.331619	0.0901073	3.68026	0.000232992	0.00195502	255.235	231.16	234.9	271.585	225.444	264.011	337.497	268.908	310.186	328.21	330.868	283.896
Epop	376.403	-0.456911	0.124161	-3.67998	0.000233255	0.00195619	403.903	411.366	431.587	470.278	465.973	431.154	275.241	380.953	326.048	280.391	406.021	233.921
Frg2f1	419.139	0.342678	0.0931641	3.67822	0.000234871	0.0019687	372.328	361.033	333.806	383.276	404.793	361.828	444.535	424.752	453.824	420.587	484.102	584.804
Gapdh	41544.5	-0.296094	0.0805175	-3.67739	0.000235635	0.00197406	44183.3	42980.9	46582.2	39275.2	49371.4	52362.4	36294.6	41324.2	37661.2	37457.2	31967.3	39074.5
Hs3st2	874.609	0.388148	0.105584	3.6762	0.000236732	0.00198221	613.091	851.316	872.165	677.2	779.416	749.297	778.756	952.382	1066.27	1107.44	985.772	1062.22
Ptpn1	3627.87	0.243001	0.0661165	3.67535	0.000237523	0.00198779	2962.83	3517.12	3315.58	3453.01	3210.69	3475.82	3781.28	4023.43	3813	3862.44	4507.22	3611.96
Zfp385c	7.16022	-2.11741	0.576194	-3.67483	0.00023801	0.00199081	11.8408	12.428	8.9914	4.70278	18.4378	13.2955	2.18445	7.13013	0.881211	0	3.90405	2.12656
Dipk1b	1821.96	-0.277876	0.0756826	-3.6716	0.000241039	0.00201509	2165.55	1798.95	2196.15	1838.79	2034.02	1951.59	1692.95	1611.41	1634.65	1709.52	1822.21	1407.78
Fam199x	528.097	-0.395303	0.107682	-3.67104	0.000241563	0.00201841	560.465	699.695	539.484	594.901	563.191	638.184	488.224	486.886	389.495	528.179	357.22	491.235
Tmem101	711.899	-0.279161	0.07605	-3.67076	0.000241834	0.00201943	799.912	766.806	794.615	690.132	775.225	855.661	649.874	685.511	642.403	625.989	548.519	708.144
Ptch1	709.434	-0.407513	0.11102	-3.67064	0.00024194	0.00201943	888.06	690.374	846.315	728.93	967.146	733.152	694.655	559.206	593.936	643.378	481.174	686.878
Anapc7	1773.43	0.205795	0.0560748	3.67001	0.000242536	0.00202334	1661.66	1702.63	1658.91	1515.47	1607.44	1736.01	1724.62	1881.34	1988.01	1885.58	2042.79	1876.69
Stc2	1647.48	-1.20936	0.329631	-3.66883	0.000243666	0.0020317	1514.31	2526.61	2425.43	2653.54	2493.29	2188.06	731.79	1347.59	1053.05	1371.53	1183.9	280.706
Cep170b	9508.06	-0.374599	0.102111	-3.66854	0.000243937	0.00203289	9644.99	10760.1	11062.8	10401.4	10864	11679.2	6364.39	10746.1	7717.64	8133.51	8297.08	8425.43
Rab5b	4969.59	-0.16808	0.0458286	-3.66757	0.000244867	0.00203957	5483.61	5179.36	5176.8	4875.6	5533.85	5302.06	4762.1	4693.66	4781.45	4785.12	4350.09	4711.39
Ankrd39	200.726	-0.350235	0.0955137	-3.66686	0.00024555	0.00204419	247.341	210.654	251.759	209.274	221.253	211.778	196.6	163.993	176.242	174.973	186.418	158.429
Tmem50a	2394.15	-0.285542	0.0778898	-3.66598	0.000246396	0.00205016	2810.22	2470.06	2762.61	2251.45	2943.34	2545.14	2032.63	2167.56	2367.81	2297.47	1918.84	2162.71
Pigu	1266.88	-0.181129	0.0494118	-3.66571	0.000246653	0.00205123	1314.33	1331.66	1316.12	1356.75	1450.72	1307.71	1210.18	1156.1	1253.96	1142.21	1198.54	1164.29
Slc39a7	248.546	-0.443776	0.121077	-3.66523	0.000247117	0.00205401	273.654	302	271.99	339.776	227.12	304.847	207.523	232.239	182.411	184.754	260.595	195.643
Prkacb	17455	-0.216738	0.0591374	-3.66498	0.000247354	0.0020549	19086.1	19725.1	18303.1	17084	18402.6	19976.5	16133.2	16746.6	15683.8	17148.4	14290.8	16879.6
Atg4b	3086.24	0.200337	0.0546664	3.66472	0.000247614	0.00205514	2826.01	2778.27	3006.5	2653.54	3082.46	2886.07	3426.31	3010.95	3456.11	3194.07	3318.44	3396.11
Psrc1	189.309	0.500214	0.136496	3.66469	0.000247641	0.00205514	130.249	169.642	166.341	174.003	142.474	157.647	199.877	220.015	225.59	255.395	275.235	155.239
Yod1	501.04	0.507747	0.138557	3.66452	0.000247798	0.00205537	447.319	467.913	323.69	393.857	326.014	522.323	555.942	606.061	497.884	670.548	482.15	718.777
Pdlim3	180.899	-1.01723	0.277611	-3.66424	0.000248071	0.00205647	174.981	341.148	171.96	278.639	203.654	282.055	62.2568	204.737	105.745	148.89	142.498	54.2272
Lman1	1547.08	0.234026	0.0638696	3.66412	0.00024819	0.00205647	1357.75	1433.57	1381.3	1461.39	1398.76	1495.74	1738.82	1683.73	1669.89	1825.8	1420.1	1698.06
Rnf169	1374.37	0.408459	0.111518	3.66272	0.000249553	0.00206668	1122.25	1314.88	1067.73	1178.05	1136.44	1264.97	1377.3	1591.04	1512.16	1318.27	1456.21	2153.14
Arhgap15	26.5599	0.943363	0.257612	3.66196	0.000250295	0.00207175	21.0503	11.8066	15.7349	27.041	13.4093	21.8426	40.4123	35.6507	38.7733	29.3433	25.3763	38.2781
Trib3	171.221	-0.910895	0.248853	-3.66038	0.000251843	0.00208347	185.506	225.568	284.353	264.531	222.93	158.596	110.315	131.398	112.795	165.192	155.186	38.2781
Rabgap1	5177.4	0.156853	0.0428553	3.66005	0.000252162	0.00208503	4574.5	5237.15	4985.73	4889.71	4861.71	4819.62	5634.79	5301.76	5558.68	5427.41	5271.44	5566.27
Spopl	895.765	0.408399	0.1116	3.6595	0.000252711	0.00208848	795.965	754.999	703.577	786.539	762.654	813.875	1176.33	885.155	807.189	1297.62	888.171	1077.1
BC003965	1160.49	0.322518	0.0881396	3.65917	0.000253034	0.00209006	1182.77	933.341	1071.1	1053.42	938.651	1013.31	1443.92	1122.49	1235.46	1415	1383.99	1132.39
Prdm2	2434.43	0.277298	0.0758045	3.65807	0.000254124	0.00209797	1916.9	2506.72	2096.12	2150.34	2170.63	2359.95	2413.82	2836.77	2715.01	2501.78	2603.02	2942.09
Ankrd34b	511.416	-0.504159	0.137847	-3.65739	0.000254796	0.00210243	626.247	624.506	575.449	557.279	558.162	656.228	476.21	447.161	390.376	542.307	256.691	426.375
Nipal2	137.448	-0.431668	0.118083	-3.65563	0.000256549	0.0021158	143.405	159.078	144.986	176.354	157.559	165.244	133.251	126.305	122.488	126.067	106.385	88.2522
Cep97	405.372	-0.352464	0.0964613	-3.65394	0.000258249	0.0021276	421.006	468.535	465.305	470.278	397.251	504.28	339.682	365.674	348.959	432.541	294.756	356.199
Ret	522.174	-0.382811	0.104765	-3.654	0.000258183	0.0021276	488.104	634.448	618.158	547.873	620.18	635.335	353.881	551.057	459.111	472.752	457.75	427.438
Rabggta	1150.38	-0.217594	0.0595683	-3.65285	0.000259341	0.00213549	1159.08	1284.43	1227.33	1194.5	1288.97	1264.97	986.279	1139.8	1098.87	997.671	1141.93	1020.75
Dop1b	2940.49	-0.372484	0.101991	-3.65214	0.00026006	0.00214031	2893.1	3977.57	3297.59	3028.59	3452.06	3255.5	1990.03	3006.88	2585.47	2524.61	2454.67	2819.82
Hlcs	381.245	0.432643	0.118509	3.6507	0.000261526	0.00215125	307.861	408.259	301.212	277.464	295.005	353.281	428.152	459.384	419.456	349.945	441.158	533.766
Tex2	3775.27	0.220595	0.0604372	3.64999	0.000262252	0.00215611	3037.82	3824.71	3449.32	3468.3	3455.41	3679.06	3826.06	4164	3982.19	4180.87	3943.09	4292.46
Galnt14	488.268	0.490959	0.134515	3.64984	0.000262407	0.00215627	427.585	320.02	422.596	440.885	469.326	358.029	629.121	480.775	586.005	408.632	702.729	613.512
Doc2b	1748.43	0.571103	0.15648	3.64968	0.000262565	0.00215646	1434.05	1343.46	1591.48	1182.75	1475.02	1414.07	1860.06	1767.25	2159.85	1668.22	1684.6	3400.37
Chmp2b	2477.41	0.259082	0.0710376	3.64711	0.000265203	0.002177	2312.9	2215.91	2082.63	2339.63	2186.55	2395.09	2838.69	2504.71	2589	2938.67	2340.48	2984.63
Slc8a3	1487.17	0.257349	0.0705716	3.64663	0.0002657	0.00217995	1486.68	1293.13	1311.62	1261.52	1433.96	1342.85	1822.92	1465.75	1475.15	1624.75	1716.81	1610.87
Obscn	61.7244	-0.695964	0.190913	-3.64546	0.000266917	0.0021888	57.8884	80.1604	77.5508	62.3118	90.5128	88.3201	42.5968	51.9481	42.2981	30.43	50.7526	65.9233
Zfp609	2272.94	-0.349928	0.0960122	-3.64462	0.000267786	0.00219479	2151.08	3005.08	2568.17	2461.9	2588.83	2504.3	1725.71	2262.29	1973.03	1882.32	1802.69	2349.85
Rad51c	182.213	-0.443058	0.12166	-3.64179	0.000270752	0.00221796	167.087	218.111	221.413	221.03	215.387	215.577	156.188	167.049	157.737	180.407	158.114	108.454
Zfp874a	534.981	-0.485309	0.133276	-3.6414	0.000271163	0.00222018	657.823	504.576	708.072	737.16	664.599	474.839	493.685	396.232	475.854	523.831	446.038	337.06
Med22	1466.14	-0.267073	0.0734316	-3.63703	0.000275796	0.00225695	1706.39	1453.45	1689.26	1737.68	1572.24	1455.86	1353.27	1315	1419.63	1360.66	1394.72	1135.58
Lcor	554.274	0.329076	0.0904882	3.63668	0.000276178	0.00225891	469.685	559.88	506.89	473.805	445.859	488.135	678.271	576.522	534.895	579.258	612.936	725.156
Lrrc42	784.135	0.238432	0.0655736	3.6361	0.0002768	0.00226284	676.242	647.497	777.756	710.119	782.768	724.605	862.857	802.649	903.241	849.867	850.107	821.915
Fra10ac1	530.074	0.259263	0.0713127	3.63558	0.000277355	0.0022662	515.733	453.621	527.121	497.318	449.212	458.695	598.539	538.834	628.303	544.48	563.159	585.867
Gaa	7964.55	-0.417367	0.114812	-3.63524	0.000277725	0.00226806	7883.35	10194	8884.62	8709.54	8589.5	10388.5	5599.83	8837.29	6036.29	7624.9	7024.36	5802.32
Lhpp	1318.81	-0.23571	0.0648761	-3.63323	0.000279891	0.00228458	1530.1	1263.3	1471.22	1408.48	1527.82	1362.79	1217.83	1146.93	1333.27	1195.47	1181.95	1186.62
Laptm4a	5481.61	0.259878	0.0715363	3.63282	0.000280344	0.0022871	5342.84	4658.63	5093.63	5355.29	4766.17	4723.7	6925.8	5197.87	6085.64	5775.19	5825.82	6028.79
Snu13	1873.58	-0.327142	0.09006	-3.63249	0.000280696	0.0022888	2365.53	1751.1	2204.02	2129.18	2172.31	1892.71	1896.1	1401.58	1737.75	1673.65	1711.93	1547.07
Alkbh6	574.398	-0.378946	0.104367	-3.63091	0.000282426	0.00230172	701.239	585.357	692.337	671.321	636.104	612.543	566.864	518.462	471.448	482.533	585.607	368.958
Sirt5	334.159	-0.31032	0.0855182	-3.62871	0.000284845	0.00232024	377.59	354.197	368.647	367.992	348.642	404.563	312.376	284.187	333.979	322.776	284.02	250.934
Basp1	27422	0.28107	0.0774904	3.62716	0.000286561	0.00233303	25891.9	24890.1	22711.1	26106.3	25450	23505.5	30267.7	28100.9	26392.3	32724.2	35489.8	27533.6
Eri1	845.514	0.277303	0.0764586	3.62684	0.000286912	0.00233468	780.178	742.571	796.862	771.255	729.969	767.341	1010.31	810.798	954.351	1055.27	814.97	912.294
Zfp92	74.4083	-1.05403	0.290832	-3.62417	0.000289887	0.00235769	61.8353	134.843	85.4183	116.394	112.303	91.1692	38.2279	78.4314	38.7733	63.0336	57.5847	14.8859
Paxip1	1309.28	0.211569	0.0583838	3.62377	0.000290345	0.0023602	1215.66	1212.97	1209.34	1269.75	1229.47	1144.36	1442.83	1289.54	1406.41	1307.4	1425.95	1557.7
Adam9	1539.69	-0.376757	0.103994	-3.62289	0.000291332	0.00236702	1443.26	2094.73	1570.12	1801.16	1614.14	1910.75	1131.54	1577.8	1326.22	1454.12	1313.71	1238.72
Cert1	1973.98	0.261478	0.0721939	3.62188	0.000292465	0.00237328	1749.81	1997.8	1673.52	1792.93	1556.32	1999.07	2163.7	2241.92	2011.8	2136.62	2063.29	2300.94
Mfsd12	1470.65	-0.221401	0.0611278	-3.62194	0.000292401	0.00237328	1618.24	1413.06	1765.69	1500.19	1671.13	1535.63	1311.76	1406.67	1359.71	1361.74	1355.68	1348.24
Rtkn	87.4009	-0.666594	0.18405	-3.62181	0.000292551	0.00237328	114.461	88.2386	111.269	99.934	117.331	112.062	89.5624	74.3571	63.4472	85.8562	38.0645	54.2272
Xrn2	2880.32	0.223893	0.0618495	3.61996	0.000294647	0.00238906	2779.96	2731.05	2536.7	2655.89	2574.59	2664.8	3018.91	2875.48	3092.17	3188.63	2865.57	3580.06
Wdr53	295.159	0.323239	0.0893035	3.61955	0.000295114	0.00239041	290.758	236.753	267.494	253.95	240.529	287.753	357.157	282.149	342.791	315.168	336.724	330.68
Syndig1	815.25	0.331439	0.0915667	3.61965	0.000295002	0.00239041	685.451	736.357	709.196	600.78	850.653	745.498	924.022	781.259	954.351	962.893	826.682	1005.86
Rfwd3	807.054	0.259457	0.0716971	3.6188	0.000295973	0.00239614	702.555	727.036	748.534	787.715	799.53	641.983	938.221	808.761	898.835	892.252	812.042	927.18
Homer1	3775.64	0.276254	0.0763591	3.61782	0.000297093	0.00240399	3082.56	3876.28	3240.27	3770.45	3164.6	3352.37	4125.33	4170.11	3727.52	4711.22	4047.52	4039.4
Tpm1	4612.19	-0.12729	0.0351944	-3.61678	0.000298296	0.00241128	4816.58	4841.32	4756.45	4852.09	4818.13	4808.22	4529.45	4454.29	4412.22	4466.69	4476.97	4113.83
Lrrn3	4612.41	-0.272828	0.075434	-3.61677	0.000298298	0.00241128	5538.87	4940.74	4931.78	4850.91	5057.82	4963.97	4428.97	4090.66	4301.19	4266.73	3346.75	4630.58
Sugp2	5836.25	0.179964	0.0497695	3.61595	0.000299251	0.00241775	5395.46	5573.32	5475.76	5262.41	5631.91	5494.84	5739.64	6151.27	6178.17	5857.78	6487.55	6786.91
Slc19a2	490.194	0.381133	0.105408	3.61579	0.000299432	0.00241799	313.124	503.333	441.702	399.736	441.669	450.148	515.53	532.723	576.312	523.831	645.144	539.083
Tomm40	2252.27	-0.233865	0.064684	-3.6155	0.000299763	0.00241943	2405	2506.1	2298.43	2566.54	2225.11	2604.97	2062.12	2305.07	1914.87	1969.26	2193.1	1976.64
Nek1	1998.24	-0.198361	0.0548704	-3.61508	0.000300259	0.0024222	2018.2	2187.32	2118.6	2155.05	2247.73	2079.8	1915.76	1940.41	1779.16	1996.43	1679.72	1860.74
Smpd3	9346.38	0.309078	0.0855119	3.61445	0.000300991	0.00242687	7521.54	9081.74	8620.5	7484.47	8618.83	8762.69	8927.84	10982.4	10189.4	9451.79	10068.5	12446.7
Crb3	47.4487	1.0187	0.281912	3.61354	0.000302045	0.00243413	36.8381	31.0699	46.0809	31.7437	25.1424	18.0439	60.0723	49.9109	52.8726	114.113	67.3448	36.1515
Eci2	432.616	-0.340291	0.094191	-3.61277	0.000302939	0.00243887	538.099	443.679	539.484	469.102	480.221	432.104	394.293	365.674	393.901	448.843	319.156	366.831
Ccdc73	285.977	-0.419466	0.116103	-3.61288	0.00030282	0.00243887	373.643	303.243	322.566	309.207	343.613	311.495	289.439	255.666	231.758	232.572	175.682	282.832
Ttc38	117.908	-0.433378	0.120018	-3.61093	0.000305103	0.00245504	146.037	139.815	128.127	114.042	130.741	153.848	97.208	115.101	108.389	101.071	85.8891	94.6319
Acss2	1437.89	-0.177875	0.0492811	-3.60939	0.00030692	0.00246841	1535.36	1486.39	1534.16	1513.12	1535.37	1555.57	1379.48	1317.04	1429.32	1415	1238.56	1315.28
Mob4	3840.58	0.351834	0.0975429	3.60697	0.000309791	0.00249024	3948.25	2979.61	3299.84	3484.76	3405.96	3132.04	5238.31	3594.6	3968.09	4649.28	3899.17	4487.04
Trmt6	727.757	-0.320492	0.0888618	-3.60664	0.000310193	0.00249222	802.544	831.431	719.312	764.201	784.444	944.931	731.79	733.385	579.837	604.254	590.487	646.474
Zfp46	3560.26	0.276435	0.0766612	3.60593	0.000311042	0.00249777	3165.44	3518.36	3120.01	3048.57	3071.57	3394.15	3602.16	3876.75	3914.34	3552.71	3714.7	4744.35
Tbc1d10b	2267.25	-0.241204	0.0669092	-3.60494	0.00031223	0.00250604	2365.53	2588.13	2387.22	2245.58	2575.42	2572.68	1812	2306.09	2037.36	2056.2	2209.69	2051.07
Spats2	1366.91	-0.254221	0.0705234	-3.60478	0.000312419	0.0025063	1344.59	1547.28	1552.14	1381.44	1607.44	1485.3	1194.89	1308.89	1327.98	1343.27	1091.18	1218.52
Inpp5d	135.419	0.593643	0.164767	3.60291	0.000314673	0.00252183	142.09	130.494	85.4183	106.988	90.5128	92.1189	228.275	149.733	149.806	141.282	166.898	141.416
Armc10	1107.15	0.303796	0.084318	3.60298	0.000314596	0.00252183	943.318	963.789	1084.59	986.407	1035.87	932.585	1208	1171.38	1346.49	1091.13	1068.73	1453.5
Supt16	2322.54	0.215085	0.0597021	3.60264	0.000315006	0.00252323	2069.51	2283.64	2108.48	2022.19	2247.73	2160.52	2393.06	2582.13	2458.58	2395.28	2332.67	2816.63
Tmem200c	190.888	0.672312	0.186665	3.60171	0.00031613	0.00253095	161.824	147.271	200.059	112.867	139.96	121.559	209.707	189.458	209.728	206.49	207.891	383.844
Mtcp1	121.933	0.511956	0.142159	3.60129	0.000316646	0.0025338	118.408	70.8394	86.5422	110.515	107.274	112.062	160.557	138.528	120.726	152.15	135.666	149.922
6330403K07Rik	4691.22	0.376489	0.104585	3.59982	0.000318438	0.00254471	4752.11	3478.59	4149.53	3561.18	4843.27	3712.29	6044.37	4413.55	5227.34	5371.99	4896.65	5843.78
Cyb561d1	444.555	0.353282	0.0981385	3.59983	0.000318428	0.00254471	369.696	443.057	341.673	379.749	368.756	435.903	475.118	497.072	493.478	441.236	474.342	614.575
Zfp932	690.204	0.467461	0.129858	3.59978	0.000318489	0.00254471	648.613	465.428	646.257	560.806	615.152	542.267	989.555	554.113	832.744	766.185	743.721	917.61
Kcnk10	723.657	-0.402292	0.111764	-3.59949	0.000318846	0.00254628	611.775	945.769	905.883	895.879	754.273	828.12	522.083	744.589	642.403	592.299	618.792	622.018
Slc26a11	102.031	-0.484463	0.134683	-3.59706	0.00032184	0.00256761	111.83	114.959	134.871	125.799	120.684	107.314	68.8101	82.5058	101.339	68.4676	87.8411	99.9483
Dnd1	45.964	-0.801191	0.222733	-3.59709	0.000321794	0.00256761	60.5197	55.3045	61.8158	70.5416	38.5517	64.5782	38.2279	40.7436	28.1987	23.9093	46.8486	22.3289
Pcdhga5	390.911	0.33394	0.0928619	3.59609	0.000323035	0.00257584	318.386	362.275	337.177	337.424	358.699	358.979	380.094	455.31	445.011	385.809	414.805	536.956
Hbegf	701.648	-0.28692	0.0797973	-3.59561	0.000323633	0.00257932	853.854	686.645	799.11	721.876	846.462	720.806	700.116	598.931	604.511	685.763	592.439	609.259
Ldhb	7685.77	-0.302226	0.0840964	-3.59381	0.000325882	0.00259575	8343.82	8608.23	8091.13	8466.17	8778.06	8639.23	7072.15	7641.46	7143.98	7485.79	6784.26	5174.98
Mocs3	261.849	0.315809	0.0878785	3.5937	0.000326021	0.00259575	231.554	240.481	237.148	196.341	243.882	247.866	293.808	257.703	280.225	298.866	324.036	290.275
Slc7a3	2003.77	-0.893409	0.248661	-3.59288	0.000327048	0.00260131	2094.51	2753.42	2697.42	3018.01	2668.45	2398.89	1228.75	1567.61	1559.74	1900.79	1614.32	543.336
Spon1	648.28	0.989709	0.275459	3.59294	0.000326967	0.00260131	563.096	381.539	410.232	269.234	467.649	513.776	939.313	601.987	741.979	722.713	572.919	1594.92
Sar1a	5480.37	-0.177517	0.0494219	-3.59187	0.000328314	0.00261008	5515.18	5989.66	5871.38	5870.24	5921.88	5732.26	4895.35	5446.4	5358.64	5364.38	5114.3	4684.81
Cdkn1c	81.6876	-0.696362	0.193899	-3.59137	0.000328945	0.00261248	90.7795	60.2757	116.888	105.812	137.445	95.9176	52.4268	49.9109	66.0908	66.294	69.2969	69.1132
[truncated: 28,085 more rows]

## Sheet: shChd8
Gene	baseMean	log2FoldChange	lfcSE	stat	pvalue	padj	Luc_1.WTF	Luc_2.WTF	Luc_3.WTF	Luc_1.WTM	Luc_2.WTM	Luc_3.WTM	Chd8_1.WTF	Chd8_2.WTF	Chd8_3.WTF	Chd8_1.WTM	Chd8_2.WTM	Chd8_3.WTM
Azin1	6503.81	-1.74567	0.0513966	-33.9647	7.39706e-253	1.3027e-248	10464.9	9617.88	10295	9573.8	10668	9503.39	2784.21	3184.33	2916.73	3001.32	3111.91	2924.33
Xkr4	3683.63	-1.46619	0.044278	-33.1133	1.9128e-240	1.68432e-236	5108.46	5382.7	5551.75	5408	5604.98	5396.17	2037.39	2055.37	1903.69	1992.14	1843.9	1919.06
Lin7c	5697.54	-2.17585	0.0755927	-28.7838	3.42327e-182	2.00957e-178	9781.28	9385.14	8818.72	9313.44	9748.81	8937.56	1799.36	2450.59	1970.54	2035.83	2255.88	1873.32
Hras	3116.06	-2.36179	0.0834925	-28.2874	4.9365e-176	2.17342e-172	5901.65	4540.32	5256.03	5387.31	5430.72	4790.77	862.559	1105.56	1061.06	1055.05	1092.81	908.925
Slc22a17	10687.1	-1.4563	0.0525061	-27.7358	2.58383e-169	9.10078e-166	16955.6	14786.6	16013.3	15373.6	15574.2	15296.2	5308.56	6148.09	5874.89	5342.95	5706.91	5864.22
Necab2	1185.24	-2.15245	0.0791993	-27.1777	1.19175e-162	3.49797e-159	2191.88	1816.65	1804.82	1778.74	1899.4	2120.88	418.177	460.949	386.01	434.688	424.115	486.577
Nono	5121.49	-1.13792	0.0466123	-24.4124	1.26161e-131	3.17404e-128	7038.69	7154.74	6968.14	6926.37	7308.34	6860.21	2932.7	3453.52	3151.16	3344.26	3189.1	3130.64
Chd8	2762.13	-1.6304	0.0673416	-24.2108	1.71071e-129	3.76591e-126	3737.16	4666.39	3961.68	4181.62	4088.94	4413.88	1365.9	1489.98	1335.97	1328.09	1220.31	1355.6
Qdpr	1148.17	-2.20874	0.0939861	-23.5007	4.00822e-122	7.8432e-119	1982.28	1727.43	1935.07	1944.2	1875.88	1866.65	363.585	462.75	413.314	394.278	494.367	318.221
Hsdl1	3092.33	-1.49738	0.0644958	-23.2167	3.08792e-119	5.43814e-116	4693.37	4308.23	4788.98	4383.58	4852.19	4380.25	1449.97	1740.26	1743.64	1590.22	1706.87	1470.44
Pgap2	495.6	-1.73275	0.0748621	-23.1458	1.60104e-118	2.56327e-115	745.24	730.537	766.284	764.055	745.82	823.027	212.91	232.275	256.085	198.777	245.449	226.745
Fech	800.193	-1.86498	0.0806016	-23.1383	1.90781e-118	2.79988e-115	1205.54	1313.67	1242.72	1181.36	1243.32	1349.29	300.258	373.621	350.234	292.705	348.659	400.939
Atxn7l3	5210.07	-1.39726	0.060552	-23.0753	8.18975e-118	1.10946e-114	7397.61	7536.17	7935.09	7414.25	7644.66	7392.41	2473.03	3099.7	3075.84	2872.44	2995.69	2683.96
Cbx5	9065.92	-1.32379	0.0578688	-22.8757	8.11491e-116	1.0208e-112	12696.5	13525.9	13094.9	12020.5	13776.8	12623.4	4609.78	5676.34	5291.17	5009.84	5345.24	5120.73
Lpgat1	3785.72	-1.94662	0.0853707	-22.8019	4.38606e-115	5.14953e-112	5587.93	6944.63	5527.1	5670.79	6075.47	6265.69	1417.22	1907.72	1479.08	1411.1	1590.65	1551.21
Fktn	1542.29	-1.40153	0.0639202	-21.9262	1.46169e-106	1.60886e-103	2171.33	2510.98	2214.36	2075.6	2172.99	2278.16	878.937	923.699	813.446	773.265	849.965	844.697
Tubb4a	7512.16	-2.5976	0.118563	-21.909	2.13071e-106	2.20729e-103	12166.3	14299.8	12035.2	12429.3	12477.7	13957.8	1476.18	2862.93	2138.12	2126.48	1974.87	2201.27
Ocrl	1976.53	-1.50691	0.070441	-21.3925	1.56894e-101	1.53503e-98	2819.31	3147.77	2782.33	3058.65	2896.15	2843.01	874.569	1184.78	1018.69	996.07	1077.2	1019.86
Mindy2	2549.86	-1.38807	0.0665194	-20.8672	1.06379e-96	9.86021e-94	3709.76	4052.22	3469.99	3618.31	3573.14	3715.49	1476.18	1526.89	1377.4	1345.57	1516.93	1216.44
Mmab	1512.88	-1.28033	0.0617278	-20.7415	1.46147e-95	1.2869e-92	2348.05	2089.47	2147.47	2081.68	2150.33	2047.68	766.476	884.086	932.074	908.695	940.165	858.321
Igdcc4	1194.29	-2.05557	0.101595	-20.233	5.0136e-91	4.2045e-88	1837.07	1905.86	2032.47	1719.12	2166.89	1893.36	371.228	467.251	501.814	456.532	582.833	397.047
Elavl3	12639.9	-1.35509	0.0685988	-19.7538	7.43587e-87	5.95241e-84	17441.9	19244.2	17278.4	17741.2	18370.2	18975.1	6047.74	8257.48	7095.06	6995.42	6954.97	7277.24
Ulk2	6324.37	-0.933379	0.0483234	-19.3153	3.9977e-83	3.06102e-80	7986.67	8759.33	8310.61	8110.17	8436.65	8206.53	3964.5	4637.4	4565.28	4261.69	4391.2	4262.41
Cygb	739.308	-2.46526	0.127743	-19.2986	5.51937e-83	4.05007e-80	1485	1139.77	1307.26	1037.8	1359.2	1184.09	211.818	249.381	196.771	240.28	294.886	165.436
Tarsl2	1116.74	-1.61478	0.0857355	-18.8345	3.9394e-79	2.77507e-76	1565.83	1766.22	1671.04	1659.51	1680.71	1759.81	453.116	632.005	538.532	603.977	601.047	469.06
Rgs8	2054.23	-1.59364	0.0852874	-18.6855	6.498e-78	4.40139e-75	3304.26	3090.88	2925.49	3087.85	2934.49	3173.4	1068.92	927.3	819.095	1051.77	1228.98	1038.35
Myo9a	5242.4	-1.3595	0.0747966	-18.176	7.9948e-74	5.21468e-71	6894.84	8301.62	7640.55	7368.02	7851.15	7211.38	2578.94	3371.59	3050.42	2934.69	3085.89	2619.73
Pank3	4266.49	-1.15705	0.0636995	-18.1641	9.92695e-74	6.2437e-71	5993.43	6175.95	5671.44	5656.19	5895.99	5953.1	2834.43	2884.53	2407.39	2358.02	2516.07	2851.34
Kif1b	23767.6	-1.68024	0.0927363	-18.1185	2.27645e-73	1.38244e-70	30996	43607.2	34506.3	34371.5	35266.1	38633.8	9825.53	13784.4	11039	10996.1	11073	11112.4
Impa1	984.912	-1.51883	0.0851598	-17.835	3.77945e-71	2.21866e-68	1563.09	1360.22	1455.12	1652.21	1406.25	1328.52	471.678	541.976	550.771	511.141	558.548	419.429
Marchf8	2627.55	-1.099	0.0620258	-17.7184	3.0257e-70	1.71889e-67	3607.02	3674.67	3724.64	3731.46	3598.41	3163.51	1498.01	1748.37	1756.82	1565.1	1753.7	1708.86
Pcmt1	3497.83	-1.38985	0.0791236	-17.5656	4.51865e-69	2.48681e-66	5235.86	4791.16	5071.79	5146.42	5408.07	4730.43	1702.19	2172.4	1990.31	2015.08	2108.43	1601.81
Tspyl5	2041.07	-0.885336	0.0505906	-17.5	1.43226e-68	7.64349e-66	2604.23	2556.23	2667.33	2810.46	2782.88	2471.06	1407.39	1381.05	1462.13	1476.63	1501.32	1372.15
Pcdh10	6362.87	-1.07282	0.0618528	-17.3448	2.16012e-67	1.11888e-64	8586.7	9562.92	7740.29	8823.13	8240.61	8796.1	4114.08	4441.14	3682.16	4077.11	4131.87	4158.29
Fgf12	3781.82	-1.6395	0.0946691	-17.3182	3.42996e-67	1.72586e-64	5579.71	6093.84	5423.84	6107.57	5192.86	5959.03	1516.57	2221.02	1704.09	1961.56	2044.25	1577.48
Tmem260	427.947	-1.52109	0.0880929	-17.2669	8.35114e-67	4.08533e-64	598.658	641.967	614.905	596.157	676.117	680.58	243.482	226.874	221.25	168.196	230.705	236.476
B4galt5	1524.57	-1.38151	0.0801894	-17.2281	1.63324e-66	7.77378e-64	2306.96	2264.02	2364.57	1861.47	2214.81	2210.9	730.445	966.013	914.186	812.583	849.965	798.959
Pno1	759.847	-1.64227	0.0957772	-17.1468	6.63934e-66	3.07698e-63	1324.72	975.558	1166.44	1328.58	1163.17	950.636	381.054	381.724	364.356	353.867	381.617	346.443
Knop1	1606.37	-1.10685	0.0646894	-17.1103	1.24386e-65	5.61681e-63	2198.73	2284.71	2040.69	2154.68	2195.64	2288.06	1023.06	1080.35	1002.69	951.29	906.34	1150.27
Clcn3	6407.36	-1.59154	0.0933071	-17.057	3.09888e-65	1.36436e-62	9659.36	10379.4	9128.52	9922.98	9564.97	9078.03	2678.3	3927.97	3153.99	3434.91	3354.76	2605.13
Lasp1	4324.17	-1.09364	0.0641298	-17.0535	3.29349e-65	1.41467e-62	5645.47	5991.7	6076.29	5145.2	6348.18	6126.21	2434.82	2811.61	2906.38	2732.64	2862.99	2808.52
Ap3s2	3501.75	-1.02018	0.0599435	-17.0191	5.92984e-65	2.48644e-62	4776.94	4690.31	4839.44	4704.78	4562.05	4576.11	1998.08	2585.64	2411.15	2235.7	2377.3	2263.56
Cfap57	248.028	1.80908	0.106419	16.9995	8.27768e-65	3.39019e-62	86.3054	119.601	104.44	102.198	121.109	121.673	390.881	361.017	446.266	362.604	405.034	355.201
Med9	838.604	-1.45742	0.0867048	-16.8089	2.09918e-63	8.40195e-61	1212.39	1201.18	1288.48	1226.38	1135.28	1315.66	343.932	518.568	469.803	477.283	435.39	438.892
Gm2115	299.541	-2.42942	0.145603	-16.6853	1.67748e-62	6.5649e-60	482.214	514.608	438.883	705.655	429.544	461.964	88.4396	105.334	101.681	70.9918	83.2619	111.913
Abcd3	2147.75	-1.26699	0.076304	-16.6044	6.47233e-62	2.47792e-59	2964.52	3253.15	2872.69	2857.9	3088.71	3172.41	1091.85	1421.56	1262.54	1096.55	1376.42	1314.73
Sidt2	3284.97	-1.22514	0.0741114	-16.531	2.19498e-61	8.22465e-59	4215.27	5159.01	4406.43	4634.21	4315.48	4877.82	1702.19	2226.42	2020.44	2034.73	1871.66	1956.04
Vps35	8506.77	-1.41838	0.0859308	-16.5061	3.31721e-61	1.21707e-58	13485.6	10550.1	13516.2	13369.7	12852.3	10517.3	4642.53	4308.8	4870.32	4693.1	5174.38	4100.87
Nkiras2	3187.75	0.843781	0.0512929	16.4502	8.35341e-61	3.00229e-58	2404.22	2172.22	2388.04	2276.35	2294.96	2157.48	4169.76	3725.41	4184.92	4332.68	4077.23	4069.73
Vrk3	969.839	1.2739	0.0776023	16.4157	1.4763e-60	5.19982e-58	557.56	580.551	518.679	519.508	575.048	648.925	1498.01	1338.73	1331.27	1304.06	1235.92	1529.8
Rasgef1a	1655.88	-1.00739	0.0615453	-16.3683	3.21845e-60	1.11137e-57	2365.86	2123.73	2261.3	2064.65	2268.83	2188.14	1076.56	1070.45	1073.3	1011.36	1111.03	1255.37
Mpzl3	287.904	2.05963	0.125983	16.3485	4.46001e-60	1.51049e-57	136.993	95.0345	98.5726	111.932	106.297	122.663	562.301	379.923	434.026	531.893	419.779	455.436
Khsrp	2379.83	-1.10792	0.0678346	-16.3326	5.78364e-60	1.92181e-57	3157.68	3594.5	3117.94	3092.72	3127.91	3415.76	1333.14	1700.65	1466.84	1477.72	1476.16	1596.95
Cacnb1	2775.54	-1.16732	0.0716329	-16.2958	1.05651e-59	3.44559e-57	3685.1	3937.79	3944.08	3662.11	3834.53	3982.58	1407.39	1853.7	1842.49	1845.79	1728.55	1582.35
Tollip	3039.02	-1.55954	0.0967837	-16.1137	2.04554e-58	6.54983e-56	4178.28	4976.06	4483.88	4491.86	4454.88	4646.34	1203.22	1978.84	1573.23	1494.1	1435.4	1552.18
Zbtb4	2942.35	-1.61766	0.100437	-16.1062	2.30874e-58	7.26059e-56	4172.8	4623.72	4466.28	4782.64	4311.99	4274.4	1075.47	1711.45	1527.1	1630.63	1490.04	1241.74
Ahcyl2	2530.38	-1.39309	0.0869435	-16.0229	8.83735e-58	2.73043e-55	3285.09	4074.84	3527.49	3536.79	3662.88	3903.44	1220.68	1638.53	1392.46	1491.92	1459.68	1170.7
Svop	4729.6	-1.0773	0.0674651	-15.9683	2.12469e-57	6.45138e-55	6457.84	6299.43	6582.07	5923.86	6582.56	6663.35	2517.8	3336.48	3236.84	3023.16	3006.1	3125.77
Cd99l2	4806.6	-1.00177	0.0629857	-15.9047	5.8814e-57	1.75555e-54	6966.08	6144.92	6253.49	6145.29	6755.94	6207.33	2750.36	3426.51	3297.09	3261.25	3361.7	3109.23
Amfr	5138.53	-0.772333	0.0487939	-15.8285	1.97987e-56	5.81124e-54	6567.43	6539.28	6508.14	6455.53	6442.28	6382.42	3395.64	4154.85	3780.08	3890.35	3735.51	3810.87
Cdc42se1	3164.33	0.879338	0.0557311	15.7782	4.39421e-56	1.26863e-53	2037.08	2468.96	2115.79	2224.03	2173.86	2341.47	3990.7	4186.36	4072.88	4337.05	3914.18	4109.63
Nedd8	2799.34	-1.57429	0.0998723	-15.763	5.59202e-56	1.58841e-53	4823.51	3389.56	4347.75	4625.69	4156.03	3809.47	1183.56	1401.75	1446.13	1435.13	1686.92	1286.51
Slc39a6	3490.49	-2.10668	0.135194	-15.5826	9.5545e-55	2.67086e-52	5307.1	6276.8	5144.55	5763.26	5535.27	5967.94	942.264	1959.93	1247.47	1307.34	1339.13	1094.8
C1qtnf1	251.12	1.97613	0.127299	15.5235	2.40465e-54	6.61692e-52	121.924	89.216	96.2256	82.732	108.911	112.771	446.565	327.706	375.654	465.269	349.526	436.946
Npc2	3260.64	0.813405	0.0525992	15.4642	6.05184e-54	1.63968e-51	2268.6	2331.9	2433.8	2349.35	2376.87	2426.55	4543.17	3842.44	4101.13	4155.75	3907.24	4390.87
Galc	532.071	-1.27799	0.0828219	-15.4306	1.01963e-53	2.72071e-51	710.992	795.186	766.284	806.637	791.127	650.904	331.921	316.002	318.223	258.847	332.18	306.543
Pan2	1006.09	1.05853	0.0688155	15.3822	2.15577e-53	5.66646e-51	676.744	623.219	699.396	602.24	680.474	635.076	1446.7	1181.18	1441.42	1418.74	1359.94	1307.92
Kcnk2	2371.6	0.681847	0.044537	15.3097	6.59091e-53	1.70695e-50	1701.45	1912.97	1830.63	1714.26	1853.22	1904.24	2881.38	2870.13	2970.4	2921.59	2945.39	2953.52
Cdr2l	868.034	-1.58293	0.104135	-15.2008	3.49376e-52	8.9172e-50	1157.59	1361.51	1300.22	1287.21	1278.18	1425.46	338.472	508.665	429.319	492.574	483.96	353.255
Snx5	1194.53	-1.06338	0.0700923	-15.1711	5.49461e-52	1.38237e-49	1782.28	1463.66	1581.86	1794.55	1590.97	1485.8	801.415	736.439	791.792	792.924	802.263	710.402
Prr13	465.406	-1.02859	0.068136	-15.0961	1.71818e-51	4.26182e-49	641.126	589.602	606.691	632.657	609.028	671.677	286.064	323.205	299.393	294.889	303.559	326.98
Stk11ip	1987.97	0.911993	0.0604426	15.0886	1.92545e-51	4.7096e-49	1379.52	1466.89	1356.55	1429.56	1339.17	1302.8	2826.79	2441.59	2511.89	2847.32	2438.01	2515.6
Zdhhc21	2454.48	-1.46885	0.0975398	-15.059	3.01432e-51	7.27194e-49	3596.06	4149.84	3082.74	3558.69	3322.21	3927.19	1280.74	1612.42	1104.37	1179.56	1269.74	1370.2
Cbfb	1306.23	1.4869	0.0989191	15.0315	4.56704e-51	1.08689e-48	730.171	715.021	674.753	743.372	605.543	653.871	2411.89	1739.36	1615.6	1945.18	1746.76	2093.25
Mfsd14a	1105.12	-0.776766	0.0516858	-15.0286	4.76847e-51	1.1197e-48	1367.19	1369.92	1450.42	1345.61	1417.58	1425.46	816.701	832.77	811.563	760.158	877.719	786.308
Pgap3	478.897	1.30214	0.0867892	15.0035	6.96275e-51	1.61343e-48	284.945	278.638	268.728	253.063	238.732	333.366	686.772	688.723	675.989	750.329	614.056	673.422
Asb13	745.422	-0.99071	0.0661432	-14.9783	1.01831e-50	2.32902e-48	1069.91	930.95	988.073	1047.53	999.364	919.97	457.484	542.876	502.755	481.652	484.827	519.664
Wasf3	4007.06	-1.15944	0.0776108	-14.9392	1.8327e-50	4.13792e-48	5260.52	5780.29	5383.94	5450.58	5422.01	5918.48	2064.68	2995.27	2480.82	2484.71	2367.76	2475.7
Clock	1618.4	-0.991923	0.0669678	-14.8119	1.2266e-49	2.70021e-47	2068.59	2350.65	2040.69	2166.85	2067.56	2223.76	1269.82	1035.34	1007.39	1041.94	1072.86	1075.33
Susd4	2008.52	-0.597422	0.0403331	-14.8122	1.22147e-49	2.70021e-47	2424.77	2478.01	2413.85	2320.15	2379.48	2491.83	1586.45	1658.34	1560.05	1622.98	1557.69	1608.62
Tpm4	1127.35	-2.05405	0.139034	-14.7737	2.16445e-49	4.70594e-47	1530.21	1870.3	1840.02	1736.16	2057.1	1870.61	300.258	552.779	472.627	440.149	536.866	321.141
Nudt11	1113.18	-1.28188	0.087103	-14.7168	5.02621e-49	1.06647e-46	1908.31	1386.08	1530.22	1457.54	1658.93	1526.36	699.874	635.606	565.835	666.231	704.257	618.926
Ube2n	5013.66	-0.938868	0.0637944	-14.7171	5.00825e-49	1.06647e-46	6897.58	6662.11	6326.25	6397.13	6850.04	6407.15	3155.44	3892.86	3352.64	3620.58	3546.44	3055.7
Rev3l	5471.6	-0.845713	0.057598	-14.683	8.27998e-49	1.73594e-46	6692.09	7852.95	6800.33	6518.8	7403.31	6911.65	4019.09	4031.51	3653.92	3770.21	3897.7	4107.68
Edaradd	174.964	2.01531	0.137274	14.681	8.53168e-49	1.76766e-46	60.2768	58.8309	85.6643	53.5325	74.9305	83.0941	305.717	223.272	283.388	264.308	308.763	297.785
Exoc8	1265.43	-1.07741	0.0735519	-14.6482	1.38265e-48	2.83138e-46	1682.27	1810.83	1699.2	1725.21	1629.3	1755.86	768.66	916.497	757.899	769.988	729.409	940.066
Map2k1	3683.07	-1.55069	0.106521	-14.5576	5.2242e-48	1.05751e-45	5434.5	5293.48	5577.56	5106.27	5589.29	5951.12	1380.09	2250.73	1970.54	1924.42	2157.87	1560.94
Myl4	131.369	2.15275	0.147927	14.5528	5.60332e-48	1.12136e-45	54.7971	47.194	45.7658	57.1824	54.0197	31.6549	239.114	167.454	213.718	211.883	222.032	231.611
Ntn4	430.577	1.37549	0.0945481	14.548	6.01196e-48	1.18963e-45	213.709	218.515	228.829	238.463	291.881	243.347	655.108	550.979	562.069	679.337	620.995	663.691
Sox6	829.284	-1.58141	0.10889	-14.523	8.66158e-48	1.69488e-45	1149.37	1254.2	1154.71	1133.92	1351.36	1415.57	460.759	463.65	361.532	360.42	508.244	337.684
L3mbtl1	372.218	-1.33885	0.0922819	-14.5083	1.07355e-47	2.07762e-45	563.04	475.172	555.057	465.976	557.622	585.616	208.543	186.36	219.367	192.224	221.164	236.476
Pccb	1573.61	-0.918011	0.0634069	-14.4781	1.66663e-47	3.19033e-45	2189.14	1993.78	2006.66	2241.06	1879.36	2042.73	1080.93	1060.54	1108.13	998.254	1071.13	1211.58
Tm7sf2	962.874	-1.27184	0.0879123	-14.4672	1.9531e-47	3.6985e-45	1535.69	1174.68	1429.3	1233.68	1485.54	1315.66	520.811	535.674	576.191	500.219	618.393	628.657
Cnot6l	1625.83	-0.956617	0.0661771	-14.4554	2.31783e-47	4.34248e-45	2249.42	2249.15	1902.22	2103.58	2178.21	2191.11	1208.67	1173.98	984.797	1041.94	1090.21	1136.64
Fzd3	1446.78	-1.68431	0.117012	-14.3944	5.61292e-47	1.04052e-44	1867.21	2349.36	2182.68	2091.42	2192.15	2559.1	521.903	903.893	759.782	674.968	616.658	642.281
Cryz	293.771	-1.99513	0.138655	-14.3892	6.05347e-47	1.1105e-44	519.202	399.533	556.231	327.278	524.514	492.629	116.828	108.935	118.628	96.112	130.097	135.268
Abcb10	849.281	-1.37724	0.0957328	-14.3863	6.30757e-47	1.14518e-44	1261.7	1225.75	1314.3	1112.02	1271.2	1175.19	378.871	527.571	556.42	502.404	471.817	394.127
Rnf220	3282.73	-0.643504	0.044759	-14.3771	7.20746e-47	1.29521e-44	4172.8	3933.91	3975.76	4184.05	3998.33	3760.01	2447.92	2708.08	2596.63	2510.93	2606.27	2498.09
Wdpcp	447.84	1.1807	0.0821957	14.3645	8.63999e-47	1.53696e-44	283.575	248.9	282.809	295.645	284.039	253.239	664.935	548.278	617.617	690.259	621.862	582.919
Fyttd1	3541.15	-1.04007	0.0725312	-14.3396	1.23692e-46	2.17835e-44	4983.79	4700.65	4622.35	4805.76	4785.1	4696.79	2196.8	2627.05	2268.99	2151.6	2653.1	2001.78
Epb41l3	3908.48	-1.30257	0.0909847	-14.3163	1.73015e-46	3.0168e-44	5323.54	5902.48	5170.37	5721.89	5819.31	5434.75	1975.15	2602.74	2229.45	2529.49	2422.4	1770.17
Ppp2r2d	2142.46	-1.04172	0.0730796	-14.2546	4.19409e-46	7.24138e-44	2948.08	2856.21	2855.08	3084.2	2915.32	2649.12	1206.49	1643.03	1401.88	1401.27	1453.61	1295.27
Cdnf	166.646	1.85048	0.130021	14.2321	5.79138e-46	9.90213e-44	80.8257	71.7607	59.8476	77.8654	85.3859	58.3637	293.707	221.472	247.612	275.23	293.151	234.53
Ten1	940.805	0.845758	0.0596436	14.1802	1.21507e-45	2.05756e-43	728.801	672.353	674.753	643.606	713.582	605.4	1149.71	1184.78	1271.95	1179.56	1250.66	1214.5
Col19a1	569.665	-1.43018	0.101063	-14.1514	1.83035e-45	3.06992e-43	824.696	775.145	930.572	871.12	735.365	848.747	326.462	289.894	365.298	348.406	274.07	246.208
Trmt2b	236.044	-2.11352	0.149774	-14.1114	3.23012e-45	5.36656e-43	328.782	376.259	395.464	374.727	446.098	379.859	60.0516	123.34	93.2074	107.034	81.5272	66.1744
Rtn4ip1	390.956	-1.03163	0.0731474	-14.1034	3.61958e-45	5.95742e-43	493.174	544.994	523.373	556.008	515.801	517.36	244.574	277.29	264.558	257.755	268.866	227.718
Ccdc93	1060.98	-0.976384	0.0694066	-14.0676	6.00772e-45	9.79647e-43	1276.77	1562.57	1407.01	1445.38	1438.49	1309.72	709.7	756.245	717.415	667.323	782.315	658.825
Zfp148	2874.69	-0.787595	0.0561969	-14.0149	1.26317e-44	2.04089e-42	3605.65	3957.18	3482.9	3569.64	3435.48	3788.69	2116	2235.42	2041.15	2017.26	1977.47	2269.39
Scrt1	1917.23	-2.11723	0.151326	-13.9912	1.76474e-44	2.82535e-42	2883.7	3119.97	3095.65	3228.98	3128.78	3241.66	431.279	975.016	772.962	826.782	782.315	519.664
Zfp446	640.804	1.19848	0.0859108	13.9502	3.1358e-44	4.97519e-42	404.128	426.039	347.351	408.794	338.059	407.557	1045.99	799.459	884.058	902.142	871.648	854.429
Ccnd1	275.594	-2.35423	0.169113	-13.921	4.72028e-44	7.42222e-42	526.052	437.029	416.586	396.627	461.781	527.252	150.675	96.3312	78.1436	61.1622	81.5272	73.9597
Rala	4236.06	-0.775049	0.0557231	-13.9089	5.58963e-44	8.71142e-42	5396.14	5422.14	4968.53	5523.58	5568.38	5207.23	2928.33	3485.03	2962.87	3041.73	3274.97	3053.76
Neo1	6642.01	-1.15176	0.0828821	-13.8964	6.65906e-44	1.02871e-41	8155.18	10337.4	9174.29	8480.03	9291.38	9525.16	3931.74	4714.83	3948.6	3690.48	3745.92	4709.09
Fam102b	6794.5	0.695956	0.0501512	13.8772	8.71161e-44	1.33409e-41	5127.64	5507.47	5116.39	5142.77	5424.62	4793.74	8972.8	7963.98	8328.41	8713.43	8458.02	7984.73
Mgat2	1438.69	-1.00889	0.0728239	-13.8538	1.2064e-43	1.83155e-41	2126.13	1797.9	1813.03	2124.27	1871.52	1806.31	862.559	1067.75	959.377	926.17	1005.21	904.06
Map1b	78838.9	-1.39528	0.100811	-13.8405	1.45278e-43	2.18675e-41	96630.5	139737	109302	106247	115387	118166	35087.6	52104.4	42871.6	42236.9	41450.5	46846.6
Mau2	3653.86	-0.685942	0.0496938	-13.8034	2.43232e-43	3.63013e-41	4409.8	4554.54	4752.61	4440.76	4320.7	4558.3	2945.8	2538.82	2934.62	2769.77	2721.62	2899.02
Ptgr2	574.37	-1.33278	0.0968215	-13.7653	4.12133e-43	6.09922e-41	797.298	848.845	748.682	747.022	887.84	905.132	307.901	384.425	307.867	257.755	359.067	340.604
Fancc	395.243	1.21775	0.0885076	13.7587	4.51512e-43	6.62631e-41	234.258	228.858	269.901	197.097	248.316	247.304	571.036	482.556	581.84	517.694	596.71	567.349
Fubp1	5985.53	0.833555	0.0607544	13.7201	7.70026e-43	1.12074e-40	4530.35	4085.84	4216.32	4651.24	4256.23	4082.49	8521.86	6922.34	7334.2	7589.57	7573.36	8062.58
Tmem18	1576.1	-0.804798	0.0589505	-13.6521	1.96184e-42	2.83197e-40	2286.41	1887.76	1979.67	1985.57	1994.37	1901.27	1134.43	1164.08	1142.97	1075.8	1211.63	1149.29
Ubash3b	1918.49	-1.24637	0.0916057	-13.6058	3.69726e-42	5.29369e-40	2601.49	2913.1	2517.12	2690.01	2385.58	3088.33	1019.78	1423.36	1042.23	1150.07	1082.4	1108.42
Ttc3	41557	-0.991401	0.0731971	-13.5443	8.56672e-42	1.21668e-39	50343.4	61867.4	53729.1	52880.4	56036.7	56936.3	24489	32005.4	27500.9	28574.8	28846.8	25474.2
Ech1	799.975	-1.51201	0.111716	-13.5344	9.80345e-42	1.38119e-39	1315.13	963.921	1230.98	1223.95	1205.86	1172.22	325.37	447.445	434.026	394.278	526.458	360.067
Rnf44	4493.35	0.704343	0.0520859	13.5227	1.14845e-41	1.60519e-39	3365.91	3672.08	3399.58	3305.63	3235.08	3521.61	5638.3	5699.75	5290.23	5809.31	5121.47	5861.3
Sh3bgrl2	521.13	-1.26018	0.0933718	-13.4963	1.64332e-41	2.27878e-39	741.131	782.903	634.854	731.205	756.275	766.642	305.717	355.615	313.516	239.188	336.517	290
Rufy2	2541.96	-0.661643	0.0490794	-13.4811	2.02132e-41	2.78106e-39	3248.1	3092.18	3011.16	3209.52	3232.47	2896.42	2052.67	1838.4	1952.65	1972.48	2059	1938.52
Lrrc59	4468.69	-1.9097	0.141727	-13.4745	2.20957e-41	3.01649e-39	6218.1	7746.92	6559.77	7612.56	6794.28	7422.08	1326.59	2634.25	2018.55	1947.36	2000.89	1342.95
Zfp652	1593.47	-1.20807	0.0897323	-13.4631	2.58038e-41	3.49562e-39	1906.94	2624.11	2168.6	2165.63	1912.47	2565.04	925.886	1057.84	915.127	972.042	960.113	947.852
Wdr82	6539.81	-0.620275	0.0462433	-13.4133	5.05327e-41	6.79337e-39	8048.32	7968.03	7935.09	7230.54	8354.75	8009.68	4920.95	5137.06	5342.01	4933.38	5284.53	5313.42
Mtfp1	700.439	-0.91663	0.0683476	-13.4113	5.19124e-41	6.92598e-39	898.672	859.189	918.837	918.569	886.968	1014.93	460.759	523.069	510.287	484.929	496.969	432.08
Trim68	183.186	1.38812	0.103805	13.3724	8.77149e-41	1.16146e-38	106.854	96.3274	107.96	90.0319	108.039	98.9215	295.89	232.275	258.909	256.663	283.611	262.751
Hk1	10415.4	-1.47944	0.111163	-13.3088	2.05735e-40	2.70388e-38	13663.7	16344	14983	13652	16135.3	17216.3	4063.85	7012.37	5612.22	5673.88	5745.07	4883.28
Tmem80	674.414	1.09478	0.0823153	13.2999	2.31855e-40	3.02459e-38	454.816	400.179	390.77	451.376	416.474	468.888	1060.18	792.257	893.473	965.489	911.544	887.516
Slc25a17	1169.29	-1.08561	0.0816669	-13.2931	2.53832e-40	3.28694e-38	1709.67	1488.87	1572.47	1672.89	1635.4	1463.05	593.965	807.562	831.335	718.656	781.447	756.14
Zfp91	3938.52	-0.583029	0.0438628	-13.2921	2.57219e-40	3.30649e-38	4715.29	4887.49	4475.66	4854.42	4659.63	4748.23	3089.93	3335.58	3082.43	3088.69	3011.3	3313.59
Nhsl2	511.9	-1.32492	0.0996848	-13.2911	2.60749e-40	3.32757e-38	741.131	683.99	752.203	638.74	825.978	748.836	289.339	247.58	273.973	257.755	333.915	349.362
Ddhd1	1265.75	-1.00296	0.0754695	-13.2896	2.66166e-40	3.37226e-38	1579.53	1751.35	1716.81	1587.72	1801.82	1694.53	705.333	929.101	874.643	933.815	837.823	776.577
Scai	4272.23	-0.98625	0.0743874	-13.2583	4.04013e-40	5.0822e-38	5805.75	6386.7	5158.63	6137.99	5083.95	5496.08	2879.2	3248.25	2672.89	2833.12	2928.91	2635.3
Hgsnat	946.562	-1.15586	0.0872898	-13.2417	5.04114e-40	6.29643e-38	1249.37	1391.25	1398.79	1222.73	1208.47	1369.07	522.995	638.307	652.452	649.848	577.629	477.818
Iba57	972.85	0.884102	0.0668599	13.2232	6.44674e-40	7.99532e-38	780.858	687.222	637.201	689.839	645.622	664.753	1297.11	1169.48	1286.07	1387.07	1220.31	1208.66
Chid1	2526.9	-0.565555	0.0428499	-13.1985	8.94775e-40	1.10195e-37	3115.21	2865.26	3014.68	3096.37	2982.41	3030.96	1972.97	2110.28	2107.05	1941.9	2085.88	1999.83
Abcc8	505.119	-1.10447	0.0839121	-13.1622	1.44747e-39	1.77024e-37	661.675	669.12	735.774	681.323	711.84	680.58	254.4	371.82	325.755	300.35	333.047	335.738
Ano10	837.69	-1.59365	0.122411	-13.0188	9.56844e-39	1.16214e-36	1215.13	1344.06	1233.33	1355.35	1124.83	1280.04	270.778	529.372	469.803	413.937	429.319	386.342
Kctd3	4174.49	-1.03342	0.0793833	-13.0181	9.65948e-39	1.16516e-36	5067.36	6002.69	5683.18	5302.15	5620.66	5976.84	2239.38	3209.54	2767.04	2694.41	2749.38	2781.27
Trim36	407.286	-1.21411	0.0934394	-12.9935	1.3318e-38	1.59554e-36	547.971	629.684	540.976	599.807	546.296	550.993	197.624	296.196	253.261	256.663	240.245	227.718
Aldh18a1	2230.05	-1.5196	0.117099	-12.977	1.65124e-38	1.96487e-36	2769.99	3655.27	3282.23	3258.18	3369.26	3505.78	933.529	1385.55	1261.6	1240.72	1264.54	833.993
Vapa	4496.88	-0.609519	0.0470272	-12.961	2.03612e-38	2.40659e-36	5668.76	5382.7	5190.32	5654.98	5499.55	5205.25	3450.24	3773.12	3506.1	3640.24	3674.8	3316.51
Spef1	828.276	0.863003	0.0666246	12.9532	2.25298e-38	2.63886e-36	553.451	579.258	621.946	547.491	622.098	597.486	1187.93	974.116	1053.53	1118.39	1019.96	1063.66
Draxin	1434.7	1.89968	0.14666	12.9529	2.2626e-38	2.63886e-36	580.849	505.557	716.998	501.259	724.909	609.357	2604.05	1566.51	2159.78	2028.18	2121.44	3097.55
Samd12	627.321	-1.00995	0.0780365	-12.942	2.60787e-38	3.02153e-36	837.025	870.826	914.143	736.072	851.246	821.049	372.32	382.624	444.383	427.043	469.215	401.912
Sh3kbp1	1791.23	-0.979566	0.0757492	-12.9317	2.98127e-38	3.43158e-36	2283.67	2554.29	2251.91	2340.83	2406.49	2425.56	981.57	1389.15	1179.69	1178.46	1241.99	1261.21
Dbt	475.148	-1.83908	0.143272	-12.8363	1.02618e-37	1.17351e-35	630.166	877.937	695.875	704.439	679.602	868.531	203.083	276.39	170.409	192.224	253.255	149.866
Rrp7a	2197.72	-0.845043	0.0659527	-12.8129	1.38906e-37	1.5704e-35	3063.16	2618.3	2755.34	3034.32	2659.16	2817.29	1384.46	1698.85	1667.38	1573.83	1498.71	1601.81
Jpt2	973.443	-1.59718	0.124655	-12.8128	1.39107e-37	1.5704e-35	1345.27	1460.43	1480.94	1573.13	1553.5	1368.08	357.034	606.797	518.76	505.68	559.416	352.282
Tmem209	1410.93	0.729953	0.0571526	12.772	2.35012e-37	2.63617e-35	1063.06	1111.32	1008.02	1015.9	1089.98	1074.29	1779.71	1659.24	1742.7	1766.06	1660.03	1960.9
Slc36a1	1689.64	-1.20286	0.0942388	-12.764	2.60453e-37	2.90307e-35	2149.42	2777.33	2228.44	2264.18	2329.82	2385.99	850.549	1266.71	997.978	940.368	1065.06	1019.86
Edem1	664.739	-1.25355	0.0983806	-12.7419	3.46075e-37	3.83316e-35	879.493	1068.65	928.225	882.069	863.444	998.118	315.544	478.055	402.957	368.065	366.005	426.241
Ivd	1606.32	-0.793754	0.0626413	-12.6714	8.51682e-37	9.37435e-35	2013.79	2099.81	2111.1	1915	1891.56	2193.09	1119.14	1273.91	1142.03	1131.5	1103.22	1281.64
Gpam	950.205	-0.951956	0.0751642	-12.665	9.23908e-37	1.00621e-34	1127.45	1375.09	1286.14	1147.3	1283.4	1292.9	658.384	687.823	591.255	637.834	588.904	725.973
Asl	499.264	-1.3239	0.104533	-12.6649	9.25589e-37	1.00621e-34	786.338	641.321	698.222	652.123	785.028	721.138	211.818	316.002	314.457	285.059	321.772	257.886
Atrx	9212.96	-0.58503	0.0462443	-12.6509	1.10657e-36	1.19557e-34	10864.9	12103.6	10711.6	10779.5	10834.4	11034.7	7479.15	7766.82	6983.02	7157.07	7271.54	7569.19
Zkscan17	449.048	-1.10819	0.087924	-12.6039	2.009e-36	2.15734e-34	620.577	627.745	624.293	597.374	538.454	673.656	245.665	328.606	298.452	288.336	251.52	293.892
Mesd	1656.6	0.640959	0.0509338	12.5842	2.58027e-36	2.75401e-34	1297.32	1378.32	1202.82	1262.88	1248.55	1370.06	2083.24	1961.74	2011.02	2114.46	1980.07	1968.69
Ccdc85a	2101.86	-0.732443	0.0582586	-12.5723	2.99995e-36	3.18266e-34	2854.93	2466.37	2558.19	2648.64	2642.61	2580.86	1537.32	1543.1	1644.78	1414.38	1618.4	1712.75
Zfp282	1660.61	-0.760267	0.0605439	-12.5573	3.62523e-36	3.82299e-34	2094.62	1969.86	2281.25	1961.24	2061.46	2164.4	1135.52	1237.9	1351.98	1211.23	1175.21	1282.62
Abca7	409.378	-1.34583	0.107244	-12.5492	4.01592e-36	4.20978e-34	572.629	524.306	674.753	566.958	663.919	525.273	193.257	237.677	255.144	231.543	271.468	195.604
Clcn4	8183.36	-0.650597	0.0518585	-12.5456	4.2011e-36	4.37784e-34	9681.27	10892.8	9836.13	9764.81	9662.55	10147.4	5846.84	6948.45	6307.03	6455.89	6400.76	6256.4
Nras	3774.38	-0.834542	0.0665699	-12.5363	4.72454e-36	4.89435e-34	4453.63	5160.31	4792.5	4744.92	4941.93	4925.3	2323.45	2896.24	2683.24	2621.24	2715.55	3034.29
Pcyt1b	4838.3	-0.557835	0.0445431	-12.5235	5.55404e-36	5.72001e-34	5372.85	6005.27	5665.58	5663.49	6201.81	5657.32	3825.83	4040.51	3990.97	3896.9	3887.29	3851.74
Prpf40b	1908.39	-0.795791	0.06369	-12.4948	7.97412e-36	8.16466e-34	2431.62	2485.77	2290.64	2488.04	2430.89	2405.77	1181.38	1558.4	1408.47	1429.67	1435.4	1354.63
Ywhah	9073.61	-1.27334	0.10198	-12.4862	8.87658e-36	9.03615e-34	13202	13280.3	11960.1	12823.5	13316.7	12440.4	3809.45	6590.14	5316.59	5025.13	5814.45	5304.66
Ankfy1	3151.5	-0.965119	0.0773263	-12.4811	9.46497e-36	9.57975e-34	3849.49	4763.36	4087.24	4058.74	4094.17	4153.72	1870.33	2524.42	2152.24	2143.95	2153.53	1966.74
Bcl2l13	1786.29	-1.06051	0.0851301	-12.4575	1.27265e-35	1.28072e-33	2067.22	2697.17	2280.08	2326.23	2425.66	2689.68	1036.16	1358.54	1163.68	1204.68	1103.22	1083.12
Pef1	1511.15	0.820302	0.0658659	12.4541	1.32815e-35	1.32898e-33	1134.3	1081.58	1153.53	1070.65	1135.28	981.302	2042.85	1682.65	1971.48	2062.04	1854.31	1963.82
Gab1	471.222	1.21845	0.0978951	12.4465	1.46082e-35	1.44788e-33	257.546	321.953	300.412	284.695	293.623	237.412	731.537	583.389	640.212	608.345	629.668	765.872
Wdr7	6070.99	-1.1469	0.0921474	-12.4464	1.46342e-35	1.44788e-33	7381.17	9773.03	7983.2	8146.67	8427.07	8475.6	3096.48	4655.41	3791.38	3646.79	3689.54	3785.57
Atpaf1	402.797	-1.07547	0.086635	-12.4138	2.19986e-35	2.16434e-33	543.861	526.245	575.007	547.491	557.622	529.23	238.023	295.296	246.67	287.244	276.672	210.201
Fxr2	3145.42	-0.540252	0.0436244	-12.3842	3.18315e-35	3.11436e-33	3660.45	3605.49	3880.71	3781.34	3763.08	3679.88	2407.52	2674.77	2699.25	2509.83	2592.39	2490.3
Lsm14a	1258.85	-0.783131	0.0633274	-12.3664	3.97272e-35	3.86539e-33	1550.76	1684.11	1602.98	1464.84	1663.28	1587.69	884.396	1026.33	911.361	871.561	995.673	863.187
Drc3	380.084	1.30623	0.105831	12.3426	5.34238e-35	5.16948e-33	242.477	196.534	238.217	227.513	231.762	180.037	580.862	425.838	531.941	594.147	579.364	532.315
2900009J06Rik	87.4087	2.46774	0.199965	12.3409	5.45559e-35	5.25018e-33	38.358	16.1623	32.8575	32.8495	26.1386	18.7951	175.787	125.141	149.697	117.956	152.647	162.517
Ccdc177	522.709	-1.30322	0.105881	-12.3084	8.16623e-35	7.81605e-33	708.252	850.138	680.62	772.571	752.79	699.375	260.951	358.316	279.622	258.847	279.274	371.745
Gtf3c4	2698.64	-0.807902	0.0657723	-12.2833	1.1135e-34	1.05999e-32	3100.14	3831.76	3488.76	3327.53	3233.34	3625.47	1786.26	2123.79	1979.95	2057.67	1892.47	1936.58
Dvl3	1616.79	-1.43135	0.116621	-12.2735	1.25651e-34	1.1897e-32	1809.67	2541.36	2406.81	2435.73	2216.55	2743.09	703.149	1096.56	922.659	862.824	742.418	920.603
Scrt2	1022.85	1.03863	0.084735	12.2574	1.53391e-34	1.44458e-32	586.329	694.333	653.63	629.007	764.117	684.537	1493.65	1394.55	1255	1555.27	1375.56	1188.22
Faap100	4262.4	0.574925	0.0469232	12.2525	1.62964e-34	1.52657e-32	3224.81	3351.42	3658.92	3338.48	3484.27	3484.02	5095.65	5126.26	5168.77	5234.83	4699.09	5282.28
Tmbim6	5968.9	-1.24669	0.102205	-12.1979	3.18993e-34	2.97237e-32	8233.26	8744.46	8297.7	7924.02	8030.63	9163.1	2599.69	4449.24	3712.29	3555.05	3690.41	3226.98
Galnt11	1889.73	-0.672273	0.0553167	-12.1532	5.51922e-34	5.11573e-32	2363.12	2134.72	2395.08	2307.98	2356.83	2379.06	1449.97	1422.46	1539.33	1511.58	1512.59	1304.03
Bbs9	800.365	0.767213	0.0632504	12.1298	7.34539e-34	6.77275e-32	557.56	629.038	598.476	638.74	539.325	589.572	1009.96	939.004	990.446	1011.36	1013.89	1087.01
Mettl15	315.51	1.09857	0.090597	12.1258	7.70592e-34	7.06818e-32	208.229	192.008	206.533	205.613	194.297	199.822	493.515	384.425	433.085	463.085	432.788	372.718
Sfrp2	378.419	1.09842	0.0907376	12.1055	9.87784e-34	9.0134e-32	260.286	235.323	201.839	225.08	280.554	240.379	579.771	461.85	494.282	523.155	509.112	529.396
Strn3	2581.53	-0.738715	0.0610527	-12.0996	1.06088e-33	9.63048e-32	3164.53	3363.7	3103.86	3141.38	3327.44	3269.36	1779.71	2242.63	1896.16	1906.95	1969.66	1812.99
Shisa7	3298.33	-0.825293	0.0683795	-12.0693	1.5345e-33	1.38585e-31	4327.6	4284.31	4209.28	3757.01	4473.18	4247.69	2398.79	2247.13	2284.05	2243.34	2293.17	2814.36
Nt5dc2	97.0567	-2.05206	0.170352	-12.046	2.0367e-33	1.83001e-31	171.241	128.006	171.329	159.381	182.97	125.63	43.6739	26.1085	32.0106	40.4107	45.9675	37.953
Dlg5	1809.54	-0.8801	0.0731317	-12.0345	2.34171e-33	2.08282e-31	2089.14	2545.24	2289.47	2219.16	2430.01	2493.81	1264.36	1238.8	1228.64	1130.41	1321.78	1463.62
Pcyox1	3370.93	-0.802579	0.0666895	-12.0346	2.33905e-33	2.08282e-31	4407.06	4252.63	4305.51	4057.52	4357.3	4331.77	2339.83	2437.09	2379.14	2238.97	2385.97	2958.39
Anks1	2251.42	0.760339	0.0632148	12.0279	2.53657e-33	2.2448e-31	1631.58	1890.99	1646.4	1472.14	1656.31	1721.23	2998.21	2785.5	2764.21	2966.37	2652.24	2831.88
Snn	7353.48	1.17332	0.0975969	12.0221	2.71998e-33	2.39508e-31	4898.86	4348.96	4692.76	4107.4	4771.16	4288.25	12107.5	8230.47	9664.38	9702.94	9192.63	12236.4
Tuba4a	2897.02	-0.589329	0.0490596	-12.0125	3.0539e-33	2.67573e-31	3487.83	3555.71	3325.65	3618.31	3496.47	3398.94	2247.02	2520.82	2236.98	2351.47	2154.4	2370.6
Prkaa2	2989.65	-1.67521	0.140083	-11.9587	5.84835e-33	5.09878e-31	3680.99	5769.95	3946.42	4668.28	4214.41	5041.04	1095.12	2003.15	1362.33	1429.67	1483.97	1180.44
Txnl1	2600.06	-1.11718	0.0934468	-11.9553	6.09304e-33	5.28594e-31	3693.32	3306.16	3529.84	3920.04	3614.09	3296.07	1375.73	1881.61	1682.44	1700.53	1872.52	1328.35
Ercc6l2	829.956	1.15964	0.0970283	11.9515	6.37421e-33	5.50276e-31	486.324	522.366	556.231	481.792	536.712	493.618	1482.73	957.01	1117.55	1121.67	1122.3	1081.17
Aff2	691.501	-1.58981	0.133124	-11.9423	7.11933e-33	6.11603e-31	783.598	1336.3	947.001	1056.05	1008.95	1096.05	256.584	433.04	356.824	335.3	316.569	371.745
Unc5d	2923.84	-1.12488	0.094281	-11.9311	8.14535e-33	6.96348e-31	3628.94	4836.41	3596.73	3978.44	3545.26	4467.3	1809.19	2166.1	1613.71	1842.51	1747.63	1853.86
Mapk3	6014.18	-0.769645	0.0645359	-11.9258	8.67996e-33	7.38468e-31	7822.28	7123.06	8020.76	7254.87	7621.13	7650.59	3738.48	4599.59	4718.74	4439.72	4368.65	4812.24
Foxj2	1269.63	-0.790875	0.0664162	-11.9079	1.07708e-32	9.11948e-31	1472.67	1742.94	1545.48	1529.33	1621.46	1741.02	835.263	1002.02	935.84	886.852	967.052	955.637
Smarcal1	1350.56	-0.69523	0.0585312	-11.8779	1.54118e-32	1.29865e-30	1632.95	1768.8	1648.74	1559.74	1657.18	1748.93	924.794	1101.96	1017.75	1070.34	998.275	1077.28
Prnp	12426.4	0.62327	0.0525105	11.8694	1.70641e-32	1.43103e-30	10063.5	9537.71	9903.02	9544.6	9958.79	9691.34	15879.8	13809.6	14534.7	15349.5	14226.5	16617.6
Pten	7023.94	-1.05845	0.0892866	-11.8545	2.03935e-32	1.70213e-30	9014.12	10390.4	8809.34	9852.41	9682.59	9196.74	3853.13	5520.59	4514.44	4729.15	4888.17	3836.17
Nudt4	14522	0.446196	0.037647	11.8521	2.09851e-32	1.74325e-30	12014.3	12563.3	12611.4	12039.9	12861.9	11665.8	17209.7	16090.9	16708.6	17034.8	16936	16527.1
Hmgcl	757.84	-1.06581	0.0899654	-11.8469	2.23429e-32	1.84732e-30	991.827	909.616	1146.49	1051.18	1060.35	999.108	423.637	523.069	536.649	443.426	569.823	438.892
Zbtb37	1528.88	-0.81878	0.0691185	-11.846	2.25626e-32	1.85678e-30	1697.34	2149.59	1926.86	1936.9	1859.32	2134.73	1062.37	1164.98	1183.45	1119.49	1070.26	1041.27
Tceal3	1322.99	-0.928982	0.0785794	-11.8222	2.99712e-32	2.45499e-30	1832.96	1626.58	1664	1598.67	1736.47	1953.7	764.293	1001.12	891.59	891.22	1003.48	911.845
Med12l	1016.92	-0.969666	0.082137	-11.8055	3.65757e-32	2.98211e-30	1346.64	1199.24	1419.91	1303.03	1376.63	1435.35	634.363	792.257	742.835	702.273	677.37	573.187
Ttl	3861.13	-1.3048	0.110567	-11.8011	3.8538e-32	3.12762e-30	4837.21	6087.38	5396.85	5546.7	5323.55	5791.86	1607.2	2800.81	2339.6	2368.94	2286.23	1947.28
Rbfox1	2993.22	-1.12726	0.0956259	-11.7883	4.48643e-32	3.62434e-30	3791.96	4557.78	3933.51	3682.79	3885.06	4787.8	1518.76	2264.23	1829.31	1856.71	1859.52	1951.17
Slc1a6	254.716	-1.25852	0.106835	-11.78	4.95032e-32	3.98083e-30	380.84	327.125	364.953	333.361	405.148	346.225	116.828	156.651	137.457	160.551	179.533	147.919
Dcun1d2	990.623	-0.757959	0.0643873	-11.7719	5.44969e-32	4.36248e-30	1320.61	1180.5	1303.74	1271.4	1244.2	1155.4	733.721	738.239	805.915	658.586	774.509	700.671
Zfp644	2315.11	-0.623438	0.0529846	-11.7664	5.81608e-32	4.6347e-30	2828.9	2713.98	2899.68	2836.01	2979.79	2588.78	1851.77	1713.26	1849.08	1758.41	1791	1970.64
Rhot1	2748.56	-0.731721	0.062355	-11.7348	8.45622e-32	6.70822e-30	3241.25	3596.44	3499.33	3473.53	3497.34	3277.27	2022.1	2191.31	2141.89	2102.45	2189.09	1750.7
Twsg1	1100.16	-0.826848	0.0705417	-11.7214	9.90091e-32	7.81906e-30	1401.44	1484.99	1340.12	1301.81	1448.08	1465.03	696.598	920.098	790.851	816.952	771.04	764.899
Jam2	263.007	-1.31776	0.112603	-11.7027	1.23529e-31	9.71195e-30	338.372	427.332	318.014	337.011	397.306	432.287	146.307	170.155	147.814	137.615	133.566	170.302
Cdh11	1246.12	-0.755564	0.0646029	-11.6955	1.3439e-31	1.05189e-29	1516.51	1677.65	1450.42	1439.29	1698.13	1603.52	1015.42	929.101	915.127	856.27	908.075	943.959
Fam174b	1401.07	-1.48726	0.127325	-11.6808	1.59801e-31	1.24525e-29	1776.8	2320.26	1912.78	2109.67	1976.95	2296.96	515.352	1019.13	746.601	715.379	724.205	698.724
Rabggta	1571.93	0.527133	0.0451812	11.6671	1.87731e-31	1.45644e-29	1206.91	1336.3	1281.44	1236.11	1340.04	1317.63	1819.02	1880.71	1862.27	1818.48	1849.11	1915.17
Arpp19	4008.4	-0.731046	0.0627754	-11.6454	2.42105e-31	1.87005e-29	5068.73	5228.19	4641.13	4834.96	5096.15	5143.92	3502.64	3055.59	2803.75	2846.23	3032.12	2847.45
Odc1	4675.44	0.36946	0.0317559	11.6344	2.75592e-31	2.11941e-29	4001.56	4166	4087.24	4180.4	4088.94	3951.92	5260.52	5215.39	5209.26	5297.08	5249.83	5397.11
Psme3	3370.77	-0.731587	0.0630103	-11.6106	3.64057e-31	2.78757e-29	4057.72	4404.56	4015.66	4287.47	4172.58	4307.04	2236.1	2908.84	2526.01	2634.34	2464.03	2434.83
Kctd20	3291.46	-0.819351	0.0706637	-11.5951	4.36474e-31	3.32759e-29	4059.09	4402.62	4292.6	3840.96	4152.54	4463.34	1975.15	2674.77	2426.22	2391.88	2405.92	2412.45
Ppa2	823.126	-0.795743	0.0687032	-11.5823	5.06483e-31	3.84469e-29	1094.57	965.86	1108.94	1146.08	984.552	972.399	567.76	627.503	610.085	637.834	606.251	555.671
S100pbp	1162.19	-1.01344	0.0877076	-11.5547	6.98737e-31	5.28131e-29	1600.07	1557.4	1470.37	1404.01	1680.71	1614.4	831.987	721.134	742.835	615.99	905.473	801.879
Ipo8	1631.19	0.703943	0.0609837	11.5431	7.99512e-31	6.01719e-29	1115.12	1373.8	1228.64	1299.38	1151.84	1269.16	2066.87	1905.92	2019.49	2131.94	1962.73	2049.46
Kcnd3	3263.27	-0.739347	0.0641917	-11.5178	1.0731e-30	8.04183e-29	4197.46	4376.76	3772.75	4285.03	4004.43	3852.99	2459.93	2666.66	2284.99	2507.65	2578.52	2172.08
Xpc	780.142	0.864305	0.0750972	11.5092	1.18641e-30	8.85336e-29	556.19	512.022	598.476	475.709	613.385	562.864	1120.23	942.605	996.095	958.936	1004.35	1020.84
Chp1	3667.96	0.672927	0.0585956	11.4843	1.58268e-30	1.17606e-28	2713.83	3222.77	2683.76	2836.01	2592.07	2909.28	4641.44	4626.6	4341.21	4661.43	4373.85	4413.25
Spryd3	9673.33	0.503258	0.0438492	11.477	1.72114e-30	1.27357e-28	8189.42	7567.85	8364.59	7883.88	7719.59	8300.51	11053.9	10755.8	11682	11799.9	11678.3	11084.2
Zfp12	1223.8	-0.673558	0.0587044	-11.4737	1.78779e-30	1.31736e-28	1442.53	1510.85	1601.8	1401.58	1638.89	1429.42	940.08	955.209	961.26	928.354	993.939	881.677
Slc8a2	3332.53	-1.121	0.0977435	-11.4688	1.89337e-30	1.38934e-28	4570.08	4436.88	5038.94	3865.29	4927.99	4556.33	1781.89	2074.27	2148.48	1928.79	1961.86	2699.53
Grin2d	814.751	-1.01439	0.0884518	-11.4683	1.90326e-30	1.3908e-28	1183.62	1060.25	1118.33	930.735	991.522	1257.29	450.933	572.586	529.117	551.552	555.946	575.134
Thbs1	1173.39	0.975157	0.0850352	11.4677	1.91716e-30	1.39517e-28	876.753	818.46	672.406	761.621	787.642	828.962	1765.52	1508.89	1498.85	1738.75	1485.7	1337.11
Dsn1	116.11	-1.625	0.141805	-11.4594	2.10961e-30	1.52891e-28	176.721	182.957	160.767	197.097	158.574	177.07	48.0413	81.0263	54.6064	52.4247	48.5694	55.4698
Traf7	2682.68	-0.505814	0.0443193	-11.4129	3.60374e-30	2.60105e-28	3172.75	2999.08	3311.57	3051.35	3275.16	3081.41	2174.96	2148.1	2313.24	2228.05	2154.4	2282.05
Fam8a1	3349.62	-0.66552	0.058484	-11.3795	5.28798e-30	3.80108e-28	4141.29	4253.28	3844.33	4184.05	4139.48	4092.38	2393.33	2925.95	2471.41	2501.1	2753.71	2495.17
Fbxo32	95.3208	1.71411	0.150676	11.3761	5.49782e-30	3.93586e-28	43.8377	45.901	30.5106	36.4994	60.99	46.4931	151.767	132.343	157.229	138.707	144.841	154.731
Zdhhc15	438.381	-0.772681	0.0679476	-11.3717	5.78387e-30	4.12388e-28	524.682	541.115	583.221	540.191	558.494	571.766	298.074	351.114	334.229	324.378	328.711	304.597
Ss18	517.475	1.11304	0.0979713	11.3609	6.5471e-30	4.64923e-28	371.25	304.498	332.096	333.361	326.732	297.754	852.732	582.489	656.218	751.421	663.493	737.65
Fam20b	2784.04	-0.69326	0.0610757	-11.3508	7.34516e-30	5.195e-28	3382.35	3550.54	3472.34	3220.47	3526.09	3491.93	1820.11	2230.92	2211.56	2066.41	2311.38	2124.39
Gdf9	85.2003	2.04942	0.180679	11.3429	8.04725e-30	5.6688e-28	53.4272	27.7992	29.3371	19.4664	40.0791	30.6657	143.032	116.138	151.58	133.246	149.178	128.456
Sorbs1	1201.48	-0.960217	0.0846897	-11.3381	8.50124e-30	5.96475e-28	1460.34	1862.55	1514.97	1457.54	1468.99	1755.86	761.017	917.397	782.377	786.371	766.703	883.623
Apbb1	13421.4	-0.834056	0.0736046	-11.3316	9.15367e-30	6.39704e-28	17143.3	16412.5	18062.3	17149.9	17318.5	17095.6	7874.4	10591	10714.1	10006.6	9824.9	8863.48
Mex3a	2461.71	0.966472	0.0853872	11.3187	1.06042e-29	7.38143e-28	1575.42	1602.66	1874.05	1495.26	1869.78	1580.77	3540.86	2695.47	3230.25	3179.34	3238.54	3658.08
Smarcc2	8472.85	-0.647025	0.0572966	-11.2926	1.42813e-29	9.90188e-28	10292.3	10780.9	10039.1	9795.23	10003.2	11137.6	6228.99	6959.25	6616.78	6293.15	6205.61	7322.01
Pnkd	2831.25	-1.0008	0.0888125	-11.2686	1.87445e-29	1.29454e-27	3654.97	4130.44	3594.38	3682.79	3574.01	4018.19	1559.16	2302.05	1863.21	1750.77	1761.51	2083.52
Sqstm1	9613.65	-1.07425	0.0954897	-11.2499	2.31874e-29	1.59309e-27	12729.4	13202.7	12475.3	13750.5	12892.4	13168.4	4807.4	7503.93	6591.36	6738.76	6283.67	5220
Pip4k2b	9212.12	-0.609002	0.0541368	-11.2493	2.33387e-29	1.59309e-27	10848.5	11478.5	11237.3	10474.1	11508.8	11220.7	6503.04	7857.75	7402.93	7158.16	7084.2	7771.6
Kidins220	17811.9	-0.696234	0.0618897	-11.2496	2.32655e-29	1.59309e-27	19813.3	24974.7	21379.7	21410.6	22024.3	22562	12603.2	14675.7	13648.8	14148.1	13492.8	13010.1
Sun2	1035.52	1.08625	0.0968454	11.2163	3.39116e-29	2.30586e-27	671.264	549.519	772.152	559.658	711.84	716.192	1546.05	1182.98	1453.66	1462.43	1437.13	1363.39
Uhmk1	11577.1	-1.14145	0.101999	-11.1908	4.523e-29	3.06363e-27	14765.1	19135.5	14967.8	15052.4	15215.3	16456.6	5899.25	9290.11	6834.27	7127.58	7488.36	6693.35
Rab14	7142.52	-0.731486	0.0655862	-11.153	6.9204e-29	4.66954e-27	8678.49	9965.04	7994.94	8924.11	8687.58	9239.27	5276.89	6067.07	4889.15	5332.03	5337.43	5318.28
Syt1	34548	-0.92046	0.0825517	-11.1501	7.15194e-29	4.80736e-27	44588.4	49946.1	40676.4	44641.2	42899.5	48506.2	21347.8	28080.1	22323.6	25890.2	24751.3	20924.7
Sptbn1	38044.6	-1.2472	0.112066	-11.1291	9.05302e-29	6.06208e-27	44796.6	63707.4	52295.1	49110	52027.9	59279.7	17196.6	28723.8	22769.9	23166.3	21634.2	21827.8
Ogdhl	3248.81	-0.875119	0.0786452	-11.1274	9.22522e-29	6.15399e-27	4128.96	4442.05	3995.71	3983.3	4169.1	4511.81	1930.38	2733.29	2250.16	2293.58	2425.87	2121.47
Zeb1	842.658	-0.885913	0.0796545	-11.1219	9.81107e-29	6.5201e-27	1050.73	1115.85	1079.6	1087.68	1187.56	1037.69	598.332	619.401	523.468	678.245	633.137	500.201
Utp6	1203.5	-0.649598	0.0585077	-11.1028	1.21602e-28	8.05085e-27	1448.01	1456.55	1471.55	1355.35	1628.43	1458.1	978.295	932.702	930.191	891.22	998.275	893.355
Rspo2	978.096	0.778388	0.0701602	11.0944	1.3351e-28	8.80613e-27	619.207	764.155	753.376	693.489	743.206	742.901	1231.6	1155.07	1346.33	1156.62	1196.02	1335.17
Zkscan8	715.209	-0.666036	0.0600482	-11.0917	1.37663e-28	9.04621e-27	857.574	930.303	870.724	840.703	905.265	854.682	609.25	530.272	539.473	562.474	561.15	520.637
Mmd2	2459.12	-0.931169	0.084236	-11.0543	2.08998e-28	1.36828e-26	3405.64	3107.04	3298.66	2792.21	3471.2	3283.21	1643.23	1751.07	1708.8	1515.95	1483.97	2048.49
Prpf4b	2291.84	-0.501474	0.0453885	-11.0485	2.22971e-28	1.45435e-26	2764.51	2746.3	2598.09	2641.34	2739.32	2628.35	1922.74	1851.9	1866.97	1799.92	2054.66	1887.92
Tmem38a	2679.52	-0.678704	0.0614972	-11.0363	2.55199e-28	1.65842e-26	3504.27	3189.8	3281.06	3349.43	3137.5	3332.67	1896.54	2315.55	2085.4	2177.81	2014.76	1869.43
Eef2	49199.7	-1.04439	0.094639	-11.0356	2.57419e-28	1.66669e-26	63781.1	66725.2	69347	62315.5	65141.6	70305.5	24105.8	39627.2	34113	32100.3	32437.4	30396.5
Tomm40l	594.81	-0.931248	0.084715	-10.9927	4.14266e-28	2.6724e-26	763.049	714.375	813.224	815.154	747.563	832.919	329.738	465.451	428.377	412.845	434.523	380.503
Armc10	1448.27	0.855136	0.0780899	10.9507	6.59635e-28	4.23972e-26	982.238	1002.71	1132.41	1020.77	1076.91	971.41	2035.2	1592.62	1836.84	1787.9	1786.66	2153.59
Nmt1	4877.33	0.513623	0.0469769	10.9335	7.96958e-28	5.10372e-26	3893.33	4231.3	3920.61	3778.91	3935.59	4339.69	5886.15	5706.95	5755.32	5787.47	5429.37	5863.25
Atl1	4576.62	0.47366	0.0433265	10.9323	8.07482e-28	5.15238e-26	3963.2	3719.92	3897.14	3698.61	3840.62	3874.76	5643.76	4921.89	5264.81	5309.1	5437.17	5348.45
Kdm8	161.871	1.5549	0.14224	10.9315	8.15182e-28	5.18273e-26	95.8949	95.0345	73.9294	49.8825	70.5741	105.846	264.227	222.372	242.904	230.45	248.051	243.288
Zfta	8628.57	0.585588	0.0536365	10.9177	9.4851e-28	6.00871e-26	6497.56	6903.25	7328.4	6889.87	7224.7	6560.48	10063.6	9588.11	10918.4	10026.2	10306.3	11236
Ubl3	2168.8	-1.11233	0.102328	-10.8702	1.59817e-27	1.0088e-25	2800.13	3045.63	2833.96	3106.1	2817.74	3193.19	1078.74	1738.46	1387.75	1364.13	1506.52	1153.19
Zdhhc3	2619.82	-0.813382	0.0748544	-10.8662	1.67034e-27	1.05059e-25	3257.69	3652.04	3075.7	3390.8	3210.69	3449.39	1601.74	2205.71	1877.33	1956.1	1942.78	1817.85
Rpa2	556.696	0.698361	0.0643021	10.8606	1.77538e-27	1.11268e-25	408.238	417.634	435.362	394.194	449.583	440.201	729.354	676.119	681.638	631.281	719.001	697.751
Ago1	3386.86	-0.894891	0.0824072	-10.8594	1.79962e-27	1.12387e-25	4061.83	4929.51	4343.06	4012.5	4135.99	4945.09	2046.12	2668.46	2410.21	2213.85	2294.91	2580.8
Gid4	1569.86	-0.795426	0.0733158	-10.8493	2.0091e-27	1.25025e-25	1961.74	1937.54	2128.7	1754.41	2106.77	2063.5	1009.96	1156.87	1133.55	1103.1	1150.92	1331.27
Slc8a3	1140.86	-0.691661	0.0640395	-10.8005	3.42219e-27	2.12212e-25	1548.02	1345.35	1369.45	1305.46	1490.77	1398.75	883.304	877.784	819.095	870.469	964.45	817.449
Gmps	5730.24	0.572716	0.0530472	10.7964	3.58122e-27	2.21294e-25	4357.74	4858.39	4698.63	4302.07	4806.88	4611.72	7422.37	6329.05	6706.23	7042.39	6967.11	6660.26
Idh2	547.122	-0.960146	0.0890456	-10.7826	4.15772e-27	2.5602e-25	774.009	720.193	659.497	695.922	640.395	848.747	334.105	397.929	369.064	365.881	417.177	342.55
Dcaf12	2411.07	-0.766068	0.0711496	-10.767	4.92823e-27	3.02408e-25	2791.91	3280.95	2911.41	2928.47	3043.4	3262.43	1528.59	2001.35	1825.55	1755.14	1881.2	1722.48
Pdcd10	1025.75	-1.19263	0.110792	-10.7646	5.05935e-27	3.09376e-25	1687.75	1064.77	1449.25	1543.93	1397.54	1421.5	749.007	524.87	577.133	633.465	665.228	594.597
Zmat4	1483.99	1.18138	0.109991	10.7407	6.55626e-27	3.99523e-25	972.648	1051.2	780.366	997.651	764.117	882.38	2124.73	2176	2052.45	2426.83	2031.24	1548.29
Surf6	1228.53	0.56959	0.0530983	10.7271	7.59463e-27	4.61203e-25	969.908	1023.4	1020.93	968.451	1020.27	926.895	1529.68	1350.44	1436.71	1526.87	1469.23	1499.63
Stmn1	33138.8	0.719309	0.0670775	10.7235	7.8922e-27	4.77627e-25	26725.9	22989.9	25945.7	24421.8	26321.5	23865.8	44404.3	35428.3	40675.1	40497	40904.1	45486.2
Mycbp2	12348.5	-0.864268	0.0806039	-10.7224	7.98892e-27	4.81825e-25	13677.4	19555.8	15367.9	14215.3	16006.4	16814.7	8545.88	9378.34	8784.09	8599.84	8442.41	8794.39
St3gal3	1311.02	-0.6446	0.0601249	-10.721	8.11103e-27	4.8752e-25	1589.12	1568.39	1693.34	1672.89	1551.76	1524.38	893.131	1102.86	1029.99	1031.02	1071.13	1004.29
Hipk1	2409.61	-1.05593	0.0985716	-10.7123	8.90725e-27	5.33556e-25	2864.52	3871.85	2937.23	3204.65	3123.56	3521.61	1335.33	1929.33	1543.1	1518.13	1646.16	1419.83
Mamld1	995.238	-1.39118	0.129921	-10.7079	9.34671e-27	5.57983e-25	1180.88	1786.26	1247.41	1733.72	1166.65	1531.31	456.392	700.427	530.058	537.353	526.458	545.939
Fbxl16	6790.31	-0.931524	0.0870219	-10.7045	9.69774e-27	5.76983e-25	8586.7	9280.41	9187.2	8413.12	8568.22	9421.29	3688.26	5370.24	4814.77	4658.16	4200.39	5294.93
Smad1	1873.8	0.564844	0.0527793	10.702	9.96114e-27	5.90658e-25	1519.25	1554.82	1500.88	1632.74	1438.49	1423.48	2430.45	2176	2166.37	2263	2153.53	2226.58
Trim26	879.261	-1.02762	0.0961583	-10.6868	1.17368e-26	6.93611e-25	1137.04	1267.13	1035.01	1141.22	1118.73	1379.96	495.698	684.222	623.266	570.119	597.577	501.174
Dclk2	5595.38	0.386785	0.0362022	10.684	1.20908e-26	7.12146e-25	4812.55	5129.92	4935.67	4723.03	4672.7	4818.47	6442.99	6397.47	6208.18	6318.27	6449.33	6235.97
Fbxo7	2029.71	-0.76992	0.0720701	-10.6829	1.22346e-26	7.18211e-25	2519.3	2598.9	2486.61	2508.73	2807.28	2431.49	1534.04	1598.92	1503.56	1268.02	1402.44	1697.18
Tceanc2	1102.29	0.694389	0.0650835	10.6692	1.41847e-26	8.29924e-25	838.395	863.715	871.898	734.855	924.433	813.135	1386.65	1287.42	1367.98	1491.92	1314.84	1332.25
Oard1	399.423	1.05222	0.0986557	10.6656	1.47479e-26	8.6002e-25	297.274	213.989	278.115	278.612	246.574	251.261	607.067	455.548	524.409	520.971	581.098	538.154
Phtf2	1644.8	0.74871	0.0702127	10.6635	1.50892e-26	8.74132e-25	1152.11	1342.77	1227.46	1192.31	1256.39	1185.08	2369.31	1975.24	1984.66	2196.38	1840.43	2015.4
Zfp738	672.171	-0.824982	0.0773648	-10.6635	1.50769e-26	8.74132e-25	945.25	808.763	928.225	775.004	869.543	830.941	493.515	411.433	511.228	478.376	520.387	493.389
Tmem151b	5878.18	-1.42512	0.133969	-10.6377	1.98883e-26	1.14837e-24	7461.99	8276.4	9459.45	8448.4	8537.72	9215.53	2123.64	3553.45	3997.56	3488.43	3553.37	2422.18
Scn2b	2453.47	-0.625752	0.058834	-10.6359	2.02866e-26	1.16754e-24	2927.53	3110.92	2936.05	2850.6	2874.37	3164.5	1753.51	2147.2	1838.73	1975.76	2001.75	1860.67
Smarcc1	5641.66	0.623444	0.0586587	10.6283	2.20036e-26	1.26223e-24	4149.51	4947.61	4328.98	4229.07	4480.15	4500.93	7224.75	6748.59	6715.64	7010.71	6166.58	7197.44
Tmem63c	754.337	-0.672308	0.0632581	-10.628	2.20766e-26	1.26231e-24	872.644	985.902	941.133	875.986	952.315	931.841	531.729	564.483	607.26	553.736	605.383	629.63
Polr3f	883.305	-0.551032	0.0519799	-10.6009	2.95252e-26	1.68274e-24	1053.47	1033.74	1059.66	1071.87	1081.26	1003.06	674.761	725.635	724.005	684.798	730.276	757.113
Ebf4	418.528	-1.17421	0.11094	-10.5841	3.53098e-26	2.00594e-24	645.236	543.054	627.813	604.674	518.415	545.058	214.002	284.492	270.207	245.741	318.303	205.335
Rab22a	1647.34	-0.652636	0.0616824	-10.5806	3.66649e-26	2.07623e-24	1906.94	2189.03	1909.26	1991.65	2099.8	1982.39	1144.26	1382.85	1259.71	1283.31	1250.66	1368.25
Spns1	1924.3	-0.65766	0.0622773	-10.5602	4.55749e-26	2.5725e-24	2482.31	2214.24	2594.57	2288.51	2227	2332.57	1342.97	1627.73	1532.74	1454.79	1469.23	1524.93
AI837181	1245.49	-0.867574	0.0821619	-10.5593	4.59972e-26	2.58804e-24	1637.06	1532.83	1709.76	1700.87	1571.8	1506.58	716.251	991.221	995.154	871.561	901.136	811.61
Ei24	4113.34	-0.585113	0.0554572	-10.5507	5.04096e-26	2.82727e-24	5270.11	4370.29	5087.05	4872.67	5148.42	4875.84	3065.91	3285.16	3429.84	3247.06	3271.5	3436.21
Ubxn2a	1244.81	-0.857627	0.0813261	-10.5455	5.32691e-26	2.97817e-24	1553.5	1614.94	1554.86	1753.19	1555.24	1594.62	824.344	1015.53	880.292	980.779	894.198	716.241
Rnasel	981.462	1.03542	0.0982365	10.5401	5.64516e-26	3.1461e-24	668.524	597.359	624.293	590.074	711.84	669.699	1488.19	1069.55	1256.89	1151.16	1400.71	1549.26
Agpat5	3201.74	-0.470694	0.044726	-10.524	6.7004e-26	3.72242e-24	3742.64	3551.19	3664.79	3820.27	3786.6	3755.06	2764.56	2763.9	2640.88	2652.91	2809.22	2468.89
Nrep	40485.5	0.775415	0.0737013	10.521	6.91009e-26	3.82684e-24	30856.2	29026.9	30297	27279.7	30403.5	31296.8	55040	44433.9	49098.6	47720.7	50056.9	60316.1
Epb41l1	15927.7	-0.650341	0.0619719	-10.4941	9.1923e-26	5.07479e-24	18257	20479	19383.6	18451.7	19471.5	20704.3	10689.2	13669.1	12401.3	12715.2	12312.3	12598.4
Ccdc88c	1731.75	1.09349	0.104313	10.4827	1.03688e-25	5.70642e-24	1211.02	1043.44	1252.11	959.935	1206.73	958.55	2699.04	1922.12	2230.39	2431.2	2123.18	2743.32
Slx4ip	1076.19	0.816713	0.0780161	10.4685	1.20507e-25	6.61139e-24	793.188	766.741	800.315	818.804	839.919	657.828	1550.42	1224.4	1280.42	1451.51	1394.64	1336.14
Syt9	1072.04	-1.18411	0.113119	-10.4679	1.21319e-25	6.63525e-24	1264.44	1523.14	1541.96	1627.87	1669.38	1305.76	531.729	737.339	756.016	764.527	607.118	535.234
Prss36	433.242	1.12197	0.107203	10.4659	1.23957e-25	6.75851e-24	291.794	228.858	281.636	236.03	327.603	272.034	609.25	514.967	613.851	550.46	562.018	710.402
Arsg	324.042	0.967283	0.0925064	10.4564	1.36978e-25	7.44545e-24	198.639	258.597	207.706	229.946	204.752	211.692	394.157	449.246	404.84	480.56	448.4	399.966
Herc2	10200.6	-1.07	0.102342	-10.4552	1.38765e-25	7.51901e-24	11304.6	17635	13019.8	12701.8	13347.2	14901.5	6251.91	7459.82	6292.91	6183.93	5914.19	7394.02
Clip2	9050.05	0.573076	0.0548142	10.4549	1.39186e-25	7.51901e-24	6682.5	7707.49	7520.85	7052.9	7286.56	7397.35	10268.8	11453.5	10789.5	11199.2	9849.19	11392.7
Tenm1	8688.64	-1.34455	0.128741	-10.4438	1.56355e-25	8.42071e-24	9341.53	14085.8	12707.6	11615.3	12371.4	14684.9	3353.06	5862.7	5454.99	4908.26	5210.81	4667.24
Ppfia4	3461.38	-0.868345	0.0832098	-10.4356	1.70512e-25	9.15515e-24	4522.13	4513.17	4524.95	4078.2	4501.06	4698.77	1863.78	2765.7	2546.73	2516.39	2569.84	2435.8
Coro6	174.708	-1.47165	0.141041	-10.4342	1.73035e-25	9.26239e-24	260.286	273.467	245.258	270.096	236.118	256.207	87.3477	117.938	84.734	103.757	105.812	55.4698
Smg1	6232.12	-0.760402	0.0729372	-10.4254	1.89781e-25	1.0128e-23	6768.81	9359.92	7605.34	7437.37	7892.97	7953.29	4750.62	4803.96	4643.42	4601.36	4228.14	4740.23
Jpt1	11452.2	0.535335	0.0513931	10.4165	2.08519e-25	1.10943e-23	9588.12	9060.6	9920.63	8737.96	9710.47	9092.87	13749.6	12929.1	13929.3	12764.3	13230.8	14712.1
Tspan14	2672.63	0.752319	0.0723473	10.3987	2.5132e-25	1.33313e-23	1889.13	1910.39	2283.6	1826.19	2166.01	1870.61	3360.7	2952.96	3543.76	3370.47	3308.79	3588.99
Trmo	286.189	1.15086	0.110698	10.3965	2.5734e-25	1.36097e-23	190.42	166.795	205.36	161.814	186.455	157.285	440.014	312.401	403.899	365.881	452.736	391.208
Def6	128.516	1.61809	0.15568	10.3937	2.64812e-25	1.39629e-23	71.2362	53.6589	73.9294	60.8324	69.7028	51.4392	193.257	132.343	200.537	208.607	196.012	230.637
Anapc16	2441.27	0.434662	0.0418537	10.3853	2.89307e-25	1.52089e-23	2117.91	2049.38	2053.6	2053.7	2032.71	2153.52	2732.89	2821.51	2876.25	2864.79	2904.63	2634.33
Tcp11l1	952.736	-0.69192	0.066633	-10.3841	2.93057e-25	1.53602e-23	1058.95	1163.04	1221.6	1194.75	1254.65	1167.27	666.026	733.738	744.718	718.656	685.176	824.261
Cirbp	2124.71	-0.713474	0.0687924	-10.3714	3.34524e-25	1.74816e-23	2828.9	2619.59	2397.43	2604.84	2512.79	2877.63	1424.86	1791.58	1528.98	1576.02	1683.45	1650.47
Pak2	1698.24	-0.909166	0.0876701	-10.3703	3.38429e-25	1.76333e-23	2022.01	2510.33	2053.6	1997.74	2309.78	2402.8	1087.48	1400.85	1081.77	1065.97	1251.53	1195.03
Cd1d1	179.129	1.62374	0.156667	10.3642	3.60641e-25	1.87352e-23	105.484	86.6301	77.4499	114.365	83.6434	61.3314	326.462	252.082	237.255	277.414	319.171	208.255
Ppat	1133.94	0.514675	0.0496707	10.3617	3.70188e-25	1.91747e-23	928.811	922.545	954.042	923.435	927.919	944.701	1389.92	1237	1327.5	1412.19	1331.32	1307.92
Dazap2	1656.15	-1.03701	0.100138	-10.3558	3.93717e-25	2.03336e-23	2154.9	2420.47	2105.23	2227.68	2107.64	2347.41	839.63	1324.33	1113.78	1111.84	1201.23	919.63
Anapc5	12695.5	0.459396	0.0444041	10.3458	4.37276e-25	2.25172e-23	10358	11029.8	10705.7	10620.1	10916.3	10509.4	15125.4	14059	15039.3	14507.5	13681	15794.3
Mknk2	3180.65	0.657047	0.0636531	10.3223	5.5867e-25	2.86844e-23	2530.26	2329.31	2626.25	2387.06	2538.92	2400.83	4225.45	3534.55	3981.56	4085.85	3457.1	4070.7
Ap5z1	972.005	0.574772	0.0556969	10.3196	5.74389e-25	2.94057e-23	769.899	828.804	790.928	753.105	753.662	785.437	1101.67	1090.25	1205.11	1175.19	1168.27	1241.74
Rnf38	2102.34	-0.819497	0.0795245	-10.305	6.69139e-25	3.41571e-23	2560.39	2986.15	2452.58	2603.63	2643.48	2856.85	1424.86	1699.75	1406.58	1313.89	1695.59	1584.29
Mal2	2006.85	-0.801708	0.0778089	-10.3036	6.79068e-25	3.45638e-23	2683.69	2390.73	2588.7	2584.16	2883.08	2176.27	1309.12	1525.99	1439.54	1453.69	1648.76	1398.42
Dnaaf9	4456.5	-0.435982	0.0423251	-10.3008	6.98954e-25	3.54734e-23	5137.23	5445.41	5135.16	4894.57	5036.03	5098.42	3747.22	3837.04	3728.3	3574.71	3953.2	3890.67
Naxe	1175.17	-0.571106	0.0554609	-10.2975	7.23477e-25	3.66125e-23	1456.23	1336.3	1395.27	1461.19	1347.01	1439.31	859.283	1020.93	972.558	934.908	949.706	929.362
Dmrtb1	190.361	1.61219	0.156815	10.2808	8.60007e-25	4.33971e-23	100.005	96.9739	96.2256	85.1653	101.069	83.0941	361.401	234.076	229.723	229.358	281.876	385.369
Oplah	511.108	1.23802	0.120601	10.2654	1.00854e-24	5.07471e-23	343.852	283.81	322.708	296.862	282.296	298.743	795.956	553.679	743.776	669.507	608.852	933.254
Rab40c	1876.03	-0.616204	0.060059	-10.26	1.0674e-24	5.35555e-23	2256.27	2177.39	2469.01	2155.9	2283.64	2286.08	1317.86	1480.98	1617.48	1441.68	1566.36	1459.73
Fnip1	1641.01	-0.555348	0.0541431	-10.257	1.10032e-24	5.50503e-23	2086.4	1994.43	1939.77	2042.75	1819.24	1837.96	1400.84	1380.15	1275.72	1296.42	1270.61	1347.82
Sgsm2	3097.44	-1.12716	0.110044	-10.2429	1.27399e-24	6.35587e-23	3744.01	4629.54	4264.44	4100.1	4060.19	4698.77	1411.76	2465.9	2059.98	2029.27	1933.24	1772.11
Clpb	2202.79	-0.604608	0.0590628	-10.2367	1.35791e-24	6.75543e-23	2559.02	2721.74	2613.35	2838.44	2668.75	2545.25	1567.89	1902.32	1810.48	1856.71	1691.26	1658.25
Pdk2	1065.24	0.846517	0.0829311	10.2075	1.83589e-24	9.10759e-23	743.87	821.693	758.07	674.023	681.345	885.348	1382.28	1300.02	1378.34	1420.93	1208.16	1528.82
Rhou	2663.01	1.11213	0.10897	10.2058	1.86776e-24	9.23966e-23	1486.37	1694.46	1920.99	1608.41	1729.5	1665.84	4030.01	2982.67	3630.38	3283.1	3157.88	4766.51
Arpin	326.736	-0.927567	0.0909652	-10.1969	2.0461e-24	1.00935e-22	446.596	391.128	435.362	446.51	447.841	406.568	186.706	231.375	219.367	206.422	264.53	238.423
Cdk16	9551.76	-0.697278	0.0683923	-10.1953	2.08167e-24	1.02403e-22	11411.5	12398.4	11428.6	11380.5	11690.9	12585.8	6241	8324.1	7305.95	7798.18	7057.31	6998.92
Ulk1	4150.58	0.61226	0.0600788	10.191	2.1762e-24	1.06755e-22	3063.16	3653.33	3235.29	3181.53	3156.67	3397.95	5066.17	4986.72	4888.21	5123.42	4562.06	5492.48
Poglut1	1246.67	-0.641227	0.062949	-10.1864	2.27941e-24	1.11508e-22	1661.72	1450.73	1601.8	1462.41	1556.99	1386.88	926.978	935.403	1034.7	955.659	1047.71	939.093
Slc4a8	3666.78	-0.936447	0.0919369	-10.1858	2.29546e-24	1.11982e-22	4108.41	5607.68	4898.12	4390.88	5097.89	4795.72	2051.58	2863.83	2690.78	2478.16	2641.83	2376.44
Rcor1	781.069	-0.821123	0.0806733	-10.1784	2.47644e-24	1.20477e-22	854.834	1069.3	1092.51	871.12	1099.56	993.172	596.148	557.281	548.888	547.183	539.468	603.355
Anxa7	1842.28	-0.71719	0.0705201	-10.17	2.69881e-24	1.30933e-22	2330.25	2249.15	2368.09	2113.32	2358.57	2329.6	1145.35	1465.67	1492.26	1391.44	1517.79	1345.87
Lrrc8b	5193.57	-1.09986	0.108215	-10.1636	2.88289e-24	1.39479e-22	6446.88	8352.69	6745.18	6462.83	6486.72	8000.77	2735.08	4037.81	3170.93	3019.88	2979.21	3884.83
Dtx3	4908	-0.668084	0.0657556	-10.1601	2.98744e-24	1.44142e-22	6387.97	5550.79	6348.54	6136.77	6105.97	5623.69	3220.95	3922.57	3957.08	3851.03	4070.29	3720.37
Snx32	1518.99	-0.531932	0.0523591	-10.1593	3.0121e-24	1.44934e-22	1954.89	1792.72	1715.63	1769.01	1818.37	1727.17	1183.56	1292.82	1197.57	1317.17	1261.07	1197.95
Acadm	833.223	-1.28677	0.12669	-10.1568	3.09156e-24	1.48353e-22	1248	1168.86	1228.64	1185.01	1129.19	1134.63	369.044	595.093	453.798	516.602	617.526	352.282
Tet1	1741.98	-0.629079	0.0619729	-10.1509	3.28397e-24	1.57158e-22	1948.04	2033.22	2138.09	2009.9	2334.17	2230.68	1237.06	1422.46	1322.79	1385.98	1413.72	1427.62
Phyh	415.226	-1.21106	0.119457	-10.1381	3.74421e-24	1.78697e-22	583.589	579.258	540.976	591.291	564.593	621.227	200.9	338.51	226.899	275.23	263.663	196.577
Scn8a	3765.81	-0.917554	0.090593	-10.1283	4.13746e-24	1.96932e-22	4130.33	6029.84	4719.75	4605.01	4562.92	5495.09	2689.22	2856.63	2492.12	2427.92	2441.48	2739.43
Desi2	1299.38	-0.638343	0.0630457	-10.1251	4.27615e-24	2.02984e-22	1491.85	1661.49	1554.86	1462.41	1742.57	1577.8	938.988	1108.26	1028.11	978.595	1051.18	996.509
Vps26c	1521.89	-1.07081	0.105774	-10.1236	4.34167e-24	2.05541e-22	2256.27	1851.56	2266	2067.08	2231.36	1703.43	873.477	980.418	1119.43	996.07	1143.98	773.657
Cxadr	18594.8	-0.798858	0.0789762	-10.1152	4.73158e-24	2.23399e-22	22729.8	25471.2	22664.7	23863.3	23259.8	23704.6	11062.6	16223.3	13503.8	13631.5	14181.4	12841.7
Col5a2	624.517	1.5597	0.154249	10.1116	4.90891e-24	2.31152e-22	339.742	336.823	296.891	299.295	341.544	282.916	1282.92	632.905	727.771	822.413	942.767	1188.22
Letm1	2602.07	-0.693118	0.068579	-10.1069	5.15129e-24	2.41918e-22	3101.51	3308.1	3132.03	3339.7	3107	3304.97	1729.49	2313.75	1956.41	1963.74	1861.25	2106.88
Bnip3l	4471.49	-0.724846	0.0717349	-10.1045	5.27562e-24	2.47098e-22	6016.72	4954.72	5827.52	5315.53	5516.11	5805.71	3038.61	3367.99	3538.12	3347.54	3856.07	3073.22
Syn2	6380.53	-1.11137	0.110009	-10.1025	5.38463e-24	2.51535e-22	9889.5	7994.53	8713.11	7748.83	8667.54	9326.32	4740.8	3575.06	3723.59	3642.43	3338.28	5206.37
Lss	3270.87	-0.835555	0.0827417	-10.0984	5.61755e-24	2.61721e-22	4242.66	4116.87	4338.37	4062.39	4706.68	3689.77	2086.52	2321.85	2474.23	2331.81	2799.68	2079.63
Cdk20	794.064	1.05054	0.104089	10.0928	5.94723e-24	2.7635e-22	527.422	449.313	570.313	453.809	631.682	470.867	1145.35	902.092	1094.95	946.922	1168.27	1167.78
Cluh	2588.96	-0.854895	0.084757	-10.0864	6.34412e-24	2.94016e-22	3191.93	3761.94	3225.9	3118.27	3189.77	3517.65	1511.12	2215.62	1847.2	1827.22	1787.53	1873.32
Ube2j2	1011.7	-0.473042	0.0469233	-10.0812	6.69176e-24	3.09314e-22	1153.48	1163.69	1178.18	1169.2	1183.21	1208.82	864.743	892.189	821.92	830.058	852.567	822.315
Homez	280.878	-0.933092	0.092577	-10.0791	6.83563e-24	3.15137e-22	382.21	343.288	374.341	354.044	419.088	338.312	229.288	193.563	176.058	191.132	188.207	181.007
Sec13	1901.28	-0.597903	0.0593399	-10.0759	7.06156e-24	3.24703e-22	2354.9	2222.64	2220.23	2376.11	2262.73	2306.85	1342.97	1643.93	1519.56	1526.87	1631.41	1407.18
Hmbs	674.454	0.668992	0.0665307	10.0554	8.69782e-24	3.98899e-22	576.739	514.608	498.73	453.809	555.88	524.284	834.171	778.752	848.282	871.561	823.078	813.556
Ppif	960.156	-0.782586	0.0778915	-10.0471	9.45826e-24	4.32648e-22	1178.14	1259.37	1180.52	1295.73	1206.73	1166.28	616.893	830.069	704.234	764.527	695.584	623.791
Adgrl1	14135.2	-0.771698	0.076839	-10.0431	9.85704e-24	4.49721e-22	16610.4	19242.9	18102.1	16259.3	18243.8	18508.2	8913.84	11651.6	10470.3	9975.99	9777.2	11866.6
Carmil3	5808.55	-0.601853	0.0599564	-10.0382	1.03563e-23	4.71279e-22	7368.84	6672.45	7254.47	6874.06	6608.7	7243.04	4494.04	4980.41	4621.77	4808.88	4776.28	3999.66
Ece1	753.834	-0.882148	0.0879146	-10.0341	1.07895e-23	4.89726e-22	943.88	1058.96	901.235	890.586	926.176	1142.54	447.657	606.797	537.59	537.353	516.05	537.181
Ttf2	92.8559	1.5284	0.152522	10.0209	1.23398e-23	5.58652e-22	39.7279	42.022	51.6333	43.7993	47.9207	61.3314	138.665	120.639	138.399	141.984	118.822	169.329
Cstf2	3306.93	-0.573684	0.0572863	-10.0143	1.31847e-23	5.95372e-22	3878.26	3976.58	4005.1	3889.62	3989.61	3997.42	2467.57	2794.51	2712.43	2752.3	2889.01	2330.7
Cpsf2	3838.95	0.628559	0.0628177	10.0061	1.43312e-23	6.43903e-22	3037.13	2983.56	3146.11	3078.12	3089.58	2758.92	5306.37	4131.44	4553.98	4767.37	4529.1	4685.73
Fgf11	2394.51	-1.16849	0.116778	-10.0061	1.43325e-23	6.43903e-22	3213.85	3074.07	3417.18	2924.82	3736.07	3521.61	1116.96	1688.05	1579.82	1703.8	1634.88	1123.02
Srl	960.37	0.750237	0.075049	9.99662	1.57686e-23	7.06619e-22	639.756	751.225	758.07	611.974	750.176	779.502	1204.31	1147.87	1200.4	1140.24	1196.02	1344.9
Smim10l2a	1294.52	-1.04598	0.104667	-9.99344	1.62833e-23	7.27831e-22	1902.83	1630.46	1678.08	1730.07	1852.35	1675.73	652.924	858.878	879.351	771.08	1108.42	794.093
Foxk2	7252.58	-0.45637	0.045675	-9.9917	1.65716e-23	7.3884e-22	7972.98	8957.81	8440.86	8263.47	8439.27	8262.92	5623.01	6449.69	6161.1	6147.89	6079.85	6232.08
Dgkq	981.988	-0.581429	0.0582354	-9.98413	1.7887e-23	7.95475e-22	1175.4	1135.89	1165.27	1247.06	1162.29	1178.16	875.661	726.535	813.446	741.591	776.243	786.308
Frg2f1	543.718	0.869168	0.087088	9.98034	1.85836e-23	8.24372e-22	387.689	375.612	348.524	396.627	420.831	376.891	774.119	622.102	644.92	768.896	627.933	780.469
Norad	1907.71	-0.827386	0.0829388	-9.97586	1.94415e-23	8.60261e-22	2269.97	2733.37	2312.93	2221.6	2578.13	2522.5	1167.18	1601.62	1297.37	1465.71	1313.98	1408.15
Bcam	152.613	-1.91497	0.191998	-9.97394	1.98211e-23	8.72674e-22	300.014	175.846	212.4	225.08	266.613	268.077	63.3271	88.2286	40.484	80.8214	67.6503	42.8188
Slc38a1	7807.48	-1.25807	0.126135	-9.97401	1.98059e-23	8.72674e-22	8994.94	13649.4	9845.52	11303.9	10368.3	11904.2	3510.29	6046.36	4537.04	4980.35	4606.29	3943.22
Galnt1	2290.75	0.540619	0.05421	9.97268	2.00741e-23	8.81608e-22	1902.83	1816.65	1864.66	1860.25	1986.53	1767.73	2874.83	2508.21	2642.76	2860.42	2836.97	2567.18
Tceal6	1025.37	-1.06434	0.1069	-9.95645	2.36342e-23	1.03538e-21	1391.85	1358.28	1279.1	1352.91	1446.33	1497.67	517.535	849.875	635.505	650.94	758.03	566.375
Cox8a	6120.97	-0.857358	0.0861356	-9.95358	2.4327e-23	1.06308e-21	8837.4	6533.46	8479.59	8295.1	8370.44	6817.67	3779.97	4454.64	4733.81	4427.7	4493.54	4228.35
Rnf144a	1481.32	1.0875	0.109267	9.95267	2.45498e-23	1.07017e-21	950.729	949.698	1063.18	848.003	927.047	948.658	2372.58	1604.32	1838.73	1949.54	1773.65	2549.66
Sdr39u1	1858.34	-0.694769	0.069935	-9.93449	2.9467e-23	1.28134e-21	2569.98	2084.29	2359.87	2236.2	2315	2222.77	1337.51	1392.75	1458.37	1577.11	1491.78	1254.39
Rbbp5	1390.92	0.491898	0.0495601	9.92528	3.23197e-23	1.40193e-21	1075.39	1254.2	1134.76	1150.95	1150.1	1160.35	1645.41	1560.21	1617.48	1677.59	1613.2	1651.44
Dnaaf8	146.631	1.17069	0.117972	9.92342	3.29278e-23	1.4248e-21	95.8949	79.5186	80.9703	118.015	78.4157	91.997	212.91	197.164	193.947	220.621	200.349	189.765
Abat	8203.52	-0.784836	0.0790939	-9.92284	3.3118e-23	1.42951e-21	10810.1	10935.4	9500.52	9184.47	10012.8	11844.9	5473.43	6868.33	5576.44	6351.04	6230.76	5654.02
Tvp23a	1123.13	-0.756241	0.0762329	-9.92014	3.40292e-23	1.46525e-21	1439.79	1408.06	1444.56	1300.6	1435.88	1439.31	659.475	879.585	907.595	811.491	872.515	878.758
Nucks1	5629.22	-0.92299	0.0930725	-9.91689	3.51548e-23	1.51003e-21	7242.8	8028.8	6658.34	6681.83	7060.89	8551.77	3683.89	4426.73	3559.77	3454.57	3576.79	4624.43
Ctnnd1	731.459	0.803925	0.081127	9.90946	3.78687e-23	1.62264e-21	472.625	597.359	483.475	498.825	531.484	605.4	988.121	958.811	839.808	880.298	930.625	990.67
Ppt1	1661.13	-0.63407	0.0640119	-9.9055	3.94e-23	1.68416e-21	2106.95	2206.48	1919.82	1907.7	1954.29	2026.9	1211.95	1416.16	1237.12	1221.06	1305.3	1419.83
Dgkg	915.11	-1.10371	0.111465	-9.90184	4.08691e-23	1.74273e-21	1042.51	1423.58	1206.34	1281.13	1198.02	1342.37	496.79	749.043	527.234	582.133	642.678	489.496
Fnbp1l	22613.9	0.482498	0.0487334	9.90076	4.13143e-23	1.75746e-21	18752.9	19196.3	18588	19536.9	18929.5	18196.6	29092.3	24178.2	25563.3	26401.3	25822.5	27109.1
Hs6st2	1959.56	-0.881569	0.0892872	-9.87341	5.42853e-23	2.30366e-21	2357.64	2805.13	2242.53	2769.09	2366.41	2697.59	1541.69	1516.99	1162.74	1444.96	1212.5	1397.45
Atp11a	2331.69	-0.629246	0.0637432	-9.87157	5.52935e-23	2.3408e-21	2605.6	3114.16	2632.12	2817.76	2748.03	3072.5	1781.89	2009.45	1771.88	1722.37	1828.29	1876.24
Cap1	6994.68	-0.59182	0.0600033	-9.86313	6.0144e-23	2.54004e-21	7988.04	8804.59	8266.01	8088.27	8389.6	8919.76	4922.04	6268.73	5556.67	5542.82	5459.72	5729.93
Sec61a2	1934.65	-0.471691	0.0478352	-9.86076	6.1584e-23	2.58844e-21	2231.61	2288.58	2270.69	2211.86	2311.52	2175.28	1508.93	1728.56	1718.22	1588.03	1592.38	1590.13
Coq9	1460.38	-0.822276	0.0833876	-9.86088	6.15053e-23	2.58844e-21	2000.09	1688.64	1939.77	1882.15	2029.22	1656.94	950.998	1009.23	1125.08	1148.98	1178.68	914.764
Ckmt1	3022.2	-0.654061	0.0663346	-9.86003	6.20307e-23	2.60101e-21	3609.76	3655.27	3677.7	3693.74	3723.87	3816.39	1966.42	2599.14	2396.09	2479.25	2464.03	2184.73
Ankrd13b	4747.44	-0.644575	0.0654065	-9.85492	6.52717e-23	2.7304e-21	5671.5	5574.06	5997.67	6125.82	5867.23	5510.92	3249.34	4072.92	3827.15	3629.32	3399.86	4043.45
Ostf1	307.954	1.14208	0.116019	9.84397	7.27782e-23	3.03719e-21	202.749	188.776	193.625	226.296	186.455	156.296	529.546	365.518	402.957	362.604	423.248	457.382
Fgf10	359.684	1.23745	0.125744	9.84107	7.49131e-23	3.1189e-21	168.501	232.091	233.523	183.714	193.425	271.045	514.26	496.061	559.244	421.582	442.329	600.436
1110004F10Rik	3939.03	-0.468749	0.0476465	-9.83805	7.71896e-23	3.2061e-21	4827.62	4439.47	4458.06	4626.91	4501.06	4593.92	3058.26	3543.55	3263.2	3357.37	3429.35	3169.56
Fgd5	226.485	-1.18171	0.120298	-9.82323	8.94295e-23	3.70575e-21	309.604	279.285	321.534	301.729	366.811	309.624	103.725	141.346	133.691	126.693	177.799	145.973
Usp39	1053.19	-1.19044	0.121231	-9.8196	9.27102e-23	3.83267e-21	1378.15	1492.11	1476.24	1576.78	1491.64	1375.01	452.025	797.658	704.234	643.295	744.153	507.013
Ifit2	236.053	1.21009	0.123288	9.81516	9.68871e-23	3.99597e-21	156.172	111.197	156.073	150.864	162.059	121.673	372.32	270.088	298.452	351.683	320.038	362.013
Chaf1b	105.962	1.79778	0.18327	9.80945	1.0253e-22	4.21883e-21	30.1384	47.194	42.2454	58.3991	54.0197	50.45	216.186	127.841	145.931	126.693	185.605	186.845
Rsph3b	206.908	0.933069	0.0951568	9.80559	1.06518e-22	4.37269e-21	149.322	140.289	159.594	138.698	141.148	125.63	304.625	276.39	257.026	255.571	252.388	282.215
Fbxo44	1709.74	-1.08534	0.110725	-9.80219	1.10175e-22	4.51229e-21	2505.6	2224.58	2287.12	2304.33	2416.94	2208.92	728.262	1258.61	1192.87	1202.49	1183.88	1003.32
Lrrc28	1089.72	0.602688	0.0615692	9.7888	1.25778e-22	5.1394e-21	765.789	937.415	861.337	843.137	915.721	858.639	1354.98	1373.85	1267.24	1377.24	1237.65	1283.59
Kremen1	404.593	1.19257	0.122278	9.75297	1.79154e-22	7.30342e-21	202.749	272.82	224.135	214.13	230.019	329.409	614.71	545.577	560.186	494.758	503.908	662.718
Gpaa1	790.111	-0.687348	0.0704875	-9.75134	1.82042e-22	7.40401e-21	1009.64	973.618	992.767	968.451	1003.72	904.143	574.311	651.811	682.579	520.971	602.781	596.543
Sumf1	506.712	0.879024	0.0901912	9.74623	1.91439e-22	7.76826e-21	356.181	382.724	306.279	352.828	366.811	372.934	756.65	663.515	563.01	633.465	600.179	725.973
Vegfb	1243.64	-0.798419	0.0819631	-9.7412	2.01173e-22	8.14449e-21	1520.62	1567.75	1590.07	1457.54	1657.18	1683.64	717.343	1019.13	906.654	931.631	999.142	872.919
Glt1d1	744.862	-0.954724	0.0980495	-9.73716	2.09317e-22	8.45479e-21	1106.9	798.419	998.634	992.784	1056.87	945.69	501.158	451.046	528.175	536.261	593.241	429.161
Arf2	6635.48	0.641925	0.0659676	9.73092	2.2258e-22	8.96993e-21	5559.16	4885.55	5462.56	5141.55	5480.38	4573.14	8799.19	7152.82	7953.7	8244.88	8288.89	8083.99
Lrrc57	614.932	0.804218	0.0827285	9.72117	2.44944e-22	9.84864e-21	415.088	439.615	458.832	456.243	409.504	506.478	901.865	695.025	708.941	812.583	785.784	789.228
Pik3r1	11402.3	0.652871	0.0671684	9.71992	2.47986e-22	9.94827e-21	7983.93	9875.18	9137.91	7760.99	9109.29	9316.43	13311.8	13417	14065.8	13499.4	14165.8	15184.1
Mlf2	12603.5	-0.482353	0.0496703	-9.71111	2.70383e-22	1.08221e-20	15698	13577.6	14865.7	14810.2	14545.2	14658.2	9594.06	10981.8	10766.9	10483.9	10302.8	10957.7
Stk24	1063.57	-0.616072	0.0634818	-9.70471	2.87902e-22	1.14972e-20	1206.91	1380.91	1240.37	1311.55	1239.84	1342.37	794.864	939.905	844.516	840.98	850.832	769.764
Lsamp	16901.4	-1.14505	0.118078	-9.69738	3.09354e-22	1.23259e-20	20118.7	27764.3	21134.4	22336.4	21489.4	26820.6	7756.48	13546.7	10503.3	10421.6	10301.9	10622.9
Ammecr1l	1132.51	-0.667123	0.0688474	-9.68989	3.32898e-22	1.3234e-20	1239.78	1449.44	1452.77	1445.38	1424.55	1326.54	842.906	962.412	952.787	780.91	854.301	858.321
Pdik1l	1187.09	-0.715704	0.0738794	-9.68747	3.40857e-22	1.35199e-20	1505.55	1436.51	1529.05	1501.34	1618.85	1265.21	884.396	882.286	892.532	843.164	1034.7	851.509
Btbd11	1230.38	-0.690099	0.0712496	-9.68566	3.46951e-22	1.37307e-20	1611.03	1619.46	1422.26	1380.89	1372.27	1707.39	916.059	970.514	916.069	972.042	882.923	993.59
Ift122	1225	0.78601	0.0816289	9.62907	6.02747e-22	2.38004e-20	861.684	962.628	901.235	882.069	884.354	900.186	1686.9	1392.75	1510.15	1474.45	1371.22	1872.35
Dgkz	5796.35	-0.459469	0.0477425	-9.62391	6.33745e-22	2.49684e-20	6920.87	6528.93	6918.86	6797.41	6628.74	6481.34	4402.33	5089.35	5169.72	4920.28	4769.34	4929.02
Ptpn4	3092.52	-0.695407	0.0723007	-9.61827	6.69485e-22	2.63176e-20	4133.07	4198.33	3433.61	3699.82	3443.32	4033.03	2528.72	2534.32	2093.87	2325.25	2366.89	2320
Atg4b	3638.84	0.521118	0.0541907	9.61636	6.82003e-22	2.675e-20	2942.6	2890.47	3139.07	2745.97	3204.59	3006.23	4629.43	3960.38	4360.04	4322.86	4226.41	4238.08
Hlcs	492.083	0.933873	0.0972213	9.60564	7.56831e-22	2.9619e-20	320.563	424.746	314.493	287.129	306.692	367.988	658.384	653.612	611.968	701.181	598.445	659.798
Pld6	86.9806	-2.3033	0.240305	-9.58492	9.25333e-22	3.61331e-20	202.749	103.439	118.522	125.315	197.782	121.673	16.3777	32.4105	31.0691	24.028	45.1002	25.302
Tab1	1627.19	0.718629	0.0749976	9.58202	9.51675e-22	3.70795e-20	1226.08	1278.12	1198.13	1286	1119.6	1271.14	2338.74	1882.51	2059.04	1961.56	1745.9	2159.43
Rimkla	788.147	-0.913111	0.0954432	-9.56707	1.09982e-21	4.27572e-20	1075.39	1052.49	985.726	1009.82	1157.94	897.218	520.811	630.204	500.872	531.893	640.943	454.463
Fank1	343.317	0.706552	0.0738701	9.56479	1.12427e-21	4.36114e-20	269.876	252.132	266.381	264.012	261.386	253.239	433.463	374.521	429.319	435.781	438.859	440.839
Amotl2	1345.5	0.732069	0.0765475	9.5636	1.13735e-21	4.40217e-20	1001.42	956.81	1121.85	963.585	1025.5	999.108	1852.86	1451.27	1720.1	1593.49	1567.23	1892.78
Man1b1	3026.93	0.432303	0.0452221	9.55955	1.18265e-21	4.56746e-20	2475.46	2710.74	2551.15	2526.98	2467.48	2723.31	3572.52	3566.06	3471.27	3331.15	3571.59	3355.43
Mmp16	2772.7	-0.584364	0.0611567	-9.55518	1.23365e-21	4.754e-20	3011.1	3375.34	3285.75	3474.74	3333.54	3479.07	2193.52	2461.4	2194.61	1988.86	2137.92	2336.54
Zbtb40	672.74	0.825556	0.0865588	9.53751	1.463e-21	5.62552e-20	417.828	506.204	458.832	507.342	502.731	515.381	778.487	949.808	906.654	952.382	847.363	729.865
Tmem30a	10789	-0.611384	0.0641092	-9.53661	1.47583e-21	5.66251e-20	14454.1	12548.4	12079.8	13908.7	12213.7	13048.7	8447.62	9498.08	7710.79	8551.78	8645.36	8360.36
Arhgap26	2211.35	-0.947	0.0993494	-9.53201	1.54261e-21	5.90584e-20	2449.43	3485.24	2873.86	2773.96	2824.71	3064.59	1232.69	1825.79	1504.5	1420.93	1599.32	1481.14
Nuf2	63.4188	1.92055	0.201499	9.53133	1.55278e-21	5.93191e-20	42.4677	19.3948	19.9492	24.3329	31.3663	23.7412	121.195	92.73	100.739	96.112	78.058	110.94
Sesn3	4918.38	-0.874613	0.0917718	-9.5303	1.56826e-21	5.97804e-20	5998.91	7605.34	5698.43	5764.48	5856.78	7264.8	3351.97	4117.03	3180.35	3277.64	3450.16	3454.7
Chmp1b	974.683	0.690932	0.072514	9.52826	1.59945e-21	6.08377e-20	806.887	722.779	735.774	714.172	770.216	724.106	1398.66	1070.45	1137.32	1229.8	1141.38	1244.66
Rgs7	2345.2	-1.29505	0.136019	-9.5211	1.71357e-21	6.49508e-20	2634.37	3917.1	3178.97	3314.15	3200.23	3750.12	932.437	1824.89	1397.17	1236.35	1502.18	1254.39
Mfsd1	1051.2	0.658681	0.0691818	9.52102	1.71496e-21	6.49508e-20	801.407	874.705	759.243	880.853	791.127	780.491	1437.96	1248.7	1183.45	1383.79	1205.56	1267.05
Synj1	9140.81	-0.910714	0.0957111	-9.51524	1.81295e-21	6.85148e-20	10359.4	14493.1	10906.4	11785.7	11320.6	12735.2	5668.87	7858.65	6042.48	6400.18	6127.55	5991.71
Gde1	5306.21	-0.367337	0.0386181	-9.51204	1.86962e-21	7.04019e-20	5955.07	5808.09	5920.22	6168.4	6303.75	5716.68	4452.55	4689.62	4619.89	4648.33	4752.87	4639.02
Erbb4	7412.4	-1.02266	0.107513	-9.51197	1.87088e-21	7.04019e-20	10206	9921.08	8621.58	9441.18	8662.32	12754.9	5772.59	5258.6	4162.32	5037.14	4175.24	4935.84
P3h4	231.294	-1.01521	0.106835	-9.5026	2.04706e-21	7.68672e-20	280.835	269.588	332.096	372.294	311.049	292.808	150.675	176.457	159.112	151.813	139.637	139.161
Rexo2	1078.02	-0.836543	0.0880536	-9.50039	2.09107e-21	7.83529e-20	1539.8	1267.77	1399.97	1548.79	1435.01	1104.95	702.057	777.852	793.675	828.966	814.405	723.053
Parva	1511.84	0.59203	0.0623368	9.49728	2.15447e-21	8.05572e-20	1221.97	1245.15	1118.33	1166.76	1195.4	1284	1956.59	1719.56	1636.31	1810.84	1812.68	1974.53
Slc35f6	912.41	-0.977006	0.102893	-9.4954	2.19364e-21	8.18478e-20	1246.63	1238.03	1203.99	1268.96	1098.69	1205.85	448.749	715.732	643.978	712.102	627.066	539.127
Naif1	230.501	0.800206	0.0843167	9.49047	2.29996e-21	8.56333e-20	161.651	162.27	178.369	175.197	162.059	170.145	313.36	300.697	274.915	301.442	274.938	290.973
[truncated: 29,611 more rows]

## Sheet: shDnmt3a
Gene	baseMean	log2FoldChange	lfcSE	stat	pvalue	padj	Luc_1.WTF	Luc_2.WTF	Luc_3.WTF	Luc_1.WTM	Luc_2.WTM	Luc_3.WTM	Dnmt3a_1.WTF	Dnmt3a_2.WTF	Dnmt3a_3.WTF	Dnmt3a_1.WTM	Dnmt3a_2.WTM	Dnmt3a_3.WTM
[truncated: 30,084 more rows]

[truncated: 6 more sheets: shKdm6b, shKmt2c, shMbd5, shMed13l, shSetd5, shTbr1]
