# Supplementary material for: Autism spectrum disorder–risk genes have convergent effects on transcription and neuronal firing patterns in primary neurons
Source: HighWire-hosted journal article supplement (doi:10.1101/gr.280698.125), 2025-10-20
Supplement: Supplemental_Table_S4.xlsx [file Supplemental_Table_S4.xlsx]

## Sheet: Legend
Supplemental Data Table 4. WGCNA modules.

## Sheet: WGCNA_genetomodules
gene_id	colors
Gnai3	grey
Cdc45	grey
H19	pink
Scml2	greenyellow
Apoh	grey
Narf	green
Cav2	grey
Klf6	blue
Scmh1	green
Cox5a	lightyellow
Tbx2	brown
Ngfr	grey
Wnt3	grey
Wnt9a	magenta
Fer	grey
Xpo6	red
Tfe3	tan
Axin2	yellow
Brat1	grey
Gna12	tan
Slc22a18	grey
Pih1d2	grey
Dlat	darkred
Sdhd	greenyellow
Fgf23	grey
Ccnd2	grey
Gpr107	grey
Nalcn	red
Btbd17	grey
Th	grey
Drp2	grey
Lhx2	yellow
Gmpr	grey
Mid2	darkred
Trim25	darkred
Dgke	tan
Scpep1	brown
Mnt	lightcyan
Itgb2	grey
Hddc2	magenta
Tpd52l1	grey
Pemt	grey
Cdh4	magenta
Ckmt1	green
Bcl6b	grey
Comt	grey
Rtca	grey
Dbt	green
Dazap2	green
Mcts1	turquoise
Rnf17	grey
Trappc10	grey60
Ccm2	green
Tbrg4	grey
Mx1	grey
Fap	grey
Gcg	grey
Ndufa9	lightyellow
Egfl6	grey
Lck	grey
Cttnbp2	grey60
Galnt1	magenta
Mkrn2	grey
Pparg	brown
Raf1	yellow
Septin1	grey
Gm4532	grey
Pdgfb	grey
Acvrl1	grey
Tamalin	brown
Acvr1b	darkturquoise
Tom1l2	grey
Zfp385a	grey
Itga5	blue
Gabra2	grey
Wdr77	grey
Atp5pb	turquoise
Sox9	grey
Hnrnpd	grey
Dynlt1c	grey
C1d	turquoise
Gm2a	grey
Krit1	orange
Clcn4	tan
Sema4f	grey
Hk2	pink
Myo18a	yellow
Sez6	grey
Loxl3	grey
Kat2b	grey
Rab5b	salmon
Icosl	grey
Spg7	grey
Rpl13	turquoise
Chmp1a	grey
Rpa1	grey
Serpinf1	grey
Tubgcp3	grey
Oprm1	grey
Polr3d	grey
Tcf7	grey
Ddx3x	grey
Il12rb1	grey
Slc5a5	midnightblue
Kcnn3	grey
Usp32	grey
Car4	grey
Txnrd3	grey
Fasl	grey
Zfp512b	grey
Dnajc5	blue
Tpd52l2	turquoise
Fmr1	grey
Bcl11a	grey
Il4	grey
Pxmp4	grey
Dlg3	magenta
Gnb1l	grey
Dbh	grey
Mmp11	grey
Smarcb1	yellow
Hip1r	grey
Nsun5	grey
Top1mt	pink
Mmp14	purple
Slc7a7	grey
Oxa1l	green
Heatr6	grey
Icam4	grey
Ilf2	turquoise
Chtop	grey
Snapin	turquoise
S100a6	grey
Mapk7	grey
Epn2	blue
B9d1	magenta
Sec24b	blue
N4bp3	pink
Rmnd5b	tan
Nhp2	turquoise
Vps9d1	green
Zfp276	grey
Mfsd10	grey
Luzp1	darkred
Kctd10	grey
Poldip2	grey
Sebox	grey
Ift20	darkorange
Col6a1	grey
Pcbp3	yellow
Lgals9	grey
Araf	turquoise
Cfp	grey
Timp1	grey
Uxt	turquoise
Cnnm3	lightcyan
Lman2l	cyan
Mcm3ap	yellow
Pcnt	grey
Mxd1	grey
Gmcl1	grey
Snrnp27	turquoise
Oas1c	grey
Ocrl	tan
Calm1	grey
Agpat3	red
Sema6b	lightcyan
Uhrf1	grey
Dpp9	yellow
Ramp2	grey
Lsr	grey
Gramd1a	grey
Hpn	grey
Gabrg1	turquoise
Ckb	grey
Sp1	grey
Itgb7	grey
Myg1	grey
Rarg	grey
Pfdn5	turquoise
Efnb2	grey
Rrp15	grey
Rnd2	green
Srr	blue
Sync	grey
Fndc5	grey
Cnn1	grey
Fbxo9	green
Vps50	turquoise
Hars	brown
Zmat2	turquoise
Ube2c	grey
Smg5	grey
Cct3	grey
Glmp	green
Mef2d	tan
Tmem79	grey
Snd1	grey
Col18a1	tan
Slc19a1	grey
Kpnb1	grey
Npepps	cyan
Tbx21	grey
Mrpl10	blue
Cyp51	greenyellow
Tcf25	brown
Tubb6	midnightblue
Def8	grey
Meox1	grey
Nkx2-1	grey
Col1a1	grey
Itga3	midnightblue
Dlx3	salmon
Foxm1	grey
Itfg2	midnightblue
Nrip2	grey
Tulp3	lightyellow
Gtf2h4	pink
Tubb5	purple
Ell2	brown
Jup	blue
Fkbp10	grey
Klhl10	grey
Nom1	grey
Ergic1	lightcyan
Acap1	grey
Tcea3	grey
Ifrd1	brown
Stk38l	grey
Brpf1	grey
Akr1b3	grey
Gstt1	grey
Ddt	black
Ddx18	skyblue
Ubl3	green
Gramd3	grey
Eef1e1	turquoise
Akt1	lightcyan
Cldn15	skyblue
Il16	grey
Tcirg1	grey
Naglu	grey
Coasy	grey
Smo	magenta
Tspan33	grey
Crnkl1	turquoise
Rin2	grey
BC039771	grey
Folh1	grey
Chordc1	turquoise
Rtcb	turquoise
Pwp1	grey
Fbxo7	tan
Capns1	grey
Lrp3	white
Folr1	grey
Clpb	green
Septin7	grey
Zdhhc4	grey
Rac1	grey
Nup214	yellow
Aif1l	magenta
Ltbp1	grey
Ugp2	grey
Kcnh6	pink
Trmt1	grey
Nacc1	grey
Nfix	grey
Slc1a5	pink
Uba1	grey
Siae	grey
Vsig2	purple
Esam	grey
Spa17	grey
Fam50a	grey
Emd	grey
Taco1	darkorange
Grik3	grey
Gria3	darkturquoise
Npas1	grey
Sipa1l2	brown
Ap4e1	grey
Blvra	turquoise
Pdzd4	purple
Srpk3	grey
Idh3g	grey
Pnck	green
Ssr4	turquoise
Bcap31	grey
Fam98a	grey
Ltbp2	brown
Kmt2a	yellow
Ift46	salmon
Tmem25	green
Trappc6a	grey
Supt6	grey60
Spag5	yellow
Unc119	grey
Rab34	turquoise
Sdf2	turquoise
Ccne1	lightyellow
Hsf2bp	grey
Bbc3	black
Mybpc3	grey
Psmc3	black
Acp2	grey
Rapsn	grey
Slc39a13	grey
Celf2	yellow
Nr1h3	grey
Ddb2	salmon
Sf3a1	grey
Stat6	pink
Clgn	grey
Napsa	grey
Vrk3	grey
Smg9	yellow
Paxip1	grey
Rmnd5a	grey
Mov10	grey
Ppm1j	grey
Rhoc	grey
Tead3	grey
Ppard	brown
1810013A23Rik	brown
Def6	salmon
Peg3	grey
Zim1	grey
Metrn	grey
Lmf1	green
Ciao3	grey
Angptl4	pink
Dbf4	brown
Daxx	grey
Cd320	magenta
Ipo4	yellow
Tm9sf1	grey
Rec8	grey
Irf9	grey
Gmpr2	grey
Mdp1	grey
Dhrs1	green
Ncan	yellow
Tmem161a	turquoise
Armc6	blue
Borcs8	black
Slc25a42	grey
Snx9	grey
Ranbp3	grey
Ndufa11	black
Bmp8b	grey
Nr2f6	black
Use1	black
Ocel1	salmon
Dyrk1b	yellow
Braf	grey
Ndufb2	grey
Hltf	grey
Prpf6	grey
Rgs19	lightcyan
Rgs20	grey
Abhd3	grey
Snrpd1	turquoise
Tchp	grey
Tiam1	yellow
Tsc2	yellow
Rpl3l	grey
Slc9a3r2	midnightblue
Puf60	yellow
Golga2	brown
Uck1	yellow
Ikzf4	grey
Mien1	grey
Axl	grey
Tgfb1	grey
Ccdc97	cyan
Zfp40	turquoise
Akap8l	grey
Shh	grey
Pdcd2l	turquoise
Gtf2f1	grey
Clpp	black
Alkbh7	pink
Pspn	grey
Dennd1c	grey
Med6	turquoise
Prkd1	salmon
Lcp2	grey
Cse1l	greenyellow
Naa20	turquoise
Prkra	turquoise
Fkbp7	grey
Plekha3	grey
Ykt6	grey
Baz1b	grey60
Pex6	grey
Mrpl2	black
Mea1	black
Gnmt	grey
Grin2d	green
Kdelr1	grey
Tmem143	grey
Ggct	turquoise
Jag2	grey
Btbd6	yellow
Nudt14	black
Epdr1	grey
Flii	midnightblue
Top3a	grey
Atg4d	black
Qtrt1	black
Plin4	grey
Hdgfl2	grey
Chaf1a	grey
Adprh	grey
Tmem39a	grey
Timmdc1	grey
Pla1a	grey
Mcm2	black
Tpra1	grey
Nab1	brown
Adgre5	grey
Il17ra	grey
Lamb1	grey
Kcnn1	pink
Arrdc2	black
Ppp1r17	grey
Cd36	grey
Map2k7	blue
Timm44	lightyellow
Ap2a2	blue
Pnkp	green
Med25	yellow
Bcam	midnightblue
Clptm1	midnightblue
Relb	grey
Tomm40	grey
Apoe	grey
Hbp1	grey
Prkar2b	grey
Cdkn1b	brown
Klf4	grey
Ap1m1	yellow
Rab8a	skyblue
Hmgn2	magenta
Fam32a	turquoise
Stard3nl	turquoise
Stk11	grey
Efna2	grey
Atp5d	cyan
Ppp5c	grey
Cdk12	grey60
Lipe	grey
Pafah1b2	grey
Tbc1d8	grey
Cnot11	blue
Slc2a3	grey
Foxj2	green
Sri	grey
Dgcr2	blue
Irf3	black
Bcl2l12	grey
Zfp959	turquoise
Mpnd	grey
Sh3gl1	lightcyan
Ebi3	grey
Yju2	grey
Ranbp2	darkgreen
Grk5	yellow
Dvl3	green
Abcf3	grey
Eif2b5	darkred
Cyth2	grey
Sult2b1	brown
Gm5897	brown
Car11	grey
Dlgap1	grey
Plag1	turquoise
Hck	midnightblue
Mrpl4	grey
Keap1	grey
Ap1m2	grey
Glg1	yellow
Atp8b3	grey
Btbd2	white
Csnk1g2	grey
Abhd17a	black
Mob3a	grey
Cacnb3	grey
Ccdc65	blue
Fkbp11	grey
Ddx23	grey
Pld3	midnightblue
Grik5	blue
Rabac1	black
Etv3	brown
Prkcsh	grey
Elavl3	green
Rab3b	brown
St8sia6	grey
Fcgrt	grey
Nosip	grey
Pih1d1	grey
Rps11	black
Supt5	blue
Dll3	black
Paf1	grey
Timm50	grey
Med29	salmon
Bicd1	grey
Ncstn	midnightblue
Pex19	grey
Phyhip	grey
Crhr2	grey
Impdh1	pink
Dusp3	darkred
Prodh	grey
Ess2	blue
Slc25a1	tan
Dgcr6	grey
Ddr1	grey
Ier3	grey
Fosb	brown
Klc4	grey
Ercc1	grey
As3mt	midnightblue
Homer3	grey
Crtc1	grey
Rnf215	grey
Sec14l2	grey
Aven	grey
Cp	grey
Crot	grey
Rps6ka1	pink
Calb2	purple
Snrnp200	blue
Ciao1	turquoise
Has1	grey
Taf6l	black
Gm2518	black
Insig2	grey
Kpna6	grey
Man1a	grey
Itpkc	grey
Coq8b	grey
Brd8	grey
Kif20a	grey
Farsa	black
Gcdh	darkorange
Mast2	tan
Dnase2a	grey
Gm38426	grey
Rad23a	grey
Calr	darkred
Syce2	pink
Nfat5	red
Nob1	grey
Nqo1	grey
Ppfia3	grey
Gys1	pink
Ruvbl2	black
Lin7b	pink
Bax	turquoise
Tfam	turquoise
Zfp81	grey
Efnb3	grey
Mmd	grey
Hlf	lightgreen
Fam162a	pink
Rpl8	black
Grm3	grey
Ssbp2	turquoise
Fancl	turquoise
Brinp2	purple
Gstm5	black
Gstm7	grey
Stat3	grey
Stat5a	grey
Cavin1	grey
Map3k11	lightyellow
Akt2	grey
Dnaja3	grey
Hmox2	darkgrey
Cdip1	brown
Map3k20	brown
Cwc15	turquoise
Col5a3	grey
Dnmt1	grey
Ppan	grey
Angptl2	grey
Cacna1e	yellow
Cacna1b	red
Trmt10a	grey
Etv1	grey
Kifc2	pink
Psap	yellow
Ikbkg	darkgrey
Wars2	grey
Atn1	blue
Phb2	green
Ptpn6	grey
Eno2	green
Emg1	salmon
Lpcat3	green
Atp6v1f	grey
Clcn5	lightgreen
Clcn3	green
Hif3a	grey
Gpx6	grey
Pde1c	brown
Utp20	yellow
9330159F19Rik	darkturquoise
Cul3	brown
Sst	royalblue
Il11	grey
Large1	red
Ddx56	tan
Tmed4	green
Col26a1	grey
Bid	grey
Ralb	grey
Ppp1cc	grey
Ppp1ccb	grey
Dnajb11	brown
Tbccd1	magenta
Clec11a	grey
Zfp324	blue
Gab2	brown
Coro1c	yellow
Tax1bp1	grey
Ndrg2	pink
Mettl17	grey
Arhgef40	grey
Pnpla6	grey
Mcoln1	blue
Arhgef18	midnightblue
Pkn2	darkgreen
Etfb	pink
Stxbp2	green
Pcp2	grey
Sgce	turquoise
Chn2	grey
Wwox	grey
Slbp	grey
Tyr	grey
Aqp1	grey
Arid3b	grey
Cnn2	grey
Polr2e	black
Abca13	grey
Myo9b	grey
Hdac9	brown
Adgre1	grey
Mtfp1	green
Rab23	grey
Rab11a	grey
Eif2b2	grey
Dlst	brown
Pgf	grey
Ulk2	green
Dgkq	red
Chmp2b	grey
Plod3	royalblue
Ap1s1	black
Mapk13	grey
Srpk1	red
Lbr	turquoise
Crabp2	blue
Nes	grey
Bcan	grey
Hapln2	grey
Prcc	green
Rrnad1	grey
Hdgf	cyan
Slc25a18	grey
Thop1	magenta
Apba3	royalblue
Matk	grey
Pias4	grey
Map2k1	green
Sgta	blue
Nmrk2	grey
Tmem242	orange
Dtx2	grey
Hspb1	grey
Rasa4	pink
Syt5	grey
Hnrnpa2b1	grey
Fxyd4	grey
Ccdc130	salmon
Mri1	green
Prkacb	blue
Sgsh	pink
Chd5	yellow
Cstb	greenyellow
Sh2b2	grey
Pex5	grey
Jkamp	turquoise
Cd44	yellow
Slc1a2	darkturquoise
Eif2ak4	brown
Wdr1	grey
Slc2a9	grey
Ccn4	grey
Ndrg1	grey
Man2b1	grey
Klf5	brown
Wdr83	grey
Prdx2	grey
Polr2a	blue
Senp3	greenyellow
Corin	brown
Plekha8	darkgrey
Spc25	turquoise
Dnah2	grey
Ripk4	brown
Ufd1	blue
Zfp287	green
Prlr	grey
Letm1	green
Ubqln1	skyblue
Fgfr4	grey
Cadm3	yellow
Txn2	cyan
Slc1a6	pink
Slc1a3	grey
Crbn	turquoise
Msh6	magenta
Fbxo11	blue
Mlxipl	grey
Tbl2	pink
Bud23	black
Nid1	grey
Mcm5	grey
Hmox1	midnightblue
Mprip	blue
Cic	yellow
Pafah1b3	black
Il27ra	grey
Prkaca	green
Asf1b	grey
Ddx39a	grey
Dnajb1	green
Usp40	grey
Kbtbd4	grey
Celf1	grey
Ndufs3	black
Por	pink
Igf1r	grey
Insr	red
Fcer2a	grey
Atp4a	grey
Trim28	grey
Ube2m	green
Adcy9	red
Mef2c	yellow
Ctr9	blue
Eif4g2	darkturquoise
Irag1	grey
Pcyt1a	red
Zfp592	lightcyan
Psmd4	lightyellow
Tmod4	grey
Insrr	grey
Snx6	turquoise
Mthfd2	cyan
Kit	lightgreen
Tomm40l	green
Nr1i3	grey
Apoa2	lightcyan
Pan2	salmon
Cs	darkred
Ampd3	midnightblue
Bcas2	grey
Ctcf	grey
Pard6a	grey
Agrp	grey
Pvalb	grey
Tfap4	grey
Ranbp1	turquoise
Rfx5	green
Psmb4	black
Slc30a4	blue
Sqor	grey
Bloc1s6	orange
Metap1	grey
Gpr108	magenta
Rsl1d1	turquoise
Cnga2	grey
Apc	yellow
Reep5	red
Ergic3	pink
Uqcc1	grey
Ncoa2	tan
Trh	salmon
Nr2c2	grey
Nr2c1	grey
Smpd4	red
Pex1	grey
Otx1	grey
Kctd20	green
Itgae	grey
Ctns	grey
P2rx5	grey
Shpk	grey
Trpv1	grey
Ephb3	white
Tuft1	grey
Rcn1	magenta
Dnase1	grey
Trap1	lightyellow
Naa60	grey
1700037C18Rik	grey
Gm41410	grey
Ankrd13d	pink
Tyrp1	grey
Tpr	brown
Odr4	turquoise
Prg4	grey
Dhx34	grey
Kptn	green
Napa	grey
Sra1	pink
Atp5g1	cyan
Snf8	yellow
Tbcb	black
Inpp5k	blue
Crkl	red
Eps8l1	blue
Clint1	darkorange
Cdkal1	salmon
Htra1	grey
Zbtb17	grey
Fam131c	midnightblue
Fblim1	grey
Epor	grey
Ccdc159	grey
Mob1b	red
Vax1	grey
Atp6v1b2	tan
Eps15l1	grey
Tep1	grey
Ttc5	turquoise
Osgep	black
Aamp	grey
Tmbim1	grey
Arpc2	turquoise
Kmt2b	yellow
Zbtb32	grey
Upk1a	grey
Tmem147	pink
Rps9	turquoise
Tfpt	grey
Susd2	green
Ggt5	grey
Ggt1	grey
Crip2	blue
Crip1	grey
Cbfa2t3	grey
Fbln1	green
Pgrmc1	grey
Gcat	pink
Tek	blue
Elovl1	blue
Med8	grey
Hyi	grey
Cdc20	grey
Adamts4	grey
Nectin4	grey
Pfdn2	cyan
Rnf114	grey
Steep1	greenyellow
Neurl1a	grey
Srm	blue
Epha2	grey
Rbm14	grey
Actn3	brown
Zdhhc24	blue
Bbs1	purple
Ndor1	grey
Nsmf	grey
Pdk1	pink
Ptbp1	grey
Mvd	grey
Cyba	grey
Itih3	grey
Stimate	grey
Sfmbt1	cyan
Ihh	grey
Atp7b	pink
Rundc3a	green
Slc4a3	midnightblue
Cdt1	grey
Runx1t1	grey
Aprt	lightyellow
Gtf2h1	grey
Hfe	grey
Abhd1	grey
Slc5a6	green
Aplp1	grey
Qrich1	yellow
P4htm	grey
Usp19	grey
Pola1	darkorange
Cdc42	greenyellow
Pknox1	grey
D130043K22Rik	grey
Gmnn	greenyellow
Acot13	magenta
Zfp184	grey
Cyp27b1	grey
Cdk4	magenta
B4galnt1	grey
Mettl1	lightyellow
Tspan31	brown
Kif5b	grey
Saal1	pink
Tph2	brown
Krt23	grey
Cnp	pink
Odad4	magenta
Sulf2	grey
Sod2	greenyellow
Tmco6	black
Stambp	grey
Ezh1	green
Hap1	grey
P3h4	pink
Ctnnb1	grey
Eif1b	magenta
Chrd	midnightblue
Psmd2	grey
Syngr3	blue
Vars	grey
Vwa7	grey
Hspa1l	grey
Msh5	grey
Abhd16a	pink
Neu1	green
Ddah2	grey
Clic1	grey
Lsm2	grey
Pole	grey
Atp1a2	grey
Casq1	grey
Stx1a	blue
Zfp775	grey
Scube2	grey
Mrpl49	grey
Dennd2c	brown
Mark3	grey
Gatad1	grey
Pcdha10	grey
M6pr	greenyellow
Lrrc8a	blue
Mc5r	grey
Ppp2r1a	grey
Fance	black
Tinf2	brown
Tssk4	grey
Hapln4	cyan
Dus3l	grey
Gtpbp3	greenyellow
Tgfbr1	grey
Homer1	grey
Rad51c	grey
Gabrb2	grey
Cav1	purple
Arpp19	red
Bcl2l1	blue
Khsrp	green
Dio2	purple
Ccdc124	black
Cct4	greenyellow
0610009B22Rik	greenyellow
Cpt1c	grey
Twist2	grey
Zfp655	red
Rhoa	blue
Zmiz1	lightcyan
Ankrd26	grey
Aldh16a1	green
Hnrnpa0	grey
Prrg2	salmon
Hnrnph1	grey
Ift43	grey
Id3	grey
Tcap	grey
Arid1a	blue
Crlf1	grey
Ctsd	midnightblue
Rplp1	black
Hmgcll1	grey
Ttc9b	grey
Abhd8	black
Ift22	grey
Fzd3	red
1700008O03Rik	grey
Mid1ip1	brown
Ap2s1	grey
Fgfrl1	purple
Brme1	grey
Fhl2	grey
Emc10	grey
Clstn3	blue
Fbxw9	grey
Fnbp4	lightgreen
Cers4	grey
Scrn3	grey
Phax	grey
Tle1	grey
1700109H08Rik	grey
Relt	grey
Snrpb2	turquoise
Ubc	brown
Prpf31	grey
Sertad1	grey
Carhsp1	magenta
Elk3	yellow
Herpud2	blue
Rdh13	lightcyan
Adam21	grey
Nutf2	greenyellow
Fut1	grey
Arpc5	grey
Elavl2	turquoise
Pou2f2	purple
Mgst1	grey
Nfib	red
Ubqln4	grey
Rbfox1	green
Rps18	turquoise
Rpl10	greenyellow
Rps15a	turquoise
Ncaph2	pink
Hipk1	grey
Gprc5b	purple
Man1a2	grey
Acyp1	turquoise
Hdac5	midnightblue
Rala	tan
Vdac3	greenyellow
Slc1a7	midnightblue
Vps72	magenta
Gabpa	grey
Bmp7	grey
Dynll1	turquoise
Pdcl	grey
Tmem184b	brown
Nf2	grey
Cabp7	grey
Zmat5	magenta
Ewsr1	grey
Ap1b1	grey
Derl3	grey
Gnat2	grey
Bcl2l13	green
Dqx1	grey
Lnpk	grey
Mymk	grey
Fam163b	blue
Ascl2	grey
Rarres2	grey
Pttg1ip	darkgreen
Trpm2	pink
Ube2g2	grey
Lpo	grey
Met	purple
Slc16a12	grey
Syn2	green
Elk1	grey
Nav1	blue
Tnpo1	grey
Rnmt	grey
Kcnq1	grey
Srp14	turquoise
6330409D20Rik	grey
Cdk9	grey
Tor2a	blue
Fpgs	grey
Mrtfb	blue
Cbx5	green
Apobec3	grey
Taf7l	grey
Sardh	grey
Vav2	grey
Tex15	grey
Ppp2cb	turquoise
G0s2	grey
Dmap1	lightcyan
Mcu	purple
Tex11	grey
Bcr	yellow
Fxyd5	grey
Kcnd1	midnightblue
Tfcp2	lightcyan
Pou6f2	grey
Pou6f1	brown
Ubp1	grey
Nuak2	grey
Cilk1	grey
Sdhb	lightyellow
Cox4i2	pink
Snap47	lightyellow
Kdsr	grey
Vps4b	grey
Rps25	turquoise
Nxf2	grey
Tafazzin	grey
Kif19a	grey
Aldh3a2	grey
Zmynd10	grey
Tmem115	grey
Hyal2	black
Ifrd2	grey
Hyal1	grey
Tusc2	grey
Nprl2	green
Slc38a3	purple
Cacna2d2	grey
Rassf1	grey
Epn3	pink
Rnf112	grey
Slc3a2	royalblue
Nxf1	greenyellow
Stx5a	grey
Pifo	grey
Spire2	black
Prox1	grey
Raver1	grey
2610507B11Rik	grey
AI597479	grey
Tmem86a	grey
Optc	grey
Tex14	grey
Ifi35	grey
Rdm1	pink
Nedd8	green
Gosr1	grey
Mrpl52	black
Kansl3	yellow
Eya4	grey
Ebf3	grey
Uckl1os	grey
Myt1	grey
Faf1	grey
Tsacc	grey
Mettl16	grey
Dazl	turquoise
Apol7a	grey
Pigyl	black
Rbm25	grey
Psen2	cyan
Acaa1b	grey
Plcd1	grey
Fads1	green
Lmbr1	lightcyan
Tnfrsf22	pink
Cars	brown
Wnt2	grey
Gabra1	grey
Grid2ip	grey
Kdelr3	brown
Apip	turquoise
Pdhx	grey
Vac14	yellow
Akt1s1	grey
Tbrg1	lightyellow
Adssl1	midnightblue
Cfap161	grey
Brf1	yellow
Vipr2	yellow
Odc1	magenta
Thg1l	salmon
Adam19	grey
Pabpc4	skyblue
Exoc3l2	grey
Zfp296	grey
Plin5	grey
Sugp1	lightcyan
Dhdh	green
Zfp790	grey
Cpb1	grey
Slc25a41	grey
Fsd1	grey
Fuz	grey
Sptbn4	white
Pgam1	grey
Evi5	grey
Evi5l	tan
Snapc2	grey
Git1	cyan
Gltp	grey
Bnip2	grey
Ccnt1	darkturquoise
Scarf2	grey
Brms1l	grey
Med15	midnightblue
Dhdds	blue
Crybg2	pink
Ubxn11	grey
Tjap1	grey
Rpl15	turquoise
Tmem167	grey
Mplkip	turquoise
Kif11	grey
Rpa3	turquoise
Tnpo3	cyan
Ttll5	blue
Zfp715	turquoise
Retn	grey
Cdh23	grey
Rps5	turquoise
Adgrl1	green
Amotl1	grey
Etv5	brown
Tmem190	grey
Gfod2	grey
Enkd1	grey
4933405L10Rik	grey
Atp6v0d1	yellow
Ptprs	yellow
Slc41a1	pink
Iglon5	grey
Igf2bp1	grey
Zfp651	white
Nelfb	blue
Card14	grey
Tmem175	yellow
Tango2	turquoise
Ndufs2	lightyellow
Snx31	grey
Atraid	grey
Cad	grey
Sh3bp5l	yellow
Atad1	turquoise
Pten	red
Pea15a	grey
Timm23	turquoise
Tnfaip8l2	grey
Trnt1	turquoise
Ly6g6e	grey
Ehmt2	midnightblue
Elof1	grey
Med16	grey
St3gal1	purple
Tmem259	midnightblue
Rnf170	grey
Clip3	grey
1700020L13Rik	grey
Dedd	grey
Mcemp1	grey
Nit1	pink
Pax5	blue
Prdm15	blue
Rnf168	grey
Dynlt2b	turquoise
Chp1	grey
Trpv4	grey
Klhl3	green
Tvp23b	grey
Dnajc7	grey
Zfp385c	grey
Cacybp	turquoise
Cluap1	turquoise
Zswim7	black
Pigl	yellow
Ndufa2	black
Pam16	turquoise
Glis2	grey
Cox6c	turquoise
Bicc1	turquoise
Ube2z	blue
Tmem87b	red
Anapc1	green
Mertk	grey
Tsg101	grey
Hps5	blue
Map3k4	grey
Piezo1	pink
Rnf166	grey
Ankrd28	grey
Ankrd52	lightgreen
Pkd2l2	grey
Srp19	orange
Wdfy2	grey
Rbsn	brown
Mrps25	turquoise
Dguok	magenta
Camta1	grey
Csf1	grey
Strip1	grey
Kif1a	tan
Slc25a11	pink
Chrne	royalblue
Cmc2	pink
Chfr	cyan
Ceacam16	grey
Ankrd53	grey
Tex261	grey
Fam120b	grey
Tbp	grey
Psmb1	turquoise
Dll1	grey
Nol3	grey
Fhod1	grey
Plekhg4	grey
Slc9a5	green
Elmo3	lightgreen
Stc1	grey
4931428F04Rik	grey
Tppp3	magenta
Msh3	magenta
Adamts13	pink
Tmem208	turquoise
E2f4	grey
Surf4	brown
Surf2	grey
Dnajb9	grey
Naf1	grey
Yes1	grey
Ppp1cb	grey
Gorasp2	lightgreen
Tsen15	greenyellow
Efr3a	darkred
Trappc2l	turquoise
Acsf3	pink
Ddx19a	grey
Galns	lightcyan
C8g	black
Entpd2	grey
Rabl6	grey
Ptgds	grey
Edf1	grey
Clic3	grey
Npdc1	cyan
Fbxw5	grey
Slc25a13	grey
Ube2i	blue
Tsr3	black
Unkl	grey
Lrrk1	grey
Aldh1a3	purple
Actn1	grey
Sirt2	red
Hnrnpl	magenta
Nolc1	yellow
Casd1	grey
Cnksr3	grey
Mtmr1	grey
Hmgb3	grey
Map2	tan
Cyp2j9	grey
Abca1	purple
Nipsnap3b	darkorange
Lage3	turquoise
Ubl4a	grey
Gm44504	grey
Gdi1	blue
Sash1	yellow
Gadd45b	grey
Slamf1	grey
Zdhhc12	grey
Endog	black
Golga7	grey
Gm6829	grey
Xk	grey60
Pcolce2	grey
Clpx	greenyellow
Trabd	black
Mov10l1	grey
Dennd6b	grey
Cd83	grey
C4a	orange
Ager	grey
Atf6b	grey
Egfl8	grey
Notch4	grey
Ppt2	grey
Prrt1	purple
Rnf5	grey
Fam163a	grey
Cacfd1	grey
Hivep2	yellow
Arnt	red
Itga2	grey
Mocs2	greenyellow
Nat9	grey
Lpl	grey
Atp6v0e	turquoise
Zfp318	blue
Ttbk1	midnightblue
Srf	grey
Lama5	grey
Steap1	grey
Steap2	cyan
Hspa8	lightyellow
Serac1	tan
Pdzd11	grey
Psma2	turquoise
Mrpl32	turquoise
Setdb1	lightcyan
Anxa9	grey
Arnt2	red
Prune1	grey
Cers2	lightcyan
Capza2	turquoise
Plekho1	grey
Vps45	turquoise
Prpf3	grey
Anp32e	green
Aph1a	grey
Tab2	grey
Ppil4	grey
Cnih1	grey
Eps8	brown
Med22	grey
Surf1	turquoise
Med28	turquoise
Qdpr	green
Gnrh1	grey
Tnr	grey60
Sqstm1	green
Nfe2l2	purple
Rxrg	purple
Rxra	grey
Adamtsl4	yellow
Prpsap1	cyan
Fam184b	magenta
Ncapg	grey
Lcorl	turquoise
Gm3414	turquoise
Lta4h	grey
Amdhd1	grey
Dstn	blue
Macroh2a1	grey
Gtf2ird2	green
Bola1	black
Castor2	tan
Ncf1	grey
Wnt11	grey
Adss	grey
Il17rb	grey
Cacna1d	grey
Chdh	grey
Actr8	grey
Lrrc27	grey
Stk32c	grey
Fnta	greenyellow
Mtrex	turquoise
Lbp	grey
Celsr1	grey
Fli1	grey
Stard13	grey
Tenm1	red
Camk1g	tan
Utp25	yellow
Hsd11b1	turquoise
Syt14	blue
H2-M3	pink
Lonrf3	brown
Atp5e	black
Nelfcd	grey
Ctsz	grey
Prelid3b	turquoise
Sertad4	grey
Ube2a	grey
Slc25a5	lightyellow
Atp1b4	brown
Ppdpf	grey
Kcnq2	grey
Eef1a2	grey
Col20a1	grey
Pls3	salmon
Mpped2	grey
Nkap	grey
Ndufa1	grey
Wt1	orange
E2f3	tan
Cr1l	grey
Ppfibp1	grey
Cd46	grey
Cd34	grey
Plgrkt	turquoise
Cd274	grey
Gtf3a	grey
Mtif3	turquoise
Lnx2	salmon
Dyrk3	purple
Mapkapk2	grey
Lamp2	turquoise
Atxn10	grey
Foxred2	red
Eif3d	grey
H3f3b	grey
Nup50	lightcyan
Phf21b	brown
Ift27	purple
Pacsin2	grey
Ttll12	white
Scube1	grey
Tox4	yellow
Mrps18c	turquoise
Sulf1	grey
Srsf6	grey
Plcg1	grey
Kctd2	salmon
Tmprss6	grey
Kctd5	green
Etaa1	turquoise
Matn4	yellow
Sdc4	grey
Il13ra1	grey
Nbr1	blue
Cyth1	grey
Rnd3	salmon
Brca1	salmon
Cntnap1	midnightblue
Nt5c3b	black
Coa3	pink
Med24	yellow
Psmd3	white
Exosc10	grey
Glod4	turquoise
Vps53	grey
Taok1	red
Dnttip1	grey
Acot8	black
Cd300lg	grey
Mpp2	green
Vtn	grey
Nlk	darkturquoise
Traf4	grey
Aldoc	pink
Stac2	midnightblue
Rpl19	turquoise
Nek8	black
Cacnb4	grey
Plxdc1	grey
Arl5b	grey
Zfp207	turquoise
Psmd11	grey
C1qtnf1	salmon
Pipox	grey
Timp2	red
Zc3h18	yellow
Top2b	grey
Rarb	grey
Igfbp4	grey
Cdc6	grey
Suz12	greenyellow
Atad5	grey
Crlf3	magenta
Tnfaip1	grey
Abr	blue
Rab11fip4	grey
Slc35c2	green
Zfp334	yellow
Elmo2	grey
Wsb1	orange
Ttpal	red
Rhot1	green
Rhbdl3	grey
Ada	grey
Serinc3	darkgreen
Tha1	grey
Pgs1	grey
Birc5	grey
Afmid	grey
Pigt	lightcyan
Etv4	grey
Dbndd2	turquoise
Mmp9	blue
Slc12a5	grey
Ghdc	grey
Pltp	green
Slc12a7	grey
Ctsa	grey
Zswim1	midnightblue
Slc12a4	green
Myo1c	brown
Crk	orange
Cox7c	turquoise
Pitpna	blue
Mlx	grey
Retreg3	grey
Jph2	grey
Dhx58	grey
Rab5a	grey
Nkiras2	grey
Ppp2r5c	green
Ift52	blue
Mybl2	grey
Eya2	purple
B4galt5	green
Gdap1l1	grey
Ptgis	grey
Cadps2	blue
Ddx27	grey
Cyth3	cyan
Cyth4	grey
Rac3	black
Rrp7a	green
Cyb5r3	skyblue
Ints2	grey
Med13l	blue
H2bc4	grey
Baiap2l2	brown
Mafk	grey
Med1	yellow
Erbb3	grey
Stard3	magenta
Mfng	grey
Vmp1	grey
Uchl5	grey
Glrx2	red
Ro60	grey
Stk4	blue
Pmp22	grey
Gdf9	salmon
Zcchc10	darkgreen
Psmb6	black
Spag7	grey
Pfn1	grey
Tomm34	grey
Ywhab	grey
Ksr1	grey
Gpx3	grey
Anxa6	grey
Il12rb2	grey
Zkscan6	turquoise
Kpna2	grey
Smurf2	magenta
Cep95	grey
Vezf1	red
2210416O15Rik	grey
Cuedc1	grey
Srsf1	grey
Shroom1	grey
Kif3a	grey
Septin8	grey
Mtmr4	grey
Mrm1	pink
Mapt	green
Kansl1	red
Gid4	green
Myo1b	yellow
Dhx40	grey
Ypel2	grey
Akap1	grey
Nol11	red
Derl2	grey
C1qbp	greenyellow
Rpain	turquoise
6330403K07Rik	grey
Slc13a3	grey
Kcnab3	lightyellow
Chd3	grey
Kdm6b	grey
1700125H20Rik	salmon
Appbp2	grey
Wnt9b	grey
Adora2b	magenta
Ncor1	grey60
Trpv2	midnightblue
Cenpv	magenta
Pcgf2	tan
Cwc25	grey
1700001P01Rik	grey
Pip4k2b	green
Trim37	grey
Ybx2	grey
Ctdnep1	yellow
Elp5	green
Slc2a4	midnightblue
Gabarap	darkgrey
2810408A11Rik	grey
Phf23	lightyellow
Acadvl	lightyellow
Dnah11	grey
G3bp1	grey
Atox1	magenta
Glra2	turquoise
Sparc	grey
Mief2	grey
Crhr1	grey
Dusp14	yellow
Tada2a	grey
Pnpo	grey
Cog1	grey
Cbx1	grey
Cdk5rap3	grey
Copz2	grey
Slc25a39	blue
Sp2	yellow
Aatf	grey
Lhx1	grey
Dync1h1	grey60
Cpsf4l	grey
Pex12	grey
Ndel1	brown
Slc25a35	green
Zbtb4	red
Mpdu1	lightyellow
Fxr2	green
Atp5g3	lightyellow
Cd68	brown
Slc35g3	red
Acsl1	grey
Abca5	brown
Smyd4	grey
Lsp1	grey
Zfyve27	grey
Avpi1	pink
Myh11	grey
Rad51d	grey
Fndc8	grey
Unc45b	grey
Pank3	green
Rars	grey
Wwc1	purple
Mrpl58	grey
Fdxr	grey
Otop3	grey
Sult4a1	cyan
Mrpl45	black
Mb	grey
Irf1	black
Slc22a5	black
P4ha2	pink
Arrb1	red
Tm4sf5	grey
Cxcl16	grey
Pelp1	yellow
Med11	grey
Natd1	blue
Map2k3	grey
Ywhah	green
Sart3	grey
E2f2	grey
Nars2	grey
Slc35b4	grey
Dnah1	grey
Dalrd3	magenta
Fis1	black
Plod1	grey
Rab3d	green
Mfsd3	grey
Slc25a22	blue
Atp6ap1	grey
Dnase1l1	grey
Aldh3a1	turquoise
Scrn1	red
BC005537	brown
Isyna1	black
Hars2	grey
Cacng2	skyblue
Tmem160	black
Rab5c	pink
Mdh2	green
H13	yellow
Rnf145	grey
Scn1b	grey
Atp6v1e1	grey
Chtf18	grey
Lhx9	grey
Rps6kl1	magenta
Ppp1r12c	cyan
Ahr	green
Map1s	white
Tmem129	grey
Nop9	grey
Hsd17b1	grey
Atp6v0a1	red
Psmc3ip	grey
Grb7	grey
Noxo1	grey
Zfp687	green
Gdpd2	grey
D8Ertd738e	grey
Calm3	grey
Cops3	turquoise
Fkbp8	black
Ddx39b	grey
Gipc1	green
Tlcd1	turquoise
Plscr3	grey
Ptger1	midnightblue
Arhgef25	pink
Xab2	grey
Cdc37	cyan
Rab4a	grey
Trip10	grey
Cops6	black
Ubb	black
Ap4m1	grey
Gyg	green
Rcn3	pink
Slc6a8	brown
Arid3a	grey
Pdk4	grey
Ubxn6	grey
Mydgf	grey
Cyb561	grey
Sema6a	tan
Ccdc12	grey
Fmc1	pink
Akt3	grey
Mrpl24	black
Gle1	grey
L3hypdh	grey
Lyst	blue
Slc35e1	grey
Calr3	grey
Tmc4	grey
Syne4	grey
Polr2i	black
Krt10	grey
Iyd	brown
Rmnd1	green
Ccdc170	grey
Esr1	grey
Vip	grey
Fbxo5	grey
Mtrf1l	greenyellow
Rgs17	greenyellow
Hdac2	turquoise
Rwdd1	turquoise
Clvs2	grey
Trdn	grey
Hey2	grey
Stxbp5	grey
Hint3	grey
Trmt11	turquoise
Katna1	grey
Pcmt1	green
Lrp11	blue
Mtres1	lightyellow
Sec63	grey
Nr2e1	grey
Snx3	grey
Aig1	red
Adat2	grey
Pex3	grey
Fuca2	grey
Cep57l1	turquoise
Ltv1	cyan
Plagl1	brown
Cd164	grey
Utrn	yellow
Smpd2	grey
Mical1	pink
Zbtb24	grey
Grm1	grey
Wasf1	purple
Rab32	grey
Gtf3c6	turquoise
Slc16a10	grey
Rev3l	red
Traf3ip2	blue
Fyn	darkturquoise
Tube1	grey
Lama4	brown
Popdc3	brown
Prep	grey
Tnfaip3	grey
Perp	grey
Arfgef3	blue
Hebp2	grey
Reps1	grey
Fam184a	grey
Asf1a	turquoise
Gopc	grey
Qrsl1	grey
Rtn4ip1	green
Nmbr	grey
1700016L04Rik	grey
Crybg1	grey
Vta1	blue
Smpdl3a	grey
Reep3	grey
Fabp7	grey
Pkib	grey
Serinc1	grey
Hsf2	grey
Rspo3	grey
Echdc1	grey
Mgat4c	turquoise
Ptprk	brown
Nts	turquoise
Dcbld1	black
Lrriq1	grey
Slc6a15	grey
Ccdc59	turquoise
Lama2	grey
Lin7a	lightgreen
Ppp1r12a	grey60
Sim1	brown
P4ha1	pink
Septin10	turquoise
Lims1	grey
Zwint	grey
Ube2d1	grey
Dcn	greenyellow
Slc17a8	grey
Epyc	grey
Cdk1	grey
Atp2b1	grey60
Rhobtb1	tan
Cabcoco1	grey
Arid5b	yellow
Actr6	turquoise
Uhrf1bp1l	grey
Poc1b	grey
Dusp6	brown
Tmpo	turquoise
Kitl	grey
Psen1	blue
Sgk1	grey
Cep290	grey
Ikbip	turquoise
Hbs1l	blue
Epb41l2	yellow
Apaf1	grey
Myb	grey
Med23	blue
Ahi1	greenyellow
Arg1	brown
Nedd1	turquoise
Enpp3	grey
Pde7b	grey
Mtfr2	grey
Map7	grey
Ccn2	grey
Stx7	red
Moxd1	grey
Pex7	turquoise
Ifngr1	grey
Cfap54	grey
Cdk17	grey
Hal	grey
Snrpf	black
Ntn4	salmon
Fgd6	grey60
Ndufa12	turquoise
Tmcc3	grey
Cep83	turquoise
Socs2	turquoise
Nudt4	darkturquoise
Nuak1	brown
Tcp11l2	magenta
Rfx4	purple
Cry1	grey
Btbd11	midnightblue
Timp3	grey
Hsp90b1	grey
Pah	grey
Ascl1	grey
Igf1	grey
Washc3	magenta
Dram1	grey
Sycp3	grey
Mybpc1	grey
Slc5a8	grey
Sirt1	grey
Herc4	grey
Mypn	grey
Hnrnph3	grey
Rufy2	green
Pbld2	grey
Ccar1	grey
Ddx21	grey
Ddx50	grey
Vps26a	greenyellow
Supv3l1	grey
Hkdc1	grey
Fam241b	orange
Aifm2	grey
Macroh2a2	grey
Tysnd1	grey
Sar1a	lightgreen
Ppa1	greenyellow
Npffr1	grey
Eif4ebp2	grey
Pald1	pink
Tbata	grey
Sgpl1	cyan
Pcbd1	pink
Unc5b	grey
Slc29a3	grey
Vsir	grey
Slc16a7	yellow
Lrig3	grey
Anapc16	salmon
Ddit4	pink
Dnajb12	grey
Micu1	green
Cand1	grey
Tbk1	red
[truncated: 13,738 more rows]
