# Supplementary material for: Autism spectrum disorder–risk genes have convergent effects on transcription and neuronal firing patterns in primary neurons
Source: HighWire-hosted journal article supplement (doi:10.1101/gr.280698.125), 2025-10-20
Supplement: Supplemental_Table_S5.xlsx [file Supplemental_Table_S5.xlsx]

## Sheet: Legend
Supplemental Data Table 5. Limma voom analysis of depletions.

## Sheet: limma_LMfit_complete
	logFC	AveExpr	t	P.Value	adj.P.Val	B
Tmem230	4.09474	4.23156	9.67773	1.02244e-13	1.74592e-09	20.3985
Ankrd29	-6.85706	4.08984	-9.24373	5.23e-13	4.46537e-09	18.9403
Sae1	2.38546	7.18983	9.10862	8.72338e-13	4.96535e-09	18.7473
Necab2	-3.57737	5.41861	-8.54026	7.62176e-12	3.25373e-08	16.6437
Xpc	3.13817	4.28726	8.44493	1.09872e-11	3.75236e-08	16.1219
Zbtb4	-3.80829	6.59692	-8.09217	4.27076e-11	1.21546e-07	15.0437
Ocrl	-3.49195	6.02639	-7.93978	7.69074e-11	1.8761e-07	14.4758
Zeb1	-3.67725	4.59175	-7.64814	2.37554e-10	3.91214e-07	13.3412
Cd99l2	-3.26353	7.18219	-7.70553	1.90245e-10	3.91214e-07	13.6237
Kcnd3	-3.4124	6.51503	-7.63662	2.48379e-10	3.91214e-07	13.3659
Ei24	-2.78023	6.85266	-7.63287	2.52012e-10	3.91214e-07	13.353
Sfrp1	-3.41064	5.95737	-7.60015	2.86042e-10	4.07037e-07	13.2243
Grin3a	-2.99826	5.69351	-7.23304	1.18526e-09	1.55689e-06	11.8681
Dnmt3a	-3.22638	8.35706	-7.17251	1.49832e-09	1.61866e-06	11.6556
Knop1	-2.9442	5.66694	-7.16937	1.51666e-09	1.61866e-06	11.632
Sox1ot	-4.14802	4.80872	-7.18152	1.44698e-09	1.61866e-06	11.6523
Aqp11	-4.68043	4.06554	-7.09342	2.03499e-09	2.04409e-06	11.2703
Fam210b	-4.5867	5.18071	-7.04377	2.46602e-09	2.33943e-06	11.1541
Pole3	3.58034	4.47986	6.98441	3.10256e-09	2.78838e-06	10.89
Rab2b	-3.21025	3.33296	-6.95443	3.48399e-09	2.79757e-06	10.625
Polr3g	5.79151	2.43168	6.93784	3.71482e-09	2.79757e-06	9.99209
Tmem250-ps	2.70038	4.75213	6.93415	3.7681e-09	2.79757e-06	10.7315
Gm2115	-8.82264	2.93399	-6.94075	3.67328e-09	2.79757e-06	10.5097
4931428F04Rik	2.40895	6.98757	6.87567	4.72384e-09	3.10678e-06	10.5568
Thrb	-4.05877	5.22606	-6.89161	4.44167e-09	3.10678e-06	10.6024
Myh8	-9.03405	3.33164	-6.86207	4.97858e-09	3.10678e-06	10.3187
Abat	-3.50945	7.84902	-6.87455	4.74421e-09	3.10678e-06	10.554
Hipk2	-4.84826	5.17277	-6.85613	5.09428e-09	3.10678e-06	10.4718
Gpd2	-3.27051	6.30577	-6.81669	5.93242e-09	3.49317e-06	10.3383
Epb41l3	-2.68703	7.03491	-6.78989	6.57934e-09	3.62415e-06	10.2408
Mmd2	-4.02316	6.11327	-6.7927	6.50823e-09	3.62415e-06	10.2481
1700037H04Rik	2.53944	6.23333	6.69435	9.51199e-09	4.92202e-06	9.88717
Igdcc4	-3.59453	5.41165	-6.69874	9.35227e-09	4.92202e-06	9.89779
Gng12	-3.38909	4.07066	-6.67075	1.0418e-08	5.23228e-06	9.74351
Cnr1	-3.20226	8.10105	-6.65417	1.11057e-08	5.41832e-06	9.74143
Tmtc4	2.77488	4.54171	6.6444	1.15318e-08	5.46991e-06	9.66511
Hcn3	-2.92715	6.19603	-6.61997	1.267e-08	5.84738e-06	9.61427
Trp53inp2	-5.47071	7.89194	-6.61274	1.30277e-08	5.85422e-06	9.58887
Twnk	2.42164	4.25263	6.59979	1.3694e-08	5.95593e-06	9.48397
AI504432	-4.99811	5.50847	-6.59495	1.39516e-08	5.95593e-06	9.51959
Snap29	2.831	6.10429	6.58184	1.46739e-08	6.11151e-06	9.47344
Nudt16l1	2.66583	5.36464	6.57385	1.51319e-08	6.11358e-06	9.43844
Cplx2	-3.22099	8.52966	-6.56938	1.53949e-08	6.11358e-06	9.42942
Rpl7l1	2.17124	5.77304	6.51114	1.92611e-08	7.47507e-06	9.21321
Srxn1	-2.5086	5.51518	-6.50445	1.97628e-08	7.49931e-06	9.18804
Elavl3	-2.62942	8.74933	-6.45196	2.41798e-08	8.29978e-06	8.99803
Ppt2	2.90998	3.52355	6.45977	2.3465e-08	8.29978e-06	8.88291
Phtf2	3.09582	5.43504	6.46886	2.26599e-08	8.29978e-06	9.05539
Rimoc1	-3.31281	6.49213	-6.45472	2.39249e-08	8.29978e-06	9.00817
Shisa6	-4.38535	3.98127	-6.45064	2.43025e-08	8.29978e-06	8.94563
Aggf1	2.15561	5.94639	6.41663	2.76928e-08	9.12712e-06	8.86812
Syt13	-3.47114	5.70049	-6.41568	2.7794e-08	9.12712e-06	8.86454
Ivd	-2.18625	5.6359	-6.3924	3.03914e-08	9.79175e-06	8.77924
Tab2	-2.63062	6.06049	-6.3294	3.86941e-08	1.15919e-05	8.54965
Bcat2	2.5743	4.48714	6.33334	3.81143e-08	1.15919e-05	8.53992
Syt1	-4.16983	9.90765	-6.33765	3.74908e-08	1.15919e-05	8.57906
Spock2	-2.98013	9.15405	-6.34206	3.68619e-08	1.15919e-05	8.59517
Mesd	2.42698	5.44309	6.32443	3.94379e-08	1.16111e-05	8.52966
Arfgef3	-5.48148	6.71613	-6.31711	4.05595e-08	1.17389e-05	8.50449
Thbs1	-4.3968	4.03892	-6.28579	4.57282e-08	1.30142e-05	8.35432
Sumf1	3.2797	3.67524	6.27284	4.8051e-08	1.34511e-05	8.24504
Acap2	-2.7395	6.06544	-6.25369	5.17025e-08	1.42399e-05	8.27344
Mknk2	2.68258	6.40117	6.24871	5.26974e-08	1.42835e-05	8.25518
Arhgap26	-3.07588	6.0557	-6.20134	6.31552e-08	1.68506e-05	8.08279
Tspyl5	-2.00073	6.03391	-6.196	6.44567e-08	1.69333e-05	8.06339
Synj1	-3.39902	8.05763	-6.18441	6.73748e-08	1.69741e-05	8.01934
Ints14	-1.90238	4.68019	-6.18851	6.63291e-08	1.69741e-05	8.02879
Pde3a	-4.86947	4.03237	-6.18356	6.75941e-08	1.69741e-05	7.99325
Slc1a2	-3.65549	7.64162	-6.14104	7.95e-08	1.948e-05	7.86162
Lactb	2.51079	3.80358	6.13987	7.98546e-08	1.948e-05	7.79859
Micall1	-3.79036	5.50876	-6.10477	9.12869e-08	2.19551e-05	7.73289
Nab1	-3.68744	5.86689	-6.0826	9.93301e-08	2.34113e-05	7.65171
Dync1li2	1.89274	7.99478	6.08062	1.00083e-07	2.34113e-05	7.64172
Ccng2	2.88635	5.69002	6.06798	1.05015e-07	2.4233e-05	7.59982
Slc22a23	-2.98932	6.56925	-6.05982	1.08327e-07	2.46639e-05	7.56778
Ptpn12	2.06703	5.48891	6.04413	1.14991e-07	2.58367e-05	7.51388
Slc36a4	-3.31026	6.23518	-6.0197	1.26182e-07	2.7983e-05	7.42296
Dusp18	-2.72895	4.94307	-6.0002	1.35883e-07	2.97479e-05	7.35518
Npc2	2.00624	6.27206	5.98703	1.42852e-07	3.08777e-05	7.3051
Syt17	-3.46876	4.77932	-5.9807	1.46329e-07	3.12338e-05	7.28474
Srl	2.75282	4.62561	5.94525	1.67392e-07	3.28551e-05	7.15307
Cul4a	1.56649	6.30152	5.96034	1.58078e-07	3.28551e-05	7.20844
Fam214b	2.87162	5.31623	5.94605	1.66882e-07	3.28551e-05	7.16089
Lasp1	-2.83769	7.10049	-5.96156	1.57349e-07	3.28551e-05	7.2111
Iqsec3	-3.42226	6.65264	-5.95661	1.60333e-07	3.28551e-05	7.19391
Maneal	-2.1532	5.90943	-5.94641	1.66659e-07	3.28551e-05	7.1591
Rcan3	-3.31706	6.89005	-5.95157	1.63426e-07	3.28551e-05	7.17512
Vrk3	2.69363	4.28158	5.93968	1.70962e-07	3.31744e-05	7.12245
Cfap410	2.58555	4.84923	5.92557	1.80351e-07	3.46031e-05	7.08622
Ppm1e	-2.76595	8.25696	-5.92209	1.82747e-07	3.46732e-05	7.06678
Clns1a	1.75378	6.04788	5.91303	1.89128e-07	3.54896e-05	7.03865
Ryk	3.09118	4.89206	5.90803	1.9274e-07	3.57742e-05	7.02377
Hras	-2.6532	6.94202	-5.90368	1.95947e-07	3.59785e-05	7.0025
Ybx3	2.44989	5.93291	5.88476	2.10487e-07	3.8237e-05	6.93765
Scn3a	-2.72474	6.3499	-5.86822	2.24081e-07	4.0278e-05	6.87549
Pcdh10	-2.29051	7.70598	-5.86066	2.3058e-07	4.10144e-05	6.84557
Ahcyl2	-2.59873	6.44004	-5.8409	2.48454e-07	4.37382e-05	6.77719
Hipk1	-3.05295	6.21859	-5.8358	2.53287e-07	4.38059e-05	6.75938
L3mbtl1	-3.09053	3.60995	-5.83365	2.55352e-07	4.38059e-05	6.72334
St6galnac5	4.01785	5.41112	5.83243	2.56535e-07	4.38059e-05	6.75338
Cap1	-2.05109	7.69535	-5.81782	2.71079e-07	4.58311e-05	6.69135
Nat8l	2.65021	6.86711	5.80375	2.85864e-07	4.78569e-05	6.64263
Pabpc4	-2.18438	5.45514	-5.79194	2.98884e-07	4.95509e-05	6.6067
Ctnnd2	-2.75605	7.8485	-5.77565	3.17817e-07	5.16862e-05	6.53943
Chrna4	-3.86695	4.95977	-5.77685	3.16389e-07	5.16862e-05	6.55571
Tomm34	2.38745	5.47803	5.76657	3.28877e-07	5.2485e-05	6.51693
G3bp1	1.58892	6.87441	5.76871	3.26244e-07	5.2485e-05	6.51661
Egfr	-5.20763	3.78309	-5.74846	3.52095e-07	5.55005e-05	6.43569
Ntrk2	-3.2399	9.06079	-5.74682	3.54272e-07	5.55005e-05	6.435
Ccnd1	-5.00428	3.2041	-5.73971	3.6389e-07	5.64889e-05	6.35364
Tubb4a	-2.74198	8.24069	-5.71752	3.95569e-07	6.08534e-05	6.33044
Slc22a17	-2.55807	8.54203	-5.71156	4.04528e-07	6.16761e-05	6.30868
Tmod2	-3.06238	9.52709	-5.70255	4.18464e-07	6.26815e-05	6.2762
Atxn7l3	-1.86329	7.56001	-5.7029	4.17909e-07	6.26815e-05	6.27891
Cygb	-3.33876	4.81011	-5.68667	4.44186e-07	6.59559e-05	6.236
Capzb	1.56063	7.78303	5.65399	5.02156e-07	7.33385e-05	6.10372
Armt1	3.30361	3.17548	5.65381	5.02495e-07	7.33385e-05	6.02022
Cdr2l	-4.16351	4.78989	-5.64669	5.1609e-07	7.46844e-05	6.094
Trim36	-2.75396	3.7388	-5.63115	5.47041e-07	7.83249e-05	6.02468
Taf9b	-3.05946	5.22947	-5.62951	5.50421e-07	7.83249e-05	6.02926
Dnm3	-2.71108	6.97938	-5.6257	5.58331e-07	7.87938e-05	6.00427
Manbal	-2.31456	5.24046	-5.62324	5.63491e-07	7.88702e-05	6.00677
Ncoa1	-2.84503	6.17291	-5.61106	5.89784e-07	8.18792e-05	5.95583
Dgkg	-3.23628	4.82138	-5.60415	6.05249e-07	8.33487e-05	5.94317
Ccdc85a	-2.64033	5.95657	-5.5723	6.81816e-07	9.31416e-05	5.81848
F2r	3.66309	3.75575	5.55494	7.27492e-07	9.85925e-05	5.74601
Cdc42se1	2.2338	6.2061	5.54154	7.64811e-07	0.000102834	5.70913
Atp2b3	-2.40797	5.88215	-5.53824	7.7429e-07	0.000103295	5.6985
Adcy1	-2.87903	10.0257	-5.53348	7.88179e-07	0.000104333	5.67307
Itgb1	2.51826	6.82412	5.53105	7.95353e-07	0.000104473	5.66845
Minpp1	2.37086	5.3442	5.52146	8.243e-07	0.000107448	5.64737
Zcchc2	-3.26618	4.9653	-5.51804	8.34882e-07	0.000108003	5.6376
Abcd1	-2.62385	4.09364	-5.51402	8.47483e-07	0.000108809	5.62685
Top2a	-8.82512	0.393893	-5.50723	8.69221e-07	0.000110767	4.34939
Mccc1	2.28339	4.0435	5.50326	8.82166e-07	0.000111584	5.58485
Tlcd3a	2.6576	3.80639	5.49611	9.05994e-07	0.000113755	5.55004
Me3	-3.09115	4.00787	-5.47827	9.68204e-07	0.000120068	5.50173
Cntnap2	-2.38991	7.69586	-5.47768	9.70332e-07	0.000120068	5.47623
Hlcs	2.8707	3.55362	5.46282	1.02548e-06	0.000125979	5.41762
Ablim3	-2.47203	7.12751	-5.45449	1.05774e-06	0.000129014	5.39553
Hsdl1	-2.28715	6.79071	-5.45202	1.06748e-06	0.000129279	5.38821
Nmt1	1.61033	6.99526	5.44439	1.09816e-06	0.000132058	5.3608
Gpr45	-2.64574	4.01734	-5.43669	1.13002e-06	0.000134939	5.35722
Syt9	-2.16346	5.18196	-5.43358	1.14318e-06	0.000135562	5.33768
Ercc6l2	2.89462	4.16269	5.42339	1.18722e-06	0.000139111	5.30945
Chml	-4.11611	5.53426	-5.4229	1.1894e-06	0.000139111	5.29474
Cmtm6	3.27501	3.16891	5.40814	1.25632e-06	0.000145939	5.1879
Cyb561	1.78332	6.07767	5.38058	1.39143e-06	0.000160541	5.14119
Slc25a1	-3.68831	6.62041	-5.37611	1.41465e-06	0.000162125	5.12233
Heg1	-4.18126	3.01452	-5.37157	1.43863e-06	0.000163774	5.08372
Igf1	-5.08824	6.1734	-5.36646	1.4661e-06	0.000165795	5.08967
Emp2	-3.42879	3.36375	-5.35825	1.51132e-06	0.000166912	5.06628
Xpr1	-2.66318	7.77757	-5.36209	1.49001e-06	0.000166912	5.06795
Lamp5	-7.09717	2.33267	-5.36025	1.50017e-06	0.000166912	4.9477
Mtus1	3.03408	4.33547	5.35758	1.51507e-06	0.000166912	5.08395
Arf6	-2.21059	6.36837	-5.35124	1.55101e-06	0.000169776	5.03485
Tafa5	-2.09365	6.23448	-5.34566	1.58332e-06	0.000172209	5.0161
Steap2	-3.54837	3.32431	-5.31102	1.79939e-06	0.00019447	4.90338
Sv2a	-2.14428	9.3955	-5.29249	1.92666e-06	0.000206916	4.82187
Lztr1	1.63889	7.56382	5.28857	1.95468e-06	0.000207318	4.81068
Col19a1	-6.99697	3.84464	-5.29016	1.94328e-06	0.000207318	4.8504
Mitd1	3.64302	2.22398	5.28046	2.014e-06	0.000212291	4.56392
Amfr	-1.35721	7.39039	-5.27152	2.08142e-06	0.000218051	4.75108
Clcn2	-2.13758	4.99846	-5.26542	2.12866e-06	0.000220297	4.75291
Pim2	1.74058	5.2501	5.26665	2.11901e-06	0.000220297	4.75531
Chrd	-3.56541	3.26053	-5.21928	2.52212e-06	0.000259444	4.58997
Mapkapk2	2.06877	4.97781	5.20826	2.62618e-06	0.00026853	4.55911
Rtl6	-2.24047	6.62017	-5.19605	2.74647e-06	0.000279159	4.49082
Rgs8	-2.59665	6.19446	-5.1884	2.82453e-06	0.000285394	4.46809
Slc39a6	-2.35662	7.09262	-5.18442	2.86603e-06	0.000286201	4.44876
Kcna3	-5.06931	3.6232	-5.18463	2.86381e-06	0.000286201	4.48729
Ttc27	2.1916	4.65627	5.17579	2.95805e-06	0.000286998	4.45383
Stk11ip	2.37721	5.53037	5.17784	2.93592e-06	0.000286998	4.44241
Ubash3b	-2.69761	5.98638	-5.1791	2.92239e-06	0.000286998	4.43692
Jam2	-4.3949	2.98088	-5.17608	2.95489e-06	0.000286998	4.42478
Mex3a	2.42811	5.8068	5.1808	2.90431e-06	0.000286998	4.44764
Ski	-2.24998	7.03653	-5.16822	3.04123e-06	0.000293402	4.39192
Dstyk	1.90469	5.88431	5.1579	3.1582e-06	0.000302975	4.36672
Bmi1	-2.69122	5.577	-5.15225	3.2241e-06	0.000304383	4.34932
Ttl	-2.30198	7.05464	-5.15206	3.22635e-06	0.000304383	4.33581
Gne	-1.84596	5.12085	-5.15213	3.22559e-06	0.000304383	4.358
Nudt5	2.7447	4.3904	5.14713	3.285e-06	0.000308213	4.36065
Hipk4	-4.88404	1.01444	-5.13345	3.45342e-06	0.000322244	3.71912
Kcnq2	1.92172	8.87303	5.13158	3.47715e-06	0.000322695	4.26078
Msh3	2.37469	4.22377	5.12823	3.51989e-06	0.000324895	4.2973
Ago1	-2.92909	6.67015	-5.12359	3.58005e-06	0.000328672	4.23883
Arsb	-3.12558	3.82069	-5.11386	3.7094e-06	0.000338726	4.24882
Miga1	2.58683	6.20685	5.09322	3.99935e-06	0.00036326	4.1391
Cnot8	1.68473	5.76397	5.07716	4.24021e-06	0.0003831	4.08899
Xxylt1	-2.14243	5.04474	-5.0713	4.33157e-06	0.000389294	4.08373
Slc32a1	-3.87765	6.93287	-5.06576	4.41968e-06	0.000393075	4.03743
Rcan2	-4.7755	7.61087	-5.06666	4.40533e-06	0.000393075	4.03822
Zfp975	4.9768	1.91895	5.055	4.59602e-06	0.000406641	3.72388
Mid2	-3.31789	5.32445	-5.04213	4.81602e-06	0.000413258	3.97383
Smarcc2	-1.42842	8.05569	-5.04234	4.81236e-06	0.000413258	3.95322
Ak2	2.33068	4.85015	5.04637	4.74242e-06	0.000413258	4.00642
Plch2	-2.47246	5.83214	-5.04355	4.79123e-06	0.000413258	3.96983
Vstm2a	-2.57613	7.14451	-5.04216	4.81554e-06	0.000413258	3.95539
Nalf2	3.06535	4.40698	5.04257	4.80833e-06	0.000413258	4.00451
Eif5a2	2.77399	5.95279	5.03739	4.89958e-06	0.000418326	3.95004
Samd4	-2.69208	5.07967	-5.03331	4.97267e-06	0.000420363	3.95095
Aldh2	-2.30087	5.35339	-5.03457	4.95008e-06	0.000420363	3.94793
Odc1	1.62261	7.02012	5.02874	5.05582e-06	0.000423202	3.91033
Slc6a7	-3.27654	5.65854	-5.02913	5.04866e-06	0.000423202	3.92355
Hapln1	-7.2074	6.49695	-5.012	5.37234e-06	0.000446917	3.85463
Lpgat1	-4.31117	6.98114	-5.01102	5.39148e-06	0.000446917	3.8491
Bcl7a	2.34336	6.7634	5.00379	5.53449e-06	0.000456555	3.8262
Mrfap1	1.73082	7.47748	4.99602	5.69245e-06	0.000467328	3.79594
Lin7c	-2.53969	7.79646	-4.98555	5.91228e-06	0.000483053	3.75872
Adamts16	-3.56101	2.01038	-4.984	5.94561e-06	0.000483463	3.64499
Nxph1	-2.36208	7.361	-4.98186	5.99172e-06	0.000484903	3.74723
Rpl14	2.01687	7.13848	4.97576	6.12535e-06	0.000493379	3.7279
Zkscan17	-2.08892	3.90852	-4.96211	6.43497e-06	0.000515885	3.7371
Fam91a1	-2.81221	6.36319	-4.96067	6.46873e-06	0.000516169	3.67973
Slc36a1	-2.16301	5.84466	-4.95524	6.59677e-06	0.000522347	3.66745
Lama3	-4.34106	1.78276	-4.9548	6.60734e-06	0.000522347	3.4984
Sfxn3	-2.39319	7.31067	-4.95116	6.69466e-06	0.000526811	3.64233
Lrrc59	-2.4574	7.39849	-4.94823	6.76585e-06	0.000528896	3.63211
Chd8	-1.68079	6.72009	-4.94752	6.7831e-06	0.000528896	3.63318
Zfp862-ps	2.15381	4.84328	4.94611	6.81765e-06	0.000529173	3.66495
2810029C07Rik	3.45206	2.3316	4.93719	7.04063e-06	0.000544008	3.50697
Clock	-1.94686	5.73977	-4.92886	7.25543e-06	0.00055808	3.57947
Myd88	4.78762	1.42783	4.9272	7.29871e-06	0.000558891	3.11252
Renbp	10.5705	-1.2723	4.91976	7.49699e-06	0.000571511	0.251885
Tomm22	2.03645	6.39154	4.91055	7.74999e-06	0.000587034	3.50981
Klf9	-3.22553	5.21749	-4.90985	7.76936e-06	0.000587034	3.52614
Kctd10	2.09697	4.99017	4.89742	8.12471e-06	0.000604037	3.49606
Cyth2	2.02289	6.54573	4.90028	8.04172e-06	0.000604037	3.47376
Hadh	3.15799	3.22422	4.89704	8.1359e-06	0.000604037	3.50197
Mgat2	-2.19057	5.54829	-4.89908	8.07648e-06	0.000604037	3.48142
Pgap2	-1.65651	4.27065	-4.89498	8.19625e-06	0.000605884	3.50622
Alg11	-2.10557	5.58812	-4.89367	8.2349e-06	0.000606117	3.46262
Gpr158	-2.95268	4.5129	-4.89124	8.30726e-06	0.000608819	3.48411
Nsun2	1.36886	6.37197	4.88764	8.41548e-06	0.000614115	3.43177
Pitpnm3	-3.00121	5.18569	-4.88446	8.5121e-06	0.000618521	3.44195
Armc10	2.2497	5.09922	4.87426	8.82962e-06	0.000638876	3.41444
Tm6sf1	-4.11772	3.22547	-4.86946	8.98327e-06	0.000647251	3.42538
Pttg1ip	1.57683	4.95376	4.86054	9.27548e-06	0.000662712	3.37167
Nhsl2	-3.3808	4.03824	-4.86078	9.26728e-06	0.000662712	3.39535
Sprn	-3.19886	6.32046	-4.85277	9.53749e-06	0.000678593	3.31284
Pla2g12a	1.90034	4.48052	4.84782	9.70797e-06	0.000687856	3.34453
Tbc1d7	1.8121	4.34727	4.84611	9.76778e-06	0.000688072	3.34271
Tmem176b	-2.65495	4.02827	-4.84543	9.7916e-06	0.000688072	3.34469
Gad1	-2.61054	9.3859	-4.84206	9.9105e-06	0.000693572	3.26689
Fam131c	-3.43979	4.26376	-4.83412	1.01963e-05	0.000704909	3.30003
Ahsa1	1.23669	6.61846	4.83466	1.01765e-05	0.000704909	3.24986
Atf5	-2.8979	5.70684	-4.83516	1.01582e-05	0.000704909	3.26083
Nfic	-2.78935	4.3275	-4.83056	1.03269e-05	0.000711058	3.28603
Tet1	-3.09482	5.59848	-4.82688	1.04641e-05	0.000717607	3.2352
Larp7	2.39522	3.91507	4.81949	1.0744e-05	0.00073386	3.26394
Tspan2	-3.08636	5.24729	-4.81524	1.09087e-05	0.000742141	3.20474
Purg	-2.54127	5.13816	-4.81197	1.10369e-05	0.000747882	3.19721
Slc38a1	-2.92595	7.98464	-4.80873	1.11655e-05	0.000750635	3.15538
Psd2	-1.73156	6.58235	-4.80881	1.11623e-05	0.000750635	3.16187
Tug1	-2.62259	7.19218	-4.80292	1.13996e-05	0.000763373	3.1385
Zim1	-3.28436	4.32997	-4.79971	1.15309e-05	0.000769147	3.18342
Zfp282	-1.67727	5.72292	-4.79852	1.158e-05	0.000769418	3.13793
Tceanc2	1.91325	4.77166	4.78944	1.19614e-05	0.000789073	3.14
Tmem130	-2.74123	8.7259	-4.78928	1.19683e-05	0.000789073	3.08837
Lrrc8a	-3.31753	3.74139	-4.7846	1.21699e-05	0.000796222	3.14905
Krt1	-2.76215	3.05534	-4.78503	1.2151e-05	0.000796222	3.14285
Rnf152	-3.24047	5.60532	-4.77929	1.24026e-05	0.000802445	3.07487
Zbtb5	1.56283	5.27215	4.78022	1.23612e-05	0.000802445	3.09108
Slc7a14	-2.38227	6.65388	-4.77921	1.2406e-05	0.000802445	3.0614
Unc80	-2.80838	5.96744	-4.77165	1.27448e-05	0.000821249	3.04235
Brpf3	-2.90821	4.51771	-4.76885	1.28725e-05	0.000826356	3.07349
Dhfr	3.61686	2.04196	4.7653	1.30362e-05	0.000828769	2.90506
Bpgm	1.90916	5.95113	4.76621	1.29939e-05	0.000828769	3.02689
Nrn1	2.91113	5.72156	4.76488	1.30557e-05	0.000828769	3.02858
Cemip	-4.44893	5.80442	-4.76217	1.31823e-05	0.000833709	3.01268
Usp31	-2.29281	6.47027	-4.76094	1.32404e-05	0.000834289	3.00123
Ficd	-2.42038	3.21661	-4.75746	1.34053e-05	0.000841579	3.05824
Tbc1d22b	-1.80585	5.96457	-4.73922	1.43037e-05	0.00089469	2.93381
Ptbp3	3.65342	4.34687	4.73424	1.45591e-05	0.000906488	2.97406
Nfatc3	2.30268	3.76254	4.73348	1.45985e-05	0.000906488	2.98246
Copz1	1.38074	7.08595	4.7323	1.46598e-05	0.000906998	2.90176
Ssx2ip	2.18118	6.22077	4.73106	1.47243e-05	0.0009077	2.9054
Ndufaf7	1.6934	5.30288	4.72787	1.48922e-05	0.000911469	2.91471
Tubg1	1.68331	5.16612	4.7283	1.48697e-05	0.000911469	2.92077
Tmem134	2.09209	4.32027	4.72131	1.52429e-05	0.000929602	2.92909
Sqstm1	-1.75451	8.35792	-4.71915	1.53602e-05	0.00093342	2.8527
Lsm2	2.4001	2.99448	4.71605	1.55301e-05	0.0009404	2.90648
Pofut2	-2.24598	4.71666	-4.70525	1.61364e-05	0.000971465	2.85503
Pik3r4	2.26997	5.14702	4.70489	1.61569e-05	0.000971465	2.84433
Pcmt1	-1.63937	7.0042	-4.69924	1.64838e-05	0.00098764	2.79088
Rnf144a	2.30483	4.98265	4.69779	1.65687e-05	0.000989255	2.82831
Ano10	-3.51821	4.80279	-4.69639	1.66508e-05	0.000990693	2.82235
Uhrf1	-7.16017	-0.458489	-4.68687	1.72219e-05	0.00101758	1.45479
Astn1	-2.4439	8.36988	-4.68713	1.72058e-05	0.00101758	2.74531
Myo9a	-2.55911	7.4866	-4.68485	1.73456e-05	0.00101785	2.74023
Pcdha2	-2.59276	3.46628	-4.68513	1.7328e-05	0.00101785	2.82539
Gemin2	3.74152	2.77593	4.68322	1.7446e-05	0.00102023	2.77873
Mamld1	-3.57777	4.97494	-4.68144	1.75561e-05	0.00102316	2.76624
Tex261	1.67015	5.45086	4.67694	1.78377e-05	0.00103604	2.74005
Smarcd1	1.48801	7.06312	4.66964	1.83042e-05	0.00105953	2.69206
Slc35e2	-2.07114	5.6535	-4.66623	1.85255e-05	0.00106872	2.69605
Rhou	3.05463	5.88577	4.66247	1.87733e-05	0.00107937	2.68285
Prkaa2	-3.19432	6.68051	-4.65924	1.8989e-05	0.00108811	2.6592
Fbxo7	-2.04086	5.97938	-4.65794	1.90763e-05	0.00108946	2.66246
Dnal4	2.10013	5.06567	4.65201	1.94796e-05	0.0011051	2.67175
Nrm	4.56225	1.65342	4.65248	1.94477e-05	0.0011051	2.41925
Nnt	-2.30601	3.38107	-4.64701	1.98263e-05	0.00112104	2.70213
Braf	-3.3571	6.83678	-4.64493	1.99722e-05	0.00112556	2.61004
Marchf3	4.71263	1.63272	4.63828	2.04462e-05	0.00114848	2.3764
Psmc3	1.5281	7.2256	4.63055	2.1011e-05	0.00117634	2.56092
Prdx2	1.40863	8.57983	4.62488	2.14348e-05	0.00118907	2.53739
Hmbs	2.22005	4.11039	4.62617	2.13379e-05	0.00118907	2.6244
Rab31	2.53363	6.33628	4.62472	2.14473e-05	0.00118907	2.54876
St8sia5	-2.97269	3.78496	-4.62082	2.17435e-05	0.00120159	2.61013
Rph3a	-2.00774	7.3095	-4.61838	2.19311e-05	0.00120805	2.51938
9930021J03Rik	-2.43791	5.96536	-4.61545	2.2158e-05	0.00121662	2.52148
Colgalt1	1.82494	5.94225	4.61444	2.22369e-05	0.00121704	2.52017
Shisa9	-2.63096	6.70841	-4.61063	2.25374e-05	0.00122955	2.49685
Ptma	-1.97935	7.58869	-4.6055	2.29475e-05	0.00124401	2.47561
Kctd15	-2.15734	5.03909	-4.6053	2.29637e-05	0.00124401	2.51208
Gm14204	2.85957	4.16528	4.60459	2.3021e-05	0.00124401	2.55298
Rpia	2.28951	3.27335	4.59995	2.33997e-05	0.00126048	2.54841
Mapk11	2.07023	4.21638	4.59715	2.36309e-05	0.00126894	2.52525
Syn2	-2.47965	7.70148	-4.59505	2.38054e-05	0.00127134	2.44029
Edem1	-2.09817	4.52244	-4.59482	2.38246e-05	0.00127134	2.49937
Agpat1	-1.61442	7.04078	-4.58951	2.42737e-05	0.00129127	2.42494
Zfp704	-2.56455	7.13226	-4.57727	2.53384e-05	0.00134372	2.3838
Trim9	-2.29318	7.06171	-4.57585	2.54655e-05	0.00134628	2.37941
Atl1	1.27328	6.89491	4.57062	2.5936e-05	0.00136692	2.36399
Sst	-4.31957	8.62942	-4.56734	2.62363e-05	0.00137849	2.34616
Eif2b3	1.88008	4.21117	4.56423	2.65238e-05	0.00138933	2.41785
Clcn5	-2.49701	5.54909	-4.55569	2.73289e-05	0.00142277	2.33368
Zmat4	3.48388	5.0306	4.55626	2.7274e-05	0.00142277	2.36482
Pcdha3	-2.23269	4.04817	-4.54857	2.80185e-05	0.00145424	2.36714
Far2	-2.47496	5.20023	-4.54646	2.8226e-05	0.00146057	2.31213
Gas2l1	-2.63842	4.59157	-4.54332	2.85377e-05	0.00147224	2.32683
Jazf1	-1.88774	6.3292	-4.53818	2.90549e-05	0.0014944	2.2614
Wnt5a	-4.07639	3.78883	-4.53513	2.93662e-05	0.00150137	2.33283
Tbr1	-2.292	5.49903	-4.5352	2.93595e-05	0.00150137	2.26806
Endod1	-1.41643	6.24472	-4.5288	3.00231e-05	0.00153037	2.23075
Slc35f3	-2.71711	3.54149	-4.52634	3.02823e-05	0.00153899	2.31249
Rragd	2.12035	6.67809	4.52273	3.06661e-05	0.00155209	2.20801
Stox2	-1.80082	8.21938	-4.52221	3.07218e-05	0.00155209	2.19797
Sema6a	-3.43084	6.47574	-4.51975	3.0987e-05	0.00156087	2.19883
Prickle1	2.96607	5.38667	4.51352	3.16677e-05	0.00157655	2.20499
Kcnj6	-4.32672	3.32858	-4.51513	3.14905e-05	0.00157655	2.27892
Diras2	-3.14514	7.64855	-4.51409	3.16045e-05	0.00157655	2.17294
Morn4	1.41034	7.30962	4.5146	3.15482e-05	0.00157655	2.17685
Suox	2.38543	4.59396	4.50351	3.27914e-05	0.00162775	2.20488
Psmb2	1.54526	6.1027	4.50154	3.3018e-05	0.00162952	2.14458
Trim62	-1.82507	5.7113	-4.50161	3.30093e-05	0.00162952	2.15013
Cdk4	1.534	6.05379	4.49161	3.41799e-05	0.00166759	2.11311
Slc4a8	-2.1204	6.87887	-4.49323	3.39873e-05	0.00166759	2.10827
Cracd	-2.04579	7.97182	-4.49251	3.40724e-05	0.00166759	2.10097
Nudt1	3.54239	2.83924	4.49188	3.41476e-05	0.00166759	2.18525
Cct5	1.53698	8.28989	4.48599	3.48548e-05	0.00169139	2.07903
Lgi3	-3.50259	3.03574	-4.48589	3.48659e-05	0.00169139	2.18588
Ttc7b	-2.14562	6.53272	-4.4839	3.51088e-05	0.00169835	2.08081
Cplx1	-3.1195	8.89244	-4.48158	3.53935e-05	0.00170728	2.06344
Gad2	-2.79972	8.24007	-4.47565	3.61301e-05	0.00173303	2.04485
Myl12b	1.38808	7.65993	4.47582	3.61096e-05	0.00173303	2.04781
Lgalsl	-1.82127	7.28046	-4.47299	3.64654e-05	0.00174421	2.03974
Tunar	-1.96166	4.64137	-4.46797	3.71074e-05	0.00176996	2.08051
Mrpl45	2.24564	5.4392	4.45555	3.87422e-05	0.00184279	2.01233
Fam168a	-1.74589	8.25007	-4.4521	3.92081e-05	0.00185977	1.96791
Tril	-7.25595	0.871475	-4.45107	3.93486e-05	0.00186126	1.70487
Kif1b	-2.28285	9.77192	-4.44907	3.96228e-05	0.00186906	1.95713
Dtd2	2.6333	2.90062	4.44636	3.9997e-05	0.00188151	2.05139
Creg2	-2.42197	5.91573	-4.4446	4.02413e-05	0.0018878	1.95977
Dpf2	1.90321	5.27134	4.4416	4.06627e-05	0.00189759	1.9734
Eri1	2.12925	4.71194	4.44153	4.06721e-05	0.00189759	1.99814
Xiap	-2.08924	6.30047	-4.44014	4.0868e-05	0.00190153	1.93966
Shisa4	-1.63269	5.84692	-4.43893	4.10404e-05	0.00190436	1.94275
Sec11a	2.12391	5.41971	4.43655	4.13792e-05	0.00191488	1.95091
Cenpj	3.4604	2.58601	4.43388	4.17634e-05	0.00192744	1.98655
Gclm	-1.99084	5.18725	-4.43227	4.19974e-05	0.00192782	1.94008
Trim67	-1.89631	7.6811	-4.43237	4.19826e-05	0.00192782	1.90516
Kcnc4	-2.09007	5.03895	-4.42956	4.23925e-05	0.00194074	1.9369
Nop9	1.72402	4.6866	4.4282	4.2593e-05	0.00194156	1.95522
Mad2l2	2.95793	3.72062	4.4279	4.2638e-05	0.00194156	1.9996
Sgf29	2.55343	3.12274	4.42491	4.30812e-05	0.00195653	1.99254
Grem2	-2.89344	5.06903	-4.42235	4.3464e-05	0.00196347	1.91346
Scrt2	2.88441	4.54143	4.42237	4.34617e-05	0.00196347	1.94763
Mief1	-1.64106	5.62861	-4.41442	4.46726e-05	0.00201274	1.86892
Tacc1	-2.12003	6.19403	-4.40932	4.54667e-05	0.00204313	1.84061
Uprt	-2.72624	3.65167	-4.39793	4.72896e-05	0.00211947	1.89918
Ptpn4	-3.43085	6.41507	-4.39413	4.79143e-05	0.00214185	1.78834
Bcam	-4.43396	2.30023	-4.39185	4.82918e-05	0.00215308	1.8573
Caprin2	2.4693	3.65193	4.38723	4.90672e-05	0.00218196	1.87163
Lrrc55	-4.40404	5.09492	-4.38621	4.92412e-05	0.00218401	1.79237
Klf15	-2.79836	3.01926	-4.38012	5.02855e-05	0.00222455	1.85428
Man1b1	1.26661	6.32058	4.37907	5.04661e-05	0.00222677	1.74252
Rev3l	-2.11463	7.429	-4.37325	5.14881e-05	0.00226601	1.71398
Kcna2	-2.69904	6.37175	-4.37016	5.20385e-05	0.00228434	1.711
Agk	1.44897	5.55451	4.36938	5.21789e-05	0.00228463	1.7276
Klhl21	2.01666	3.93977	4.36419	5.3119e-05	0.00231984	1.78722
Slc25a17	-1.8301	5.31215	-4.36308	5.33218e-05	0.00232276	1.71208
Cntnap3	-2.4364	5.55305	-4.36159	5.35952e-05	0.00232873	1.70026
Unc5c	-3.62117	6.65859	-4.35989	5.39095e-05	0.00233644	1.6752
Cnnm4	-2.29991	4.32092	-4.35726	5.44006e-05	0.00233991	1.73874
Adamts17	-3.32835	4.39291	-4.35785	5.42895e-05	0.00233991	1.73487
Pcdha1	-3.84319	1.80557	-4.35818	5.42281e-05	0.00233991	1.6955
Atp11a	-1.93689	6.13393	-4.35633	5.45736e-05	0.00234145	1.6696
Flcn	-1.565	5.54919	-4.35559	5.47139e-05	0.00234159	1.68026
Crim1	-2.87948	5.86329	-4.35109	5.55647e-05	0.00237206	1.65686
P2rx3	-3.64172	2.56112	-4.34997	5.57804e-05	0.00237533	1.74807
Slc6a1	-2.64784	9.68525	-4.34728	5.62965e-05	0.00239134	1.62614
Arf2	1.4439	7.34441	4.34555	5.66321e-05	0.00239963	1.62555
Etl4	-3.76527	5.8379	-4.34459	5.68192e-05	0.0024016	1.637
Slc39a9	-1.97612	5.83432	-4.34307	5.71178e-05	0.00240826	1.63207
Ogfrl1	-2.71134	5.64508	-4.3367	5.83795e-05	0.00245539	1.61563
Wars2	-2.52377	2.62846	-4.33463	5.87955e-05	0.00246681	1.70342
Cep41	-2.14675	3.34768	-4.32575	6.06125e-05	0.00253681	1.68166
Vgll2	-12.7689	-1.50646	-4.32215	6.13654e-05	0.00256204	-0.244634
Taldo1	1.60769	6.30062	4.31537	6.2806e-05	0.00261121	1.53694
Tmem260	-2.00584	3.97447	-4.31517	6.2849e-05	0.00261121	1.6263
Lrp10	-2.12626	5.19721	-4.3144	6.30149e-05	0.00261175	1.55931
Gmpr	1.87948	4.51137	4.30954	6.40717e-05	0.00264273	1.58493
Dusp4	-4.62271	5.6175	-4.30994	6.39848e-05	0.00264273	1.52941
Ate1	-2.24719	6.63097	-4.30769	6.44785e-05	0.0026531	1.50793
Rnf141	-1.86942	6.74995	-4.30425	6.52406e-05	0.00267158	1.49595
Med12l	-3.20634	4.9293	-4.30466	6.5149e-05	0.00267158	1.5398
Esrrg	-4.82385	4.98036	-4.3021	6.57215e-05	0.00268483	1.52669
Slc7a5	-2.27375	7.42819	-4.29983	6.62349e-05	0.00269935	1.477
2810013P06Rik	2.97595	3.95574	4.29643	6.70094e-05	0.00272441	1.57535
Rfx5	-2.24654	3.34016	-4.29561	6.71969e-05	0.00272555	1.58744
Homer2	-2.09837	6.13129	-4.29233	6.79545e-05	0.00274974	1.46388
Arid1a	-1.97442	7.05131	-4.28924	6.86737e-05	0.00276574	1.44518
Mthfd1	1.78337	5.14928	4.28933	6.86526e-05	0.00276574	1.48742
Fer1l5	-2.47543	3.64737	-4.28773	6.90295e-05	0.00277352	1.55192
Pidd1	3.73563	2.54956	4.28693	6.92188e-05	0.0027746	1.53901
Fam167a	-2.93261	2.84106	-4.2805	7.07533e-05	0.00282286	1.54505
Tmem151b	-2.76807	7.64725	-4.28113	7.06025e-05	0.00282286	1.41599
Nrxn1	-2.40053	8.69709	-4.27821	7.13084e-05	0.00283742	1.40377
Slc7a11	-5.17289	2.55079	-4.27762	7.14506e-05	0.00283742	1.53136
Alcam	-2.56108	7.78233	-4.27547	7.19776e-05	0.00285172	1.3973
Trp53inp1	4.29653	5.11669	4.27345	7.24741e-05	0.00286474	1.44575
Chd1l	2.84532	2.14892	4.27127	7.30155e-05	0.00287948	1.45166
Tmem38a	-1.42893	6.40753	-4.26459	7.46958e-05	0.00293895	1.3714
Plgrkt	2.96088	4.48145	4.26135	7.55243e-05	0.002964	1.43641
Sap130	-2.14879	5.92537	-4.25821	7.63359e-05	0.002964	1.35842
Igfbp7	-5.28137	0.432634	-4.25816	7.63487e-05	0.002964	0.986763
Ipo8	1.66862	5.30545	4.25813	7.63573e-05	0.002964	1.38255
Kif18b	-15.3658	-3.2848	-4.25807	7.63737e-05	0.002964	-1.64448
Klf12	-3.68696	4.19366	-4.25813	7.63567e-05	0.002964	1.42893
Rnf6	1.38974	5.48787	4.25447	7.73139e-05	0.00299368	1.36141
Mrpl40	1.96399	4.76321	4.25228	7.78915e-05	0.00300423	1.38972
Alkbh8	-2.03253	5.26361	-4.2521	7.79383e-05	0.00300423	1.35953
Arpp19	-1.83063	6.96785	-4.24651	7.94354e-05	0.00305177	1.30907
Cbx4	-2.12896	4.89695	-4.24616	7.95291e-05	0.00305177	1.35483
Dcaf12	-1.46411	6.28319	-4.24438	8.0013e-05	0.0030566	1.30827
Dzip1l	-1.71334	4.47025	-4.24466	7.99366e-05	0.0030566	1.37327
Nudt10	3.22524	4.42252	4.24161	8.07684e-05	0.00307857	1.37923
Adgra1	-2.23708	5.03984	-4.23952	8.13445e-05	0.00309363	1.3272
Marco	-17.2898	-4.89321	-4.23821	8.17083e-05	0.00310056	-2.54982
Eif4e3	2.12086	3.00315	4.23351	8.30228e-05	0.00314345	1.40115
Ilf2	1.16411	6.95686	4.2311	8.3703e-05	0.00315522	1.26062
Drg2	1.49622	5.99476	4.23149	8.35923e-05	0.00315522	1.27381
Cacng5	-3.84569	4.46128	-4.22992	8.40392e-05	0.00316091	1.32413
Zfp536	-2.78093	5.65619	-4.22077	8.66876e-05	0.00324622	1.24601
Lrrc8c	-2.57402	4.72818	-4.22102	8.66135e-05	0.00324622	1.28398
Tmem143	-2.13585	4.40228	-4.21916	8.71614e-05	0.00325682	1.29619
Clcn6	-2.75247	6.90403	-4.21726	8.77269e-05	0.0032708	1.21663
Xkr4	-3.32166	6.93195	-4.21658	8.79274e-05	0.00327113	1.21377
Gm9776	3.52577	1.70486	4.21493	8.84202e-05	0.00328231	1.2005
Plek	-2.96917	2.29351	-4.21304	8.89879e-05	0.00329622	1.32093
Zfp941	-2.46703	4.87209	-4.21144	8.94727e-05	0.003307	1.24694
Wdpcp	2.39164	3.20288	4.20473	9.15274e-05	0.00336837	1.31356
Slc25a15	2.01048	3.14354	4.20519	9.13864e-05	0.00336837	1.31518
Pdzd8	-2.02804	6.21703	-4.20245	9.2237e-05	0.00338718	1.17552
Frg1	2.13981	4.24573	4.2007	9.27854e-05	0.00340001	1.25721
Rnf150	-2.63528	5.28136	-4.19685	9.39996e-05	0.00343713	1.18272
Cacna1b	-1.82027	7.56173	-4.19602	9.42651e-05	0.00343947	1.14488
Slc9a3r2	-1.94156	4.9827	-4.19089	9.59129e-05	0.0034847	1.17629
Utp14b	-2.03253	3.70722	-4.1909	9.59095e-05	0.0034847	1.24732
Fndc3b	-3.6376	5.357	-4.18745	9.70352e-05	0.0035083	1.14809
Rundc3b	1.67194	6.58588	4.18701	9.71787e-05	0.0035083	1.12388
Plekha7	-2.21723	3.54853	-4.18738	9.70575e-05	0.0035083	1.24384
Cplx3	-7.30166	0.210657	-4.1844	9.80393e-05	0.0035319	0.701429
Smarcd2	3.01456	3.19865	4.17977	9.95855e-05	0.00358005	1.23769
Dctn4	-1.46047	7.12325	-4.17754	0.000100339	0.00359954	1.08874
Zmpste24	-2.05728	4.11107	-4.17646	0.000100703	0.00360502	1.18011
Ptpdc1	1.51537	4.65138	4.17097	0.000102585	0.00365709	1.13903
Mrps16	1.95477	4.814	4.17151	0.0001024	0.00365709	1.13218
Cachd1	-3.84113	4.44772	-4.16862	0.000103403	0.00367856	1.1317
Slc23a2	-1.99066	6.64155	-4.16513	0.000104627	0.00371437	1.05292
Pus7l	3.53945	2.01948	4.16061	0.00010623	0.00376295	1.10449
Ilrun	1.11033	7.52891	4.15942	0.000106657	0.00376295	1.02972
Ube2n	-1.47379	7.40167	-4.15965	0.000106574	0.00376295	1.03059
Maml2	-2.5809	1.66336	-4.15202	0.00010935	0.00385002	1.06489
Elovl6	-2.58581	7.0196	-4.1481	0.0001108	0.00389305	0.996273
Coil	1.65874	5.01605	4.1444	0.000112186	0.00393365	1.03577
Qdpr	-1.84795	5.55955	-4.14043	0.000113695	0.00396214	0.999795
Pck2	-2.95042	3.68378	-4.1405	0.000113668	0.00396214	1.09169
Sorcs1	-2.22051	4.53579	-4.14156	0.000113264	0.00396214	1.0461
Fstl5	-2.66878	6.50679	-4.13575	0.000115496	0.00401672	0.961393
Ankfy1	-1.85886	6.70013	-4.13422	0.000116092	0.00402108	0.954876
Htr5a	-2.51538	3.99167	-4.13446	0.000115998	0.00402108	1.05527
Adarb2	-3.10815	5.69002	-4.13285	0.000116626	0.0040314	0.965853
Bri3bp	-2.35075	7.4222	-4.13217	0.000116892	0.00403166	0.943822
Lsamp	-2.23278	9.1361	-4.13163	0.000117106	0.00403166	0.937558
4833439L19Rik	1.24942	7.22364	4.12986	0.000117804	0.00404751	0.93827
Adh5	1.98584	6.73272	4.12861	0.000118298	0.00405633	0.938371
Btbd17	-4.73201	0.794778	-4.12406	0.00012012	0.00406137	0.77128
Mdp1	1.33724	5.48408	4.12478	0.00011983	0.00406137	0.951729
Slc4a3	-2.16907	7.34646	-4.12655	0.000119119	0.00406137	0.92635
Med1	-1.82894	5.98642	-4.12232	0.000120823	0.00406137	0.927206
Ash1l	-2.13245	6.68903	-4.12238	0.000120797	0.00406137	0.919753
Ociad1	-1.32219	7.94517	-4.12534	0.000119606	0.00406137	0.920068
Fbxl2	-1.22293	5.49748	-4.12708	0.000118909	0.00406137	0.954657
Asb13	-1.47082	4.66437	-4.12413	0.00012009	0.00406137	0.986049
Dagla	-2.28312	6.03426	-4.12568	0.000119467	0.00406137	0.936324
Rnf26	-2.72246	4.33752	-4.12268	0.000120676	0.00406137	0.998597
Gtf2e1	1.26	5.93991	4.11667	0.000123134	0.00411476	0.912312
Bgn	-6.29462	0.50196	-4.11679	0.000123086	0.00411476	0.664118
Nalf1	-2.01377	5.31048	-4.11679	0.000123086	0.00411476	0.929302
Frg2f1	2.34003	3.69102	4.11507	0.000123795	0.00412875	1.02418
Cnn3	1.72951	5.60566	4.11392	0.000124272	0.00413659	0.914469
Snap91	-1.56049	9.05619	-4.11105	0.000125473	0.00416844	0.87288
Rnf180	2.01866	3.74218	4.10627	0.0001275	0.00420383	0.993699
Nucks1	-2.16726	7.48853	-4.10645	0.000127421	0.00420383	0.862567
Anapc7	1.17239	5.72333	4.10621	0.000127523	0.00420383	0.885062
Gnao1	-1.32506	9.87114	-4.10628	0.000127497	0.00420383	0.858176
Ccdc149	-2.67326	4.9072	-4.10474	0.000128154	0.0042165	0.909022
Slc6a8	-2.60872	6.86433	-4.10388	0.000128524	0.00422052	0.858369
F830016B08Rik	-13.1732	-2.59739	-4.10232	0.000129198	0.00423453	-1.38665
Aldh1l2	-2.31072	6.0911	-4.09949	0.000130428	0.00425661	0.852928
Slc44a5	2.9854	4.99801	4.09905	0.00013062	0.00425661	0.901748
Insig1	-2.08739	7.14161	-4.09924	0.000130536	0.00425661	0.841809
Col8a1	-5.48926	0.716616	-4.09642	0.000131774	0.00428604	0.687466
Abhd13	-1.33665	5.67081	-4.09549	0.000132184	0.00429121	0.853109
Pygo1	-1.69355	6.69036	-4.09371	0.000132973	0.00430588	0.828059
Slc30a7	-1.65825	4.63629	-4.09333	0.00013314	0.00430588	0.890109
Ube3c	1.52208	7.59542	4.09214	0.000133674	0.00431495	0.81785
Gfer	1.84974	3.96021	4.09157	0.000133929	0.00431503	0.935131
Lrrc8b	-1.90339	7.45524	-4.09085	0.000134251	0.00431726	0.813845
Ddx25	1.20251	6.65061	4.08668	0.000136131	0.00436951	0.80715
Prkacb	-1.61243	8.95317	-4.0847	0.000137038	0.00438432	0.790274
Zfp873	3.17008	2.87113	4.08455	0.000137106	0.00438432	0.951127
Pou3f3	-1.91873	6.85941	-4.08075	0.000138856	0.00443194	0.785882
Fam186b	-4.59492	1.22544	-4.08019	0.000139115	0.00443194	0.789432
Zmym3	-1.06666	7.58078	-4.07857	0.000139869	0.00444733	0.774902
Scamp2	2.28843	3.89102	4.07748	0.000140379	0.00444733	0.898067
Ebf4	-2.64038	3.76959	-4.07754	0.00014035	0.00444733	0.894721
Nppc	-5.5822	3.50209	-4.07557	0.00014128	0.00446758	0.901242
Ngfr	-4.13633	2.79543	-4.07446	0.000141803	0.00447223	0.921346
C1qtnf1	4.42374	1.97803	4.07415	0.000141951	0.00447223	0.840592
Papola	-1.55785	7.02216	-4.07202	0.000142961	0.00448751	0.757592
Tpm4	-2.44883	5.44068	-4.07225	0.000142849	0.00448751	0.789505
Magee2	-1.88194	3.68693	-4.07094	0.000143476	0.0044954	0.880718
Map1b	-2.77511	11.3784	-4.06875	0.00014453	0.00452013	0.743202
Ncoa4	-1.25955	5.33271	-4.06817	0.00014481	0.00452062	0.779131
Plekhb2	-1.46376	8.25009	-4.06702	0.000145364	0.00452962	0.736263
Rgs7bp	-2.69806	7.36933	-4.0654	0.000146152	0.00454588	0.734762
Scrt1	-4.25668	6.04022	-4.06317	0.00014724	0.0045714	0.745242
Epas1	-6.01546	0.922126	-4.05972	0.000148942	0.00461586	0.657554
Isca1	-1.60699	6.31264	-4.05719	0.000150203	0.00463811	0.718067
Gjd2	-1.71994	5.30408	-4.05765	0.000149972	0.00463811	0.745018
Angel1	1.8821	4.07064	4.05564	0.000150981	0.0046537	0.8191
Cdh11	-1.82828	5.29192	-4.05406	0.000151776	0.00466977	0.7345
Fra10ac1	2.04494	4.0332	4.05346	0.000152079	0.00467068	0.81432
Car10	-2.68966	4.86205	-4.04972	0.000153983	0.00471711	0.740595
Megf6	-3.63176	2.9342	-4.04941	0.000154143	0.00471711	0.845771
Adcy9	-2.75604	4.37163	-4.04791	0.000154916	0.00472382	0.764099
Pigc	1.68706	3.81743	4.04833	0.000154701	0.00472382	0.811168
Gga2	1.58555	5.69531	4.047	0.000155384	0.00472966	0.702446
Arhgef40	-2.04956	3.99876	-4.04496	0.000156444	0.00475346	0.780909
Sox6	-2.63249	4.87755	-4.04403	0.000156929	0.00475972	0.72461
Wdr7	-1.88735	7.70014	-4.03633	0.000160996	0.00487442	0.642558
Mettl21a	2.74822	3.27914	4.03311	0.000162727	0.00489213	0.793509
Tmod1	-2.6836	2.7732	-4.03414	0.000162171	0.00489213	0.802032
Kctd1	-1.49249	4.44177	-4.0339	0.000162298	0.00489213	0.718999
Erc2	-1.88876	7.68007	-4.03327	0.000162639	0.00489213	0.63313
Col2a1	-4.97557	0.489774	-4.03137	0.000163666	0.00491171	0.429539
Colq	15.3176	-2.88671	4.02977	0.00016454	0.00492065	-2.45348
LOC102639719	15.3176	-2.88671	4.02977	0.00016454	0.00492065	-2.45348
Lrrc4	-1.75914	6.29264	-4.0276	0.00016573	0.00494291	0.625878
Plekhn1	-2.55162	2.17658	-4.02736	0.000165864	0.00494291	0.767471
Fancc	2.29492	2.98905	4.02498	0.000167179	0.00496612	0.774901
Ostf1	2.5308	2.69744	4.02489	0.000167224	0.00496612	0.7726
Hdac6	-1.80735	6.51916	-4.02319	0.000168173	0.00497697	0.60967
Meak7	1.43575	4.66364	4.0233	0.000168112	0.00497697	0.679866
Syn3	-2.87979	5.19842	-4.01874	0.000170674	0.00504226	0.630202
Lynx1	-3.43914	5.10643	-4.0181	0.000171037	0.00504425	0.630432
Raph1	-2.24136	6.71235	-4.01643	0.000171985	0.00506268	0.58708
Polr1has	3.64441	1.24038	4.01596	0.000172254	0.00506268	0.534175
Sorcs3	-2.4424	5.49136	-4.01245	0.000174267	0.00511302	0.597109
Vegfb	-2.06796	5.28155	-4.01045	0.000175423	0.00513812	0.599886
Tollip	-1.94182	6.81567	-4.00915	0.000176184	0.00514746	0.564135
Rwdd2b	1.85295	3.75363	4.00841	0.000176614	0.00514746	0.695109
Kmt5a	1.89664	5.57572	4.00835	0.000176646	0.00514746	0.590225
Atxn3	1.98544	5.07854	4.00498	0.000178632	0.00519645	0.601197
Nf1	-2.31542	7.21077	-4.00437	0.000178989	0.00519798	0.545895
Rab3c	-4.8292	9.65465	-4.00227	0.000180239	0.00520824	0.534067
Lars2	5.6744	8.04768	4.00173	0.000180562	0.00520824	0.535159
Zfp961	3.04732	3.3751	4.00175	0.000180548	0.00520824	0.696691
Ddx17	-1.16668	8.5939	-4.00291	0.000179856	0.00520824	0.536096
Stx17	-1.76262	5.25219	-3.99785	0.000182895	0.00526665	0.562612
Ptdss1	-2.11069	6.35965	-3.99611	0.000183951	0.00527038	0.527916
Arid1b	-2.02717	6.93529	-3.99635	0.000183804	0.00527038	0.522955
Wdfy1	-1.90967	4.05793	-3.99631	0.000183828	0.00527038	0.628203
Chic1	-2.53116	3.75534	-3.99399	0.000185245	0.00529858	0.640205
Kctd3	-1.48842	7.16597	-3.99104	0.000187056	0.00534143	0.505145
Coasy	1.47341	5.45981	3.9865	0.000189887	0.00540417	0.523774
Igsf1	-4.18143	2.31625	-3.98674	0.000189736	0.00540417	0.658378
Parg	1.50806	5.6156	3.98316	0.000191988	0.00545489	0.507651
Cpeb3	-2.46049	5.51596	-3.97891	0.000194705	0.00552289	0.492968
Clcn3	-1.88816	7.90549	-3.97801	0.000195279	0.00552998	0.46123
Mctp1	-2.95526	5.8502	-3.9768	0.000196063	0.005543	0.479004
Gpr26	-2.62579	8.14755	-3.97295	0.000198566	0.00560449	0.444606
Mtss2	-2.04085	8.19975	-3.97178	0.000199334	0.00561689	0.440851
Cd24a	3.68714	8.13272	3.96972	0.000200691	0.0056458	0.435663
Med9	-1.65926	4.95887	-3.96918	0.000201048	0.00564654	0.491773
Cilk1	-1.55645	5.51736	-3.96738	0.000202249	0.00566662	0.458714
Kcnc2	-2.34303	6.02398	-3.96711	0.000202427	0.00566662	0.444764
Aen	1.61301	6.26557	3.96562	0.000203424	0.00568522	0.43674
Brd4	-2.44013	6.6648	-3.96281	0.000205315	0.00570073	0.421704
Naa40	1.4189	5.58042	3.96379	0.000204654	0.00570073	0.449209
Ccdc90b	2.69818	3.76457	3.96288	0.000205264	0.00570073	0.55912
Tspyl4	-1.84717	8.8644	-3.96405	0.000204475	0.00570073	0.415743
Jpt1	1.3353	8.18705	3.95957	0.000207515	0.00575248	0.403736
Pnoc	-5.44805	5.13112	-3.95875	0.000208073	0.00575861	0.450836
Kit	-4.01903	6.59203	-3.95792	0.000208644	0.00576507	0.407327
Agpat4	-1.34368	6.12456	-3.95562	0.00021023	0.00579948	0.407015
Sntb1	-5.85626	0.266413	-3.9495	0.000214508	0.00590796	0.144739
Prkag2	1.57152	6.78667	3.94833	0.00021533	0.00591155	0.377413
Asap2	-1.66204	5.09503	-3.94863	0.000215121	0.00591155	0.418919
Med18	3.27599	1.75027	3.94414	0.000218319	0.00598399	0.460893
Efr3a	-1.70101	5.87805	-3.94361	0.0002187	0.00598482	0.374386
Prdx6	1.56982	5.73072	3.93995	0.000221342	0.00603774	0.371044
Tmem196	-3.1202	1.96308	-3.94014	0.000221207	0.00603774	0.504925
Aptx	1.74902	5.36403	3.93782	0.000222899	0.00605223	0.379491
Rell2	-2.51549	5.34875	-3.93781	0.000222906	0.00605223	0.373049
Styx	3.9039	1.62064	3.93777	0.000222936	0.00605223	0.408799
Phtf1	1.56517	5.03246	3.93697	0.000223519	0.00605844	0.394253
Enpp5	-1.34919	7.88669	-3.93395	0.000225744	0.00610905	0.325785
Cnnm3	-1.90154	4.44391	-3.93285	0.00022656	0.00611176	0.409637
Mast2	-2.60335	7.15168	-3.93316	0.000226336	0.00611176	0.327147
Frem3	-5.15839	1.89927	-3.9292	0.000229293	0.00617573	0.469401
Dpp7	-2.54244	3.4034	-3.92845	0.000229853	0.00618106	0.465146
Wiz	-2.64948	6.38924	-3.92363	0.000233516	0.00625003	0.307988
Map3k13	-2.50025	5.08862	-3.92372	0.000233451	0.00625003	0.343629
Pbx2	1.54476	5.09279	3.9241	0.000233154	0.00625003	0.352238
Exosc9	1.59606	5.45705	3.92241	0.000234454	0.00626531	0.327867
Kcnab2	-1.81209	6.56165	-3.91884	0.000237211	0.00632909	0.288533
Exoc8	-1.54833	5.45314	-3.91706	0.000238601	0.00635623	0.307459
Apbb2	-1.75248	5.60497	-3.91609	0.000239358	0.00635659	0.299075
Tcim	-4.00238	3.37611	-3.91654	0.000239003	0.00635659	0.428932
Samd4b	-3.61449	6.05267	-3.91266	0.000242056	0.00641825	0.27771
Nek7	-3.20957	4.565	-3.91127	0.000243163	0.00643759	0.334859
Pcnx	-2.12712	7.21915	-3.9092	0.000244819	0.00647142	0.253268
Plp1	3.71364	2.04815	3.90808	0.000245718	0.00648512	0.396783
D030028A08Rik	-1.9751	3.65288	-3.90571	0.000247626	0.0065254	0.383382
Gatm	2.66542	5.55702	3.90337	0.00024953	0.00655535	0.26846
Wdr62	-3.74822	1.38124	-3.90366	0.000249296	0.00655535	0.335269
Fzd4	-3.21056	2.90762	-3.90182	0.000250794	0.00657843	0.409999
Hyal3	5.52009	0.0134191	3.89714	0.000254664	0.00664026	-0.336645
Snx25	-1.64561	6.25634	-3.89736	0.000254479	0.00664026	0.226424
Cdc123	1.2912	5.51457	3.89599	0.000255622	0.00664026	0.244713
Tmc7	2.52757	3.75165	3.89662	0.000255096	0.00664026	0.36264
Ankrd34b	-2.73503	3.87191	-3.89569	0.000255873	0.00664026	0.336395
Chmp3	1.29078	6.44571	3.89736	0.000254477	0.00664026	0.22515
Tmem151a	-1.8549	6.37789	-3.89619	0.000255452	0.00664026	0.221623
Ap1s2	-3.20946	6.13615	-3.89467	0.000256724	0.00664433	0.222389
Zhx2	-2.66008	4.06357	-3.89457	0.000256808	0.00664433	0.318425
Pdxk	-1.98249	7.33996	-3.89015	0.000260544	0.00673079	0.194517
Spata2l	-2.83507	4.43549	-3.8894	0.000261179	0.006737	0.276369
Cds2	-1.32008	9.05353	-3.88878	0.000261706	0.00674041	0.185089
Pitpnm1	-1.93701	7.27012	-3.88791	0.000262454	0.00674949	0.1881
Zmat2	1.76283	7.05579	3.88244	0.000267174	0.00678677	0.173985
Helz	-2.25068	5.47673	-3.88351	0.000266244	0.00678677	0.203477
Smad5	-1.66956	5.13308	-3.88324	0.000266484	0.00678677	0.21902
Tppp	-3.3423	6.97996	-3.88483	0.000265103	0.00678677	0.180914
Fam118a	1.95921	4.56642	3.88255	0.000267082	0.00678677	0.260026
Cdc42bpa	-1.98323	7.89677	-3.88445	0.000265429	0.00678677	0.174512
Ap1g2	4.15894	2.40101	3.88399	0.000265827	0.00678677	0.35335
AI854703	-1.42223	4.99252	-3.88209	0.00026748	0.00678677	0.222992
Slc31a2	2.77502	2.45806	3.88474	0.000265184	0.00678677	0.361488
Arnt2	-1.73037	8.80803	-3.88042	0.000268943	0.00680367	0.159827
Gtf3c5	1.44661	4.63776	3.88065	0.000268737	0.00680367	0.247949
Stard3nl	1.31023	6.17171	3.87786	0.000271192	0.00684532	0.170052
Sh3bgrl2	-1.84486	4.20077	-3.87764	0.000271391	0.00684532	0.26183
Rgs12	-1.95855	5.86446	-3.87519	0.000273569	0.00689007	0.167499
4933431E20Rik	-2.32842	5.77874	-3.87301	0.000275512	0.00692878	0.162371
Zfp148	-1.5451	6.53729	-3.86528	0.000282536	0.00709498	0.125509
Ascc1	1.40734	4.95984	3.86414	0.000283589	0.00711095	0.177554
Chmp2a	1.48037	6.04511	3.86337	0.000284293	0.00711359	0.129088
Dcbld2	-2.28718	5.89378	-3.86312	0.000284527	0.00711359	0.128758
Shtn1	1.35539	7.80514	3.8623	0.000285286	0.00712215	0.108162
Syngr3	-1.23267	8.29203	-3.86147	0.000286061	0.00713107	0.103389
Cit	-2.07273	4.66455	-3.8582	0.00028912	0.00718633	0.172163
Psma1	2.15588	7.11986	3.85828	0.000289043	0.00718633	0.100287
Tram1	-1.8941	5.29427	-3.85716	0.0002901	0.00719155	0.131157
Taok3	-1.92515	5.93442	-3.85708	0.000290172	0.00719155	0.111175
Gm4691	-8.86824	-0.822261	-3.85048	0.000296464	0.00733684	-0.624366
Macroh2a1	1.13439	6.01695	3.84964	0.000297267	0.00733961	0.0877661
Slx4	-1.55601	5.66616	-3.84947	0.000297435	0.00733961	0.0947162
Nid1	-3.9187	1.36768	-3.84692	0.000299903	0.00737917	0.180896
Mis18a	2.926	2.92839	3.84719	0.00029964	0.00737917	0.2561
Ppp1r1c	-7.67777	1.60868	-3.84548	0.00030131	0.00740312	0.204942
Trim21	11.5202	-1.34986	3.84278	0.000303968	0.00745769	-1.58618
Cisd1	1.49865	6.51238	3.83949	0.000307225	0.0075268	0.0487648
Sh3kbp1	-1.88696	5.88885	-3.83815	0.000308561	0.0075487	0.0546175
Fech	-1.44463	5.01347	-3.8374	0.000309318	0.00755639	0.0922132
Sec24a	-1.78359	4.50779	-3.83685	0.000309868	0.00755902	0.117287
Marcksl1	-1.30655	9.55836	-3.83622	0.000310502	0.00756366	0.0257106
Gmcl1	1.47989	5.27773	3.83344	0.000313308	0.00762116	0.0673972
Papln	-6.45029	2.36302	-3.83103	0.000315763	0.00766995	0.212478
Adra1b	-2.85666	3.37315	-3.82306	0.000324019	0.00785929	0.154668
Cnot6l	-2.08454	5.71924	-3.82202	0.000325115	0.0078747	0.0107144
Agap1	-1.50802	8.31736	-3.82066	0.000326544	0.00789812	-0.0200916
St3gal3	-1.40858	5.36496	-3.81773	0.00032965	0.00796195	0.0114615
Vsig10l	-3.48118	1.57216	-3.81727	0.000330151	0.00796278	0.127072
Prrg3	-2.26778	5.44466	-3.81544	0.000332102	0.00799283	-0.000389585
Rnf38	-2.17539	6.0335	-3.81523	0.000332332	0.00799283	-0.0175829
Zmynd11	-1.06378	7.60523	-3.81446	0.000333157	0.0080014	-0.0358404
Ssbp1	2.42433	4.32892	3.8087	0.000339422	0.00813253	0.0575282
Cgnl1	-5.90413	-0.530208	-3.80856	0.00033957	0.00813253	-0.578961
Tmem266	-1.65334	4.52965	-3.80761	0.000340611	0.00814604	0.0278849
Pde8b	-2.27719	4.9077	-3.80536	0.000343101	0.00817626	-0.00461217
Gabrg3	-2.5173	5.57105	-3.80538	0.000343079	0.00817626	-0.0355597
Gm15638	-13.952	-3.4027	-3.80517	0.000343311	0.00817626	-2.27315
Trim68	2.89948	1.82356	3.80445	0.000344104	0.00818373	0.0887991
Ctnnbl1	1.35477	4.98977	3.80196	0.00034688	0.0081999	-0.0113191
Pde4a	-1.8621	5.93422	-3.80175	0.00034712	0.0081999	-0.057006
Apeh	-1.50786	5.14039	-3.80237	0.000346429	0.0081999	-0.0252028
Parp2	1.5817	4.30768	3.80341	0.000345265	0.0081999	0.040635
Irs1	-3.18902	4.87605	-3.80169	0.000347185	0.0081999	-0.014429
Nopchap1	-2.22132	5.86801	-3.79993	0.000349168	0.00822646	-0.0613642
Dusp7	-1.5231	5.17832	-3.79983	0.000349273	0.00822646	-0.0346228
Esm1	-8.70219	-0.84765	-3.79835	0.000350944	0.00825444	-0.853626
Commd1	2.03887	4.26098	3.79687	0.000352631	0.00828271	0.0264352
Gm17396	-3.5953	1.5579	-3.79642	0.000353145	0.00828337	0.0655663
Spata5	1.54553	4.16659	3.79591	0.000353724	0.00828558	0.0290126
Ncbp2	1.58873	5.68162	3.79345	0.000356541	0.00834012	-0.0705155
Rhebl1	2.00582	3.82607	3.79211	0.000358077	0.00835522	0.0458609
Cct7	1.03232	8.36707	3.79204	0.000358165	0.00835522	-0.106107
Lmbrd1	-1.87858	6.66067	-3.79158	0.000358694	0.00835615	-0.0980322
Adgra2	-2.52918	2.08175	-3.78471	0.000366723	0.00853156	0.0749806
Ddx10	1.67758	5.21456	3.78136	0.000370694	0.0086122	-0.0850705
Atg4b	1.11405	6.51897	3.77982	0.000372537	0.00864327	-0.130625
Mtf2	2.2727	4.84186	3.77775	0.000375026	0.00867113	-0.0707481
Ddhd1	-1.4592	5.43785	-3.77744	0.000375397	0.00867113	-0.112568
Ppp2r2d	-1.38384	6.21776	-3.777	0.000375931	0.00867113	-0.135864
Snip1	1.43388	4.02472	3.77738	0.000375479	0.00867113	-0.0148575
Lrrtm2	-2.08929	5.94527	-3.77672	0.000376277	0.00867113	-0.131327
Fam20c	-1.42784	6.05385	-3.775	0.000378356	0.00869556	-0.139128
Cort	-5.87379	4.37729	-3.77529	0.000378007	0.00869556	-0.0629927
Pla2r1	-14.3329	-3.96104	-3.77355	0.000380131	0.00872463	-2.59214
Ret	-2.98821	3.82423	-3.77262	0.000381261	0.00872709	-0.0240427
Creg1	-1.47272	4.74993	-3.77299	0.000380808	0.00872709	-0.0900101
Zbtb41	-1.94468	5.53951	-3.77164	0.000382472	0.00874309	-0.135066
Postn	-3.57548	3.56714	-3.76908	0.000385633	0.00879181	-0.017747
Vwc2	-2.69403	2.98413	-3.76909	0.000385619	0.00879181	0.0215488
Prxl2a	-1.31506	6.48621	-3.76539	0.000390228	0.00887289	-0.174593
Rnf41	-1.16739	6.88923	-3.76458	0.000391247	0.00887289	-0.18081
Mllt3	-1.79778	5.28324	-3.76456	0.000391267	0.00887289	-0.145187
Gabrq	-3.40706	2.11129	-3.76495	0.000390778	0.00887289	0.0213431
Fgd1	-2.14705	4.9267	-3.76249	0.000393875	0.00891866	-0.126875
Pip4k2c	1.44418	5.31272	3.76213	0.000394331	0.00891866	-0.147713
Dpy19l3	-1.68804	5.64748	-3.76065	0.000396212	0.00893755	-0.171421
Usp27x	-1.29633	4.34869	-3.76091	0.000395875	0.00893755	-0.0968466
Ramp3	-3.82543	4.21855	-3.75957	0.000397582	0.00895661	-0.0950903
Gnai3	1.33743	6.86529	3.75841	0.000399075	0.0089598	-0.197979
Ubl3	-1.5417	6.24161	-3.75875	0.000398629	0.0089598	-0.190666
Pcolce2	-4.87244	0.0834762	-3.75803	0.000399557	0.0089598	-0.405762
Atl3	2.3368	5.07351	3.75782	0.000399823	0.0089598	-0.142754
Rasa2	-1.56721	5.47847	-3.75707	0.000400786	0.00896962	-0.175321
Kif3c	-1.37479	8.57951	-3.75663	0.000401353	0.00897055	-0.212787
Pam	-2.9485	7.66366	-3.75572	0.000402532	0.00898514	-0.21259
Tle2	-2.34366	4.47214	-3.75335	0.000405599	0.00900652	-0.130621
Sp8	-4.01145	2.84223	-3.75414	0.00040457	0.00900652	-0.0156894
Tnip2	-2.57656	3.03283	-3.75375	0.000405081	0.00900652	-0.0255857
Prdm11	-1.68881	4.8068	-3.75349	0.000405419	0.00900652	-0.150995
Inpp5b	-1.91352	4.5967	-3.75226	0.000407024	0.00902641	-0.141305
Map7d1	-1.85059	7.39344	-3.75146	0.000408063	0.00903772	-0.223618
Map1a	-1.98869	9.4518	-3.74946	0.000410693	0.00908419	-0.23471
Parp1	1.48775	6.82004	3.74831	0.0004122	0.00910572	-0.227782
Alk	-3.29153	2.9771	-3.74787	0.000412786	0.0091069	-0.0387607
Pld5	-3.81862	1.70836	-3.74548	0.000415961	0.0091651	-0.0560757
Tvp23a	-2.32529	5.09173	-3.74084	0.00042218	0.00929013	-0.205711
Zfp846	-1.45116	4.97214	-3.73973	0.000423694	0.00931145	-0.202109
Mmab	-1.3616	5.79133	-3.73861	0.000425205	0.00933265	-0.239844
Dbt	-2.38947	4.15383	-3.73713	0.00042723	0.00936505	-0.148911
Dnajc9	1.67184	5.23315	3.73378	0.000431829	0.00945374	-0.226281
Sstr2	-4.03959	4.12692	-3.73157	0.00043489	0.00950855	-0.17253
Drg1	1.33937	6.80105	3.73063	0.000436198	0.00951474	-0.280207
Wbp4	1.09085	6.14948	3.72977	0.000437402	0.00951474	-0.274162
Iffo2	1.40801	4.8652	3.73008	0.000436971	0.00951474	-0.216698
Chd6	-1.51866	6.51498	-3.73051	0.000436365	0.00951474	-0.278459
Cd320	2.20456	3.56206	3.72655	0.000441925	0.00960091	-0.124164
Dcps	1.6327	3.89686	3.72473	0.000444503	0.00964102	-0.156644
Mcat	1.64479	4.90534	3.72445	0.000444901	0.00964102	-0.234875
Pus7	1.63154	4.51293	3.72045	0.000450617	0.00975252	-0.219219
Plekha8	1.56801	4.45239	3.71917	0.000452466	0.00978014	-0.2182
Elmo1	-2.20462	7.57673	-3.71622	0.000456748	0.00986021	-0.329306
Sarm1	-1.37217	6.26154	-3.7151	0.000458378	0.00988292	-0.321072
Psmd4	1.29328	6.99093	3.71345	0.000460793	0.00992244	-0.3329
Tmem161a	1.41121	5.20403	3.71137	0.000463858	0.00997587	-0.29294
Ippk	1.82944	3.95357	3.71029	0.000465465	0.00999783	-0.202996
Pgrmc1	-1.68738	8.88945	-3.70296	0.000476459	0.0101614	-0.372677
Slc12a5	-1.56298	7.92189	-3.7046	0.000473989	0.0101614	-0.365404
Trim26	-1.79018	4.88384	-3.70298	0.000476432	0.0101614	-0.305146
Copg2	1.27761	6.30004	3.7034	0.000475792	0.0101614	-0.354724
Npr2	-2.05161	4.0868	-3.70375	0.000475262	0.0101614	-0.245797
AW551984	-2.87522	5.75828	-3.70284	0.00047665	0.0101614	-0.345159
Baiap2l2	-4.19152	4.27171	-3.70173	0.00047833	0.0101759	-0.270731
Cct6a	1.23135	8.20137	3.70161	0.000478524	0.0101759	-0.374933
Mnt	-2.05079	5.77653	-3.70101	0.000479433	0.0101826	-0.352123
Arpc4	1.24388	6.44132	3.70041	0.000480347	0.0101893	-0.365717
Csad	1.86646	3.22479	3.69498	0.000488716	0.0103471	-0.193659
Anapc15	1.69483	3.67771	3.6948	0.000488996	0.0103471	-0.225832
Ankrd40	1.34025	5.78357	3.69422	0.000489904	0.0103535	-0.369555
Nat10	1.36429	5.09893	3.69335	0.000491266	0.0103694	-0.339761
Rgs14	3.38937	2.85426	3.69153	0.000494114	0.0104038	-0.183754
H2-Bl	-6.31469	-0.214022	-3.6916	0.000494008	0.0104038	-0.680042
Alkbh7	-2.28366	3.5588	-3.69075	0.000495334	0.0104167	-0.241262
Zfp804b	-4.34716	2.07259	-3.68932	0.000497593	0.0104513	-0.187683
Alkal2	-6.20858	2.08943	-3.68808	0.000499558	0.0104762	-0.190974
E130307A14Rik	-1.16974	4.84459	-3.6878	0.000500006	0.0104762	-0.345738
Ggnbp2	1.39012	6.57413	3.68509	0.000504333	0.010541	-0.412624
Btf3	1.3613	6.58754	3.68525	0.000504073	0.010541	-0.412269
Zfp958	2.95516	4.32216	3.68433	0.000505548	0.0105535	-0.305234
Clvs1	-1.74765	4.33108	-3.68227	0.000508866	0.0106098	-0.325988
Sulf2	-1.61274	6.66042	-3.68066	0.000511474	0.0106511	-0.427539
Slc22a21	-2.87764	2.01889	-3.6785	0.000514987	0.0107112	-0.219983
Zswim8	-1.82976	7.15635	-3.6768	0.000517781	0.0107349	-0.44317
Ube3a	-2.23526	7.36593	-3.67704	0.000517391	0.0107349	-0.444074
Srcap	-3.50203	2.23093	-3.67666	0.000518012	0.0107349	-0.220774
Skp1	1.77711	8.83721	3.67586	0.000519326	0.0107491	-0.452569
Wnk3	-1.98451	5.81052	-3.67543	0.000520028	0.0107506	-0.424707
Psen1	-1.57175	6.03441	-3.67435	0.000521819	0.0107746	-0.436609
Fbxl16	-1.71711	7.81182	-3.6731	0.000523887	0.0108002	-0.457861
Ttbk2	-1.76529	6.73863	-3.67284	0.000524324	0.0108002	-0.451548
Mapk9	-1.32927	7.68283	-3.67158	0.00052643	0.0108305	-0.461729
2810025M15Rik	1.76002	4.36389	3.67048	0.000528262	0.0108551	-0.352518
Samd12	-2.26901	4.34635	-3.66693	0.000534237	0.0109647	-0.371964
Ift52	-2.27382	4.44234	-3.66621	0.000535461	0.010967	-0.377621
Bscl2	-1.84606	6.33063	-3.66611	0.000535634	0.010967	-0.466846
Pfkfb4	2.34137	4.52434	3.66573	0.000536276	0.010967	-0.376145
Cflar	-2.8374	3.54214	-3.66451	0.000538361	0.0109965	-0.316636
Armcx6	-2.41345	4.5606	-3.66166	0.000543239	0.0110828	-0.406317
Dpysl2	-1.626	8.80194	-3.66079	0.000544737	0.0110999	-0.497003
Daam1	-1.70994	7.46951	-3.66027	0.00054563	0.0110999	-0.493795
Coq10a	1.20804	5.47318	3.66004	0.000546026	0.0110999	-0.457566
Col18a1	-3.38702	1.72743	-3.65869	0.000548365	0.0111048	-0.287481
Rufy2	-1.17957	6.34931	-3.65777	0.000549967	0.0111048	-0.49107
Smu1	1.36684	6.30438	3.65875	0.000548267	0.0111048	-0.486207
Kif17	-2.38435	3.96393	-3.65765	0.000550168	0.0111048	-0.370016
Pknox2	-1.6417	6.099	-3.65828	0.000549087	0.0111048	-0.485117
Tox3	-1.9006	3.44304	-3.65874	0.000548288	0.0111048	-0.323022
Fgf12	-1.60056	7.1843	-3.65531	0.000554266	0.0111743	-0.506214
Gabrb1	-2.52268	7.43063	-3.65409	0.000556401	0.0112041	-0.511935
Pign	-2.52912	4.293	-3.65126	0.000561411	0.0112784	-0.414571
Htra2	-1.88	4.68659	-3.65155	0.000560889	0.0112784	-0.443401
Adamtsl1	-2.91867	2.90522	-3.64758	0.000567977	0.0113969	-0.319494
Ankrd17	-1.39814	7.90241	-3.64451	0.000573504	0.0114943	-0.542135
Ace	-2.9917	5.1178	-3.64287	0.0005765	0.011523	-0.49593
Sos1	-1.96306	6.56544	-3.64261	0.000576957	0.011523	-0.53837
Bbs7	1.57	4.70418	3.6427	0.000576809	0.011523	-0.459679
Cmas	1.27764	6.9622	3.64212	0.000577865	0.0115276	-0.542646
Rhbdd2	-1.09978	5.62151	-3.64102	0.000579867	0.0115434	-0.521836
Npy5r	-5.71314	-0.425906	-3.64094	0.000580011	0.0115434	-0.883326
Cog4	1.13062	6.0985	3.6405	0.000580822	0.0115461	-0.535674
Mppe1	2.71171	1.61076	3.63893	0.000583703	0.0115899	-0.37299
Slc6a9	-2.51723	5.00702	-3.63576	0.000589578	0.011693	-0.510937
Kics2	-2.04214	3.03398	-3.63519	0.000590639	0.0117004	-0.36112
Xpnpep1	1.23418	6.38084	3.63462	0.000591704	0.0117079	-0.558129
Krtcap3	-3.2745	0.696642	-3.63388	0.000593085	0.0117081	-0.512873
Tcerg1l	-1.95622	4.03792	-3.63415	0.000592583	0.0117081	-0.44347
Mlst8	1.29756	4.97583	3.63224	0.000596148	0.0117435	-0.509765
Irf2bpl	-2.12201	6.30368	-3.63219	0.000596254	0.0117435	-0.565818
Slc24a2	-3.00138	5.98706	-3.63132	0.000597888	0.0117621	-0.562069
Asphd1	-2.37846	4.77918	-3.63013	0.000600133	0.0117927	-0.51256
Thy1	-1.49598	7.65867	-3.62973	0.000600887	0.011794	-0.584322
Clec2l	-1.96746	6.31926	-3.62847	0.00060329	0.0118275	-0.575625
Arl6	2.67686	5.11415	3.62715	0.000605791	0.0118629	-0.529355
Fut9	-3.04936	7.54895	-3.62407	0.000611701	0.0119649	-0.600483
Mmp16	-2.23278	6.33864	-3.62359	0.000612625	0.0119655	-0.591693
Hacd2	-1.53279	4.62512	-3.62333	0.00061313	0.0119655	-0.5194
Ppp1r13b	-1.21871	6.47135	-3.62237	0.000614987	0.011988	-0.596154
Slc5a5	-4.07768	1.50102	-3.62154	0.000616606	0.0120059	-0.404298
Cdk1	-10.1374	-1.2004	-3.62009	0.000619422	0.012047	-1.28609
Galnt16	1.07805	5.99938	3.61959	0.000620391	0.0120521	-0.59398
Efcab2	-2.6798	3.77029	-3.61863	0.000622268	0.0120748	-0.466055
Rbbp4	1.42019	7.24162	3.61686	0.000625753	0.0121287	-0.618607
Dtd1	1.36972	5.49858	3.61618	0.000627084	0.0121407	-0.586442
Ndnf	-3.7363	5.47687	-3.61539	0.000628639	0.012157	-0.592577
Gab2	-2.12046	6.36971	-3.61465	0.000630122	0.0121719	-0.617738
Stc1	2.91359	4.31821	3.61399	0.000631421	0.0121832	-0.502159
Grin2d	-2.40732	4.70479	-3.61125	0.000636876	0.0122746	-0.561065
Hmx1	14.1099	-2.04082	3.60928	0.000640832	0.0123369	-2.38644
C9orf72	1.58867	6.09009	3.60815	0.000643127	0.0123672	-0.628988
Mchr1	-2.06917	2.74695	-3.60748	0.00064447	0.012379	-0.423286
Zfp207	1.38903	6.79592	3.60545	0.000648608	0.0124182	-0.648004
Psmc6	2.14009	7.4186	3.60541	0.000648688	0.0124182	-0.652927
Serpinb9	-4.1556	1.31822	-3.60582	0.000647841	0.0124182	-0.46821
Sfxn5	-1.97944	5.13487	-3.60306	0.000653485	0.012496	-0.611646
Ubxn2a	-1.66709	5.34326	-3.602	0.000655661	0.0125096	-0.625223
Lrrc45	-1.87269	5.10048	-3.60211	0.000655434	0.0125096	-0.613101
Ube2j1	-2.17006	7.01557	-3.60162	0.000656457	0.0125108	-0.661705
Sv2c	-2.97321	5.94788	-3.59861	0.000662681	0.0126153	-0.657216
Sesn3	-2.23225	7.26641	-3.59784	0.000664274	0.0126316	-0.675014
Gm2011	2.6183	2.56285	3.59346	0.000673479	0.0127924	-0.449721
Tmem26	-10.9872	-2.71851	-3.59309	0.000674261	0.012793	-2.17327
Sart3	1.44536	5.18549	3.5921	0.000676339	0.012804	-0.639282
Sun2	2.15842	4.44465	3.59218	0.000676183	0.012804	-0.581996
2810001G20Rik	2.63379	3.18996	3.59072	0.000679282	0.0128454	-0.483586
Smg1	-2.06327	7.58685	-3.58997	0.000680885	0.0128615	-0.699832
Pcdh17	-2.55214	7.29081	-3.58921	0.000682511	0.012878	-0.700375
Dnajc5	-1.41781	9.18986	-3.58828	0.0006845	0.0129012	-0.70894
Arpc5	1.27554	7.82333	3.58647	0.00068838	0.0129601	-0.710423
Rps6	1.34066	6.648	3.58447	0.000692722	0.0130131	-0.707447
Uspl1	1.35518	5.77767	3.5846	0.000692434	0.0130131	-0.689412
Stat3	1.40676	6.02955	3.58406	0.000693602	0.0130134	-0.698171
Ccdc120	-1.55358	4.58033	-3.58341	0.000695026	0.0130134	-0.63072
Lrrc24	-2.10409	4.28907	-3.58365	0.0006945	0.0130134	-0.60966
Gnai2	-1.8539	6.74774	-3.58135	0.000699522	0.0130833	-0.718334
Rpl22	2.11613	7.63049	3.57811	0.000706648	0.0132021	-0.733523
Epc1	-1.17106	5.65054	-3.57763	0.000707701	0.0132073	-0.708036
Zfp652	-2.09411	5.76164	-3.5767	0.000709768	0.0132314	-0.713573
Tceal3	-1.47033	5.47229	-3.57548	0.000712475	0.0132674	-0.707346
Fam43a	-3.64011	4.22512	-3.57418	0.000715383	0.0133071	-0.634401
Idh2	-1.46882	4.20656	-3.57199	0.000720297	0.0133839	-0.633398
Dusp23	-2.14138	2.57027	-3.57135	0.000721728	0.0133959	-0.515601
Plcb4	-1.86498	4.76675	-3.56857	0.000728039	0.0134984	-0.687837
Mcm5	-3.24772	1.33997	-3.5682	0.000728872	0.0134992	-0.56024
Tomm40l	-1.86926	4.27946	-3.56567	0.00073467	0.0135624	-0.658971
Iqsec1	-1.81601	6.96875	-3.56595	0.000734024	0.0135624	-0.765127
Pcnx2	-1.41433	4.90315	-3.56588	0.000734173	0.0135624	-0.704495
Tmem115	-1.28763	5.09609	-3.56454	0.000737264	0.0135663	-0.719717
Tmem167	-1.85581	6.38885	-3.56477	0.000736733	0.0135663	-0.761973
Map3k9	-2.74492	7.51575	-3.56476	0.000736745	0.0135663	-0.772401
Gabrr2	-6.75474	-1.03039	-3.56316	0.000740448	0.0135811	-1.33343
Vamp3	2.38889	3.98336	3.56315	0.000740454	0.0135811	-0.622986
Nono	-0.992758	7.5463	-3.56363	0.000739363	0.0135811	-0.775561
Klhdc8a	-1.65906	4.49193	-3.5625	0.000741976	0.0135944	-0.683743
Slc2a13	-2.71382	6.04861	-3.56178	0.000743638	0.0135957	-0.765972
H2bc21	2.74919	2.54075	3.56203	0.000743045	0.0135957	-0.534924
Ppil4	1.3762	5.77185	3.56005	0.000747664	0.0136518	-0.759723
Creb3l1	-3.24367	3.29144	-3.55977	0.000748309	0.0136518	-0.594375
Tmbim6	-1.38555	7.75942	-3.55581	0.000757624	0.013807	-0.79935
Dlec1	4.51848	0.0795025	3.55476	0.000760098	0.0138374	-1.02413
Vstm2b	-2.29983	5.34477	-3.5535	0.000763091	0.013877	-0.765801
Maged2	-1.77685	7.25931	-3.55095	0.000769192	0.0139581	-0.810618
Dhx29	1.14403	5.71077	3.55061	0.000769998	0.0139581	-0.78498
Pcdhac1	-3.66568	1.54784	-3.55071	0.000769749	0.0139581	-0.58605
Bin3	1.4494	3.95976	3.55008	0.000771258	0.0139661	-0.664449
Cntfr	-1.92659	5.64554	-3.54697	0.000778768	0.0140871	-0.795427
Ano4	-2.18456	4.2961	-3.5463	0.000780403	0.0141018	-0.716783
Dnajc6	-1.61097	7.92318	-3.54449	0.00078482	0.0141666	-0.832806
Nfyb	1.81273	4.88343	3.5435	0.000787232	0.0141862	-0.757664
Zfp663	6.80334	0.0798541	3.54326	0.000787817	0.0141862	-1.10767
Cadm2	-2.86051	7.73655	-3.54303	0.000788398	0.0141862	-0.836387
Ctnnb1	1.20054	9.29462	3.54202	0.000790875	0.0142158	-0.842757
Pierce2	2.72049	2.64522	3.53764	0.000801732	0.0143958	-0.603564
Akr1b3	1.2306	5.66825	3.53595	0.000805947	0.0144259	-0.825125
Atf2	-1.62617	6.79311	-3.53629	0.000805102	0.0144259	-0.848995
Disp2	-1.70754	8.05224	-3.53629	0.000805104	0.0144259	-0.856971
Ddr2	-4.50468	3.2777	-3.53558	0.000806879	0.0144275	-0.662809
Phldb1	-1.89098	6.07074	-3.53216	0.000815495	0.0145663	-0.851148
Serpinb6a	1.89848	4.37444	3.53107	0.000818257	0.0146004	-0.752856
Hars2	1.558	4.81343	3.53002	0.000820928	0.0146327	-0.792315
Fzd3	-2.8541	5.67973	-3.5288	0.000824058	0.0146732	-0.84873
Slc25a16	-1.28744	5.06222	-3.52616	0.000830833	0.0147784	-0.826186
Tab3	-1.78395	5.4102	-3.52483	0.000834263	0.014824	-0.850581
Stmn1	1.50099	9.62401	3.52358	0.000837521	0.0148664	-0.895616
Barx2	3.03829	2.08297	3.52321	0.000838479	0.014868	-0.641796
Upf2	1.46545	4.61016	3.52169	0.000842453	0.014923	-0.800538
Tshz2	-4.07956	1.26925	-3.52134	0.000843366	0.0149236	-0.683621
Rpl9	1.41542	8.06524	3.5209	0.000844503	0.0149283	-0.900704
Chl1	-1.63156	10.0393	-3.52051	0.000845533	0.014931	-0.903789
Plekhg4	-2.9934	2.62891	-3.51951	0.000848148	0.0149617	-0.660666
Camkk2	2.14456	6.56307	3.51808	0.000851934	0.015013	-0.897121
Exosc2	1.40369	4.54826	3.51712	0.000854461	0.015042	-0.808708
Rad1	2.00881	3.41804	3.51466	0.000861007	0.0151272	-0.714269
Usp11	-1.27073	7.59627	-3.51464	0.000861068	0.0151272	-0.916891
Clint1	-1.33323	5.75032	-3.51376	0.00086342	0.0151529	-0.894871
Mrpl49	1.27742	5.28615	3.51203	0.000868062	0.0152187	-0.875516
Snn	1.56168	7.15883	3.51158	0.000869271	0.0152243	-0.92159
Inpp5j	-2.72014	5.44101	-3.51051	0.000872147	0.015259	-0.893658
Mfsd11	1.47034	5.12109	3.5101	0.000873258	0.0152628	-0.870529
Abhd5	-1.55206	4.80751	-3.50953	0.000874804	0.0152742	-0.855427
Cenpp	4.53561	0.709439	3.50325	0.000891965	0.0155579	-0.909414
Klhl2	1.22926	7.25329	3.50104	0.000898089	0.0156487	-0.95287
Prrc1	-1.50791	5.50883	-3.49744	0.000908154	0.015808	-0.933092
Cndp1	-13.4582	-3.04616	-3.49653	0.000910702	0.0158362	-2.44172
Msh6	1.3253	4.7145	3.49566	0.000913151	0.0158626	-0.882409
Osgep	1.6761	4.40887	3.4928	0.000921259	0.015971	-0.864961
Tmem178	-1.60413	4.66662	-3.49302	0.000920624	0.015971	-0.894726
Aven	2.47951	2.34009	3.49119	0.000925846	0.0159856	-0.722659
Porcn	-1.5162	5.34538	-3.49162	0.000924612	0.0159856	-0.941156
Zfp746	-1.40066	4.8956	-3.49127	0.00092563	0.0159856	-0.916693
Ptcd3	1.18298	5.62194	3.49193	0.000923746	0.0159856	-0.949194
Ppfia4	-1.6167	6.82801	-3.49007	0.00092905	0.0160247	-0.981547
Plppr4	-1.60551	8.77477	-3.48951	0.000930659	0.0160363	-0.992803
Scn2b	1.22404	6.52508	3.48827	0.000934228	0.0160815	-0.981758
Calca	-3.90566	1.41525	-3.48544	0.000942436	0.0162065	-0.761965
Psmb10	-2.15805	4.62142	-3.48421	0.000946011	0.0162353	-0.918536
Cend1	-1.64127	8.05886	-3.48439	0.000945492	0.0162353	-1.00552
Znrf1	-1.28647	7.06194	-3.48203	0.000952395	0.0163284	-1.00641
Dnase1	-2.7274	2.76977	-3.48099	0.000955458	0.0163481	-0.773451
Zfp444	-1.04336	5.6971	-3.48103	0.000955327	0.0163481	-0.986347
Lin7a	-1.82395	6.19358	-3.48053	0.000956812	0.0163528	-0.999472
Rnf7	1.51821	6.20354	3.48025	0.000957646	0.0163528	-0.99964
Abcg1	1.74061	4.40339	3.47808	0.000964069	0.0164296	-0.904712
Rpl10a-ps1	2.34829	2.84865	3.47838	0.000963181	0.0164296	-0.773832
2900052N01Rik	-5.22779	1.41182	-3.4776	0.000965495	0.0164375	-0.785258
Rad23b	-0.94965	8.21785	-3.47704	0.000967153	0.0164493	-1.02689
Exo5	-1.62306	4.01828	-3.47642	0.000969016	0.0164507	-0.888165
Cited2	-2.9188	6.12106	-3.47637	0.000969163	0.0164507	-1.01152
Carhsp1	2.26706	6.21746	3.47461	0.000974415	0.0165079	-1.01427
Adarb1	-1.43232	6.85345	-3.47403	0.000976158	0.0165079	-1.02739
Arrdc1	-1.78401	4.13907	-3.47411	0.00097592	0.0165079	-0.906145
Nectin1	-1.8238	6.5045	-3.47395	0.000976401	0.0165079	-1.02391
Zfp385c	-11.8234	-2.73842	-3.47292	0.000979515	0.0165311	-2.34846
Pcdha6	-2.20583	3.30453	-3.47286	0.000979704	0.0165311	-0.834522
Med6	2.1939	4.08406	3.47156	0.000983611	0.0165479	-0.893225
Rnf19a	1.6395	5.43965	3.4718	0.000982892	0.0165479	-0.996646
Pip5k1c	-1.47971	8.27639	-3.47157	0.000983597	0.0165479	-1.04257
Rgs16	-2.39275	3.51752	-3.46981	0.000988923	0.0165846	-0.862393
Mrpl9	1.27076	6.04096	3.46932	0.000990414	0.0165846	-1.02726
Triap1	1.39959	4.55028	3.47008	0.000988125	0.0165846	-0.941935
Atp6v0e2	-1.19585	8.7283	-3.46998	0.000988412	0.0165846	-1.04831
Inpp5f	-1.71856	8.84766	-3.46925	0.000990648	0.0165846	-1.05057
Haus1	2.54891	2.75094	3.46868	0.00099239	0.0165975	-0.794269
Txnip	8.11229	4.2041	3.46706	0.000997348	0.0166641	-0.884467
Ptprn	-2.62431	7.70279	-3.46647	0.000999141	0.0166777	-1.05497
Tpcn2	-4.46823	-0.17545	-3.46577	0.00100129	0.0166973	-1.17433
P3h1	-2.21746	3.10907	-3.46382	0.00100734	0.0167654	-0.843869
Slc39a1	1.79466	4.9078	3.46392	0.00100701	0.0167654	-0.98466
Asap1	-1.31855	6.08837	-3.46283	0.00101041	0.0167696	-1.04901
Cxadr	-1.45459	9.24463	-3.46306	0.00100967	0.0167696	-1.06835
Fgd5	-2.58415	2.90354	-3.46279	0.00101054	0.0167696	-0.830369
Bloc1s5	1.53739	4.12648	3.46133	0.00101508	0.016796	-0.927999
Eef1g	1.05768	7.70889	3.46191	0.00101325	0.016796	-1.06722
Emx2os	-4.06575	1.24995	-3.46149	0.00101457	0.016796	-0.836265
Gtf2h3	1.43419	4.33761	3.45696	0.00102879	0.0169899	-0.960161
Pcdha12	-2.40542	3.77616	-3.45711	0.0010283	0.0169899	-0.920914
Ndufs2	0.91997	7.5854	3.45548	0.00103347	0.0170508	-1.08474
Serinc1	-1.47416	9.98187	-3.45465	0.00103613	0.0170781	-1.09158
Aldh18a1	-1.67291	6.38276	-3.45432	0.00103716	0.0170787	-1.07683
Aqp4	-4.78311	2.8375	-3.45376	0.00103895	0.0170917	-0.852766
Anapc1	-1.31693	7.16781	-3.45216	0.00104405	0.0171426	-1.09196
Dnph1	3.21726	1.90921	3.45231	0.00104359	0.0171426	-0.83422
Gpr180	-1.59294	4.23783	-3.45096	0.00104792	0.0171895	-0.978009
Mei1	11.466	-1.94156	3.44965	0.00105214	0.0172422	-2.43274
Pomgnt2	-1.6673	5.25206	-3.44791	0.00105778	0.017318	-1.05999
Hdac2	1.85719	7.41882	3.44736	0.00105955	0.0173303	-1.10637
Ccnd3	-2.9923	3.75148	-3.44446	0.00106901	0.0174683	-0.951156
Tcp1	1.03403	7.71591	3.44123	0.00107967	0.0176257	-1.12579
Tma16	-1.39732	3.78633	-3.44058	0.00108181	0.0176437	-0.966082
Lmtk2	-1.96437	7.24294	-3.4402	0.00108308	0.0176476	-1.12636
Trim8	-2.20943	5.97536	-3.43953	0.00108531	0.017667	-1.1121
Castor2	-1.35449	7.22137	-3.43808	0.00109013	0.0177117	-1.13216
Sdc3	-2.02637	9.32676	-3.4381	0.00109007	0.0177117	-1.13893
Cdh24	-2.34311	3.38749	-3.43701	0.00109371	0.0177531	-0.940211
Gdf9	4.26719	0.295143	3.43339	0.00110588	0.0179166	-1.21136
Adam22	-1.27691	7.63581	-3.43343	0.00110576	0.0179166	-1.14786
Shisa7	-1.46851	6.75719	-3.43269	0.00110828	0.0179384	-1.1434
Cript	1.86887	6.07742	3.43107	0.00111378	0.0180103	-1.13554
Rpl27	1.3839	5.97941	3.42915	0.00112034	0.0180992	-1.13898
Fbxo16	1.72089	3.27201	3.42613	0.00113074	0.0182501	-0.946755
Cd47	-2.17735	8.23064	-3.42504	0.0011345	0.0182934	-1.17422
Ube2d1	1.39156	6.25902	3.42458	0.0011361	0.0183019	-1.15786
Tgfb3	-2.32867	2.70287	-3.42344	0.00114007	0.0183348	-0.923495
Ptpn23	-2.39277	6.30938	-3.42337	0.00114029	0.0183348	-1.16465
Pde11a	-5.05254	0.150997	-3.42305	0.00114141	0.0183356	-1.14872
Mfap3l	-3.05819	6.2092	-3.42244	0.00114355	0.0183526	-1.165
Smyd3	-1.42319	5.01503	-3.42094	0.00114881	0.0184198	-1.12209
Tbc1d8	1.5728	4.37049	3.41882	0.00115628	0.018453	-1.06734
Arid5b	-3.33959	5.019	-3.41967	0.00115327	0.018453	-1.12722
Slc4a10	-1.78284	6.81032	-3.41994	0.00115231	0.018453	-1.17975
Tmem108	-1.50622	4.70849	-3.41921	0.0011549	0.018453	-1.10536
Fam118b	1.41165	4.26505	3.41898	0.00115571	0.018453	-1.05935
Atg13	-1.55462	6.01127	-3.41461	0.00117123	0.0186566	-1.18316
Nrip3	1.96511	7.12865	3.41483	0.00117044	0.0186566	-1.19586
Tbc1d8b	-3.44081	2.96744	-3.4141	0.00117306	0.0186683	-0.96846
Igfbp4	-2.21512	5.59124	-3.41354	0.00117506	0.0186827	-1.17287
Chrna7	-3.05514	5.00068	-3.41246	0.00117894	0.0187271	-1.14604
Bbs12	3.21815	2.0938	3.41205	0.00118042	0.0187331	-0.930988
Cacnb1	-1.39088	6.63134	-3.41151	0.00118234	0.0187462	-1.20122
Haus4	-3.41665	1.24774	-3.41058	0.0011857	0.0187472	-0.969537
Ncoa6	-1.72398	6.51473	-3.41081	0.00118487	0.0187472	-1.20148
Ttc9	-1.20119	5.66517	-3.41064	0.00118551	0.0187472	-1.18393
Arhgap24	-4.57353	3.44798	-3.40791	0.0011954	0.0188832	-1.03006
Gpc2	2.70076	2.48058	3.40699	0.00119877	0.0189015	-0.947822
Rgs3	-1.9879	4.00945	-3.40703	0.00119861	0.0189015	-1.08157
Gm16210	-11.1233	-2.04617	-3.40444	0.0012081	0.0190309	-2.07137
Slc35a1	1.29804	5.17802	3.40241	0.00121559	0.0191312	-1.17709
Ak3	-0.999913	5.73212	-3.40119	0.00122013	0.0191851	-1.21247
Tax1bp3	2.17945	2.82537	3.40059	0.00122237	0.0192025	-0.98134
Rbbp5	1.15333	5.15249	3.39959	0.00122609	0.0192433	-1.18386
Taf5	1.76506	3.45559	3.39916	0.00122768	0.0192506	-1.03587
Myh4	-8.4074	-1.24373	-3.39858	0.00122987	0.0192672	-1.725
Trp73	-2.8656	2.18718	-3.39734	0.00123451	0.0193221	-0.971011
Fbxo34	-1.51293	5.24914	-3.39698	0.00123586	0.0193256	-1.20295
Pclo	-2.67538	8.2987	-3.39636	0.0012382	0.0193445	-1.25492
Dld	1.34277	7.47398	3.39493	0.00124359	0.0194044	-1.25441
Mapk8ip1	-1.20286	8.64221	-3.39474	0.00124431	0.0194044	-1.26039
Recql4	-3.99037	1.73737	-3.39405	0.00124693	0.0194275	-0.978379
Rtca	1.23371	4.98221	3.39316	0.00125032	0.0194626	-1.19096
9430038I01Rik	2.93437	1.61683	3.39227	0.00125371	0.0194976	-1.00057
Hs6st3	-3.63343	4.30896	-3.39156	0.00125641	0.0195218	-1.15453
Thap11	1.184	4.43533	3.38997	0.00126249	0.0195806	-1.15633
Cntn1	-1.35663	9.33092	-3.39017	0.00126172	0.0195806	-1.2737
Dctn6	1.20726	5.37221	3.38876	0.00126713	0.0196348	-1.22714
Sox2	-2.24139	3.84361	-3.38788	0.00127054	0.0196697	-1.11962
Aldh6a1	-1.63459	4.76459	-3.38726	0.00127292	0.0196814	-1.19907
Prim1	2.2405	3.15745	3.38709	0.0012736	0.0196814	-1.03788
Adam15	-1.95603	5.98833	-3.38645	0.00127607	0.0196919	-1.26188
Cyb5b	-1.76173	7.77262	-3.38632	0.00127658	0.0196919	-1.28084
Nlgn3	-1.58424	5.7737	-3.38532	0.00128046	0.0197339	-1.25893
Gnptab	-1.62634	6.77298	-3.38425	0.00128461	0.01978	-1.27927
Myo5a	-2.34001	9.24552	-3.3837	0.00128677	0.0197954	-1.29182
Tcf12	-1.41904	5.5562	-3.3833	0.00128834	0.0198017	-1.25583
Garin1a	-6.51117	-0.88323	-3.38012	0.00130084	0.0199759	-1.61342
Wdr77	1.51541	5.43346	3.37818	0.0013085	0.0200149	-1.25931
Map2k1	-1.56609	7.12866	-3.37741	0.00131156	0.0200149	-1.30135
Cbx1	1.47989	5.6426	3.37823	0.00130832	0.0200149	-1.26908
Sec14l1	-1.22358	7.34031	-3.37741	0.00131159	0.0200149	-1.30311
Eif3m	1.91716	6.55773	3.3788	0.00130603	0.0200149	-1.29077
Tipin	2.013	3.34797	3.37785	0.0013098	0.0200149	-1.08301
Eml1	1.28712	6.20661	3.37745	0.00131141	0.0200149	-1.28923
Wasf3	-1.22957	7.17439	-3.37271	0.0013304	0.0202839	-1.31502
Tubd1	2.69156	2.51642	3.3715	0.00133529	0.0203403	-1.04229
Cdh2	1.30493	7.29537	3.37092	0.00133764	0.0203528	-1.3202
5031425E22Rik	2.24388	3.31529	3.37071	0.0013385	0.0203528	-1.09835
Rbp4	-3.65253	2.86011	-3.36978	0.00134228	0.0203559	-1.08207
Washc4	1.5036	5.7032	3.37002	0.0013413	0.0203559	-1.29444
Nsmce4a	1.95839	4.78998	3.37022	0.00134046	0.0203559	-1.23682
Gm8292	2.56592	3.37164	3.36933	0.00134411	0.0203656	-1.1066
Mta3	-1.48532	5.61622	-3.36735	0.00135217	0.0204696	-1.30316
Psmd2	0.905403	8.34491	3.36557	0.00135946	0.0205617	-1.34081
Zswim4	-1.89899	4.58872	-3.36265	0.00137154	0.020726	-1.25403
Nap1l4	1.00243	7.58657	3.36195	0.00137445	0.0207517	-1.34724
Col14a1	-4.50826	1.6531	-3.35892	0.0013871	0.0209242	-1.07141
Tshr	-2.91057	2.36675	-3.3586	0.00138845	0.0209261	-1.07879
Cdc42bpg	3.65942	1.70765	3.35762	0.00139258	0.0209698	-1.08412
Ankrd39	-2.34517	2.50426	-3.35276	0.00141318	0.0212612	-1.10042
Ruvbl1	1.21929	4.55578	3.35175	0.00141751	0.0213076	-1.27195
Itfg2	-1.75772	4.0635	-3.35141	0.00141898	0.0213109	-1.23855
1600012H06Rik	1.91275	4.79651	3.35038	0.00142339	0.0213584	-1.29245
Pianp	-1.6973	5.78912	-3.34875	0.0014304	0.0214447	-1.35941
Snx17	-1.29381	5.82831	-3.34769	0.00143498	0.0214945	-1.36401
Pld6	-4.27918	1.56732	-3.34704	0.00143781	0.0215181	-1.10544
Cetn3	2.77444	6.09657	3.34674	0.00143909	0.0215183	-1.36992
Npas2	-2.37261	4.25856	-3.34472	0.0014479	0.0216311	-1.27595
Slc9a9	1.88363	3.77595	3.34092	0.00146458	0.0218611	-1.2235
Tbc1d20	0.849268	6.2593	3.33875	0.00147419	0.0219767	-1.39796
Spsb4	-2.08079	3.74468	-3.3386	0.00147489	0.0219767	-1.24219
Bcas2	1.07042	6.07383	3.33693	0.00148234	0.0220684	-1.39897
Gabbr2	-1.41803	7.66979	-3.33462	0.00149267	0.0222028	-1.42403
Rad17	1.83594	4.00216	3.33392	0.00149583	0.0222304	-1.26609
Sema3b	4.59404	0.380416	3.33215	0.00150382	0.0223298	-1.39131
Pecr	2.5036	2.62336	3.33104	0.00150885	0.0223408	-1.15304
Gpr35	-5.67036	0.16034	-3.3313	0.00150768	0.0223408	-1.34224
Armcx1	-1.68671	6.55786	-3.33095	0.00150928	0.0223408	-1.42506
Pcif1	-1.49952	5.34046	-3.33082	0.00150984	0.0223408	-1.39192
Trim32	-0.780176	7.93339	-3.33054	0.0015111	0.0223408	-1.43658
Angpt2	-7.79382	-1.42373	-3.33003	0.00151345	0.0223561	-1.93084
Spred3	-3.39879	5.57746	-3.32932	0.00151666	0.0223842	-1.40784
Usp40	-1.65207	3.56103	-3.32861	0.0015199	0.0224063	-1.25062
Rbm17	1.04842	5.85524	3.32814	0.00152209	0.0224063	-1.41715
Fam222b	-1.93206	4.83595	-3.32839	0.00152094	0.0224063	-1.36723
Arpc3	1.1629	7.54189	3.32763	0.00152441	0.0224211	-1.44207
Ralgapb	-1.52551	7.09824	-3.32609	0.00153148	0.0225056	-1.4439
Nars	-1.76348	8.11023	-3.32569	0.00153332	0.0225132	-1.45079
Lims1	1.3481	5.06408	3.32468	0.00153798	0.0225477	-1.38175
Bex3	-1.35637	7.8657	-3.32461	0.00153831	0.0225477	-1.45274
Aff2	-2.5859	4.60843	-3.32397	0.00154126	0.0225717	-1.3606
Rnf31	-1.68448	4.30805	-3.32271	0.00154714	0.0226383	-1.33967
Psmc4	1.09711	6.57942	3.32192	0.00155082	0.0226462	-1.4492
Rcn2	-1.56642	6.66811	-3.32174	0.00155165	0.0226462	-1.45109
Fgf1	-4.18304	1.67556	-3.32222	0.00154941	0.0226462	-1.16227
Flot1	-1.42434	6.36519	-3.32141	0.0015532	0.0226494	-1.44866
Cacng2	-1.47539	6.06433	-3.32012	0.00155922	0.0226984	-1.44613
Sirpa	-1.82627	6.81853	-3.32036	0.00155812	0.0226984	-1.45633
Nfxl1	-1.90067	4.14676	-3.31975	0.00156097	0.0227045	-1.33331
Cox6a2	-4.00204	3.62798	-3.31828	0.00156788	0.0227757	-1.28888
Ptpn5	-1.14698	7.57636	-3.31808	0.00156883	0.0227757	-1.46919
Tmem62	-1.3869	4.83065	-3.31786	0.00156986	0.0227757	-1.39429
Cdc34	1.74444	5.55017	3.3161	0.00157817	0.0228003	-1.43658
Nedd4l	-1.18937	6.79843	-3.31609	0.00157824	0.0228003	-1.46866
Lrrc57	1.8052	3.85257	3.31637	0.00157688	0.0228003	-1.29665
Prkag1	1.79614	3.9091	3.31718	0.00157304	0.0228003	-1.3023
Gm17999	-12.9967	-3.46122	-3.31659	0.00157586	0.0228003	-2.83809
B3glct	-1.80923	4.50183	-3.31426	0.00158692	0.0228873	-1.37843
Exoc6	1.15335	5.93827	3.31425	0.00158694	0.0228873	-1.45728
Nsg2	0.819322	10.3277	3.31193	0.00159804	0.0230085	-1.48993
Aak1	-1.40944	8.151	-3.31205	0.00159748	0.0230085	-1.48864
Celf6	-1.94622	6.17564	-3.31075	0.00160373	0.023071	-1.4748
Frem1	-4.22813	0.455404	-3.31013	0.00160671	0.0230945	-1.32586
Slc10a3	2.78372	1.3725	3.30968	0.00160889	0.0231064	-1.22428
Mib2	-1.96268	7.08729	-3.30855	0.00161432	0.0231513	-1.49227
Tdrd7	1.13801	4.87406	3.30847	0.00161473	0.0231513	-1.41618
Nfat5	-1.99779	5.20954	-3.30786	0.00161766	0.0231738	-1.44798
St6gal2	-1.80202	6.78513	-3.30599	0.00162676	0.0232846	-1.49645
Erbb4	-2.5583	7.87317	-3.30488	0.0016322	0.0233429	-1.50721
Atp8a1	-1.46957	8.24327	-3.30299	0.00164147	0.0234558	-1.51389
Eif3f	1.13818	6.82407	3.30199	0.00164637	0.0235062	-1.50692
Arpc2	1.10586	7.79344	3.30157	0.00164845	0.0235107	-1.51535
Chst11	1.55029	6.02426	3.30137	0.00164944	0.0235107	-1.49359
Megf9	-1.54327	7.13517	-3.29993	0.0016566	0.0235931	-1.51626
Btbd11	-2.08425	5.21815	-3.29848	0.00166378	0.0236073	-1.47425
Gng4	-2.73594	8.19379	-3.29839	0.00166424	0.0236073	-1.52644
Eef1b2	1.69475	7.84103	3.29889	0.00166175	0.0236073	-1.52282
Ust	-2.05656	5.06241	-3.29833	0.00166451	0.0236073	-1.46246
Tmem178b	-1.59301	8.42626	-3.29898	0.00166131	0.0236073	-1.52544
Zfyve28	1.38983	4.2102	3.29629	0.00167471	0.0237322	-1.39008
Cbwd1	1.77645	4.09221	3.29416	0.00168545	0.0238647	-1.38335
Txndc11	-1.45108	5.25493	-3.2934	0.00168925	0.0238789	-1.48995
Snrpe	2.30428	5.13958	3.29354	0.00168857	0.0238789	-1.47288
Pdpk1	-1.80259	7.08265	-3.29263	0.00169319	0.0238832	-1.5359
Maob	-4.21347	0.59832	-3.29263	0.00169315	0.0238832	-1.33613
Cmtr2	2.07699	3.34868	3.29251	0.00169376	0.0238832	-1.31053
Dmrtb1	3.95986	1.82968	3.29013	0.00170585	0.024034	-1.24815
Dnal1	-1.77564	6.27857	-3.28947	0.00170925	0.0240593	-1.53451
Slc25a40	2.34901	3.6684	3.28923	0.00171047	0.0240593	-1.35031
Ampd3	-2.57511	2.0838	-3.28825	0.0017155	0.0241101	-1.25011
Slc24a4	-2.8986	3.97074	-3.28529	0.00173073	0.0243042	-1.41284
Gna13	1.71049	5.19169	3.28138	0.00175106	0.0245147	-1.50931
Slc39a7	-2.50226	2.81734	-3.28179	0.00174891	0.0245147	-1.30932
Tsc22d2	-2.36193	5.92283	-3.28156	0.0017501	0.0245147	-1.54971
Rpp38	2.88336	2.71192	3.2813	0.00175146	0.0245147	-1.2867
Nfkbil1	-2.622	2.66387	-3.281	0.00175307	0.0245171	-1.29999
Dscam	-1.45296	6.31297	-3.27979	0.0017594	0.0245654	-1.56255
Gm5113	-1.29657	5.39999	-3.28006	0.00175796	0.0245654	-1.53123
Mkx	-2.05089	2.86759	-3.27942	0.00176133	0.0245723	-1.3177
Eef1a1	0.970712	11.5974	3.27805	0.00176852	0.0246445	-1.58025
Atp1b2	-1.53126	7.32456	-3.27789	0.00176939	0.0246445	-1.5779
Mcph1	-1.52839	3.94995	-3.27753	0.00177131	0.0246511	-1.42761
Ltbp3	-2.77697	2.8855	-3.27243	0.00179844	0.0249904	-1.33807
Ubac1	1.00062	6.67559	3.2724	0.00179862	0.0249904	-1.58638
Amigo1	-1.03433	6.18986	-3.26716	0.00182689	0.0253625	-1.59463
Slc9a1	-1.71021	5.21477	-3.26574	0.00183464	0.0254495	-1.56252
Gid8	1.02754	5.68406	3.26537	0.00183665	0.0254566	-1.58205
Lcn2	18.2877	-3.25986	3.26427	0.00184268	0.0255196	-3.3532
1700120C14Rik	5.07309	-0.490136	3.26392	0.0018446	0.0255254	-1.84874
Ppp3ca	1.96693	8.14798	3.26266	0.00185152	0.0255879	-1.62338
Nkapd1	1.88765	5.0597	3.26256	0.00185211	0.0255879	-1.55092
Cenpk	4.04179	1.18233	3.26081	0.00186173	0.0257001	-1.36752
Pdgfb	-2.02698	4.17584	-3.26033	0.00186441	0.0257162	-1.49649
Bcl2l13	-1.2779	5.96814	-3.2589	0.00187237	0.0257978	-1.6112
Sez6l2	-1.95136	8.07793	-3.25845	0.00187486	0.0257978	-1.63524
Zmiz2	-1.98099	7.77632	-3.25861	0.00187397	0.0257978	-1.63336
Eif3b	1.19055	7.24647	3.25747	0.00188036	0.0258527	-1.63236
Hck	-4.16365	0.50766	-3.25497	0.00189435	0.0259758	-1.4433
Itm2c	1.71043	7.43535	3.25479	0.0018954	0.0259758	-1.64084
Rhno1	1.85113	3.33604	3.25537	0.00189214	0.0259758	-1.4077
Htatsf1	1.35944	6.31092	3.25511	0.00189356	0.0259758	-1.62799
Hmgn1	-1.21429	5.52071	-3.25204	0.00191091	0.0261673	-1.61472
Mcl1	1.08884	6.7472	3.25005	0.00192226	0.0263017	-1.64788
Lama4	-3.65741	2.04394	-3.24756	0.00193654	0.0263914	-1.35305
Adam7	-10.8669	-3.64091	-3.2477	0.00193569	0.0263914	-3.00629
Paip1	1.51515	6.38074	3.24778	0.00193523	0.0263914	-1.64899
Fbxo44	-1.54997	5.8895	-3.24826	0.00193252	0.0263914	-1.63855
Unc5d	-1.74599	6.64799	-3.24827	0.00193242	0.0263914	-1.65261
Dynll1	1.58138	7.74461	3.24652	0.0019425	0.0264514	-1.66536
Fam181a	-3.7266	2.46752	-3.24425	0.00195563	0.026609	-1.38254
Ccdc58	2.57571	3.65062	3.24311	0.00196225	0.0266779	-1.47012
Kifc2	-1.30951	7.81812	-3.24024	0.00197902	0.0268844	-1.68345
Retreg3	0.930333	6.50584	3.23972	0.00198207	0.0268931	-1.67309
Hdac3	0.795742	6.77519	3.2396	0.00198281	0.0268931	-1.67681
Pxmp4	1.42987	4.52643	3.23899	0.00198639	0.0269061	-1.57474
Wdr25	1.74759	3.01334	3.2389	0.00198692	0.0269061	-1.42301
Trappc4	1.31508	6.48891	3.2385	0.00198928	0.0269168	-1.6758
Ppat	1.25564	4.85753	3.23715	0.00199724	0.0270031	-1.60753
St3gal2	-1.91389	6.43704	-3.23675	0.00199962	0.0270139	-1.68124
St3gal6	-4.47813	1.76807	-3.23601	0.00200402	0.0270292	-1.37747
Zkscan16	2.74248	3.15152	3.23549	0.00200708	0.0270292	-1.44038
Gas8	1.42927	4.56619	3.2356	0.00200644	0.0270292	-1.58695
Tdrp	3.14987	1.77397	3.2358	0.00200522	0.0270292	-1.38108
Caskin1	-1.67414	7.40456	-3.23363	0.00201819	0.0271573	-1.69905
Arpc5l	1.07448	6.06066	3.23319	0.00202079	0.0271709	-1.68237
Zfp180	-1.21182	5.74605	-3.23197	0.00202812	0.027248	-1.67835
Abcd2	-2.15489	3.09992	-3.22991	0.0020405	0.0273927	-1.46751
Eps8l1	-2.05444	2.7091	-3.22915	0.00204512	0.0274068	-1.43539
Khsrp	-1.24759	6.40377	-3.22894	0.00204636	0.0274068	-1.70145
Psmd13	1.18237	7.12264	3.22918	0.00204493	0.0274068	-1.70813
Apba1	-1.41739	8.95593	-3.22716	0.0020572	0.0275304	-1.72236
P3h2	-5.47416	-0.30421	-3.22641	0.00206175	0.0275697	-1.69744
Vldlr	-1.5049	7.75439	-3.2257	0.00206609	0.0275775	-1.72254
Pds5a	1.18662	5.82432	3.22604	0.00206398	0.0275775	-1.69396
Hsd17b11	-1.54023	3.65957	-3.2254	0.00206791	0.0275775	-1.53673
Adam17	2.58327	3.66066	3.22526	0.0020688	0.0275775	-1.51738
Perp	3.09818	1.70108	3.22127	0.0020933	0.0278823	-1.41812
Ttpal	-1.23858	5.90974	-3.2202	0.00209994	0.0278839	-1.71571
Arl13b	2.23089	3.61214	3.22029	0.00209938	0.0278839	-1.52731
Cx3cl1	-1.39569	7.24755	-3.2204	0.00209869	0.0278839	-1.73367
Dtx3	-1.21408	7.29704	-3.22025	0.00209965	0.0278839	-1.73439
Pcdhb22	-1.30961	4.54716	-3.21913	0.00210661	0.0279298	-1.63895
Gm15663	-1.92093	2.54142	-3.21912	0.00210667	0.0279298	-1.44861
Ddt	2.46053	2.33317	3.21745	0.00211708	0.0279808	-1.43202
Ppm1l	-3.09164	7.78187	-3.21757	0.00211629	0.0279808	-1.74486
Arhgap39	-1.44646	6.15156	-3.21805	0.00211332	0.0279808	-1.72636
Flrt2	-1.72805	6.75214	-3.21775	0.0021152	0.0279808	-1.73659
Nudt14	2.49078	2.7792	3.21662	0.00212223	0.0280272	-1.45975
Baiap2	2.05066	5.90247	3.21633	0.00212407	0.0280299	-1.72046
Adck1	1.15074	5.40587	3.21494	0.0021328	0.0281233	-1.70495
Mpzl3	2.81581	1.9313	3.21427	0.00213706	0.0281578	-1.43113
Limch1	1.49273	7.09961	3.21346	0.00214212	0.0281951	-1.75024
Isg20l2	1.22704	4.25129	3.21329	0.00214319	0.0281951	-1.61823
Amz2	1.5177	7.61876	3.21247	0.00214841	0.0282419	-1.75659
Oard1	1.89626	3.06556	3.21213	0.00215057	0.0282486	-1.49513
Ing5	1.18627	3.9622	3.2112	0.00215647	0.0283044	-1.5936
Nsmce1	1.772	4.74526	3.21019	0.00216294	0.0283674	-1.6686
Tenm1	-2.39194	8.21559	-3.20936	0.00216818	0.0284143	-1.76875
Slitrk5	-1.18054	6.40411	-3.20875	0.0021721	0.0284438	-1.75587
Psmc2	1.19638	6.47841	3.20824	0.00217538	0.028465	-1.7575
Zyx	-2.65902	5.05642	-3.2074	0.00218076	0.0285136	-1.71226
Itsn2	-1.63919	5.05085	-3.2051	0.00219563	0.0286641	-1.71651
Atrn	-1.67606	7.64303	-3.2052	0.00219496	0.0286641	-1.7773
Denr	1.14845	5.80712	3.20436	0.00220039	0.0287042	-1.75202
Pou2f2	2.32172	2.58135	3.20153	0.00221883	0.0289227	-1.4844
Grina	-1.21208	7.30962	-3.19899	0.00223547	0.0291028	-1.79176
Gpn3	1.45761	4.06156	3.19872	0.00223726	0.0291028	-1.6366
Ina	-1.41114	8.60042	-3.19864	0.00223776	0.0291028	-1.79862
Tmem74bos	-7.72048	-1.74967	-3.19816	0.00224095	0.0291222	-2.30224
Rpl6	1.12047	7.59097	3.19763	0.00224441	0.0291228	-1.79669
Zfp664	-1.22986	6.12501	-3.19784	0.00224303	0.0291228	-1.78059
Prkci	-1.85751	5.66255	-3.19737	0.00224616	0.0291234	-1.76746
Emc8	-1.17757	5.76247	-3.19656	0.00225152	0.0291264	-1.77367
Dnajc8	1.03038	6.24792	3.19679	0.00224997	0.0291264	-1.78463
Tle5	-1.46124	8.25368	-3.19685	0.0022496	0.0291264	-1.80255
Immp2l	3.15003	1.40412	3.19573	0.00225698	0.029175	-1.49528
Carmil3	-1.39777	7.49649	-3.1954	0.00225922	0.0291766	-1.80275
6820431F20Rik	-2.14886	2.64086	-3.19494	0.00226223	0.0291766	-1.51825
Pcdha5	-1.80318	3.90598	-3.19519	0.00226058	0.0291766	-1.64234
Amot	-2.87592	3.71168	-3.19425	0.00226688	0.0292145	-1.62169
Rtcb	1.06634	7.19187	3.19309	0.00227462	0.029226	-1.80603
Pcna	1.56761	5.62137	3.19341	0.00227246	0.029226	-1.77203
Slc8a2	-1.75175	6.84036	-3.19332	0.00227306	0.029226	-1.80285
Ptprh	3.15918	1.07945	3.19335	0.00227287	0.029226	-1.53631
Os9	-1.50447	7.48733	-3.19243	0.00227901	0.0292605	-1.81067
Rbfox1	-1.60012	6.70075	-3.19114	0.0022877	0.029284	-1.80741
Dync2li1	1.6115	4.23409	3.19147	0.00228547	0.029284	-1.67134
St3gal4	1.34634	3.95417	3.19128	0.00228672	0.029284	-1.64438
A230083G16Rik	-3.36695	0.483564	-3.19132	0.00228648	0.029284	-1.58621
Smg7	-1.68887	6.46831	-3.18804	0.00230863	0.0295298	-1.81234
Cntnap4	-3.36346	6.36483	-3.18735	0.00231329	0.0295672	-1.81244
Nlrp6	5.16206	-0.0691268	3.18584	0.00232359	0.0296766	-1.85662
Rab6b	-2.78272	10.1081	-3.18497	0.00232952	0.0297301	-1.83507
Ccser1	-1.48545	3.88683	-3.18445	0.00233307	0.0297532	-1.66752
Kptn	-1.90263	4.05255	-3.1822	0.00234851	0.0299277	-1.69282
Cadps2	-2.33838	6.01713	-3.18163	0.00235243	0.0299553	-1.82137
Rab8a	-0.918256	5.61699	-3.17935	0.00236827	0.0301346	-1.81397
Rps20	1.64738	7.55363	3.17843	0.00237461	0.0301928	-1.84779
Zfp580	-1.60597	4.32	-3.1764	0.00238883	0.030351	-1.73177
Lrrc42	1.3413	4.54647	3.1757	0.00239371	0.0303678	-1.74502
Gpr135	-2.56647	2.55162	-3.1758	0.00239304	0.0303678	-1.56188
Plekha1	0.967381	6.48191	3.17462	0.00240134	0.0304419	-1.84773
Elmod3	1.50679	3.51815	3.17432	0.00240345	0.0304461	-1.64061
Cmpk2	2.01468	4.04072	3.17328	0.00241074	0.0304595	-1.69842
Dock6	-2.93509	1.74259	-3.17348	0.00240936	0.0304595	-1.53106
Nrep	1.58098	9.8863	3.1737	0.00240778	0.0304595	-1.86593
Lyar	1.53954	3.44544	3.17315	0.00241165	0.0304595	-1.63771
Lyrm9	0.943867	6.48739	3.17238	0.00241711	0.030506	-1.85407
Pdzd4	1.03683	7.59988	3.16899	0.00244123	0.0307732	-1.87351
Psmd11	0.973716	6.28108	3.16865	0.00244369	0.0307732	-1.86068
Thap12	1.03278	6.19069	3.16888	0.002442	0.0307732	-1.85797
Cbfa2t3	-2.67798	3.84334	-3.16769	0.00245054	0.0307853	-1.70891
Xrcc4	2.55542	3.91781	3.16751	0.00245186	0.0307853	-1.69597
Slc25a23	-1.99156	7.72024	-3.16803	0.00244808	0.0307853	-1.87743
Mtarc2	1.51959	5.05021	3.1677	0.00245046	0.0307853	-1.80745
Zdhhc21	-2.02771	6.47015	-3.16613	0.00246175	0.0308574	-1.87085
Tacc2	1.00746	6.68822	3.16595	0.00246303	0.0308574	-1.87372
Ppp1r14a	-12.2677	-3.055	-3.16634	0.00246021	0.0308574	-2.85336
Ankrd13b	-1.40579	7.22176	-3.16461	0.00247275	0.0309565	-1.88329
Gria1	-2.16585	8.71458	-3.16337	0.00248169	0.0310003	-1.89332
Fam229b	2.27771	3.76184	3.16354	0.00248049	0.0310003	-1.6932
Kcnq3	-2.5505	6.65461	-3.16376	0.00247886	0.0310003	-1.87914
Appbp2	-1.48368	7.13372	-3.16016	0.00250512	0.0312472	-1.89447
Kcnb1	-1.65872	6.41201	-3.16017	0.00250503	0.0312472	-1.88665
Nisch	-1.16539	9.07675	-3.15941	0.00251058	0.0312925	-1.90442
Hcn2	-1.77159	6.35515	-3.15875	0.00251544	0.0313301	-1.88965
Gtf2e2	2.39867	4.90326	3.15686	0.00252936	0.0314805	-1.82042
Rpgr	1.78414	4.54708	3.15643	0.00253253	0.0314971	-1.79392
Slc30a4	-1.62806	6.35751	-3.15572	0.00253785	0.0315402	-1.89628
Selenoi	-1.78476	7.00975	-3.15398	0.00255072	0.0316771	-1.90997
Nwd1	-2.91196	3.61984	-3.15269	0.00256036	0.0317738	-1.72558
Med8	1.12099	4.89171	3.15166	0.00256804	0.0317866	-1.8393
Gipc1	-1.72063	5.55432	-3.15177	0.00256724	0.0317866	-1.88554
Cutc	3.07203	1.4614	3.15156	0.00256884	0.0317866	-1.59537
Nap1l1	1.65721	7.67236	3.15179	0.0025671	0.0317866	-1.91964
Tef	1.1949	6.57929	3.15041	0.0025775	0.0318707	-1.91328
Arhgef6	-2.48215	3.35839	-3.1476	0.00259865	0.0321046	-1.7045
Crlf2	-3.38337	4.35371	-3.1474	0.00260018	0.0321046	-1.8178
Dsn1	-1.98271	2.1205	-3.14617	0.00260956	0.0321971	-1.60676
Sptbn1	-1.50075	10.412	-3.14587	0.00261182	0.0322018	-1.93908
Phyhd1	3.44594	0.647461	3.14495	0.0026188	0.0322646	-1.71237
Rpl7	1.94583	8.68481	3.14384	0.00262735	0.0323466	-1.94518
Pus10	1.77134	3.58007	3.14274	0.00263576	0.0324037	-1.72964
Coro6	-2.82237	2.58012	-3.14273	0.00263579	0.0324037	-1.64456
Fbxl20	-1.16372	5.8394	-3.14234	0.00263879	0.0324173	-1.92082
Sh3d19	-1.55816	5.09887	-3.14139	0.0026461	0.0324738	-1.88885
Vps18	-1.37323	5.59942	-3.14125	0.0026472	0.0324738	-1.91577
Clgn	-1.41751	4.24669	-3.13987	0.0026579	0.0325817	-1.82201
Kdm1b	1.26324	5.02158	3.13931	0.00266219	0.0326109	-1.88011
Vip	-5.45507	2.54422	-3.1378	0.00267395	0.0326379	-1.65634
Cat	1.69816	5.74683	3.13783	0.00267374	0.0326379	-1.92633
Sipa1l3	-1.71886	5.30002	-3.13805	0.00267199	0.0326379	-1.90969
Heca	-1.47412	5.36176	-3.13829	0.00267016	0.0326379	-1.91196
Sh3bgr	-4.53314	0.499172	-3.13823	0.00267063	0.0326379	-1.69707
2410006H16Rik	-2.41181	6.00141	-3.13662	0.00268313	0.0327265	-1.94242
Rhoq	-1.4729	4.79135	-3.13545	0.00269227	0.0328146	-1.88022
Ccdc177	-1.67821	4.23349	-3.13476	0.00269767	0.0328335	-1.83233
Gm3362	5.6065	-0.412772	3.13492	0.00269647	0.0328335	-2.05315
Khdrbs3	1.17266	7.05769	3.13335	0.00270879	0.0329453	-1.96416
Pten	-1.49362	7.9245	-3.13237	0.00271655	0.0330162	-1.97326
Ssrp1	0.933364	7.01211	3.13123	0.00272557	0.0331024	-1.96946
Rab11fip2	-1.25873	6.11603	-3.12987	0.00273638	0.0332099	-1.96131
2310030G06Rik	11.5429	-2.04377	3.12919	0.00274176	0.0332516	-2.86755
Sidt2	-3.28069	6.69946	-3.12698	0.00275942	0.0334421	-1.97797
Coq8a	3.85983	2.28357	3.12608	0.00276664	0.0335057	-1.65339
Ugt8a	-4.95647	0.643688	-3.12549	0.00277138	0.0335156	-1.70262
Gap43	0.900168	10.0885	3.12561	0.00277045	0.0335156	-1.99364
Nrg3	-1.39457	5.53179	-3.12394	0.00278387	0.0336428	-1.95842
Slc35f6	-1.341	4.9681	-3.12299	0.00279159	0.0337124	-1.92767
Lama1	-2.85933	2.34137	-3.12162	0.00280267	0.0337983	-1.68367
Nog	-2.99275	1.75525	-3.12166	0.0028024	0.0337983	-1.6574
Plin5	-4.49444	0.048604	-3.1208	0.00280941	0.0338556	-1.82414
Psmb7	1.58508	6.57324	3.12009	0.00281517	0.0339012	-1.99382
Cnga2	-9.38662	-2.50152	-3.11666	0.00284336	0.0342074	-2.7124
Pdlim3	-4.22832	2.36072	-3.1165	0.0028446	0.0342074	-1.69969
C2cd4b	-10.9377	-3.01511	-3.11624	0.00284679	0.0342095	-2.89863
Rpf1	1.61316	3.80718	3.11596	0.00284912	0.0342135	-1.82432
Tcap	-5.68206	1.57364	-3.11313	0.00287253	0.0344054	-1.67672
Necap2	-1.78701	4.34284	-3.11346	0.0028698	0.0344054	-1.90208
Kcnc3	-2.41907	4.61959	-3.11306	0.00287316	0.0344054	-1.92711
1700086L19Rik	3.20776	4.02218	3.11352	0.0028693	0.0344054	-1.8431
Bckdk	-1.31199	4.6183	-3.1126	0.00287697	0.0344269	-1.92759
Igbp1	1.39835	5.24596	3.11143	0.00288675	0.0344546	-1.96999
Tnks	-1.53519	8.22706	-3.11156	0.0028857	0.0344546	-2.02963
Ap4b1	2.83322	1.23692	3.112	0.00288202	0.0344546	-1.70062
St8sia3	-1.27384	6.97753	-3.11123	0.00288844	0.0344546	-2.02273
Gm15825	-5.37839	-0.530818	-3.11088	0.00289139	0.0344546	-2.00503
Gm16861	-4.47739	-0.0286531	-3.11094	0.00289087	0.0344546	-1.85784
Adar	-2.43022	7.41894	-3.10947	0.0029032	0.0345712	-2.03114
Smarcal1	-1.08015	5.46109	-3.10906	0.00290667	0.0345884	-1.99402
Rgmb	-1.40011	6.68118	-3.10858	0.00291068	0.034612	-2.02655
Ankrd34a	-2.03653	4.76388	-3.10827	0.00291329	0.0346189	-1.95136
Gm15545	6.26971	-0.575086	3.10758	0.00291915	0.0346644	-2.20091
Plcg2	-4.48465	-0.470812	-3.10562	0.00293572	0.0348369	-2.00081
Rfc5	1.7265	3.72859	3.1051	0.00294013	0.034865	-1.84301
Pggt1b	-1.85645	4.052	-3.10432	0.00294681	0.0348716	-1.89589
Gfod1	-2.35206	6.01467	-3.10452	0.00294511	0.0348716	-2.02626
Mab21l1	-5.39171	-0.678234	-3.10435	0.00294652	0.0348716	-2.0601
Tcp11l1	-2.03361	4.86067	-3.104	0.00294956	0.0348799	-1.97126
Psma6	1.56879	6.9447	3.10341	0.00295451	0.0349144	-2.04202
Comtd1	-2.45682	1.63581	-3.10284	0.00295943	0.0349483	-1.70127
4833420G17Rik	0.994717	4.71247	3.10253	0.00296206	0.0349552	-1.95381
Cyb5r3	-1.78779	6.73253	-3.10097	0.00297548	0.0350893	-2.04736
Sbk1	1.13884	9.0169	3.09886	0.00299369	0.0352796	-2.0647
Tfb2m	-1.58433	3.33283	-3.09677	0.00301185	0.0354692	-1.83114
Ndufs5	1.69043	5.21348	3.09586	0.00301973	0.0355375	-2.00817
Gpkow	1.05789	5.98125	3.09522	0.00302536	0.0355547	-2.04763
Snhg12	-2.02255	4.4218	-3.09533	0.00302437	0.0355547	-1.95772
Flnb	-1.77318	5.52705	-3.09474	0.00302953	0.0355793	-2.03543
Rps10	1.34789	6.93626	3.09439	0.00303256	0.0355904	-2.06576
Adra1a	-3.91564	3.48178	-3.09335	0.0030417	0.0356731	-1.86808
Mrps23	1.18478	5.51393	3.09295	0.0030452	0.0356897	-2.0347
Hs3st1	-2.20501	5.87107	-3.09269	0.00304748	0.0356919	-2.05382
Xk	-1.99352	3.83363	-3.09193	0.00305424	0.0357337	-1.90205
Ing3	1.51908	3.83968	3.09181	0.00305523	0.0357337	-1.89064
Erh	1.4205	5.053	3.09137	0.00305913	0.0357547	-2.00895
Anks1	1.59235	5.72712	3.09106	0.00306192	0.0357629	-2.04759
Gm3551	-10.0331	-3.36389	-3.08955	0.00307525	0.035894	-3.07819
LTO1	1.15868	4.18903	3.0892	0.0030784	0.0359031	-1.93778
Akr1b10	-2.48878	1.90265	-3.08899	0.00308023	0.0359031	-1.74038
Pacc1	1.46055	4.38357	3.08875	0.00308234	0.0359031	-1.9568
Trnp1	-1.86355	6.39391	-3.08757	0.00309284	0.0360009	-2.07856
Ovca2	2.29375	2.52685	3.08724	0.00309582	0.0360111	-1.76908
Tmem259	-1.56721	6.26525	-3.08692	0.0030987	0.03602	-2.07807
N4bp1	-1.30057	5.51036	-3.08653	0.00310215	0.0360356	-2.0558
Slc7a3	-3.28556	5.92922	-3.08608	0.00310619	0.036058	-2.07355
Mas1	3.40308	1.66799	3.08533	0.00311288	0.0361111	-1.74452
Wdr53	1.66634	3.11605	3.0849	0.00311673	0.036126	-1.82848
Cers6	-1.40621	7.07818	-3.08472	0.0031184	0.036126	-2.09331
Rbfox2	1.05222	9.14343	3.0842	0.00312305	0.0361554	-2.10334
Pex5	-1.50034	6.95707	-3.08109	0.00315121	0.036443	-2.10135
Chrm3	-1.72157	4.48269	-3.08098	0.00315216	0.036443	-1.99921
Ppargc1a	-2.13244	6.19882	-3.07999	0.00316117	0.0365224	-2.09462
Snx6	1.62672	6.28528	3.07911	0.00316922	0.0365907	-2.09647
Scai	-2.04176	7.12531	-3.07847	0.00317507	0.0366319	-2.11017
Phc1	-1.58256	5.91576	-3.07825	0.00317708	0.0366319	-2.09245
Dleu2	-2.13321	2.07742	-3.07714	0.00318727	0.0367245	-1.77662
Rskr	-8.0621	-2.76696	-3.07541	0.00320313	0.0368824	-2.88142
Mindy2	-1.64489	6.54718	-3.07117	0.00324243	0.0373098	-2.12257
Acap3	1.46193	7.67902	3.07043	0.00324932	0.0373639	-2.13423
Irak2	-2.40525	1.69733	-3.06914	0.00326143	0.0374711	-1.7823
Gm21092	-1.64194	4.45912	-3.06897	0.00326303	0.0374711	-2.02658
Abca13	-6.4843	-1.59357	-3.06822	0.00327006	0.0375014	-2.45295
Hip1	-2.26781	7.97393	-3.06831	0.00326916	0.0375014	-2.14219
Tor2a	-1.53281	4.1057	-3.06763	0.00327565	0.0375402	-1.99149
Vwa5a	-2.75737	4.08323	-3.06709	0.00328071	0.0375618	-1.99344
Pacsin1	-1.0799	7.11441	-3.06696	0.00328193	0.0375618	-2.14007
Batf3	-8.50923	-1.79676	-3.06629	0.00328824	0.037589	-2.49676
Usp49	-1.4911	4.00693	-3.06624	0.00328871	0.037589	-1.98839
Polr1f	2.03835	4.0084	3.0642	0.00330802	0.0376507	-1.97832
Pak2	-1.60975	5.81147	-3.06448	0.00330539	0.0376507	-2.12542
Dnm2	1.19344	5.74016	3.06458	0.00330447	0.0376507	-2.11923
Exoc6b	-1.25223	6.54926	-3.06498	0.00330064	0.0376507	-2.1394
Cipc	-1.01456	5.89425	-3.06437	0.00330643	0.0376507	-2.12783
Ubr7	1.03944	5.5708	3.06404	0.00330954	0.0376507	-2.11173
Kcmf1	-1.46829	6.28365	-3.06448	0.00330542	0.0376507	-2.13679
Nr3c2	-2.20146	3.26257	-3.06331	0.00331654	0.0377052	-1.91452
Brsk1	-1.26647	7.90675	-3.06218	0.00332731	0.0377774	-2.15777
Gas2l3	-3.49027	2.07233	-3.06229	0.0033262	0.0377774	-1.81235
Psma2	1.33664	6.94064	3.061	0.0033386	0.0378804	-2.15312
Gsto1	1.2179	5.54581	3.06033	0.00334496	0.0379021	-2.12141
Zfp541	10.0814	-1.9214	3.06053	0.00334307	0.0379021	-2.89355
Rwdd4a	1.984	4.80086	3.05986	0.00334954	0.0379103	-2.06766
B3gat1	-1.07911	7.85716	-3.0598	0.00335012	0.0379103	-2.16365
Tmed4	1.03176	5.6396	3.05891	0.00335866	0.0379817	-2.12984
Sel1l	-1.33093	7.39328	-3.05746	0.00337265	0.0380643	-2.16699
Ypel1	2.12425	5.74042	3.05759	0.0033714	0.0380643	-2.13335
Haus8	1.54287	4.73272	3.0578	0.00336936	0.0380643	-2.06924
Pcdh11x	-2.72084	7.12351	-3.05673	0.00337969	0.0381187	-2.16713
Tmem145	-1.2614	5.78919	-3.05641	0.00338282	0.0381287	-2.14514
Mrs2	-1.55055	3.90062	-3.05559	0.00339076	0.038193	-2.00336
Sorbs1	-1.51197	5.33902	-3.05517	0.00339489	0.0382143	-2.1281
Slco5a1	1.93054	5.19801	3.05388	0.0034074	0.0383299	-2.11282
Aimp1	1.41958	5.94537	3.05345	0.00341166	0.0383525	-2.15487
Ift74	2.47715	4.32865	3.05201	0.00342574	0.0384855	-2.04041
Zhx3	-1.37857	5.71502	-3.05135	0.00343224	0.0385078	-2.15627
BC002059	2.6646	2.84075	3.05155	0.00343028	0.0385078	-1.88068
Scn3b	1.11777	7.95717	3.04998	0.0034457	0.0386335	-2.18916
Phf21b	-4.87977	1.77351	-3.04875	0.00345783	0.0387441	-1.83454
Uhrf1bp1l	-1.78658	6.05368	-3.04755	0.00346975	0.0388521	-2.17605
Trim46	-1.22868	6.91734	-3.04671	0.00347811	0.0389202	-2.191
Lhx6	-1.95053	6.57497	-3.04646	0.00348058	0.0389223	-2.18835
Ccny	-1.07232	6.72261	-3.04612	0.00348401	0.0389352	-2.19042
Epb41l1	-1.00938	9.00933	-3.04585	0.0034867	0.0389397	-2.20341
Nipal3	-1.35171	5.9505	-3.04509	0.00349434	0.0389741	-2.17894
Mrps9	1.19588	4.66048	3.04524	0.0034928	0.0389741	-2.09736
Skida1	-1.93303	2.90325	-3.04473	0.00349784	0.0389877	-1.9202
1700040D17Rik	6.51842	-1.07848	3.0433	0.00351223	0.0391226	-2.49399
Rgs5	-3.68581	3.98557	-3.04237	0.00352154	0.0392007	-2.05552
Ptchd1	-1.63417	3.825	-3.04171	0.0035282	0.0392237	-2.02854
Zfp120	2.1845	4.57226	3.04187	0.0035266	0.0392237	-2.093
Grhl1	3.47114	1.15246	3.0405	0.00354042	0.039334	-1.8731
Selenon	-1.42759	4.26101	-3.03985	0.003547	0.0393814	-2.08232
Son	-1.11871	8.01883	-3.03866	0.00355917	0.0394908	-2.21944
Tusc2	0.964729	6.02088	3.03832	0.00356264	0.0395036	-2.19578
Nsmaf	1.15549	4.71978	3.03708	0.00357526	0.0396179	-2.12357
4930598N05Rik	-7.85632	-1.44013	-3.03616	0.00358463	0.039696	-2.41449
Rsl1d1	1.35586	6.60975	3.03537	0.00359273	0.0397553	-2.21598
Ablim2	-1.18709	5.56466	-3.03518	0.00359465	0.0397553	-2.19129
Lsg1	1.34675	4.08245	3.03342	0.00361281	0.0398272	-2.06904
Smyd5	-1.38161	5.88492	-3.03401	0.00360675	0.0398272	-2.2064
Ppp1r18	2.07912	4.43015	3.03345	0.00361254	0.0398272	-2.10037
Frmpd3	-2.5098	5.04761	-3.03349	0.00361207	0.0398272	-2.16846
Klhl25	2.08943	4.53572	3.03431	0.00360362	0.0398272	-2.10832
Axin2	-1.86419	3.54801	-3.0308	0.00363993	0.0400229	-2.02776
Neurl1a	-1.4644	5.85196	-3.03097	0.00363812	0.0400229	-2.21301
Polk	2.04864	3.81343	3.03114	0.00363642	0.0400229	-2.03969
Smim8	1.8916	4.15752	3.03104	0.00363741	0.0400229	-2.08014
Ppp6r2	-0.954343	6.30736	-3.0305	0.00364299	0.0400307	-2.22538
Plrg1	1.25783	6.01503	3.02982	0.00365005	0.0400568	-2.21832
Zfr2	-1.74354	5.98976	-3.03003	0.00364788	0.0400568	-2.22019
Mtrex	1.11057	6.29132	3.0291	0.00365766	0.0401144	-2.22735
Emc7	-1.05004	6.60747	-3.02866	0.00366217	0.0401381	-2.23442
Epb41l2	-1.64667	5.28636	-3.02532	0.00369726	0.0404967	-2.20292
Mtfr2	-8.86965	-2.17515	-3.0245	0.00370591	0.0405434	-2.70926
Kif21a	1.17107	7.14372	3.02446	0.00370627	0.0405434	-2.2499
Rpl35a	1.70785	6.69149	3.02403	0.00371086	0.0405677	-2.24618
Med13l	-1.78285	6.19569	-3.02329	0.00371874	0.0406278	-2.23928
Utp4	1.18339	4.46572	3.02203	0.00373205	0.0407471	-2.13876
Agbl3	2.52879	3.50733	3.02171	0.00373549	0.0407586	-2.02644
Lyplal1	-2.08817	2.62519	-3.02115	0.00374147	0.0407978	-1.95312
Chp1	1.18542	6.44348	3.01987	0.00375509	0.0408273	-2.25292
Frs2	-1.37387	5.55048	-3.01977	0.00375613	0.0408273	-2.23029
Dgat1	-1.51842	4.61799	-3.01981	0.00375573	0.0408273	-2.16866
Sec23b	-1.77602	5.66635	-3.0199	0.00375478	0.0408273	-2.23572
Hspa1a	-3.51805	1.96535	-3.01986	0.00375517	0.0408273	-1.91062
Casd1	-1.20519	6.04754	-3.01905	0.00376388	0.0408336	-2.24954
Tagln3	1.30765	7.0157	3.01917	0.0037626	0.0408336	-2.26229
Atp9a	-1.08325	9.26191	-3.01923	0.00376199	0.0408336	-2.27248
Rasa3	-1.32137	5.50005	-3.01875	0.00376712	0.0408428	-2.22979
Cyth1	1.13585	5.94888	3.01811	0.00377392	0.0408905	-2.2468
Tmc4	-2.67349	1.83693	-3.0173	0.00378268	0.0409594	-1.91014
Dvl3	-1.75618	5.88113	-3.01638	0.00379261	0.041041	-2.25056
Slc16a14	-1.95083	4.93607	-3.01581	0.00379878	0.0410557	-2.20294
Gm13889	-2.63602	3.92981	-3.01586	0.00379825	0.0410557	-2.11269
Slc35c1	1.20588	4.41323	3.0151	0.00380645	0.0411126	-2.15073
Ogdhl	-1.20496	6.77963	-3.01479	0.00380979	0.0411227	-2.27223
Ascl1	-2.77593	3.19829	-3.01349	0.00382386	0.0411704	-2.03226
Gpr176	-1.23137	4.46695	-3.01371	0.00382151	0.0411704	-2.1689
Smim45	1.40623	5.72935	3.01366	0.00382208	0.0411704	-2.24967
Gm10335	-8.88297	0.462667	-3.0139	0.00381944	0.0411704	-1.95926
Sf3b3	1.30792	6.62501	3.01326	0.00382636	0.0411713	-2.27322
Anxa2	3.25284	2.93451	3.01301	0.00382915	0.0411754	-1.98141
Tmem169	-1.46287	5.56761	-3.01166	0.00384386	0.0413076	-2.25193
Slc35b4	-1.1078	5.19501	-3.01066	0.00385483	0.0413902	-2.23447
Ibsp	-7.40352	-1.18129	-3.01051	0.0038564	0.0413902	-2.39497
Minar1	-3.09496	5.7122	-3.00996	0.00386251	0.0414298	-2.26411
Kyat1	1.4993	3.76983	3.00947	0.00386788	0.0414613	-2.09341
Gtf2f1	1.42264	5.76946	3.009	0.00387301	0.0414903	-2.26354
Trim17	-2.48164	2.71466	-3.00825	0.00388122	0.0415522	-1.99355
Gatd3a	1.25528	6.26323	3.00774	0.00388688	0.0415867	-2.28146
Rab3b	-1.40804	6.92364	-3.00698	0.00389531	0.0416317	-2.29377
Masp1	-1.69686	3.83437	-3.00692	0.00389596	0.0416317	-2.12121
Cers2	-1.51754	4.61768	-3.00658	0.00389974	0.041646	-2.2014
Rprd1b	-1.22985	4.88312	-3.00496	0.00391769	0.0417854	-2.22716
Ptrh2	1.63123	4.42239	3.00511	0.00391609	0.0417854	-2.17527
Lrrc3	-1.3627	5.9161	-3.00277	0.00394211	0.0419934	-2.28699
Kcnh7	-2.43206	6.43298	-3.00287	0.00394103	0.0419934	-2.29894
Nt5c	1.41349	4.84385	3.00213	0.00394927	0.0420435	-2.22228
Ufc1	1.11452	6.10253	3.00178	0.0039532	0.0420591	-2.29295
Rps6-ps1	13.6562	-3.12467	3.00071	0.0039653	0.0421616	-3.40916
Drc3	1.94595	2.82992	2.99961	0.00397767	0.0422668	-2.00689
Slc3a2	-1.84937	7.82423	-2.99885	0.00398619	0.0423047	-2.32139
Trim65	-2.5119	1.35855	-2.99897	0.00398492	0.0423047	-1.94532
Pclaf	-10.3963	-2.0091	-2.99768	0.00399949	0.0424189	-2.67525
0610012G03Rik	1.32372	5.41341	2.99746	0.00400192	0.0424189	-2.27596
Reep6	-1.95034	3.79743	-2.99655	0.00401226	0.042502	-2.1437
Hapln4	-2.73084	0.842832	-2.99579	0.00402095	0.0425197	-1.97553
Abcb1b	3.33721	0.686308	2.99531	0.00402637	0.0425197	-2.02289
Lss	-1.47893	6.74586	-2.99565	0.00402258	0.0425197	-2.32111
Notch3	-2.6159	2.49008	-2.99565	0.00402256	0.0425197	-2.00228
Sugct	6.34184	-0.703178	2.99545	0.00402481	0.0425197	-2.41745
Zfp324	-1.1126	4.64826	-2.99285	0.00405464	0.0427917	-2.23784
Ccdc50	-1.69945	7.67118	-2.99177	0.00406704	0.0428961	-2.33852
Cwc22	1.43706	4.26669	2.99149	0.00407022	0.0429004	-2.19439
Phgdh	-1.91266	4.66356	-2.99124	0.0040731	0.0429004	-2.24588
Rpl3	1.02834	8.41614	2.99108	0.00407499	0.0429004	-2.34342
Ybx1	1.37311	9.62622	2.99066	0.00407987	0.0429162	-2.34594
Grin2a	-2.16307	5.354	-2.99051	0.00408151	0.0429162	-2.29701
Trappc1	1.32648	5.58405	2.98987	0.00408899	0.0429684	-2.3043
Tsnax	1.13703	6.97011	2.98853	0.00410451	0.0431049	-2.34073
Snrpd3	1.08831	5.99635	2.98804	0.0041102	0.0431381	-2.32553
Fam163b	-1.396	6.63841	-2.98774	0.00411368	0.043139	-2.34013
Stx8	1.31934	4.38841	2.98738	0.00411786	0.043139	-2.21829
Sc5d	-1.27702	6.19559	-2.98739	0.00411774	0.043139	-2.33446
Wbp2nl	14.6515	-3.86936	2.98636	0.00412981	0.0432112	-3.63471
Pik3ip1	2.65852	4.03933	2.9864	0.00412927	0.0432112	-2.17171
Xylt2	-1.97906	5.4546	-2.98567	0.00413781	0.0432683	-2.31351
Stap1	-4.59149	-0.309856	-2.98543	0.00414065	0.0432716	-2.18189
Pcyt1b	-1.00503	7.25424	-2.98512	0.00414433	0.0432836	-2.3527
Bzw2	1.06948	7.4237	2.98415	0.00415571	0.0433758	-2.35582
Hspa1b	-4.4244	2.2912	-2.98381	0.00415962	0.0433902	-2.01866
Chn1	-0.914434	6.33268	-2.98223	0.0041783	0.0435583	-2.34987
Pura	-2.16554	4.54709	-2.98113	0.00419134	0.043641	-2.26113
1500015A07Rik	2.98595	1.15434	2.98126	0.0041898	0.043641	-2.0007
Zfta	1.10699	7.72581	2.98	0.00420465	0.043753	-2.36831
Zwint	-1.38115	9.96119	-2.97933	0.0042126	0.043809	-2.37428
Klhl12	0.973247	5.83488	2.97871	0.00422007	0.0438333	-2.34395
Pcsk9	-3.69235	0.857272	-2.97884	0.00421847	0.0438333	-2.00982
Dscaml1	-1.62969	5.66201	-2.9781	0.00422729	0.0438816	-2.34276
Dennd10	-1.48249	5.09991	-2.97753	0.00423417	0.0438996	-2.31284
Slco1c1	-3.47089	2.70893	-2.9777	0.00423213	0.0438996	-2.06907
Tmem39a	-1.7483	2.6564	-2.97688	0.00424191	0.0439532	-2.0646
Nrxn2	-1.47173	9.11002	-2.97663	0.00424487	0.0439572	-2.38185
Cyb5a	2.44625	6.06568	2.97626	0.00424929	0.0439763	-2.35609
Vash2	1.12423	5.50276	2.97592	0.0042534	0.0439922	-2.3361
Chsy1	1.46853	4.22248	2.97535	0.00426023	0.0440361	-2.22986
Ubqln4	-1.07385	6.94066	-2.97436	0.00427223	0.0441239	-2.37742
Smarce1	0.916237	6.51069	2.97422	0.00427389	0.0441239	-2.37207
Snrnp40	1.07517	5.03055	2.97354	0.00428204	0.0441813	-2.31187
Zfp68	1.35604	5.92479	2.97279	0.00429115	0.0442486	-2.3621
Ccdc88c	1.883	5.15546	2.97206	0.00430006	0.0443137	-2.31978
Ube2w	1.65193	6.71775	2.97134	0.00430874	0.0443763	-2.38157
Fgf9	-1.54936	3.86622	-2.97003	0.00432475	0.0445144	-2.21637
Gm24644	-11.6807	-4.36592	-2.96931	0.00433345	0.0445503	-3.48463
Peds1	1.01663	5.28691	2.96935	0.00433296	0.0445503	-2.34051
St8sia4	-2.97845	6.78136	-2.96874	0.00434047	0.0445955	-2.39103
Creld2	-1.94705	4.20999	-2.96741	0.00435674	0.0446882	-2.26369
Acadsb	-2.18374	6.11314	-2.96736	0.00435734	0.0446882	-2.3805
Tomm20	-0.964663	8.05966	-2.96742	0.00435661	0.0446882	-2.40275
Slc12a4	-2.62656	2.84808	-2.9665	0.00436791	0.0447462	-2.1103
Dnd1	-3.81253	0.379452	-2.96648	0.00436823	0.0447462	-2.08475
Gtf2a2	1.7897	5.07211	2.96454	0.00439211	0.0449369	-2.33532
Ggcx	-1.66768	3.77806	-2.96475	0.00438957	0.0449369	-2.22102
Gpr132	-8.37325	-1.57499	-2.96391	0.00439991	0.0449678	-2.57883
Tmem132b	-1.4134	6.64244	-2.96387	0.00440039	0.0449678	-2.40052
Mapkapk3	2.18374	2.08198	2.96212	0.00442216	0.0450989	-2.04267
Cyb5r4	1.6371	5.79064	2.96199	0.00442379	0.0450989	-2.38412
Pin4	2.42217	2.46076	2.96256	0.0044167	0.0450989	-2.06611
Gm16973	-2.24706	1.79144	-2.96239	0.00441879	0.0450989	-2.03717
Iglon5	-1.70066	6.31799	-2.96165	0.00442808	0.0451037	-2.40183
Atp5k	1.53006	6.66184	2.96153	0.00442954	0.0451037	-2.40608
Rnasel	1.58776	4.3541	2.96097	0.00443646	0.0451472	-2.27662
Specc1l	0.97411	6.26933	2.96002	0.00444838	0.0452416	-2.4037
Rab11fip3	-1.0347	6.48678	-2.9592	0.00445866	0.0453191	-2.41077
Txndc9	1.52686	5.93009	2.9588	0.00446367	0.0453431	-2.39737
Ctdspl2	1.65039	4.9997	2.95746	0.00448055	0.0454874	-2.34808
Ttc1	1.23211	5.49501	2.95706	0.00448555	0.0455111	-2.38383
Pcdhb16	-1.80103	3.75393	-2.95659	0.00449158	0.0455452	-2.23813
Acot11	-1.95824	1.94752	-2.95625	0.00449576	0.0455606	-2.05804
Ndufb10	0.938702	6.47175	2.95596	0.00449946	0.0455711	-2.41796
Gdap1l1	-0.981277	7.03617	-2.95558	0.00450428	0.0455928	-2.42622
Kcna6	-1.45128	6.61831	-2.95449	0.00451817	0.0456793	-2.42485
Paqr3	-1.50818	4.0176	-2.9546	0.00451666	0.0456793	-2.27229
Phf21a	-1.29135	5.58508	-2.95381	0.00452676	0.0457391	-2.40088
Cmbl	3.06382	1.13522	2.95333	0.00453287	0.0457737	-2.06601
Fig4	1.33703	5.54042	2.95288	0.00453856	0.0458041	-2.39622
Noc3l	1.20503	4.49147	2.95228	0.00454623	0.0458542	-2.31742
D2hgdh	-1.74399	3.30165	-2.95207	0.0045489	0.0458542	-2.1959
Jpt2	-1.51146	5.22515	-2.95082	0.00456495	0.0459346	-2.38533
Nkain4	-2.15562	2.48181	-2.95089	0.00456402	0.0459346	-2.11127
Myof	-3.60733	2.82756	-2.95109	0.00456154	0.0459346	-2.15047
Nid2	-4.0151	0.637858	-2.94995	0.00457618	0.0460205	-2.088
Psmd12	0.975843	6.45066	2.94943	0.00458285	0.0460329	-2.43403
Frem2	-2.53639	3.34542	-2.94922	0.0045855	0.0460329	-2.20551
Dock5	-3.92788	2.18682	-2.94951	0.00458185	0.0460329	-2.09449
Itpk1	0.944388	6.3385	2.94787	0.00460291	0.0461806	-2.43615
Hddc2	1.7958	4.14113	2.94703	0.00461374	0.0462207	-2.2903
Mef2d	-1.41895	7.06913	-2.94693	0.00461504	0.0462207	-2.44852
Ddb2	2.19638	2.74541	2.94731	0.00461015	0.0462207	-2.12862
Rpl4	1.08172	9.31282	2.9437	0.00465711	0.0466147	-2.46579
Zfp316	-0.955423	5.46135	-2.94331	0.00466221	0.0466385	-2.42096
Slco4a1	-4.29093	0.288519	-2.94259	0.0046716	0.046705	-2.14947
Actr10	1.0892	7.34895	2.94233	0.00467504	0.0467121	-2.46176
Qrfprl	-5.09249	0.336886	-2.94092	0.00469355	0.0468341	-2.14317
Pdk2	1.84873	4.61747	2.94077	0.00469548	0.0468341	-2.35447
Rassf4	-4.10225	1.01976	-2.94098	0.00469277	0.0468341	-2.08433
Neo1	-1.50605	7.87041	-2.94046	0.00469956	0.0468474	-2.47035
Sp4	-1.30874	5.37241	-2.93875	0.0047222	0.0470438	-2.42843
Ptprm	-1.63824	5.01226	-2.93846	0.00472606	0.0470438	-2.40511
Tmem18	-1.78035	5.65057	-2.93835	0.00472752	0.0470438	-2.44226
Plekhm3	-1.68119	5.00999	-2.93717	0.00474318	0.0471451	-2.40863
Gak	-1.41622	6.6805	-2.93716	0.00474322	0.0471451	-2.46915
Zscan18	-0.971325	4.97306	-2.93672	0.00474918	0.0471494	-2.4071
A930033H14Rik	-2.95012	1.16432	-2.93681	0.00474789	0.0471494	-2.08867
Pigw	2.00795	3.17739	2.93549	0.00476551	0.0472841	-2.20451
Ppp1r8	0.863445	6.06313	2.93513	0.00477035	0.0473046	-2.46231
Adnp2	-1.21962	5.26906	-2.93385	0.00478745	0.0474466	-2.43481
Mafk	1.56564	3.10296	2.93279	0.00480171	0.0475604	-2.20477
Tmem255a	-4.42061	4.51293	-2.93211	0.00481079	0.0476227	-2.38887
Tcte1	-4.00946	0.0048549	-2.92841	0.00486084	0.0480902	-2.23114
Shmt2	-2.26334	5.41611	-2.92791	0.00486767	0.0481299	-2.46
Ube2g1	1.42146	6.44221	2.92751	0.00487308	0.0481555	-2.48877
Fnip1	-1.40723	5.65277	-2.92663	0.00488513	0.0482466	-2.47277
Tmem201	-1.1752	5.86672	-2.9262	0.00489107	0.0482774	-2.48118
Eif5a	0.861678	8.70203	2.92395	0.00492182	0.0485529	-2.51504
Yipf2	-1.78267	3.18421	-2.92254	0.00494126	0.0487165	-2.25464
Serac1	-1.80632	4.40815	-2.91798	0.00500456	0.0493121	-2.40642
Ctbp1	-1.16423	7.70169	-2.91665	0.00502321	0.0494565	-2.52947
Mipol1	2.74514	1.21895	2.91652	0.00502501	0.0494565	-2.14009
Crkl	-1.47408	5.58569	-2.91512	0.00504471	0.0496218	-2.49901
Scmh1	1.14507	5.57395	2.91341	0.00506881	0.0498302	-2.49778
Pcdhb21	-2.19129	2.65035	-2.91277	0.00507787	0.0498905	-2.21933
Pcyt2	-1.23618	6.67247	-2.9115	0.00509587	0.0500098	-2.53399
Trmt5	1.59633	3.30695	2.9117	0.00509305	0.0500098	-2.28003
Tmem47	-2.67349	6.20701	-2.91028	0.00511322	0.0501151	-2.53104
Rnft2	-0.953618	7.13098	-2.91013	0.0051154	0.0501151	-2.54182
Cerk	-1.69399	5.85735	-2.91047	0.00511049	0.0501151	-2.51955
Ybey	1.71926	2.68007	2.90915	0.0051294	0.0502234	-2.21532
Snx27	-1.14118	7.2596	-2.90837	0.00514044	0.0503026	-2.54742
Taf11	1.17449	4.62079	2.90786	0.00514784	0.0503309	-2.44117
Dennd1a	-1.30513	5.57292	-2.90776	0.00514922	0.0503309	-2.51593
Srek1	-1.19343	5.42089	-2.90683	0.00516255	0.0504323	-2.51118
Atad5	1.90627	3.16065	2.90586	0.00517649	0.0505396	-2.27449
Ighg2c	-13.4654	-4.21163	-2.9056	0.00518028	0.0505477	-3.48235
Rps11	1.07245	6.8709	2.905	0.00518895	0.0506033	-2.55156
Pltp	-2.77521	1.54951	-2.90476	0.00519242	0.0506083	-2.16191
Bean1	-1.83512	3.94911	-2.90412	0.00520164	0.0506693	-2.39085
Sike1	-1.04947	6.85605	-2.90391	0.00520466	0.0506698	-2.55478
Ccnb1	-6.69475	-1.2984	-2.90305	0.00521723	0.0507632	-2.59959
Grpel2	1.00247	5.44309	2.90278	0.0052211	0.0507719	-2.51766
Gm10710	-6.09076	-0.551075	-2.90257	0.0052242	0.0507731	-2.39145
Susd2	-4.16198	0.486192	-2.90228	0.00522837	0.0507848	-2.21029
Ccdc92b	-1.0564	4.74165	-2.9018	0.00523544	0.0508246	-2.47456
Slc6a17	-2.094	9.29478	-2.90093	0.00524801	0.0509176	-2.57352
Capn5	-1.57877	6.40303	-2.90059	0.00525308	0.0509284	-2.55788
Arid4a	1.24657	4.8891	2.90045	0.00525509	0.0509284	-2.48336
Cct2	0.937202	7.85405	2.89931	0.00527168	0.0510024	-2.57355
Fam83h	-2.22729	2.96929	-2.89963	0.00526703	0.0510024	-2.28696
Pdzd7	-2.25505	3.3972	-2.89946	0.00526948	0.0510024	-2.33886
Rasal2	-1.41754	6.14364	-2.89907	0.00527525	0.051008	-2.55648
Spns1	-1.5341	5.91012	-2.89858	0.00528252	0.0510205	-2.55237
Plekhg5	-2.05956	4.16754	-2.89865	0.00528144	0.0510205	-2.43103
Tulp3	1.11835	3.84014	2.89658	0.00531191	0.0512754	-2.38421
Zdhhc2	-1.62155	7.59378	-2.89583	0.00532303	0.0513537	-2.58131
Mettl16	-1.42682	5.57338	-2.89462	0.0053409	0.0514289	-2.54904
Zbed4	2.02574	3.14282	2.89449	0.00534287	0.0514289	-2.29788
Elfn1	-2.36408	5.12392	-2.89452	0.00534234	0.0514289	-2.52552
Rapgef2	-1.09549	6.8708	-2.89461	0.00534101	0.0514289	-2.57833
Gdf7	-10.4439	-3.66196	-2.89427	0.00534616	0.0514315	-3.36419
Zfp773	2.04319	1.91146	2.89155	0.00538656	0.0517911	-2.19849
Sra1	0.970124	6.30894	2.89134	0.00538983	0.0517933	-2.5779
Sgsm2	-1.8289	6.72964	-2.89108	0.00539371	0.0518015	-2.58581
Aurka	2.79845	1.19836	2.88991	0.00541121	0.0519186	-2.19828
Scn1a	-1.79588	6.10084	-2.88986	0.00541199	0.0519186	-2.57903
Pld3	-1.77183	8.21218	-2.88909	0.00542352	0.0519831	-2.60136
Frrs1l	-1.65748	6.93549	-2.88887	0.0054269	0.0519831	-2.59322
Ms4a15	-8.6365	-1.01495	-2.8888	0.00542784	0.0519831	-2.52702
Phactr3	-1.49794	6.82454	-2.88779	0.00544311	0.0520903	-2.59417
Ppm1g	0.809315	6.86939	2.88766	0.00544514	0.0520903	-2.59491
Mbtps2	-1.20174	6.07097	-2.88741	0.00544892	0.0520973	-2.58359
Zfp358	-1.35102	4.97824	-2.88673	0.00545921	0.0521665	-2.53315
Krt33b	-10.373	-3.39707	-2.88646	0.00546324	0.0521758	-3.28523
Vezf1	-1.10745	4.9187	-2.88602	0.0054699	0.0522101	-2.52906
Atad1	1.49313	7.98987	2.88422	0.00549723	0.0524417	-2.61192
Zfp618	-1.73945	4.22874	-2.88356	0.00550739	0.0525093	-2.47233
Mrps35	1.18164	4.84812	2.88173	0.00553527	0.0527445	-2.52706
Sox2ot	1.45994	5.08406	2.88154	0.00553824	0.0527445	-2.54526
Col1a1	-4.82254	1.64337	-2.88092	0.00554776	0.0527763	-2.22128
Sec22b	-0.999294	6.17698	-2.88095	0.00554736	0.0527763	-2.60216
Ccdc77	1.72513	2.76064	2.8803	0.00555729	0.0528376	-2.29209
Eif1ad	1.07904	5.03857	2.87994	0.00556286	0.0528611	-2.54771
Crhbp	-3.11886	4.02969	-2.87919	0.00557441	0.0529414	-2.46776
St6galnac4	-1.23961	4.88372	-2.87876	0.00558109	0.0529753	-2.54482
Sox1	-1.96634	4.67542	-2.87787	0.00559486	0.0530766	-2.53069
Rere	-1.32255	6.5805	-2.87763	0.00559858	0.0530824	-2.61757
Chd1	0.928153	5.67802	2.8769	0.00560978	0.053159	-2.59441
Bet1l	1.13148	5.02851	2.87628	0.00561942	0.0531601	-2.55526
Slc12a6	-1.18456	5.71338	-2.87559	0.00563014	0.0531601	-2.6019
Rspo1	-3.87922	2.35074	-2.8755	0.00563168	0.0531601	-2.28503
Aff1	-3.0763	3.28914	-2.87587	0.00562578	0.0531601	-2.38573
Ece1	-1.17372	4.67627	-2.87559	0.00563017	0.0531601	-2.53415
Ano3	3.3431	2.20451	2.87614	0.00562169	0.0531601	-2.24579
Pcdha7	-1.80284	3.36745	-2.87574	0.0056278	0.0531601	-2.39053
Gon7	1.87138	2.79722	2.87463	0.00564517	0.053258	-2.30959
Pdcl	1.49192	5.51941	2.87401	0.00565489	0.0533033	-2.59117
Epha5	-1.19767	8.35959	-2.87392	0.00565622	0.0533033	-2.63961
Arx	-1.62354	5.95057	-2.87294	0.00567167	0.0534194	-2.61773
Asrgl1	1.55749	5.16424	2.87224	0.00568268	0.0534419	-2.57241
Sh3bgrl3	-1.28863	6.11053	-2.87182	0.00568917	0.0534419	-2.62182
Mad1l1	1.91053	3.59257	2.87179	0.0056897	0.0534419	-2.40929
Vat1	1.615	7.82011	2.87208	0.00568511	0.0534419	-2.64076
Snhg15	-2.35539	3.3663	-2.87248	0.0056788	0.0534419	-2.40238
Srm	-1.16372	6.29603	-2.87132	0.00569713	0.0534822	-2.6275
Abcc8	-1.4756	4.14595	-2.86995	0.00571865	0.0536547	-2.49465
4933405L10Rik	8.08838	-1.57875	2.86952	0.00572546	0.0536892	-2.93641
Prelid1	1.01917	7.21851	2.8689	0.00573532	0.0537521	-2.64494
Mir6236	5.1535	4.26514	2.8684	0.00574319	0.0537963	-2.48076
Mcm8	1.92952	3.7112	2.86777	0.0057533	0.0538615	-2.43444
Sord	1.69815	4.44851	2.86732	0.00576048	0.0538991	-2.51789
Cldn15	-6.91284	-1.77108	-2.86696	0.00576606	0.0539218	-2.80826
B630019K06Rik	-1.261	5.10926	-2.86635	0.00577586	0.0539839	-2.59198
Rrp36	1.45988	4.54069	2.86519	0.00579437	0.0541089	-2.53809
Micos10	1.25993	6.49414	2.86512	0.00579557	0.0541089	-2.64623
Ppp4c	1.08421	5.48894	2.86475	0.00580148	0.0541345	-2.61504
Saraf	-1.2171	8.02305	-2.86441	0.00580688	0.0541477	-2.66197
Pcdhb14	-1.39333	3.47021	-2.86426	0.00580924	0.0541477	-2.42982
Szrd1	-1.19884	5.67189	-2.86382	0.00581639	0.0541848	-2.62793
Nuak1	-1.99539	6.31177	-2.86354	0.00582086	0.0541968	-2.64898
Arsa	-1.13924	5.63347	-2.86278	0.005833	0.0542803	-2.63095
Atg9a	-1.34242	6.09099	-2.86231	0.00584059	0.0542918	-2.64725
Ankrd44	-1.52289	5.04527	-2.86233	0.00584038	0.0542918	-2.59865
Ndufs1	0.93121	7.18706	2.86144	0.00585464	0.0543632	-2.66329
Pitpnc1	-1.16754	6.97972	-2.86151	0.00585348	0.0543632	-2.66199
Tenm3	-1.98455	7.44437	-2.86065	0.00586749	0.0544528	-2.6681
Ccdc181	1.48793	4.20371	2.85794	0.00591136	0.0548302	-2.51805
Camk1g	-1.40187	5.83156	-2.85649	0.00593515	0.0549954	-2.65401
Tmem229b	0.777378	7.00874	2.85646	0.00593562	0.0549954	-2.67407
Olig1	-3.39343	2.67101	-2.85548	0.00595157	0.0551134	-2.36168
Banf1	1.03718	6.41112	2.85451	0.00596761	0.055202	-2.67119
Bmt2	-1.98389	6.06173	-2.85464	0.00596537	0.055202	-2.66588
Ttc39b	-2.05742	5.33502	-2.85383	0.00597884	0.055276	-2.63962
Mmp9	-2.74287	0.840558	-2.85187	0.00601107	0.0555092	-2.28797
Gtpbp1	-0.988805	5.96505	-2.85171	0.00601382	0.0555092	-2.6685
Utp14a	1.26015	4.04939	2.85187	0.00601119	0.0555092	-2.51835
Itpa	1.38351	6.29445	2.851	0.00602551	0.055587	-2.67699
Gm16630	6.70275	-1.36062	2.85057	0.00603267	0.055623	-2.87032
Vps26a	1.18465	5.55251	2.84981	0.00604523	0.0557087	-2.6546
Utrn	-2.26706	4.38713	-2.84873	0.00606323	0.0557243	-2.5751
Pcsk6	-1.99195	3.61328	-2.84884	0.00606144	0.0557243	-2.48527
Mboat7	-0.97021	6.98484	-2.84911	0.00605702	0.0557243	-2.69271
Tmie	4.54272	1.39431	2.84906	0.00605775	0.0557243	-2.28365
Cebpb	-4.4947	0.502531	-2.84919	0.00605563	0.0557243	-2.31021
Dgkz	-1.07261	7.4687	-2.84845	0.0060679	0.0557372	-2.69829
Map3k14	-2.05078	2.45186	-2.84823	0.00607171	0.0557422	-2.35113
Alg10b	-1.36192	6.35377	-2.84758	0.00608245	0.0558108	-2.68786
Ehd1	-1.02607	6.56721	-2.84734	0.00608644	0.0558175	-2.69217
Gna12	-2.71752	5.95094	-2.84622	0.00610525	0.0559598	-2.68111
Zfp719	-1.25995	4.89532	-2.84589	0.00611086	0.0559812	-2.62706
Acss2	-1.15055	5.38208	-2.84508	0.00612452	0.0560763	-2.6616
Mkrn2os	-4.65067	-0.82074	-2.84482	0.00612877	0.0560851	-2.5658
Psmb1	1.4721	7.50869	2.84382	0.00614565	0.0562095	-2.70929
Cep83	1.89493	4.94184	2.84284	0.00616229	0.0562809	-2.62742
Pisd	1.17252	4.23085	2.84273	0.00616421	0.0562809	-2.5612
Mreg	3.97422	0.485114	2.84258	0.00616664	0.0562809	-2.36752
Numbl	-1.63123	6.48691	-2.84315	0.0061571	0.0562809	-2.70147
Rint1	-1.18956	4.77645	-2.84226	0.00617214	0.056301	-2.62528
Ets1	-3.8644	0.64483	-2.84197	0.00617707	0.0563159	-2.32179
Epha10	-1.72998	5.74449	-2.84143	0.00618626	0.0563696	-2.68824
Sostdc1	3.54034	1.72917	2.84051	0.0062019	0.0564286	-2.30381
Gm13689	-8.89332	-2.87198	-2.84046	0.00620266	0.0564286	-3.17876
Gm2093	12.1558	-3.69479	2.84084	0.00619628	0.0564286	-3.66886
Mrpl47	1.84944	4.71143	2.83899	0.00622784	0.0566276	-2.61717
Nhp2	1.47355	5.20064	2.83851	0.00623604	0.0566719	-2.66013
Nkap	-1.54774	4.6785	-2.83756	0.00625223	0.0567888	-2.62861
Impdh2	1.08428	5.81264	2.83732	0.00625647	0.0567972	-2.69777
Rin1	2.2941	2.65074	2.83535	0.00629034	0.0570743	-2.38422
Myl12a	2.22334	2.465	2.83501	0.00629618	0.057097	-2.36722
Atxn1l	-1.39689	5.62788	-2.83478	0.00630011	0.0571023	-2.69917
Plxdc2	-1.61857	5.13725	-2.83433	0.00630793	0.0571428	-2.67439
Npc1l1	-5.40819	-0.191848	-2.83355	0.00632151	0.0571773	-2.43704
Psma4	1.61467	7.00625	2.83364	0.00631994	0.0571773	-2.73008
Dennd5a	-1.09367	7.32659	-2.83353	0.00632178	0.0571773	-2.73406
Mindy4	1.96437	3.12005	2.83271	0.00633603	0.0572758	-2.44341
Mtres1	1.11134	4.13018	2.8325	0.00633967	0.0572763	-2.57596
Ift122	1.27756	4.80666	2.83217	0.00634549	0.0572763	-2.64279
Mlycd	1.54972	4.95541	2.83213	0.00634614	0.0572763	-2.65644
Prdm9	4.07505	0.687877	2.83191	0.00634994	0.0572803	-2.36547
Ago2	-1.89565	7.85602	-2.83144	0.00635805	0.0572929	-2.74269
Krr1	0.993979	5.20215	2.83149	0.00635723	0.0572929	-2.67928
Dazap2	-1.15488	5.86697	-2.83114	0.00636333	0.0573102	-2.71708
Slc38a2	-1.56348	6.69005	-2.82998	0.00638357	0.0574	-2.73685
Cpne3	-2.09748	2.96535	-2.8298	0.00638674	0.0574	-2.45248
Mycl	2.91442	4.82128	2.83036	0.00637699	0.0574	-2.64013
Lancl3	-2.62315	3.81694	-2.82984	0.00638606	0.0574	-2.55936
Mmd	-1.45432	6.58981	-2.82919	0.00639748	0.0574599	-2.73711
Hspa4	-0.95263	8.57208	-2.82904	0.00640013	0.0574599	-2.75142
Gm14023	7.1646	-1.76135	2.82833	0.00641247	0.0575404	-3.04225
Dzip1	-1.00186	6.96137	-2.82696	0.00643659	0.0577265	-2.7471
Slc25a48	14.4227	-4.14521	2.82668	0.00644163	0.0577414	-3.777
Cln5	3.33935	2.77908	2.8256	0.0064607	0.0578212	-2.41479
Marchf6	1.23407	8.57908	2.82592	0.00645505	0.0578212	-2.75884
Sema3d	-2.80543	3.23648	-2.82577	0.00645762	0.0578212	-2.49693
Garem2	-2.49778	2.59939	-2.82518	0.00646814	0.0578575	-2.4223
Nme4	4.85682	1.20815	2.82437	0.00648241	0.0579548	-2.34253
Kctd4	4.04249	2.64034	2.82189	0.00652663	0.0583196	-2.40397
Swt1	2.18485	3.28088	2.82122	0.00653851	0.0583952	-2.49039
Zfp791	2.24451	2.66072	2.82011	0.00655855	0.0585435	-2.42265
Megf8	-1.72316	7.77911	-2.81972	0.00656546	0.0585746	-2.77116
Gpr162	-1.10033	7.51236	-2.81801	0.0065962	0.0588181	-2.77355
Tppp3	2.87985	5.0592	2.81735	0.00660812	0.0588407	-2.69505
Prps2	1.80141	4.52982	2.8173	0.00660907	0.0588407	-2.6481
Fam122b	-2.34563	1.50828	-2.81738	0.00660759	0.0588407	-2.35622
Dnajc12	1.88869	3.35354	2.81614	0.00663007	0.0589969	-2.51243
Otulinl	2.71583	2.57258	2.81588	0.00663474	0.0590077	-2.41884
Ggta1	2.91483	1.57516	2.81546	0.00664232	0.0590443	-2.35681
Setbp1	-1.321	6.52376	-2.8151	0.00664896	0.0590727	-2.77136
Wdr59	-1.15534	5.62537	-2.81482	0.00665399	0.0590866	-2.74839
Lgi2	-3.24025	9.3011	-2.81436	0.00666233	0.05913	-2.78813
Sdc1	-2.57886	3.55749	-2.81409	0.00666723	0.0591426	-2.55534
Fyco1	1.35207	4.5117	2.81298	0.0066875	0.0592917	-2.66278
Atrnl1	-1.58718	7.43326	-2.81226	0.00670069	0.0593778	-2.78717
Zfp787	-1.69335	3.63642	-2.81071	0.00672911	0.0595987	-2.58117
Tnr	-1.64731	7.20775	-2.81032	0.00673621	0.0595998	-2.7903
Dpagt1	-1.25483	4.40283	-2.81034	0.00673582	0.0595998	-2.66827
Acot13	1.75131	4.93397	2.80914	0.00675791	0.0596065	-2.70971
Traf4	1.23184	5.5625	2.80964	0.00674868	0.0596065	-2.75344
1810013L24Rik	-1.35445	6.00624	-2.80973	0.00674712	0.0596065	-2.77455
Gpx7	-2.41665	2.17101	-2.8094	0.00675318	0.0596065	-2.41671
Pop4	1.16273	5.96768	2.80915	0.00675779	0.0596065	-2.77217
Gm12522	5.32917	-0.54384	2.80914	0.00675788	0.0596065	-2.66577
Furin	1.42277	5.42577	2.80861	0.00676779	0.0596431	-2.74782
Tle6	4.01112	0.771314	2.80854	0.00676905	0.0596431	-2.40149
Septin10	3.8582	0.555472	2.80666	0.00680382	0.0599185	-2.42768
Plekhg1	-2.47124	3.29348	-2.80606	0.006815	0.059986	-2.54834
Prdm15	-1.06677	4.44166	-2.80533	0.00682864	0.0600442	-2.68388
Ubap1l	-4.44611	0.22207	-2.80533	0.00682854	0.0600442	-2.43183
Trmt1	-1.00162	5.86636	-2.80378	0.00685744	0.0602664	-2.78476
Igf2	-7.56736	-0.756781	-2.80342	0.0068642	0.0602948	-2.59965
Cenpq	2.16165	2.93562	2.80317	0.00686888	0.0603049	-2.49027
Osbp2	-1.41157	5.60179	-2.80255	0.00688052	0.060345	-2.77809
Pxylp1	-1.33031	4.39732	-2.80259	0.00687969	0.060345	-2.6822
Atf4	-1.67008	8.33519	-2.80129	0.00690407	0.0605205	-2.81881
Cbx5	-1.38077	8.38569	-2.80055	0.00691816	0.0605324	-2.82064
Plod2	1.7861	4.15726	2.8007	0.00691528	0.0605324	-2.64889
Pyurf	-1.67689	3.00059	-2.80047	0.00691961	0.0605324	-2.52557
Lacc1	-3.77463	0.272571	-2.80082	0.00691295	0.0605324	-2.43687
Clstn3	-1.16432	8.93986	-2.79896	0.00694815	0.0607006	-2.82579
Tars2	0.943005	4.97136	2.79904	0.00694659	0.0607006	-2.74092
Tyw3	1.80652	3.14986	2.79875	0.00695208	0.0607006	-2.52912
Fam171b	-1.7126	8.43565	-2.7987	0.00695305	0.0607006	-2.82546
Shc3	-2.26448	5.49984	-2.79793	0.00696753	0.0607648	-2.7855
Reln	-2.46686	9.84455	-2.79804	0.00696544	0.0607648	-2.82756
Cc2d1a	-1.57286	6.2487	-2.79771	0.00697178	0.0607709	-2.80954
Foxk2	-0.862341	7.81115	-2.79724	0.00698063	0.060817	-2.82615
Nap1l5	-2.32576	7.2288	-2.79666	0.0069918	0.0608832	-2.8239
Ttll7	-1.55012	6.83652	-2.7964	0.0069966	0.060894	-2.82083
Psmc1	0.952305	7.20251	2.79619	0.00700063	0.060898	-2.82393
Nup88	0.75222	6.31374	2.79525	0.00701863	0.0610235	-2.81526
Aars	-1.20162	8.51444	-2.79487	0.00702586	0.0610488	-2.83502
Man1c1	-1.4289	3.52183	-2.79472	0.00702869	0.0610488	-2.60335
Tmem43	-1.12602	5.84545	-2.79418	0.00703913	0.0610553	-2.80786
Mtap	1.38228	3.55302	2.79412	0.00704017	0.0610553	-2.59298
1700101I11Rik	3.66177	1.3022	2.79442	0.00703447	0.0610553	-2.40158
Grin3b	-9.39087	-2.57393	-2.79383	0.00704584	0.0610735	-3.1312
Kcnj11	-1.47627	3.99393	-2.79362	0.00704972	0.0610762	-2.66351
Nt5dc2	-3.01293	1.84827	-2.79333	0.00705531	0.0610935	-2.42327
Pop1	1.16782	3.99536	2.79191	0.00708271	0.0612997	-2.65631
0610009L18Rik	3.74125	0.744142	2.79123	0.00709572	0.0613812	-2.43902
Mal2	-1.41585	6.03309	-2.79014	0.00711676	0.061532	-2.82267
Ckap2l	-3.56709	0.68857	-2.78615	0.00719438	0.0621717	-2.43065
Hsf1	-1.55317	4.47905	-2.78531	0.00721084	0.0622824	-2.73862
Pde12	-1.05676	4.92301	-2.78483	0.00722014	0.0622997	-2.77726
Phf13	-1.3924	4.84179	-2.78498	0.00721729	0.0622997	-2.77169
Slc45a1	-1.87887	5.85812	-2.78462	0.00722426	0.0623038	-2.83172
Kdelr3	-3.79047	1.43454	-2.78427	0.0072312	0.0623321	-2.42786
Mmut	1.22523	4.95061	2.78284	0.00725923	0.0625422	-2.77727
Tbl1x	-0.827625	6.62331	-2.78253	0.00726537	0.0625635	-2.85184
Gtse1	3.18012	1.15816	2.78211	0.00727364	0.0626031	-2.43072
Gm19410	-3.18481	4.30556	-2.78171	0.00728149	0.0626392	-2.73302
Naf1	-1.54554	3.83715	-2.78068	0.007302	0.0626816	-2.67646
Chid1	-0.930424	6.32916	-2.78105	0.00729452	0.0626816	-2.85113
Arl10	-1.65017	5.30442	-2.78053	0.00730481	0.0626816	-2.8156
Sf3a3	1.03696	5.03943	2.78059	0.00730368	0.0626816	-2.79059
Glis1	-5.81759	-1.24457	-2.78048	0.00730589	0.0626816	-2.77527
Icmt	-1.51922	5.6271	-2.78035	0.00730845	0.0626816	-2.83257
Npdc1	-1.20241	7.83118	-2.7793	0.00732925	0.0627969	-2.87003
Mrps15	1.14757	4.95955	2.7793	0.0073292	0.0627969	-2.78733
Nit2	2.0347	4.24217	2.77862	0.00734285	0.0628504	-2.71192
3110040N11Rik	1.5654	4.02651	2.77862	0.00734274	0.0628504	-2.69043
Mvk	-1.29239	5.62036	-2.77836	0.00734795	0.0628625	-2.83683
Snrnp27	1.69286	5.17743	2.77779	0.0073593	0.0629281	-2.80615
Ncstn	-1.00169	6.35648	-2.7771	0.00737307	0.0629305	-2.86117
Atn1	-1.96551	3.01426	-2.77704	0.00737432	0.0629305	-2.58264
[truncated: 15,077 more rows]

## Sheet: Upregulated_GO_complete
	query	significant	p_value	term_size	query_size	intersection_size	precision	recall	term_id	source	term_name	effective_domain_size	source_order	parents	evidence_codes	intersection	highlighted	nlog10_pval
1	query_1	TRUE	0.0343477	153	566	23	0.040636	0.150327	GO:0002181	GO:BP	cytoplasmic translation	12069	729	GO:0006412	NAS,IBA IEA,IBA,NAS,IBA,ISS ISO NAS,IBA,ISO IEA,IBA NAS,NAS,IBA IEA,IEA,IEA,ISO IEA,ISO IBA IEA,ISS ISO IBA NAS IEA,NAS,NAS,NAS,IBA NAS,NAS,ISO IEA,NAS	Rpl14,Eif2b3,Drg2,Ncbp2,Drg1,Rps6,Rpl22,Dhx29,Rpl9,Rpl27,Eif3m,Eif3f,Eif3b,Paip1,Denr,Rpl6,Rps20,Rpl7,Rps10,Rpl35a,Rpl3,Ybx1,Rpl4	TRUE	3.37122
2	query_1	TRUE	2.25452e-05	795	568	77	0.135563	0.0968553	GO:0140535	GO:CC	intracellular protein-containing complex	12191	3507	GO:0032991	IEA,ISO IBA,EXP ISS ISO IBA IEA,ISS ISO IEA,ISS ISO IBA IEA,ISS IBA,IBA,IDA ISO IBA IEA,IBA,IDA,IDA ISS ISO IBA IEA,IDA ISO IBA IEA,ISS ISO IBA IEA,IDA ISS ISO IBA NAS IEA,ISS ISO IEA,IBA,ISO IBA IEA,ISS ISO IBA IEA,ISS ISO IBA IEA,ISO IEA,IDA ISS ISO IBA IEA,ISS ISO,ISS ISO IBA IEA,IDA ISO IBA IEA,ISS ISO IEA,IDA ISO IBA IEA,IEA,ISS ISO IBA IEA,IDA ISS ISO IEA,IDA ISO IBA IEA,ISO IEA,IDA ISO IBA…	Pole3,Polr3g,Cul4a,Lztr1,Cnot8,Kctd10,Rnf144a,Psmc3,Eif2b3,Prickle1,Psmb2,Cct5,Mad2l2,Sgf29,Klhl21,Eif4e3,Gtf2e1,Anapc7,Prkag2,Med18,Psma1,Commd1,Ncbp2,Cct7,Dnajc9,Psmd4,Cct6a,Anapc15,Skp1,Mlst8,C9orf72,Psmc6,Ctnnb1,Klhl2,Rnf7,Med6,Rnf19a,Bloc1s5,Gtf2h3,Tcp1,Ube2d1,Taf5,Prim1,Wdr77,Washc4,Psmd2,Ruvbl1,Psmc4,Prkag1,Rpp38,Ubac1,Gid8,Ppp3ca,Trappc4,Psmd13,Ing5,Psmc2,Rtcb,Psmd11,Xrcc4,Gtf2e2,Psmb7,Ps…	TRUE	10.7
3	query_1	TRUE	0.000964548	1407	568	110	0.193662	0.0781805	GO:1902494	GO:CC	catalytic complex	12191	3601	GO:0032991	ISS ISO IBA IEA,IEA,ISO IBA,ISO IBA IEA,IBA,EXP ISS ISO IBA IEA,IEA,ISS ISO IEA,ISS ISO IEA,IDA ISO NAS IEA,ISS IBA,ISO IBA IEA,IDA ISO IBA IEA,IBA,IDA ISO IBA NAS IEA,IEA,IDA ISO IBA IEA,IDA,IDA ISS ISO IBA IEA,IDA IPI ISO IBA IEA,IBA NAS,ISS ISO IBA IEA,ISS ISO IBA IEA,IDA ISS ISO IBA NAS IEA,ISS ISO IEA,IEA,ISO IEA,ISO IBA,ISO IBA NAS IEA,ISO IBA IEA,ISS ISO IBA IEA,ISS ISO IBA IEA,ISS ISO IBA…	Sae1,Pole3,Polr3g,Dync1li2,Ccng2,Cul4a,Clns1a,Mccc1,Lztr1,Bcl7a,Kctd10,Lsm2,Pik3r4,Rnf144a,Smarcd1,Dnal4,Psmc3,Prickle1,Psmb2,Cdk4,Dpf2,Sec11a,Mad2l2,Sgf29,Klhl21,Gmpr,Pidd1,Frg1,Smarcd2,Gtf2e1,Anapc7,Pigc,Prkag2,Med18,Exosc9,Ascc1,Psma1,Commd1,Mtf2,Gnai3,Psmd4,Anapc15,Nat10,Skp1,Rbbp4,C9orf72,Psmc6,Ctnnb1,Exosc2,Klhl2,Osgep,Rnf7,Carhsp1,Med6,Rnf19a,Gtf2h3,Hdac2,Ube2d1,Rbbp5,Taf5,Dld,Prim1,Wdr77,…	FALSE	6.94385
4	query_1	TRUE	0.00267239	85	568	18	0.0316901	0.211765	GO:1905369	GO:CC	endopeptidase complex	12191	3688	GO:1905368	IDA ISO IBA IEA,IDA,IDA ISS ISO IBA IEA,ISS ISO IBA IEA,ISO IEA,IDA ISS ISO IBA IEA,IDA ISO IBA IEA,IDA ISO IBA IEA,IDA ISO IBA IEA,IDA ISO IBA IEA,IDA ISO IBA IEA,IDA ISO IBA IEA,IGI IBA IEA,IDA ISO IBA IEA,IDA ISS ISO IBA IEA,IDA ISS ISO IBA IEA,IDA ISS ISO IBA IEA,IDA ISO IBA IEA	Psmc3,Prickle1,Psmb2,Sec11a,Pidd1,Psma1,Psmd4,Psmc6,Psmd2,Psmc4,Psmd13,Psmc2,Immp2l,Psmd11,Psmb7,Psma6,Psma2,Psmd12	FALSE	5.92478
5	query_1	TRUE	0.00334188	60	568	15	0.0264085	0.25	GO:0000502	GO:CC	proteasome complex	12191	81	c(\GO:0140535\", \"GO:1905369\")"	IDA ISO IBA IEA,IDA,IDA ISS ISO IBA IEA,IDA ISS ISO IBA IEA,IDA ISO IBA IEA,IDA ISO IBA IEA,IDA ISO IBA IEA,IDA ISO IBA IEA,IDA ISO IBA IEA,IDA ISO IBA IEA,IDA ISO IBA IEA,IDA ISS ISO IBA IEA,IDA ISS ISO IBA IEA,IDA ISS ISO IBA IEA,IDA ISO IBA IEA	Psmc3,Prickle1,Psmb2,Psma1,Psmd4,Psmc6,Psmd2,Psmc4,Psmd13,Psmc2,Psmd11,Psmb7,Psma6,Psma2,Psmd12	FALSE	5.70122
6	query_1	TRUE	0.00841343	111	568	20	0.0352113	0.18018	GO:1905368	GO:CC	peptidase complex	12191	3687	GO:1902494	IDA ISO IBA IEA,IDA,IDA ISS ISO IBA IEA,ISS ISO IBA IEA,IBA NAS IEA,ISO IEA,IDA ISS ISO IBA IEA,IDA ISO IBA IEA,IDA ISO IBA IEA,IDA ISO IBA IEA,IDA ISO IBA IEA,IDA ISO IBA IEA,IDA ISO IBA IEA,IGI IBA IEA,IDA ISO IBA IEA,IDA ISS ISO IBA IEA,IDA ISS ISO IBA IEA,IDA ISS ISO IBA IEA,NAS,IDA ISO IBA IEA	Psmc3,Prickle1,Psmb2,Sec11a,Sgf29,Pidd1,Psma1,Psmd4,Psmc6,Psmd2,Psmc4,Psmd13,Psmc2,Immp2l,Psmd11,Psmb7,Psma6,Psma2,Sf3b3,Psmd12	FALSE	4.77793
7	query_1	TRUE	0.0140126	22	568	9	0.0158451	0.409091	GO:0005838	GO:CC	proteasome regulatory particle	12191	375	c(\GO:0022624\", \"GO:0032991\")"	IBA,IBA IEA,IBA,IDA IBA IEA,IBA,IDA IBA,IBA,IDA IBA,IDA IBA	Psmc3,Psmd4,Psmc6,Psmd2,Psmc4,Psmd13,Psmc2,Psmd11,Psmd12	FALSE	4.2678
8	query_1	TRUE	0.0163854	655	568	60	0.105634	0.0916031	GO:1990904	GO:CC	ribonucleoprotein complex	12191	4007	GO:0032991	IBA IEA,IBA,IDA IPI ISO IBA IEA,ISS ISO IEA,ISS ISO IBA IEA,IEA,ISS ISO NAS IEA,IBA,ISS ISO NAS IEA,ISS ISO IEA,ISO IBA IEA,ISS ISO IBA NAS IEA,ISS ISO IBA IEA,ISS ISO IBA IEA,ISS ISO IEA,IDA ISS ISO IBA IEA,ISS ISO IEA,ISS ISO IBA IEA,ISS ISO IEA,IDA ISS ISO NAS IEA,IDA ISO IEA,ISS ISO IEA,IDA IPI ISO IBA IEA,ISS ISO IBA NAS IEA,NAS IEA,ISS ISO NAS IEA,IEA,IDA IPI ISS ISO IBA IEA,IEA,IDA,ISS ISO…	Rpl7l1,G3bp1,Rpl14,Larp7,Lsm2,Gemin2,Mrpl45,Nop9,Mrpl40,Ilf2,Frg1,Mrps16,Zmat2,Ctnnbl1,Snip1,Wbp4,Nat10,Smu1,Sart3,Rps6,Rpl22,Dhx29,Rpl9,Mrpl49,Ptcd3,Mrpl9,Cript,Rpl27,Eif3m,Ruvbl1,Bcas2,Rbm17,Tdrd7,Eif3f,Snrpe,Rpp38,Eif3b,Htatsf1,Rpl6,Rps20,Rpl7,Rpf1,Gpkow,Rps10,Mrps23,Mrps9,Rsl1d1,Plrg1,Mtrex,Rpl35a,Utp4,Sf3b3,Cwc22,Rpl3,Ybx1,Snrpd3,Snrnp40,Pin4,Rpl4,Ppp1r8	FALSE	4.11136
9	query_1	TRUE	0.000962845	982	560	84	0.15	0.0855397	GO:0003723	GO:MF	RNA binding	12095	343	GO:0003676	ISS ISO IBA IEA,IBA,IDA IEA,IDA IBA IEA,ISO IEA,IDA IEA,IEA,IEA,IBA IEA,IBA IEA,IMP ISS ISO IBA IEA,ISS ISO IEA,IBA IEA,IBA IEA,IDA IEA,ISO IEA,IEA,IBA IEA,IEA,IBA IEA,ISS ISO IBA IEA,ISO IEA,IEA,IEA,IBA,ISO IBA IEA,ISO IBA IEA,ISO IEA,IEA,ISS ISO IBA IEA,IEA,IBA,IBA,ISS ISO IBA IEA,IEA,IBA,IEA,ISS ISO IEA,ISO,ISO IEA,IBA IEA,IEA,IBA,IBA,IEA,IEA,IBA IEA,ISS ISO IBA IEA,ISS ISO IBA IEA,IDA,IEA,ISS…	Nudt16l1,Rpl7l1,Ybx3,G3bp1,Mex3a,Nudt5,Cnot8,Eif5a2,Rpl14,Nsun2,Larp7,Dhfr,Ptbp3,Lsm2,Nudt1,Cct5,Dtd2,Nop9,Caprin2,Eif4e3,Ilf2,Drg2,Frg1,Pus7l,Coil,Ddx25,Aptx,Exosc9,Ascc1,Ncbp2,Ddx10,Snip1,Wbp4,Dcps,Pus7,Nat10,Dtd1,Sart3,Rps6,Stat3,Rpl22,Ppil4,Dhx29,Hars2,Upf2,Rpl9,Exosc2,Ptcd3,Carhsp1,Cdh2,Rbm17,Tdrd7,Snrpe,Rpp38,Eef1a1,Eif3b,Htatsf1,Paip1,Denr,Rpl6,Rps20,Rpl7,Pus10,Khdrbs3,Rpf1,Psma6,Gpkow,Rps…	TRUE	6.94562

## Sheet: Downregulated_GO_complete
	query	significant	p_value	term_size	query_size	intersection_size	precision	recall	term_id	source	term_name	effective_domain_size	source_order	parents	evidence_codes	intersection	highlighted	nlog10_pval
1	query_1	TRUE	3.08523e-14	643	976	120	0.122951	0.186625	GO:0099537	GO:BP	trans-synaptic signaling	12069	19116	GO:0099536	IDA IMP IBA,ISO IEA,IDA IMP ISO IEA,IMP IBA,IDA IMP IEP ISO IBA IEA,IMP,IDA IMP ISO IBA IEA,ISO IEA,IDA IMP ISO IBA,IMP,IDA IMP,IMP,IDA IMP,IDA IMP,IDA IMP TAS IEA,IMP,IGI IBA,IDA,IMP,IMP,IMP,IDA IMP IGI IBA,IDA IBA IC,IMP IGI IBA IEA,ISO,IDA IMP ISO,IMP,IDA IMP ISO IBA,IMP,IMP,IDA IMP IEA,ISO IEA,IDA IMP IGI TAS NAS,IMP,IBA,IMP ISO IBA IEA,IBA,IDA IMP ISO IBA IEA,IDA IMP ISO,IEA,IMP,IDA IMP,IDA …	Grin3a,Abat,Cnr1,Shisa6,Syt1,Hras,Chrna4,Egfr,Ntrk2,Tmod2,Adcy1,Cntnap2,Syt9,Igf1,Sv2a,Chrd,Lin7c,Gpr158,Slc38a1,Sqstm1,Braf,Rph3a,Shisa9,Syn2,Trim9,Wnt5a,Slc4a8,Cplx1,Kif1b,Kcnc4,P2rx3,Slc6a1,Nrxn1,Slc7a11,Cacng5,Cacna1b,Htr5a,Dagla,Ngfr,Map1b,Gjd2,Cdh11,Erc2,Lrrc4,Hdac6,Syn3,Lynx1,Sorcs3,Nf1,Cpeb3,Clcn3,Mctp1,Pnoc,Kit,Gabrg3,Pde4a,Lrrtm2,Map1a,Slc12a5,Npr2,Ube3a,Psen1,Mapk9,Fgf12,Ace,Slc6a9,Slc…	TRUE	31.1096
2	query_1	TRUE	4.05121e-14	637	976	119	0.121926	0.186813	GO:0098916	GO:BP	anterograde trans-synaptic signaling	12069	18949	GO:0099537	IDA IMP IBA,ISO IEA,IMP ISO IEA,IMP IBA,IDA IMP IEP ISO IBA IEA,IMP,IDA IMP ISO IBA IEA,ISO IEA,IDA IMP ISO IBA,IMP,IDA IMP,IMP,IDA IMP,IDA IMP,IDA IMP TAS IEA,IMP,IGI IBA,IDA,IMP,IMP,IMP,IDA IMP IGI IBA,IDA IBA IC,IMP IGI IBA IEA,ISO,IDA IMP ISO,IMP,IDA IMP ISO IBA,IMP,IMP,IDA IMP IEA,ISO IEA,IDA IMP IGI TAS NAS,IMP,IBA,IMP ISO IBA IEA,IBA,IDA IMP ISO,IEA,IMP,IDA IMP,IDA IMP IBA,IDA IMP IBA,IEA,…	Grin3a,Abat,Cnr1,Shisa6,Syt1,Hras,Chrna4,Egfr,Ntrk2,Tmod2,Adcy1,Cntnap2,Syt9,Igf1,Sv2a,Chrd,Lin7c,Gpr158,Slc38a1,Sqstm1,Braf,Rph3a,Shisa9,Syn2,Trim9,Wnt5a,Slc4a8,Cplx1,Kif1b,Kcnc4,P2rx3,Slc6a1,Nrxn1,Slc7a11,Cacng5,Cacna1b,Htr5a,Ngfr,Map1b,Gjd2,Cdh11,Erc2,Lrrc4,Hdac6,Syn3,Lynx1,Sorcs3,Nf1,Cpeb3,Clcn3,Mctp1,Pnoc,Kit,Gabrg3,Pde4a,Lrrtm2,Map1a,Slc12a5,Npr2,Ube3a,Psen1,Mapk9,Fgf12,Ace,Slc6a9,Slc24a2,G…	FALSE	30.8372
3	query_1	TRUE	4.05121e-14	637	976	119	0.121926	0.186813	GO:0007268	GO:BP	chemical synaptic transmission	12069	2796	GO:0098916	IDA IMP IBA,ISO IEA,IMP ISO IEA,IMP IBA,IDA IMP IEP ISO IBA IEA,IMP,IDA IMP ISO IBA IEA,ISO IEA,IDA IMP ISO IBA,IMP,IDA IMP,IMP,IDA IMP,IDA IMP,IDA IMP TAS IEA,IMP,IGI IBA,IDA,IMP,IMP,IMP,IDA IMP IGI IBA,IDA IBA IC,IMP IGI IBA IEA,ISO,IDA IMP ISO,IMP,IDA IMP ISO IBA,IMP,IMP,IDA IMP IEA,ISO IEA,IDA IMP IGI TAS NAS,IMP,IBA,IMP ISO IBA IEA,IBA,IDA IMP ISO,IEA,IMP,IDA IMP,IDA IMP IBA,IDA IMP IBA,IEA,…	Grin3a,Abat,Cnr1,Shisa6,Syt1,Hras,Chrna4,Egfr,Ntrk2,Tmod2,Adcy1,Cntnap2,Syt9,Igf1,Sv2a,Chrd,Lin7c,Gpr158,Slc38a1,Sqstm1,Braf,Rph3a,Shisa9,Syn2,Trim9,Wnt5a,Slc4a8,Cplx1,Kif1b,Kcnc4,P2rx3,Slc6a1,Nrxn1,Slc7a11,Cacng5,Cacna1b,Htr5a,Ngfr,Map1b,Gjd2,Cdh11,Erc2,Lrrc4,Hdac6,Syn3,Lynx1,Sorcs3,Nf1,Cpeb3,Clcn3,Mctp1,Pnoc,Kit,Gabrg3,Pde4a,Lrrtm2,Map1a,Slc12a5,Npr2,Ube3a,Psen1,Mapk9,Fgf12,Ace,Slc6a9,Slc24a2,G…	FALSE	30.8372
4	query_1	TRUE	4.85278e-14	671	976	123	0.126025	0.183308	GO:0099536	GO:BP	synaptic signaling	12069	19115	GO:0007267	IDA IMP IBA,ISO IEA,IDA IMP ISO IEA,IMP IBA,IDA IMP IEP ISO IBA IEA,IMP,IDA IMP ISO IBA IEA,ISO IEA,IDA IMP ISO IBA,IMP,IDA IMP,IMP,IDA IMP,IDA IMP,IDA IMP TAS IEA,IMP,ISS ISO,IGI IBA,IDA,IMP,IMP,IMP,IDA IMP IGI IBA,IDA IBA IC,IMP IGI IBA IEA,ISO,IDA IMP ISO,IMP,IDA IMP ISO IBA,IMP,IMP,IDA IMP IEA,ISO IEA,IDA IMP IGI TAS NAS,IMP,IBA,IMP ISO IBA IEA,IBA,IDA IMP ISO IBA IEA,IDA IMP ISO,IEA,IMP,IDA …	Grin3a,Abat,Cnr1,Shisa6,Syt1,Hras,Chrna4,Egfr,Ntrk2,Tmod2,Adcy1,Cntnap2,Syt9,Igf1,Sv2a,Chrd,Rgs8,Lin7c,Gpr158,Slc38a1,Sqstm1,Braf,Rph3a,Shisa9,Syn2,Trim9,Wnt5a,Slc4a8,Cplx1,Kif1b,Kcnc4,P2rx3,Slc6a1,Nrxn1,Slc7a11,Cacng5,Cacna1b,Htr5a,Dagla,Ngfr,Map1b,Gjd2,Cdh11,Erc2,Lrrc4,Hdac6,Syn3,Lynx1,Sorcs3,Nf1,Cpeb3,Clcn3,Mctp1,Pnoc,Kit,Gabrg3,Pde4a,Lrrtm2,Map1a,Slc12a5,Npr2,Ube3a,Psen1,Mapk9,Fgf12,Ace,Slc6a…	FALSE	30.6566
5	query_1	TRUE	1.65609e-12	925	976	149	0.152664	0.161081	GO:0007267	GO:BP	cell-cell signaling	12069	2795	c(\GO:0007154\", \"GO:0023052\")"	IEP ISO IEA,IDA IMP IBA,ISO IEA,IDA IMP ISO IEA,IMP IBA,IBA,IDA IMP IEP ISO IBA IEA,IBA,IMP,IDA IMP ISO IBA IEA,ISO IEA,IDA IMP ISO IBA,IMP,IDA IMP,IMP,IDA IMP ISO IBA,IDA IMP,IDA IMP TAS IEA,IMP,ISS ISO,IGI IBA,IMP,IDA,IMP,IMP,IMP,IDA IMP IGI IBA,IDA IBA IC,IMP IGI IBA IEA,ISO,IDA IMP ISO TAS,IMP,IDA IMP ISO IBA,ISS IEA,IMP,IMP,IMP,IDA IMP IEA,ISO IEA,IDA IMP IGI TAS NAS,IMP,IBA,IMP ISO IBA IEA,…	Sfrp1,Grin3a,Abat,Cnr1,Shisa6,Syt13,Syt1,Syt17,Hras,Chrna4,Egfr,Ntrk2,Tmod2,Adcy1,Cntnap2,Syt9,Igf1,Sv2a,Chrd,Rgs8,Lin7c,Clock,Gpr158,Slc38a1,Sqstm1,Braf,Rph3a,Shisa9,Syn2,Trim9,Wnt5a,Slc4a8,Cplx1,Tunar,Kif1b,Kcnc4,Kcna2,P2rx3,Slc6a1,Nrxn1,Slc7a11,Cacng5,Cacna1b,Pck2,Htr5a,Dagla,Gnao1,Nppc,Ngfr,Map1b,Gjd2,Cdh11,Erc2,Lrrc4,Hdac6,Syn3,Lynx1,Sorcs3,Nf1,Cpeb3,Clcn3,Mctp1,Pnoc,Kit,Fzd4,Pde8b,Gabrg3,Pd…	FALSE	27.1266
6	query_1	TRUE	6.67217e-08	483	976	86	0.0881148	0.178054	GO:0050804	GO:BP	modulation of chemical synaptic transmission	12069	13270	c(\GO:0007268\", \"GO:0099177\")"	IDA IMP IBA,IMP ISO IEA,IBA,IMP ISO IEA,IMP,IDA IMP,ISO IEA,IDA IMP ISO IBA,IDA IMP,IMP,IDA IMP,IMP,IDA,IMP,IMP,IMP,IDA IBA IC,IDA IMP ISO,IMP,IBA,IMP,IDA IMP,ISO IEA,IDA IMP NAS,IMP,IBA,ISO IEA,IDA IMP ISO,IEA,IDA IMP,IBA,IDA IMP IBA,IEA,IDA IMP IEP,IMP IGI,IMP,IBA,ISO IEA,ISO,IGI,IMP,IDA IMP,IMP IGI TAS,IDA IMP,IDA,IMP,IMP IBA,ISO IBA NAS IEA,IDA IMP,IMP,ISO IEA,IDA IMP,IDA IMP IEP,IMP,IMP IBA,…	Grin3a,Cnr1,Shisa6,Syt1,Hras,Chrna4,Egfr,Ntrk2,Adcy1,Cntnap2,Igf1,Chrd,Gpr158,Slc38a1,Sqstm1,Braf,Shisa9,Wnt5a,Slc4a8,Cplx1,Kcnc4,P2rx3,Slc6a1,Nrxn1,Slc7a11,Cacng5,Cacna1b,Ngfr,Map1b,Cdh11,Erc2,Lrrc4,Hdac6,Sorcs3,Nf1,Cpeb3,Mctp1,Kit,Pde4a,Lrrtm2,Map1a,Ube3a,Psen1,Mapk9,Ace,Slc6a9,Slc24a2,Grin2d,Sv2c,Pcdh17,Gnai2,Plcb4,Iqsec1,Plppr4,Shisa7,Slc4a10,Tmem108,Chrna7,Pclo,Nlgn3,Myo5a,Flot1,Cacng2,Ptpn5…	FALSE	16.5227
7	query_1	TRUE	7.50229e-08	484	976	86	0.0881148	0.177686	GO:0099177	GO:BP	regulation of trans-synaptic signaling	12069	19085	c(\GO:0010646\", \"GO:0023051\", \"GO:0099537\")"	IDA IMP IBA,IMP ISO IEA,IBA,IMP ISO IEA,IMP,IDA IMP,ISO IEA,IDA IMP ISO IBA,IDA IMP,IMP,IDA IMP,IMP,IDA,IMP,IMP,IMP,IDA IBA IC,IDA IMP ISO,IMP,IBA,IMP,IDA IMP,ISO IEA,IDA IMP NAS,IMP,IBA,ISO IEA,IDA IMP ISO,IEA,IDA IMP,IBA,IDA IMP IBA,IEA,IDA IMP IEP,IMP IGI,IMP,IBA,ISO IEA,ISO,IGI,IMP,IDA IMP,IMP IGI TAS,IDA IMP,IDA,IMP,IMP IBA,ISO IBA NAS IEA,IDA IMP,IMP,ISO IEA,IDA IMP,IDA IMP IEP,IMP,IMP IBA,…	Grin3a,Cnr1,Shisa6,Syt1,Hras,Chrna4,Egfr,Ntrk2,Adcy1,Cntnap2,Igf1,Chrd,Gpr158,Slc38a1,Sqstm1,Braf,Shisa9,Wnt5a,Slc4a8,Cplx1,Kcnc4,P2rx3,Slc6a1,Nrxn1,Slc7a11,Cacng5,Cacna1b,Ngfr,Map1b,Cdh11,Erc2,Lrrc4,Hdac6,Sorcs3,Nf1,Cpeb3,Mctp1,Kit,Pde4a,Lrrtm2,Map1a,Ube3a,Psen1,Mapk9,Ace,Slc6a9,Slc24a2,Grin2d,Sv2c,Pcdh17,Gnai2,Plcb4,Iqsec1,Plppr4,Shisa7,Slc4a10,Tmem108,Chrna7,Pclo,Nlgn3,Myo5a,Flot1,Cacng2,Ptpn5…	FALSE	16.4055
8	query_1	TRUE	1.03882e-06	997	976	140	0.143443	0.140421	GO:0055085	GO:BP	transmembrane transport	12069	14236	c(\GO:0006810\", \"GO:0009987\")"	ISO IBA IEA,IEA,ISS ISO IEA,IDA ISO IBA IEA,IEA,IDA IMP ISS ISO IBA IEA,IEA,IEA,IEA,IBA IEA,IEA,IEA,ISO IEA,ISS ISO IBA IEA,ISS ISO IBA IEA,ISS ISO IEA,ISS ISO IEA,IDA,IEA,IEA,ISS ISO IBA IEA,ISO IBA IEA,IMP IBA,IEA,IBA,IDA IBA,IDA ISO IBA IEA,ISS ISO IBA IEA,ISS ISO IBA IEA,IEA,IEA,ISS ISO IEA,IBA IEA,IEA,ISO IEA,IDA,IEA,IEA,ISO IBA IEA,IBA IEA,ISO IEA,IDA,IDA ISO IBA IEA,ISS IEA,IEA,ISS ISO IBA…	Kcnd3,Grin3a,Aqp11,Hcn3,Thbs1,Slc1a2,Slc22a23,Slc36a4,Lasp1,Scn3a,Chrna4,Slc22a17,Atp2b3,Abcd1,Slc25a1,Igf1,Xpr1,Steap2,Sv2a,Clcn2,Slc39a6,Kcna3,Ubash3b,Slc32a1,Plch2,Slc6a7,Slc36a1,Sfxn3,Slc38a1,Slc7a14,Unc80,Cemip,Ano10,Slc35e2,Braf,Shisa9,Clcn5,Kcnj6,Slc4a8,Kcnc4,Lrrc55,Klf15,Kcna2,Slc25a17,Cnnm4,P2rx3,Slc6a1,Slc39a9,Slc7a5,Nrxn1,Slc7a11,Tmem38a,Cacng5,Lrrc8c,Clcn6,Cacna1b,Cachd1,Slc23a2,Slc4a…	FALSE	13.7774
9	query_1	TRUE	1.30538e-06	596	976	96	0.0983607	0.161074	GO:0007610	GO:BP	behavior	12069	3067	GO:0032501	IMP,IMP ISO IEA,IMP,ISO IEA,IEA,IMP,IMP,IMP ISO IEA,ISO IEA,IMP ISO,IMP,ISO IEA,IGI,IMP IGI ISO IEA,ISO,IEA,IMP,IGI,ISO,IMP,IMP,IMP,IMP,IMP,IMP,IMP IGI ISO,IMP ISO IEA,IMP,IMP ISO,IDA IMP,IMP,IMP,IMP,IMP,IMP,IMP,IMP IGI,IMP,IMP,ISO IEA,IMP,IMP,IMP,ISO,IMP,IMP,ISO IEA,IMP,ISO IEA,IMP IGI ISO TAS IEA,IGI,IMP,ISO IEA,IMP,IMP,TAS,IMP,IMP,IMP,IDA,IMP,IMP,IMP,IMP,IMP,IMP,IMP IGI ISO,IMP,IMP ISO IEA,IMP…	Thrb,Abat,Hipk2,Cnr1,Synj1,Slc1a2,Scn3a,Chrna4,Egfr,Ntrk2,Tmod2,Ncoa1,Adcy1,Cntnap2,Igf1,Amfr,Chrd,Rcan2,Aldh2,Chd8,Gad1,Astn1,Braf,Tbr1,Kcna2,P2rx3,Slc6a1,Homer2,Nrxn1,Slc7a11,Cacna1b,Zmpste24,Lsamp,Gnao1,Tmod1,Sorcs3,Nf1,Cpeb3,Clcn3,Kit,Fzd4,Ap1s2,Pde8b,Cort,Map1a,Alk,Pgrmc1,Slc12a5,Ube3a,Psen1,Fgf12,Htra2,Ace,Slc24a2,Grin2d,Mchr1,Pcdh17,Cntfr,Chl1,Calca,Cend1,Adarb1,Inpp5f,Adam22,Shisa7,Slc4a1…	TRUE	13.549
10	query_1	TRUE	8.92898e-06	799	976	116	0.118852	0.145181	GO:0006811	GO:BP	monoatomic ion transport	12069	2491	GO:0006810	ISO IBA IEA,IMP ISO IEA,ISO IEA,IDA ISO IBA IEA,IDA,IEA,ISS ISO IEA,IBA IEA,IGI IEA,IMP IEA,ISO IEA,ISO,IDA IBA IEA,ISO IBA IEA,ISS ISO IBA IEA,ISO IBA IEA,IMP IBA,IEA,IBA,IBA,IDA ISO IBA IEA,IEA,IEA,IEA,ISS ISO IEA,ISO IBA IEA,ISO IEA,IEA,ISO IEA,IBA IEA,ISO IEA,IDA ISO IBA IEA,IMP IBA IEA,IMP IBA IEA,ISO IBA IEA,ISS ISO IEA,IBA,IDA IGI IEA,IEA,IMP ISS ISO IEA,ISS ISO IEA,IMP ISO IBA IEA,IMP,IEA…	Kcnd3,Grin3a,Cnr1,Hcn3,Slc1a2,Slc22a23,Lasp1,Scn3a,Chrna4,Slc22a17,Atp2b3,Igf1,Steap2,Clcn2,Slc39a6,Kcna3,Ubash3b,Slc32a1,Plch2,Slc6a7,Slc36a1,Sfxn3,Slc38a1,Unc80,Cemip,Ano10,Clcn5,Kcnj6,Slc4a8,Kcnc4,Lrrc55,Kcna2,Cnnm4,P2rx3,Slc6a1,Slc39a9,Homer2,Tmem38a,Cacng5,Lrrc8c,Clcn6,Cacna1b,Zmpste24,Cachd1,Slc23a2,Slc4a3,Nalf1,Gnao1,Slc6a8,Slc30a7,Lrrc8b,Clcn3,Kcnc2,Cnnm3,Kcnab2,Tmem266,Gabrg3,Gabrq,Ramp3…	FALSE	11.6262
11	query_1	TRUE	9.35634e-05	708	976	103	0.105533	0.14548	GO:0046903	GO:BP	secretion	12069	12430	GO:0006810	ISO IEA,ISO IBA IEA,ISO IEA,ISO IEA,IBA,IDA IMP IEP ISS ISO IBA IEA,IBA,IMP,ISO IEA,IPI ISO,IMP IGI,IEA,IDA IMP ISO IBA,ISO IEA,ISO IEA,ISS ISO IEA,IDA IMP ISO IEA,IGI IBA IEA,IMP,IDA,ISO IEA,IMP,IDA IMP IGI IBA IEA,IMP IGI IBA IEA,ISO,IMP ISO IEA,IDA IBA IEA,IDA IMP ISO IBA IEA,ISS IEA,IMP,IEA,IMP,ISO IEA,IGI TAS,IMP IEA,IMP ISO,ISO IEA,IMP,IMP,ISO,IDA IMP,IBA IEA,IMP IGI,IDA IBA,IBA,IBA,ISS ISO…	Sfrp1,Rab2b,Abat,Cnr1,Syt13,Syt1,Syt17,Chrna4,Egfr,Ntrk2,Ccnd1,Ncoa1,Syt9,Igf1,Arf6,Steap2,Sv2a,Lin7c,Clock,Gpr158,Pofut2,Braf,Rph3a,Syn2,Trim9,Slc4a8,Lgi3,Cplx1,Tunar,Kcnc4,Uprt,Kcna2,Slc6a1,Nrxn1,Plek,Cacna1b,Pck2,Med1,Gnao1,Nppc,Erc2,Syn3,Nf1,Rab3c,Stx17,Mctp1,Kit,Exoc8,Fzd4,Syngr3,Sec24a,Pde8b,Irs1,Tvp23a,Wnk3,Psen1,Mapk9,Dpysl2,Ace,Slc6a9,Sv2c,Gnai2,Idh2,Tmem167,Porcn,Lin7a,Pip5k1c,Ptprn,P3h…	FALSE	9.27687
12	query_1	TRUE	0.000111073	1974	976	228	0.233607	0.115502	GO:0007399	GO:BP	nervous system development	12069	2898	GO:0048731	IDA IGI IEA,IDA IGI,IMP ISS ISO IEA,IEA,IMP,IEA,IMP,IMP,ISO IEA,IMP ISO IEA,IEA,ISO IEA,IMP,IMP ISO,IGI,ISO IEA,IMP,IMP,IEA,IMP ISO IBA IEA,IDA IMP IGI ISS ISO IBA IEA,IMP,ISO IEA,IMP IEA,IMP IEA,IMP,IMP,IMP IGI IEP TAS IEA,IDA IMP ISO,IMP ISO IBA IEA,ISO IEA,IDA IMP IGI ISO IEA,IEA,IMP,IEA,IMP,IMP,IEA,IEA,IEA,IBA,IBA,IMP ISO IBA IEA,IDA,IMP ISO,IMP,IMP IGI,IEA,IDA IMP IBA IEA,IMP,ISO IEA,IDA IMP…	Zeb1,Sfrp1,Grin3a,Dnmt3a,Thrb,Abat,Hipk2,Epb41l3,Mmd2,Cnr1,Elavl3,Syt1,Slc1a2,Micall1,Nab1,Syt17,Hras,Hipk1,Ctnnd2,Egfr,Ntrk2,Ccnd1,Dnm3,Ncoa1,Dgkg,Adcy1,Abcd1,Cntnap2,Igf1,Arf6,Clcn2,Chrd,Kcna3,Jam2,Ski,Bmi1,Ttl,Arsb,Slc32a1,Smarcc2,Hapln1,Lama3,Chd8,Gpr158,Atf5,Tet1,Tspan2,Tug1,Astn1,Myo9a,Fbxo7,Braf,Wnt5a,Tbr1,Sema6a,Tunar,Trim67,Tacc1,Klf15,Kcna2,Unc5c,Slc7a5,Arid1a,Nrxn1,Slc7a11,Alcam,Dzip1l…	TRUE	9.10532
13	query_1	TRUE	0.000425601	681	976	98	0.10041	0.143906	GO:0140352	GO:BP	export from cell	12069	19748	c(\GO:0006810\", \"GO:0009987\")"	ISO IBA IEA,ISO IEA,ISO IBA IEA,ISO IEA,ISO IEA,IBA,IDA IMP IEP ISS ISO IBA IEA,IBA,IMP,ISO IEA,IPI ISO,ISO IEA,IDA IMP ISO IBA,ISO IEA,ISO IEA,ISS ISO IEA,IDA IMP,IGI IBA IEA,IMP,IDA,IMP,IDA IMP IGI IBA IEA,IMP IGI IBA IEA,ISO,IMP ISO IEA,IDA IBA IEA,IDA IMP ISO IBA IEA,ISS IEA,IMP,IMP ISO IEA,IGI TAS,IMP IEA,IMP ISO,ISO IEA,IMP,ISO,IDA IMP,IBA IEA,IMP IGI,IDA IBA,IBA,IBA,ISS ISO IEA,ISO NAS IEA…	Kcnd3,Sfrp1,Rab2b,Abat,Cnr1,Syt13,Syt1,Syt17,Chrna4,Egfr,Ntrk2,Atp2b3,Syt9,Igf1,Arf6,Steap2,Sv2a,Lin7c,Clock,Gpr158,Braf,Rph3a,Syn2,Trim9,Slc4a8,Lgi3,Cplx1,Tunar,Kcnc4,Kcna2,Nrxn1,Plek,Cacna1b,Pck2,Gnao1,Nppc,Erc2,Syn3,Nf1,Rab3c,Stx17,Mctp1,Kit,Exoc8,Fzd4,Syngr3,Sec24a,Pde8b,Irs1,Tvp23a,Psen1,Mapk9,Dpysl2,Slc6a9,Sv2c,Gnai2,Idh2,Tmem167,Porcn,Lin7a,Pip5k1c,Ptprn,P3h1,Tgfb3,Ptpn23,Chrna7,Pclo,Gnpta…	FALSE	7.76201
14	query_1	TRUE	0.000895591	1150	976	145	0.148566	0.126087	GO:0003008	GO:BP	system process	12069	1459	GO:0032501	ISO IEA,IMP,IMP IEA,IMP,ISO IBA IEA,ISO IEA,IMP IGI,ISO IEA,IEA,ISO IEA,ISO IBA,IMP ISO TAS IEA,ISO IEA,IMP IGI ISO,IMP IBA,IGI,IMP IGI ISO IEA,IMP,IDA ISO TAS IEA,ISS ISO IEA,IEA,IMP,IMP,IGI,ISO IEA,IMP,IDA IMP,ISO IEA,IMP,IC,ISO IEA,IMP,IMP IBA,ISS ISO IEA,ISO,IMP,ISS ISO IEA,IEA,IMP IGI ISO IEA,IMP ISO IEA,IMP ISO IEA,IDA IMP ISO,IMP,IGI,IBA,IMP,ISO IEA,IMP IGI,ISO IEA,IMP,IDA ISO IEA,ISO,IBA,…	Kcnd3,Ei24,Grin3a,Thrb,Myh8,Abat,Hipk2,Cnr1,Synj1,Pde3a,Scn3a,Chrna4,Egfr,Ntrk2,Tmod2,Adcy1,Cntnap2,Heg1,Igf1,Emp2,Amfr,Chrd,Jam2,Rcan2,Adamts16,Chd8,Gpr158,Cemip,Braf,Shisa9,Clcn5,Tbr1,Cracd,Gclm,Kcnc4,Klf15,Kcna2,Cnnm4,P2rx3,Slc6a1,Homer2,Nrxn1,Slc7a11,Tmem38a,Cacng5,Cacna1b,Plekha7,Zmpste24,Slc4a3,Gnao1,Nppc,Ngfr,Tpm4,Gjd2,Tmod1,Sorcs3,Vegfb,Nf1,Cpeb3,Pnoc,Kit,Kcnab2,Apbb2,Fzd4,Ap1s2,Smad5,Tpp…	FALSE	7.01803
15	query_1	TRUE	0.00108969	582	976	86	0.0881148	0.147766	GO:0030001	GO:BP	metal ion transport	12069	6646	GO:0006812	ISO IBA IEA,IMP ISO IEA,IDA ISO IBA IEA,IBA IEA,IGI,IMP IEA,ISO IEA,ISO,IDA IBA IEA,ISS ISO IBA IEA,ISO IBA IEA,IMP IBA,IBA,IBA,IEA,ISS ISO IEA,IEA,ISO IEA,IBA IEA,ISO IEA,IDA ISO IBA IEA,IMP IBA IEA,IBA,ISO IBA IEA,ISS ISO IEA,IBA,IDA IGI IEA,IEA,IMP ISO IBA IEA,IMP,IEA,IEA,IBA,ISO,IBA IEA,IDA ISO IBA IEA,ISS ISO IBA IEA,ISS ISO IBA IEA,ISO IBA IEA,ISS ISO IBA IEA,ISS ISO IBA IEA,IBA IEA,IGI ISS…	Kcnd3,Grin3a,Hcn3,Scn3a,Chrna4,Slc22a17,Atp2b3,Igf1,Steap2,Slc39a6,Kcna3,Ubash3b,Plch2,Slc6a7,Slc38a1,Cemip,Kcnj6,Slc4a8,Kcnc4,Lrrc55,Kcna2,Cnnm4,P2rx3,Slc6a1,Slc39a9,Homer2,Tmem38a,Cacng5,Cacna1b,Zmpste24,Cachd1,Slc23a2,Nalf1,Gnao1,Slc6a8,Slc30a7,Kcnc2,Kcnab2,Ramp3,Slc12a5,Wnk3,Psen1,Fgf12,Ace,Slc6a9,Slc24a2,Thy1,Slc5a5,Grin2d,Mchr1,Gnai2,Plcb4,Tmbim6,Maged2,Nectin1,Lmtk2,Slc4a10,Chrna7,Cacnb1,C…	FALSE	6.82187
16	query_1	TRUE	0.00143733	641	976	92	0.0942623	0.143526	GO:0034220	GO:BP	monoatomic ion transmembrane transport	12069	8508	c(\GO:0006811\", \"GO:0055085\")"	ISO IBA IEA,IEA,IDA ISO IBA IEA,IDA,IEA,IBA IEA,IEA,ISO IEA,IDA,IEA,ISS ISO IBA IEA,ISO IBA IEA,IMP IBA,IEA,IBA,IBA,IDA ISO IBA IEA,IEA,IEA,ISS ISO IEA,IBA IEA,IEA,IEA,ISO IEA,IBA IEA,ISO IEA,IDA ISO IBA IEA,IEA,IBA IEA,ISO IBA IEA,ISS ISO IEA,IDA IGI IEA,IEA,IMP ISS ISO IEA,IEA,IMP IBA IEA,IEA,IEA,IBA,IBA,IDA ISO IBA IEA,ISS ISO IEA,IDA IMP ISO IEA,ISS ISO IBA IEA,ISS ISO IBA IEA,IBA IEA,IBA IEA…	Kcnd3,Grin3a,Hcn3,Slc1a2,Lasp1,Scn3a,Chrna4,Atp2b3,Steap2,Clcn2,Slc39a6,Kcna3,Ubash3b,Slc32a1,Plch2,Slc6a7,Slc36a1,Sfxn3,Unc80,Cemip,Ano10,Clcn5,Kcnj6,Slc4a8,Kcnc4,Lrrc55,Kcna2,Cnnm4,P2rx3,Slc6a1,Slc39a9,Tmem38a,Cacng5,Lrrc8c,Clcn6,Cacna1b,Cachd1,Slc4a3,Nalf1,Slc6a8,Slc30a7,Lrrc8b,Clcn3,Kcnc2,Kcnab2,Gabrg3,Gabrq,Slc12a5,Wnk3,Psen1,Fgf12,Gabrb1,Slc6a9,Slc24a2,Thy1,Slc5a5,Grin2d,Sfxn5,Plcb4,Tmbim6,…	FALSE	6.54497
17	query_1	TRUE	0.00199575	636	976	91	0.0932377	0.143082	GO:0032940	GO:BP	secretion by cell	12069	7926	c(\GO:0046903\", \"GO:0140352\")"	ISO IEA,ISO IBA IEA,ISO IEA,ISO IEA,IBA,IDA IMP IEP ISS ISO IBA IEA,IBA,IMP,ISO IEA,IPI ISO,IDA IMP ISO IBA,ISO IEA,ISO IEA,ISS ISO IEA,IDA IMP,IGI IBA IEA,IMP,IDA,IMP,IDA IMP IGI IBA IEA,IMP IGI IBA IEA,ISO,IMP ISO IEA,IDA IBA IEA,IDA IMP ISO IBA IEA,ISS IEA,IMP,IMP,IGI TAS,IMP IEA,IMP ISO,ISO IEA,IMP,ISO,IDA IMP,IBA IEA,IMP IGI,IDA IBA,IBA,IBA,ISS ISO IEA,ISO NAS IEA,IMP,IMP,IMP,ISO IEA,IEA,IBA…	Sfrp1,Rab2b,Abat,Cnr1,Syt13,Syt1,Syt17,Chrna4,Egfr,Ntrk2,Syt9,Igf1,Arf6,Steap2,Sv2a,Lin7c,Clock,Gpr158,Braf,Rph3a,Syn2,Trim9,Slc4a8,Lgi3,Cplx1,Tunar,Kcnc4,Kcna2,Nrxn1,Plek,Cacna1b,Pck2,Gnao1,Nppc,Erc2,Syn3,Nf1,Rab3c,Stx17,Mctp1,Kit,Exoc8,Fzd4,Syngr3,Sec24a,Pde8b,Irs1,Tvp23a,Psen1,Mapk9,Dpysl2,Slc6a9,Sv2c,Gnai2,Idh2,Tmem167,Porcn,Lin7a,Pip5k1c,Ptprn,P3h1,Tgfb3,Ptpn23,Chrna7,Pclo,Gnptab,Myo5a,Rbp4,…	FALSE	6.21673
18	query_1	TRUE	0.00206558	182	976	38	0.0389344	0.208791	GO:0006836	GO:BP	neurotransmitter transport	12069	2506	GO:0006810	IDA IMP IEP ISO IBA IEA,IMP,ISO,IDA IMP,IDA IMP IEA,ISO IBA IEA,IEA,IGI IBA,IDA,IMP,IDA IMP IGI IBA,IMP IGI IBA IEA,ISO,IMP,IDA IMP ISO IBA IEA,IMP,IDA IMP ISO IEA,IGI TAS,IMP ISO,IEA,IDA IMP,IBA IEA,IMP IGI,IBA,ISO,IMP,IDA IMP IEA,IDA IMP IEA,IGI IBA,NAS,ISO IEA,IDA IMP IGI IEA,IDA IMP,ISO IEA,IMP,ISS ISO IEA,ISO IEA,IGI	Syt1,Slc1a2,Ntrk2,Syt9,Sv2a,Slc32a1,Slc6a7,Lin7c,Gpr158,Braf,Rph3a,Syn2,Trim9,Slc4a8,Cplx1,Kcnc4,Slc6a1,Nrxn1,Cacna1b,Slc6a8,Erc2,Syn3,Nf1,Mctp1,Syngr3,Psen1,Slc6a9,Sv2c,Lin7a,Pclo,Flot1,Cadps2,Fbxl20,Vps18,Kcnc3,Brsk1,Rab3b,Nrxn2	FALSE	6.18234
19	query_1	TRUE	0.00559179	1495	976	175	0.179303	0.117057	GO:0022008	GO:BP	neurogenesis	12069	6562	c(\GO:0007399\", \"GO:0030154\")"	IDA,IDA IGI,IMP ISS ISO IEA,IEA,IMP,IMP,IMP,ISO IEA,IMP ISO IEA,ISO IEA,IMP ISO,IGI,ISO IEA,IMP,IMP,IEA,ISO IBA IEA,IDA IMP IGI ISS ISO IBA,IMP,ISO IEA,IMP,IMP IEA,IMP,IMP IGI TAS,IMP ISO,IMP ISO IBA IEA,ISO IEA,IDA,IEA,IMP,IEA,IBA,IBA,IMP ISO,IMP,IMP IGI,IEA,IDA IMP IBA IEA,IMP,ISO IEA,IDA IMP IGI,IDA IMP IGI ISO IBA TAS,IMP IGI IBA,IMP IBA NAS,IMP,IDA IMP,IMP,IDA,IDA IMP IGI IBA IEA,ISO IEA,IDA…	Zeb1,Sfrp1,Grin3a,Dnmt3a,Thrb,Hipk2,Epb41l3,Mmd2,Cnr1,Syt1,Micall1,Nab1,Syt17,Hras,Hipk1,Ctnnd2,Egfr,Ntrk2,Ccnd1,Dnm3,Ncoa1,Dgkg,Adcy1,Cntnap2,Igf1,Arf6,Clcn2,Chrd,Ski,Ttl,Arsb,Hapln1,Lama3,Atf5,Tet1,Tspan2,Tug1,Astn1,Myo9a,Fbxo7,Braf,Wnt5a,Tbr1,Sema6a,Tunar,Trim67,Tacc1,Klf15,Unc5c,Slc7a5,Nrxn1,Alcam,Zfp536,Slc23a2,Med1,Dagla,Ngfr,Map1b,Scrt1,Cdh11,Sox6,Hdac6,Raph1,Nf1,Cpeb3,Kit,Map3k13,Apbb2,Wd…	FALSE	5.18646
20	query_1	TRUE	0.00582168	660	976	92	0.0942623	0.139394	GO:0006812	GO:BP	monoatomic cation transport	12069	2492	GO:0006811	ISO IBA IEA,IMP ISO IEA,IDA ISO IBA IEA,IBA IEA,IGI,IMP IEA,ISO IEA,ISO,IDA IBA IEA,ISS ISO IBA IEA,ISO IBA IEA,IMP IBA,IEA,IBA,IBA,IDA ISO IBA IEA,IEA,IEA,ISS ISO IEA,ISO IEA,IEA,ISO IEA,IBA IEA,ISO IEA,IDA ISO IBA IEA,IMP IBA IEA,IMP IBA IEA,ISO IBA IEA,ISS ISO IEA,IBA,IDA IGI IEA,IEA,IMP ISO IBA IEA,IMP,IEA,IEA,IBA,ISO,IBA IEA,IDA ISO IBA IEA,IDA IMP,ISS ISO IBA IEA,ISS ISO IBA IEA,ISO IBA IEA…	Kcnd3,Grin3a,Hcn3,Scn3a,Chrna4,Slc22a17,Atp2b3,Igf1,Steap2,Slc39a6,Kcna3,Ubash3b,Slc32a1,Plch2,Slc6a7,Slc36a1,Slc38a1,Unc80,Cemip,Ano10,Kcnj6,Slc4a8,Kcnc4,Lrrc55,Kcna2,Cnnm4,P2rx3,Slc6a1,Slc39a9,Homer2,Tmem38a,Cacng5,Cacna1b,Zmpste24,Cachd1,Slc23a2,Nalf1,Gnao1,Slc6a8,Slc30a7,Clcn3,Kcnc2,Kcnab2,Ramp3,Slc12a5,Wnk3,Psen1,Fgf12,Ace,Slc6a9,Slc24a2,Thy1,Slc5a5,Grin2d,Mchr1,Gnai2,Plcb4,Tmbim6,Maged2,Nec…	FALSE	5.14617
21	query_1	TRUE	0.00587857	1308	976	157	0.160861	0.120031	GO:0048699	GO:BP	generation of neurons	12069	12956	GO:0022008	IDA,IDA IGI,IMP ISS ISO IEA,IEA,IMP,IMP,IMP,ISO IEA,IMP ISO IEA,ISO IEA,IMP ISO,ISO IEA,IMP,IEA,ISO IEA,IDA IMP ISS ISO IBA,IMP,ISO IEA,IMP,IMP IEA,IMP,IMP IGI TAS,IMP ISO IBA IEA,IDA,IMP,IEA,IBA,IBA,IMP,IMP,IGI,IEA,IDA IMP IBA IEA,IMP,ISO IEA,IDA IMP IGI,IDA IMP IGI ISO IBA TAS,IMP IGI IBA,IMP IBA NAS,IMP,IDA IMP,IDA IMP IGI IBA IEA,IDA IGI ISO NAS,IMP ISS,IDA,ISO IEA,IMP,IMP,IMP ISO,IMP IGI ISS…	Zeb1,Sfrp1,Grin3a,Dnmt3a,Thrb,Hipk2,Epb41l3,Mmd2,Cnr1,Syt1,Micall1,Syt17,Hipk1,Ctnnd2,Egfr,Ntrk2,Ccnd1,Dnm3,Ncoa1,Dgkg,Adcy1,Cntnap2,Arf6,Chrd,Ttl,Arsb,Hapln1,Lama3,Atf5,Tet1,Tspan2,Tug1,Astn1,Myo9a,Fbxo7,Braf,Wnt5a,Tbr1,Sema6a,Tunar,Trim67,Unc5c,Nrxn1,Alcam,Zfp536,Slc23a2,Med1,Dagla,Ngfr,Map1b,Scrt1,Cdh11,Hdac6,Raph1,Nf1,Cpeb3,Map3k13,Apbb2,Wdr62,Fzd4,Zhx2,Taok3,Ret,Postn,Vwc2,Kif3c,Map1a,Alk,Sa…	FALSE	5.13644
22	query_1	TRUE	0.0100546	1062	976	132	0.135246	0.124294	GO:0048666	GO:BP	neuron development	12069	12924	c(\GO:0030182\", \"GO:0048468\")"	IDA,IMP ISS ISO IEA,IMP,IMP,IMP ISO IEA,ISO IEA,IMP ISO,ISO IEA,IEA,ISO IEA,IDA IMP ISS ISO IBA,ISO IEA,IMP IEA,IMP,IMP IGI TAS,IMP ISO IBA IEA,IMP,IEA,IBA,IMP,IMP,IGI,IEA,IMP,ISO IEA,IDA IMP IGI,IDA IMP IGI ISO TAS,IMP IBA,IMP IBA NAS,IMP,IDA IMP,IDA IMP IGI IBA IEA,IDA ISO NAS,IMP ISS,ISO IEA,IMP ISO,IMP IGI ISS ISO IBA IEA,IGI,IMP IEA,IMP,ISO,IDA IMP,IMP,IGI,IGI ISO IEA,IBA,IMP ISO IEA,ISO IEA…	Sfrp1,Grin3a,Thrb,Epb41l3,Cnr1,Syt1,Micall1,Syt17,Ctnnd2,Egfr,Ntrk2,Dnm3,Dgkg,Adcy1,Cntnap2,Arf6,Ttl,Arsb,Lama3,Atf5,Tet1,Tspan2,Tug1,Myo9a,Fbxo7,Braf,Wnt5a,Tbr1,Sema6a,Tunar,Trim67,Unc5c,Nrxn1,Alcam,Slc23a2,Ngfr,Map1b,Cdh11,Hdac6,Raph1,Nf1,Cpeb3,Map3k13,Apbb2,Fzd4,Taok3,Ret,Postn,Kif3c,Map1a,Alk,Sarm1,Pgrmc1,Slc12a5,Npr2,Alkal2,Ube3a,Psen1,Mapk9,Cflar,Dpysl2,Gabrb1,Htra2,Thy1,Fut9,Ndnf,Iqsec1,Dd…	FALSE	4.59972
23	query_1	TRUE	0.0115298	1249	976	150	0.153689	0.120096	GO:0030182	GO:BP	neuron differentiation	12069	6699	c(\GO:0030154\", \"GO:0048699\")"	IDA,IDA IGI,IMP ISS ISO IEA,IEA,IMP,IMP,IMP,ISO IEA,IMP ISO IEA,ISO IEA,IMP ISO,ISO IEA,IMP,IEA,ISO IEA,IDA IMP ISS ISO IBA,IMP,ISO IEA,IMP,IMP IEA,IMP,IMP IGI TAS,IMP ISO IBA IEA,IDA,IMP,IEA,IBA,IMP,IMP,IGI,IEA,IMP,ISO IEA,IDA IMP IGI,IDA IMP IGI ISO IBA TAS,IMP IGI IBA,IMP IBA NAS,IMP,IDA IMP,IDA IMP IGI IBA IEA,IDA IGI ISO NAS,IMP ISS,IDA,ISO IEA,IMP,IMP ISO,IMP IGI ISS ISO IBA IEA,IGI,IMP IEA…	Zeb1,Sfrp1,Grin3a,Dnmt3a,Thrb,Hipk2,Epb41l3,Mmd2,Cnr1,Syt1,Micall1,Syt17,Hipk1,Ctnnd2,Egfr,Ntrk2,Ccnd1,Dnm3,Ncoa1,Dgkg,Adcy1,Cntnap2,Arf6,Chrd,Ttl,Arsb,Lama3,Atf5,Tet1,Tspan2,Tug1,Myo9a,Fbxo7,Braf,Wnt5a,Tbr1,Sema6a,Tunar,Trim67,Unc5c,Nrxn1,Alcam,Zfp536,Slc23a2,Med1,Ngfr,Map1b,Cdh11,Hdac6,Raph1,Nf1,Cpeb3,Map3k13,Apbb2,Wdr62,Fzd4,Zhx2,Taok3,Ret,Postn,Vwc2,Kif3c,Map1a,Alk,Sarm1,Pgrmc1,Slc12a5,Npr2,A…	FALSE	4.46282
24	query_1	TRUE	0.0241619	576	976	81	0.0829918	0.140625	GO:0098660	GO:BP	inorganic ion transmembrane transport	12069	18816	GO:0055085	ISO IBA IEA,IEA,IDA ISO IBA IEA,IBA IEA,ISO IEA,ISS ISO IEA,IDA,IEA,ISS ISO IBA IEA,ISO IBA IEA,IMP IBA,IEA,IBA,IBA,IDA ISO IBA IEA,ISS ISO IEA,IBA,IEA,IEA,ISO IEA,IBA IEA,ISO IEA,IDA ISO IBA IEA,IEA,ISS ISO IBA IEA,ISO IBA IEA,ISS ISO IEA,IDA IGI IEA,IEA,IEA,IMP IBA IEA,IEA,IEA,IBA,IBA,IDA ISO IBA IEA,IDA IMP ISO IEA,ISS ISO IBA IEA,ISS ISO IBA IEA,IBA,IBA IEA,ISS ISO IBA IEA,ISS IBA,IEA,ISS ISO…	Kcnd3,Grin3a,Hcn3,Scn3a,Atp2b3,Xpr1,Steap2,Clcn2,Slc39a6,Kcna3,Ubash3b,Slc32a1,Plch2,Slc6a7,Slc36a1,Cemip,Ano10,Clcn5,Kcnj6,Slc4a8,Kcnc4,Lrrc55,Kcna2,Cnnm4,P2rx3,Slc6a1,Slc39a9,Tmem38a,Cacng5,Clcn6,Cacna1b,Cachd1,Slc4a3,Nalf1,Slc6a8,Slc30a7,Clcn3,Kcnc2,Kcnab2,Gabrg3,Gabrq,Slc12a5,Wnk3,Psen1,Fgf12,Gabrb1,Slc6a9,Slc24a2,Thy1,Slc5a5,Grin2d,Plcb4,Tmbim6,Ano4,Atp6v0e2,Slc4a10,Cacnb1,Cacng2,Nedd4l,Pdpk…	FALSE	3.72298
25	query_1	TRUE	0.0273343	959	976	120	0.122951	0.12513	GO:0031175	GO:BP	neuron projection development	12069	7086	c(\GO:0048666\", \"GO:0120036\")"	IDA,IMP ISS ISO IEA,IMP,IMP ISO IEA,ISO IEA,IMP ISO,ISO IEA,IEA,ISO IEA,IDA ISS ISO IBA,ISO IEA,IMP,IMP,IMP IGI,IMP ISO IBA IEA,IMP,IEA,IBA,IMP,IGI,IMP,ISO IEA,IDA IMP IGI,IDA IGI ISO TAS,IMP IBA,IMP IBA NAS,IMP,IDA IMP,IDA IMP IGI IBA IEA,ISO NAS,IMP ISS,ISO IEA,IMP ISO,IMP IGI ISS ISO IBA IEA,IGI,IMP IEA,IMP,ISO,IDA IMP,IMP,IGI,IGI ISO IEA,IBA,IMP ISO IEA,ISO IEA,ISO,IBA,IMP,IMP,IEA,ISO IEA,IMP…	Sfrp1,Grin3a,Epb41l3,Cnr1,Syt1,Micall1,Syt17,Ctnnd2,Egfr,Ntrk2,Dnm3,Dgkg,Adcy1,Cntnap2,Arf6,Ttl,Arsb,Lama3,Tet1,Tspan2,Myo9a,Fbxo7,Braf,Wnt5a,Tbr1,Sema6a,Tunar,Trim67,Unc5c,Nrxn1,Alcam,Slc23a2,Ngfr,Map1b,Cdh11,Hdac6,Raph1,Nf1,Cpeb3,Map3k13,Apbb2,Fzd4,Taok3,Ret,Postn,Kif3c,Map1a,Alk,Sarm1,Pgrmc1,Slc12a5,Npr2,Alkal2,Ube3a,Psen1,Mapk9,Cflar,Dpysl2,Thy1,Fut9,Ndnf,Iqsec1,Ddr2,Fzd3,Chl1,Inpp5j,Plppr4,A…	FALSE	3.59961
26	query_1	TRUE	0.0318828	714	976	95	0.0973361	0.133053	GO:0050877	GO:BP	nervous system process	12069	13322	GO:0003008	IMP,IMP IEA,IMP,ISO IEA,ISO IEA,IMP,ISO IEA,IEA,ISO IBA,IMP ISO TAS IEA,ISO IEA,IMP IGI ISO,IMP,IGI,IMP IGI ISO IEA,IDA ISO TAS,IEA,IMP,IMP,IGI,IMP,IDA IMP,ISO IEA,IMP,IC,IMP,ISO,ISS ISO IEA,IEA,IGI ISO IEA,IMP ISO IEA,IMP ISO IEA,IDA IMP ISO,IMP,IBA,IMP IGI,ISO,IMP,IMP,IMP IGI ISO IEA,IMP,IGI IBA,IMP ISO IEA,IMP,IMP,IMP,IMP ISO,IMP,IGI,IDA IMP,IMP,ISO IEA,IMP,IMP,ISO IEA,IMP IGI ISO TAS IEA,IGI …	Ei24,Grin3a,Thrb,Myh8,Abat,Hipk2,Cnr1,Synj1,Scn3a,Chrna4,Egfr,Ntrk2,Tmod2,Adcy1,Cntnap2,Igf1,Amfr,Chrd,Jam2,Rcan2,Chd8,Gpr158,Cemip,Braf,Shisa9,Tbr1,Kcnc4,Kcna2,Cnnm4,P2rx3,Slc6a1,Homer2,Nrxn1,Slc7a11,Cacng5,Zmpste24,Ngfr,Gjd2,Sorcs3,Nf1,Cpeb3,Pnoc,Kit,Kcnab2,Fzd4,Ap1s2,Tppp,Pde8b,Pde4a,Map1a,Sarm1,Pgrmc1,Slc12a5,Npr2,Ube3a,Psen1,Fgf12,Slc24a2,Grin2d,Chl1,Calca,Adarb1,Aqp4,Shisa7,Slc4a10,Tmem108,…	FALSE	3.44569
27	query_1	TRUE	0.0419387	142	976	30	0.0307377	0.211268	GO:0099643	GO:BP	signal release from synapse	12069	19183	c(\GO:0023061\", \"GO:0099536\")"	IDA IMP IEP ISO IBA IEA,ISO,IDA IMP,IDA IMP,IGI IBA,IDA,IMP,IDA IMP IGI IBA,IMP IGI IBA IEA,ISO,IMP,IDA IMP ISO IBA,IMP,IGI TAS,IMP ISO,IDA IMP,IBA IEA,IMP IGI,IBA,IMP,IMP,IDA IMP,IGI IBA,NAS,IDA IMP IGI IEA,IDA IMP,ISO IEA,IMP,ISS ISO IEA,IGI	Syt1,Ntrk2,Syt9,Sv2a,Lin7c,Gpr158,Braf,Rph3a,Syn2,Trim9,Slc4a8,Cplx1,Kcnc4,Nrxn1,Cacna1b,Erc2,Syn3,Nf1,Mctp1,Psen1,Slc6a9,Sv2c,Lin7a,Pclo,Cadps2,Fbxl20,Vps18,Kcnc3,Brsk1,Nrxn2	FALSE	3.17155
28	query_1	TRUE	0.0419387	142	976	30	0.0307377	0.211268	GO:0007269	GO:BP	neurotransmitter secretion	12069	2797	c(\GO:0006836\", \"GO:0007268\", \"GO:0051649\", \"GO:0099643\")"	IDA IMP IEP ISO IBA IEA,ISO,IDA IMP,IDA IMP,IGI IBA,IDA,IMP,IDA IMP IGI IBA,IMP IGI IBA IEA,ISO,IMP,IDA IMP ISO IBA,IMP,IGI TAS,IMP ISO,IDA IMP,IBA IEA,IMP IGI,IBA,IMP,IMP,IDA IMP,IGI IBA,NAS,IDA IMP IGI IEA,IDA IMP,ISO IEA,IMP,ISS ISO IEA,IGI	Syt1,Ntrk2,Syt9,Sv2a,Lin7c,Gpr158,Braf,Rph3a,Syn2,Trim9,Slc4a8,Cplx1,Kcnc4,Nrxn1,Cacna1b,Erc2,Syn3,Nf1,Mctp1,Psen1,Slc6a9,Sv2c,Lin7a,Pclo,Cadps2,Fbxl20,Vps18,Kcnc3,Brsk1,Nrxn2	FALSE	3.17155
29	query_1	TRUE	1.75526e-11	1455	986	203	0.205882	0.139519	GO:0045202	GO:CC	synapse	12191	2106	GO:0030054	IDA IBA,IDA IMP ISO IBA IEA,IDA,IDA IMP IEA,ISO IEA,IDA IMP IEP IBA IEA,IDA IMP IEP ISO IBA TAS IEA,IEA,IDA IMP ISO IEA,ISO,IDA ISO IEA,ISO IEA,IDA IMP IEP ISO IBA IEA,IDA ISO IBA IEA,IEA,IDA ISO IEA,ISO IEA,IDA IMP IEP IEA,IDA IPI IMP IEA,IDA,IDA IMP IEP IEA,IDA IMP IEA,IEA,ISO IEA,IDA IMP ISO IBA IEA,IEA,IEA,ISO IEA,IDA ISS ISO IEA,IDA IEA,ISO IEA,EXP IDA IBA,IDA ISO IBA IEA,IDA IEA,IDA IMP ISO…	Kcnd3,Grin3a,Epb41l3,Cnr1,Hcn3,Shisa6,Syt1,Synj1,Slc1a2,Lasp1,Iqsec3,Hras,Chrna4,Ntrk2,Tmod2,Dnm3,Atp2b3,Adcy1,Cntnap2,Ablim3,Syt9,Igf1,Lamp5,Arf6,Sv2a,Chrd,Rgs8,Kcna3,Slc32a1,Samd4,Slc6a7,Hapln1,Lin7c,Gpr158,Gad1,Purg,Psd2,Myo9a,Braf,Rph3a,Shisa9,Syn2,Trim9,Sst,Clcn5,Wnt5a,Slc4a8,Lgi3,Cplx1,Gad2,Kif1b,Kcnc4,Kcna2,Unc5c,P2rx3,Slc6a1,Homer2,Nrxn1,Adgra1,Cacng5,Cacna1b,Htr5a,Dagla,Slc6a8,Ngfr,Map1b…	FALSE	24.7658
30	query_1	TRUE	2.53857e-10	1852	986	239	0.242394	0.12905	GO:0030054	GO:CC	cell junction	12191	846	GO:0110165	IDA IEA,IDA IBA,IDA IMP ISO IBA IEA,IDA ISS ISO IEA,IDA IMP IEA,ISO IEA,IDA IMP IEP IBA IEA,IDA IMP IEP ISO IBA TAS IEA,IEA,IDA IMP ISO IEA,IDA ISO IBA,IDA ISO IEA,ISO IEA,IDA IMP IEP ISO IBA IEA,ISO IEA,IDA ISO IBA IEA,IDA,IEA,IDA ISO IEA,ISO IEA,ISO IEA,IDA IMP IEP IEA,IDA IPI IMP IEA,IDA,IDA IMP IEP IEA,IDA ISO IEA,IDA IMP IEA,IEA,ISO IEA,IDA IMP ISO IBA IEA,IEA,IEA,ISO IEA,IDA ISO IBA IEA,IDA…	Cd99l2,Kcnd3,Grin3a,Epb41l3,Cnr1,Hcn3,Shisa6,Syt1,Synj1,Slc1a2,Lasp1,Iqsec3,Hras,Chrna4,Egfr,Ntrk2,Ccnd1,Tmod2,Dnm3,Ccdc85a,Atp2b3,Adcy1,Cntnap2,Ablim3,Syt9,Heg1,Igf1,Lamp5,Arf6,Sv2a,Chrd,Rgs8,Kcna3,Jam2,Slc32a1,Samd4,Slc6a7,Hapln1,Lin7c,Lama3,Gpr158,Gad1,Purg,Psd2,Myo9a,Braf,Rph3a,Shisa9,Syn2,Trim9,Sst,Clcn5,Wnt5a,Slc4a8,Lgi3,Cplx1,Gad2,Kif1b,Kcnc4,Kcna2,Unc5c,Flcn,P2rx3,Slc6a1,Homer2,Nrxn1,Adgr…	FALSE	22.0943
31	query_1	TRUE	1.03855e-07	675	986	108	0.109533	0.16	GO:0098793	GO:CC	presynapse	12191	3197	c(\GO:0045202\", \"GO:0110165\")"	IEA,IDA IMP IEA,ISO IEA,IDA ISO IBA TAS IEA,IEA,ISO IEA,IDA IMP IEP ISO,IDA ISO IBA,IDA,ISO,IEA,IDA IMP,IDA IMP IEP IEA,IEA,ISO IEA,IDA ISO IBA IEA,IEA,ISO IEA,IDA ISS ISO IEA,ISO,IEA,IEA,IDA IMP ISO IBA,IEA,ISS ISO IBA IEA,IDA ISO IBA IEA,ISO IEA,IBA,IDA ISO IEA,IDA IBA IEA,IDA ISO IBA IEA,ISO IEA,IEA,IDA ISO IBA,IDA ISO IBA IEA,ISO,ISO IEA,IDA IMP IEA,IDA ISO,ISO,IDA,ISO IEA,IDA ISS ISO IBA IEA…	Grin3a,Cnr1,Hcn3,Syt1,Synj1,Slc1a2,Chrna4,Ntrk2,Dnm3,Atp2b3,Adcy1,Cntnap2,Syt9,Lamp5,Arf6,Sv2a,Chrd,Kcna3,Slc32a1,Slc6a7,Lin7c,Gpr158,Gad1,Braf,Rph3a,Syn2,Trim9,Clcn5,Slc4a8,Lgi3,Cplx1,Gad2,Kif1b,Kcnc4,Kcna2,P2rx3,Slc6a1,Nrxn1,Cacna1b,Ngfr,Rgs7bp,Wdr7,Erc2,Syn3,Nf1,Rab3c,Clcn3,Mctp1,Kcnc2,Pnoc,Kcnab2,Ap1s2,Syngr3,Marcksl1,Kif3c,Psen1,Dpysl2,Gabrb1,Slc6a9,Grin2d,Sv2c,Pcdh17,Dnajc5,Iqsec1,Dnajc6,Fz…	FALSE	16.0803
32	query_1	TRUE	1.28249e-07	431	986	79	0.0801217	0.183295	GO:0097060	GO:CC	synaptic membrane	12191	2841	c(\GO:0045202\", \"GO:0098590\")"	IDA IBA,IDA ISO IBA IEA,IDA IMP,IDA IMP IEP IBA IEA,IDA,ISO IEA,IDA,IDA IMP IEP ISO IEA,ISO,ISO IEA,ISO,IDA IEP,IDA IEA,ISO IEA,ISO IEA,IEA,IDA IEA,ISO IBA IEA,IDA IMP IEP IBA IC IEA,IDA,IEA,ISO IBA,ISO IEA,ISO,ISO IEA,IDA IMP IEA,ISO IBA IEA,ISO IEA,IDA ISS ISO IBA IEA,ISO,ISO,IDA,ISS ISO,IDA ISO IEA,IDA IEP,ISO,IDA ISO IBA IEA,IGI,ISO,ISO,IDA IEA,ISO IEA,IEA,ISO IEA,ISO IEA,ISO IEA,ISO IBA NAS …	Kcnd3,Grin3a,Cnr1,Shisa6,Syt1,Slc1a2,Iqsec3,Chrna4,Ntrk2,Dnm3,Atp2b3,Adcy1,Cntnap2,Kcna3,Slc6a7,Lin7c,Gpr158,Rph3a,Shisa9,Slc4a8,Gad2,Kcnc4,Kcna2,P2rx3,Slc6a1,Nrxn1,Cacng5,Htr5a,Dagla,Slc6a8,Ngfr,Rgs7bp,Erc2,Lrrc4,Sorcs3,Clcn3,Kcnc2,Pnoc,Kcnab2,Marcksl1,Gabrg3,Lrrtm2,Gabrq,Psen1,Gabrb1,Slc6a9,Grin2d,Pcdh17,Dnajc6,Plppr4,Lin7a,Nectin1,Pip5k1c,Adam22,Shisa7,Chrna7,Cntn1,Nlgn3,Gabbr2,Cacng2,Ptpn5,Er…	FALSE	15.8693
33	query_1	TRUE	2.90749e-07	942	986	136	0.137931	0.144374	GO:0036477	GO:CC	somatodendritic compartment	12191	1688	GO:0110165	IEA,ISO IBA IEA,IDA ISO IEA,ISO,ISO IBA IEA,IBA,ISO,ISO,IEA,ISO,ISS ISO IBA IEA,IDA,IDA,ISO IEA,IDA IEA,ISO,IDA IEA,ISO IEA,ISO IEA,ISO IEA,ISS ISO IEA,IDA,IDA ISO IBA IEA,IEA,ISO IEA,IDA,IEA,ISO,IEA,IGI ISO,ISO IEA,IDA IBA IEA,IDA ISO IEA,ISO IEA,IDA ISO IEA,ISO IEA,IBA,ISO IBA,IDA IBA IEA,IDA,IDA IEA,ISO,ISO,IDA,ISO IBA,IDA,IDA IEA,IDA ISO IBA,ISO IBA IEA,IDA ISO IBA IEA,IDA,IDA,ISO IEA,IDA ISO…	Necab2,Kcnd3,Grin3a,Aqp11,Hcn3,Shisa6,Slc1a2,Scn3a,Ctnnd2,Chrna4,Ntrk2,Tubb4a,Cygb,Dnm3,Cntnap2,Igf1,Lamp5,Sv2a,Amfr,Clcn2,Rgs8,Jam2,Slc32a1,Samd4,Slc38a1,Psd2,Unc80,Pcmt1,Astn1,Prkaa2,Rph3a,Shisa9,Trim9,Sst,Slc4a8,Cplx1,Kif1b,Kcnc4,Kcna2,Cntnap3,Unc5c,Cnnm4,P2rx3,Slc6a1,Homer2,Nrxn1,Alcam,Cacna1b,Htr5a,Dagla,Gnao1,Abhd13,Ngfr,Map1b,Rgs7bp,Adcy9,Erc2,Lrrc4,Hdac6,Lynx1,Nf1,Cpeb3,Kcnc2,Pnoc,Fzd4,Tm…	FALSE	15.0508
34	query_1	TRUE	1.90277e-06	1258	986	166	0.168357	0.131955	GO:0043005	GO:CC	neuron projection	12191	1812	GO:0120025	IEA,ISO IEA,ISO IBA IEA,ISO IEA,ISO,IDA ISO,IDA IEA,ISO IBA IEA,IBA,IDA ISO IBA IEA,IDA ISO,ISO IBA,IDA,ISO IBA,IDA ISS ISO IBA IEA,IDA,ISO,IDA,ISO IEA,ISO,IDA IMP ISS ISO IEA,IDA IEA,IDA ISO IBA IEA,ISO IEA,ISO IEA,ISS ISO IEA,IDA ISO IBA IEA,IDA ISO IBA IEA,IEA,IDA,IDA,IDA,IBA IEA,IDA IBA IEA,IGI ISO,ISO IEA,IDA,ISS ISO IBA IEA,IDA IBA IEA,IDA ISO IEA,NAS,IDA ISO IEA,IDA IEA,IDA ISO IBA,IDA,ISS…	Necab2,Ocrl,Kcnd3,Grin3a,Aqp11,Epb41l3,Cnr1,Hcn3,Shisa6,Syt1,Slc1a2,Scn3a,Ahcyl2,Chrna4,Ntrk2,Tubb4a,Tmod2,Cygb,Dnm3,Atp2b3,Cntnap2,Lamp5,Sv2a,Amfr,Clcn2,Rgs8,Kcna3,Slc32a1,Samd4,Gad1,Slc38a1,Psd2,Unc80,Myo9a,Prkaa2,Fbxo7,Braf,Rph3a,Shisa9,Trim9,Sema6a,Slc4a8,Lgi3,Cplx1,Gad2,Kif1b,Kcnc4,Kcna2,Cntnap3,Unc5c,Cnnm4,P2rx3,Slc6a1,Homer2,Nrxn1,Alcam,Cacna1b,Htr5a,Dagla,Gnao1,Abhd13,Ngfr,Map1b,Rgs7bp,Ad…	FALSE	13.1722
35	query_1	TRUE	1.31878e-05	702	986	105	0.106491	0.149573	GO:0030425	GO:CC	dendrite	12191	910	c(\GO:0043005\", \"GO:0097447\")"	IEA,ISO IBA IEA,ISO,ISO IBA IEA,IBA,ISO,ISO,ISS ISO IBA IEA,ISO IEA,IDA IEA,IDA IEA,ISO IEA,ISO IEA,ISO IEA,ISS ISO IEA,IDA ISO IBA IEA,IEA,IDA,IEA,IGI ISO,ISO IEA,IDA IBA IEA,IDA ISO IEA,ISO IEA,ISO,IBA,ISO IBA,IDA IBA IEA,IDA IEA,ISO,ISO,ISO IBA,IEA,IDA ISO,ISO IBA IEA,IDA ISO IBA IEA,IDA,IDA,ISO IEA,IDA ISO IBA IEA,ISO IEA,ISO IEA,IDA,IDA IEA,IEA,ISO IEA,IDA ISO IEA,IDA ISO IBA IEA,IBA,IMP,IEA…	Necab2,Kcnd3,Aqp11,Hcn3,Shisa6,Slc1a2,Chrna4,Ntrk2,Dnm3,Cntnap2,Lamp5,Sv2a,Amfr,Clcn2,Rgs8,Slc32a1,Samd4,Psd2,Unc80,Prkaa2,Rph3a,Shisa9,Trim9,Slc4a8,Cplx1,Kif1b,Kcnc4,Kcna2,Unc5c,Cnnm4,P2rx3,Homer2,Alcam,Cacna1b,Htr5a,Dagla,Gnao1,Abhd13,Ngfr,Map1b,Rgs7bp,Adcy9,Lrrc4,Hdac6,Lynx1,Nf1,Cpeb3,Kcnc2,Pnoc,Fzd4,Tmem151a,Rgs12,Tmem266,Gabrg3,Ret,Kif3c,Map1a,Sarm1,Slc12a5,Psen1,Ift52,Dpysl2,Kif17,Gabrb1,Th…	FALSE	11.2362
36	query_1	TRUE	1.4336e-05	703	986	105	0.106491	0.14936	GO:0097447	GO:CC	dendritic tree	12191	2946	c(\GO:0036477\", \"GO:0043005\")"	IEA,ISO IBA IEA,ISO,ISO IBA IEA,IBA,ISO,ISO,ISS ISO IBA IEA,ISO IEA,IDA IEA,IDA IEA,ISO IEA,ISO IEA,ISO IEA,ISS ISO IEA,IDA ISO IBA IEA,IEA,IDA,IEA,IGI ISO,ISO IEA,IDA IBA IEA,IDA ISO IEA,ISO IEA,ISO,IBA,ISO IBA,IDA IBA IEA,IDA IEA,ISO,ISO,ISO IBA,IEA,IDA ISO,ISO IBA IEA,IDA ISO IBA IEA,IDA,IDA,ISO IEA,IDA ISO IBA IEA,ISO IEA,ISO IEA,IDA,IDA IEA,IEA,ISO IEA,IDA ISO IEA,IDA ISO IBA IEA,IBA,IMP,IEA…	Necab2,Kcnd3,Aqp11,Hcn3,Shisa6,Slc1a2,Chrna4,Ntrk2,Dnm3,Cntnap2,Lamp5,Sv2a,Amfr,Clcn2,Rgs8,Slc32a1,Samd4,Psd2,Unc80,Prkaa2,Rph3a,Shisa9,Trim9,Slc4a8,Cplx1,Kif1b,Kcnc4,Kcna2,Unc5c,Cnnm4,P2rx3,Homer2,Alcam,Cacna1b,Htr5a,Dagla,Gnao1,Abhd13,Ngfr,Map1b,Rgs7bp,Adcy9,Lrrc4,Hdac6,Lynx1,Nf1,Cpeb3,Kcnc2,Pnoc,Fzd4,Tmem151a,Rgs12,Tmem266,Gabrg3,Ret,Kif3c,Map1a,Sarm1,Slc12a5,Psen1,Ift52,Dpysl2,Kif17,Gabrb1,Th…	FALSE	11.1527
37	query_1	TRUE	2.59282e-05	289	986	56	0.0567951	0.193772	GO:0045211	GO:CC	postsynaptic membrane	12191	2107	c(\GO:0097060\", \"GO:0098794\")"	IDA IBA,IDA ISO IBA IEA,IDA IMP IEP IBA IEA,IDA,ISO IEA,ISO,ISO IEA,IDA IEP,ISO IEA,IEA,IDA IEA,ISO IBA IEA,IDA IMP IEP IBA IC IEA,ISO IBA,ISO IEA,ISO IEA,ISO IBA IEA,ISO IEA,IDA ISS ISO IBA IEA,ISO,IDA,IDA ISO IEA,IDA IEP,ISO,IDA IBA IEA,ISO,IEA,ISO IEA,IEA,ISO IEA,ISO IEA,ISO IBA NAS IEA,IDA IEP,IDA IEP ISO IEA,IEA,IDA IMP,IDA IMP IEP IBA IEA,IDA IEP ISO IEA,IDA,ISS ISO,ISO IEA,IDA ISS ISO IBA …	Kcnd3,Grin3a,Shisa6,Iqsec3,Chrna4,Ntrk2,Dnm3,Adcy1,Kcna3,Lin7c,Gpr158,Rph3a,Shisa9,Kcnc4,Kcna2,Slc6a1,Cacng5,Htr5a,Dagla,Slc6a8,Rgs7bp,Lrrc4,Sorcs3,Clcn3,Kcnc2,Kcnab2,Gabrg3,Lrrtm2,Gabrq,Gabrb1,Slc6a9,Grin2d,Pcdh17,Plppr4,Lin7a,Adam22,Shisa7,Chrna7,Cntn1,Nlgn3,Gabbr2,Cacng2,Erbb4,Slc8a2,Cadps2,Gria1,Kcnb1,Pten,Kcnc3,Adra1a,Chrm3,Hip1,Pacsin1,Grin2a,Pcdhb16,Crkl	FALSE	10.5602
38	query_1	TRUE	2.96544e-05	576	986	90	0.0912779	0.15625	GO:0098978	GO:CC	glutamatergic synapse	12191	3257	GO:0045202	IDA IMP ISO IEA,IDA IMP,IDA IMP IEP,IDA IMP IEP,IMP,ISO IEA,ISO,ISO IEA,ISO IEA,IDA IMP,IDA IMP IEA,IDA,IDA IMP,ISO IEA,IDA IMP,ISO IEA,ISO,IDA ISO,IDA IEP,ISO,IDA IMP IEP,IDA IMP,IDA IMP ISO IEA,IDA ISO IEA,IDA IMP,ISO,ISO IEA,IDA,IDA IMP NAS IEA,EXP IDA IBA,ISO IEA,ISO,ISO,IDA IMP,IDA,IDA IMP,IDA IMP ISO IBA IEA,IDA IMP,IDA IMP IEP,IDA IMP ISO,IDA IMP ISO,ISO,IDA,ISO IEA,IDA IMP,IDA IMP IEP,ISO…	Grin3a,Cnr1,Shisa6,Syt1,Slc1a2,Hras,Ntrk2,Dnm3,Atp2b3,Adcy1,Cntnap2,Ablim3,Igf1,Arf6,Sv2a,Kcna3,Slc6a7,Lin7c,Psd2,Myo9a,Shisa9,Syn2,Wnt5a,Slc4a8,Cplx1,Kcnc4,Kcna2,Homer2,Nrxn1,Adgra1,Cacng5,Cacna1b,Slc6a8,Rgs7bp,Cdh11,Erc2,Lrrc4,Syn3,Sorcs3,Nf1,Clcn3,Kcnab2,Fzd4,Lrrtm2,Ube3a,Psen1,Grin2d,Pcdh17,Plcb4,Iqsec1,Porcn,Ppfia4,Plppr4,Pip5k1c,Asap1,Adam22,Shisa7,Cacnb1,Pclo,Nlgn3,Myo5a,Map2k1,Wasf3,Gabbr…	FALSE	10.4259
39	query_1	TRUE	3.45669e-05	677	986	101	0.102434	0.149188	GO:0044297	GO:CC	cell body	12191	2016	GO:0110165	ISO IBA,IDA ISO IEA,ISO IEA,IDA ISO,ISO,IEA,ISO,ISO,IDA,IDA,IDA IEA,ISO,ISO IEA,ISO IEA,ISO IEA,ISS ISO IEA,ISO IEA,ISO IEA,IDA,ISO,IEA,IGI ISO,IDA,ISO IEA,IDA,ISO IEA,ISO IBA,IDA IEA,IDA,IDA,ISO,ISO,IDA,ISO,IDA,IDA,IDA ISO IBA,ISO IEA,IDA,ISO IEA,IDA ISO IBA IEA,ISO IEA,ISO,IDA IEA,IDA ISS ISO IBA IEA,IBA,ISS ISO,ISO,IEA,ISO IEA,ISO,ISO,IDA ISO IBA IEA,ISO,ISO IEA,IDA ISO IEA,IDA IBA,ISO,IDA ISO…	Kcnd3,Grin3a,Hcn3,Slc1a2,Scn3a,Ctnnd2,Chrna4,Ntrk2,Tubb4a,Cygb,Cntnap2,Igf1,Sv2a,Amfr,Clcn2,Rgs8,Pitpnm3,Slc38a1,Psd2,Pcmt1,Astn1,Prkaa2,Braf,Sst,Slc4a8,Cplx1,Kcnc4,Kcna2,Cntnap3,Unc5c,Cnnm4,P2rx3,Slc6a1,Homer2,Nrxn1,Alcam,Cacna1b,Htr5a,Gnao1,Ngfr,Map1b,Rgs7bp,Erc2,Hdac6,Kcnc2,Pnoc,Pitpnm1,Rgs12,Tmem266,Ret,Kif3c,Pam,Map1a,Alk,Pgrmc1,Slc12a5,Psen1,Mapk9,Dpysl2,Sos1,Thy1,Ubxn2a,Gnai2,Slc2a13,Cadm2…	FALSE	10.2726
40	query_1	TRUE	5.18693e-05	203	986	44	0.0446247	0.216749	GO:0042734	GO:CC	presynaptic membrane	12191	1801	c(\GO:0097060\", \"GO:0098793\")"	IDA IMP,IDA,ISO IEA,IDA IMP IEP ISO,ISO,IDA,ISO IEA,ISO,IEA,IDA,IEA,ISO IBA,ISO IEA,ISO,ISO IEA,IDA IMP IEA,ISO,IDA,ISS ISO,IDA ISO IBA IEA,ISO,ISO IEA,ISO IEA,ISO IEA,ISO IEA,IDA IEP,EXP IDA,IDA IEP IEA,ISO,IDA IEP ISO,IDA,ISO,IDA,IDA,IDA IMP IEP IEA,IDA,ISO IEA,ISO IBA IEA,ISO,ISO IEA,ISO IEA,IDA ISO,ISA IEA,ISO	Cnr1,Syt1,Slc1a2,Chrna4,Atp2b3,Cntnap2,Kcna3,Slc6a7,Gpr158,Slc4a8,Gad2,Kcnc4,Kcna2,P2rx3,Slc6a1,Nrxn1,Ngfr,Rgs7bp,Erc2,Kcnc2,Marcksl1,Psen1,Gabrb1,Slc6a9,Grin2d,Pcdh17,Dnajc6,Nectin1,Pip5k1c,Chrna7,Cntn1,Gabbr2,Erbb4,Apba1,Cntnap4,Cadps2,Gria1,Kcnc3,Adra1a,Chrm3,Hip1,Grin2a,Nrxn2,Ctbp1	FALSE	9.86678
41	query_1	TRUE	5.21823e-05	682	986	101	0.102434	0.148094	GO:0030424	GO:CC	axon	12191	909	GO:0043005	IEA,IDA ISO,IDA IEA,ISO IBA IEA,IDA IBA,IDA,ISO IBA,IDA ISO IBA IEA,IDA,ISO,ISO IEA,ISO,IDA ISS ISO IEA,IDA IEA,ISO IEA,IDA ISO IBA IEA,IDA,IDA,IDA,IBA,IDA IBA IEA,IGI ISO,NAS,ISO IEA,IDA IEA,IDA IBA,IDA,IBA IEA,IDA ISO IBA,IDA ISO IBA IEA,IDA,IDA IEA,IDA ISO,IDA IBA,IDA,IDA IEA,ISO,IDA,IEA,ISO IEA,ISO IEA,ISO IEA,ISS ISO,IDA IEA,ISO IEA,IDA,ISS ISO IBA IEA,IBA,IDA ISS ISO IBA IEA,IEA,IEA,ISO IBA…	Necab2,Epb41l3,Cnr1,Hcn3,Syt1,Slc1a2,Scn3a,Ntrk2,Tubb4a,Tmod2,Dnm3,Atp2b3,Cntnap2,Lamp5,Amfr,Kcna3,Slc32a1,Gad1,Slc38a1,Unc80,Myo9a,Prkaa2,Sema6a,Slc4a8,Lgi3,Cplx1,Gad2,Kif1b,Kcnc4,Kcna2,Cntnap3,Unc5c,P2rx3,Slc6a1,Nrxn1,Alcam,Cacna1b,Dagla,Ngfr,Map1b,Rgs7bp,Adcy9,Erc2,Hdac6,Nf1,Clcn3,Kcnc2,Pnoc,Kcnab2,Exoc8,Tmem151a,Ret,Kif3c,Map1a,Alk,Sarm1,Psen1,Dpysl2,Thy1,Ccdc120,Slc2a13,Cadm2,Fzd3,Chl1,Inpp5…	FALSE	9.86077
42	query_1	TRUE	0.000121632	978	986	131	0.13286	0.133947	GO:0098590	GO:CC	plasma membrane region	12191	3158	c(\GO:0005886\", \"GO:0016020\")"	IDA ISO IBA,IDA ISO IBA IEA,IDA,IDA IMP,IDA IMP IEP IBA IEA,IDA,IDA ISO IEA,IDA,IEA,IDA IMP IEP ISO IEA,IDA ISO IBA IEA,ISO,ISO IEA,ISO,IDA IEP,IDA ISS ISO IEA,IDA IEA,IDA,ISS ISO IEA,ISS ISO IEA,ISO IEA,ISO IEA,IBA IEA,IEA,IDA IEA,IDA ISO IEA,IDA IEA,ISO,ISO,ISO IBA IEA,IDA IMP IEP IBA IC IEA,IDA ISO IEA,IEA,ISO IBA,ISO IEA,IDA,ISO,ISO IEA,ISS ISO IEA,IDA IMP IEA,IDA IEA,ISO IBA IEA,ISO IEA,IDA …	Kcnd3,Grin3a,Epb41l3,Cnr1,Shisa6,Syt1,Slc1a2,Iqsec3,Scn3a,Chrna4,Egfr,Ntrk2,Dnm3,Atp2b3,Adcy1,Cntnap2,Emp2,Lamp5,Arf6,Slc39a6,Kcna3,Slc6a7,Lin7c,Slc36a1,Gpr158,Slc38a1,Psd2,Pcmt1,Prkaa2,Rph3a,Shisa9,Slc4a8,Gad2,Kcnc4,Kcna2,Cnnm4,P2rx3,Slc6a1,Slc7a5,Nrxn1,Slc7a11,Cacng5,Plek,Slc23a2,Htr5a,Dagla,Slc6a8,Ngfr,Rgs7bp,Erc2,Lrrc4,Hdac6,Sorcs3,Clcn3,Mtss2,Kcnc2,Pnoc,Kcnab2,Pitpnm1,Marcksl1,Gabrg3,Irs1,Lr…	FALSE	9.01451
43	query_1	TRUE	0.000220069	608	986	91	0.0922921	0.149671	GO:0043025	GO:CC	neuronal cell body	12191	1814	c(\GO:0036477\", \"GO:0044297\")"	ISO IBA,IDA ISO IEA,ISO IEA,ISO,IEA,ISO,ISO,IDA,IDA,IDA IEA,ISO,ISO IEA,ISO IEA,ISO IEA,ISS ISO IEA,ISO IEA,IDA,ISO,IEA,IGI ISO,ISO IEA,IDA,ISO IEA,ISO IBA,IDA IEA,IDA,IDA,ISO,ISO,IDA,ISO,IDA,IDA,IDA ISO IBA,ISO IEA,ISO IEA,IDA ISO IBA IEA,ISO IEA,ISO,IDA IEA,IDA ISS ISO IBA IEA,IBA,ISO,IEA,ISO IEA,ISO,ISO,IDA ISO IBA IEA,ISO IEA,IDA ISO IEA,IDA IBA,ISO,IDA ISO,ISO IEA,ISS ISO,IEA,ISO IBA,IDA,ISO…	Kcnd3,Grin3a,Hcn3,Scn3a,Ctnnd2,Chrna4,Ntrk2,Tubb4a,Cygb,Cntnap2,Igf1,Sv2a,Amfr,Clcn2,Rgs8,Slc38a1,Psd2,Pcmt1,Astn1,Prkaa2,Sst,Slc4a8,Cplx1,Kcnc4,Kcna2,Cntnap3,Unc5c,Cnnm4,P2rx3,Slc6a1,Homer2,Nrxn1,Alcam,Cacna1b,Htr5a,Ngfr,Map1b,Rgs7bp,Erc2,Hdac6,Kcnc2,Pnoc,Rgs12,Tmem266,Ret,Kif3c,Pam,Map1a,Pgrmc1,Slc12a5,Psen1,Mapk9,Dpysl2,Sos1,Thy1,Ubxn2a,Cadm2,Fzd3,Calca,Inpp5f,Lmtk2,Tgfb3,Slc4a10,Chrna7,Pclo,M…	FALSE	8.42157
44	query_1	TRUE	0.00584244	29	986	13	0.0131846	0.448276	GO:0044298	GO:CC	cell body membrane	12191	2017	c(\GO:0005886\", \"GO:0044297\", \"GO:0110165\")"	ISS ISO,IDA,IBA,IDA,ISO,IDA ISS ISO IBA IEA,ISS ISO,ISO IBA,IDA,IDA,ISO IEA,IDA ISS ISO IBA IEA,IDA IBA	Rgs8,Slc4a8,Kcnc4,Kcna2,Ngfr,Kcnc2,Thy1,Cadm2,Atp1b2,Amigo1,Gria1,Kcnb1,Kcnc3	FALSE	5.14261
45	query_1	TRUE	0.00875064	67	986	20	0.020284	0.298507	GO:0032589	GO:CC	neuron projection membrane	12191	1294	c(\GO:0031253\", \"GO:0031256\", \"GO:0043005\")"	IDA,IBA,IDA,ISS ISO IEA,IDA,IDA IBA IEA,IBA,IDA ISO IBA IEA,ISO,ISO IBA IEA,IBA,ISO IEA,ISS ISO,IBA,IDA,IDA IMP ISO IEA,ISO IBA IEA,ISO,IDA,IDA IBA IEA	Epb41l3,Shisa6,Slc1a2,Cntnap2,Lamp5,Shisa9,Kcnc4,Dagla,Ngfr,Kcnc2,Gabrg3,Slc12a5,Thy1,Shisa7,Chrna7,Gria1,Kcnb1,Hcn2,Sptbn1,Kcnc3	FALSE	4.73863
46	query_1	TRUE	0.0100287	1849	986	207	0.209939	0.111952	GO:0120025	GO:CC	plasma membrane bounded cell projection	12191	3384	GO:0042995	IEA,ISO IEA,ISO IBA IEA,ISO IEA,ISO,IDA ISO,IDA IEA,ISO IBA IEA,IBA,IDA ISO IBA IEA,ISO IEA,IDA ISO,ISO IBA,IDA,ISO IBA,ISO IEA,IDA ISS ISO IBA IEA,IDA ISO IEA,ISO,IDA,ISO IEA,ISO,IDA IMP ISS ISO IEA,ISO IEA,IDA IEA,ISO IBA IEA,IDA ISO IBA IEA,ISO IEA,ISO IEA,ISS ISO IEA,ISS ISO IEA,IDA ISO IBA IEA,IDA ISO IBA IEA,IEA,IDA,IDA,IDA IEA,IBA IEA,IDA,ISO,IDA IBA IEA,IGI ISO,ISO IEA,IDA,ISS ISO IBA IEA…	Necab2,Ocrl,Kcnd3,Grin3a,Aqp11,Epb41l3,Cnr1,Hcn3,Shisa6,Syt1,Acap2,Slc1a2,Scn3a,Ahcyl2,Chrna4,Egfr,Ntrk2,Tubb4a,Tmod2,Cygb,Dnm3,Atp2b3,Cntnap2,Ablim3,Lamp5,Arf6,Sv2a,Amfr,Clcn2,Rgs8,Slc39a6,Kcna3,Slc32a1,Samd4,Gad1,Slc38a1,Psd2,Unc80,Sqstm1,Pcmt1,Myo9a,Prkaa2,Fbxo7,Braf,Rph3a,Shisa9,Trim9,Sema6a,Slc4a8,Lgi3,Cplx1,Gad2,Kif1b,Kcnc4,Kcna2,Cntnap3,Unc5c,Cnnm4,Flcn,P2rx3,Slc6a1,Cep41,Slc7a5,Homer2,Nrx…	FALSE	4.60231
47	query_1	TRUE	0.0169835	1927	986	213	0.216024	0.110535	GO:0042995	GO:CC	cell projection	12191	1811	GO:0110165	IEA,ISO IEA,ISO IBA IEA,ISO IEA,ISO,IDA ISO,IDA IEA,ISO IBA IEA,IBA,IDA ISO IBA IEA,ISO IEA,IDA ISO,ISO IBA,IDA,ISO IBA,ISO IEA,IDA ISS ISO IBA IEA,IDA ISO IEA,ISO,IDA,ISO IEA,ISO,IDA IMP ISS ISO IEA,ISO IEA,IDA IEA,ISO IBA IEA,IDA ISO IBA IEA,ISO IEA,ISO IEA,ISS ISO IEA,ISS ISO IEA,IDA ISO IBA IEA,IDA ISO IBA IEA,IEA,IEA,ISO IEA,IDA,IDA,IDA IEA,IBA IEA,IDA,ISO,IDA IBA IEA,IGI ISO,ISO IEA,IDA,ISS…	Necab2,Ocrl,Kcnd3,Grin3a,Aqp11,Epb41l3,Cnr1,Hcn3,Shisa6,Syt1,Acap2,Slc1a2,Scn3a,Ahcyl2,Chrna4,Egfr,Ntrk2,Tubb4a,Tmod2,Cygb,Dnm3,Atp2b3,Cntnap2,Ablim3,Lamp5,Arf6,Sv2a,Amfr,Clcn2,Rgs8,Slc39a6,Kcna3,Slc32a1,Samd4,Gpr158,Pitpnm3,Gad1,Slc38a1,Psd2,Unc80,Sqstm1,Pcmt1,Myo9a,Prkaa2,Fbxo7,Braf,Rph3a,Shisa9,Trim9,Sema6a,Slc4a8,Lgi3,Cplx1,Gad2,Kif1b,Kcnc4,Kcna2,Cntnap3,Unc5c,Cnnm4,Flcn,P2rx3,Slc6a1,Cep41,Sl…	FALSE	4.07551
48	query_1	TRUE	0.0203367	27	986	12	0.0121704	0.444444	GO:0032809	GO:CC	neuronal cell body membrane	12191	1305	c(\GO:0043025\", \"GO:0044298\")"	ISS ISO,IDA,IBA,IDA,ISO,IDA ISS ISO IBA IEA,ISS ISO,ISO IBA,IDA,ISO IEA,IDA ISS ISO IBA IEA,IDA IBA	Rgs8,Slc4a8,Kcnc4,Kcna2,Ngfr,Kcnc2,Thy1,Cadm2,Amigo1,Gria1,Kcnb1,Kcnc3	FALSE	3.89533
49	query_1	TRUE	0.0247328	778	986	102	0.103448	0.131105	GO:0098794	GO:CC	postsynapse	12191	3198	c(\GO:0045202\", \"GO:0110165\")"	IDA IBA,IDA ISO IBA IEA,IDA,IDA IMP IEP IBA IEA,ISO,ISO,IDA IEA,ISO IEA,IDA ISO IBA IEA,ISO IEA,IDA IEP,IDA IMP,IEA,ISO IEA,ISO IEA,IEA,IDA IEA,IDA IEP,ISO,ISO IBA IEA,IDA IMP IEP IBA IC IEA,IDA,IEA,IDA ISO,ISO IBA,ISO IEA,ISO IEA,ISO IEA,IDA IBA IEA,EXP IDA IBA,ISS ISO IBA IEA,ISO IEA,IDA ISS ISO IBA IEA,ISO,IDA IEA,IDA IEA,IDA ISO IBA IEA,IDA ISO IEA,IDA,IDA IEP,ISO IEA,ISO,IDA IBA IEA,IDA ISO,…	Kcnd3,Grin3a,Epb41l3,Shisa6,Slc1a2,Lasp1,Iqsec3,Chrna4,Ntrk2,Dnm3,Adcy1,Cntnap2,Igf1,Arf6,Kcna3,Lin7c,Gpr158,Psd2,Myo9a,Rph3a,Shisa9,Syn2,Wnt5a,Cplx1,Kcnc4,Kcna2,P2rx3,Slc6a1,Homer2,Adgra1,Cacng5,Htr5a,Dagla,Slc6a8,Ngfr,Map1b,Rgs7bp,Lrrc4,Syn3,Sorcs3,Cpeb3,Clcn3,Kcnc2,Kcnab2,Tppp,Gabrg3,Lrrtm2,Gabrq,Map1a,Psen1,Gabrb1,Slc6a9,Grin2d,Pcdh17,Plcb4,Iqsec1,Dnajc6,Plppr4,Lin7a,Pip5k1c,Asap1,Adam22,Shis…	FALSE	3.69963
50	query_1	TRUE	0.0283025	118	986	27	0.0273834	0.228814	GO:0098982	GO:CC	GABA-ergic synapse	12191	3261	GO:0045202	IDA,IDA IMP,IDA ISO,ISO IEA,IDA,IDA IMP,ISO IEA,IDA IMP,EXP IDA IMP,ISO IEA,IDA IMP ISO IEA,IDA IMP NAS,IDA IMP,ISO,ISO IEA,IDA IMP,ISO IEA,EXP IDA IMP ISO IEA,IDA IMP IEP,IBA,ISO,ISO,ISO IEA,IDA IMP,IDA IMP IEP,ISO,IDA	Kcnd3,Cnr1,Iqsec3,Atp2b3,Cntnap2,Sv2a,Slc32a1,Gad1,Sst,Gad2,Slc6a1,Nrxn1,Erc2,Clcn3,Kcnc2,Gabrg3,Lrrtm2,Gabrb1,Pcdh17,Pclo,Nlgn3,Gabbr2,Flot1,Erbb4,Cntnap4,Adra1a,Ctbp1	FALSE	3.5648
51	query_1	TRUE	7.23513e-09	682	980	112	0.114286	0.164223	GO:0022857	GO:MF	transmembrane transporter activity	12095	3568	GO:0005215	ISO IBA IEA,IDA IPI IMP ISO IBA IEA,IDA ISS ISO IBA IEA,IDA ISO IBA IEA,IDA IMP ISO IBA IEA,IEA,IEA,ISS ISO,ISO TAS IEA,IDA IMP IGI ISO IBA TAS IEA,TAS IEA,ISO IBA IEA,ISS ISO IBA IEA,ISS ISO IBA IEA,ISS ISO IEA,IEA,IMP ISS ISO IBA IEA,ISS ISO IBA IEA,ISO IBA IEA,IDA ISS ISO IBA IEA,IDA ISS ISO IBA IEA,IDA ISO IBA IEA,ISS IEA,IDA ISS ISO IBA IEA,IDA IBA IEA,IBA,ISO IBA IEA,IBA,ISO IBA IEA,IEA,IDA…	Kcnd3,Grin3a,Aqp11,Hcn3,Slc1a2,Slc22a23,Slc36a4,Lasp1,Scn3a,Chrna4,Slc22a17,Atp2b3,Abcd1,Slc25a1,Xpr1,Sv2a,Clcn2,Slc39a6,Kcna3,Slc32a1,Slc6a7,Slc36a1,Sfxn3,Slc38a1,Slc7a14,Unc80,Ano10,Slc35e2,Clcn5,Kcnj6,Slc4a8,Cplx1,Kcnc4,Lrrc55,Kcna2,Slc25a17,Cnnm4,P2rx3,Slc6a1,Slc39a9,Slc7a5,Slc7a11,Tmem38a,Cacng5,Lrrc8c,Clcn6,Cacna1b,Cachd1,Slc23a2,Slc4a3,Nalf1,Slc6a8,Slc30a7,Lrrc8b,Gjd2,Clcn3,Kcnc2,Cnnm3,Kcn…	TRUE	18.7443
52	query_1	TRUE	1.03168e-08	747	980	119	0.121429	0.159304	GO:0005215	GO:MF	transporter activity	12095	1335	GO:0003674	ISO IBA IEA,IDA IPI IMP ISO IBA IEA,IDA ISS ISO IBA IEA,IDA ISO IBA IEA,IDA IMP ISO IBA IEA,IEA,IEA,ISS ISO,ISO TAS IEA,IDA IMP IGI ISO IBA TAS IEA,TAS IEA,ISO IBA IEA,ISS ISO IBA IEA,ISS ISO IBA IEA,ISS ISO IEA,IEA,IMP ISS ISO IBA IEA,ISS ISO IBA IEA,ISO IBA IEA,IDA ISS ISO IBA IEA,IDA ISS ISO IBA IEA,IDA ISO IBA IEA,ISS IEA,IEA,IDA ISS ISO IBA IEA,IDA IBA IEA,IBA,ISO IBA IEA,IBA,ISO IBA IEA,IEA…	Kcnd3,Grin3a,Aqp11,Hcn3,Slc1a2,Slc22a23,Slc36a4,Lasp1,Scn3a,Chrna4,Slc22a17,Atp2b3,Abcd1,Slc25a1,Xpr1,Sv2a,Clcn2,Slc39a6,Kcna3,Slc32a1,Slc6a7,Slc36a1,Sfxn3,Pitpnm3,Slc38a1,Slc7a14,Unc80,Ano10,Slc35e2,Clcn5,Kcnj6,Slc4a8,Cplx1,Kcnc4,Lrrc55,Kcna2,Slc25a17,Cnnm4,Atp11a,P2rx3,Slc6a1,Slc39a9,Slc7a5,Slc7a11,Tmem38a,Cacng5,Lrrc8c,Clcn6,Xkr4,Cacna1b,Cachd1,Slc23a2,Slc4a3,Nalf1,Slc6a8,Slc30a7,Lrrc8b,Gjd2,C…	FALSE	18.3895
53	query_1	TRUE	1.46039e-05	472	980	79	0.0806122	0.167373	GO:0015075	GO:MF	monoatomic ion transmembrane transporter activity	12095	2262	GO:0022857	ISO IBA IEA,IDA IPI IMP ISO IBA IEA,IDA ISO IBA IEA,IDA ISO IBA IEA,ISS ISO,ISO TAS IEA,IDA IMP IGI ISO IBA TAS IEA,ISO IBA IEA,IMP ISS ISO IBA IEA,ISS ISO IBA IEA,ISO IBA IEA,IDA ISS ISO IEA,ISS ISO IEA,IDA ISO IBA IEA,IEA,ISS ISO IEA,IBA,ISO IBA IEA,ISO IBA IEA,IEA,IDA ISO IBA IEA,ISO IBA IEA,ISO IBA IEA,IDA ISS ISO IBA IEA,IDA IBA,IGI ISS ISO IBA TAS IEA,IDA ISO IEA,ISS ISO IEA,IDA TAS IEA,IBA…	Kcnd3,Grin3a,Hcn3,Slc1a2,Lasp1,Scn3a,Chrna4,Atp2b3,Clcn2,Slc39a6,Kcna3,Slc32a1,Slc6a7,Slc36a1,Sfxn3,Slc38a1,Unc80,Ano10,Clcn5,Kcnj6,Slc4a8,Kcnc4,Lrrc55,Kcna2,Cnnm4,P2rx3,Slc6a1,Slc39a9,Tmem38a,Cacng5,Lrrc8c,Clcn6,Cacna1b,Cachd1,Slc23a2,Slc4a3,Nalf1,Slc6a8,Slc30a7,Lrrc8b,Clcn3,Kcnc2,Kcnab2,Tmem266,Gabrg3,Gabrq,Slc12a5,Psen1,Gabrb1,Slc6a9,Slc24a2,Slc5a5,Grin2d,Sfxn5,Slc2a13,Ano4,Atp6v0e2,Slc4a10,Ch…	FALSE	11.1342
54	query_1	TRUE	0.000169559	436	980	72	0.0734694	0.165138	GO:0015318	GO:MF	inorganic molecular entity transmembrane transporter activity	12095	2438	GO:0022857	ISO IBA IEA,IDA IPI IMP ISO IEA,IDA ISO IEA,IDA ISO IBA IEA,IDA ISO IBA IEA,ISO TAS IEA,ISO IBA IEA,IMP ISS ISO IBA IEA,ISS ISO IBA IEA,ISO IBA IEA,IDA ISS ISO IEA,ISS ISO IEA,IDA ISO IBA IEA,ISS ISO IEA,IBA IEA,ISO IBA IEA,IEA,IDA ISO IBA IEA,IBA IEA,ISO IBA IEA,IDA ISS ISO IBA IEA,IDA IBA,IDA ISO IEA,ISS ISO IEA,IDA TAS IEA,IBA,ISS ISO IBA IEA,IDA IMP ISO IBA IEA,IBA,IMP ISO IEA,IDA ISO IEA,IBA…	Kcnd3,Grin3a,Aqp11,Hcn3,Slc1a2,Scn3a,Atp2b3,Clcn2,Slc39a6,Kcna3,Slc32a1,Slc6a7,Slc36a1,Slc38a1,Ano10,Clcn5,Kcnj6,Slc4a8,Kcnc4,Lrrc55,Kcna2,Cnnm4,Slc6a1,Slc39a9,Tmem38a,Cacng5,Clcn6,Cacna1b,Cachd1,Slc23a2,Slc4a3,Nalf1,Slc6a8,Slc30a7,Clcn3,Kcnc2,Kcnab2,Gabrg3,Gabrq,Slc12a5,Psen1,Gabrb1,Slc6a9,Slc24a2,Slc5a5,Grin2d,Slc2a13,Ano4,Atp6v0e2,Aqp4,Slc4a10,Cacnb1,Cacng2,Slc24a4,Slc39a7,Atp1b2,Slc9a1,Slc8a2…	FALSE	8.68231
55	query_1	TRUE	0.0005234	296	980	54	0.055102	0.182432	GO:0046873	GO:MF	metal ion transmembrane transporter activity	12095	5731	c(\GO:0008324\", \"GO:0022890\")"	ISO IBA IEA,IDA IMP,IDA ISO IBA IEA,IDA ISO IBA IEA,ISO TAS IEA,ISO IBA IEA,ISS ISO IBA IEA,ISO IBA IEA,ISS ISO IEA,ISS ISO IEA,IEA,IDA ISO IBA IEA,IBA IEA,ISO IBA IEA,IDA ISS ISO IBA IEA,IDA IBA,IDA ISO IEA,ISS ISO IEA,IDA TAS IEA,IBA,IDA IMP ISO IBA IEA,IBA,IMP ISO IEA,IBA,IDA ISO IBA IEA,IDA ISO IBA IEA,ISS ISO IBA IEA,IEA,IMP ISS ISO IBA IEA,ISO IEA,IDA ISO IBA IEA,IDA ISO IBA IEA,IEA,ISS ISO…	Kcnd3,Grin3a,Hcn3,Slc1a2,Scn3a,Atp2b3,Slc39a6,Kcna3,Slc6a7,Slc38a1,Kcnj6,Slc4a8,Kcnc4,Lrrc55,Kcna2,Cnnm4,Slc6a1,Slc39a9,Tmem38a,Cacng5,Cacna1b,Cachd1,Slc23a2,Nalf1,Slc6a8,Slc30a7,Kcnc2,Kcnab2,Slc12a5,Psen1,Slc6a9,Slc24a2,Slc5a5,Grin2d,Slc4a10,Cacnb1,Cacng2,Slc24a4,Slc39a7,Atp1b2,Slc9a1,Slc8a2,Kcnq3,Kcnb1,Hcn2,Slc30a4,Kcnc3,Mrs2,Nipal3,Rasa3,Kcnh7,Grin2a,Slc12a4,Kcna6	FALSE	7.55516
56	query_1	TRUE	0.00318658	295	980	52	0.0530612	0.176271	GO:0015267	GO:MF	channel activity	12095	2408	GO:0022803	ISO IBA IEA,IDA IPI IMP ISO IBA IEA,IDA ISS ISO IBA IEA,IDA ISO IBA IEA,ISO TAS IEA,IDA IMP IGI ISO IBA TAS IEA,IMP ISS ISO IBA IEA,ISO IBA IEA,IBA,ISO IBA IEA,ISO IBA IEA,IEA,ISO IBA IEA,ISO IBA IEA,IDA ISS ISO IBA IEA,IGI ISS ISO IBA TAS IEA,IDA TAS IEA,IBA,IMP ISS ISO IEA,ISS ISO IEA,IDA IMP ISO IBA IEA,IBA,IBA,ISS ISO IEA,IBA,ISS ISO IBA IEA,ISS ISO IBA IEA,IEA,IEA,IDA IMP ISO IBA IEA,IBA IEA…	Kcnd3,Grin3a,Aqp11,Hcn3,Scn3a,Chrna4,Clcn2,Kcna3,Unc80,Ano10,Clcn5,Kcnj6,Kcnc4,Lrrc55,Kcna2,P2rx3,Tmem38a,Cacng5,Lrrc8c,Clcn6,Cacna1b,Cachd1,Nalf1,Lrrc8b,Gjd2,Clcn3,Kcnc2,Kcnab2,Tmem266,Gabrg3,Gabrq,Slc12a5,Psen1,Gabrb1,Slc24a2,Grin2d,Tomm40l,Ano4,Aqp4,Chrna7,Cacnb1,Cacng2,Slc24a4,Gria1,Kcnq3,Kcnb1,Hcn2,Kcnc3,Rasa3,Kcnh7,Grin2a,Kcna6	FALSE	5.74881
57	query_1	TRUE	0.00318658	295	980	52	0.0530612	0.176271	GO:0022803	GO:MF	passive transmembrane transporter activity	12095	3541	GO:0022857	ISO IBA IEA,IDA IPI IMP ISO IBA IEA,IDA ISS ISO IBA IEA,IDA ISO IBA IEA,ISO TAS IEA,IDA IMP IGI ISO IBA TAS IEA,IMP ISS ISO IBA IEA,ISO IBA IEA,IBA,ISO IBA IEA,ISO IBA IEA,IEA,ISO IBA IEA,ISO IBA IEA,IDA ISS ISO IBA IEA,IGI ISS ISO IBA TAS IEA,IDA TAS IEA,IBA,IMP ISS ISO IEA,ISS ISO IEA,IDA IMP ISO IBA IEA,IBA,IBA,ISS ISO IEA,IBA,ISS ISO IBA IEA,ISS ISO IBA IEA,IEA,IEA,IDA IMP ISO IBA IEA,IBA IEA…	Kcnd3,Grin3a,Aqp11,Hcn3,Scn3a,Chrna4,Clcn2,Kcna3,Unc80,Ano10,Clcn5,Kcnj6,Kcnc4,Lrrc55,Kcna2,P2rx3,Tmem38a,Cacng5,Lrrc8c,Clcn6,Cacna1b,Cachd1,Nalf1,Lrrc8b,Gjd2,Clcn3,Kcnc2,Kcnab2,Tmem266,Gabrg3,Gabrq,Slc12a5,Psen1,Gabrb1,Slc24a2,Grin2d,Tomm40l,Ano4,Aqp4,Chrna7,Cacnb1,Cacng2,Slc24a4,Gria1,Kcnq3,Kcnb1,Hcn2,Kcnc3,Rasa3,Kcnh7,Grin2a,Kcna6	FALSE	5.74881
58	query_1	TRUE	0.00427656	391	980	63	0.0642857	0.161125	GO:0008324	GO:MF	monoatomic cation transmembrane transporter activity	12095	1637	GO:0015075	ISO IBA IEA,IDA IMP,IDA ISO IBA IEA,IDA ISO IBA IEA,ISO TAS IEA,IMP IGI ISO IBA TAS IEA,ISO IBA IEA,ISS ISO IBA IEA,ISO IBA IEA,IDA ISS ISO IEA,ISS ISO IEA,IDA ISO IBA IEA,ISS ISO IEA,IBA,ISO IEA,IEA,IDA ISO IBA IEA,IBA IEA,ISO IBA IEA,IDA ISS ISO IBA IEA,IDA IBA,IGI ISS ISO IBA TAS IEA,IDA ISO IEA,ISS ISO IEA,IDA TAS IEA,IBA,IDA IMP ISO IBA IEA,IBA,IMP ISO IEA,IBA,IDA ISO IBA IEA,IDA ISO IBA IEA…	Kcnd3,Grin3a,Hcn3,Slc1a2,Scn3a,Chrna4,Atp2b3,Slc39a6,Kcna3,Slc32a1,Slc6a7,Slc36a1,Slc38a1,Unc80,Ano10,Kcnj6,Slc4a8,Kcnc4,Lrrc55,Kcna2,Cnnm4,P2rx3,Slc6a1,Slc39a9,Tmem38a,Cacng5,Cacna1b,Cachd1,Slc23a2,Nalf1,Slc6a8,Slc30a7,Kcnc2,Kcnab2,Slc12a5,Psen1,Slc6a9,Slc24a2,Slc5a5,Grin2d,Slc2a13,Atp6v0e2,Slc4a10,Chrna7,Cacnb1,Cacng2,Slc24a4,Slc39a7,Atp1b2,Slc9a1,Slc8a2,Kcnq3,Kcnb1,Hcn2,Slc30a4,Kcnc3,Mrs2,Nipa…	FALSE	5.45461
59	query_1	TRUE	0.0159557	370	980	59	0.0602041	0.159459	GO:0022890	GO:MF	inorganic cation transmembrane transporter activity	12095	3588	GO:0015318	ISO IBA IEA,IDA IPI IMP ISO IEA,IDA ISO IBA IEA,IDA ISO IBA IEA,ISO TAS IEA,ISO IBA IEA,ISS ISO IBA IEA,ISO IBA IEA,IDA ISS ISO IEA,ISS ISO IEA,IDA ISO IBA IEA,ISS ISO IEA,IEA,IDA ISO IBA IEA,IBA IEA,ISO IBA IEA,IDA ISS ISO IBA IEA,IDA IBA,IDA ISO IEA,ISS ISO IEA,IDA TAS IEA,IBA,IDA IMP ISO IBA IEA,IBA,IMP ISO IEA,IBA,IDA ISO IBA IEA,IDA ISO IBA IEA,ISS ISO IBA IEA,IEA,IMP ISS ISO IBA IEA,ISO IEA…	Kcnd3,Grin3a,Hcn3,Slc1a2,Scn3a,Atp2b3,Slc39a6,Kcna3,Slc32a1,Slc6a7,Slc36a1,Slc38a1,Kcnj6,Slc4a8,Kcnc4,Lrrc55,Kcna2,Cnnm4,Slc6a1,Slc39a9,Tmem38a,Cacng5,Cacna1b,Cachd1,Slc23a2,Nalf1,Slc6a8,Slc30a7,Kcnc2,Kcnab2,Slc12a5,Psen1,Slc6a9,Slc24a2,Slc5a5,Grin2d,Slc2a13,Atp6v0e2,Slc4a10,Cacnb1,Cacng2,Slc24a4,Slc39a7,Atp1b2,Slc9a1,Slc8a2,Gria1,Kcnq3,Kcnb1,Hcn2,Slc30a4,Kcnc3,Mrs2,Nipal3,Rasa3,Kcnh7,Grin2a,Slc1…	FALSE	4.13794
60	query_1	TRUE	0.0193226	205	980	39	0.0397959	0.190244	GO:0022836	GO:MF	gated channel activity	12095	3554	GO:0015267	ISO IBA IEA,IDA IPI IMP ISO IBA IEA,IDA ISO IBA IEA,IMP IGI ISO IBA TAS IEA,IMP ISS ISO IBA IEA,ISO IBA IEA,ISO IEA,ISO IBA IEA,IEA,ISO IBA IEA,ISO IBA IEA,IDA ISS ISO IBA IEA,IGI ISS ISO IBA TAS IEA,TAS,IBA,ISS ISO IEA,IDA IMP ISO IBA IEA,IBA,IBA,ISS ISO IBA IEA,ISS ISO IBA IEA,IEA,IEA,IDA IMP IBA IEA,IEA,ISS ISO IEA,IDA IMP ISS ISO IBA IEA,IDA IMP ISO IBA IEA,IDA IMP IGI ISO IBA IEA,IMP IBA IEA…	Kcnd3,Grin3a,Hcn3,Chrna4,Clcn2,Kcna3,Ano10,Clcn5,Kcnj6,Kcnc4,Lrrc55,Kcna2,P2rx3,Tmem38a,Cacng5,Clcn6,Cacna1b,Cachd1,Nalf1,Clcn3,Kcnc2,Kcnab2,Tmem266,Gabrg3,Gabrq,Gabrb1,Grin2d,Chrna7,Cacnb1,Cacng2,Gria1,Kcnq3,Kcnb1,Hcn2,Kcnc3,Rasa3,Kcnh7,Grin2a,Kcna6	FALSE	3.94648
61	query_1	TRUE	0.022046	96	980	24	0.0244898	0.25	GO:0030165	GO:MF	PDZ domain binding	12095	3618	GO:0019904	ISO IEA,IPI,ISO IBA,IPI,ISO,IPI,ISO IEA,ISO,ISS ISO IEA,ISO IEA,IEA,ISO IEA,ISO,ISO IEA,ISO IEA,ISO,ISS ISO,ISO,IDA,ISO IEA,ISO,ISO,ISS ISO,ISO	Gng12,Shisa6,Atp2b3,Cntnap2,Lin7c,Shisa9,Crim1,Erc2,Clcn3,Fzd4,Cit,Sstr2,Slc22a21,Psen1,Fzd3,Lin7a,Cxadr,Apba1,Cntnap4,Gria1,Hcn2,Gipc1,Pten,Ctbp1	TRUE	3.81462
62	query_1	TRUE	0.0225941	445	980	67	0.0683673	0.150562	GO:0038023	GO:MF	signaling receptor activity	12095	5035	GO:0060089	IDA IPI IMP ISO IBA IEA,IMP ISS ISO IBA TAS IEA,IMP ISS ISO IBA IEA,ISO IEA,IDA IMP IGI ISO IBA TAS IEA,IDA IMP IGI ISO IBA IEA,IDA ISO IBA IEA,IMP,ISS IBA IEA,IEA,ISO IEA,IDA IMP ISS ISO IEA,ISO IEA,IMP,IDA IBA IEA,ISS ISO IEA,ISS ISO IEA,IEA,IBA NAS IEA,IDA ISO,IEA,ISO IBA IEA,IDA ISO IBA IEA,ISO,ISS ISO IBA IEA,IDA ISS ISO IBA IEA,IPI IGI ISO IBA IEA,IBA,IBA,IEA,IDA IMP ISO IBA IEA,IEA,IDA ISO…	Grin3a,Thrb,Cnr1,Pde3a,Chrna4,Egfr,Ntrk2,Slc22a17,Gpr45,Chml,Amfr,Gpr158,Sqstm1,Sema6a,Unc5c,P2rx3,Slc39a9,Ogfrl1,Esrrg,Nrxn1,Adgra1,Htr5a,Ngfr,Igsf1,Gpr26,Kit,Fzd4,Dcbld2,Nid1,Adra1b,Gabrg3,Adgra2,Ret,Gabrq,Ramp3,Alk,Sstr2,Npr2,Gabrb1,Grin2d,Mchr1,Cntfr,Ddr2,Fzd3,Nectin1,Cd47,Chrna7,Nlgn3,Tshr,Gabbr2,Erbb4,Unc5d,Vldlr,Atrn,Amot,Gpr135,Gria1,Rgmb,Adra1a,Chrm3,Gpr176,Notch3,Grin2a,Nrxn2,Paqr3,Neo1…	TRUE	3.79007
63	query_1	TRUE	0.0225941	445	980	67	0.0683673	0.150562	GO:0060089	GO:MF	molecular transducer activity	12095	7796	GO:0003674	IDA IPI IMP ISO IBA IEA,IMP ISS ISO IBA TAS IEA,IMP ISS ISO IBA IEA,ISO IEA,IDA IMP IGI ISO IBA TAS IEA,IDA IMP IGI ISO IBA IEA,IDA ISO IBA IEA,IMP,ISS IBA IEA,IEA,ISO IEA,IDA IMP ISS ISO IEA,ISO IEA,IMP,IDA IBA IEA,ISS ISO IEA,ISS ISO IEA,IEA,IBA NAS IEA,IDA ISO,IEA,ISO IBA IEA,IDA ISO IBA IEA,ISO,ISS ISO IBA IEA,IDA ISS ISO IBA IEA,IPI IGI ISO IBA IEA,IBA,IBA,IEA,IDA IMP ISO IBA IEA,IEA,IDA ISO…	Grin3a,Thrb,Cnr1,Pde3a,Chrna4,Egfr,Ntrk2,Slc22a17,Gpr45,Chml,Amfr,Gpr158,Sqstm1,Sema6a,Unc5c,P2rx3,Slc39a9,Ogfrl1,Esrrg,Nrxn1,Adgra1,Htr5a,Ngfr,Igsf1,Gpr26,Kit,Fzd4,Dcbld2,Nid1,Adra1b,Gabrg3,Adgra2,Ret,Gabrq,Ramp3,Alk,Sstr2,Npr2,Gabrb1,Grin2d,Mchr1,Cntfr,Ddr2,Fzd3,Nectin1,Cd47,Chrna7,Nlgn3,Tshr,Gabbr2,Erbb4,Unc5d,Vldlr,Atrn,Amot,Gpr135,Gria1,Rgmb,Adra1a,Chrm3,Gpr176,Notch3,Grin2a,Nrxn2,Paqr3,Neo1…	FALSE	3.79007
64	query_1	TRUE	0.0241415	168	980	34	0.0346939	0.202381	GO:0008514	GO:MF	organic anion transmembrane transporter activity	12095	1748	GO:0022857	IPI IMP ISO IEA,IDA IMP ISO IBA IEA,IEA,ISS ISO IBA IEA,ISS ISO IBA IEA,IBA,IDA ISS ISO IBA IEA,IDA ISS ISO IBA IEA,IDA ISO IBA IEA,ISS IEA,IDA ISS ISO IBA IEA,IDA,IDA ISO IBA IEA,ISS ISO IBA IEA,IDA IMP ISO IEA,IDA ISS ISO IBA IEA,ISS ISO IBA IEA,IDA IMP ISO IEA,IDA ISO IEA,IDA ISO IBA IEA,IDA IMP ISO IBA IEA,IDA IMP ISS ISO IBA IEA,ISO IBA,IBA,IDA ISO IBA IEA,IBA,ISS ISO IBA IEA,IDA ISS ISO IBA…	Grin3a,Slc1a2,Slc36a4,Abcd1,Slc25a1,Slc39a6,Slc32a1,Slc6a7,Slc36a1,Sfxn3,Slc38a1,Slc7a14,Slc4a8,Slc25a17,Slc6a1,Slc7a5,Slc7a11,Slc23a2,Slc4a3,Slc6a8,Slc6a9,Grin2d,Sfxn5,Slc25a16,Slc4a10,Abcd2,Slc25a23,Gria1,Slc7a3,Slc16a14,Slc35b4,Slc3a2,Grin2a,Slco1c1	FALSE	3.72382
65	query_1	TRUE	0.0293933	177	980	35	0.0357143	0.19774	GO:0015291	GO:MF	secondary active transmembrane transporter activity	12095	2421	GO:0022804	IDA ISO IBA IEA,ISS ISO IBA IEA,IBA,IDA ISS ISO IEA,ISS ISO IEA,IDA ISO IBA IEA,ISS ISO IEA,IBA,IEA,IDA ISO IBA IEA,IEA,IDA ISO IEA,ISS ISO IEA,ISS ISO IEA,IEA,IMP ISO IEA,IDA ISO IEA,IDA ISO IBA IEA,IDA TAS IEA,IMP ISS ISO IBA IEA,IDA ISO IBA IEA,ISO IBA IEA,IEA,ISO IBA IEA,ISO,IDA ISO IBA IEA,IDA ISO ISA IBA IEA,IDA IMP ISO IBA IEA,IMP ISO IBA IEA,ISS ISO IEA,IEA,IEA,ISO IEA,ISO IBA IEA,IDA ISO…	Slc1a2,Slc25a1,Slc39a6,Slc32a1,Slc6a7,Slc36a1,Slc38a1,Slc35e2,Clcn5,Slc4a8,Slc25a17,Slc6a1,Slc7a5,Slc7a11,Clcn6,Slc23a2,Slc4a3,Slc6a8,Clcn3,Slc12a5,Slc6a9,Slc24a2,Slc5a5,Slc2a13,Slc25a16,Slc4a10,Slc24a4,Slc9a1,Slc8a2,Slc25a23,Slc30a4,Slc16a14,Slc3a2,Slco1c1,Slc12a4	TRUE	3.52699
66	query_1	TRUE	0.0343584	126	980	28	0.0285714	0.222222	GO:0022832	GO:MF	voltage-gated channel activity	12095	3551	GO:0022836	ISO IBA IEA,IPI IMP ISO IEA,IDA ISO IBA IEA,IMP ISS ISO IBA IEA,ISO IBA IEA,ISO IBA IEA,IEA,ISO IBA IEA,ISO IBA IEA,IDA ISS ISO IBA IEA,IBA,ISS ISO IEA,IDA IMP ISO IBA IEA,IBA,ISS ISO IBA IEA,ISS ISO IBA IEA,IEA,IEA,IDA IMP ISO IBA IEA,IDA IMP IGI ISO IBA IEA,IMP IBA IEA,IGI ISS ISO IBA IEA,IDA IMP ISS ISO IBA IEA,ISS ISO IBA IEA,ISS ISO IBA IEA,ISO IBA IEA,IMP IGI ISS ISO IBA IEA,ISS ISO IBA IEA	Kcnd3,Grin3a,Hcn3,Clcn2,Kcna3,Clcn5,Kcnj6,Kcnc4,Lrrc55,Kcna2,Cacng5,Clcn6,Cacna1b,Cachd1,Clcn3,Kcnc2,Kcnab2,Tmem266,Grin2d,Cacnb1,Cacng2,Kcnq3,Kcnb1,Hcn2,Kcnc3,Kcnh7,Grin2a,Kcna6	FALSE	3.37091
67	query_1	TRUE	0.0387098	276	980	47	0.0479592	0.17029	GO:0005216	GO:MF	monoatomic ion channel activity	12095	1336	c(\GO:0015075\", \"GO:0015267\")"	ISO IBA IEA,IDA IPI IMP ISO IBA IEA,IDA ISO IBA IEA,ISO TAS IEA,IDA IMP IGI ISO IBA TAS IEA,IMP ISS ISO IBA IEA,ISO IBA IEA,IBA,ISO IBA IEA,ISO IBA IEA,IEA,ISO IBA IEA,ISO IBA IEA,IDA ISS ISO IBA IEA,IGI ISS ISO IBA TAS IEA,IDA TAS IEA,IBA,IMP ISS ISO IEA,ISS ISO IEA,IDA IMP ISO IBA IEA,IBA,IBA,ISS ISO IEA,ISS ISO IBA IEA,ISS ISO IBA IEA,IEA,IEA,IDA IMP ISO IBA IEA,IBA IEA,ISO IEA,ISS ISO IBA IEA…	Kcnd3,Grin3a,Hcn3,Scn3a,Chrna4,Clcn2,Kcna3,Unc80,Ano10,Clcn5,Kcnj6,Kcnc4,Lrrc55,Kcna2,P2rx3,Tmem38a,Cacng5,Lrrc8c,Clcn6,Cacna1b,Cachd1,Nalf1,Lrrc8b,Clcn3,Kcnc2,Kcnab2,Tmem266,Gabrg3,Gabrq,Psen1,Gabrb1,Slc24a2,Grin2d,Ano4,Chrna7,Cacnb1,Cacng2,Slc24a4,Gria1,Kcnq3,Kcnb1,Hcn2,Kcnc3,Rasa3,Kcnh7,Grin2a,Kcna6	FALSE	3.25166
68	query_1	TRUE	0.0274889	73	432	20	0.0462963	0.273973	KEGG:04727	KEGG	GABAergic synapse	5427	357	KEGG:00000	KEGG,KEGG,KEGG,KEGG,KEGG,KEGG,KEGG,KEGG,KEGG,KEGG,KEGG,KEGG,KEGG,KEGG,KEGG,KEGG,KEGG,KEGG,KEGG,KEGG	Abat,Gng12,Adcy1,Slc32a1,Gad1,Slc38a1,Kcnj6,Gad2,Slc6a1,Cacna1b,Gnao1,Prkacb,Adcy9,Gabrg3,Gabrq,Slc12a5,Gabrb1,Gnai2,Gabbr2,Gng4	FALSE	3.59397
69	query_1	TRUE	2.79942e-08	262	485	58	0.119588	0.221374	REAC:R-MMU-112316	REAC	Neuronal System	5937	956	REAC:0000000	REAC,REAC,REAC,REAC,REAC,REAC,REAC,REAC,REAC,REAC,REAC,REAC,REAC,REAC,REAC,REAC,REAC,REAC,REAC,REAC,REAC,REAC,REAC,REAC,REAC,REAC,REAC,REAC,REAC,REAC,REAC,REAC,REAC,REAC,REAC,REAC,REAC,REAC,REAC,REAC,REAC,REAC,REAC,REAC,REAC,REAC,REAC,REAC,REAC,REAC,REAC,REAC,REAC,REAC,REAC,REAC,REAC,REAC	Kcnd3,Grin3a,Abat,Epb41l3,Gng12,Hcn3,Syt1,Slc1a2,Chrna4,Adcy1,Kcna3,Slc32a1,Aldh2,Lin7c,Gad1,Slc38a1,Syn2,Cplx1,Gad2,Kcnc4,Kcna2,Slc6a1,Homer2,Nrxn1,Cacna1b,Prkacb,Gjd2,Adcy9,Syn3,Kcnc2,Kcnab2,Gabrg3,Lrrtm2,Gabrq,Gabrb1,Grin2d,Dnajc5,Gnai2,Ppfia4,Lin7a,Chrna7,Cacnb1,Nlgn3,Gabbr2,Flot1,Cacng2,Gng4,Apba1,Slitrk5,Gria1,Kcnb1,Hcn2,Kcnc3,Epb41l2,Kcnh7,Grin2a,Nrxn2,Kcna6	FALSE	17.3913
70	query_1	TRUE	0.000821496	162	485	36	0.0742268	0.222222	REAC:R-MMU-112315	REAC	Transmission across Chemical Synapses	5937	1669	REAC:R-MMU-112316	REAC,REAC,REAC,REAC,REAC,REAC,REAC,REAC,REAC,REAC,REAC,REAC,REAC,REAC,REAC,REAC,REAC,REAC,REAC,REAC,REAC,REAC,REAC,REAC,REAC,REAC,REAC,REAC,REAC,REAC,REAC,REAC,REAC,REAC,REAC,REAC	Grin3a,Abat,Gng12,Syt1,Slc1a2,Chrna4,Adcy1,Slc32a1,Aldh2,Lin7c,Gad1,Slc38a1,Syn2,Cplx1,Gad2,Slc6a1,Cacna1b,Prkacb,Adcy9,Syn3,Gabrg3,Gabrq,Gabrb1,Grin2d,Dnajc5,Gnai2,Ppfia4,Lin7a,Chrna7,Cacnb1,Gabbr2,Cacng2,Gng4,Apba1,Gria1,Grin2a	FALSE	7.10438
71	query_1	TRUE	0.0168122	41	485	15	0.0309278	0.365854	REAC:R-MMU-112310	REAC	Neurotransmitter release cycle	5937	960	REAC:R-MMU-112315	REAC,REAC,REAC,REAC,REAC,REAC,REAC,REAC,REAC,REAC,REAC,REAC,REAC,REAC,REAC	Abat,Syt1,Slc1a2,Slc32a1,Lin7c,Gad1,Syn2,Cplx1,Gad2,Slc6a1,Syn3,Dnajc5,Ppfia4,Lin7a,Apba1	FALSE	4.08565

## Sheet: limma_LMfit_noChd8
	logFC	AveExpr	t	P.Value	adj.P.Val	B
Tmem230	3.7186	4.2239	9.64808	2.99235e-13	3.43542e-09	19.2979
Ankrd29	-6.63406	4.02724	-9.56161	4.06174e-13	3.43542e-09	19.0477
Cplx2	-3.74743	8.42408	-8.98421	3.18701e-12	1.79705e-08	17.5114
Sae1	2.07386	7.17051	8.66185	1.02057e-11	4.31598e-08	16.3972
Polr3g	6.41796	2.55433	8.48977	1.90644e-11	5.37489e-08	14.3065
Fam214b	3.32986	5.38858	8.53561	1.61376e-11	5.37489e-08	15.8938
Thbs1	-5.31544	3.87535	-8.35009	3.17123e-11	7.66351e-08	15.056
4931428F04Rik	2.40756	7.00303	8.04803	9.57584e-11	2.02481e-07	14.275
Sfrp1	-3.19759	5.93173	-7.88997	1.71117e-10	3.21623e-07	13.7095
Dnmt3a	-3.07866	8.3264	-7.67891	3.72211e-10	6.29632e-07	12.9947
Aqp11	-4.35817	4.03757	-7.58592	5.24502e-10	8.06589e-07	12.4995
Grin3a	-2.82811	5.6677	-7.51766	6.74802e-10	9.51246e-07	12.4057
Tab2	-2.79798	6.00126	-7.43793	9.0589e-10	1.17877e-06	12.1338
Cnr1	-3.295	8.04382	-7.38691	1.09388e-09	1.32172e-06	11.9685
1700037H04Rik	2.43483	6.23874	7.22619	1.98186e-09	2.23501e-06	11.3918
Trp53inp2	-5.49531	7.81711	-7.19898	2.19175e-09	2.31723e-06	11.3063
Pim2	2.06302	5.29396	7.00193	4.54445e-09	4.522e-06	10.5834
Snap29	2.85654	6.12743	6.97195	5.07765e-09	4.77186e-06	10.4971
Rab2b	-2.8904	3.32164	-6.844	8.15274e-09	7.25852e-06	9.8009
Nat8l	2.74348	6.89575	6.77822	1.03987e-08	8.79521e-06	9.82103
Rcan3	-3.35998	6.83705	-6.7446	1.17756e-08	9.4855e-06	9.70322
Hipk2	-4.38057	5.15921	-6.70637	1.35641e-08	1.04296e-05	9.55208
Xpc	2.32659	4.22047	6.68557	1.4648e-08	1.07733e-05	9.40662
Miga1	3.1675	6.28895	6.66299	1.59237e-08	1.12235e-05	9.4131
Itgb1	2.81867	6.87431	6.60675	1.96018e-08	1.18423e-05	9.21797
Fam210b	-3.49438	5.24046	-6.62295	1.84631e-08	1.18423e-05	9.2564
Maneal	-2.18788	5.87028	-6.61515	1.90029e-08	1.18423e-05	9.24409
Rpl7l1	2.00433	5.76744	6.6189	1.87418e-08	1.18423e-05	9.25468
Syt13	-3.02781	5.7001	-6.49459	2.96605e-08	1.73013e-05	8.82044
Lactb	2.40307	3.8086	6.47042	3.24285e-08	1.82853e-05	8.6143
Arfgef3	-5.16019	6.67958	-6.44505	3.56097e-08	1.93031e-05	8.65023
Sox1ot	-3.50349	4.82246	-6.43824	3.65157e-08	1.93031e-05	8.60853
AI504432	-4.55986	5.48989	-6.39317	4.31176e-08	2.21023e-05	8.46392
Ncoa1	-2.80921	6.134	-6.36877	4.71756e-08	2.33242e-05	8.38146
Kcnd3	-2.62093	6.55379	-6.36261	4.82588e-08	2.33242e-05	8.36084
Ei24	-2.14476	6.88112	-6.30714	5.91969e-08	2.7816e-05	8.16666
Zeb1	-2.73317	4.64453	-6.27669	6.62197e-08	2.91571e-05	8.0421
Tlcd3a	2.80254	3.84133	6.2726	6.72219e-08	2.91571e-05	7.9465
Tmem250-ps	2.19211	4.71417	6.27412	6.68475e-08	2.91571e-05	8.02831
Ctnnd2	-2.71382	7.81135	-6.25884	7.07142e-08	2.9905e-05	7.99765
Egfr	-5.18785	3.71407	-6.21574	8.28608e-08	3.26874e-05	7.76739
Thrb	-3.35992	5.24729	-6.21498	8.30904e-08	3.26874e-05	7.83979
Scn2b	1.90209	6.60285	6.22054	8.14089e-08	3.26874e-05	7.86353
Pabpc4	-2.10035	5.42874	-6.19641	8.89619e-08	3.42018e-05	7.77673
Pole3	2.99892	4.44367	6.15778	1.02523e-07	3.85397e-05	7.61278
Spock2	-2.49536	9.16361	-6.11899	1.18215e-07	4.34724e-05	7.50786
Rragd	2.67522	6.75222	6.08365	1.34577e-07	4.84363e-05	7.38565
Myh8	-6.70062	3.47984	-6.07417	1.39336e-07	4.91042e-05	7.25987
Ppt2	2.55465	3.5055	6.0591	1.47249e-07	5.08341e-05	7.17876
Rimoc1	-2.77634	6.50365	-6.05207	1.51091e-07	5.11173e-05	7.27563
Fktn	1.99956	6.20022	6.04159	1.57003e-07	5.20758e-05	7.23952
Nudt16l1	2.2761	5.33964	6.01976	1.70073e-07	5.51912e-05	7.16243
Dnm3	-2.67513	6.94203	-6.01522	1.72921e-07	5.51912e-05	7.14697
Syt17	-3.29021	4.74915	-6.00353	1.80485e-07	5.65387e-05	7.10195
Igf1	-5.13049	6.10029	-5.9693	2.04561e-07	6.28622e-05	6.98817
Heg1	-4.02324	2.97426	-5.96461	2.08104e-07	6.28622e-05	6.81402
Cd99l2	-2.2086	7.25192	-5.93633	2.30768e-07	6.84855e-05	6.87214
Micall1	-3.26272	5.51389	-5.92222	2.42978e-07	7.08659e-05	6.82571
Xxylt1	-2.26482	4.99584	-5.8913	2.72015e-07	7.79898e-05	6.71749
Gpd2	-2.55242	6.338	-5.87283	2.90979e-07	8.20366e-05	6.65312
Tmed4	1.51994	5.69447	5.85312	3.12667e-07	8.67061e-05	6.58678
Abat	-2.67439	7.89158	-5.84298	3.24442e-07	8.85205e-05	6.54717
Ints14	-1.69357	4.67091	-5.8161	3.57819e-07	9.60771e-05	6.45523
Twnk	1.97095	4.21817	5.80567	3.71675e-07	9.69803e-05	6.40335
Gpr45	-2.5277	3.98988	-5.80495	3.72648e-07	9.69803e-05	6.39869
Tomm34	2.11788	5.46319	5.71107	5.24256e-07	0.000134368	6.09865
Hcn3	-2.25119	6.2274	-5.70298	5.39874e-07	0.000136306	6.06644
Aggf1	1.73401	5.91217	5.69139	5.63054e-07	0.000138038	6.0286
Arsb	-3.23723	3.76122	-5.69431	5.57121e-07	0.000138038	6.01067
G3bp1	1.39987	6.85985	5.686	5.74186e-07	0.000138756	6.00654
Cul4a	1.35728	6.28447	5.67798	5.91134e-07	0.000139253	5.98065
Ryk	2.71444	4.87309	5.67725	5.92704e-07	0.000139253	5.98267
Slc1a2	-3.10713	7.65075	-5.64936	6.55753e-07	0.000151955	5.87819
Tmtc4	2.21615	4.49914	5.63416	6.92855e-07	0.000158383	5.8317
Ddx25	1.50509	6.68643	5.61019	7.5565e-07	0.000168452	5.7462
Gng12	-2.63842	4.10524	-5.60977	7.5682e-07	0.000168452	5.74458
Gm2115	-6.36652	3.09854	-5.6043	7.71926e-07	0.000169583	5.65824
Pik3r4	2.42398	5.17818	5.5982	7.89161e-07	0.000171147	5.71362
Alg11	-2.25703	5.53658	-5.59181	8.07595e-07	0.000172928	5.68845
Phtf2	2.40545	5.38114	5.55701	9.15801e-07	0.000193646	5.57222
Mmd2	-3.03646	6.16692	-5.55006	9.39092e-07	0.00019612	5.54304
Manbal	-2.07426	5.2301	-5.5376	9.82295e-07	0.00020264	5.50572
Ptpn12	1.72592	5.46264	5.52403	1.03156e-06	0.00021024	5.45868
Iqsec3	-2.87618	6.66406	-5.49106	1.16171e-06	0.000233946	5.33788
Lztr1	1.53056	7.55882	5.48579	1.18399e-06	0.000235628	5.31728
Srxn1	-1.95234	5.53775	-5.48066	1.20607e-06	0.00023723	5.30932
Pde3a	-3.97657	4.0651	-5.47495	1.23111e-06	0.000239372	5.29148
Nab1	-3.03647	5.88693	-5.46215	1.28915e-06	0.000241379	5.24274
Mknk2	2.08004	6.35281	5.4571	1.31277e-06	0.000241379	5.22382
Clns1a	1.5627	6.03497	5.45894	1.30413e-06	0.000241379	5.23184
Cntnap2	-2.1295	7.68696	-5.45844	1.30647e-06	0.000241379	5.22306
Ntrk2	-2.77877	9.06487	-5.46037	1.29744e-06	0.000241379	5.22745
Xpr1	-2.45551	7.75989	-5.4205	1.49733e-06	0.000271791	5.09339
Dync1li2	1.58467	7.97039	5.4181	1.5103e-06	0.000271791	5.08503
Klhl21	2.28288	3.98068	5.41456	1.52962e-06	0.00027237	5.07968
Zbtb4	-2.12421	6.73056	-5.39121	1.66336e-06	0.000291126	4.99677
Eef1g	1.43485	7.75138	5.3902	1.66938e-06	0.000291126	4.99046
Abhd13	-1.65871	5.60894	-5.38395	1.70723e-06	0.000294689	4.98036
Syt1	-3.19347	9.95856	-5.36474	1.82892e-06	0.000312505	4.90083
Cntnap3	-2.78011	5.47638	-5.35955	1.86324e-06	0.000315185	4.89844
Nxph1	-2.14585	7.34752	-5.35626	1.88529e-06	0.000315759	4.87572
Wars2	-2.73729	2.56412	-5.33903	2.00526e-06	0.000332558	4.68883
Shisa6	-3.10848	4.06328	-5.32459	2.11161e-06	0.000346797	4.78908
Top2a	-7.97154	0.37954	-5.30638	2.25361e-06	0.000366558	3.49125
Steap2	-3.04084	3.32947	-5.30082	2.29883e-06	0.000366859	4.6787
Sumf1	2.46611	3.60945	5.30312	2.28001e-06	0.000366859	4.69046
Abcd1	-2.25172	4.09432	-5.27705	2.5025e-06	0.000395628	4.63102
Slc36a4	-2.4253	6.28545	-5.26841	2.58085e-06	0.000404238	4.58265
Cmtm6	2.98241	3.16136	5.25737	2.68447e-06	0.00041661	4.48933
Mapkapk2	1.89952	4.97047	5.25143	2.74192e-06	0.000421658	4.54329
Zfp862-ps	2.06259	4.8455	5.24759	2.7797e-06	0.000423616	4.53191
Chrna4	-3.10284	4.99093	-5.23209	2.93746e-06	0.000441433	4.47664
Nrn1	2.86915	5.73801	5.22853	2.9749e-06	0.000441433	4.45563
Kcna3	-4.77005	3.58821	-5.23036	2.95562e-06	0.000441433	4.46606
Bcat2	1.99429	4.44042	5.22379	3.02555e-06	0.000444368	4.45527
Zfp704	-2.68141	7.07963	-5.22139	3.05153e-06	0.000444368	4.41973
Suox	2.46514	4.61837	5.21937	3.07349e-06	0.000444368	4.44004
Pla2g12a	1.85645	4.48547	5.20554	3.22859e-06	0.000460904	4.39457
Tafa5	-1.85763	6.22608	-5.20434	3.24235e-06	0.000460904	4.3669
Acap2	-2.11314	6.09315	-5.1935	3.36976e-06	0.000475023	4.33141
Wnt5a	-4.28772	3.70799	-5.18816	3.43431e-06	0.000476187	4.33123
Scn3a	-2.22635	6.36379	-5.1895	3.41795e-06	0.000476187	4.31591
Rnf152	-3.31559	5.54978	-5.17409	3.61025e-06	0.000496512	4.27199
Eif5a2	2.72723	5.96729	5.15573	3.85328e-06	0.000525662	4.20806
Capzb	1.3456	7.76527	5.15007	3.93144e-06	0.000532034	4.17766
Mesd	1.83729	5.39303	5.13981	4.07705e-06	0.00054736	4.16341
Pitpnm3	-2.84116	5.15875	-5.11653	4.42754e-06	0.000589735	4.08734
Atp2b3	-1.98006	5.89167	-5.09865	4.71671e-06	0.000623342	4.01562
Ttc7b	-2.15703	6.49636	-5.06982	5.22246e-06	0.000684831	3.91408
Hadh	2.99991	3.22934	5.06446	5.32218e-06	0.000687252	3.88263
F2r	3.00728	3.71272	5.06475	5.31687e-06	0.000687252	3.91948
Samd4	-2.45338	5.06458	-5.0618	5.37249e-06	0.000688493	3.90678
Cfap410	2.04889	4.80716	5.05736	5.45736e-06	0.000694111	3.90035
Pttg1ip	1.50459	4.95211	5.05033	5.59437e-06	0.000706227	3.87378
Arf6	-1.96358	6.35993	-5.04776	5.64521e-06	0.00070673	3.84116
Rtl6	-1.96254	6.61495	-5.04592	5.68192e-06	0.00070673	3.83344
Vstm2a	-2.44771	7.11872	-5.02559	6.10401e-06	0.000753689	3.76282
Tmem134	2.10033	4.33317	5.02133	6.19624e-06	0.000758065	3.78818
Slc22a23	-2.21862	6.61049	-5.01911	6.24482e-06	0.000758065	3.7443
St6galnac5	3.10607	5.34308	5.01779	6.27389e-06	0.000758065	3.75978
Sprn	-3.02749	6.2926	-5.01437	6.35004e-06	0.000761824	3.7303
Kcnq2	1.69746	8.85834	5.00314	6.6059e-06	0.000786939	3.68288
Purg	-2.45114	5.10853	-4.99248	6.85823e-06	0.000811286	3.67546
Cyb561	1.47595	6.05217	4.96767	7.48263e-06	0.00086696	3.5789
Slc6a7	-2.67628	5.67778	-4.96896	7.4489e-06	0.00086696	3.58731
Alk	-3.68434	2.88569	-4.96873	7.45482e-06	0.00086696	3.57445
Mid2	-2.97002	5.31487	-4.95588	7.79883e-06	0.000894956	3.54958
Brpf3	-2.74074	4.4923	-4.95474	7.83007e-06	0.000894956	3.56481
Gad1	-2.3935	9.36975	-4.94321	8.15287e-06	0.000925597	3.48269
Nalf2	2.54916	4.3717	4.93553	8.37528e-06	0.000944508	3.50809
Minpp1	1.88867	5.30543	4.92624	8.65236e-06	0.000962916	3.45642
Dusp18	-1.99438	4.98337	-4.92726	8.62142e-06	0.000962916	3.46607
Marcksl1	-1.47635	9.51373	-4.91534	8.98869e-06	0.000993808	3.39012
Ocrl	-1.93198	6.14988	-4.91162	9.10669e-06	0.00100032	3.39132
Lamp5	-6.09438	2.3514	-4.90631	9.27732e-06	0.00101248	3.31528
Sfxn3	-2.10292	7.30513	-4.90424	9.34482e-06	0.00101331	3.35902
Pcdha2	-2.49696	3.43646	-4.89817	9.54515e-06	0.00102844	3.38316
Kcnj6	-4.30143	3.27009	-4.89563	9.63027e-06	0.00103105	3.36984
Tex261	1.60564	5.45091	4.88776	9.89855e-06	0.00105311	3.32592
Ahsa1	1.15389	6.61182	4.87849	1.02243e-05	0.00108096	3.27848
Synj1	-2.43853	8.11538	-4.87067	1.05072e-05	0.00110398	3.24482
Myl12b	1.33268	7.65797	4.85471	1.11087e-05	0.00115997	3.19444
P2rx3	-3.57152	2.51552	-4.83744	1.17975e-05	0.00120949	3.11568
Agpat1	-1.5162	7.0225	-4.83786	1.17802e-05	0.00120949	3.14142
Slc32a1	-3.36913	6.93482	-4.83876	1.17434e-05	0.00120949	3.14457
Sv2a	-1.50807	9.43113	-4.83085	1.20712e-05	0.0012301	3.11103
Knop1	-1.78361	5.75182	-4.82427	1.23507e-05	0.00125104	3.10995
Mccc1	1.81691	4.00544	4.82227	1.24368e-05	0.00125227	3.14459
Gne	-1.55353	5.12142	-4.81756	1.26422e-05	0.00126542	3.10081
Psmb2	1.49706	6.10334	4.80773	1.30818e-05	0.00130172	3.05092
Lama3	-3.75641	1.78664	-4.80555	1.31811e-05	0.00130392	2.8722
Rab31	2.44507	6.34339	4.79568	1.36406e-05	0.00134154	3.0093
Nop9	1.69546	4.6913	4.78765	1.40262e-05	0.00136146	3.0198
Plch2	-2.02777	5.84303	-4.78942	1.39407e-05	0.00136146	2.99296
Renbp	9.40923	-1.29683	4.78645	1.40847e-05	0.00136146	-0.23153
Scmh1	1.66999	5.63392	4.77341	1.47365e-05	0.0013849	2.94728
Psmc3	1.47806	7.22576	4.77608	1.46007e-05	0.0013849	2.93825
Cilk1	-1.70119	5.47263	-4.77425	1.46935e-05	0.0013849	2.95064
Alkbh8	-2.11242	5.22065	-4.77403	1.47049e-05	0.0013849	2.95684
Ybx3	1.79667	5.87615	4.77495	1.46582e-05	0.0013849	2.94755
Adamts16	-3.04169	2.01726	-4.77168	1.48252e-05	0.00138554	2.82648
Srl	2.05651	4.56758	4.75601	1.5652e-05	0.00145438	2.92191
Me3	-2.20456	4.06059	-4.75451	1.57337e-05	0.00145438	2.9243
Mtus1	2.46364	4.29437	4.74131	1.6469e-05	0.00151408	2.88162
Ndufs2	1.14231	7.60909	4.72989	1.71323e-05	0.00156543	2.78519
Nsun2	1.20629	6.35792	4.72308	1.75402e-05	0.00156543	2.77122
Dhfr	3.36632	2.04455	4.72416	1.74748e-05	0.00156543	2.62408
Mitd1	3.09639	2.19347	4.72398	1.74861e-05	0.00156543	2.66646
Ptma	-1.8951	7.56472	-4.72323	1.75313e-05	0.00156543	2.76322
Meak7	1.45307	4.67085	4.72238	1.75829e-05	0.00156543	2.80939
Pcdha3	-2.09921	4.02638	-4.71416	1.80892e-05	0.00160207	2.79595
Zfp975	4.25227	1.88267	4.70871	1.84327e-05	0.001624	2.51183
Uhrf1	-6.21252	-0.44804	-4.70467	1.86915e-05	0.00163827	1.27033
Emp2	-2.7226	3.39258	-4.70038	1.89699e-05	0.00164562	2.75486
Ak2	2.01619	4.83008	4.70154	1.88944e-05	0.00164562	2.73843
Jazf1	-1.80501	6.30608	-4.69528	1.93063e-05	0.00165996	2.6809
Uprt	-2.68759	3.61368	-4.69491	1.93315e-05	0.00165996	2.73927
Sst	-3.56013	8.65452	-4.68718	1.98533e-05	0.00169615	2.64165
Angel1	1.98993	4.09272	4.67989	2.0358e-05	0.0017286	2.68901
9930021J03Rik	-2.2755	5.94504	-4.67876	2.04374e-05	0.0017286	2.63161
Nudt5	2.38683	4.3699	4.67594	2.06371e-05	0.0017368	2.67136
Krt1	-2.48023	3.04499	-4.67216	2.09068e-05	0.00175079	2.65529
Gas2l1	-2.45485	4.57113	-4.66542	2.1398e-05	0.00177434	2.62485
Tbr1	-2.16331	5.47652	-4.664	2.15027e-05	0.00177434	2.59434
Pxylp1	-1.86088	4.31198	-4.66672	2.1302e-05	0.00177434	2.63816
Ncoa4	-1.35441	5.29692	-4.66097	2.17274e-05	0.00178418	2.58894
Arhgap26	-2.07801	6.12131	-4.65271	2.23536e-05	0.00182288	2.54425
Tril	-6.88577	0.818933	-4.65192	2.24142e-05	0.00182288	2.06884
Aldh2	-1.81849	5.37032	-4.64547	2.29163e-05	0.0018548	2.53543
Gpr158	-2.60095	4.50759	-4.64142	2.32377e-05	0.00187185	2.54972
Cct7	1.16502	8.38206	4.63155	2.40385e-05	0.00192718	2.46224
Hapln1	-6.23459	6.5131	-4.62928	2.42263e-05	0.00193307	2.46396
Esm1	-10.1356	-1.11848	-4.62735	2.43878e-05	0.00193683	0.472546
Tm6sf1	-3.52483	3.23549	-4.62054	2.49637e-05	0.0019733	2.50231
Ccng2	2.0935	5.6228	4.61837	2.51503e-05	0.0019788	2.44542
Adcy1	-2.23771	10.0538	-4.61441	2.54942e-05	0.00198145	2.40417
Far2	-2.26483	5.18484	-4.61651	2.53108e-05	0.00198145	2.44723
Tunar	-1.7783	4.62861	-4.61394	2.55353e-05	0.00198145	2.45906
Ankrd40	1.55502	5.8111	4.60977	2.59022e-05	0.00199164	2.41257
Cep41	-2.12094	3.31507	-4.61095	2.57976e-05	0.00199164	2.47301
Lin7a	-2.20702	6.11943	-4.59467	2.72772e-05	0.00207847	2.35712
Gemin2	3.4615	2.77672	4.59563	2.71878e-05	0.00207847	2.37866
Rnf141	-1.88216	6.71653	-4.58878	2.7832e-05	0.00211124	2.33238
Anapc7	1.18795	5.72688	4.58722	2.7981e-05	0.00211307	2.34161
Lrrc55	-4.09682	5.06856	-4.56786	2.98947e-05	0.00224755	2.29341
Cemip	-3.97458	5.79618	-4.56654	3.00295e-05	0.00224769	2.2706
Bpgm	1.75252	5.94376	4.56278	3.04181e-05	0.00226675	2.259
Snx5	2.09183	5.7385	4.55993	3.07157e-05	0.00227889	2.25477
Setd7	2.11318	6.81867	4.55269	3.14839e-05	0.00231557	2.21672
Mrfap1	1.45262	7.45461	4.55362	3.1384e-05	0.00231557	2.21495
Ate1	-2.20687	6.59919	-4.54645	3.21605e-05	0.00233502	2.19713
Tubg1	1.46415	5.14921	4.54603	3.22063e-05	0.00233502	2.22733
Rcan2	-3.65478	7.67101	-4.54518	3.23004e-05	0.00233502	2.186
2810029C07Rik	2.96784	2.30549	4.54566	3.22469e-05	0.00233502	2.16398
Tspan2	-2.53921	5.26296	-4.54367	3.24663e-05	0.00233702	2.21148
Col19a1	-5.50662	3.91947	-4.54106	3.27567e-05	0.00233803	2.24945
Plekha7	-2.08157	3.52846	-4.54122	3.27389e-05	0.00233803	2.2571
Rgs12	-2.04965	5.82121	-4.53963	3.29172e-05	0.00233961	2.18518
Zfp536	-2.71292	5.62122	-4.53657	3.32623e-05	0.00235425	2.17958
Clcn5	-2.26444	5.53587	-4.5315	3.38409e-05	0.00238522	2.1668
Rpl14	1.7254	7.11725	4.52569	3.45167e-05	0.00242276	2.12743
Tbc1d7	1.57027	4.32949	4.52107	3.50643e-05	0.00245102	2.17895
Mrpl45	2.14413	5.44194	4.51535	3.57532e-05	0.00248515	2.12074
Colgalt1	1.65785	5.93278	4.51358	3.59692e-05	0.00248515	2.10164
Ppm1e	-1.88779	8.31261	-4.51338	3.59933e-05	0.00248515	2.08132
Eif2b3	1.70811	4.20187	4.50385	3.71781e-05	0.00255652	2.12929
Sorcs3	-2.24955	5.47402	-4.50093	3.7549e-05	0.00257157	2.06856
Slc25a1	-2.57348	6.69216	-4.49628	3.81465e-05	0.00260196	2.03802
Rpia	1.9546	3.25161	4.49238	3.86552e-05	0.00262072	2.10209
Armt1	2.35336	3.09555	4.4918	3.87314e-05	0.00262072	2.09312
Med1	-1.81339	5.95647	-4.4781	4.05735e-05	0.00273009	1.98609
Samd4b	-3.8328	5.97672	-4.4774	4.06705e-05	0.00273009	1.98362
Hipk4	-3.91293	1.05789	-4.47263	4.13325e-05	0.00276035	1.67941
Tmem130	-2.15845	8.74895	-4.47181	4.14477e-05	0.00276035	1.94713
Slc35f3	-2.40615	3.53457	-4.47056	4.16241e-05	0.00276123	2.0381
Maml2	-2.62298	1.61791	-4.46272	4.27442e-05	0.00282446	1.82405
Susd4	1.01455	6.20502	4.45806	4.34233e-05	0.00285816	1.91962
Prdx6	1.61749	5.74238	4.45385	4.40466e-05	0.00288056	1.91589
Lgalsl	-1.72919	7.25912	-4.45344	4.41078e-05	0.00288056	1.89476
Pld5	-4.22506	1.60916	-4.45233	4.42745e-05	0.00288056	1.80426
Psmd4	1.43501	7.00981	4.44945	4.47079e-05	0.00289762	1.88458
Msh3	1.82861	4.17798	4.44746	4.50092e-05	0.00290601	1.95395
Fam102b	-1.6034	7.0134	-4.44351	4.56136e-05	0.00293384	1.86486
Bmi1	-2.17766	5.593	-4.44051	4.60798e-05	0.0029526	1.87442
Homer2	-1.92168	6.11619	-4.43847	4.63979e-05	0.00296176	1.85742
Zbtb5	1.29359	5.24848	4.43503	4.69397e-05	0.00298508	1.87126
Sgf29	2.30163	3.11177	4.42872	4.79507e-05	0.00303796	1.90281
Pofut2	-1.88129	4.72081	-4.42116	4.91913e-05	0.00310493	1.84327
Sec11a	2.01923	5.42072	4.41867	4.96061e-05	0.00311947	1.81439
Klf12	-3.49171	4.16199	-4.41686	4.991e-05	0.00312696	1.85143
Arid1a	-1.8341	7.03385	-4.41088	5.09257e-05	0.00317882	1.76102
Fam168a	-1.58469	8.23743	-4.40922	5.12122e-05	0.00317885	1.74955
Kif18b	-14.2484	-3.34579	-4.4087	5.1302e-05	0.00317885	-1.71592
Chml	-3.09282	5.59097	-4.39635	5.34808e-05	0.00330176	1.73486
Cap1	-1.40626	7.73302	-4.39453	5.38087e-05	0.00330992	1.70539
Nppc	-5.30245	3.45922	-4.38762	5.5076e-05	0.0033756	1.78252
Atf5	-2.39902	5.71883	-4.38499	5.55645e-05	0.00338472	1.69481
Stx17	-1.77937	5.21932	-4.38467	5.56249e-05	0.00338472	1.70885
Apbb2	-1.77935	5.57114	-4.38066	5.63805e-05	0.00340619	1.68579
Cacng5	-3.3861	4.45752	-4.38076	5.63604e-05	0.00340619	1.72608
Stc1	3.19071	4.37031	4.37791	5.69038e-05	0.00342557	1.73561
Diras2	-2.81832	7.63884	-4.37451	5.75568e-05	0.00345259	1.64213
Nrm	3.97035	1.62859	4.36661	5.91062e-05	0.003533	1.46352
Mdp1	1.29709	5.48314	4.36426	5.9574e-05	0.0035406	1.63977
Amot	-3.39394	3.60986	-4.36387	5.96518e-05	0.0035406	1.70733
Rhbdd2	-1.1571	5.5916	-4.36169	6.00894e-05	0.00354172	1.62617
Gm14204	2.53367	4.14991	4.36173	6.0082e-05	0.00354172	1.69024
Megf6	-3.64494	2.88073	-4.35644	6.11574e-05	0.00359215	1.68367
Etl4	-3.44659	5.81988	-4.35102	6.22805e-05	0.00363327	1.58616
Tbc1d22b	-1.46242	5.9713	-4.35023	6.24462e-05	0.00363327	1.58083
Unc5c	-3.30171	6.64262	-4.34996	6.25018e-05	0.00363327	1.57117
Tomm22	1.73516	6.36945	4.34704	6.31159e-05	0.00364392	1.56658
Pygo1	-1.64526	6.66566	-4.34716	6.30917e-05	0.00364392	1.56266
Pidd1	3.43863	2.54689	4.34357	6.3855e-05	0.00367405	1.60386
Dstyk	1.44215	5.84264	4.33993	6.4639e-05	0.00370655	1.55425
Copz1	1.16165	7.06574	4.33699	6.52782e-05	0.00373056	1.52829
Tmod2	-2.14274	9.5841	-4.33589	6.55196e-05	0.00373175	1.51477
Cyth2	1.63573	6.51397	4.33287	6.61862e-05	0.00375707	1.52057
Triap1	1.60138	4.57705	4.33106	6.65865e-05	0.00376715	1.57445
Parp2	1.58692	4.31435	4.32929	6.6983e-05	0.00377695	1.58072
Endod1	-1.21083	6.24056	-4.32602	6.77196e-05	0.00380572	1.50074
Tug1	-2.23828	7.19456	-4.32504	6.79432e-05	0.00380572	1.48888
Mapk11	1.7824	4.19669	4.32293	6.84232e-05	0.00381996	1.56669
Tmem143	-2.00366	4.38197	-4.31792	6.958e-05	0.00387176	1.53564
Zcchc2	-2.3019	5.02477	-4.30965	7.15299e-05	0.00396721	1.48137
Smarcd1	1.21738	7.03838	4.30475	7.27097e-05	0.00401947	1.42726
Nmt1	1.14565	6.95032	4.30274	7.31989e-05	0.00402023	1.42164
Taldo1	1.47839	6.29292	4.3034	7.30378e-05	0.00402023	1.43054
Fam167a	-2.65446	2.8271	-4.29946	7.40051e-05	0.00405136	1.51216
Cnot9	1.45379	6.05671	4.28963	7.64727e-05	0.00417294	1.39159
Rph3a	-1.6262	7.31838	-4.28623	7.73451e-05	0.00420698	1.36653
Ina	-1.66623	8.54523	-4.2817	7.85211e-05	0.00425725	1.34653
Ttc27	1.69009	4.61376	4.27872	7.93044e-05	0.00428598	1.41089
Psd2	-1.36307	6.59289	-4.27403	8.05524e-05	0.00432579	1.33397
Prickle1	2.4464	5.35058	4.27458	8.04059e-05	0.00432579	1.36649
Lsm2	1.96508	2.96205	4.27186	8.11372e-05	0.00434341	1.4283
Slc6a1	-2.36592	9.67589	-4.26655	8.25832e-05	0.00440687	1.29719
Odc1	1.30356	6.99148	4.25979	8.44638e-05	0.00446656	1.28706
Ccdc85a	-1.85615	6.00331	-4.25968	8.4494e-05	0.00446656	1.29651
Phtf1	1.57442	5.03967	4.2604	8.42904e-05	0.00446656	1.33437
Ablim3	-1.61315	7.18429	-4.25592	8.55571e-05	0.00450868	1.2727
Snap91	-1.47563	9.03706	-4.25387	8.61417e-05	0.00452538	1.25832
Dusp4	-4.01052	5.62248	-4.24966	8.73539e-05	0.00454116	1.27292
Cisd1	1.57108	6.52585	4.25171	8.67631e-05	0.00454116	1.26615
Taok3	-1.93745	5.90027	-4.25061	8.70784e-05	0.00454116	1.27133
Adamtsl1	-3.14199	2.83594	-4.24911	8.75159e-05	0.00454116	1.3631
Prdx2	1.19954	8.56106	4.23891	9.05299e-05	0.00468319	1.21318
Nfic	-2.20435	4.34956	-4.236	9.14081e-05	0.00471421	1.2844
Ccdc120	-1.56583	4.55033	-4.23503	9.17009e-05	0.00471493	1.27277
Rpl6	1.33468	7.61597	4.23315	9.22765e-05	0.00473015	1.1998
C9orf72	1.64669	6.10304	4.22629	9.43987e-05	0.00482432	1.19385
Ficd	-1.78425	3.25071	-4.22318	9.5376e-05	0.00485958	1.28773
Ivd	-1.34148	5.69429	-4.22055	9.6212e-05	0.00488745	1.18213
Kctd10	1.55562	4.94175	4.21784	9.70792e-05	0.00491674	1.20739
Plekha8	1.67902	4.4708	4.21363	9.8441e-05	0.00495603	1.21794
Kif3c	-1.38221	8.5522	-4.21396	9.83353e-05	0.00495603	1.13523
Mthfd1	1.58522	5.13547	4.20926	9.98761e-05	0.00498379	1.17139
Klf15	-2.42374	3.01898	-4.21021	9.95622e-05	0.00498379	1.24997
Eri1	1.86345	4.69478	4.20938	9.98364e-05	0.00498379	1.19385
Adarb2	-2.95123	5.6612	-4.20761	0.000100423	0.00499632	1.14173
Isca1	-1.55398	6.2894	-4.20352	0.00010179	0.00504952	1.1181
Rnf6	1.27284	5.47898	4.20259	0.000102106	0.00505036	1.13624
Nfatc3	1.86262	3.72694	4.19957	0.000103131	0.00508618	1.20959
Drg2	1.30295	5.97856	4.19863	0.000103451	0.00508713	1.10978
Psmc4	1.25673	6.59814	4.19526	0.000104611	0.00512926	1.09009
Hlcs	1.99859	3.47612	4.19362	0.000105179	0.00514222	1.19836
Marchf3	3.87204	1.57993	4.19179	0.000105817	0.0051437	0.986506
Stox2	-1.54266	8.21688	-4.19231	0.000105635	0.0051437	1.06928
Pbx2	1.5079	5.09475	4.18595	0.000107878	0.00522884	1.10259
Lratd1	-1.51723	5.32022	-4.18191	0.000109326	0.00528387	1.07454
Pcdha1	-3.25799	1.81675	-4.18104	0.000109638	0.00528387	1.07915
Rab11fip3	-1.27094	6.43776	-4.17723	0.000111025	0.0053355	1.03491
Agk	1.30359	5.5432	4.17582	0.000111543	0.00534522	1.05145
Fam91a1	-2.15194	6.39399	-4.17143	0.000113171	0.00536248	1.01727
Taf9b	-2.04082	5.29763	-4.1738	0.000112288	0.00536248	1.05163
Tacc1	-1.82213	6.1923	-4.17262	0.000112726	0.00536248	1.024
E130307A14Rik	-1.22322	4.81459	-4.17154	0.00011313	0.00536248	1.06522
Kit	-3.94475	6.54416	-4.16716	0.000114775	0.00541797	1.00211
Dgkg	-2.07431	4.90364	-4.16661	0.000114983	0.00541797	1.04505
Tmem161a	1.44644	5.21226	4.16346	0.000116181	0.00544231	1.02676
Ndufaf7	1.42779	5.28104	4.16436	0.000115838	0.00544231	1.02666
Flcn	-1.34666	5.54482	-4.16272	0.000116465	0.00544231	1.00826
Myd88	3.6346	1.34087	4.16024	0.00011742	0.00547182	0.825749
Rnf150	-2.41132	5.26512	-4.15723	0.000118591	0.0055112	1.00111
Trp53inp1	3.91139	5.11041	4.15351	0.00012005	0.00555076	1.00885
Ust	-2.34717	4.99533	-4.15339	0.000120098	0.00555076	1.0007
Rgs7bp	-2.47219	7.35322	-4.15181	0.000120724	0.0055645	0.948687
Cnot8	1.24081	5.72205	4.15081	0.000121125	0.00556778	0.968766
Epb41l3	-1.32239	7.1455	-4.14845	0.000122066	0.00559587	0.939922
AI854703	-1.4024	4.96768	-4.14753	0.000122439	0.00559776	0.983965
Hipk1	-1.94584	6.29661	-4.14556	0.000123231	0.00561882	0.939334
Trim62	-1.40718	5.72623	-4.14162	0.000124841	0.00567689	0.937687
Gfer	1.72444	3.95545	4.13988	0.000125558	0.00569421	1.01966
Ptbp3	2.97979	4.30123	4.13687	0.000126805	0.00573536	0.997206
Nnt	-1.8323	3.39705	-4.1348	0.00012767	0.00574829	1.02087
Ndufs1	1.23494	7.21993	4.13294	0.00012845	0.00574829	0.892433
Kcnc4	-1.56832	5.06266	-4.13359	0.000128177	0.00574829	0.936808
Arhgef6	-2.71604	3.29324	-4.13412	0.000127956	0.00574829	1.02181
Tmem176b	-1.98145	4.06271	-4.12741	0.000130806	0.00582601	0.970084
Chl1	-1.78377	9.99311	-4.12725	0.000130875	0.00582601	0.864936
Creg2	-2.02698	5.92147	-4.11867	0.00013461	0.00597653	0.862953
Lars2	5.45835	8.07556	4.11751	0.000135123	0.00598361	0.840889
Npc2	1.24634	6.19866	4.11285	0.000137204	0.00605991	0.841454
Parp1	1.49507	6.82618	4.1085	0.000139174	0.00613089	0.820717
Rwdd4a	2.42847	4.86152	4.10558	0.000140512	0.00617377	0.870358
Dtd2	2.0912	2.857	4.10166	0.000142327	0.00623732	0.925992
Gnptab	-1.81308	6.72287	-4.10025	0.000142986	0.00625002	0.795266
Cit	-1.8506	4.65432	-4.09493	0.000145494	0.00632021	0.841279
Lgi3	-2.61127	3.08582	-4.09447	0.000145713	0.00632021	0.90793
Agap1	-1.41334	8.29999	-4.09481	0.000145551	0.00632021	0.768583
Stat3	1.43952	6.03756	4.09237	0.00014672	0.00634762	0.782078
Cct5	1.35021	8.27495	4.09031	0.000147712	0.00635799	0.755391
Pacc1	1.73433	4.41918	4.09089	0.000147433	0.00635799	0.848071
Clvs1	-1.77524	4.29661	-4.08317	0.0001512	0.00645882	0.823412
Sp8	-3.98798	2.78893	-4.08454	0.000150524	0.00645882	0.879237
Rpl3	1.29128	8.44559	4.08377	0.000150901	0.00645882	0.734633
Trim67	-1.53366	7.68923	-4.0778	0.000153876	0.006542	0.719496
Slc30a7	-1.52054	4.62168	-4.07771	0.00015392	0.006542	0.788746
Ift52	-2.37764	4.3939	-4.07555	0.000155007	0.00655524	0.797547
Ccnd3	-3.29824	3.67245	-4.07566	0.000154951	0.00655524	0.83349
Hsd17b4	-1.12799	5.46546	-4.07186	0.000156889	0.00661828	0.734951
Aen	1.4815	6.25765	4.07092	0.000157369	0.00662201	0.712549
Magee2	-1.72724	3.67188	-4.06779	0.000158986	0.00665697	0.811586
Cyb5r4	2.10514	5.8497	4.06848	0.000158625	0.00665697	0.714608
Tcim	-3.76292	3.34735	-4.06144	0.00016231	0.00677937	0.802678
Dtd1	1.33078	5.49835	4.06031	0.000162912	0.00678773	0.700075
Fam131c	-2.53261	4.31637	-4.05877	0.000163732	0.00680512	0.748561
Igfbp7	-4.5414	0.444741	-4.05421	0.00016618	0.00688997	0.34527
Vdac1	1.28367	9.44953	4.05145	0.000167683	0.00693526	0.633246
Cacng2	-1.63958	6.01836	-4.04862	0.000169234	0.00698236	0.647358
Tppp	-3.24545	6.94223	-4.04746	0.000169875	0.00699172	0.632138
Ube3c	1.36344	7.58353	4.0466	0.000170348	0.00699419	0.625841
Twsg1	1.17549	5.44182	4.04507	0.0001712	0.00701213	0.656414
Nedd4	1.39956	9.72836	4.03698	0.000175763	0.00718166	0.58894
Crim1	-2.40561	5.87254	-4.03409	0.000177422	0.00723197	0.605558
Nek7	-3.03452	4.53739	-4.03256	0.000178306	0.00725052	0.655867
St8sia5	-2.27741	3.81834	-4.02558	0.0001824	0.00736449	0.676427
Fgf1	-4.01102	1.63537	-4.0263	0.000181974	0.00736449	0.625041
Tet1	-2.41648	5.62824	-4.02555	0.000182414	0.00736449	0.586306
Bri3bp	-2.08404	7.41442	-4.02078	0.00018526	0.00746155	0.547666
Fndc3b	-3.10978	5.36373	-4.01955	0.000186002	0.00747364	0.576485
4833439L19Rik	1.1253	7.21255	4.01718	0.000187442	0.00751368	0.538974
Mctp1	-2.75342	5.8283	-4.01581	0.000188274	0.00752919	0.553397
Map7d1	-1.79048	7.36828	-4.01363	0.000189608	0.00756465	0.526192
Cadps2	-2.74814	5.93429	-4.00942	0.000192214	0.00763262	0.529397
Bcl7a	1.66658	6.70299	4.0096	0.000192103	0.00763262	0.52089
Sema6a	-2.75392	6.50159	-4.00682	0.000193844	0.0076793	0.513734
Frem3	-4.44153	1.9089	-4.00454	0.000195283	0.00771824	0.599588
Agpat4	-1.23507	6.1104	-4.00368	0.000195828	0.00772038	0.509569
Nudt1	2.95181	2.80159	4.00266	0.000196472	0.00772038	0.638336
Vgll2	-10.7506	-1.43749	-4.00229	0.000196706	0.00772038	-0.974533
Arpc5l	1.23212	6.079	4.00054	0.000197827	0.00774638	0.502062
Chrd	-2.40893	3.33846	-3.99388	0.00020214	0.00786034	0.606025
Abcg1	1.80409	4.41804	3.99279	0.000202851	0.00786034	0.554925
Vamp3	2.48865	4.00961	3.99247	0.00020306	0.00786034	0.581579
Frem2	-3.20791	3.22885	-3.99334	0.00020249	0.00786034	0.608206
Lix1l	1.87693	5.43787	3.99287	0.000202798	0.00786034	0.500311
Unc80	-2.1925	5.99339	-3.99094	0.000204069	0.00788136	0.472541
Scn3b	1.35324	7.98458	3.98428	0.000208517	0.00802493	0.434554
Colq	12.85	-2.99192	3.98325	0.00020921	0.00802493	-2.661
LOC102639719	12.85	-2.99192	3.98325	0.00020921	0.00802493	-2.661
Fer1l5	-2.01554	3.65978	-3.98061	0.000211004	0.00807543	0.553716
Spata5	1.53656	4.17184	3.97904	0.000212078	0.00809823	0.527176
Syngr3	-1.07892	8.28418	-3.9773	0.000213274	0.00811668	0.411379
Cdc123	1.2544	5.51376	3.97694	0.000213521	0.00811668	0.447975
Coasy	1.37903	5.45449	3.96761	0.000220048	0.00833574	0.422355
Mrpl40	1.75431	4.75092	3.9673	0.000220269	0.00833574	0.458273
Styx	3.63385	1.62172	3.96646	0.000220863	0.00833953	0.394443
Slc44a5	2.71167	4.98955	3.96528	0.000221708	0.00835281	0.444995
B3glct	-1.97623	4.45195	-3.96454	0.000222238	0.00835419	0.45881
Esrrg	-3.79142	5.02997	-3.96195	0.000224105	0.00836858	0.41706
St3gal4	1.55792	3.9819	3.96258	0.000223648	0.00836858	0.490793
Hyal3	5.01695	0.0112693	3.9627	0.000223562	0.00836858	-0.326368
Mrps16	1.77806	4.80505	3.95938	0.000225967	0.00841951	0.43136
Papln	-5.51519	2.38425	-3.95808	0.000226914	0.00843621	0.509583
Zmynd11	-1.01307	7.58784	-3.95296	0.000230689	0.00853901	0.34188
Lasp1	-1.69459	7.18478	-3.95301	0.000230655	0.00853901	0.345799
Hmgcl	1.30181	4.99638	3.94649	0.00023555	0.00868948	0.381358
Med18	2.85791	1.72816	3.94618	0.000235781	0.00868948	0.378989
Fam20c	-1.30357	6.04063	-3.94298	0.000238224	0.00876043	0.327937
Fgd1	-2.04835	4.90248	-3.93852	0.00024167	0.00886786	0.360727
Epas1	-5.00335	0.950842	-3.9341	0.000245124	0.00897515	0.231224
Osgep	1.7036	4.41942	3.92991	0.000248448	0.00898903	0.367352
Ggnbp2	1.39387	6.57883	3.92921	0.000249005	0.00898903	0.279974
Clcn2	-1.43632	5.04121	-3.93031	0.000248129	0.00898903	0.324181
Slc23a2	-1.71028	6.63937	-3.92787	0.000250081	0.00898903	0.274053
Nipal3	-1.57732	5.89917	-3.9326	0.000246307	0.00898903	0.299968
Gnao1	-1.13899	9.8659	-3.92831	0.000249727	0.00898903	0.260538
Ndnf	-3.73513	5.42346	-3.92917	0.000249037	0.00898903	0.303093
Usp31	-1.74309	6.49472	-3.92696	0.000250817	0.00898903	0.273015
Lrrtm2	-2.03812	5.9165	-3.92726	0.00025057	0.00898903	0.283663
D030028A08Rik	-1.71503	3.64811	-3.93023	0.000248194	0.00898903	0.406939
Hif1an	1.0442	6.73748	3.92299	0.000254036	0.00908438	0.259462
Sorcs1	-1.8908	4.53651	-3.92235	0.000254552	0.00908438	0.329401
Col2a1	-4.53825	0.47136	-3.92147	0.000255273	0.00909093	0.0386134
Prelid1	1.24741	7.24398	3.91869	0.000257562	0.0091532	0.242257
Papola	-1.41021	7.00999	-3.9148	0.000260801	0.00924885	0.231529
Fra10ac1	1.79908	4.0175	3.90948	0.00026528	0.00938802	0.332505
Ngfr	-3.7323	2.78355	-3.90094	0.000272639	0.0096283	0.351148
Fstl5	-2.32057	6.5045	-3.89685	0.000276235	0.00973499	0.182695
Daam1	-1.68181	7.44242	-3.89538	0.000277537	0.00976053	0.170198
Dld	1.47411	7.49222	3.89276	0.000279871	0.00978216	0.162987
Ap1g2	3.9188	2.41007	3.89275	0.000279887	0.00978216	0.308635
Adamts17	-2.77676	4.40555	-3.89362	0.000279102	0.00978216	0.250051
Wdr77	1.6116	5.44977	3.88897	0.000283292	0.00986446	0.188585
H2bc21	2.74323	2.55913	3.88884	0.000283408	0.00986446	0.311215
Chrna7	-3.15063	4.94393	-3.88263	0.000289093	0.0100329	0.186435
Bgn	-5.4841	0.510933	-3.88112	0.000290487	0.0100329	-0.0365593
Emc8	-1.28371	5.72618	-3.88179	0.000289863	0.0100329	0.153142
Cdc42se1	1.40279	6.1273	3.88098	0.000290618	0.0100329	0.143737
F830016B08Rik	-11.1258	-2.52653	-3.8802	0.000291338	0.0100372	-1.83725
Ercc6l2	1.81028	4.06241	3.87717	0.000294176	0.0101144	0.237091
Pcolce2	-4.62236	0.0479811	-3.87639	0.000294907	0.0101189	-0.256763
Dnal4	1.6036	5.02236	3.87274	0.000298369	0.010217	0.161685
Spsb4	-2.00247	3.71924	-3.86926	0.000301694	0.01031	0.22479
Ogfrl1	-2.10155	5.67146	-3.86575	0.000305091	0.0103841	0.106598
Lrrc8c	-2.13628	4.73686	-3.86629	0.000304564	0.0103841	0.151143
Jam2	-3.02187	3.07319	-3.86043	0.000310317	0.0105408	0.230265
Wiz	-2.38009	6.37847	-3.85882	0.000311908	0.0105525	0.0749874
Fam186b	-3.99133	1.23126	-3.85927	0.000311465	0.0105525	0.107338
Sulf2	-1.52966	6.64057	-3.85526	0.000315469	0.0106517	0.0578607
Nf1	-2.04747	7.20367	-3.85081	0.000319968	0.010782	0.0392681
Ccdc90b	2.48093	3.75938	3.8486	0.000322222	0.0108364	0.173934
Snip1	1.3491	4.0203	3.84511	0.000325821	0.0109357	0.143609
Prkacb	-1.3683	8.95117	-3.84367	0.000327318	0.0109536	0.00940199
Brd4	-2.16984	6.6565	-3.84335	0.000327651	0.0109536	0.0220816
Dusp7	-1.4075	5.16292	-3.84184	0.00032923	0.0109847	0.0565138
Vps26a	1.50256	5.58992	3.83639	0.000334987	0.0111548	0.027296
Cpeb3	-2.17809	5.50846	-3.83561	0.000335821	0.0111606	0.0226175
Psen1	-1.45543	6.01851	-3.83357	0.000338005	0.011179	0.00333948
Slc7a11	-4.20069	2.58934	-3.83324	0.000338357	0.011179	0.16149
Kctd1	-1.30781	4.4343	-3.83351	0.000338066	0.011179	0.0748158
Tdrp	3.27315	1.81276	3.82968	0.000342199	0.0112839	0.0772246
Stk11ip	1.52029	5.45002	3.82591	0.000346322	0.0113755	0.00227947
Frg1	1.81682	4.22186	3.82615	0.000346062	0.0113755	0.0766078
Marchf6	1.51798	8.61319	3.82521	0.000347096	0.0113788	-0.0438092
Macroh2a1	0.999945	6.00333	3.8215	0.000351206	0.0114691	-0.0305396
Hdac6	-1.52038	6.51972	-3.82177	0.000350898	0.0114691	-0.0399698
Cplx3	-5.83668	0.284492	-3.82087	0.00035191	0.01147	-0.273727
Slc25a15	1.64473	3.11304	3.81953	0.000353399	0.0114964	0.118628
Thap12	1.17499	6.20675	3.81474	0.000358814	0.0116501	-0.0544264
Alkal2	-5.78442	2.05498	-3.81261	0.000361248	0.0117066	0.0888555
Zim1	-2.40564	4.37973	-3.80825	0.000366266	0.0118308	0.00450775
Ago1	-1.98374	6.73145	-3.80807	0.000366479	0.0118308	-0.0824403
Rasa3	-1.49454	5.45456	-3.80728	0.000367387	0.0118376	-0.0573682
Lrrc8a	-2.41966	3.79325	-3.80567	0.000369269	0.0118756	0.0407541
Sap130	-1.70583	5.93946	-3.8049	0.000370169	0.0118819	-0.0792328
Gfod1	-2.55992	5.95399	-3.80319	0.000372183	0.0119239	-0.0858426
Sntb1	-5.10647	0.272483	-3.79727	0.000379223	0.0121265	-0.326566
Slc6a8	-2.01985	6.88956	-3.7955	0.000381349	0.0121578	-0.121025
Arid5b	-3.44793	4.95764	-3.79526	0.000381637	0.0121578	-0.071363
Dnph1	3.24624	1.93767	3.79358	0.000383665	0.0121994	-0.00242181
Ilrun	0.892674	7.50583	3.79292	0.000384469	0.012202	-0.132948
Ssbp1	2.28173	4.32891	3.79054	0.000387367	0.012271	-0.0324634
Cdr2l	-2.51693	4.91544	-3.78782	0.000390711	0.0123538	-0.0883537
Ankrd17	-1.30707	7.88588	-3.78674	0.000392052	0.012373	-0.154149
Gjd2	-1.43716	5.3053	-3.78506	0.000394136	0.0124157	-0.116816
Marco	-14.2153	-4.75642	-3.77865	0.000402195	0.012646	-3.02434
Peds1	1.15435	5.30254	3.77768	0.000403421	0.012661	-0.133068
Cachd1	-3.2123	4.46316	-3.77547	0.000406247	0.0127261	-0.100407
Zfp873	2.76377	2.8501	3.7738	0.000408396	0.0127697	-0.00382047
Psma1	2.01711	7.1171	3.77226	0.000410387	0.0128083	-0.190003
Ssx2ip	1.59255	6.16836	3.76949	0.000413983	0.0128968	-0.185665
Klhdc8a	-1.5814	4.471	-3.76811	0.000415792	0.0128983	-0.117606
Rimkla	1.40579	5.01576	3.76852	0.000415245	0.0128983	-0.143723
Cds2	-1.15374	9.04618	-3.7677	0.00041632	0.0128983	-0.214758
Pex5	-1.64516	6.91306	-3.7658	0.000418826	0.0129522	-0.20814
Ascl1	-3.12595	3.11647	-3.76273	0.000422893	0.0130304	-0.0486552
Aldh1l2	-1.94576	6.09471	-3.76293	0.000422621	0.0130304	-0.206359
Ptprm	-1.94113	4.94893	-3.76059	0.000425755	0.0130947	-0.170386
Sord	2.08118	4.4992	3.75557	0.000432528	0.0132788	-0.142765
Eif3f	1.18339	6.83056	3.75437	0.000434175	0.0132886	-0.240055
Serpinb9	-3.91483	1.29047	-3.75419	0.000434417	0.0132886	-0.161822
Baiap2l2	-3.48423	4.29255	-3.7498	0.000440451	0.0133011	-0.16265
Trim9	-1.72122	7.0886	-3.75091	0.000438922	0.0133011	-0.253676
Ppp1r18	2.35996	4.47405	3.75148	0.000438132	0.0133011	-0.153918
Ccdc149	-2.20257	4.91854	-3.7499	0.000440319	0.0133011	-0.200359
Rgmb	-1.52893	6.64	-3.75211	0.000437263	0.0133011	-0.24559
Tnip2	-2.18213	3.0367	-3.74932	0.000441117	0.0133011	-0.0824317
Cenpj	2.64648	2.52206	3.75019	0.000439915	0.0133011	-0.0717566
Gm15638	-12.7528	-3.43757	-3.75109	0.000438667	0.0133011	-2.49929
Alcam	-2.07977	7.79606	-3.74196	0.000451439	0.0135881	-0.284932
Kif17	-2.00385	3.96943	-3.73932	0.000455193	0.0136768	-0.166706
Mcm5	-3.05853	1.31281	-3.7369	0.000458665	0.0137323	-0.197653
Hibch	1.88788	4.33614	3.73743	0.00045791	0.0137323	-0.18699
Kcnab2	-1.54544	6.55986	-3.73597	0.000460011	0.0137375	-0.291346
Immt	0.998022	7.49904	3.73566	0.00046046	0.0137375	-0.300459
Atl3	2.18427	5.07125	3.73505	0.000461342	0.0137395	-0.239277
Clcn6	-2.19673	6.92391	-3.73435	0.000462363	0.0137457	-0.299747
Wdr62	-3.19663	1.38991	-3.7289	0.000470322	0.0139578	-0.202984
Vps26c	1.31944	6.00075	3.72634	0.000474113	0.0139723	-0.308431
Ash1l	-1.76674	6.69484	-3.72682	0.000473413	0.0139723	-0.317661
Dnajc6	-1.55509	7.90029	-3.72798	0.000471691	0.0139723	-0.326212
Slc25a16	-1.27312	5.03791	-3.72639	0.000474047	0.0139723	-0.272372
Vrk3	1.47932	4.16473	3.72556	0.000475282	0.0139796	-0.209673
Kcnc2	-1.76603	6.05091	-3.72396	0.000477665	0.0139796	-0.317201
Frat2	-2.0669	3.29717	-3.72455	0.000476792	0.0139796	-0.162784
Frem1	-4.4031	0.376793	-3.7241	0.000477459	0.0139796	-0.466498
Hmx1	13.0581	-2.007	3.72258	0.000479736	0.0140159	-2.3792
Impdh2	1.27442	5.83462	3.72167	0.000481103	0.0140316	-0.317331
Gm9776	2.83479	1.65585	3.71792	0.000486789	0.014173	-0.231056
Rcn2	-1.66825	6.62808	-3.71464	0.000491819	0.0142312	-0.354054
Adam22	-1.27498	7.61066	-3.71484	0.000491502	0.0142312	-0.362549
Pnoc	-4.5754	5.15588	-3.71458	0.000491916	0.0142312	-0.310202
Zfp804b	-4.04192	2.04392	-3.71442	0.000492152	0.0142312	-0.175572
Btbd17	-3.95063	0.817242	-3.71192	0.000496029	0.0143188	-0.370435
Sra1	1.13959	6.32732	3.70912	0.000500385	0.014332	-0.365255
Npas2	-2.43817	4.21263	-3.7093	0.000500103	0.014332	-0.271659
Zswim4	-1.85078	4.56145	-3.70959	0.000499648	0.014332	-0.29378
Plppr4	-1.57558	8.74905	-3.7108	0.000497771	0.014332	-0.380062
Kics2	-1.9203	3.01305	-3.7089	0.000500722	0.014332	-0.193438
Smarcd2	2.41876	3.15393	3.70816	0.000501884	0.014341	-0.193543
Cnnm3	-1.63472	4.44126	-3.70028	0.000514405	0.0146656	-0.311622
Pla2r1	-12.5357	-3.93533	-3.69993	0.000514977	0.0146656	-2.79408
Rab8a	-0.99989	5.58641	-3.69577	0.000521696	0.014807	-0.386738
Cbwd1	1.89319	4.11361	3.69583	0.000521603	0.014807	-0.289721
Plgrkt	2.45708	4.44732	3.69414	0.000524373	0.0148581	-0.317263
Exoc4	1.00911	7.15173	3.69359	0.000525269	0.0148586	-0.419783
Hars2	1.44441	4.80726	3.6906	0.000530195	0.0149729	-0.355689
Rundc3b	1.40302	6.5634	3.68859	0.000533522	0.0150167	-0.427984
Iffo2	1.25395	4.85249	3.68866	0.000533408	0.0150167	-0.364987
Necab2	-1.37605	5.61215	-3.68727	0.00053572	0.0150535	-0.412269
Polr1has	3.00825	1.20112	3.68444	0.000540468	0.0151618	-0.404141
Ptpn4	-2.68664	6.44822	-3.68381	0.000541537	0.0151666	-0.441893
Drg1	1.27061	6.79704	3.68232	0.000544059	0.0152121	-0.448843
Fam43a	-3.24014	4.21728	-3.6809	0.000546476	0.0152544	-0.354374
Aptx	1.49382	5.34377	3.68025	0.000547574	0.0152599	-0.416694
Dpy19l3	-1.48209	5.6403	-3.6779	0.000551603	0.0153469	-0.440808
Gsto1	1.33976	5.56185	3.67707	0.000553031	0.0153532	-0.436341
Cflar	-2.55593	3.53018	-3.67623	0.000554483	0.0153532	-0.315804
Bbs7	1.50468	4.70346	3.67619	0.000554552	0.0153532	-0.38905
Lrrc45	-1.70249	5.08747	-3.67521	0.000556239	0.0153747	-0.424968
Plekhg1	-3.0146	3.19303	-3.67456	0.000557365	0.0153807	-0.299819
Col8a1	-4.59936	0.742937	-3.67401	0.000558331	0.0153823	-0.468177
Sart3	1.31503	5.17564	3.67263	0.00056073	0.015385	-0.430075
Cgnl1	-4.88212	-0.487889	-3.67135	0.000562976	0.015385	-0.96636
Uspl1	1.28624	5.77392	3.67222	0.000561444	0.015385	-0.458584
Haus1	2.43288	2.75715	3.67324	0.000559674	0.015385	-0.279446
Arid1b	-1.66072	6.94232	-3.6718	0.000562181	0.015385	-0.481943
Axin2	-2.05849	3.4933	-3.67011	0.000565147	0.0154065	-0.329594
Rpl10a-ps1	2.23859	2.85207	3.66986	0.000565584	0.0154065	-0.290413
Utrn	-2.63448	4.30846	-3.66555	0.000573221	0.0155894	-0.403958
Tmem151a	-1.5516	6.37966	-3.66161	0.000580292	0.0157564	-0.504144
Kcna2	-2.06075	6.40142	-3.66083	0.000581698	0.0157692	-0.507676
Ski	-1.41006	7.09368	-3.65686	0.000588913	0.0158884	-0.526258
Amigo1	-1.02994	6.16764	-3.65708	0.000588519	0.0158884	-0.514453
Zfp961	2.60242	3.34773	3.65735	0.000588024	0.0158884	-0.343169
Psmc6	2.09117	7.42563	3.65446	0.000593324	0.0159328	-0.534618
Arpc3	1.18967	7.54652	3.65443	0.000593384	0.0159328	-0.536035
Irs1	-2.46897	4.9089	-3.65446	0.000593329	0.0159328	-0.474223
Myh4	-8.07901	-1.31417	-3.6539	0.000594349	0.0159335	-1.41993
Snx17	-1.28419	5.80373	-3.65228	0.000597346	0.0159857	-0.519195
Zfp958	2.79752	4.32657	3.65183	0.000598186	0.0159857	-0.427388
Zfp385c	-10.9023	-2.78129	-3.65087	0.000599981	0.0160083	-2.27907
Shisa9	-1.86127	6.75348	-3.65004	0.000601522	0.0160242	-0.542692
Tbk1	1.26862	4.82507	3.64571	0.000609654	0.0161139	-0.485803
Dcun1d2	1.42933	5.28992	3.64653	0.0006081	0.0161139	-0.510084
Ensa	0.98797	8.16417	3.64724	0.00060677	0.0161139	-0.56076
Npy5r	-5.21116	-0.444954	-3.64651	0.000608151	0.0161139	-0.986756
Sdhc	1.09876	6.90916	3.64578	0.00060953	0.0161139	-0.555379
Commd1	1.85754	4.25276	3.6451	0.000610802	0.0161191	-0.444196
C530005A16Rik	2.71532	1.87443	3.64423	0.000612457	0.0161376	-0.391151
Zswim8	-1.63051	7.1469	-3.63924	0.00062201	0.0163638	-0.577324
Eps8l1	-2.12203	2.66584	-3.63768	0.000625024	0.0163689	-0.378045
Dpf2	1.4158	5.2268	3.63764	0.000625105	0.0163689	-0.532294
Chsy1	1.66016	4.2482	3.63861	0.000623216	0.0163689	-0.462346
Clint1	-1.26701	5.73142	-3.63422	0.000631767	0.0164937	-0.569077
Rps6	1.27926	6.64485	3.63419	0.000631822	0.0164937	-0.585649
Nkap	-1.85531	4.61539	-3.63278	0.000634581	0.0164998	-0.516896
Hmbs	1.60351	4.05513	3.63239	0.000635353	0.0164998	-0.465031
Dzip1l	-1.35859	4.47907	-3.63208	0.00063596	0.0164998	-0.50835
Vsig10l	-2.8609	1.59171	-3.63245	0.000635227	0.0164998	-0.426311
Xpnpep1	1.12644	6.37134	3.63093	0.000638235	0.0165335	-0.59131
Utp14b	-1.5614	3.72592	-3.6266	0.000646839	0.0167308	-0.466846
Rbp4	-3.3745	2.83934	-3.6245	0.00065106	0.0167755	-0.421303
Slc6a9	-2.20659	5.00228	-3.62487	0.000650307	0.0167755	-0.564635
Krtcap3	-3.04562	0.674686	-3.62426	0.000651545	0.0167755	-0.618797
Nopchap1	-1.89026	5.86882	-3.62317	0.000653733	0.0168063	-0.605627
Braf	-2.41156	6.89341	-3.62222	0.000655668	0.0168305	-0.624036
Hdac3	0.823831	6.77597	3.62142	0.000657277	0.0168462	-0.623979
Prrg3	-1.7814	5.46247	-3.6179	0.000664475	0.0170049	-0.605728
Adra1b	-2.43804	3.37681	-3.61733	0.000665646	0.0170092	-0.470109
Mnt	-1.82755	5.7673	-3.61596	0.000668475	0.0170557	-0.622347
Pcdha12	-2.33048	3.74561	-3.6129	0.000674822	0.0171917	-0.508271
Slc10a3	2.69738	1.38261	3.61205	0.000676585	0.0171999	-0.54046
Rnf26	-2.1575	4.35855	-3.61177	0.000677176	0.0171999	-0.556847
Sel1l	-1.42968	7.35636	-3.60925	0.000682471	0.0173084	-0.664996
Gab2	-1.85386	6.36448	-3.60751	0.00068613	0.0173679	-0.659658
Dagla	-1.81487	6.04968	-3.60716	0.000686874	0.0173679	-0.654691
Cdk1	-9.53884	-1.25886	-3.60206	0.000697776	0.0174845	-1.46792
Slc16a14	-2.158	4.87928	-3.60306	0.000695633	0.0174845	-0.617891
Cct6a	1.1214	8.19168	3.60237	0.000697105	0.0174845	-0.689443
Enox2	-1.95366	4.15687	-3.60167	0.000698612	0.0174845	-0.571154
Slc35a4	1.25025	5.15007	3.60173	0.000698486	0.0174845	-0.63086
Vwc2	-2.38163	2.97845	-3.6038	0.000694045	0.0174845	-0.482453
Chd6	-1.34184	6.50655	-3.60162	0.00069872	0.0174845	-0.678028
Btf3	1.24987	6.57907	3.5993	0.000703732	0.0175064	-0.68457
Gad2	-2.07719	8.27795	-3.60073	0.000700644	0.0175064	-0.695298
Slc9a9	1.88264	3.78501	3.59954	0.000703222	0.0175064	-0.534636
Elmo1	-1.83911	7.58167	-3.59997	0.000702291	0.0175064	-0.693094
Eif4e3	1.64438	2.96291	3.59747	0.000707705	0.0175793	-0.491559
Irf2bpl	-1.90859	6.2924	-3.59441	0.000714428	0.0177203	-0.69615
Htr5a	-1.86897	4.0246	-3.59157	0.000720687	0.0178233	-0.589138
Tmc7	2.15625	3.72652	3.59173	0.00072034	0.0178233	-0.550396
Wbp4	1.00732	6.14102	3.58581	0.000733577	0.0181156	-0.715888
Ramp3	-3.27339	4.22627	-3.58473	0.000736022	0.0181495	-0.625688
Cbx4	-1.47804	4.93401	-3.5836	0.000738598	0.0181865	-0.676293
Rbm17	1.03707	5.85436	3.58294	0.000740091	0.0181968	-0.716668
Ilf2	0.949158	6.93467	3.58173	0.000742856	0.0182017	-0.738762
Rab11fip2	-1.34616	6.08102	-3.58198	0.000742286	0.0182017	-0.727012
Armcx6	-1.67805	4.60516	-3.58097	0.000744595	0.0182017	-0.662659
Ptcd3	1.18123	5.62373	3.58128	0.00074388	0.0182017	-0.712597
Lcn2	17.5745	-3.14569	3.57853	0.000750191	0.0182856	-3.19311
Kmt5a	1.57958	5.55041	3.57898	0.000749146	0.0182856	-0.711679
Adgra1	-1.51783	5.08357	-3.57693	0.000753886	0.0183492	-0.703559
Larp7	1.64741	3.84701	3.57512	0.000758088	0.0183848	-0.609007
Inpp5j	-2.43266	5.43121	-3.5749	0.000758608	0.0183848	-0.727618
Atp5k	1.72374	6.68908	3.57534	0.000757579	0.0183848	-0.753781
Psmd2	0.859261	8.33869	3.57329	0.000762366	0.0184495	-0.773122
Emx2os	-3.57845	1.24742	-3.57252	0.000764167	0.0184666	-0.617117
Col14a1	-4.34421	1.60707	-3.57062	0.000768641	0.0185483	-0.584435
Tulp3	1.21229	3.85179	3.56841	0.000773869	0.0186478	-0.629715
Celf6	-1.82564	6.15611	-3.56794	0.000774994	0.0186484	-0.768335
Gm10710	-6.48183	-0.677835	-3.56569	0.000780362	0.0187509	-1.25384
Zkscan16	2.79887	3.17632	3.56412	0.000784144	0.018815	-0.589306
Tmem115	-1.1409	5.08708	-3.56164	0.000790121	0.0189316	-0.746424
Arpc4	1.08866	6.42669	3.56082	0.000792116	0.0189525	-0.791808
Cracd	-1.47227	8.00162	-3.55756	0.000800069	0.0191158	-0.816438
Sec24a	-1.51574	4.50632	-3.55663	0.000802336	0.0191429	-0.721949
Rpl22	2.0033	7.63022	3.55426	0.000808187	0.0192553	-0.82228
Astn1	-1.66112	8.41855	-3.5522	0.000813307	0.0193136	-0.833801
Yipf2	-2.01045	3.12721	-3.55237	0.000812886	0.0193136	-0.631314
Srcap	-3.06344	2.22896	-3.55144	0.000815199	0.0193136	-0.604816
Tcp1	1.00742	7.71327	3.55185	0.000814174	0.0193136	-0.830054
Ntn4	-2.59639	2.46669	-3.54999	0.000818841	0.0193457	-0.609321
Cnn3	1.41429	5.57845	3.55026	0.000818156	0.0193457	-0.797541
Tfb2m	-1.72778	3.28792	-3.54923	0.000820731	0.0193633	-0.646799
L3mbtl1	-1.7051	3.71869	-3.54849	0.0008226	0.0193804	-0.683756
Gm4691	-7.05762	-0.725982	-3.54792	0.000824035	0.0193872	-1.3053
Pcdh17	-2.32853	7.27609	-3.54694	0.000826522	0.0194187	-0.841716
Celf4	-1.35551	8.24558	-3.54446	0.000832809	0.0195392	-0.854856
Ndufb10	1.06042	6.48446	3.54324	0.000835918	0.019585	-0.842398
Tab3	-1.62109	5.39711	-3.54171	0.00083984	0.0196497	-0.819149
Dennd10	-1.66112	5.05219	-3.53409	0.000859625	0.0200258	-0.822802
Exosc9	1.37245	5.43888	3.5328	0.000863019	0.0200258	-0.84087
Lrrc24	-1.75799	4.29255	-3.53347	0.000861263	0.0200258	-0.77241
Nrip3	1.91618	7.13383	3.53393	0.000860051	0.0200258	-0.875564
Rgs14	2.87553	2.8243	3.53314	0.000862133	0.0200258	-0.657741
Maf	-1.86698	5.54227	-3.53334	0.000861612	0.0200258	-0.84851
Mex3a	1.51585	5.72126	3.5316	0.000866191	0.0200719	-0.85565
Ptdss1	-1.68573	6.37216	-3.52994	0.000870581	0.0201035	-0.879251
Mad2l2	2.16415	3.65353	3.52968	0.000871291	0.0201035	-0.71484
Slc24a2	-2.67217	5.9789	-3.52929	0.00087231	0.0201035	-0.873654
Ptchd1	-1.74929	3.78281	-3.5297	0.000871242	0.0201035	-0.739261
Stard3nl	1.16097	6.15852	3.52698	0.000878485	0.020148	-0.882454
Cyth1	1.20784	5.95838	3.52781	0.000876257	0.020148	-0.874739
Fgf9	-1.69545	3.82089	-3.52679	0.000879005	0.020148	-0.752122
Pcdha6	-2.01755	3.28857	-3.52694	0.000878601	0.020148	-0.710826
Pde8b	-1.94771	4.90784	-3.52568	0.000881984	0.0201617	-0.838311
Ncoa6	-1.64704	6.49296	-3.52593	0.0008813	0.0201617	-0.891756
Ube2j1	-1.9661	7.00279	-3.524	0.000886519	0.020238	-0.903261
Tmem62	-1.3821	4.80457	-3.52239	0.000890871	0.0203099	-0.839166
Prkci	-1.93033	5.62248	-3.5205	0.00089604	0.0204003	-0.887127
Mipol1	3.02602	1.27021	3.51883	0.000900592	0.0204764	-0.794704
Psmc2	1.19958	6.48083	3.51828	0.000902123	0.0204836	-0.912438
Rnf41	-0.993223	6.88434	-3.51656	0.000906855	0.0205085	-0.923287
Trim21	9.69174	-1.44026	3.5168	0.000906193	0.0205085	-2.19718
Rpl9	1.35082	8.06254	3.5168	0.000906199	0.0205085	-0.931177
Sec14l1	-1.1512	7.32353	-3.51587	0.000908749	0.0205239	-0.929239
Mrpl49	1.18405	5.2788	3.51473	0.000911917	0.020568	-0.883783
Ap2m1	0.768679	9.09171	3.51412	0.000913606	0.0205786	-0.943321
Gm17396	-3.06253	1.56723	-3.51178	0.000920137	0.0206844	-0.737752
Gon7	2.11198	2.83465	3.51157	0.000920745	0.0206844	-0.717063
Ndufs5	1.75511	5.22836	3.50895	0.00092811	0.0208222	-0.895572
Eml1	1.2389	6.20443	3.50746	0.000932338	0.0208893	-0.938112
Gabrb1	-2.22166	7.42494	-3.50418	0.000941683	0.0210708	-0.9633
Pigc	1.38717	3.79153	3.50201	0.000947904	0.0210781	-0.807427
Rps20	1.72589	7.56936	3.50204	0.00094782	0.0210781	-0.969073
Cyb5b	-1.67986	7.75087	-3.5028	0.000945636	0.0210781	-0.969263
Parm1	-2.83695	5.09641	-3.50339	0.000943948	0.0210781	-0.912276
Lmbrd1	-1.59783	6.65973	-3.5019	0.000948241	0.0210781	-0.962062
Arhgap39	-1.42354	6.12672	-3.50078	0.000951465	0.021122	-0.956622
Nalf1	-1.5936	5.32333	-3.49949	0.000955193	0.021177	-0.933433
Nid1	-3.35381	1.37676	-3.49865	0.000957654	0.0212038	-0.784753
Raph1	-1.81633	6.72351	-3.4961	0.000965097	0.0212723	-0.978976
Carm1	-1.24862	5.76319	-3.49587	0.000965777	0.0212723	-0.961137
Slc35e2	-1.37761	5.69635	-3.49604	0.000965267	0.0212723	-0.957784
Cdh24	-2.18962	3.36744	-3.49687	0.000962825	0.0212723	-0.798235
Adam7	-10.8617	-3.77336	-3.494	0.000971269	0.0213654	-2.91676
Tshr	-2.71547	2.34358	-3.49334	0.000973228	0.0213807	-0.757896
6820431F20Rik	-2.15417	2.60395	-3.49276	0.000974923	0.0213901	-0.765229
Psmd11	0.989827	6.28244	3.49074	0.000980935	0.0214942	-0.98671
Pus7l	2.72113	1.95703	3.48982	0.000983682	0.0215265	-0.780953
Nudt14	2.5017	2.79801	3.48662	0.000993282	0.0216525	-0.781354
Acadvl	1.48298	3.99867	3.48677	0.000992813	0.0216525	-0.865807
Cited2	-2.66246	6.10566	-3.48677	0.000992828	0.0216525	-0.996371
Ulk2	1.17519	8.00204	3.48496	0.000998277	0.0217334	-1.02016
Cort	-4.61492	4.44181	-3.48316	0.00100376	0.0218247	-0.926594
E2f6	2.32849	4.13395	3.4818	0.00100789	0.0218864	-0.88713
Rps11	1.19032	6.88477	3.48081	0.00101092	0.0218987	-1.02251
Postn	-2.87491	3.59506	-3.48077	0.00101105	0.0218987	-0.862505
Car10	-1.93855	4.90418	-3.47815	0.00101911	0.0220451	-0.970171
Mast2	-2.11133	7.1662	-3.4773	0.00102174	0.0220737	-1.03608
Klf9	-1.80632	5.32887	-3.47658	0.00102398	0.0220939	-0.997509
Xiap	-1.5304	6.32809	-3.47438	0.00103082	0.0221849	-1.03419
Inpp5f	-1.60127	8.83034	-3.47455	0.00103028	0.0221849	-1.05375
Ubqln4	-1.13453	6.91074	-3.47301	0.00103509	0.0222346	-1.04551
Cdc42ep4	-1.70816	5.71968	-3.4728	0.00103576	0.0222346	-1.02486
Slc39a1	1.69501	4.90553	3.47183	0.00103879	0.0222715	-0.977003
Vwa5a	-2.744	4.04274	-3.47141	0.00104012	0.0222718	-0.922056
Kyat1	1.58519	3.7848	3.46905	0.00104759	0.0224034	-0.895988
Mis18a	2.45003	2.89773	3.46831	0.00104991	0.0224058	-0.834283
St8sia3	-1.32049	6.94701	-3.46818	0.00105036	0.0224058	-1.05949
Dck	1.31754	5.23751	3.46484	0.00106102	0.0226048	-1.01913
Haus8	1.52503	4.73706	3.46376	0.00106449	0.0226502	-0.988205
Pdxk	-1.51832	7.35827	-3.46182	0.00107075	0.022728	-1.08098
Pou3f3	-1.36571	6.88827	-3.46179	0.00107083	0.022728	-1.07672
Copg2	1.10479	6.28388	3.45995	0.00107681	0.0227722	-1.07242
Htatsf1	1.3378	6.31239	3.45991	0.00107695	0.0227722	-1.07292
Ccnd1	-2.55929	3.40939	-3.46058	0.00107476	0.0227722	-0.8999
Psmd13	1.20044	7.12647	3.45909	0.0010796	0.0227954	-1.08549
Tspyl5	-1.06546	6.10449	-3.45874	0.00108075	0.0227954	-1.07389
Fam222b	-1.82864	4.81441	-3.45694	0.00108666	0.0228347	-1.02269
Cstpp1	1.00364	6.29762	3.45707	0.00108622	0.0228347	-1.08069
Slc35c1	1.18399	4.4125	3.45715	0.00108597	0.0228347	-0.983
Hace1	-1.31223	4.7951	-3.45619	0.00108911	0.0228577	-1.02243
Wdfy1	-1.49892	4.0706	-3.45202	0.0011029	0.0231185	-0.977942
Cntfr	-1.69489	5.63847	-3.44765	0.00111753	0.0233603	-1.09015
Tceanc2	1.27306	4.71008	3.44735	0.00111857	0.0233603	-1.03267
Hs3st1	-2.16372	5.83966	-3.44789	0.00111674	0.0233603	-1.09814
Armc10	1.45313	5.02439	3.44679	0.00112043	0.0233702	-1.0562
Plp1	3.08351	2.01026	3.44612	0.00112271	0.023389	-0.888393
LTO1	1.13239	4.18796	3.44304	0.00113317	0.0235778	-1.00315
Pcdhac1	-3.20566	1.54546	-3.441	0.00114018	0.0236945	-0.915865
Ubiad1	1.44423	3.8038	3.43855	0.00114864	0.023841	-0.981124
Vip	-5.47581	2.46643	-3.43792	0.00115082	0.023857	-0.905481
Cdk4	1.11315	6.01288	3.43714	0.00115351	0.0238834	-1.12954
Prkag2	1.30216	6.76302	3.4357	0.00115854	0.0239583	-1.14661
Gm16210	-9.84151	-2.04532	-3.43513	0.00116053	0.0239701	-2.14426
Slc4a3	-1.60613	7.37366	-3.43459	0.00116241	0.0239797	-1.15684
Adh5	1.58774	6.69932	3.43261	0.00116934	0.0240932	-1.15411
Fermt2	1.06719	5.47368	3.43196	0.00117163	0.0241111	-1.12338
Cdc42bpg	3.04082	1.66906	3.43122	0.00117425	0.0241357	-0.94943
Tmem108	-1.37569	4.69473	-3.43064	0.00117631	0.0241486	-1.08542
Tspyl4	-1.44982	8.87673	-3.42988	0.00117901	0.0241746	-1.17819
Chd1l	1.94121	2.06704	3.42762	0.00118702	0.0242974	-0.930593
Eif5a	0.952983	8.71049	3.42739	0.00118786	0.0242974	-1.18422
Nectin1	-1.62787	6.49479	-3.42549	0.00119468	0.0244072	-1.17275
Plekhb2	-1.08108	8.26514	-3.42407	0.00119978	0.0244819	-1.19168
Zfp346	-1.06548	5.64867	-3.42313	0.00120316	0.0245212	-1.15899
H2-Bl	-4.98881	-0.1431	-3.42209	0.00120693	0.0245685	-1.32742
Cplx1	-1.80751	8.9923	-3.42163	0.00120861	0.0245732	-1.20129
Recql4	-3.71159	1.70928	-3.41934	0.00121696	0.0246539	-0.955783
Coil	1.29709	4.98293	3.4198	0.00121527	0.0246539	-1.12808
Hs6st1	-1.25432	6.42408	-3.41967	0.00121577	0.0246539	-1.18784
Ssrp1	0.938918	7.0119	3.41881	0.00121888	0.0246633	-1.19616
Tubd1	2.49015	2.5127	3.41431	0.00123547	0.0248504	-0.962696
Ppp1r13b	-1.01152	6.46963	-3.41444	0.00123498	0.0248504	-1.2026
Fam118a	1.60912	4.53777	3.4154	0.00123144	0.0248504	-1.10549
Slc9a1	-1.62207	5.194	-3.41505	0.00123271	0.0248504	-1.161
Zmat4	2.35869	4.93292	3.41543	0.00123134	0.0248504	-1.12602
Pus7	1.38684	4.49253	3.41287	0.00124084	0.0249287	-1.11021
Ndufa10	1.17792	7.01952	3.41058	0.00124938	0.0250706	-1.21888
Man1b1	0.88418	6.28093	3.40852	0.00125713	0.0251687	-1.21437
Lyar	1.53937	3.45123	3.40849	0.00125724	0.0251687	-1.03177
Rab3c	-3.73483	9.71135	-3.40789	0.00125951	0.0251797	-1.24035
Ankrd50	-2.08921	6.99755	-3.40716	0.00126226	0.0251797	-1.22948
Pomgnt2	-1.46813	5.24431	-3.40738	0.00126144	0.0251797	-1.18375
Eif3m	1.85244	6.56064	3.40656	0.00126451	0.0251949	-1.22411
Ppp1r3d	1.668	3.95404	3.40404	0.0012741	0.0253561	-1.08374
Eya4	-3.1689	0.656559	-3.40279	0.0012789	0.0253993	-1.14728
1110004F10Rik	1.00309	7.12278	3.40269	0.00127928	0.0253993	-1.24173
Trmt5	1.72677	3.32796	3.40151	0.00128379	0.0254425	-1.03982
Mkx	-1.86321	2.85393	-3.40134	0.00128446	0.0254425	-1.01804
Skp1	1.58208	8.82404	3.40033	0.00128835	0.0254897	-1.2593
Elavl3	-1.21917	8.86564	-3.39913	0.00129298	0.0255375	-1.2631
Immp2l	3.00833	1.41382	3.39893	0.00129378	0.0255375	-1.05681
Gatm	2.129	5.51594	3.3983	0.0012962	0.0255553	-1.21557
Rbbp4	1.25335	7.22763	3.39635	0.00130379	0.025675	-1.26007
Rnf7	1.40063	6.19602	3.39565	0.00130655	0.0256996	-1.24813
Trim8	-1.9578	5.96748	-3.39412	0.00131254	0.0257574	-1.24923
Tmem178b	-1.51014	8.40663	-3.39427	0.00131195	0.0257574	-1.27472
Wnk3	-1.71666	5.8068	-3.39365	0.00131436	0.0257633	-1.24156
Gmpr	1.35753	4.46267	3.39263	0.0013184	0.0257826	-1.16268
Phactr3	-1.60704	6.78448	-3.39295	0.00131713	0.0257826	-1.26533
Tsnax	1.1805	6.97632	3.39055	0.00132664	0.025914	-1.27357
Naa40	1.09905	5.54924	3.389	0.00133279	0.0260041	-1.24554
Adgra2	-2.08725	2.09097	-3.38706	0.00134055	0.0261254	-1.03054
Atf2	-1.43205	6.78545	-3.38508	0.0013485	0.02625	-1.28769
Shtn1	1.12295	7.78314	3.38143	0.00136327	0.026507	-1.30566
Gm3362	5.48908	-0.375923	3.38102	0.00136494	0.026509	-1.6789
Ppp1r14a	-11.0379	-3.05605	-3.38045	0.00136728	0.0265122	-2.72432
Smg7	-1.63882	6.44385	-3.38021	0.00136824	0.0265122	-1.29615
Erc2	-1.45824	7.69571	-3.37979	0.00136998	0.0265155	-1.31034
Slc31a2	2.17799	2.41139	3.37856	0.00137499	0.0265821	-1.05308
Heca	-1.46323	5.33514	-3.37807	0.001377	0.0265906	-1.26964
Rhou	2.01079	5.79246	3.37691	0.00138178	0.0266525	-1.28679
Pclo	-2.46262	8.28143	-3.37621	0.00138468	0.0266542	-1.32381
Nudt10	2.36842	4.35142	3.37613	0.00138502	0.0266542	-1.19299
Pecr	2.23056	2.60798	3.37471	0.00139089	0.0267367	-1.06739
Nat10	1.08689	5.07162	3.3721	0.00140177	0.0269153	-1.26536
Trim17	-2.58768	2.66298	-3.37135	0.00140492	0.0269451	-1.08674
Map3k9	-2.38481	7.51411	-3.37065	0.00140785	0.0269708	-1.33423
Pianp	-1.55546	5.77471	-3.37003	0.00141042	0.0269895	-1.30856
Rgs16	-2.14093	3.50704	-3.36944	0.00141291	0.0270066	-1.15312
Crtc1	-1.54756	6.58098	-3.36811	0.00141853	0.0270223	-1.33168
Vps18	-1.32076	5.57853	-3.3683	0.00141773	0.0270223	-1.30759
Ms4a15	-9.14956	-1.18077	-3.36875	0.00141585	0.0270223	-1.82732
Mtres1	1.23153	4.14521	3.36675	0.00142429	0.0271016	-1.20636
Pknox2	-1.35793	6.10094	-3.36628	0.00142631	0.0271095	-1.328
Mei1	10.2034	-1.97212	3.3657	0.00142878	0.027126	-2.64815
Trim36	-1.48847	3.8382	-3.36288	0.00144081	0.0273236	-1.1989
Dnm2	1.17944	5.74056	3.361	0.00144889	0.0274462	-1.33
Cntnap4	-3.20132	6.33401	-3.35993	0.00145354	0.0275035	-1.3498
Vps33a	-0.988613	6.58239	-3.35802	0.0014618	0.0276288	-1.35876
Cnnm4	-1.52448	4.37053	-3.35676	0.00146732	0.0277022	-1.26095
Ovca2	2.2993	2.54327	3.35507	0.00147471	0.0278108	-1.1163
Gm21092	-1.69017	4.42366	-3.35433	0.00147795	0.0278407	-1.27314
Zmat2	1.44343	7.02858	3.35109	0.00149223	0.0280768	-1.38204
Gnai2	-1.56695	6.74783	-3.35033	0.00149562	0.0280768	-1.38201
Abcd2	-2.07312	3.07319	-3.34999	0.00149712	0.0280768	-1.16757
Ankrd39	-2.1508	2.48856	-3.35072	0.00149391	0.0280768	-1.13184
Ddx17	-0.895519	8.59981	-3.34857	0.00150346	0.0281645	-1.40083
Utp4	1.20222	4.4694	3.34774	0.00150719	0.0282032	-1.28556
Ptpdc1	1.03312	4.60285	3.34713	0.00150991	0.0282227	-1.29851
Slc24a4	-2.6369	3.95624	-3.34676	0.00151157	0.0282227	-1.25654
Mgat5	-1.68407	6.85372	-3.34548	0.00151735	0.0282993	-1.39682
Cox6a2	-3.51431	3.62652	-3.34498	0.00151957	0.0283095	-1.22958
Insig1	-1.53451	7.16866	-3.34413	0.00152345	0.0283194	-1.40365
Mab21l1	-5.25182	-0.734877	-3.34439	0.00152226	0.0283194	-1.71328
Denr	1.12626	5.80621	3.34331	0.00152715	0.028357	-1.38059
Nisch	-1.09933	9.05997	-3.34081	0.00153849	0.0284739	-1.42351
Exosc2	1.23711	4.53412	3.34109	0.00153722	0.0284739	-1.30807
Zfp773	2.10854	1.93188	3.34147	0.0015355	0.0284739	-1.15066
Mrps35	1.23311	4.85586	3.34001	0.00154218	0.028511	-1.33663
Cdc34	1.60319	5.54271	3.33928	0.0015455	0.0285411	-1.37981
Eif4e2	0.865325	6.53923	3.33774	0.00155257	0.0285781	-1.41282
Ptges2	1.07144	5.89399	3.33833	0.00154989	0.0285781	-1.39722
Slc2a13	-2.29076	6.05402	-3.33794	0.00155167	0.0285781	-1.40557
Igsf1	-3.04835	2.38584	-3.33724	0.0015549	0.02859	-1.16344
Tmem196	-2.15963	2.02645	-3.33624	0.00155949	0.0286431	-1.15881
Mmp9	-2.9757	0.773226	-3.33393	0.00157023	0.0287467	-1.27378
Ddit4	2.8881	7.35683	3.33433	0.00156837	0.0287467	-1.42981
Bag2	1.31804	4.56644	3.33405	0.00156966	0.0287467	-1.32956
B4galt3	1.07687	5.08959	3.3325	0.00157688	0.0288062	-1.37375
Pde11a	-4.61455	0.131793	-3.33265	0.00157619	0.0288062	-1.42085
Fbxl20	-1.1261	5.81935	-3.33111	0.00158341	0.0288943	-1.41655
Sfxn5	-1.65458	5.13746	-3.3297	0.00159002	0.0289836	-1.39023
Pcdha5	-1.72371	3.88285	-3.32913	0.00159273	0.0290017	-1.29348
Pip4k2c	1.15338	5.2851	3.32394	0.0016174	0.0293876	-1.40829
Nfxl1	-1.70339	4.13624	-3.32419	0.00161621	0.0293876	-1.33008
Mettl16	-1.52854	5.53481	-3.32346	0.0016197	0.0293978	-1.42784
Col18a1	-2.72976	1.75147	-3.32215	0.00162599	0.0294804	-1.19796
Anxa7	0.927687	6.11697	3.32094	0.00163181	0.0295542	-1.4508
Gtpbp1	-1.03185	5.938	-3.31863	0.00164299	0.029725	-1.4531
Fbxo34	-1.33294	5.24085	-3.31738	0.00164906	0.0298028	-1.429
Map3k14	-2.25067	2.39542	-3.31679	0.00165193	0.029823	-1.21499
Scrt2	1.9072	4.4532	3.31605	0.00165557	0.0298567	-1.36497
Mtrex	1.15394	6.29729	3.31396	0.00166584	0.0298826	-1.47328
Efcab2	-2.21287	3.78093	-3.31399	0.0016657	0.0298826	-1.32493
Ugt8a	-4.40738	0.639511	-3.31406	0.00166533	0.0298826	-1.33098
Dhx29	0.989978	5.69504	3.31424	0.00166444	0.0298826	-1.45538
Gm5113	-1.22402	5.38238	-3.31519	0.00165978	0.0298826	-1.44045
Mllt1	-1.17327	6.87951	-3.31348	0.00166817	0.0298928	-1.48376
Acap3	1.41628	7.67902	3.31211	0.00167494	0.0299823	-1.49376
Rnf180	1.44979	3.68923	3.31105	0.0016802	0.030026	-1.31098
Ero1a	1.98131	5.12247	3.31019	0.00168448	0.030026	-1.42932
Sos1	-1.6178	6.57077	-3.31049	0.00168302	0.030026	-1.48833
Eif3b	1.07228	7.23533	3.3102	0.00168443	0.030026	-1.49538
Akirin1	1.29056	6.01909	3.30767	0.00169705	0.0301918	-1.48339
Rab27a	3.91178	0.943157	3.30761	0.00169735	0.0301918	-1.36343
Myof	-3.55153	2.78192	-3.30657	0.00170258	0.030253	-1.26445
Lama4	-3.44508	2.0133	-3.305	0.00171052	0.0303075	-1.23702
Sema5a	-1.76994	5.21869	-3.30543	0.00170832	0.0303075	-1.46074
2810025M15Rik	1.46071	4.33898	3.3049	0.00171102	0.0303075	-1.38744
Gm17999	-10.9199	-3.38013	-3.30447	0.00171315	0.0303134	-2.93331
Gtf2f1	1.44379	5.77631	3.30135	0.00172901	0.0304991	-1.49238
Nog	-2.92534	1.71921	-3.3016	0.00172772	0.0304991	-1.24874
Slc22a21	-2.31221	2.03939	-3.30134	0.00172905	0.0304991	-1.24606
Gca	-2.00521	3.11313	-3.29899	0.00174109	0.0306212	-1.30183
Mrpl9	1.1495	6.03042	3.29893	0.0017414	0.0306212	-1.5078
Cog4	0.936648	6.07825	3.299	0.00174101	0.0306212	-1.50887
Nars	-1.60872	8.09662	-3.29792	0.0017466	0.0306489	-1.5359
Pam	-2.3628	7.68474	-3.29803	0.00174602	0.0306489	-1.53321
Dip2b	-1.73544	5.94371	-3.29603	0.00175633	0.0307876	-1.5162
Nedd4l	-1.07062	6.78726	-3.29366	0.00176867	0.0309718	-1.53637
Tcerg1l	-1.60999	4.04364	-3.29326	0.00177074	0.030976	-1.40388
Vdac2	1.13589	7.37459	3.2911	0.00178204	0.0311416	-1.54826
Tor1aip2	1.00565	6.0257	3.2907	0.00178412	0.0311457	-1.52971
Rab3b	-1.31076	6.9076	-3.28905	0.00179284	0.0312131	-1.55019
B3gnt5	-2.64739	4.60655	-3.28892	0.00179352	0.0312131	-1.46364
Naca	1.58319	7.47723	3.28952	0.00179031	0.0312131	-1.55318
Rpl4	1.14714	9.32086	3.28775	0.00179967	0.0312879	-1.56782
Ptprh	3.02475	1.08846	3.28737	0.00180168	0.0312908	-1.36965
Psmb10	-1.80319	4.62602	-3.28414	0.00181888	0.0315571	-1.47829
Trim46	-1.19566	6.89612	-3.28344	0.00182264	0.0315877	-1.56518
Cndp1	-11.1519	-2.95124	-3.28312	0.00182438	0.0315877	-2.77423
Ddr2	-3.78109	3.29546	-3.28136	0.00183383	0.031719	-1.36971
Adarb1	-1.24296	6.8474	-3.27971	0.00184274	0.031808	-1.57474
Scamp2	1.68222	3.83674	3.27999	0.00184123	0.031808	-1.40564
Arl5a	1.81092	7.11326	3.27917	0.00184566	0.0318259	-1.57758
9430038I01Rik	2.5382	1.59382	3.27856	0.001849	0.031851	-1.32137
Map1a	-1.57138	9.46488	-3.27751	0.00185472	0.0319169	-1.59573
Gtf3c5	1.10771	4.605	3.27694	0.00185779	0.0319373	-1.48607
Cmbl	3.00129	1.1509	3.27532	0.00186665	0.0319598	-1.38645
Cat	1.66953	5.75138	3.27541	0.00186614	0.0319598	-1.56099
Disp2	-1.39325	8.05704	-3.27588	0.00186362	0.0319598	-1.59514
Isg20l2	1.14977	4.24483	3.27602	0.00186281	0.0319598	-1.45737
Gabrr2	-5.67746	-1.00166	-3.27455	0.00187089	0.032	-1.94633
Eif1ad	1.14328	5.04635	3.27307	0.00187903	0.0320366	-1.53045
Rgs10	-1.74775	4.82829	-3.2733	0.00187778	0.0320366	-1.52287
Lrrc4	-1.24558	6.31894	-3.27279	0.0018806	0.0320366	-1.58635
Fam78a	4.74614	0.213462	3.27332	0.00187763	0.0320366	-1.65871
Hsd17b11	-1.44952	3.64137	-3.27193	0.00188535	0.0320852	-1.42205
Ddt	2.30043	2.33178	3.26846	0.0019046	0.0322182	-1.32956
Pdzd4	0.99745	7.59583	3.26957	0.00189842	0.0322182	-1.60812
Atl1	0.851754	6.85099	3.26912	0.00190095	0.0322182	-1.60228
Fbxo16	1.49177	3.25388	3.26873	0.00190309	0.0322182	-1.38277
Rpl7	1.93426	8.69385	3.26949	0.00189889	0.0322182	-1.61492
Mppe1	2.27193	1.5814	3.27004	0.00189584	0.0322182	-1.34292
Coq9	1.2393	5.85155	3.26772	0.00190875	0.0322562	-1.58577
Ybx1	1.42852	9.63636	3.26726	0.00191132	0.0322674	-1.62345
Trim24	-1.01669	5.57648	-3.26522	0.0019228	0.0324289	-1.5854
Eef1b2	1.59951	7.83798	3.26464	0.00192608	0.0324517	-1.62297
Homez	1.64967	3.56173	3.26397	0.00192988	0.0324834	-1.42168
Tipin	1.81999	3.33827	3.26344	0.00193289	0.0325018	-1.40211
Gm8292	2.35916	3.36626	3.26303	0.00193517	0.0325078	-1.40405
Wdr59	-1.22357	5.59358	-3.26251	0.00193815	0.0325163	-1.59392
Igdcc4	-1.48225	5.59586	-3.26227	0.00193952	0.0325163	-1.59413
Abcb1b	3.12032	0.68401	3.26173	0.00194256	0.0325349	-1.50365
Tnfaip1	-1.67037	6.50383	-3.26065	0.00194871	0.0325413	-1.62186
Lynx1	-2.32008	5.182	-3.26117	0.00194576	0.0325413	-1.57747
Sstr2	-3.25454	4.15772	-3.26098	0.00194687	0.0325413	-1.50428
Slc25a35	3.1397	0.724046	3.25946	0.00195555	0.0325913	-1.49813
Exoc6b	-1.22834	6.52681	-3.25973	0.00195398	0.0325913	-1.62443
Smu1	1.16592	6.28605	3.25885	0.00195906	0.0326066	-1.62137
Rpl27	1.23721	5.96732	3.25862	0.00196033	0.0326066	-1.61419
Med13l	-1.76553	6.16648	-3.2559	0.00197603	0.0328355	-1.62601
Tmem26	-8.85379	-2.61201	-3.25454	0.00198391	0.0329341	-2.67794
Anxa2	3.25647	2.96035	3.24872	0.00201798	0.0334668	-1.4046
Asphd1	-1.89352	4.79567	-3.24748	0.00202532	0.0335557	-1.58879
Med12l	-2.1845	4.99575	-3.24613	0.00203331	0.0336551	-1.60476
St3gal2	-1.75402	6.42222	-3.24497	0.0020402	0.0337182	-1.66236
Slc7a14	-1.41948	6.72326	-3.24482	0.00204111	0.0337182	-1.66681
Lrrc42	1.25958	4.54134	3.24404	0.00204574	0.0337488	-1.5671
Ppargc1a	-1.97481	6.18128	-3.24384	0.00204695	0.0337488	-1.66108
2810013P06Rik	2.08111	3.87881	3.24315	0.00205111	0.0337844	-1.50431
Parg	1.14226	5.58041	3.24229	0.00205627	0.0338365	-1.64308
P3h2	-5.11627	-0.340661	-3.24157	0.00206057	0.0338511	-1.74736
Nap1l4	0.928771	7.57828	3.24147	0.00206116	0.0338511	-1.68327
Ttbk2	-1.43574	6.74446	-3.24103	0.00206386	0.0338626	-1.67729
Cyb5r3	-1.71419	6.70958	-3.23964	0.00207224	0.0339146	-1.68057
Pcnx	-1.62333	7.24039	-3.2395	0.00207305	0.0339146	-1.68659
Calca	-3.33613	1.42484	-3.24016	0.0020691	0.0339146	-1.40916
Mafb	-1.66641	3.19282	-3.23899	0.00207616	0.0339326	-1.46489
Psma6	1.57725	6.95184	3.2377	0.00208399	0.0339801	-1.68711
Cript	1.6912	6.06723	3.23778	0.00208349	0.0339801	-1.67197
Pcdh10	-1.16793	7.79403	-3.23724	0.00208681	0.0339801	-1.69691
Asap2	-1.23252	5.11273	-3.2371	0.00208767	0.0339801	-1.63669
Aak1	-1.26939	8.13969	-3.23686	0.00208911	0.0339801	-1.70019
Natd1	-1.86406	4.02403	-3.23622	0.00209301	0.0340109	-1.54727
Nrxn1	-1.66263	8.74128	-3.23525	0.00209897	0.0340565	-1.70737
Sema3d	-2.97401	3.17542	-3.2351	0.00209984	0.0340565	-1.47786
Gclm	-1.33238	5.22698	-3.23374	0.00210823	0.034145	-1.65215
Zmym3	-0.755323	7.59232	-3.23356	0.00210934	0.034145	-1.70513
Zhx2	-2.02113	4.09281	-3.23295	0.0021131	0.0341733	-1.569
Tcf12	-1.26197	5.54643	-3.23108	0.00212461	0.0343265	-1.67528
Epb41l2	-1.60369	5.26116	-3.22975	0.00213291	0.0343498	-1.66531
Ctnnbl1	1.0348	4.95801	3.2294	0.00213505	0.0343498	-1.64033
Rpl28	1.08529	6.61385	3.22922	0.0021362	0.0343498	-1.70581
Trps1	-1.79032	3.91892	-3.22934	0.00213544	0.0343498	-1.56002
Amy1	1.87939	4.23064	3.23044	0.00212858	0.0343498	-1.57232
Plod2	1.85988	4.17448	3.22842	0.00214117	0.034397	-1.57035
Arhgef40	-1.52375	4.02331	-3.22768	0.00214581	0.0344062	-1.57311
Smad5	-1.28034	5.14666	-3.2278	0.00214503	0.0344062	-1.66235
Creb3l1	-2.51664	3.32556	-3.22703	0.00214985	0.0344383	-1.51117
Gpkow	1.0069	5.97605	3.22608	0.00215583	0.0344689	-1.7014
Ccdc58	2.44517	3.65387	3.2263	0.00215444	0.0344689	-1.52431
Rab5if	1.52077	3.8806	3.22286	0.00217614	0.0347606	-1.56092
Gria3	-1.31198	5.98684	-3.22058	0.00219059	0.0349256	-1.71792
Bcl9	-1.3477	5.97041	-3.22079	0.00218926	0.0349256	-1.71714
Dgcr2	-1.16578	6.58646	-3.2198	0.00219562	0.0349706	-1.73155
Pcdhb22	-1.22377	4.53057	-3.21949	0.00219755	0.0349706	-1.64012
Snrpe	2.16291	5.13848	3.21899	0.00220076	0.0349888	-1.6768
Vamp1	1.89473	4.02629	3.21755	0.00221004	0.0350544	-1.5858
E130112N10Rik	1.89473	4.02629	3.21755	0.00221004	0.0350544	-1.5858
Gak	-1.40141	6.65514	-3.21738	0.0022111	0.0350544	-1.73895
Cbfa2t3	-2.54722	3.81768	-3.21644	0.00221713	0.0350608	-1.58462
Mrpl44	1.04723	4.19898	3.21635	0.00221772	0.0350608	-1.61066
Morn4	0.93529	7.26125	3.21659	0.0022162	0.0350608	-1.74675
Tcof1	-1.51419	4.55061	-3.21537	0.00222408	0.0351284	-1.65214
Rps10	1.28393	6.93292	3.21411	0.00223224	0.0352244	-1.74986
Gatd3a	1.22648	6.26275	3.21328	0.00223761	0.0352763	-1.74203
2810001G20Rik	2.15366	3.15474	3.21215	0.002245	0.0353599	-1.51693
Cd24a	2.73703	8.05687	3.21159	0.00224864	0.0353842	-1.76572
Dynll1	1.46204	7.73771	3.21009	0.00225846	0.0355057	-1.76789
Gtdc1	1.09844	4.95247	3.20954	0.00226205	0.0355291	-1.69215
Ccdc117	-2.02634	3.97181	-3.20916	0.00226455	0.0355354	-1.6193
Ret	-2.11748	3.87694	-3.20689	0.00227954	0.0357375	-1.6137
Narf	1.58981	7.80362	3.2057	0.00228741	0.0358276	-1.77996
Dnd1	-3.71507	0.33678	-3.20448	0.00229555	0.0359219	-1.63556
Spata2l	-2.11027	4.47242	-3.20347	0.00230229	0.035994	-1.68043
Ppp3ca	1.72344	8.1316	3.20172	0.00231398	0.0361434	-1.79276
Gga2	1.17038	5.65557	3.20053	0.00232202	0.0362355	-1.75692
Mgat4b	1.22738	6.79498	3.1998	0.00232692	0.0362785	-1.786
Slc39a9	-1.33866	5.87191	-3.19929	0.00233037	0.0362988	-1.77151
Vkorc1l1	0.879602	6.83377	3.19881	0.00233362	0.036316	-1.7894
Cdc25a	-1.56007	3.34127	-3.19766	0.00234139	0.03637	-1.58483
Gm19410	-3.30095	4.24534	-3.19784	0.00234017	0.03637	-1.67856
Wdr53	1.53209	3.10964	3.19625	0.00235098	0.0364854	-1.55637
Perp	2.77363	1.68955	3.19334	0.00237089	0.0367607	-1.519
Ube2j2	1.03613	5.16879	3.19221	0.00237872	0.0368166	-1.75295
Creg1	-1.13433	4.75992	-3.19219	0.00237884	0.0368166	-1.73071
Mcat	1.31109	4.87541	3.1917	0.00238218	0.0368345	-1.73229
Marchf8	1.1089	6.78093	3.19113	0.00238616	0.0368602	-1.80886
Gabrq	-2.64252	2.14629	-3.19083	0.0023882	0.0368602	-1.52151
Ckap2l	-3.71078	0.617301	-3.18942	0.00239797	0.0369773	-1.61388
Arpc2	1.01807	7.78479	3.18727	0.00241294	0.0371403	-1.82884
Prdm15	-1.05528	4.41936	-3.18758	0.00241078	0.0371403	-1.71387
Mtf2	1.7549	4.79792	3.18572	0.00242381	0.0372738	-1.73994
Bcas2	0.938561	6.05984	3.1837	0.00243799	0.0374238	-1.8161
Fam168b	-1.04212	8.56181	-3.18388	0.00243672	0.0374238	-1.843
Ttc19	1.38291	6.43063	3.18292	0.00244354	0.037475	-1.82558
Mfsd11	1.21767	5.09796	3.18219	0.00244871	0.0374904	-1.77418
Gdf7	-10.315	-3.77345	-3.18215	0.00244898	0.0374904	-3.21611
Coq10a	0.984909	5.45055	3.18155	0.00245323	0.0375216	-1.79781
Gdap1l1	-0.941245	7.01844	-3.1806	0.00245999	0.0375909	-1.84047
Ppp1r9a	-1.34818	6.96058	-3.17907	0.00247087	0.0377232	-1.84391
Mad1l1	1.94304	3.60582	3.17854	0.00247468	0.0377472	-1.64489
Thap11	1.02667	4.41967	3.17821	0.00247703	0.0377491	-1.73072
Gtf2e1	0.918786	5.90473	3.17495	0.00250046	0.0380533	-1.83436
Mrps23	1.0964	5.50609	3.17418	0.00250599	0.0380533	-1.81976
Vash2	1.11773	5.50339	3.17433	0.00250493	0.0380533	-1.81875
Tll1	-3.0857	2.98748	-3.17468	0.00250242	0.0380533	-1.61588
Angpt2	-6.62202	-1.38537	-3.17365	0.00250985	0.0380777	-2.26742
Cdkn1a	1.56513	7.20159	3.17239	0.00251901	0.0381141	-1.86271
Akap12	-1.34372	5.88514	-3.17248	0.00251834	0.0381141	-1.84158
Sema3b	4.02006	0.356091	3.17269	0.00251681	0.0381141	-1.788
Slc38a2	-1.5908	6.65837	-3.17202	0.00252167	0.0381203	-1.85917
Bcl6b	2.98987	1.52359	3.17155	0.00252507	0.0381376	-1.5828
Zfp663	5.60151	0.0129886	3.17085	0.00253022	0.0381812	-1.93076
Psmb7	1.55384	6.57612	3.1694	0.00254085	0.0383075	-1.86333
Sec22b	-1.0026	6.15426	-3.16819	0.00254973	0.0384072	-1.86051
Gm15825	-4.60037	-0.515322	-3.16749	0.00255485	0.03845	-1.96739
Brk1	1.13521	7.03116	3.16475	0.00257512	0.0387206	-1.88131
Numbl	-1.65696	6.45471	-3.16421	0.00257912	0.0387464	-1.87662
Mtfr2	-8.42137	-2.23583	-3.16285	0.00258925	0.0388641	-2.63234
Nrxn2	-1.435	9.08642	-3.15932	0.00261573	0.0391919	-1.90953
Ptprz1	-1.80617	7.76026	-3.15944	0.00261481	0.0391919	-1.90284
Mapkapk3	2.13737	2.08924	3.15356	0.00265944	0.0398088	-1.60672
Nhsl2	-2.00124	4.14312	-3.15328	0.00266161	0.0398088	-1.77936
Fam229b	2.1445	3.76248	3.15215	0.0026703	0.0399035	-1.72802
Tpcn2	-3.63463	-0.13996	-3.15081	0.00268059	0.040022	-1.88273
Snx6	1.58197	6.2872	3.14949	0.00269078	0.0400953	-1.91021
Kif21a	1.11322	7.13917	3.14925	0.00269261	0.0400953	-1.92314
Fbxl2	-0.862149	5.51287	-3.14953	0.00269051	0.0400953	-1.88864
Zbtb41	-1.48654	5.55762	-3.14872	0.00269676	0.0401217	-1.89283
Ncbp2	1.21143	5.64601	3.14807	0.00270176	0.0401608	-1.89449
Zyx	-2.31386	5.05376	-3.14499	0.00272583	0.0404475	-1.87683
Tmem229b	0.730476	7.00102	3.14523	0.00272397	0.0404475	-1.93242
Med6	1.90787	4.06592	3.14405	0.00273317	0.0404638	-1.78043
Barx2	2.48363	2.04391	3.14413	0.00273258	0.0404638	-1.6287
Gemin5	1.17828	5.13865	3.14393	0.0027341	0.0404638	-1.87688
Ttc9	-0.983842	5.66459	-3.14358	0.00273684	0.0404689	-1.91064
Epc1	-0.935104	5.65253	-3.14325	0.00273946	0.0404722	-1.91073
P3h1	-1.86814	3.11209	-3.1421	0.00274852	0.0405706	-1.70692
Utp3	1.04993	4.93674	3.14134	0.00275453	0.0406239	-1.86962
Adamts20	-1.91859	3.39512	-3.14031	0.00276271	0.0406997	-1.73898
Plekhn1	-1.83549	2.2176	-3.14009	0.00276448	0.0406997	-1.6477
Nmbr	-2.26078	2.7595	-3.13817	0.00277971	0.0407126	-1.68633
1700016L04Rik	-2.26078	2.7595	-3.13817	0.00277971	0.0407126	-1.68633
Septin10	3.70124	0.574321	3.13756	0.00278461	0.0407126	-1.7988
Taf5	1.42495	3.4254	3.13759	0.00278431	0.0407126	-1.73442
Gpr35	-4.91642	0.171912	-3.13907	0.00277255	0.0407126	-1.80952
Ccdc50	-1.59703	7.65247	-3.13793	0.00278167	0.0407126	-1.95824
Zmiz2	-1.73004	7.77101	-3.1396	0.00276829	0.0407126	-1.95485
Ddx24	0.952412	6.99533	3.13894	0.00277354	0.0407126	-1.94869
Tmem266	-1.23326	4.54693	-3.13618	0.00279567	0.0408074	-1.85887
Tmie	4.48317	1.42999	3.13614	0.00279592	0.0408074	-1.67504
Dctn4	-0.994769	7.14757	-3.13421	0.00281144	0.0409632	-1.96343
Shisa4	-1.01177	5.88659	-3.13429	0.00281082	0.0409632	-1.9421
Vat1	1.47808	7.81161	3.13326	0.00281912	0.0410398	-1.9703
Smarce1	0.913453	6.50936	3.13231	0.00282681	0.0411164	-1.95987
Pde5a	-2.29551	1.77412	-3.13065	0.00284028	0.0412768	-1.66059
Pcnx2	-1.12093	4.90827	-3.12945	0.00285006	0.0413834	-1.90505
Pitpnm1	-1.38956	7.29816	-3.12815	0.00286077	0.0415032	-1.9809
Lacc1	-3.75435	0.219996	-3.12724	0.0028682	0.0415754	-1.82672
Lyrm9	0.876583	6.47915	3.12693	0.00287076	0.0415768	-1.97345
Sv2c	-2.41762	5.96466	-3.12649	0.00287438	0.0415937	-1.9659
Ppil4	1.13746	5.74924	3.12588	0.00287943	0.0415955	-1.95687
Smim45	1.33986	5.72634	3.12609	0.0028777	0.0415955	-1.9545
Cadm3	-0.970885	9.15362	-3.12411	0.002894	0.0417348	-2.00184
Tbc1d9	-1.03336	8.16856	-3.12433	0.00289222	0.0417348	-1.99723
Strip2	-2.17824	5.45576	-3.12322	0.00290139	0.0418057	-1.95278
Tsc22d2	-2.07961	5.91658	-3.12267	0.00290596	0.0418359	-1.9743
Gria1	-2.004	8.69734	-3.12039	0.00292501	0.0420744	-2.01009
Akna	-3.08791	1.35772	-3.11961	0.00293155	0.0421327	-1.69465
Rad23b	-0.811029	8.2114	-3.11875	0.00293871	0.0421926	-2.01194
Igbp1	1.33152	5.24302	3.11852	0.00294071	0.0421926	-1.949
Cyb5a	2.43911	6.08099	3.11727	0.00295123	0.0423076	-1.98828
Rfx5	-1.40577	3.39793	-3.116	0.00296196	0.0424255	-1.79805
Lsg1	1.2509	4.07541	3.11515	0.00296917	0.0424918	-1.85945
Tmem132b	-1.39196	6.61788	-3.11486	0.00297161	0.0424918	-2.00742
Nup88	0.79752	6.31592	3.11378	0.00298081	0.0425513	-2.00483
Mfsd6	-1.00736	6.4379	-3.11403	0.0029787	0.0425513	-2.00744
Aqp4	-3.8403	2.87687	-3.1125	0.00299175	0.0426716	-1.7602
Cbx1	1.27052	5.62448	3.11196	0.00299634	0.042701	-1.98698
Rev1	1.02135	4.37012	3.11039	0.00300976	0.0428562	-1.90099
Flnb	-1.61745	5.51343	-3.10899	0.00302182	0.0429726	-1.99472
Atp11a	-1.25927	6.17643	-3.10856	0.00302556	0.0429726	-2.0168
Pcm1	1.11423	7.34051	3.10879	0.00302357	0.0429726	-2.03058
Txnip	6.83639	4.14176	3.10821	0.00302859	0.0429747	-1.84776
Fut9	-2.41159	7.57473	-3.10796	0.00303079	0.0429747	-2.03604
Fam163b	-1.32587	6.61941	-3.10684	0.00304045	0.0430162	-2.02884
Masp1	-1.48146	3.82882	-3.10708	0.00303835	0.0430162	-1.86579
Caskin1	-1.45411	7.39909	-3.10674	0.00304134	0.0430162	-2.03752
Stip1	0.712815	7.46394	3.10592	0.00304841	0.0430442	-2.0394
Smyd3	-1.1706	5.0159	-3.10619	0.00304608	0.0430442	-1.9723
Zfp971	1.87248	2.92455	3.10541	0.00305287	0.0430711	-1.76785
Inpp5b	-1.41329	4.61932	-3.10389	0.00306613	0.0432222	-1.94841
Zfp791	2.27115	2.67672	3.10311	0.00307294	0.0432822	-1.7538
Sox2	-1.91217	3.84381	-3.10159	0.00308634	0.0434092	-1.88364
C2cd4b	-9.91358	-3.04121	-3.1015	0.00308709	0.0434092	-3.01738
Snrnp27	1.80867	5.19808	3.10074	0.0030938	0.0434474	-1.99079
Ano4	-1.76474	4.30667	-3.10061	0.00309495	0.0434474	-1.93069
Gm15663	-1.74928	2.5281	-3.10015	0.00309907	0.0434691	-1.76199
Tmem178	-1.30398	4.67101	-3.09967	0.00310326	0.0434896	-1.96252
Atp8a1	-1.26909	8.23807	-3.0994	0.00310567	0.0434896	-2.0625
Psmd6	1.36759	6.77377	3.09905	0.00310878	0.0434973	-2.04967
Mpdu1	0.949513	5.74737	3.09876	0.00311136	0.0434974	-2.02738
Prdm9	3.33236	0.640985	3.09843	0.00311425	0.0435017	-1.8639
Hdac2	1.59113	7.39863	3.09656	0.00313092	0.0436985	-2.06269
Lmtk2	-1.6194	7.2483	-3.09617	0.00313434	0.0437102	-2.06349
Elovl6	-1.73243	7.07453	-3.09525	0.0031426	0.0437893	-2.0641
4933431E20Rik	-1.70905	5.81028	-3.09409	0.00315303	0.0438985	-2.04387
Tcte1	-3.79719	-0.0307116	-3.09362	0.00315717	0.04392	-1.96397
St13	1.082	7.89362	3.09299	0.00316284	0.0439266	-2.07618
Cnppd1	0.939663	5.56725	3.09311	0.00316182	0.0439266	-2.03411
Rnf144a	1.29163	4.88393	3.09267	0.00316576	0.0439311	-1.98889
Mmadhc	0.892023	5.46816	3.09165	0.00317494	0.0440224	-2.03295
C1qbp	1.07903	5.80211	3.09132	0.00317795	0.044028	-2.04838
Mrc2	-2.71296	1.16632	-3.09098	0.00318106	0.044035	-1.77175
Rack1	1.17778	8.62933	3.08851	0.00320346	0.0443088	-2.09222
Uqcrh	1.64455	7.84256	3.08712	0.00321614	0.0444479	-2.09079
Ubash3b	-1.39804	6.08962	-3.08612	0.0032253	0.0445381	-2.0725
Mllt3	-1.37038	5.29937	-3.08554	0.00323062	0.0445751	-2.04359
Plek	-1.98467	2.36075	-3.08414	0.00324351	0.0447165	-1.79181
Tcap	-5.20226	1.55145	-3.08365	0.00324801	0.0447188	-1.77148
Tbc1d13	-1.06082	6.47129	-3.08355	0.00324896	0.0447188	-2.0866
Serinc1	-1.24308	9.97985	-3.08292	0.00325482	0.0447631	-2.10975
Fbxo7	-1.21686	6.03714	-3.07991	0.00328273	0.0451102	-2.08644
Cdkn2aipnl	1.55114	6.04146	3.07788	0.00330167	0.0453336	-2.08993
Bscl2	-1.27218	6.36266	-3.07675	0.00331236	0.0454435	-2.10285
Atrnl1	-1.60586	7.40228	-3.07489	0.00332981	0.0456459	-2.11993
Lrrc3	-1.16282	5.91194	-3.07285	0.00334916	0.0458741	-2.10132
Rhpn2	-1.98409	1.86064	-3.0721	0.00335635	0.0458982	-1.79995
Mamld1	-2.14904	5.08272	-3.07215	0.00335584	0.0458982	-2.06512
Rint1	-1.16751	4.75411	-3.0701	0.00337537	0.046121	-2.04538
Gpr26	-1.89179	8.18874	-3.0688	0.00338791	0.0462549	-2.14139
Gmcl1	1.09528	5.23998	3.06755	0.00339992	0.0463335	-2.08045
Sdc1	-2.66217	3.50841	-3.06747	0.0034007	0.0463335	-1.92746
Micos10	1.302	6.50157	3.06734	0.00340188	0.0463335	-2.12771
Cenpp	3.67713	0.651855	3.06541	0.00342053	0.0465126	-1.92938
Ruvbl1	1.05915	4.54036	3.06549	0.00341976	0.0465126	-2.03151
Krt33b	-10.4248	-3.52624	-3.06473	0.00342714	0.046565	-3.22402
Pus10	1.63981	3.5746	3.06336	0.00344043	0.0467082	-1.93534
Appl2	1.94913	4.10444	3.0623	0.00345085	0.0468121	-1.99099
Sash1	-1.72422	4.06294	-3.06061	0.00346736	0.0469983	-2.00834
Il1rap	-2.21019	3.71537	-3.05964	0.00347686	0.0470517	-1.97653
Alg10b	-1.33547	6.33022	-3.05977	0.00347558	0.0470517	-2.14504
Pcdhb16	-1.72634	3.73017	-3.05915	0.00348168	0.0470792	-1.97737
Rnf31	-1.36886	4.31271	-3.05791	0.00349401	0.0472082	-2.03899
Vim	1.75295	5.79726	3.05706	0.00350232	0.0472828	-2.13482
Naf1	-1.55902	3.80694	-3.05611	0.00351177	0.0473724	-1.99278
Skida1	-1.82815	2.88227	-3.05419	0.0035309	0.0475926	-1.90212
Kctd15	-1.29718	5.09961	-3.05369	0.0035359	0.0476221	-2.11279
Rnf181	1.03439	6.13159	3.05023	0.00357066	0.0480519	-2.1641
Itpk1	0.876128	6.33018	3.04884	0.00358473	0.048203	-2.17246
Elmod2	1.33828	5.56725	3.04811	0.00359212	0.048264	-2.14734
Ippk	1.34086	3.90709	3.04731	0.00360017	0.0483337	-2.01252
Fzd4	-2.28209	2.96187	-3.04671	0.00360633	0.0483592	-1.92781
5031425E22Rik	1.8794	3.28868	3.04657	0.00360778	0.0483592	-1.94608
Dock5	-3.61489	2.16551	-3.04502	0.00362351	0.0485315	-1.87731
Pcdhb21	-2.08435	2.625	-3.04471	0.00362673	0.0485362	-1.90537
Efr3a	-1.17503	5.90636	-3.04367	0.00363743	0.0485477	-2.17731
Caprin2	1.61211	3.57253	3.04351	0.00363907	0.0485477	-1.98445
Ddx10	1.2969	5.17967	3.04369	0.00363717	0.0485477	-2.13726
Gm13889	-2.45836	3.90923	-3.04376	0.00363651	0.0485477	-2.03801
Nr2e1	-2.60755	2.76978	-3.04219	0.00365262	0.0486656	-1.92525
Atxn7l1	-1.03305	4.85755	-3.04209	0.00365366	0.0486656	-2.12469
Commd10	1.29952	4.36134	3.04176	0.00365706	0.0486726	-2.07279
Ppm1h	-1.22297	7.51158	-3.041	0.00366486	0.0487305	-2.2078
Gm10335	-8.26186	0.422113	-3.04078	0.00366718	0.0487305	-1.94693
Tagln3	1.16361	7.00309	3.04008	0.00367444	0.0487887	-2.20417
Gan	-1.40936	5.97141	-3.03979	0.00367741	0.0487899	-2.18898
Hmg20b	2.2974	1.68074	3.03817	0.00369429	0.0489178	-1.87812
Atxn3	1.3723	5.0208	3.03829	0.00369301	0.0489178	-2.13863
Rskr	-7.12837	-2.76352	-3.03803	0.00369573	0.0489178	-3.01225
Sh3bgrl3	-1.22338	6.09214	-3.03559	0.00372118	0.0492162	-2.2007
Psmd12	0.957471	6.44822	3.03494	0.00372802	0.0492682	-2.20993
Eef1a1	0.827768	11.5812	3.03465	0.00373111	0.0492705	-2.23367
Prkag1	1.4359	3.87681	3.03312	0.00374719	0.0494442	-2.04456
Kcnb1	-1.43235	6.40742	-3.03169	0.00376236	0.0496056	-2.21897
Rhebl1	1.51117	3.78249	3.0311	0.00376853	0.0496483	-2.03925
Psmc1	0.956099	7.20233	3.02996	0.00378065	0.0497693	-2.23228
Tbc1d8	1.21257	4.33644	3.02915	0.00378933	0.0498448	-2.10164
Gm3551	-8.43726	-3.30357	-3.02825	0.00379892	0.049932	-3.21287
Cadm2	-2.2438	7.76214	-3.02724	0.00380972	0.0500351	-2.24525
Polr2b	1.04259	6.77222	3.02516	0.00383213	0.0502903	-2.23959
Nup188	-1.09537	5.10904	-3.02344	0.00385066	0.0504944	-2.19054
A830019P07Rik	-3.5263	0.377814	-3.02312	0.00385414	0.0505008	-2.01413
Rprd1b	-1.13237	4.86883	-3.02028	0.00388504	0.0506871	-2.18129
Pde4a	-1.21591	5.97427	-3.02043	0.00388332	0.0506871	-2.23839
Iqsec1	-1.36586	6.98739	-3.0209	0.0038782	0.0506871	-2.25405
Tlcd3b	-1.07953	6.73903	-3.02016	0.00388633	0.0506871	-2.25307
Grin2a	-2.02007	5.33413	-3.02109	0.00387617	0.0506871	-2.21159
Mtarc2	1.33267	5.03535	3.02144	0.00387233	0.0506871	-2.183
Otub2	-1.2264	4.74724	-3.01834	0.00390621	0.050868	-2.1774
Ddhd2	1.11568	5.43545	3.01852	0.00390429	0.050868	-2.21705
Sf3a3	0.998822	5.03549	3.01793	0.00391073	0.0508876	-2.19311
Chmp3	0.956868	6.41173	3.01529	0.00393983	0.0512076	-2.25949
Gypc	-7.81414	-1.63696	-3.01515	0.00394138	0.0512076	-2.60349
Syna	-2.58911	1.52286	-3.01454	0.00394816	0.0512564	-1.93146
Reps2	-1.43896	6.93505	-3.01119	0.00398545	0.0517009	-2.27826
Rab11b	-0.958165	6.82796	-3.01063	0.00399165	0.0517415	-2.27829
Ptpn23	-1.92221	6.32384	-3.00914	0.00400833	0.0518812	-2.27529
Pclaf	-9.62443	-2.05238	-3.00912	0.00400855	0.0518812	-2.75413
Rasa2	-1.13877	5.49728	-3.0087	0.00401331	0.051903	-2.24915
Mettl21a	1.95441	3.21035	3.00815	0.00401954	0.0519439	-2.03222
Gm16861	-4.05121	-0.0443424	-3.0071	0.00403132	0.0520563	-2.11973
Rad17	1.56816	3.98155	3.00571	0.00404711	0.0522203	-2.12329
Hs6st3	-2.95306	4.33193	-3.00493	0.00405599	0.052295	-2.1775
Fam118b	1.11844	4.23661	3.00413	0.00406508	0.0523724	-2.15627
Ralbp1	-1.14693	5.54597	-3.00231	0.00408586	0.05256	-2.26851
Npnt	-1.91073	4.66973	-3.00244	0.00408436	0.05256	-2.20729
Zfp324	-0.969468	4.64015	-3.00169	0.00409296	0.0526114	-2.20857
Pxmp4	1.24405	4.51072	3.00111	0.00409956	0.0526562	-2.19042
Ndufb5	1.46646	6.66553	3.00024	0.00410953	0.0527442	-2.3013
Ppm1g	0.748729	6.86048	2.99671	0.00415032	0.0531065	-2.31298
Pck2	-1.75693	3.77355	-2.9974	0.0041424	0.0531065	-2.13641
A230083G16Rik	-2.84648	0.49677	-2.99686	0.00414857	0.0531065	-2.04544
Gm1976	1.67222	4.20308	2.99709	0.00414592	0.0531065	-2.16755
Atp5g3	0.808041	8.15015	2.99535	0.00416617	0.0532679	-2.3281
Arl6	2.10911	5.06969	2.99509	0.00416923	0.0532679	-2.24882
Ap5b1	-2.64457	2.18339	-2.99409	0.00418089	0.0533766	-1.99639
Klhl42	-2.04348	5.38146	-2.99364	0.00418615	0.0534034	-2.28223
Kctd20	0.806457	6.9776	2.99205	0.00420478	0.0535396	-2.32622
Cmpk2	1.74579	4.02228	2.99183	0.00420742	0.0535396	-2.16117
Klhl2	0.953155	7.22501	2.99166	0.0042094	0.0535396	-2.32979
Ano3	3.22897	2.21623	2.99165	0.00420948	0.0535396	-1.99089
Gm14410	1.92498	2.73412	2.9907	0.00422068	0.0536416	-2.03088
Ankrd34b	-1.91064	3.92145	-2.99027	0.00422581	0.0536666	-2.16995
Psma7	1.24859	7.20361	2.98952	0.00423457	0.0537375	-2.33483
Niban2	0.914782	5.72235	2.98904	0.00424035	0.0537704	-2.30617
Btbd6	-1.28886	5.2269	-2.98748	0.00425885	0.0539242	-2.2889
Chrm3	-1.45301	4.48233	-2.98767	0.00425653	0.0539242	-2.23204
Abr	-0.957283	8.32715	-2.98548	0.00428271	0.0541626	-2.3545
Ndst3	-1.34447	4.23265	-2.98536	0.00428408	0.0541626	-2.21306
2310030G06Rik	9.86781	-2.1151	2.98455	0.00429382	0.0542452	-3.11863
Tmem39a	-1.55971	2.64658	-2.98401	0.00430023	0.0542856	-2.05292
Sh3bgr	-3.86362	0.510327	-2.98181	0.00432679	0.0545801	-2.07151
Zscan21	0.942161	5.46847	2.98071	0.00434006	0.0547068	-2.3149
Tnks	-1.35931	8.21839	-2.97933	0.00435676	0.0548764	-2.36959
Adcy5	-0.950187	7.37446	-2.97893	0.00436165	0.0548971	-2.36418
Fam222a	-2.49254	3.26545	-2.9781	0.00437168	0.0549008	-2.12725
Itga1	-4.01394	0.0538982	-2.97853	0.00436654	0.0549008	-2.15807
Scn1a	-1.70743	6.07939	-2.97817	0.0043709	0.0549008	-2.34846
Msh6	1.05457	4.68799	2.97723	0.00438236	0.0549743	-2.2662
Asap1	-1.02098	6.09555	-2.97661	0.00438992	0.0549743	-2.35238
Olig1	-2.90504	2.67529	-2.97656	0.00439053	0.0549743	-2.07567
Hdhd5	1.15088	4.05893	2.97669	0.004389	0.0549743	-2.20561
Pcsk9	-3.22989	0.858207	-2.97598	0.0043976	0.0550221	-2.04727
Ahcyl2	-1.1497	6.56099	-2.97545	0.00440412	0.0550629	-2.36288
Gorasp2	-1.00502	6.86824	-2.97437	0.00441742	0.0551476	-2.37051
Gm2011	1.93285	2.50355	2.97448	0.00441608	0.0551476	-2.05239
Ube2cbp	-2.24874	1.43147	-2.97343	0.00442903	0.0552518	-2.02543
Slc39a7	-2.06644	2.82682	-2.97298	0.00443459	0.0552804	-2.09737
Ascc1	1.01787	4.92107	2.97213	0.00444501	0.0553695	-2.29888
Arpc1a	0.808906	7.09616	2.97128	0.00445558	0.0554604	-2.37993
9530077C05Rik	-1.60634	3.1845	-2.97088	0.00446054	0.0554812	-2.1368
Batf3	-7.17993	-1.74986	-2.97032	0.00446756	0.0555278	-2.7035
Zfp207	1.08401	6.76623	2.97004	0.00447102	0.05553	-2.37897
Zfp120	2.00314	4.56522	2.96905	0.00448327	0.0556412	-2.27139
Map3k13	-1.71237	5.13665	-2.96753	0.00450232	0.055765	-2.33216
Dcbld2	-1.53388	5.94072	-2.96746	0.00450314	0.055765	-2.37137
Frg2f1	1.53915	3.61616	2.96787	0.00449808	0.055765	-2.17641
Dnase1	-2.12712	2.79573	-2.96708	0.0045079	0.0557832	-2.10801
Cd47	-1.58039	8.2616	-2.9662	0.00451896	0.0558792	-2.4029
Csnk1d	-0.964237	6.99065	-2.96521	0.0045314	0.0559104	-2.3948
Garem1	-2.38102	5.41467	-2.96529	0.00453052	0.0559104	-2.35685
Prmt1	0.999795	7.40863	2.96569	0.00452537	0.0559104	-2.39698
Bnip2	1.17089	4.89713	2.96482	0.00453641	0.0559314	-2.31542
Ociad1	-0.823762	7.97461	-2.9639	0.00454805	0.0560342	-2.40668
Xylt2	-1.64656	5.45829	-2.96344	0.00455377	0.0560638	-2.36158
Igf2	-6.68883	-0.749887	-2.96152	0.0045782	0.0563235	-2.38319
Ube3a	-1.70839	7.38831	-2.96109	0.00458367	0.0563499	-2.40948
Ppp4c	1.03996	5.48489	2.96039	0.00459252	0.0563766	-2.3668
Rpl35a	1.58128	6.68516	2.96052	0.00459097	0.0563766	-2.40162
Rad1	1.56271	3.38105	2.95857	0.0046159	0.0565815	-2.173
Tdrd7	0.899803	4.84865	2.95877	0.00461333	0.0565815	-2.32713
1500015A07Rik	2.62807	1.13894	2.95795	0.00462379	0.0566373	-2.08125
Tenm3	-1.89496	7.42129	-2.95626	0.00464561	0.0568633	-2.42196
Pex7	1.48853	4.34108	2.95456	0.00466754	0.0570427	-2.28845
Gpr132	-6.55458	-1.47695	-2.95434	0.00467038	0.0570427	-2.63986
BC002059	2.40588	2.83086	2.95453	0.00466794	0.0570427	-2.12349
Trabd	1.10859	5.06483	2.95349	0.00468136	0.0571355	-2.35703
Dyrk2	-1.3431	4.952	-2.95294	0.00468855	0.0571821	-2.35647
Adck1	0.979458	5.38835	2.95162	0.0047057	0.0573086	-2.38309
Mta3	-1.16956	5.62355	-2.95185	0.0047027	0.0573086	-2.39896
Helz	-1.56771	5.51616	-2.95105	0.00471316	0.0573582	-2.39602
Pomp	1.22031	6.65036	2.95072	0.00471747	0.0573693	-2.4259
Slc38a1	-1.60952	8.08724	-2.94874	0.00474353	0.0576034	-2.44576
Pds5a	1.00874	5.80649	2.94893	0.00474098	0.0576034	-2.4102
Serpinb6a	1.50661	4.34123	2.94756	0.00475899	0.0577497	-2.30553
Col1a1	-4.32754	1.6325	-2.94673	0.00476997	0.0578031	-2.08643
Pdzd8	-1.32917	6.26091	-2.94671	0.00477023	0.0578031	-2.43104
Rab6b	-2.34901	10.1142	-2.94591	0.00478084	0.0578902	-2.45837
Mir6236	4.89153	4.281	2.94467	0.0047972	0.0580468	-2.28768
Lzts2	-1.84004	4.64179	-2.94286	0.00482137	0.0582975	-2.359
Gm5124	-2.13392	3.62571	-2.94219	0.00483035	0.0583645	-2.2513
Rtca	0.971392	4.95536	2.94065	0.00485096	0.0585298	-2.38115
Hmgn1	-1.03424	5.51585	-2.94084	0.00484839	0.0585298	-2.42072
Trpv6	-3.16471	2.25016	-2.94011	0.00485821	0.0585338	-2.12812
Sirpa	-1.43479	6.83051	-2.9403	0.0048557	0.0585338	-2.45444
Gm13689	-8.42982	-2.93392	-2.93955	0.00486581	0.0585419	-3.16338
2700099C18Rik	-2.35659	1.66139	-2.93978	0.00486261	0.0585419	-2.10185
Amer1	-1.19581	5.4124	-2.93905	0.00487245	0.0585802	-2.4202
Notch3	-2.31019	2.48195	-2.93866	0.0048777	0.0586017	-2.14541
St6galnac4	-1.06555	4.87805	-2.93764	0.00489146	0.0587252	-2.38842
Ctbp1	-1.04895	7.69026	-2.93633	0.00490932	0.058898	-2.47365
Acadsb	-2.0124	6.09647	-2.93549	0.00492063	0.0589918	-2.45197
Ace	-1.80952	5.20539	-2.93451	0.00493403	0.0591105	-2.4201
Slx4	-1.0643	5.69219	-2.93289	0.00495615	0.0593335	-2.44805
Slc25a40	1.98301	3.64234	2.93243	0.00496242	0.0593665	-2.26328
Ctnnb1	0.924212	9.26604	2.93184	0.00497058	0.0594221	-2.49264
Slc9a3r2	-1.15295	5.03803	-2.93148	0.00497553	0.0594393	-2.41624
Abca13	-5.45702	-1.56977	-2.9294	0.00500413	0.0596188	-2.73008
Rps27a	1.69489	7.85023	2.92982	0.00499839	0.0596188	-2.49029
Slc25a48	13.2129	-4.12199	2.92937	0.00500466	0.0596188	-3.76625
Kcnh7	-2.18814	6.42181	-2.93011	0.00499433	0.0596188	-2.4756
Lpin1	1.33926	4.43081	2.92826	0.00501995	0.0597207	-2.36322
Dlec1	3.40999	-0.00737854	2.92824	0.00502027	0.0597207	-2.34056
Dennd5b	-1.79717	6.55146	-2.92436	0.00507424	0.0603204	-2.49167
Lpgat1	-2.31238	7.14423	-2.92367	0.00508401	0.0603941	-2.50056
Sec23b	-1.57779	5.65714	-2.92103	0.00512107	0.060749	-2.47731
Cog8	-0.991928	4.73274	-2.92112	0.00511989	0.060749	-2.4176
Chst2	-1.3016	6.96809	-2.92012	0.00513395	0.0608426	-2.50741
Gm24644	-10.5581	-4.38293	-2.91997	0.00513616	0.0608426	-3.59914
Rps3a1	1.77708	8.08552	2.91966	0.0051405	0.0608514	-2.51731
Psmb1	1.44392	7.51057	2.91817	0.00516167	0.0610593	-2.51655
Clec2l	-1.45188	6.34343	-2.91657	0.00518444	0.0612858	-2.50609
Haus4	-2.63617	1.28706	-2.91445	0.00521475	0.0615581	-2.15904
Tsfm	1.08858	4.00025	2.9145	0.00521403	0.0615581	-2.35283
Etfb	1.8708	1.7173	2.91408	0.00522016	0.061579	-2.15788
Htra2	-1.32261	4.71683	-2.9138	0.0052241	0.0615825	-2.43551
Slc5a5	-2.6244	1.60709	-2.91121	0.00526159	0.0619476	-2.16494
Sema6d	-1.66325	5.62168	-2.91094	0.00526536	0.0619476	-2.50037
Mib2	-1.57355	7.09742	-2.9109	0.00526606	0.0619476	-2.53185
Rnf19a	1.29034	5.40782	2.91014	0.00527705	0.0620337	-2.48654
Ranbp6	-1.50626	6.31318	-2.90976	0.00528257	0.0620555	-2.52354
Pdgfb	-1.41906	4.21049	-2.90818	0.00530562	0.0621106	-2.40075
Comtd1	-2.06405	1.64135	-2.90852	0.00530057	0.0621106	-2.17168
Amigo3	-2.08815	1.82748	-2.90879	0.00529673	0.0621106	-2.17663
Nyap1	-1.24619	7.65505	-2.90904	0.00529305	0.0621106	-2.54145
Trim32	-0.601265	7.9334	-2.90835	0.00530311	0.0621106	-2.54509
Gas8	1.1821	4.54323	2.90754	0.00531488	0.062176	-2.42526
Dnaaf9	0.819669	7.26646	2.90614	0.00533546	0.0623737	-2.54433
Plrg1	1.14754	6.00548	2.90542	0.00534601	0.0623907	-2.52482
Atmin	-1.0722	5.49917	-2.90553	0.00534441	0.0623907	-2.50796
1700034H15Rik	-3.43183	0.738724	-2.90503	0.00535167	0.0623907	-2.20658
Pign	-1.85704	4.32811	-2.90528	0.00534806	0.0623907	-2.41995
Slc44a1	-1.45594	4.11063	-2.90467	0.00535706	0.0624105	-2.39941
Dbndd2	1.50696	4.0375	2.9038	0.00536978	0.0625156	-2.38036
St3gal6	-3.62445	1.80246	-2.90347	0.00537471	0.06253	-2.1896
Fn3k	1.71273	3.1611	2.90277	0.00538511	0.0626079	-2.28227
Srm	-1.07462	6.28178	-2.90239	0.00539065	0.0626293	-2.54
Enpp5	-0.870776	7.91366	-2.90135	0.00540611	0.0626798	-2.56234
Plpp5	-1.56867	5.00707	-2.90142	0.00540507	0.0626798	-2.48833
Galnt7	1.22803	3.12334	2.90139	0.00540552	0.0626798	-2.28129
Sdc3	-1.51365	9.34999	-2.90046	0.00541935	0.0627472	-2.57089
Zbtb16	-2.20776	4.55363	-2.90047	0.00541921	0.0627472	-2.45428
Akt2	0.874483	5.85573	2.89945	0.00543441	0.0628615	-2.53484
Paip1	1.29388	6.36176	2.8988	0.00544408	0.0628615	-2.55024
Abcd3	1.00899	6.53071	2.89911	0.00543938	0.0628615	-2.55246
Slitrk2	-1.39781	5.0964	-2.89901	0.00544089	0.0628615	-2.50127
Gtf2a2	1.63909	5.06408	2.89827	0.005452	0.06291	-2.49116
Actr10	1.04321	7.34469	2.89755	0.00546281	0.0629315	-2.56627
Ap4b1	2.42444	1.21299	2.8969	0.00547247	0.0629315	-2.2061
Tle6	3.72221	0.776648	2.89763	0.00546164	0.0629315	-2.25209
Rapgef2	-0.991801	6.85896	-2.8971	0.0054696	0.0629315	-2.56304
Pcdha7	-1.69582	3.34762	-2.89737	0.00546548	0.0629315	-2.33247
Rtcb	0.925447	7.17682	2.89612	0.00548432	0.0630166	-2.56817
Elfn1	-2.13853	5.11178	-2.89592	0.00548731	0.0630166	-2.51064
Dnajc8	0.88752	6.23223	2.89513	0.00549922	0.063097	-2.55699
4833420G17Rik	0.827215	4.69374	2.89496	0.00550178	0.063097	-2.47166
Epha5	-1.09731	8.34618	-2.89429	0.00551188	0.0631105	-2.58262
Trhde	-1.44061	3.8651	-2.89414	0.00551415	0.0631105	-2.39816
Itpripl2	-3.38324	0.556798	-2.89422	0.00551292	0.0631105	-2.25295
Gna13	1.37235	5.16134	2.89096	0.00556239	0.0634738	-2.51554
Smarcc2	-0.729358	8.10629	-2.89081	0.00556465	0.0634738	-2.58971
Rdh10	1.32745	3.22643	2.89121	0.00555857	0.0634738	-2.31912
Trappc4	1.11237	6.46978	2.89116	0.00555933	0.0634738	-2.57096
Arhgap10	1.97451	3.04147	2.89157	0.00555319	0.0634738	-2.29451
Gpn3	1.22748	4.04097	2.89033	0.00557206	0.0635155	-2.41532
Maob	-3.20462	0.65653	-2.88973	0.0055812	0.0635768	-2.24664
B3gntl1	-1.18869	3.12864	-2.88947	0.00558525	0.0635802	-2.32472
Gnai3	0.971577	6.82823	2.88837	0.00560201	0.0637281	-2.58303
Tgfb3	-1.7912	2.72627	-2.88734	0.0056179	0.0638658	-2.28849
Rsl1d1	1.24637	6.60138	2.88694	0.00562395	0.0638917	-2.58355
Gpatch11	1.49586	5.41112	2.886	0.00563858	0.0639292	-2.54566
Mtap	1.31515	3.54885	2.88622	0.00563507	0.0639292	-2.36652
Zfp541	8.62257	-1.98144	2.88612	0.00563663	0.0639292	-3.1743
Ppif	0.942439	5.20244	2.88543	0.00564727	0.0639847	-2.53525
Limch1	1.2282	7.07567	2.88361	0.00567554	0.064262	-2.59776
Trmt1l	-1.12164	4.38974	-2.88334	0.00567972	0.0642663	-2.47587
Rlim	-1.35996	6.48103	-2.88219	0.00569759	0.0644255	-2.59454
Gap43	0.767417	10.0725	2.88106	0.0057152	0.0645814	-2.61952
Tax1bp3	1.62164	2.77718	2.88027	0.00572761	0.0646785	-2.29674
Fth1	0.982813	8.99478	2.87893	0.00574871	0.064863	-2.62306
Nap1l1	1.42482	7.65371	2.87874	0.00575162	0.064863	-2.61531
Pbk	-6.13558	-1.45713	-2.87839	0.00575716	0.0648822	-2.74917
Phldb1	-1.3789	6.0956	-2.87805	0.00576243	0.0648983	-2.59743
Sesn1	-1.16306	4.85389	-2.87772	0.00576777	0.0649152	-2.53442
Nt5c	1.22462	4.82723	2.87719	0.00577612	0.0649499	-2.52473
Fgf14	-1.40505	4.83886	-2.87703	0.00577852	0.0649499	-2.53436
Mapk9	-0.962011	7.69765	-2.87616	0.0057923	0.0650183	-2.62294
Ggn	-4.60912	-0.0326181	-2.87637	0.00578908	0.0650183	-2.36786
Mmp24	0.995162	8.14326	2.87568	0.0057999	0.0650604	-2.62671
Exph5	-7.12961	-1.78572	-2.87516	0.00580816	0.0651099	-2.85644
Neurog2	5.2302	-0.738367	2.87364	0.00583238	0.0653381	-2.6914
Ubac1	0.82385	6.65581	2.87318	0.00583966	0.0653764	-2.61849
Emc2	1.77631	6.47222	2.8728	0.00584571	0.0654009	-2.61582
Ppfibp1	-1.35455	5.11118	-2.87254	0.0058499	0.0654044	-2.56662
Minar1	-2.54272	5.72761	-2.87226	0.00585432	0.0654106	-2.60091
Rell2	-1.61328	5.4101	-2.87178	0.00586209	0.0654542	-2.58757
Fyco1	1.27708	4.5069	2.87084	0.00587717	0.0655792	-2.51091
Sf3b3	1.14164	6.60988	2.8697	0.00589545	0.0656711	-2.62607
Myo5a	-1.85299	9.26252	-2.8696	0.00589705	0.0656711	-2.64696
Rubcn	-1.13743	7.14496	-2.86999	0.00589075	0.0656711	-2.63306
Mgat2	-1.13426	5.63042	-2.86842	0.00591615	0.0658406	-2.60527
Tyw3	1.67478	3.14335	2.86817	0.00592019	0.0658421	-2.36211
Paqr3	-1.31483	4.01014	-2.86776	0.0059267	0.0658713	-2.47759
Gart	0.900361	4.93304	2.86667	0.00594433	0.0660239	-2.56055
Lgi1	-1.49106	6.02754	-2.86616	0.0059527	0.0660734	-2.62383
Erg	11.1034	-4.12881	2.86389	0.00598968	0.0664402	-3.79586
Pou2f2	1.81619	2.54076	2.86183	0.00602334	0.0667261	-2.31737
Cetn3	2.25017	6.05794	2.8619	0.00602223	0.0667261	-2.63192
Klhl25	1.75646	4.51127	2.8615	0.00602883	0.0667433	-2.53038
Sstr4	-2.52965	1.42338	-2.86113	0.00603491	0.0667669	-2.27372
Cep72	2.27579	2.09976	2.86063	0.00604307	0.0668046	-2.28951
Lrp10	-1.10228	5.27693	-2.86029	0.00604865	0.0668046	-2.60708
Tbc1d8b	-2.50521	3.02281	-2.8602	0.00605017	0.0668046	-2.3841
0610012G03Rik	1.12632	5.39513	2.85686	0.0061054	0.0673705	-2.61711
Washc4	1.22433	5.67773	2.85571	0.00612463	0.0675387	-2.63445
Elmo2	0.80499	6.50495	2.85468	0.00614185	0.0676844	-2.66147
Psmc5	0.930382	6.60861	2.85388	0.00615513	0.0677866	-2.66474
Slc37a3	-0.716106	6.31768	-2.85341	0.00616308	0.06783	-2.66222
Gm12522	4.95083	-0.536226	2.85218	0.00618362	0.0679978	-2.6482
Tmem74bos	-5.32682	-1.57612	-2.85202	0.00618637	0.0679978	-2.83417
Ulk1	-1.44883	6.36991	-2.85092	0.00620496	0.0680908	-2.66968
Ets1	-3.5251	0.628992	-2.85069	0.00620886	0.0680908	-2.33477
Ipo8	1.01546	5.23991	2.85054	0.00621139	0.0680908	-2.62101
Camk2d	-1.24993	7.03114	-2.85032	0.00621496	0.0680908	-2.68011
Cd200r2	-10.9922	-3.9633	-2.85087	0.00620579	0.0680908	-3.53702
Npr2	-1.32734	4.13391	-2.84958	0.00622749	0.0680959	-2.53526
Slco1c1	-2.95998	2.71362	-2.84978	0.00622423	0.0680959	-2.37627
Cmas	0.936549	6.92727	2.84974	0.0062249	0.0680959	-2.67929
Ccny	-0.932868	6.71495	-2.8489	0.00623902	0.0681338	-2.67953
Tarsl2	0.871599	5.66745	2.84905	0.00623654	0.0681338	-2.65073
St6gal2	-1.46614	6.79119	-2.84862	0.00624389	0.068143	-2.68142
Spred3	-2.62896	5.6139	-2.84833	0.00624867	0.0681512	-2.65448
Tsku	-1.77099	2.50174	-2.84747	0.0062633	0.0682668	-2.3609
Tmc4	-2.33931	1.83335	-2.84557	0.00629573	0.0685319	-2.31949
Cbx8	-1.22415	4.1044	-2.84566	0.00629431	0.0685319	-2.54147
Slc7a5	-1.23932	7.50674	-2.84446	0.00631475	0.0686948	-2.69908
Ptrh2	1.41099	4.40513	2.8439	0.00632434	0.0687548	-2.56541
Psma2	1.20693	6.92982	2.84343	0.0063325	0.0687552	-2.69454
Lhx6	-1.61638	6.57927	-2.84358	0.00632992	0.0687552	-2.69121
Mrpl27	1.15738	5.11745	2.84298	0.00634022	0.0687748	-2.63217
Lsm1	1.22666	5.25721	2.84264	0.00634609	0.0687748	-2.64269
C1s2	-8.08569	-3.17084	-2.84261	0.0063465	0.0687748	-3.33969
Tshz2	-3.07954	1.32408	-2.84219	0.00635383	0.0688102	-2.31474
Gtf2h3	1.05148	4.29995	2.83994	0.00639278	0.0691808	-2.56584
Ccnb1	-6.09857	-1.32027	-2.83974	0.00639624	0.0691808	-2.76525
Nid2	-3.54986	0.633609	-2.83687	0.00644612	0.0696758	-2.35381
Klhl14	-2.02571	3.41699	-2.83631	0.00645606	0.0697386	-2.48634
Dus4l	-1.61269	2.92218	-2.83531	0.00647357	0.0698543	-2.43024
Aimp1	1.25204	5.93127	2.83499	0.00647915	0.0698543	-2.69496
Eno3	1.70025	2.55797	2.83522	0.00647507	0.0698543	-2.38134
Chic1	-1.63014	3.81655	-2.83437	0.00648994	0.069926	-2.53755
Garin1a	-4.67618	-0.758226	-2.83387	0.00649889	0.0699779	-2.61498
Adam15	-1.45415	6.01118	-2.83282	0.00651724	0.0701286	-2.70598
Flot2	1.01346	6.97907	2.8326	0.00652118	0.0701286	-2.72157
Nsmaf	0.945877	4.69798	2.83195	0.00653268	0.0701631	-2.62477
Clstn2	-1.85385	7.03367	-2.83216	0.00652907	0.0701631	-2.72471
Grhl1	2.79074	1.10484	2.83113	0.00654722	0.0702597	-2.35217
Rgs3	-1.51389	4.02931	-2.83057	0.00655712	0.0702597	-2.57033
Cend1	-1.09024	8.09056	-2.83094	0.00655068	0.0702597	-2.73647
Rab26os	3.02289	2.07236	2.83051	0.00655829	0.0702597	-2.35276
Lnx2	-1.68567	2.713	-2.83022	0.00656347	0.0702707	-2.42117
Tram1	-1.28137	5.33	-2.82984	0.00657023	0.0702985	-2.68455
Erh	1.22636	5.03603	2.8286	0.00659218	0.0704888	-2.66026
Gemin8	2.10883	1.78618	2.82732	0.00661516	0.0706899	-2.35039
Uhrf1bp1l	-1.51914	6.05212	-2.8268	0.00662441	0.0707441	-2.72124
Ccdc47	0.973964	6.66372	2.82625	0.00663428	0.0708047	-2.73295
Zscan12	1.32417	3.02199	2.82583	0.00664179	0.0708401	-2.45058
Usp40	-1.25523	3.57506	-2.82499	0.00665689	0.0708672	-2.52983
Mob4	1.64416	6.80703	2.82509	0.00665518	0.0708672	-2.73726
C130060C02Rik	10.5378	-2.36869	2.82537	0.00665016	0.0708672	-3.39021
Psma4	1.54317	7.00496	2.82436	0.00666836	0.0709374	-2.74165
4930598N05Rik	-6.10419	-1.34257	-2.82416	0.00667187	0.0709374	-2.78422
Acot11	-1.56007	1.95614	-2.82284	0.00669585	0.0711476	-2.37471
Mrps15	1.10398	4.95645	2.8217	0.00671641	0.0712765	-2.6715
Stk32b	-1.32344	4.7834	-2.82181	0.00671434	0.0712765	-2.65948
Ano10	-1.85854	4.9377	-2.82061	0.0067362	0.0714417	-2.68085
Slco4a1	-3.82691	0.280975	-2.81968	0.00675319	0.0715771	-2.43123
Bcam	-2.44939	2.45991	-2.81846	0.00677552	0.071679	-2.42465
Nectin2	-1.27115	5.4214	-2.81862	0.0067725	0.071679	-2.71677
Bhlhb9	1.44237	7.38938	2.81852	0.00677437	0.071679	-2.75995
Dnajc5	-1.00782	9.2085	-2.81735	0.00679591	0.0718498	-2.7742
Atn1	-1.77116	3.00237	-2.81638	0.00681366	0.0719924	-2.48487
Pcdh11x	-2.32601	7.12585	-2.81545	0.00683075	0.072128	-2.76623
Mmp16	-1.59648	6.37332	-2.81362	0.00686457	0.0724398	-2.76078
Srp14	1.32895	6.71838	2.81272	0.00688126	0.0725707	-2.76633
Acsf3	1.1029	4.15782	2.81232	0.00688871	0.072604	-2.61535
Zbed4	1.83618	3.1332	2.81189	0.00689663	0.0726422	-2.49078
Galns	-1.49206	3.5132	-2.8104	0.00692445	0.0727992	-2.55749
Ddx27	0.919867	5.02448	2.81079	0.00691714	0.0727992	-2.70364
Mchr1	-1.42766	2.78503	-2.8104	0.00692444	0.0727992	-2.47372
Usp11	-0.900708	7.61206	-2.80955	0.00694046	0.0728741	-2.78469
Nek9	1.33422	5.64786	2.80904	0.00694995	0.0728741	-2.7456
Plcg2	-3.77667	-0.453681	-2.8092	0.00694692	0.0728741	-2.58993
Phc1	-1.31839	5.91623	-2.80916	0.00694771	0.0728741	-2.75993
Rasal2	-1.26859	6.13318	-2.80887	0.00695311	0.0728741	-2.76661
Abhd5	-1.10478	4.82844	-2.80834	0.00696301	0.0729327	-2.69543
Agbl3	2.2148	3.49047	2.80697	0.00698883	0.0731579	-2.544
Zfp282	-0.865496	5.78332	-2.80666	0.00699474	0.0731744	-2.76051
Ginm1	1.43742	3.81207	2.80637	0.00700011	0.0731854	-2.5871
Sipa1l3	-1.39457	5.30556	-2.80596	0.0070079	0.0732216	-2.74012
Lage3	1.58393	4.11467	2.80453	0.00703491	0.073413	-2.62704
Kcnab3	1.86878	3.01967	2.80464	0.00703276	0.073413	-2.49348
Tmem255a	-3.85029	4.51528	-2.80419	0.00704139	0.0734353	-2.69074
Mtrf1	1.69327	3.12655	2.80336	0.00705707	0.0735536	-2.5124
Riok3	0.800087	6.53006	2.80208	0.00708154	0.0737177	-2.78958
Arrdc1	-1.24315	4.16931	-2.80214	0.00708028	0.0737177	-2.65237
Snhg12	-1.66944	4.42727	-2.80175	0.00708775	0.073737	-2.68231
Rapgef4	-1.44022	6.79641	-2.79986	0.00712399	0.0740685	-2.79982
Shc3	-2.08501	5.48292	-2.79849	0.00715026	0.074296	-2.76979
Necap2	-1.48541	4.34495	-2.79718	0.00717537	0.0744654	-2.68411
Rwdd2b	1.13469	3.6835	2.79732	0.00717281	0.0744654	-2.59597
Cnga2	-7.07668	-2.35566	-2.79632	0.00719204	0.0745926	-3.14233
Smim15	1.52429	5.59753	2.79597	0.00719884	0.0746174	-2.77462
Clstn3	-0.958694	8.93853	-2.79417	0.0072338	0.0748589	-2.82958
Grm2	-2.40839	5.41985	-2.79359	0.00724498	0.0748589	-2.77819
Rnft2	-0.79647	7.12661	-2.7934	0.00724869	0.0748589	-2.81889
Cyp4x1	-1.23694	5.32737	-2.7934	0.00724865	0.0748589	-2.77179
Rps8	0.941006	7.99394	2.79395	0.00723795	0.0748589	-2.82466
Gm15501	0.941006	7.99394	2.79395	0.00723795	0.0748589	-2.82466
Eml4	-1.05162	5.55248	-2.79304	0.00725575	0.0748861	-2.78248
Nfyc	-1.44703	4.23397	-2.79206	0.00727493	0.0749925	-2.68357
Os9	-1.16345	7.4972	-2.7921	0.00727411	0.0749925	-2.82586
Nfyb	1.26818	4.83162	2.79043	0.00730686	0.0752299	-2.73487
Acd	-1.12235	4.96587	-2.79048	0.00730587	0.0752299	-2.75374
Slc1a4	-1.18591	7.52592	-2.79002	0.00731495	0.0752674	-2.83112
Cutc	2.4971	1.41934	2.78936	0.0073279	0.0753548	-2.42804
Fam241b	-1.26314	5.36251	-2.7882	0.00735071	0.0753766	-2.78159
Khdrbs3	0.975262	7.03759	2.78812	0.0073523	0.0753766	-2.82982
Tacc2	0.749725	6.65955	2.78831	0.00734852	0.0753766	-2.82468
Slc7a3	-2.5798	5.96006	-2.78839	0.00734697	0.0753766	-2.81217
Pin4	2.11665	2.4417	2.78852	0.00734431	0.0753766	-2.47562
Mafk	1.28373	3.07779	2.78692	0.00737604	0.0755743	-2.5475
Ttc1	1.11751	5.48476	2.78617	0.00739084	0.0756801	-2.79325
Dedd	1.46823	2.25512	2.78525	0.00740919	0.0758221	-2.4705
Ostf1	1.44634	2.59392	2.78475	0.00741914	0.0758402	-2.50023
Kctd4	3.51574	2.61608	2.78471	0.00741993	0.0758402	-2.49018
Tmem201	-0.992483	5.86265	-2.78369	0.00744022	0.0759558	-2.8195
Dpy19l2	6.96939	-1.44266	2.78381	0.00743778	0.0759558	-3.06074
Rfc5	1.38315	3.69822	2.7832	0.00744993	0.0760091	-2.62937
Ctdspl2	1.47417	4.9874	2.78261	0.00746168	0.0760831	-2.76569
Ttc39b	-1.83095	5.32563	-2.78201	0.00747369	0.0761596	-2.80034
Kcmf1	-1.17836	6.28833	-2.78177	0.0074786	0.0761637	-2.83522
Ppp1r1c	-4.81361	1.83383	-2.78146	0.0074847	0.0761801	-2.46207
Fbxo28	-1.24609	5.95328	-2.77947	0.00752476	0.0765417	-2.83228
Galnt16	0.713909	5.95958	2.77891	0.00753606	0.0765941	-2.8317
Meis3	0.972573	5.36558	2.77877	0.00753897	0.0765941	-2.80407
Slc6a17	-1.81542	9.29125	-2.77758	0.00756294	0.0767596	-2.87044
Mas1	2.73284	1.61685	2.77752	0.00756433	0.0767596	-2.45352
Snrpd3	0.978442	5.98506	2.77489	0.00761774	0.0771166	-2.84204
Pgd	0.808265	5.88621	2.77519	0.00761165	0.0771166	-2.83848
Lama1	-2.30403	2.36072	-2.77546	0.00760615	0.0771166	-2.514
Cops4	0.854294	6.05568	2.77489	0.00761775	0.0771166	-2.84458
Fam50a	1.01538	5.06223	2.77322	0.00765186	0.0773231	-2.79585
Slc35f4	-1.26848	4.07554	-2.77329	0.00765032	0.0773231	-2.71114
Magoh	1.6484	5.0896	2.77347	0.00764671	0.0773231	-2.79528
Snx25	-1.00186	6.29832	-2.77259	0.00766463	0.0774059	-2.85712
Rps19	1.53688	7.47246	2.77185	0.00767987	0.0775135	-2.87311
Nfkbil1	-1.99282	2.69491	-2.77143	0.0076885	0.0775544	-2.55637
Rpa1	1.37034	5.21959	2.76966	0.00772497	0.0778294	-2.81402
Pepd	0.965459	4.97123	2.76988	0.00772042	0.0778294	-2.79658
Phlda1	-2.2225	3.30353	-2.76886	0.00774147	0.0778756	-2.63252
Mgat1	-0.992335	5.87866	-2.76864	0.00774612	0.0778756	-2.85631
Hspa9	1.08834	8.38155	2.76811	0.00775718	0.0778756	-2.88925
Ehd1	-0.884193	6.56036	-2.76855	0.00774801	0.0778756	-2.87129
Pip5k1c	-1.05353	8.29608	-2.7683	0.00775326	0.0778756	-2.88864
Igsf10	-2.23719	3.30905	-2.7682	0.00775533	0.0778756	-2.63452
Bbs12	2.44066	2.03403	2.76784	0.00776275	0.0778854	-2.49108
Aff1	-2.65993	3.28877	-2.76732	0.00777342	0.0778999	-2.63614
Gzmm	-2.29689	0.71929	-2.76739	0.00777206	0.0778999	-2.49043
Zfp68	1.21228	5.91277	2.76705	0.00777915	0.0779113	-2.85821
Aurka	2.46106	1.17985	2.76662	0.00778809	0.0779547	-2.48011
Cldn15	-6.05725	-1.76339	-2.766	0.00780088	0.0780364	-3.01122
Gxylt1	1.17696	3.78328	2.76541	0.00781336	0.0781151	-2.68195
Slitrk5	-0.920431	6.40866	-2.765	0.00782193	0.0781547	-2.87697
Slc22a12	5.90076	-0.954694	2.76449	0.00783249	0.0781678	-2.93141
Parp10	-2.42193	1.6127	-2.76449	0.00783242	0.0781678	-2.4879
Impa1	1.11065	5.4835	2.76406	0.00784154	0.0782005	-2.84566
Gabbr2	-1.04976	7.68382	-2.76389	0.00784501	0.0782005	-2.89496
Srsf12	-1.1598	5.2918	-2.76362	0.00785075	0.0782116	-2.8405
Calcrl	-4.269	3.41745	-2.76327	0.00785816	0.0782393	-2.66519
Ucp1	10.7502	-2.67023	2.76105	0.00790473	0.0786275	-3.54354
Fzd2	4.71234	-0.254689	2.76097	0.00790644	0.0786275	-2.71221
Tbc1d9b	0.809826	6.76288	2.75978	0.00793163	0.0788316	-2.89429
Camkk2	1.44912	6.49839	2.75908	0.00794648	0.0789329	-2.89176
Rin1	2.01545	2.63465	2.75766	0.00797665	0.079186	-2.56244
Akr1b3	0.896368	5.63364	2.75716	0.00798728	0.0791986	-2.87056
Cxxc5	-1.45449	3.39367	-2.75724	0.00798555	0.0791986	-2.66699
Cdc25b	1.45698	3.5737	2.75375	0.0080603	0.0798758	-2.6822
9330104G04Rik	1.57836	2.67749	2.75269	0.00808299	0.0800538	-2.58061
Ptprj	-1.25607	5.90117	-2.75233	0.0080908	0.0800842	-2.89563
Rhoj	-4.8438	-0.852474	-2.75211	0.00809558	0.0800847	-2.78465
Cers6	-1.13884	7.08108	-2.75106	0.00811808	0.0801913	-2.91986
Sfrp2	-2.61996	2.46926	-2.75089	0.00812195	0.0801913	-2.57858
Bex3	-1.00583	7.87825	-2.75073	0.00812531	0.0801913	-2.92795
Pierce2	2.02178	2.58717	2.75075	0.0081249	0.0801913	-2.57439
Polr1f	1.72485	3.98468	2.75018	0.00813723	0.080262	-2.73948
Ift74	2.11262	4.30478	2.74853	0.00817308	0.0805687	-2.77611
Slc25a19	-0.957089	5.49792	-2.7464	0.00821946	0.0809316	-2.89313
Bmt2	-1.77321	6.0517	-2.74657	0.0082159	0.0809316	-2.91449
Gng4	-2.02089	8.23163	-2.74612	0.00822572	0.0809461	-2.94149
Olfml2b	-2.47607	2.95318	-2.7454	0.00824135	0.0810527	-2.64565
Sigmar1	0.88887	4.91975	2.74435	0.00826451	0.0811275	-2.85311
Tubb4b	0.921966	7.66137	2.74466	0.00825762	0.0811275	-2.93994
Arid4a	1.08457	4.87369	2.74418	0.00826813	0.0811275	-2.84869
Kcns2	-1.5836	4.7856	-2.74449	0.00826148	0.0811275	-2.85037
Rrp36	1.27612	4.52502	2.74387	0.00827501	0.0811461	-2.81645
Fitm2	0.80975	5.26043	2.74366	0.00827963	0.0811461	-2.8812
Loxhd1	-9.3187	-3.54117	-2.74343	0.00828469	0.0811488	-3.53194
Jdp2	-1.45642	3.72913	-2.74065	0.00834607	0.0817026	-2.7465
Gid8	0.798196	5.65865	2.73983	0.00836427	0.0817471	-2.91273
Chmp2a	1.00308	5.99738	2.73964	0.00836865	0.0817471	-2.92667
Bloc1s5	1.13516	4.08757	2.73958	0.00836994	0.0817471	-2.77881
Syt9	-0.918648	5.28513	-2.73994	0.00836201	0.0817471	-2.89613
Slc35b4	-0.916161	5.19258	-2.7384	0.00839619	0.0818616	-2.89347
Ablim2	-0.956886	5.56587	-2.73876	0.00838825	0.0818616	-2.91398
Cdh15	3.55586	0.970136	2.73844	0.00839525	0.0818616	-2.54962
Nsg2	0.634389	10.305	2.73735	0.00841973	0.0819407	-2.96727
Hs1bp3	1.35799	3.58621	2.73762	0.00841372	0.0819407	-2.72122
Dnajc15	1.28072	4.07656	2.73717	0.00842367	0.0819407	-2.78185
1700120C14Rik	3.94774	-0.568222	2.7375	0.00841636	0.0819407	-2.81351
Nhp2	1.3278	5.18956	2.73672	0.00843366	0.0819907	-2.89058
Dlx6os1	-1.74378	6.7232	-2.73569	0.00845674	0.0821679	-2.95238
Castor2	-0.974661	7.23732	-2.7341	0.00849258	0.0824345	-2.96183
Ywhae	0.805264	9.97585	2.73404	0.00849393	0.0824345	-2.97502
Shank3	-1.19519	7.37916	-2.73359	0.0085042	0.082483	-2.96448
Ndufaf3	-1.00111	4.84101	-2.73339	0.00850868	0.082483	-2.87926
Pcna	1.28038	5.59574	2.73284	0.008521	0.0825551	-2.92444
Mmd	-1.30211	6.57923	-2.73155	0.00855033	0.0825887	-2.95948
Grip2	-1.13006	5.26314	-2.7322	0.00853563	0.0825887	-2.91292
Spag4	-2.19024	3.30892	-2.73103	0.00856198	0.0825887	-2.72156
St8sia4	-2.53995	6.7857	-2.73175	0.00854565	0.0825887	-2.96308
Adra1a	-3.03974	3.52403	-2.73137	0.00855436	0.0825887	-2.7488
Hes5	-3.87406	0.070956	-2.73187	0.00854297	0.0825887	-2.6259
Arf2	0.852752	7.28351	2.73097	0.00856352	0.0825887	-2.96886
Zfp932	2.12224	4.31192	2.73234	0.00853229	0.0825887	-2.81603
4933405L10Rik	6.8178	-1.63968	2.72992	0.00858734	0.0826603	-3.18036
Jpt1	0.85114	8.1369	2.72968	0.00859287	0.0826603	-2.97921
Bin3	1.02927	3.91819	2.72942	0.00859865	0.0826603	-2.78379
Dcps	1.09526	3.84364	2.72935	0.00860027	0.0826603	-2.77327
Poln	-5.06356	-1.32407	-2.72939	0.00859938	0.0826603	-2.93044
Marchf2	1.15438	5.41451	2.72994	0.00858687	0.0826603	-2.92246
Tars2	0.82214	4.95699	2.72873	0.00861454	0.0827464	-2.89355
Zfp746	-0.960175	4.91768	-2.72853	0.008619	0.0827464	-2.89668
Gm17484	-2.36554	1.48911	-2.7283	0.00862425	0.0827498	-2.56086
Gm2237	-1.66658	1.79009	-2.72735	0.00864596	0.082911	-2.57502
Dhcr24	0.823528	7.34311	2.72621	0.00867218	0.0831154	-2.98077
Adcy9	-1.65346	4.45243	-2.72525	0.00869421	0.0831609	-2.86475
Tusc2	0.797309	6.00171	2.7252	0.00869552	0.0831609	-2.95951
Tmem163	-2.33755	4.34952	-2.72509	0.00869783	0.0831609	-2.85713
Soat1	2.04891	4.73217	2.72494	0.00870151	0.0831609	-2.87331
Reln	-2.19989	9.83545	-2.72574	0.00868292	0.0831609	-2.99456
Hapln4	-2.28327	0.851507	-2.72422	0.00871812	0.0832256	-2.57082
Tead1	-1.37697	3.64538	-2.7243	0.0087161	0.0832256	-2.77171
Zfp846	-1.00688	4.99436	-2.7237	0.00872999	0.0832919	-2.91419
Fbln1	1.37087	3.36024	2.72331	0.00873893	0.083302	-2.72699
Zmiz1	-1.72563	7.10413	-2.72312	0.00874341	0.083302	-2.98646
Irf1	4.93644	-0.131383	2.72302	0.00874583	0.083302	-2.75206
Acat3	-6.27641	-2.17937	-2.72196	0.00877022	0.0834874	-3.1888
Sec62	-1.36672	6.79727	-2.72175	0.00877522	0.083488	-2.98526
Afg3l2	0.691409	6.3527	2.72138	0.00878374	0.0835221	-2.97906
Prpf38a	1.30066	5.8833	2.72106	0.00879122	0.0835462	-2.96579
Phyhd1	2.69499	0.590324	2.72019	0.00881145	0.0836914	-2.6138
Selenop	-3.41875	2.05062	-2.71984	0.00881969	0.0837227	-2.60808
Utp23	-1.40503	3.16246	-2.71911	0.00883677	0.0837908	-2.72708
Gpc2	1.83216	2.40281	2.71926	0.00883325	0.0837908	-2.6281
Pdlim3	-3.11226	2.42672	-2.71875	0.00884525	0.0838242	-2.64862
Ighg2c	-10.8357	-4.08716	-2.71783	0.00886678	0.0839812	-3.6711
Efhc1	4.1185	-0.731483	2.7173	0.00887922	0.084052	-2.89764
Mtx2	1.58832	6.41571	2.71681	0.00889059	0.0841126	-2.9901
Tbl2	1.97688	5.47586	2.71573	0.00891615	0.0842454	-2.9547
E4f1	-1.1327	4.96117	-2.71558	0.00891958	0.0842454	-2.9313
Atxn1l	-1.22247	5.62028	-2.71599	0.00891	0.0842454	-2.97003
Tppp3	2.5525	5.04438	2.71497	0.00893399	0.0842531	-2.92455
Tvp23a	-1.51387	5.14502	-2.71491	0.00893533	0.0842531	-2.9452
Mrps9	1.01634	4.64286	2.71521	0.00892844	0.0842531	-2.89637
Mrpl24	0.934683	4.41488	2.71401	0.00895666	0.0844072	-2.87649
Ola1	1.43203	6.40456	2.71356	0.00896736	0.084414	-2.9978
Abcb9	-1.15904	5.26713	-2.71363	0.00896565	0.084414	-2.95716
Stk3	1.48519	4.31278	2.71313	0.0089776	0.0844335	-2.86296
Hao1	-11.2098	-3.44138	-2.71264	0.00898927	0.0844335	-3.51275
Mcf2l	0.756542	7.95254	2.71274	0.00898676	0.0844335	-3.01789
Adam17	2.05574	3.62018	2.71263	0.00898941	0.0844335	-2.77827
Prxl2a	-0.903349	6.50608	-2.71221	0.00899948	0.0844662	-3.00436
Atxn1	-1.08348	6.24937	-2.71206	0.00900287	0.0844662	-2.99992
Kif5a	-0.897412	9.81865	-2.71141	0.00901849	0.0845658	-3.02843
Aass	10.1124	-2.53626	2.71069	0.00903566	0.0846089	-3.53788
Ccdc40	2.43254	1.48036	2.7109	0.00903053	0.0846089	-2.59229
Cmtr2	1.55098	3.30205	2.7105	0.00904001	0.0846089	-2.7467
1700101I11Rik	3.25341	1.28741	2.71038	0.00904309	0.0846089	-2.59347
Zmpste24	-1.21856	4.17024	-2.71017	0.00904812	0.0846091	-2.86751
Atp7b	3.24832	2.61574	2.70984	0.00905589	0.0846351	-2.65391
Irak2	-1.91309	1.71494	-2.70959	0.0090618	0.0846435	-2.60938
Spp1	-6.288	-0.514473	-2.70917	0.00907198	0.0846919	-2.75602
Arnt2	-1.05036	8.85318	-2.70857	0.00908634	0.0847323	-3.03327
Slc4a8	-1.1336	6.9539	-2.70874	0.00908227	0.0847323	-3.01864
Ggta1	2.57467	1.55908	2.70834	0.00909188	0.0847373	-2.59876
Snhg15	-2.0166	3.36781	-2.70696	0.00912497	0.0849989	-2.78385
Itm2c	1.34196	7.40216	2.70543	0.00916189	0.0852959	-3.03007
Cnnm2	-1.66361	4.77044	-2.70464	0.0091809	0.0854258	-2.94262
Gnpda1	1.12193	4.00133	2.70376	0.00920228	0.0855777	-2.85214
Dleu2	-1.67053	2.09528	-2.7034	0.00921117	0.0856132	-2.64955
Cdk5r2	-1.01983	6.96325	-2.70303	0.0092201	0.0856492	-3.03204
Dynll2	-1.39509	8.65352	-2.70227	0.00923865	0.0857745	-3.04724
Plxdc2	-1.39568	5.1322	-2.70197	0.00924582	0.0857939	-2.97621
Nubp1	1.21759	3.75872	2.70123	0.00926392	0.085821	-2.82783
Sgip1	-1.39054	7.53303	-2.70123	0.00926396	0.085821	-3.04236
Fam181a	-2.60711	2.54097	-2.70147	0.00925808	0.085821	-2.69781
Crhbp	-2.46816	4.05793	-2.7002	0.00928904	0.0858284	-2.88425
Dpysl2	-1.03528	8.83833	-2.7009	0.00927197	0.0858284	-3.05121
Urb2	-1.40891	4.32905	-2.70046	0.00928279	0.0858284	-2.90777
A830018L16Rik	-1.05951	7.33656	-2.70016	0.00929013	0.0858284	-3.04288
Sox1	-1.71931	4.66954	-2.70056	0.0092803	0.0858284	-2.94189
Vegfb	-1.21358	5.34266	-2.69958	0.00930428	0.0858654	-2.99451
Cct2	0.799851	7.83803	2.69971	0.00930116	0.0858654	-3.04767
Mtus2	-0.942899	5.65032	-2.69852	0.0093304	0.0860126	-3.01299
Fcrlb	10.1741	-2.86826	2.69871	0.00932574	0.0860126	-3.62068
Rev3l	-1.2212	7.49367	-2.69826	0.00933661	0.086023	-3.04887
Atad1	1.34172	7.97834	2.6967	0.009375	0.0863296	-3.05561
Elp2	0.707061	7.20947	2.69557	0.00940305	0.0864616	-3.05156
Slc37a4	1.08318	5.58001	2.69567	0.00940061	0.0864616	-3.0119
Mcph1	-1.12975	3.96627	-2.6955	0.00940466	0.0864616	-2.87911
1600012H06Rik	1.45956	4.75606	2.69367	0.00945012	0.0868323	-2.95477
Eif3e	1.71403	7.42567	2.6932	0.00946195	0.0868938	-3.05887
Arpp19	-1.04583	7.02344	-2.69277	0.0094726	0.0869444	-3.05662
Ccser1	-1.13855	3.89732	-2.68936	0.00955782	0.0876551	-2.88369
Fzd10	-10.1697	-3.85089	-2.68905	0.00956558	0.0876551	-3.64153
A930033H14Rik	-2.43787	1.17714	-2.68925	0.00956056	0.0876551	-2.63613
Rsad1	1.12557	4.88072	2.68822	0.00958661	0.0878003	-2.98059
Hdc	-11.637	-3.92386	-2.68766	0.00960074	0.0878066	-3.65112
Coq3	1.47725	4.87063	2.68782	0.00959669	0.0878066	-2.97844
Qars	0.723345	6.18811	2.68757	0.00960289	0.0878066	-3.05478
Ankdd1b	1.51343	2.48593	2.68737	0.00960806	0.0878066	-2.70713
Rps14	1.73087	8.11552	2.68703	0.00961651	0.0878322	-3.07913
Mettl5	1.68888	2.98528	2.68685	0.00962125	0.0878322	-2.76235
Grpel2	0.87874	5.42926	2.6847	0.00967552	0.0880583	-3.02975
Mcm8	1.73121	3.69994	2.68533	0.00965973	0.0880583	-2.8539
Chrnb2	-1.01356	6.43275	-2.68541	0.00965751	0.0880583	-3.06546
Atp11b	-1.12311	7.53566	-2.68464	0.00967725	0.0880583	-3.08111
Pacsin1	-0.821206	7.11992	-2.68512	0.00966494	0.0880583	-3.0758
Tnfaip8l3	-2.37948	2.67645	-2.68502	0.00966755	0.0880583	-2.74734
Btbd3	-1.31488	6.5391	-2.68395	0.00969474	0.08817	-3.07044
Kifc3	-1.07105	5.45049	-2.68323	0.00971299	0.0882886	-3.0392
Rcvrn	-6.15137	-1.51628	-2.68185	0.00974815	0.0885606	-3.03673
Wwox	-1.51595	3.96872	-2.68083	0.00977446	0.0887519	-2.91347
Porcn	-1.06752	5.36705	-2.67923	0.00981545	0.0890763	-3.04222
Uxs1	1.25009	4.78802	2.67878	0.00982722	0.0891077	-2.99299
Gm2093	10.3925	-3.77382	2.67869	0.00982945	0.0891077	-3.83924
Ak6	1.12903	4.29251	2.67784	0.00985132	0.0892581	-2.94571
Npc1l1	-4.31409	-0.139563	-2.67734	0.00986422	0.0893271	-2.75154
Grem2	-1.49927	5.18091	-2.67698	0.00987347	0.0893631	-3.0353
Vti1b	1.01458	6.86438	2.67672	0.00988021	0.0893763	-3.09147
Atad5	1.61904	3.13677	2.67591	0.00990122	0.0893908	-2.80467
Pip5k1b	-2.16049	1.50576	-2.67637	0.00988941	0.0893908	-2.67052
Kcne1	-8.89635	-3.81043	-2.67592	0.00990097	0.0893908	-3.64972
Gm7599	-8.1461	-2.99505	-2.67585	0.00990295	0.0893908	-3.44766
Pop1	1.01455	3.9802	2.67546	0.00991303	0.089434	-2.91524
Mrs2	-1.13977	3.91796	-2.67438	0.0099412	0.0895926	-2.91986
Atp5h	1.03805	7.26468	2.67444	0.00993961	0.0895926	-3.1014
Rps13	0.902894	6.6235	2.67405	0.00994961	0.0896207	-3.09439
Utp15	1.02293	4.68308	2.67364	0.00996047	0.0896386	-2.99637
Car15	-3.26384	-0.321275	-2.67343	0.00996581	0.0896386	-2.79529
Teddm3	-9.93357	-3.33593	-2.67337	0.00996749	0.0896386	-3.52443
Aven	1.71646	2.27184	2.67309	0.00997478	0.0896565	-2.71696
Dgat1	-1.23461	4.62171	-2.67245	0.00999135	0.0897577	-3.00276
Gm10925	-6.26165	0.755941	-2.67194	0.0100049	0.0898321	-2.6739
Syn3	-1.74502	5.28134	-2.67144	0.010018	0.0899013	-3.05442
Ildr2	-1.48126	5.86787	-2.67081	0.0100344	0.0900015	-3.08647
Alms1	-1.4598	3.48205	-2.67034	0.0100469	0.0900649	-2.87762
Col20a1	-3.04319	1.13753	-2.66931	0.0100741	0.0902486	-2.67649
Cask	-1.40964	7.61964	-2.66914	0.0100783	0.0902486	-3.11801
Zfp608	-1.1912	5.48597	-2.66895	0.0100833	0.0902486	-3.07413
Camta2	1.07754	6.70221	2.66874	0.0100889	0.0902506	-3.1078
Slc30a4	-1.29115	6.36557	-2.66782	0.0101134	0.090422	-3.10404
Ntng1	-2.91876	3.63144	-2.66761	0.0101189	0.0904233	-2.90692
Blzf1	1.11687	4.76898	2.66667	0.0101439	0.0904754	-3.01996
2210016L21Rik	-0.796602	6.08762	-2.66658	0.0101461	0.0904754	-3.10209
Tob2	-1.68691	4.0316	-2.66718	0.0101302	0.0904754	-2.95233
Bend4	-1.12428	5.15773	-2.66696	0.0101361	0.0904754	-3.05828
Slc6a4	-5.18312	-1.8125	-2.66553	0.0101742	0.0906299	-3.15788
Glis1	-5.18726	-1.25281	-2.66532	0.0101795	0.0906299	-3.00137
Rpl30	1.6382	7.11291	2.66558	0.0101728	0.0906299	-3.12005
Utp14a	1.09786	4.03467	2.66508	0.0101861	0.0906411	-2.946
Mief1	-0.884809	5.68319	-2.66363	0.0102247	0.0908407	-3.09374
Nfia	-1.66585	4.03258	-2.66381	0.01022	0.0908407	-2.95746
Atxn2l	-0.993041	7.45361	-2.66369	0.010223	0.0908407	-3.12916
Stx8	1.12677	4.37057	2.6621	0.0102656	0.0911545	-2.99071
Cenpk	3.16047	1.11928	2.66191	0.0102708	0.0911545	-2.69348
Mlst8	0.852591	4.92939	2.66161	0.0102788	0.0911775	-3.04676
Snx8	0.991977	5.94597	2.66119	0.0102901	0.0911827	-3.10836
Mettl4	1.3677	3.66245	2.66129	0.0102874	0.0911827	-2.90565
Cers2	-1.24896	4.61956	-2.66044	0.0103104	0.091198	-3.02909
Rer1	0.892102	6.42302	2.66059	0.0103063	0.091198	-3.12239
Actl6b	0.803992	6.85386	2.66032	0.0103134	0.091198	-3.12954
Pik3cb	-1.21494	4.67653	-2.66047	0.0103095	0.091198	-3.03474
Adipor2	0.749405	6.72197	2.66008	0.0103201	0.0912092	-3.12839
Sp2	-1.93221	3.22268	-2.65808	0.0103741	0.0916059	-2.87383
Armc3	4.06516	-0.699639	2.65801	0.0103758	0.0916059	-2.98204
Xrcc6	1.05504	4.07132	2.6566	0.0104142	0.0918973	-2.96909
Plekhg4	-2.07721	2.68656	-2.6564	0.0104197	0.0918974	-2.81177
Retreg3	0.708288	6.48029	2.65512	0.0104545	0.0921569	-3.13624
Npdc1	-1.03235	7.82546	-2.6548	0.0104632	0.0921853	-3.15298
P4ha2	2.63611	4.47615	2.65365	0.0104946	0.0923173	-3.00945
Thumpd3	1.26954	5.15824	2.65381	0.0104903	0.0923173	-3.08212
Itpa	1.2148	6.2798	2.65372	0.0104926	0.0923173	-3.13448
Lrp3	-1.18534	6.37219	-2.65343	0.0105006	0.092322	-3.13937
Casp7	-1.61943	3.35805	-2.65319	0.0105071	0.0923319	-2.89899
Kcnj4	-1.34257	6.77044	-2.65129	0.0105593	0.0927422	-3.15058
Apeh	-0.952974	5.17428	-2.65038	0.0105846	0.0929157	-3.09766
Asrgl1	1.24274	5.13501	2.65017	0.0105902	0.0929171	-3.08687
Gm16973	-1.75011	1.80943	-2.64948	0.0106094	0.093037	-2.74346
Etaa1	1.56416	3.36211	2.64805	0.010649	0.0932592	-2.89554
Chd1	0.814019	5.66437	2.64814	0.0106463	0.0932592	-3.12748
Dpp7	-1.58814	3.47006	-2.64797	0.0106513	0.0932592	-2.92797
Tmem167	-1.29486	6.41922	-2.64752	0.0106637	0.0932712	-3.15302
Banf1	0.897943	6.39595	2.64769	0.010659	0.0932712	-3.15165
Hdac1	0.931297	4.55161	2.6463	0.0106975	0.0935191	-3.04624
Usp48	-0.98872	6.63249	-2.6434	0.0107785	0.0941783	-3.1667
Rps4x	1.47339	8.31348	2.64273	0.0107974	0.0942464	-3.1836
Rps6-ps1	11.1524	-3.25919	2.64288	0.0107933	0.0942464	-3.75801
Tmem64	0.931275	4.27806	2.64202	0.0108174	0.094338	-3.02556
2410006H16Rik	-1.89255	6.0211	-2.64196	0.0108191	0.094338	-3.15879
Thop1	1.02403	5.89377	2.64149	0.0108324	0.0943565	-3.15223
Fam122b	-1.84742	1.52994	-2.64168	0.010827	0.0943565	-2.74253
Ltbp2	-6.24595	-1.49743	-2.64013	0.0108706	0.0945923	-3.09031
Phlpp2	-1.33407	5.98416	-2.64021	0.0108685	0.0945923	-3.16092
Cd320	1.45825	3.49237	2.63894	0.0109043	0.0947962	-2.93377
Nit2	1.82643	4.23162	2.63891	0.0109053	0.0947962	-3.02271
Unkl	-1.53679	3.8161	-2.63785	0.0109354	0.0949664	-2.99375
Trmt11	1.70921	2.99363	2.63782	0.0109361	0.0949664	-2.87219
Gm45650	13.5295	-4.06443	2.63725	0.0109524	0.0950592	-3.92701
Mtcl1	-1.18668	5.06357	-2.63665	0.0109695	0.0951587	-3.12238
Appbp2	-1.14731	7.14343	-2.63614	0.010984	0.0952356	-3.18986
Mtmr6	-1.38718	7.03164	-2.63542	0.0110045	0.0953647	-3.19043
Psmd9	0.827365	5.2825	2.63488	0.0110199	0.095421	-3.13605
Plekhm3	-1.37501	5.01383	-2.6348	0.0110223	0.095421	-3.12119
Nedd9	-1.60394	4.08442	-2.63375	0.0110525	0.0955945	-3.03555
Cbr4	1.65032	4.05086	2.63371	0.0110536	0.0955945	-3.01312
Taf11	0.985975	4.60164	2.63283	0.0110789	0.0957638	-3.0821
Mrpl16	0.872839	4.8971	2.6325	0.0110883	0.0957963	-3.11142
Sdhd	1.08722	7.54002	2.63164	0.0111132	0.0959135	-3.20324
Upf2	1.02543	4.56619	2.63166	0.0111126	0.0959135	-3.08129
Gabrb2	-1.45281	7.20003	-2.63009	0.0111578	0.0962401	-3.20456
Gk5	1.33988	3.27607	2.62979	0.0111665	0.0962401	-2.92414
Rpl5	1.70384	7.48481	2.62974	0.0111681	0.0962401	-3.20679
Adipor1	0.6171	6.7956	2.6295	0.0111749	0.0962495	-3.20007
A730008H23Rik	-0.927121	6.42046	-2.62885	0.0111939	0.0963151	-3.19666
Hjurp	-0.927121	6.42046	-2.62885	0.0111939	0.0963151	-3.19666
Mettl6	1.28249	4.48729	2.62743	0.0112351	0.0966203	-3.08177
Esf1	1.31897	5.3101	2.62723	0.011241	0.0966225	-3.15396
Cracr2b	2.47357	1.2482	2.62663	0.0112585	0.0967234	-2.76192
Hsp90aa1	1.18435	10.6401	2.62577	0.0112835	0.0968889	-3.22805
Usf3	-1.36817	5.55052	-2.62493	0.0113081	0.0970512	-3.17777
Bcan	-2.86661	3.92394	-2.62452	0.0113202	0.0971061	-3.03827
Gm5436	3.65043	-0.346	2.62406	0.0113336	0.0971711	-2.93847
Ppwd1	1.55888	2.89731	2.62213	0.0113903	0.0976082	-2.89602
Zfp3	1.16602	3.26636	2.62186	0.0113984	0.0976278	-2.94428
Chodl	-2.60683	3.48125	-2.62046	0.0114398	0.0978442	-2.99413
Dnajc14	0.724956	5.55211	2.62032	0.0114441	0.0978442	-3.18591
Lmo3	-1.16089	7.09334	-2.62022	0.0114468	0.0978442	-3.2259
Colgalt2	1.88608	4.22082	2.62024	0.0114464	0.0978442	-3.06207
Tusc1	-1.93957	2.28527	-2.61945	0.0114698	0.0979917	-2.84984
Gga3	-0.942847	5.88331	-2.6187	0.011492	0.0980093	-3.20567
Ddx4	-1.78963	1.3862	-2.61906	0.0114815	0.0980093	-2.78354
Slc12a6	-0.995722	5.7097	-2.6184	0.0115009	0.0980093	-3.20036
Cnksr1	-4.78375	-1.00879	-2.61842	0.0115004	0.0980093	-3.01548
H4c8	-6.32473	-0.223493	-2.61876	0.0114902	0.0980093	-2.85462
Med8	0.843483	4.86195	2.61781	0.0115184	0.0980108	-3.1418
L1cam	-1.02901	9.4423	-2.61783	0.0115181	0.0980108	-3.24571
R3hdm1	-1.38842	7.42041	-2.61793	0.011515	0.0980108	-3.23467
Cacna1b	-1.03159	7.618	-2.61594	0.0115745	0.09829	-3.24088
Sh3bp5	-0.703725	6.26682	-2.6165	0.0115575	0.09829	-3.22213
Gtf2e2	1.89601	4.86298	2.61606	0.0115707	0.09829	-3.13974
Usp27x	-0.823164	4.37583	-2.61621	0.0115663	0.09829	-3.10476
Alkbh7	-1.4202	3.61959	-2.61455	0.0116161	0.0985937	-3.0208
Eif3k	0.986204	6.57098	2.61264	0.0116736	0.0990327	-3.23533
Casd1	-0.983845	6.04753	-2.61241	0.0116804	0.0990401	-3.22614
Syn2	-1.30247	7.79344	-2.61193	0.011695	0.099066	-3.25155
Kdm1b	0.914325	4.98531	2.61192	0.0116951	0.099066	-3.16418
Pfkfb4	1.5706	4.45331	2.61106	0.0117212	0.0991875	-3.11296
L3mbtl3	-1.69575	5.89302	-2.61106	0.0117211	0.0991875	-3.22482
[truncated: 14,917 more rows]

## Sheet: Upregulated_GO_noChd8
	query	significant	p_value	term_size	query_size	intersection_size	precision	recall	term_id	source	term_name	effective_domain_size	source_order	parents	evidence_codes	intersection	highlighted	nlog10_pval
1	query_1	TRUE	6.76388e-05	567	487	55	0.112936	0.0970018	GO:0006412	GO:BP	translation	11991	2162	c(\GO:0009059\", \"GO:0010467\", \"GO:0019538\")"	IDA IEA,IEA,IBA IEA,IBA IEA,NAS IEA,ISS NAS,ISS IBA IEA,IBA IEA,ISS IBA NAS IEA,IBA,IEA,IBA IEA,IBA NAS IEA,NAS,ISS NAS IEA,IDA IBA IEA,IBA IEA,IBA IEA,ISS NAS IEA,IBA IEA,ISS IBA NAS IEA,IDA IMP IBA NAS IEA,IBA NAS IC IEA,NAS IEA,NAS IEA,NAS IEA,ISS IEA,ISO,ISS IBA IEA,ISS IEA,IMP IBA IEA,ISS IEA,ISS IEA,IBA IEA,IEA,ISS ISO IBA IEA,IEA,IDA IBA IEA,NAS IEA,NAS IEA,IEA,NAS IC,ISS ISO IEA,IBA IEA,N…	Ddx25,Mknk2,Eef1g,Eif5a2,Rpl14,Mrpl45,Eif2b3,Cnot9,Rpl6,Drg2,Cnot8,Lars2,Rpl3,Mrpl40,Mrps16,Eif3f,Hars2,Drg1,Rps6,Eif4e3,Ptcd3,Rpl22,Rpl9,Mrpl49,Rps20,Rps11,LTO1,Cdk4,Eif5a,Pus7,Eif3m,Nat10,Mtres1,Denr,Mrps35,Eif4e2,Dhx29,Eif3b,Mrpl9,Rpl4,Eif1ad,Rpl7,Ybx1,Eef1b2,Rpl27,Rpl28,Mrpl44,Rps10,Gtdc1,Mrps23,Ncbp2,Gemin5,Rack1,Caprin2,Eef1a1	TRUE	9.60133
2	query_1	TRUE	0.0033635	155	487	23	0.0472279	0.148387	GO:0002181	GO:BP	cytoplasmic translation	11991	727	GO:0006412	NAS,IBA IEA,ISS IBA NAS IEA,IBA,NAS,IEA,IBA IEA,ISS NAS IEA,IBA IEA,IBA NAS IEA,NAS,NAS,IBA IEA,IBA IEA,IEA,IEA,NAS,NAS,ISO IEA,NAS,NAS,NAS,NAS	Rpl14,Eif2b3,Rpl6,Drg2,Rpl3,Eif3f,Drg1,Rps6,Rpl22,Rpl9,Rps20,Rps11,Eif3m,Denr,Dhx29,Eif3b,Rpl4,Rpl7,Ybx1,Rpl27,Rpl28,Rps10,Ncbp2	FALSE	5.69477
3	query_1	TRUE	1.01203e-05	22	492	11	0.0223577	0.5	GO:0005838	GO:CC	proteasome regulatory particle	12150	374	c(\GO:0022624\", \"GO:0032991\")"	IBA,IBA,IBA,IBA IEA,IDA IBA IEA,IBA,IDA IBA IEA,IDA IBA,IBA,IDA IBA,IDA IBA IEA	Psmc3,Psmd4,Psmc4,Psmc6,Psmd2,Psmc2,Psmd11,Psmd13,Psmd6,Psmd12,Psmc1	TRUE	11.501
4	query_1	TRUE	3.52336e-05	84	492	19	0.0386179	0.22619	GO:1905369	GO:CC	endopeptidase complex	12150	3689	GO:1905368	IDA ISS IBA IEA,IDA IBA IEA,IDA IBA IEA,ISS IBA IEA,ISO IEA,IDA,IDA ISO IBA IEA,IDA ISS IBA IEA,IDA ISO IBA IEA,IDA IBA IEA,IDA IBA IEA,IDA IBA IEA,IDA IBA IEA,IGI IBA IEA,IDA ISS IBA IEA,IDA ISS IBA IEA,IDA IBA IEA,IDA IBA IEA,IDA IBA IEA	Psmb2,Psmc3,Psmd4,Sec11a,Pidd1,Prickle1,Psmc4,Psma1,Psmc6,Psmd2,Psmc2,Psmd11,Psmd13,Immp2l,Psma6,Psmb7,Psmd6,Psmd12,Psmc1	FALSE	10.2535
5	query_1	TRUE	4.49882e-05	59	492	16	0.0325203	0.271186	GO:0000502	GO:CC	proteasome complex	12150	81	c(\GO:0140535\", \"GO:1905369\")"	IDA ISS IBA IEA,IDA IBA IEA,IDA IBA IEA,IDA,IDA ISO IBA IEA,IDA ISS IBA IEA,IDA ISO IBA IEA,IDA IBA IEA,IDA IBA IEA,IDA IBA IEA,IDA IBA IEA,IDA ISS IBA IEA,IDA ISS IBA IEA,IDA IBA IEA,IDA IBA IEA,IDA IBA IEA	Psmb2,Psmc3,Psmd4,Prickle1,Psmc4,Psma1,Psmc6,Psmd2,Psmc2,Psmd11,Psmd13,Psma6,Psmb7,Psmd6,Psmd12,Psmc1	FALSE	10.0091
6	query_1	TRUE	9.56289e-05	26	492	11	0.0223577	0.423077	GO:0022624	GO:CC	proteasome accessory complex	12150	831	c(\GO:0000502\", \"GO:0005622\", \"GO:0032991\")"	IDA IBA,IDA IBA,IDA IBA,IDA IBA IEA,IDA IBA IEA,IDA IBA,IDA IBA IEA,IDA IBA,IDA IBA,IDA IBA,IDA IBA IEA	Psmc3,Psmd4,Psmc4,Psmc6,Psmd2,Psmc2,Psmd11,Psmd13,Psmd6,Psmd12,Psmc1	FALSE	9.25504
7	query_1	TRUE	0.000710666	110	492	20	0.0406504	0.181818	GO:1905368	GO:CC	peptidase complex	12150	3688	GO:1902494	IDA ISS IBA IEA,IDA IBA IEA,IDA IBA IEA,IBA NAS IEA,ISS IBA IEA,ISO IEA,IDA,IDA ISO IBA IEA,IDA ISS IBA IEA,IDA ISO IBA IEA,IDA IBA IEA,IDA IBA IEA,IDA IBA IEA,IDA IBA IEA,IGI IBA IEA,IDA ISS IBA IEA,IDA ISS IBA IEA,IDA IBA IEA,IDA IBA IEA,IDA IBA IEA	Psmb2,Psmc3,Psmd4,Sgf29,Sec11a,Pidd1,Prickle1,Psmc4,Psma1,Psmc6,Psmd2,Psmc2,Psmd11,Psmd13,Immp2l,Psma6,Psmb7,Psmd6,Psmd12,Psmc1	FALSE	7.24931
8	query_1	TRUE	0.00568043	12	492	7	0.0142276	0.583333	GO:0008540	GO:CC	proteasome regulatory particle, base subcomplex	12150	494	c(\GO:0005838\", \"GO:0032991\")"	IBA,IBA,IBA,IBA IEA,IBA IEA,IBA,IBA IEA	Psmc3,Psmd4,Psmc4,Psmc6,Psmd2,Psmc2,Psmc1	FALSE	5.17073
9	query_1	TRUE	0.014511	181	492	24	0.0487805	0.132597	GO:0044391	GO:CC	ribosomal subunit	12150	2038	c(\GO:0005840\", \"GO:1990904\")"	IBA,IDA IPI ISO IBA IEA,ISS NAS,IDA IPI ISS ISO IBA IEA,IDA IPI ISO IBA IEA,ISS NAS IEA,ISS IBA NAS IEA,IDA ISO NAS IEA,NAS,IDA ISO IEA,IDA IPI ISO IBA IEA,ISS IBA NAS IEA,IDA ISO IBA NAS IEA,IDA ISO IBA NAS IEA,IEA,ISS NAS IEA,IDA IPI ISO IBA IEA,IDA IPI ISO IBA IEA,IDA IPI ISS ISO IBA IEA,IDA IPI ISO IBA IEA,ISS IBA NAS IEA,IDA ISO IBA NAS IEA,ISS NAS,IDA ISO	Rpl7l1,Rpl14,Mrpl45,Rpl6,Rpl3,Mrpl40,Mrps16,Rps6,Ptcd3,Rpl22,Rpl9,Mrpl49,Rps20,Rps11,Dhx29,Mrpl9,Rpl4,Rpl7,Rpl27,Rpl28,Mrpl44,Rps10,Mrps23,Rack1	TRUE	4.23285
10	query_1	TRUE	0.0016642	979	484	75	0.154959	0.0766088	GO:0003723	GO:MF	RNA binding	12019	333	GO:0003676	IBA IEA,ISS IBA IEA,IDA IBA IEA,ISO IBA IEA,IEA,IBA IEA,IDA IEA,IBA IEA,ISS IEA,IDA IEA,IBA IEA,IBA IEA,ISO IBA,IEA,IEA,IBA IEA,IEA,IEA,IEA,ISO IBA,IEA,IDA IEA,IBA,IEA,IEA,IEA,IBA,IBA IEA,ISS ISO IEA,ISO,IBA IEA,IBA,IEA,ISS IBA IEA,ISS IBA IEA,IMP ISS IBA IEA,IBA IEA,IBA IEA,IEA,IEA,IEA,IEA,IEA,IBA IEA,IEA,IBA,IEA,IBA,IBA,ISS IBA IEA,IBA,IBA IEA,IBA IEA,IEA,IBA,IEA,ISO IBA,IEA,ISO IBA IEA,IDA ISS…	Rpl7l1,Nudt16l1,G3bp1,Ddx25,Eif5a2,Nop9,Ybx3,Nsun2,Dhfr,Nudt5,Rpl14,Lsm2,Rpl6,Drg2,Cnot8,Ptbp3,Dtd2,Stat3,Cct5,Rpl3,Dtd1,Nudt1,Snip1,Frg1,Impdh2,Sra1,Hars2,Aptx,Sart3,Rps6,Eif4e3,Wbp4,Rbm17,Ilf2,Ptcd3,Larp7,Rpl22,Exosc9,Mex3a,Rpl9,Rps20,Pus7l,Rps11,Htatsf1,Eif5a,Coil,Pus7,Tsnax,Nat10,Mtres1,Denr,Exosc2,Eif4e2,Mtrex,Dhx29,Eif3b,Rpl4,Eif1ad,Rpl7,Ybx1,Psma6,Gpkow,Snrpe,Mrpl44,Rps10,Ncbp2,Gemin5,Ddx2…	TRUE	6.39841
11	query_1	TRUE	0.0301087	6	484	5	0.0103306	0.833333	GO:0036402	GO:MF	proteasome-activating activity	12019	4979	c(\GO:0120544\", \"GO:0140657\")"	IBA,IBA,IBA IEA,IBA IEA,IBA IEA	Psmc3,Psmc4,Psmc6,Psmc2,Psmc1	TRUE	3.50294

## Sheet: Downregulated_GO_noChd8
	query	significant	p_value	term_size	query_size	intersection_size	precision	recall	term_id	source	term_name	effective_domain_size	source_order	parents	evidence_codes	intersection	highlighted	nlog10_pval
1	query_1	TRUE	4.29704e-10	666	641	86	0.134165	0.129129	GO:0099537	GO:BP	trans-synaptic signaling	11991	18865	GO:0099536	IDA IMP ISO IBA IEA,IDA IMP IBA,IDA IMP ISO IEA,NAS,ISO IEA,IDA IMP,ISO IEA,IMP,IDA IMP ISO IBA,IDA IMP IEP ISO IBA IEA,IDA IMP,IMP IBA,IDA IMP ISO IBA IEA,IDA IMP ISO,IDA IMP,IDA IMP IEA,IDA IMP TAS IEA,IDA,IDA IMP,IGI IBA,IDA IMP IEP,IBA IEA,IMP,IDA IMP IGI IBA,IDA IMP,ISO IEA,ISO IEA,IMP,IBA IEA,IBA,IDA IMP IGI IEA,IMP,IDA IMP,IDA IMP,IGI,IDA IMP ISO,IDA IMP IGI ISO IEA,IMP IGI,IMP,IMP IGI TAS…	Cplx2,Grin3a,Cnr1,Kcnd3,Egfr,Igf1,Abat,Cntnap2,Ntrk2,Syt1,Nxph1,Shisa6,Chrna4,Wnt5a,Lamp5,P2rx3,Sv2a,Gpr158,Adcy1,Lin7a,Sorcs3,Cacng5,Tmod2,Rph3a,Ina,Slc6a1,Kit,Kcnc4,Cacng2,Mctp1,Cadps2,Chrd,Syngr3,Gnao1,Lrrtm2,Ngfr,Chrna7,Nf1,Cpeb3,Psen1,Slc7a11,Hdac6,Gjd2,Trim9,Pnoc,Plppr4,Rab8a,Shisa9,Slc6a9,Braf,Dagla,Htr5a,Celf6,Pcdh17,Celf4,Slc24a2,Ptchd1,Tmem108,Cplx1,Erc2,Pclo,Crtc1,Vps18,Cntnap4,Gnai2,N…	TRUE	21.5679
2	query_1	TRUE	5.99411e-10	694	641	88	0.137285	0.126801	GO:0099536	GO:BP	synaptic signaling	11991	18864	GO:0007267	IDA IMP ISO IBA IEA,IDA IMP IBA,IDA IMP ISO IEA,NAS,ISO IEA,IDA IMP,ISO IEA,IMP,IDA IMP ISO IBA,IDA IMP IEP ISO IBA IEA,IDA IMP,IMP IBA,IDA IMP ISO IBA IEA,IDA IMP ISO,IDA IMP,IDA IMP IEA,IDA IMP TAS IEA,IDA,IDA IMP,IGI IBA,IDA IMP IEP,IBA IEA,IMP,IDA IMP IGI IBA,IDA IMP,ISO IEA,ISO IEA,IMP,IBA IEA,IBA,IDA IMP IGI IEA,IMP,IDA IMP,IDA IMP,IGI,IDA IMP ISO,IDA IMP IGI ISO IEA,IMP IGI ISO,IMP,IMP IGI…	Cplx2,Grin3a,Cnr1,Kcnd3,Egfr,Igf1,Abat,Cntnap2,Ntrk2,Syt1,Nxph1,Shisa6,Chrna4,Wnt5a,Lamp5,P2rx3,Sv2a,Gpr158,Adcy1,Lin7a,Sorcs3,Cacng5,Tmod2,Rph3a,Ina,Slc6a1,Kit,Kcnc4,Cacng2,Mctp1,Cadps2,Chrd,Syngr3,Gnao1,Lrrtm2,Ngfr,Chrna7,Nf1,Cpeb3,Psen1,Slc7a11,Hdac6,Gjd2,Trim9,Pnoc,Plppr4,Rab8a,Utrn,Shisa9,Slc6a9,Braf,Dagla,Htr5a,Celf6,Pcdh17,Celf4,Slc24a2,Ptchd1,Tmem108,Cplx1,Erc2,Pclo,Crtc1,Vps18,Cntnap4,Gn…	FALSE	21.2351
3	query_1	TRUE	1.93565e-09	659	641	84	0.131045	0.127466	GO:0098916	GO:BP	anterograde trans-synaptic signaling	11991	18700	GO:0099537	IDA IMP ISO IBA IEA,IDA IMP IBA,ISO IEA,NAS,ISO IEA,IDA IMP,ISO IEA,IMP,IDA IMP ISO IBA,IDA IMP IEP ISO IBA IEA,IDA IMP,IMP IBA,IDA IMP ISO IBA IEA,IDA IMP ISO,IDA IMP,IDA IMP IEA,IDA IMP TAS IEA,IDA,IDA IMP,IGI IBA,IDA IMP IEP,IBA IEA,IMP,IDA IMP IGI IBA,IDA IMP,ISO IEA,ISO IEA,IMP,IBA IEA,IBA,IDA IMP IGI IEA,IMP,IDA IMP,IDA IMP,IGI,IDA IMP ISO,IDA IMP IGI ISO IEA,IMP IGI,IMP,IMP IGI TAS,IMP,IEA…	Cplx2,Grin3a,Cnr1,Kcnd3,Egfr,Igf1,Abat,Cntnap2,Ntrk2,Syt1,Nxph1,Shisa6,Chrna4,Wnt5a,Lamp5,P2rx3,Sv2a,Gpr158,Adcy1,Lin7a,Sorcs3,Cacng5,Tmod2,Rph3a,Ina,Slc6a1,Kit,Kcnc4,Cacng2,Mctp1,Cadps2,Chrd,Syngr3,Gnao1,Lrrtm2,Ngfr,Chrna7,Nf1,Cpeb3,Psen1,Slc7a11,Hdac6,Gjd2,Trim9,Pnoc,Plppr4,Rab8a,Shisa9,Slc6a9,Braf,Htr5a,Celf6,Pcdh17,Celf4,Slc24a2,Ptchd1,Tmem108,Cplx1,Erc2,Pclo,Crtc1,Vps18,Cntnap4,Gnai2,Nisch,F…	FALSE	20.0628
4	query_1	TRUE	1.93565e-09	659	641	84	0.131045	0.127466	GO:0007268	GO:BP	chemical synaptic transmission	11991	2782	GO:0098916	IDA IMP ISO IBA IEA,IDA IMP IBA,ISO IEA,NAS,ISO IEA,IDA IMP,ISO IEA,IMP,IDA IMP ISO IBA,IDA IMP IEP ISO IBA IEA,IDA IMP,IMP IBA,IDA IMP ISO IBA IEA,IDA IMP ISO,IDA IMP,IDA IMP IEA,IDA IMP TAS IEA,IDA,IDA IMP,IGI IBA,IDA IMP IEP,IBA IEA,IMP,IDA IMP IGI IBA,IDA IMP,ISO IEA,ISO IEA,IMP,IBA IEA,IBA,IDA IMP IGI IEA,IMP,IDA IMP,IDA IMP,IGI,IDA IMP ISO,IDA IMP IGI ISO IEA,IMP IGI,IMP,IMP IGI TAS,IMP,IEA…	Cplx2,Grin3a,Cnr1,Kcnd3,Egfr,Igf1,Abat,Cntnap2,Ntrk2,Syt1,Nxph1,Shisa6,Chrna4,Wnt5a,Lamp5,P2rx3,Sv2a,Gpr158,Adcy1,Lin7a,Sorcs3,Cacng5,Tmod2,Rph3a,Ina,Slc6a1,Kit,Kcnc4,Cacng2,Mctp1,Cadps2,Chrd,Syngr3,Gnao1,Lrrtm2,Ngfr,Chrna7,Nf1,Cpeb3,Psen1,Slc7a11,Hdac6,Gjd2,Trim9,Pnoc,Plppr4,Rab8a,Shisa9,Slc6a9,Braf,Htr5a,Celf6,Pcdh17,Celf4,Slc24a2,Ptchd1,Tmem108,Cplx1,Erc2,Pclo,Crtc1,Vps18,Cntnap4,Gnai2,Nisch,F…	FALSE	20.0628
5	query_1	TRUE	1.19823e-07	944	641	102	0.159126	0.108051	GO:0007267	GO:BP	cell-cell signaling	11991	2781	c(\GO:0007154\", \"GO:0023052\")"	IDA IMP ISO IBA IEA,IEP IEA,IDA IMP IBA,IDA IMP ISO IEA,NAS,ISO IEA,IDA IMP,ISO IEA,IMP,IDA IMP ISO IBA,IDA IMP IEP ISO IBA IEA,IDA IMP,IMP IBA,IDA IMP ISO IBA IEA,IDA IMP ISO TAS,IDA IMP,IDA IMP IEA,IDA IMP TAS IEA,IDA,IDA IMP,ISS IEA,IGI IBA,IDA IMP IEP,IDA,IBA IEA,IMP,IDA IMP IGI IBA,IDA IMP,ISO IEA,IEA,ISO IEA,IMP,IBA IEA,IBA,IDA IMP IGI IEA,IMP,IDA IMP,IDA IMP,IGI,IDA IMP ISO,IDA IMP IGI ISO…	Cplx2,Sfrp1,Grin3a,Cnr1,Kcnd3,Egfr,Igf1,Abat,Cntnap2,Ntrk2,Syt1,Nxph1,Shisa6,Chrna4,Wnt5a,Lamp5,P2rx3,Sv2a,Gpr158,Adcy1,Tunar,Lin7a,Sorcs3,Nppc,Cacng5,Tmod2,Rph3a,Ina,Slc6a1,Rab11fip3,Kit,Kcnc4,Cacng2,Mctp1,Cadps2,Chrd,Syngr3,Gnao1,Lrrtm2,Ngfr,Chrna7,Nf1,Cpeb3,Psen1,Slc7a11,Hdac6,Gjd2,Trim9,Pnoc,Plppr4,Rab8a,Utrn,Kcna2,Irs1,Shisa9,Rbp4,Slc6a9,Braf,Dagla,Htr5a,Rab11fip2,Celf6,Pcdh17,Celf4,Slc24a2,…	FALSE	15.9372
6	query_1	TRUE	9.81475e-07	502	641	65	0.101404	0.129482	GO:0050804	GO:BP	modulation of chemical synaptic transmission	11991	13098	c(\GO:0007268\", \"GO:0099177\")"	IDA IBA,IDA IMP IBA,ISO IEA,ISO IEA,IDA IMP,IMP,IDA IMP ISO IBA,IMP ISO IEA,IDA IMP,IBA,IDA IMP,IDA IMP ISO,IDA IMP,IDA IMP,IDA,IDA IMP,IDA IMP IEP,IBA IEA,IDA IMP,ISO IEA,ISO IEA,IMP,IBA IEA,IBA,IMP,IDA IMP,IGI,IDA IMP ISO,IDA IMP IGI ISO,IMP IGI,IMP,IMP IGI TAS,IMP,IEA,IDA IMP,ISO IEA,IDA IBA,IMP,IDA IMP,IMP,IMP,IMP IBA,IMP,IBA,IBA,ISO,ISO,IEA,IDA IMP,IDA IMP ISO IEA,ISO,IDA IMP IEP,IDA IMP,IMP…	Cplx2,Grin3a,Cnr1,Egfr,Igf1,Cntnap2,Ntrk2,Syt1,Nxph1,Shisa6,Chrna4,Wnt5a,Lamp5,P2rx3,Gpr158,Adcy1,Sorcs3,Cacng5,Ina,Slc6a1,Kit,Kcnc4,Cacng2,Mctp1,Chrd,Gnao1,Lrrtm2,Ngfr,Chrna7,Nf1,Cpeb3,Psen1,Slc7a11,Hdac6,Plppr4,Rab8a,Shisa9,Slc6a9,Braf,Pcdh17,Celf4,Slc24a2,Tmem108,Cplx1,Erc2,Pclo,Crtc1,Vps18,Cntnap4,Gnai2,Nisch,Fbxl20,Nog,Map1a,Lrrc4,Nrxn1,Gria3,Ppp1r9a,Akap12,Slc38a2,Nrxn2,Sv2c,Gria1,Nr2e1,Kcn…	FALSE	13.8342
7	query_1	TRUE	1.07195e-06	503	641	65	0.101404	0.129225	GO:0099177	GO:BP	regulation of trans-synaptic signaling	11991	18834	c(\GO:0010646\", \"GO:0023051\", \"GO:0099537\")"	IDA IBA,IDA IMP IBA,ISO IEA,ISO IEA,IDA IMP,IMP,IDA IMP ISO IBA,IMP ISO IEA,IDA IMP,IBA,IDA IMP,IDA IMP ISO,IDA IMP,IDA IMP,IDA,IDA IMP,IDA IMP IEP,IBA IEA,IDA IMP,ISO IEA,ISO IEA,IMP,IBA IEA,IBA,IMP,IDA IMP,IGI,IDA IMP ISO,IDA IMP IGI ISO,IMP IGI,IMP,IMP IGI TAS,IMP,IEA,IDA IMP,ISO IEA,IDA IBA,IMP,IDA IMP,IMP,IMP,IMP IBA,IMP,IBA,IBA,ISO,ISO,IEA,IDA IMP,IDA IMP ISO IEA,ISO,IDA IMP IEP,IDA IMP,IMP…	Cplx2,Grin3a,Cnr1,Egfr,Igf1,Cntnap2,Ntrk2,Syt1,Nxph1,Shisa6,Chrna4,Wnt5a,Lamp5,P2rx3,Gpr158,Adcy1,Sorcs3,Cacng5,Ina,Slc6a1,Kit,Kcnc4,Cacng2,Mctp1,Chrd,Gnao1,Lrrtm2,Ngfr,Chrna7,Nf1,Cpeb3,Psen1,Slc7a11,Hdac6,Plppr4,Rab8a,Shisa9,Slc6a9,Braf,Pcdh17,Celf4,Slc24a2,Tmem108,Cplx1,Erc2,Pclo,Crtc1,Vps18,Cntnap4,Gnai2,Nisch,Fbxl20,Nog,Map1a,Lrrc4,Nrxn1,Gria3,Ppp1r9a,Akap12,Slc38a2,Nrxn2,Sv2c,Gria1,Nr2e1,Kcn…	FALSE	13.746
8	query_1	TRUE	3.3549e-05	184	641	33	0.0514821	0.179348	GO:0006836	GO:BP	neurotransmitter transport	11991	2498	GO:0006810	IDA IMP ISO IBA IEA,IDA IMP,ISO,IDA IMP IEP ISO IBA IEA,IEA,ISO IBA IEA,IDA IMP IEA,IDA,IGI IBA,IDA IMP IGI IBA,IDA IMP ISO IEA,IMP,IBA,IDA IMP IGI IEA,IDA IMP ISO,IMP IGI,IMP,IEA,ISO,IDA IMP IEA,IMP,IDA IMP ISO IBA IEA,IDA IMP,NAS,IEA,IDA IMP,IEA,IGI TAS,ISO,ISS ISO IEA,IGI,IDA IMP IEA,IDA IMP	Cplx2,Slc1a2,Ntrk2,Syt1,Slc6a7,Slc32a1,Sv2a,Gpr158,Lin7a,Rph3a,Slc6a1,Kcnc4,Mctp1,Cadps2,Syngr3,Nf1,Psen1,Slc6a8,Trim9,Slc6a9,Braf,Cplx1,Erc2,Pclo,Vps18,Fbxl20,Rab3b,Nrxn1,Ppp1r9a,Slc38a2,Nrxn2,Sv2c,Efr3a	FALSE	10.3025
9	query_1	TRUE	0.00012101	1164	641	109	0.170047	0.0936426	GO:0003008	GO:BP	system process	11991	1457	GO:0032501	IMP IEA,ISO IEA,IMP IGI,NAS IEA,IMP,ISO IEA,IMP,IBA IEA,IDA ISO TAS IEA,IMP,ISO IEA,IEA,IMP IGI IEA,IMP IGI ISO,IMP TAS IEA,ISO IBA,IEA,IMP IGI ISO IEA,ISO IEA,ISS IEA,IMP,IDA IMP,IGI,IEA,IGI,ISO IEA,IEA,IMP,IMP IEA,IDA ISO IEA,IMP,IBA IEA,IMP IBA,IMP ISO IEA,IMP,IEA,IMP ISO IEA,ISO,IMP,IMP IGI IBA IEA,IMP ISO,IMP,IMP,IMP,ISO,IDA IMP IGI ISO IEA,IMP,IGI,IMP IGI IEA,IMP,IMP IGI TAS IEA,IMP,IMP,IMP…	Grin3a,Cnr1,Hipk2,Kcnd3,Ei24,Egfr,Thrb,Myh8,Igf1,Heg1,Abat,Pde3a,Cntnap2,Ntrk2,Chrna4,Scn3a,Synj1,P2rx3,Adamts16,Emp2,Tbr1,Gpr158,Adcy1,Cemip,Rcan2,Plekha7,Clcn5,Sorcs3,Homer2,Nppc,Apbb2,Cacng5,Tmod2,Slc6a1,Klf15,Rab11fip3,Kit,Kcnc4,Chl1,Cacng2,Tppp,Chrd,Slc23a2,Gnao1,Ngfr,Chrna7,Jam2,Sulf2,Nf1,Cpeb3,Psen1,Slc7a11,Gjd2,Pex5,Ascl1,Ptprm,Kcnab2,Pnoc,Cflar,Kcna2,Rbp4,Braf,Adra1b,Ramp3,Col14a1,Cracd,…	FALSE	9.01964
10	query_1	TRUE	0.000516124	715	641	75	0.117005	0.104895	GO:0046903	GO:BP	secretion	11991	12263	GO:0006810	IDA IMP ISO IBA IEA,IEA,ISO IEA,IBA IEA,IBA,IEA,ISO IEA,IBA,IEA,ISO IEA,IPI ISO,IDA IMP IEP ISS ISO IBA IEA,ISS IEA,IMP,IEA,IDA IMP ISO IEA,IEA,IDA,ISS IEA,IGI IBA IEA,IMP,IEA,ISO,IBA,IDA IMP IGI IBA IEA,ISO IEA,IEA,ISS IEA,IMP,IMP,IDA IBA IEA,IBA,IDA IMP IGI IBA IEA,IDA IMP,IMP,IMP,IMP,IMP IGI,IMP,ISO,IBA IEA,IMP,IEA,IEA,IMP,IMP,IMP,IMP IBA,IMP,ISO IEA,IMP IGI,IDA IMP ISO IBA IEA,IDA IBA IEA,IMP…	Cplx2,Sfrp1,Cnr1,Rab2b,Syt13,Ncoa1,Egfr,Syt17,Igf1,Abat,Ntrk2,Syt1,Steap2,Chrna4,Arf6,Sv2a,Uprt,Gpr158,Tunar,Lin7a,Med1,Pofut2,Nppc,Stx17,Rph3a,Slc6a1,Rab11fip3,Kit,Kcnc4,Gnptab,Lgi3,Mctp1,Cadps2,Syngr3,B3glct,Gnao1,Chrna7,Nf1,Psen1,Trim9,Rab8a,Kcna2,Irs1,Rbp4,Slc6a9,Braf,Sel1l,Rab11fip2,Sec24a,Pde8b,Ccnd1,Cplx1,Rab3c,Wnk3,Erc2,Pclo,Pianp,Vps18,Gnai2,Nisch,Fbxl20,Rab3b,Exoc6b,Nrxn1,Ppp1r9a,Slc38a…	TRUE	7.56916
11	query_1	TRUE	0.000528642	145	641	27	0.0421217	0.186207	GO:0099643	GO:BP	signal release from synapse	11991	18932	c(\GO:0023061\", \"GO:0099536\")"	IDA IMP ISO IBA IEA,ISO,IDA IMP IEP ISO IBA IEA,IDA IMP,IDA,IGI IBA,IDA IMP IGI IBA,IMP,IBA,IDA IMP IGI IEA,IDA IMP,IMP IGI,IMP,ISO,IMP,IMP,IDA IMP ISO IBA,IDA IMP,NAS,IEA,IDA IMP,IGI TAS,ISO,ISS ISO IEA,IGI,IDA IMP,IDA IMP	Cplx2,Ntrk2,Syt1,Sv2a,Gpr158,Lin7a,Rph3a,Kcnc4,Mctp1,Cadps2,Syngr3,Nf1,Psen1,Trim9,Slc6a9,Braf,Cplx1,Erc2,Pclo,Vps18,Fbxl20,Nrxn1,Ppp1r9a,Slc38a2,Nrxn2,Sv2c,Efr3a	FALSE	7.5452
12	query_1	TRUE	0.000528642	145	641	27	0.0421217	0.186207	GO:0007269	GO:BP	neurotransmitter secretion	11991	2783	c(\GO:0006836\", \"GO:0007268\", \"GO:0051649\", \"GO:0099643\")"	IDA IMP ISO IBA IEA,ISO,IDA IMP IEP ISO IBA IEA,IDA IMP,IDA,IGI IBA,IDA IMP IGI IBA,IMP,IBA,IDA IMP IGI IEA,IDA IMP,IMP IGI,IMP,ISO,IMP,IMP,IDA IMP ISO IBA,IDA IMP,NAS,IEA,IDA IMP,IGI TAS,ISO,ISS ISO IEA,IGI,IDA IMP,IDA IMP	Cplx2,Ntrk2,Syt1,Sv2a,Gpr158,Lin7a,Rph3a,Kcnc4,Mctp1,Cadps2,Syngr3,Nf1,Psen1,Trim9,Slc6a9,Braf,Cplx1,Erc2,Pclo,Vps18,Fbxl20,Nrxn1,Ppp1r9a,Slc38a2,Nrxn2,Sv2c,Efr3a	FALSE	7.5452
13	query_1	TRUE	0.00133074	731	641	75	0.117005	0.102599	GO:0050877	GO:BP	nervous system process	11991	13150	GO:0003008	IMP IEA,ISO IEA,IMP,IMP,ISO IEA,IMP,IEA,IDA ISO TAS,ISO IEA,IMP IGI IEA,IMP IGI ISO,IMP TAS IEA,ISO IBA,IEA,IGI ISO IEA,IMP,IDA IMP,IGI,IEA,IGI,IMP,IMP IEA,IBA IEA,IMP,IMP ISO IEA,IMP ISO IEA,ISO,IMP,IMP IGI IBA IEA,IMP ISO,IMP,ISO,IDA IMP IGI ISO IEA,IMP,IMP IGI IEA,IMP,IMP IGI TAS IEA,IMP,IMP,IMP,IMP,IMP,IGI IBA IEA,ISS ISO IEA,IMP,IMP,IMP,IMP,IMP IBA IEA,IMP,IMP,ISO,IMP,IMP,IEA,IMP IBA IEA,IMP…	Grin3a,Cnr1,Hipk2,Ei24,Egfr,Thrb,Myh8,Igf1,Abat,Cntnap2,Ntrk2,Chrna4,Scn3a,Synj1,P2rx3,Tbr1,Gpr158,Adcy1,Cemip,Rcan2,Sorcs3,Homer2,Cacng5,Tmod2,Slc6a1,Kit,Kcnc4,Chl1,Cacng2,Tppp,Chrd,Ngfr,Chrna7,Jam2,Nf1,Cpeb3,Psen1,Slc7a11,Gjd2,Pex5,Ascl1,Kcnab2,Pnoc,Kcna2,Rbp4,Braf,Celf4,Slc24a2,Ptchd1,Pde8b,Tmem108,Pclo,Pianp,Crtc1,Cnnm4,Slc24a4,Nog,Adarb1,Map1a,Calca,Nrxn1,Gria3,Dgcr2,Ppp1r9a,Nrxn2,Ptprz1,Ccd…	FALSE	6.62202
14	query_1	TRUE	0.00265403	83	641	19	0.0296412	0.228916	GO:0140029	GO:BP	exocytic process	11991	19381	c(\GO:0006887\", \"GO:0009987\")"	IDA IMP,IDA IMP IEP,IDA IMP,IDA IMP,IDA IMP IGI,IDA IMP,IMP,IMP,IEA,IDA IMP,IEA,IDA IMP,NAS,IBA,IEA,NAS IEA,IMP,IDA IMP,ISS ISO IEA	Cplx2,Syt1,Sv2a,Rph3a,Cadps2,Syngr3,Gnao1,Psen1,Rab8a,Cplx1,Rab3c,Erc2,Pclo,Vps18,Rab3b,Exoc6b,Plek,Efr3a,Kcnb1	TRUE	5.93168
15	query_1	TRUE	0.00324771	692	641	71	0.110764	0.102601	GO:0140352	GO:BP	export from cell	11991	19493	c(\GO:0006810\", \"GO:0009987\")"	IDA IMP ISO IBA IEA,IEA,ISO IEA,IBA IEA,IBA,ISO IBA NAS IEA,ISO IEA,IBA,IEA,ISO IEA,IPI ISO,IDA IMP IEP ISS ISO IBA IEA,ISS IEA,IMP,IEA,IEA,IDA IMP,IDA,ISS IEA,IGI IBA IEA,ISO,IBA,IDA IMP IGI IBA IEA,IEA,ISS IEA,IMP,IMP,IDA IBA IEA,IBA,IDA IMP IGI IBA IEA,IDA IMP,IMP,IMP,IMP,IMP IGI,IMP,ISO,IBA IEA,IMP ISO IEA,IEA,IEA,IMP,IMP,IMP,IMP IBA,IMP,ISO IEA,IDA IMP ISO IBA IEA,ISS,IDA IBA IEA,IDA IMP,IDA…	Cplx2,Sfrp1,Cnr1,Rab2b,Syt13,Kcnd3,Egfr,Syt17,Igf1,Abat,Ntrk2,Syt1,Steap2,Chrna4,Atp2b3,Arf6,Sv2a,Gpr158,Tunar,Lin7a,Nppc,Stx17,Rph3a,Rab11fip3,Kit,Kcnc4,Gnptab,Lgi3,Mctp1,Cadps2,Syngr3,B3glct,Gnao1,Chrna7,Nf1,Psen1,Trim9,Rab8a,Kcna2,Irs1,Rbp4,Slc6a9,Braf,Sel1l,Rab11fip2,Sec24a,Pde8b,Cplx1,Slc9a1,Rab3c,Erc2,Pclo,Pianp,Vps18,Gnai2,Slc24a4,Nisch,Fbxl20,Rab3b,Exoc6b,Nrxn1,Ppp1r9a,Slc38a2,Nrxn2,P3h1,…	FALSE	5.72981
16	query_1	TRUE	0.0049375	645	641	67	0.104524	0.103876	GO:0032940	GO:BP	secretion by cell	11991	7869	c(\GO:0046903\", \"GO:0140352\")"	IDA IMP ISO IBA IEA,IEA,ISO IEA,IBA IEA,IBA,ISO IEA,IBA,IEA,ISO IEA,IPI ISO,IDA IMP IEP ISS ISO IBA IEA,ISS IEA,IMP,IEA,IDA IMP,IDA,ISS IEA,IGI IBA IEA,ISO,IBA,IDA IMP IGI IBA IEA,IEA,ISS IEA,IMP,IMP,IDA IBA IEA,IBA,IDA IMP IGI IBA IEA,IDA IMP,IMP,IMP,IMP,IMP IGI,IMP,ISO,IBA IEA,IMP,IEA,IEA,IMP,IMP,IMP,IMP IBA,IMP,ISO IEA,IDA IMP ISO IBA IEA,IDA IBA IEA,IDA IMP,IDA NAS,IMP,IBA IEA,ISO IEA,ISO,IDA…	Cplx2,Sfrp1,Cnr1,Rab2b,Syt13,Egfr,Syt17,Igf1,Abat,Ntrk2,Syt1,Steap2,Chrna4,Arf6,Sv2a,Gpr158,Tunar,Lin7a,Nppc,Stx17,Rph3a,Rab11fip3,Kit,Kcnc4,Gnptab,Lgi3,Mctp1,Cadps2,Syngr3,B3glct,Gnao1,Chrna7,Nf1,Psen1,Trim9,Rab8a,Kcna2,Irs1,Rbp4,Slc6a9,Braf,Sel1l,Rab11fip2,Sec24a,Pde8b,Cplx1,Rab3c,Erc2,Pclo,Pianp,Vps18,Gnai2,Nisch,Fbxl20,Rab3b,Exoc6b,Nrxn1,Ppp1r9a,Slc38a2,Nrxn2,P3h1,Sv2c,Plek,Sdc1,Fzd4,Efr3a,Kc…	FALSE	5.3109
17	query_1	TRUE	0.0112259	605	641	63	0.0982839	0.104132	GO:0007610	GO:BP	behavior	11991	3053	GO:0032501	ISO IEA,IMP,ISO IEA,ISO IEA,IMP,ISO,IMP ISO IEA,IMP,IMP IGI IEA,IMP ISO,IMP IEA,IMP,IMP,IMP,IEA,IMP IGI ISO,IMP,ISO,IGI,IGI,IMP,IMP,IMP,IMP ISO IEA,ISO IEA,IMP,IMP,IMP,IMP IGI ISO,IMP IGI,IMP,IMP IGI TAS IEA,IDA IMP,IMP,IMP,IMP,IMP,IMP,IMP,IMP,IMP,IMP,IMP,ISO,IMP,IMP,IMP,IMP,IMP,IMP,IMP,IMP ISO,IMP,IMP,IDA,IMP,IEA,IMP,ISO,IMP ISO IEA,IMP,IMP,IMP	Cnr1,Hipk2,Ncoa1,Egfr,Thrb,Igf1,Abat,Slc1a2,Cntnap2,Ntrk2,Chrna4,Scn3a,Alk,Gad1,Synj1,P2rx3,Tbr1,Aldh2,Adcy1,Rcan2,Sorcs3,Homer2,Tmod2,Slc6a1,Kit,Chl1,Chrd,Gnao1,Chrna7,Nf1,Cpeb3,Psen1,Slc7a11,Adam22,Kcna2,Braf,Celf6,Astn1,Pcdh17,Slc24a2,Ptchd1,Pde8b,Tshr,Cort,Inpp5f,Cntfr,Pianp,Crtc1,Cntnap4,Slc24a4,Fbxl20,Nog,Adarb1,Map1a,Calca,Nrxn1,Nrxn2,Ptprz1,Pde5a,Gria1,Atp8a1,Fzd4,Nr2e1	FALSE	4.48953
18	query_1	TRUE	7.52757e-08	486	649	66	0.101695	0.135802	GO:0097060	GO:CC	synaptic membrane	12150	2831	c(\GO:0045202\", \"GO:0098590\")"	IDA ISO IBA IEA,IDA IMP,IDA IBA IEA,IEA,ISO IEA,ISO IEA,IDA,IDA IEA,ISO,IDA IEA,IDA IMP IEP IBA IEA,IDA IMP IEP ISO IEA,ISO IEA,ISO,ISO IEA,ISO,ISO,IDA IMP IEP IEA,IDA IEP,IEA,IDA IEP IBA,ISO IBA IEA,ISO IBA IEA,ISO IEA,IDA,ISO IBA,IDA ISO IBA IEA,IDA,IEA,IDA,ISO IEA,ISO,IDA IEP ISO IEA,ISO IEA,ISO,ISO,EXP IDA,IDA ISO IBA IEA,IDA IMP IBA,IGI,IDA IEP IEA,IEA,ISO IEA,IDA IMP IEP IBA IEA,ISO IEA,IDA…	Grin3a,Cnr1,Kcnd3,Egfr,Dnm3,Slc1a2,Iqsec3,Cntnap2,Ntrk2,Syt1,Shisa6,Chrna4,Kcna3,Atp2b3,Slc6a7,Marcksl1,P2rx3,Gpr158,Adcy1,Lin7a,Sorcs3,Cacng5,Rph3a,Slc6a1,Rgs7bp,Kcnc4,Cacng2,Cadps2,Clcn2,Gnao1,Lrrtm2,Ngfr,Chrna7,Psen1,Slc6a8,Kcnab2,Dnajc6,Kcnc2,Adam22,Pnoc,Plppr4,Utrn,Kcna2,Shisa9,Slc6a9,Dagla,Vwc2,Gad2,Htr5a,Pcdh17,Gabrb1,Tmem108,Nectin1,Erc2,Cntnap4,Lrrc4,Pcdh10,Nrxn1,Gria3,Gabrq,Nrxn2,Ptprz1…	FALSE	16.4021
19	query_1	TRUE	1.88076e-07	1647	649	151	0.232666	0.0916818	GO:0045202	GO:CC	synapse	12150	2102	GO:0030054	IDA IMP ISO IBA IEA,IDA IMP ISO IBA IEA,IDA IMP IEA,IDA IBA IEA,IEA,IDA ISO IBA IEA,IEA,IDA IMP IEA,ISO IEA,IDA IMP ISO IEA,EXP IDA,IDA ISO IEA,IDA IPI IMP IEA,IDA ISO IBA IEA,IDA IMP IEP ISO IBA TAS IEA,IDA IMP,IDA IMP IEP IBA IEA,IDA IMP IEP ISO IBA IEA,ISO IEA,IDA IMP ISO IEA,ISO IEA,IDA IEA,ISO IEA,EXP IDA,ISO IEA,IDA IMP ISO IBA,ISO,IDA IMP IEA,IEA,IDA IMP ISO IEA,IDA ISS ISO IBA IEA,IDA IMP…	Cplx2,Grin3a,Cnr1,Kcnd3,Egfr,Dnm3,Syt17,Igf1,Hcn3,Slc1a2,Gng12,Iqsec3,Cntnap2,Ntrk2,Syt1,Nxph1,Shisa6,Chrna4,Kcna3,Wnt5a,Atp2b3,Samd4,Arf6,Purg,Slc6a7,Gad1,Marcksl1,Lamp5,Synj1,P2rx3,Slc32a1,Sv2a,Sst,Gpr158,Hapln1,Adcy1,Lin7a,Rgs12,Clcn5,Sorcs3,Homer2,Cap1,Cacng5,Amot,Unc5c,Tmod2,Rph3a,Ina,Psd2,Slc6a1,Ablim3,Kif3c,Rab11fip3,Rgs7bp,Epb41l3,Kcnc4,Lgi3,Agap1,Cacng2,Tppp,Mctp1,Cadps2,Chrd,Syngr3,Lasp…	FALSE	15.4864
20	query_1	TRUE	1.40851e-05	954	649	97	0.149461	0.101677	GO:0036477	GO:CC	somatodendritic compartment	12150	1684	GO:0110165	ISO IEA,ISO,IDA IEA,ISO IBA IEA,IEA,ISO IEA,ISO,ISO IBA IEA,ISO,IDA IEA,ISS ISO IBA IEA,IDA,IDA,IBA,ISO,ISO,IEA,ISO,IDA IEA,ISO,IDA ISO IBA IEA,ISO IEA,ISO IEA,ISS ISO IEA,ISO IBA,IDA IEA,ISO IEA,IDA,IDA,ISO,ISO IEA,ISO IBA,IDA,IDA,IDA,IEA,ISO IEA,IDA,ISO IEA,ISO,IDA,ISO IEA,IDA ISO IEA,IDA IEA,IDA IEA,IDA,IDA IEA,IDA IEA,IEA,IDA ISS ISO IBA IEA,IBA IEA,ISO IBA IEA,IEA,IEA,IDA IBA IEA,IDA ISO IEA…	Cplx2,Aqp11,Grin3a,Kcnd3,Ctnnd2,Dnm3,Igf1,Hcn3,Slc1a2,Cntnap2,Ntrk2,Abhd13,Cntnap3,Shisa6,Chrna4,Scn3a,Samd4,Gad1,Lamp5,P2rx3,Slc32a1,Sv2a,Sst,Rgs12,Homer2,Unc5c,Rph3a,Psd2,Slc6a1,Kif3c,Rgs7bp,Kcnc4,Chl1,Ift52,Cacng2,Unc80,Clcn2,Gnao1,Ngfr,Chrna7,Jam2,Nf1,Cpeb3,Psen1,Hdac6,Ascl1,Trim9,Alcam,Kif17,Kcnc2,Pnoc,Rab8a,Necab2,Tmem151a,Kcna2,Amigo1,Shisa9,Dagla,Gad2,Htr5a,Inpp5j,Astn1,Ptchd1,Gabrb1,Inpp…	TRUE	11.1704
21	query_1	TRUE	6.06644e-05	337	649	47	0.0724191	0.139466	GO:0045211	GO:CC	postsynaptic membrane	12150	2103	c(\GO:0097060\", \"GO:0098794\")"	IDA ISO IBA IEA,IDA IBA IEA,ISO IEA,IDA,ISO,IEA,IDA IMP IEP IBA IEA,ISO IEA,ISO IEA,IDA IMP IEP IEA,IDA IEP,IEA,IDA IEP IBA,ISO IBA IEA,ISO IBA IEA,ISO IEA,IDA,ISO IBA,IDA ISO IBA IEA,IDA,IEA,IDA,ISO IEA,IDA IEP ISO IEA,ISO,ISO,IDA IBA IEA,IDA IMP IBA,IDA IEP IEA,IEA,ISO IEA,IDA IMP IEP IBA IEA,ISO IEA,IDA ISS IBA IEA,IDA IMP,ISO IEA,IDA IEP,ISO IEA,IDA IMP IEP,IDA ISO IBA IEA,IDA,IDA ISS ISO IBA…	Grin3a,Kcnd3,Dnm3,Iqsec3,Ntrk2,Syt1,Shisa6,Chrna4,Kcna3,Gpr158,Adcy1,Lin7a,Sorcs3,Cacng5,Rph3a,Slc6a1,Rgs7bp,Kcnc4,Cacng2,Cadps2,Clcn2,Gnao1,Lrrtm2,Chrna7,Slc6a8,Kcnab2,Kcnc2,Adam22,Plppr4,Utrn,Kcna2,Shisa9,Slc6a9,Dagla,Vwc2,Htr5a,Pcdh17,Gabrb1,Tmem108,Lrrc4,Pcdh10,Gria3,Gabrq,Ptprz1,Gria1,Pcdhb16,Kcnb1	FALSE	9.71015
22	query_1	TRUE	0.000143253	748	649	79	0.121726	0.105615	GO:0098793	GO:CC	presynapse	12150	3186	c(\GO:0045202\", \"GO:0110165\")"	IDA ISO IBA IEA,IEA,IDA IMP IEA,IDA,ISO IEA,ISO IEA,IDA IMP IEA,IDA ISO IBA,IDA ISO IBA TAS IEA,IDA IMP IEP ISO,ISO IEA,ISO,ISO IEA,ISO,IDA IMP ISO IBA,ISO,IDA IEA,IEA,ISO,IDA ISS ISO IBA IEA,IDA ISO IBA IEA,IEA,IEA,IEA,IBA,IDA IMP,ISS ISO IBA IEA,ISO IEA,ISO,IDA,IDA ISO IBA,IDA IBA IEA,ISO IBA IEA,IDA IEA,IEA,IDA IEP IBA IEA,IDA,ISO,IEA,IDA IEP ISO TAS,IEA,ISO IEA,ISO IEA,IDA,EXP IDA,IDA ISO IBA…	Cplx2,Grin3a,Cnr1,Dnm3,Hcn3,Slc1a2,Cntnap2,Ntrk2,Syt1,Chrna4,Kcna3,Atp2b3,Arf6,Slc6a7,Gad1,Marcksl1,Lamp5,Synj1,P2rx3,Slc32a1,Sv2a,Gpr158,Adcy1,Lin7a,Clcn5,Cap1,Rph3a,Slc6a1,Kif3c,Rgs7bp,Kcnc4,Lgi3,Mctp1,Cadps2,Chrd,Syngr3,Gnao1,Ngfr,Daam1,Chrna7,Nf1,Psen1,Trim9,Kcnab2,Dnajc6,Kcnc2,Pnoc,Rab8a,Necab2,Kcna2,Slc6a9,Braf,Gad2,Pcdh17,Slc24a2,Gabrb1,Nectin1,Cplx1,Rab3c,Erc2,Pclo,Pianp,Vps18,Cntnap4,Fbx…	FALSE	8.8509
23	query_1	TRUE	0.000477911	714	649	75	0.115562	0.105042	GO:0030425	GO:CC	dendrite	12150	908	c(\GO:0043005\", \"GO:0097447\")"	ISO IEA,ISO,ISO IBA IEA,ISO IEA,ISO IBA IEA,ISO,IDA IEA,ISS ISO IBA IEA,IDA,IBA,ISO,IEA,IDA IEA,ISO,IDA ISO IBA IEA,ISO IEA,ISS ISO IEA,ISO IBA,IDA IEA,ISO IEA,IDA,ISO,ISO IEA,ISO IBA,IDA,IDA,IEA,ISO IEA,IDA,ISO IEA,ISO,ISO IEA,IDA ISO IEA,IDA IEA,IDA IEA,IDA IEA,IEA,IEA,IDA ISO IBA IEA,IBA IEA,ISO IBA IEA,IEA,IEA,IDA IBA IEA,IDA IEA,IDA IBA IEA,IDA IBA IEA,ISO IBA IEA,IDA,ISS IEA,ISO IEA,IDA,IEA…	Cplx2,Aqp11,Kcnd3,Dnm3,Hcn3,Slc1a2,Cntnap2,Ntrk2,Abhd13,Shisa6,Chrna4,Samd4,Lamp5,P2rx3,Slc32a1,Sv2a,Rgs12,Homer2,Unc5c,Rph3a,Psd2,Kif3c,Rgs7bp,Kcnc4,Chl1,Ift52,Unc80,Clcn2,Gnao1,Ngfr,Chrna7,Nf1,Cpeb3,Psen1,Hdac6,Trim9,Alcam,Kif17,Kcnc2,Pnoc,Rab8a,Necab2,Tmem151a,Kcna2,Amigo1,Shisa9,Dagla,Htr5a,Inpp5j,Ptchd1,Gabrb1,Inpp5f,Tmem108,Nectin1,Cplx1,Pclo,Crtc1,Cntnap4,Cnnm4,Gnai2,Dip2b,Map1a,Rgs10,Lrrc…	FALSE	7.64609
24	query_1	TRUE	0.000507763	715	649	75	0.115562	0.104895	GO:0097447	GO:CC	dendritic tree	12150	2936	c(\GO:0036477\", \"GO:0043005\")"	ISO IEA,ISO,ISO IBA IEA,ISO IEA,ISO IBA IEA,ISO,IDA IEA,ISS ISO IBA IEA,IDA,IBA,ISO,IEA,IDA IEA,ISO,IDA ISO IBA IEA,ISO IEA,ISS ISO IEA,ISO IBA,IDA IEA,ISO IEA,IDA,ISO,ISO IEA,ISO IBA,IDA,IDA,IEA,ISO IEA,IDA,ISO IEA,ISO,ISO IEA,IDA ISO IEA,IDA IEA,IDA IEA,IDA IEA,IEA,IEA,IDA ISO IBA IEA,IBA IEA,ISO IBA IEA,IEA,IEA,IDA IBA IEA,IDA IEA,IDA IBA IEA,IDA IBA IEA,ISO IBA IEA,IDA,ISS IEA,ISO IEA,IDA,IEA…	Cplx2,Aqp11,Kcnd3,Dnm3,Hcn3,Slc1a2,Cntnap2,Ntrk2,Abhd13,Shisa6,Chrna4,Samd4,Lamp5,P2rx3,Slc32a1,Sv2a,Rgs12,Homer2,Unc5c,Rph3a,Psd2,Kif3c,Rgs7bp,Kcnc4,Chl1,Ift52,Unc80,Clcn2,Gnao1,Ngfr,Chrna7,Nf1,Cpeb3,Psen1,Hdac6,Trim9,Alcam,Kif17,Kcnc2,Pnoc,Rab8a,Necab2,Tmem151a,Kcna2,Amigo1,Shisa9,Dagla,Htr5a,Inpp5j,Ptchd1,Gabrb1,Inpp5f,Tmem108,Nectin1,Cplx1,Pclo,Crtc1,Cntnap4,Cnnm4,Gnai2,Dip2b,Map1a,Rgs10,Lrrc…	FALSE	7.5855
25	query_1	TRUE	0.000515002	1021	649	97	0.149461	0.0950049	GO:0098590	GO:CC	plasma membrane region	12150	3148	c(\GO:0005886\", \"GO:0016020\")"	IDA ISO IBA IEA,IDA IMP,IDA ISO IBA IEA,IDA ISO IBA IEA,ISO IEA,IDA ISO IEA,IDA,IDA ISS IEA,ISO,IDA IEA,IDA IMP IEP IBA IEA,IDA IMP IEP ISO IEA,ISO IEA,IEA,ISO,ISS IEA,ISO IEA,ISO,IDA,ISO,IDA IEA,IDA IMP IEP IEA,IDA IEP,IDA ISO IBA IEA,IDA IEP IBA,ISO IBA IEA,ISO IBA IEA,IDA IEA,ISO IEA,ISS IBA IEA,IDA,IDA,ISO IBA,IDA ISO IBA IEA,IDA,IDA IEA,IDA ISO IEA,IDA,ISO IEA,ISO,IDA IEP ISO IEA,ISO IEA,IDA…	Grin3a,Cnr1,Kcnd3,Egfr,Dnm3,Slc1a2,Iqsec3,Cntnap2,Ntrk2,Syt1,Shisa6,Chrna4,Kcna3,Scn3a,Atp2b3,Arf6,Slc6a7,Marcksl1,Lamp5,P2rx3,Emp2,Gpr158,Adcy1,Lin7a,Sorcs3,Cacng5,Rph3a,Psd2,Slc6a1,Rab11fip3,Rgs7bp,Epb41l3,Kcnc4,Cacng2,Cadps2,Clcn2,Slc23a2,Gnao1,Lrrtm2,Ngfr,Chrna7,Psen1,Slc7a11,Hdac6,Slc6a8,Kif17,Kcnab2,Dnajc6,Kcnc2,Adam22,Pnoc,Plppr4,Rab8a,Utrn,Kcna2,Irs1,Shisa9,Eps8l1,Slc6a9,Adra1b,Dagla,Vwc2…	FALSE	7.57134
26	query_1	TRUE	0.000657089	679	649	72	0.11094	0.106038	GO:0044297	GO:CC	cell body	12150	2012	GO:0110165	ISO IEA,IDA IEA,ISO IBA IEA,IEA,ISO,ISO IEA,IDA ISO,IDA IEA,ISO,IDA,ISO,ISO,ISO IEA,ISO,ISO,ISO,ISO IEA,ISO IEA,ISO,ISO,IDA,IDA,IDA,ISO,ISO IEA,ISO IBA,ISO IEA,IDA,ISO IEA,ISO,IDA,IDA IEA,IDA,IDA,IDA ISS ISO IBA IEA,IBA IEA,ISO IEA,IDA IEA,IDA ISO IEA,IDA,ISO IEA,ISO IEA,IEA,IDA,ISO IEA,ISO,ISO,ISO,ISO,IDA,IEA,ISO IEA,ISO IEA,ISO,IDA IEA,IDA ISO IBA IEA,ISO IEA,ISO,ISO IEA,IDA,ISO,ISO IEA,ISO,ISO…	Cplx2,Grin3a,Kcnd3,Ctnnd2,Igf1,Hcn3,Slc1a2,Cntnap2,Ntrk2,Cntnap3,Chrna4,Scn3a,Pitpnm3,Alk,Gad1,P2rx3,Sv2a,Sst,Rgs12,Homer2,Unc5c,Psd2,Slc6a1,Kif3c,Rgs7bp,Kcnc4,Clcn2,Gnao1,Ngfr,Chrna7,Psen1,Hdac6,Ascl1,Alcam,Kcnc2,Pnoc,Rab8a,Kcna2,Amigo1,Braf,Gad2,Htr5a,Astn1,Inpp5f,Cplx1,Erc2,Pclo,Crtc1,Cnnm4,Gnai2,Mgat5,Slc2a13,Sos1,Pam,Dip2b,Map1a,Rgs10,Ppargc1a,Calca,Nrxn1,Gria3,Ret,Ppp1r9a,Akap12,Slc38a2,Ptp…	FALSE	7.32769
27	query_1	TRUE	0.00108745	221	649	34	0.0523883	0.153846	GO:0042734	GO:CC	presynaptic membrane	12150	1797	c(\GO:0097060\", \"GO:0098793\")"	IDA IMP,ISO IEA,IDA IEA,IDA,IDA IMP IEP ISO,ISO IEA,ISO,ISO,ISO,ISO,IEA,ISO IEA,IDA,ISO IBA,IDA,IDA,ISO,IDA IEP ISO,ISO IEA,EXP IDA,IDA ISO IBA IEA,ISO IEA,ISO IEA,IEA,IDA IEP,ISO IEA,IDA IEP IEA,ISS ISO,IDA IMP IEP IEA,IDA IMP IEA,ISO,ISA IEA,IDA IBA,ISO IEA	Cnr1,Slc1a2,Cntnap2,Syt1,Chrna4,Kcna3,Atp2b3,Slc6a7,Marcksl1,P2rx3,Gpr158,Slc6a1,Rgs7bp,Kcnc4,Cadps2,Gnao1,Ngfr,Chrna7,Psen1,Dnajc6,Kcnc2,Kcna2,Slc6a9,Gad2,Pcdh17,Gabrb1,Nectin1,Erc2,Cntnap4,Nrxn1,Gria3,Nrxn2,Cadm3,Gria1	FALSE	6.82392
28	query_1	TRUE	0.00253229	688	649	71	0.109399	0.103198	GO:0030424	GO:CC	axon	12150	907	GO:0043005	IDA IBA,IDA IEA,ISO IEA,ISO IBA IEA,IDA,IDA ISS IEA,IDA ISO IBA IEA,IDA IBA IEA,IDA,IDA ISO IBA IEA,ISO IBA,ISO,ISO,IDA,IDA IEA,IDA ISO,IDA,IDA IEA,ISO,IDA IBA,IEA,ISO,ISO IEA,IDA ISO,IDA ISO IBA,IDA IEA,ISO IEA,NAS,IBA,IEA,IEA,IDA ISO,ISO IEA,IDA IEA,IDA IEA,IDA IEA,IDA ISS ISO IBA IEA,IDA ISS ISO IBA IEA,IDA ISO IEA,IBA IEA,IEA,IEA,IDA ISO IBA IEA,ISO IEA,IDA,IDA,IDA ISO,IDA,IDA IBA IEA,ISO IEA…	Cplx2,Cnr1,Dnm3,Hcn3,Slc1a2,Cntnap2,Ntrk2,Syt1,Cntnap3,Kcna3,Scn3a,Atp2b3,Alk,Gad1,Lamp5,P2rx3,Slc32a1,Unc5c,Tmod2,Slc6a1,Ccdc120,Kif3c,Rgs7bp,Epb41l3,Kcnc4,Lgi3,Cacng2,Sema6a,Unc80,Clcn2,Ngfr,Chrna7,Nf1,Psen1,Hdac6,Alcam,Kcnab2,Kcnc2,Adam22,Pnoc,Necab2,Tmem151a,Kcna2,Amigo1,Dagla,Gad2,Inpp5j,Inpp5f,Tmem108,Nectin1,Cplx1,Erc2,Pclo,Slc2a13,Nog,Dip2b,Trim46,Map1a,Rgs10,Calca,Aak1,Nrxn1,Gria3,Ret,Fa…	FALSE	5.97863
29	query_1	TRUE	0.0031017	760	649	76	0.117103	0.1	GO:0098978	GO:CC	glutamatergic synapse	12150	3246	GO:0045202	IDA IMP,IDA IMP ISO IEA,IDA IMP,IEA,ISO IEA,IEA,IDA IMP,IDA IMP,IDA IMP IEA,ISO,IDA IMP IEP,IDA IMP,IDA IMP IEP,ISO IEA,IDA IMP ISO IEA,ISO IEA,ISO IEA,ISO,IDA IMP,IDA IMP,IDA IMP IEP,IDA,IDA IMP,ISO IEA,IEA,ISO,IDA IEP,IDA,IDA IMP,ISO,IDA IMP IEP,IDA IMP IBA,IDA,ISO IEA,IEA,IDA IMP ISO,IDA IMP,IDA IMP IEP,ISO,ISO,IDA IMP,IDA IMP IEP,ISO IEA,ISO IEA,IDA IMP IEP,IDA IMP,IDA IMP,IDA IMP IEA,EXP IDA…	Cplx2,Grin3a,Cnr1,Egfr,Dnm3,Syt17,Igf1,Slc1a2,Cntnap2,Ntrk2,Syt1,Nxph1,Shisa6,Kcna3,Wnt5a,Atp2b3,Arf6,Slc6a7,Sv2a,Adcy1,Sorcs3,Homer2,Cap1,Cacng5,Amot,Ina,Psd2,Ablim3,Rgs7bp,Kcnc4,Cacng2,Cadps2,Gnao1,Lrrtm2,Daam1,Nf1,Cpeb3,Psen1,Slc6a8,Kcnab2,Adam22,Plppr4,Rab8a,Kcna2,Shisa9,Braf,Vwc2,Elmo1,Adgra1,Pcdh17,Prkci,Arhgap39,Tmem108,Cplx1,Erc2,Pclo,Crtc1,Vps18,Fbxl20,Sos1,Nedd4l,Lrrc4,Pcdh10,Nrxn1,Gria…	FALSE	5.7758
30	query_1	TRUE	0.00316849	929	649	88	0.135593	0.0947255	GO:0098794	GO:CC	postsynapse	12150	3187	c(\GO:0045202\", \"GO:0110165\")"	ISO IEA,IDA ISO IBA IEA,IDA IBA IEA,ISO IEA,IEA,IEA,ISO,IDA IEA,IDA IMP,IDA ISO IBA IEA,IEA,IDA IMP IEP IBA IEA,ISO IEA,ISO IEA,IEA,ISO IEA,ISO IEA,IDA IMP IEP IEA,IDA IEP,IEA,IDA IEP IBA,IDA IBA IEA,IDA IMP,ISS ISO IBA IEA,IEA,ISO IBA IEA,IDA ISO IBA,IDA IEP,ISO IEA,IDA,IDA ISO IBA IEA,IDA,ISO IBA,IEA,IDA ISO IBA IEA,ISS ISO,IDA,ISO,IEA,IDA,ISO IEA,IDA IEA,IDA IEP ISO IEA,ISO IEA,IEA,ISO,IDA,IDA…	Cplx2,Grin3a,Kcnd3,Dnm3,Syt17,Igf1,Slc1a2,Iqsec3,Cntnap2,Ntrk2,Syt1,Shisa6,Chrna4,Kcna3,Wnt5a,Arf6,P2rx3,Gpr158,Adcy1,Lin7a,Sorcs3,Homer2,Cap1,Cacng5,Amot,Rph3a,Ina,Psd2,Slc6a1,Rab11fip3,Rgs7bp,Epb41l3,Kcnc4,Agap1,Cacng2,Tppp,Cadps2,Lasp1,Clcn2,Gnao1,Lrrtm2,Ngfr,Chrna7,Cpeb3,Psen1,Slc6a8,Kif17,Kcnab2,Dnajc6,Kcnc2,Adam22,Plppr4,Rab8a,Necab2,Utrn,Kcna2,Shisa9,Slc6a9,Braf,Dagla,Vwc2,Elmo1,Htr5a,Adgr…	FALSE	5.7545
31	query_1	TRUE	0.00412906	1272	649	111	0.171032	0.0872642	GO:0043005	GO:CC	neuron projection	12150	1808	GO:0120025	IDA ISO IBA IEA,ISO,IEA,IDA IEA,ISO IBA IEA,ISO IEA,ISO IBA IEA,IDA ISO,IDA IMP ISS IEA,IDA ISS ISO IBA IEA,IDA,IDA ISO IBA IEA,IDA IEA,IBA,ISO IBA IEA,IDA ISO IBA IEA,ISO IBA,ISO,IEA,ISO,IDA,IEA,IDA IEA,IDA ISO,IDA ISO IBA IEA,IDA ISO IBA IEA,ISS ISO IEA,IDA ISO IBA IEA,IDA IEA,ISO,ISS ISO IBA IEA,IDA,IDA IBA,IEA,ISO,ISO IBA IEA,IDA ISO,IDA ISO IBA,IDA IEA,IDA IEA,IDA IEA,ISO IEA,NAS,IBA IEA,ISO…	Cplx2,Aqp11,Grin3a,Cnr1,Kcnd3,Dnm3,Hcn3,Slc1a2,Cntnap2,Ntrk2,Abhd13,Syt1,Cntnap3,Shisa6,Chrna4,Kcna3,Scn3a,Atp2b3,Samd4,Alk,Gad1,Ocrl,Lamp5,P2rx3,Slc32a1,Sv2a,Rgs12,Homer2,Unc5c,Tmod2,Rph3a,Psd2,Slc6a1,Ccdc120,Kif3c,Rgs7bp,Epb41l3,Kcnc4,Chl1,Lgi3,Ift52,Cacng2,Sema6a,Unc80,Clcn2,Gnao1,Ngfr,Chrna7,Nf1,Cpeb3,Psen1,Hdac6,Trim9,Alcam,Kif17,Kcnab2,Kcnc2,Adam22,Pnoc,Rab8a,Necab2,Tmem151a,Kcna2,Amigo1,Sh…	FALSE	5.48971
32	query_1	TRUE	0.00667739	610	649	64	0.0986133	0.104918	GO:0043025	GO:CC	neuronal cell body	12150	1810	c(\GO:0036477\", \"GO:0044297\")"	ISO IEA,IDA IEA,ISO IBA IEA,IEA,ISO,ISO IEA,IDA IEA,ISO,IDA,ISO,ISO,ISO,ISO,ISO IEA,ISO IEA,ISO,ISO,IDA,IDA,IDA,ISO,ISO IEA,ISO IBA,ISO IEA,ISO IEA,ISO,IDA,IDA IEA,IDA,IDA,IDA ISS ISO IBA IEA,IBA IEA,ISO IEA,IDA IEA,IDA ISO IEA,ISO IEA,ISO IEA,IEA,IDA,ISO IEA,ISO,ISO,ISO,ISO,IEA,ISO IEA,ISO,IDA IEA,IDA ISO IBA IEA,ISO IEA,ISO,ISO IEA,IDA,ISO,ISO IEA,ISO,ISO IEA,ISO IEA,ISO,IEA,IDA ISO IEA,ISO IEA…	Cplx2,Grin3a,Kcnd3,Ctnnd2,Igf1,Hcn3,Cntnap2,Ntrk2,Cntnap3,Chrna4,Scn3a,Gad1,P2rx3,Sv2a,Sst,Rgs12,Homer2,Unc5c,Psd2,Slc6a1,Kif3c,Rgs7bp,Kcnc4,Clcn2,Ngfr,Chrna7,Psen1,Hdac6,Ascl1,Alcam,Kcnc2,Pnoc,Rab8a,Kcna2,Amigo1,Gad2,Htr5a,Astn1,Inpp5f,Cplx1,Erc2,Pclo,Crtc1,Cnnm4,Mgat5,Sos1,Pam,Dip2b,Map1a,Rgs10,Ppargc1a,Calca,Nrxn1,Gria3,Ret,Ppp1r9a,Akap12,Slc38a2,Ptprz1,Tmem266,Gria1,Flnb,Lmtk2,Kcnb1	FALSE	5.00903
33	query_1	TRUE	0.000360264	760	645	79	0.122481	0.103947	GO:0022857	GO:MF	transmembrane transporter activity	12019	3555	GO:0005215	IDA ISS IBA IEA,IDA IPI IMP ISO IBA IEA,ISO IBA IEA,IDA IBA IEA,IDA IMP ISO IBA IEA,ISS IBA IEA,ISS IBA IEA,IEA,IDA IMP IGI ISO IBA TAS IEA,IDA ISO IBA IEA,ISO TAS IEA,IBA IEA,IEA,IDA ISS ISO IBA IEA,ISS IBA IEA,IEA,IGI ISS ISO IBA TAS IEA,IDA ISS ISO IBA IEA,IEA,IBA IEA,ISO IBA IEA,ISS ISO IBA IEA,IBA IEA,IDA IMP ISO IBA IEA,ISS ISO IBA IEA,IDA IBA IEA,IMP IBA IEA,IBA,ISS ISO,IDA IMP ISS ISO IBA…	Aqp11,Grin3a,Kcnd3,Hcn3,Slc1a2,Xpr1,Abcd1,Slc36a4,Chrna4,Kcna3,Scn3a,Atp2b3,Slc22a23,Slc6a7,Sfxn3,Kcnj6,P2rx3,Slc32a1,Sv2a,Lrrc55,Clcn5,Slc25a1,Cacng5,Slc6a1,Kcnc4,Slc30a7,Cacng2,Unc80,Lasp1,Clcn2,Slc23a2,Nipal3,Chrna7,Lrrc8c,Psen1,Slc7a11,Rasa3,Slc6a8,Gjd2,Cachd1,Kcnab2,Clcn6,Slc25a16,Kcnc2,Cnnm3,Kcna2,Amigo1,Rbp4,Slc6a9,Slc16a14,Slc24a2,Gabrb1,Nalf1,Slc35e2,Slc4a3,Slc9a1,Wnk3,Cnnm4,Abcd2,Slc24a…	TRUE	7.92867
34	query_1	TRUE	0.00081837	829	645	83	0.128682	0.100121	GO:0005215	GO:MF	transporter activity	12019	1325	GO:0003674	IDA ISS IBA IEA,IDA IPI IMP ISO IBA IEA,ISO IBA IEA,IDA IBA IEA,IDA IMP ISO IBA IEA,ISS IBA IEA,ISS IBA IEA,IEA,IDA IMP IGI ISO IBA TAS IEA,IDA ISO IBA IEA,ISO TAS IEA,IBA IEA,IEA,IDA ISS ISO IBA IEA,ISS IBA IEA,IEA,IGI ISS ISO IBA TAS IEA,IDA ISS ISO IBA IEA,IEA,IBA IEA,ISO IBA IEA,ISS ISO IBA IEA,IBA IEA,IDA IMP ISO IBA IEA,ISS ISO IBA IEA,IDA IBA IEA,IMP IBA IEA,IBA,ISS ISO,IDA IMP ISS ISO IBA…	Aqp11,Grin3a,Kcnd3,Hcn3,Slc1a2,Xpr1,Abcd1,Slc36a4,Chrna4,Kcna3,Scn3a,Atp2b3,Slc22a23,Slc6a7,Sfxn3,Kcnj6,P2rx3,Slc32a1,Sv2a,Lrrc55,Clcn5,Slc25a1,Cacng5,Slc6a1,Kcnc4,Slc30a7,Cacng2,Unc80,Lasp1,Clcn2,Slc23a2,Nipal3,Chrna7,Lrrc8c,Psen1,Slc7a11,Rasa3,Slc6a8,Gjd2,Cachd1,Kcnab2,Clcn6,Slc25a16,Kcnc2,Cnnm3,Kcna2,Amigo1,Rbp4,Slc6a9,Slc16a14,Slc24a2,Gabrb1,Lmbrd1,Nalf1,Slc35e2,Slc4a3,Slc9a1,Wnk3,Cnnm4,Abcd2…	FALSE	7.1082
35	query_1	TRUE	0.00847116	545	645	59	0.0914729	0.108257	GO:0015075	GO:MF	monoatomic ion transmembrane transporter activity	12019	2249	GO:0022857	IDA IPI IMP ISO IBA IEA,ISO IBA IEA,IDA IBA IEA,IDA ISO IBA IEA,IDA IMP IGI ISO IBA TAS IEA,IDA ISO IBA IEA,ISO TAS IEA,IBA IEA,ISS ISO IBA IEA,IEA,IEA,IGI ISS ISO IBA TAS IEA,IDA ISS ISO IEA,IBA IEA,ISO IBA IEA,IBA IEA,IDA ISO IBA IEA,ISS ISO IBA IEA,IDA IBA IEA,IMP IBA IEA,IBA,ISS ISO,IDA IMP ISS ISO IBA IEA,IMP ISO IEA,IEA,IDA IMP ISO IBA IEA,IMP ISS ISO IEA,IEA,IEA,IDA ISO IBA IEA,IBA,ISS ISO…	Grin3a,Kcnd3,Hcn3,Slc1a2,Chrna4,Kcna3,Scn3a,Atp2b3,Slc6a7,Sfxn3,Kcnj6,P2rx3,Slc32a1,Lrrc55,Clcn5,Cacng5,Slc6a1,Kcnc4,Slc30a7,Cacng2,Unc80,Lasp1,Clcn2,Slc23a2,Nipal3,Chrna7,Lrrc8c,Psen1,Rasa3,Slc6a8,Cachd1,Kcnab2,Clcn6,Kcnc2,Kcna2,Amigo1,Slc6a9,Slc24a2,Gabrb1,Nalf1,Slc4a3,Slc9a1,Wnk3,Cnnm4,Slc24a4,Slc2a13,Sfxn5,Nedd4l,Lynx1,Nrxn1,Gria3,Slc39a9,Gabrq,Slc38a2,Nrxn2,Tmem266,Gria1,Ano4,Kcnb1	FALSE	4.77109
36	query_1	TRUE	1.79688e-05	261	298	39	0.130872	0.149425	REAC:R-MMU-112316	REAC	Neuronal System	5962	965	REAC:0000000	REAC,REAC,REAC,REAC,REAC,REAC,REAC,REAC,REAC,REAC,REAC,REAC,REAC,REAC,REAC,REAC,REAC,REAC,REAC,REAC,REAC,REAC,REAC,REAC,REAC,REAC,REAC,REAC,REAC,REAC,REAC,REAC,REAC,REAC,REAC,REAC,REAC,REAC,REAC	Grin3a,Kcnd3,Abat,Hcn3,Slc1a2,Gng12,Syt1,Chrna4,Kcna3,Gad1,Slc32a1,Aldh2,Adcy1,Lin7a,Homer2,Slc6a1,Epb41l3,Kcnc4,Cacng2,Lrrtm2,Chrna7,Prkacb,Gjd2,Kcnab2,Kcnc2,Kcna2,Gad2,Gabrb1,Cplx1,Gnai2,Nrxn1,Epb41l2,Gria3,Gabrq,Slc38a2,Nrxn2,Gria1,Il1rap,Kcnb1	FALSE	10.9269

## Sheet: limma_LMfit_noMed13l
	logFC	AveExpr	t	P.Value	adj.P.Val	B
Necab2	-3.48803	5.38509	-9.33288	9.21961e-13	1.56945e-08	18.593
Tmem230	3.4943	4.20655	8.92739	3.93735e-12	3.35128e-08	16.956
Sae1	1.91653	7.16102	8.03144	1.02323e-10	5.80617e-07	14.2194
Dnmt3a	-3.06344	8.33612	-7.88431	1.75621e-10	7.47401e-07	13.716
Xpc	2.41295	4.23734	7.79914	2.40228e-10	8.17879e-07	13.2111
Zeb1	-3.21283	4.59899	-7.69395	3.53859e-10	1.00396e-06	12.9483
Pttg1ip	2.06438	5.02257	7.6256	4.55239e-10	1.10708e-06	12.7342
Aqp11	-4.56667	4.02096	-7.47119	8.0481e-10	1.71254e-06	12.1023
Zmat4	4.61442	5.19019	7.37307	1.15637e-09	2.18721e-06	11.8566
Hras	-2.74025	6.89927	-7.29627	1.53591e-09	2.61458e-06	11.6427
Ankrd29	-4.66796	4.25473	-7.2269	1.98501e-09	3.07189e-06	11.2917
Elavl3	-2.64413	8.7153	-7.17603	2.39588e-09	3.37239e-06	11.2272
Pole3	3.24605	4.47887	7.15649	2.5754e-09	3.37239e-06	11.0486
Zbtb4	-2.81215	6.66176	-7.12388	2.90564e-09	3.53305e-06	11.0357
Ocrl	-2.70534	6.07168	-7.04	3.96273e-09	4.49717e-06	10.7355
Gpd2	-2.99978	6.29623	-6.99034	4.762e-09	5.06647e-06	10.5637
Igdcc4	-3.39859	5.38997	-6.96148	5.29845e-09	5.30561e-06	10.4465
Srxn1	-2.42813	5.49278	-6.94053	5.72546e-09	5.37728e-06	10.3773
Tubb4a	-2.87136	8.19266	-6.92779	6.00178e-09	5.37728e-06	10.3502
Tmem250-ps	2.39632	4.74495	6.85935	7.7308e-09	6.58007e-06	10.0523
Thbs1	-4.36322	3.98909	-6.80867	9.32472e-09	7.5588e-06	9.82131
Taf9b	-3.39473	5.15421	-6.72706	1.26086e-08	9.75619e-06	9.62219
Nat8l	2.68496	6.89725	6.6106	1.93897e-08	1.43509e-05	9.22952
Spock2	-2.77781	9.14025	-6.55871	2.3485e-08	1.66577e-05	9.04923
4931428F04Rik	1.95001	6.96019	6.36237	4.84464e-08	2.45514e-05	8.3579
Cygb	-3.43235	4.75894	-6.33498	5.35889e-08	2.45514e-05	8.24124
Slc22a17	-2.52244	8.51409	-6.35545	4.96981e-08	2.45514e-05	8.33381
Nudt16l1	2.37194	5.358	6.36048	4.87854e-08	2.45514e-05	8.34339
Synj1	-2.99302	8.06183	-6.34089	5.24352e-08	2.45514e-05	8.28273
Hcn3	-2.53742	6.20344	-6.32888	5.48055e-08	2.45514e-05	8.24
Ahcyl2	-2.52166	6.41652	-6.36966	4.71629e-08	2.45514e-05	8.383
Asb13	-2.06159	4.57787	-6.33678	5.32336e-08	2.45514e-05	8.24409
Cd99l2	-2.29428	7.2503	-6.36912	4.72573e-08	2.45514e-05	8.38179
Fam214b	2.74857	5.33092	6.36389	4.81762e-08	2.45514e-05	8.35424
Tmem260	-2.67857	3.87309	-6.40637	4.11961e-08	2.45514e-05	8.42651
Grin3a	-2.21408	5.74407	-6.35014	5.0678e-08	2.45514e-05	8.31297
Maneal	-2.07016	5.89141	-6.39863	4.23876e-08	2.45514e-05	8.48321
Shisa6	-3.91682	3.98135	-6.42146	3.89669e-08	2.45514e-05	8.49903
Hsdl1	-2.35816	6.75401	-6.27236	6.74762e-08	2.90823e-05	8.04247
Kcnd3	-2.37076	6.58951	-6.26221	7.00449e-08	2.90823e-05	8.00689
Gm2115	-7.3485	2.99531	-6.26289	6.98694e-08	2.90823e-05	7.81243
Dync1li2	1.77591	7.99966	6.25034	7.31682e-08	2.96558e-05	7.9651
Cnr1	-2.583	8.13086	-6.24028	7.59261e-08	3.00579e-05	7.92968
Micall1	-3.45712	5.5	-6.22044	8.16712e-08	3.02398e-05	7.85921
AI504432	-4.2336	5.53416	-6.22417	8.05593e-08	3.02398e-05	7.87232
Atxn7l3	-1.79581	7.54358	-6.22029	8.17148e-08	3.02398e-05	7.85994
Ppt2	2.46496	3.5028	6.1876	9.21458e-08	3.33744e-05	7.60475
Aggf1	1.80744	5.92845	6.17629	9.60538e-08	3.40651e-05	7.70613
Rcan3	-3.08272	6.8757	-6.16977	9.83807e-08	3.41782e-05	7.68348
Syt13	-3.02306	5.70839	-6.16401	1.00484e-07	3.42109e-05	7.66327
Slc1a2	-3.32068	7.63514	-6.13108	1.13391e-07	3.67278e-05	7.54764
Npc2	1.84206	6.27291	6.11869	1.18665e-07	3.67278e-05	7.50555
Bmi1	-2.92512	5.5174	-6.11999	1.18102e-07	3.67278e-05	7.50957
Rgs8	-2.83533	6.13576	-6.12631	1.15394e-07	3.67278e-05	7.53212
Sox1ot	-3.05722	4.87879	-6.1197	1.18226e-07	3.67278e-05	7.50329
Ppm1e	-2.5625	8.24567	-6.09536	1.29265e-07	3.92941e-05	7.4222
Chrna4	-3.73038	4.92902	-6.07963	1.36939e-07	4.08967e-05	7.36449
Smarcd1	1.62425	7.09168	6.06988	1.41917e-07	4.16527e-05	7.33464
Sumf1	2.93798	3.67031	6.03033	1.64043e-07	4.73307e-05	7.1003
Clock	-2.19068	5.68777	-5.96647	2.07218e-07	5.87911e-05	6.97659
Tab2	-2.18386	6.07767	-5.9486	2.21202e-07	6.173e-05	6.91393
Pgap2	-1.84449	4.22788	-5.9395	2.28676e-07	6.17897e-05	6.86145
Manbal	-2.15063	5.22918	-5.93952	2.28664e-07	6.17897e-05	6.88316
Pcdh10	-2.11887	7.69631	-5.90458	2.59775e-07	6.9096e-05	6.75778
Twnk	1.92509	4.221	5.8412	3.27329e-07	8.57248e-05	6.52163
Slc36a4	-2.92161	6.23825	-5.82414	3.48316e-07	8.84983e-05	6.48208
Myh8	-6.48278	3.50715	-5.82465	3.47668e-07	8.84983e-05	6.42887
Lpgat1	-4.61385	6.89626	-5.81028	3.66347e-07	9.17107e-05	6.43219
Aldh2	-2.37694	5.31556	-5.79007	3.94309e-07	9.72801e-05	6.3678
Ptpn12	1.84948	5.48441	5.76853	4.26434e-07	0.000103107	6.29373
Mesd	1.97808	5.41663	5.76622	4.30041e-07	0.000103107	6.28609
Ccng2	2.54525	5.6808	5.76065	4.3883e-07	0.000103753	6.26605
L3mbtl1	-2.72772	3.61273	-5.75494	4.48032e-07	0.000104477	6.20064
Top2a	-6.87733	0.517249	-5.74012	4.72825e-07	0.000108769	4.75691
1700037H04Rik	1.76146	6.17167	5.70423	5.3863e-07	0.000120646	6.06899
Ivd	-1.68664	5.66369	-5.70738	5.32499e-07	0.000120646	6.08183
Tmtc4	2.20746	4.50641	5.6978	5.51345e-07	0.00012189	6.04542
Nab1	-3.132	5.88406	-5.67563	5.97491e-07	0.000130398	5.97113
Arsb	-2.99299	3.79742	-5.65507	6.43723e-07	0.000136976	5.87837
Abat	-2.51101	7.91767	-5.65792	6.37096e-07	0.000136976	5.90299
Arfgef3	-4.20536	6.7939	-5.6151	7.43936e-07	0.00015497	5.75871
Acap2	-2.14532	6.0977	-5.61415	7.4649e-07	0.00015497	5.75883
Steap2	-3.46124	3.28941	-5.60883	7.61004e-07	0.000156079	5.68535
Gng12	-2.64971	4.11173	-5.60451	7.72991e-07	0.00015665	5.72548
Qdpr	-2.13703	5.50326	-5.55323	9.30321e-07	0.000186316	5.5558
Rimoc1	-2.49645	6.54248	-5.52325	1.03657e-06	0.00020518	5.44486
Dnm3	-2.4244	6.97798	-5.49644	1.1417e-06	0.000223393	5.35137
Nhsl2	-3.43053	3.99105	-5.46502	1.27843e-06	0.000247303	5.2539
Smarcc2	-1.38876	8.04099	-5.44707	1.36363e-06	0.000260821	5.17868
Knop1	-1.90762	5.74605	-5.43768	1.41046e-06	0.000266781	5.1588
Pde3a	-3.87364	4.08399	-5.43427	1.42782e-06	0.000267096	5.15418
Trp53inp2	-3.67849	8.02705	-5.42575	1.47218e-06	0.000272402	5.10574
Slc35f3	-2.88851	3.48824	-5.40827	1.56753e-06	0.000286925	5.03789
Ubash3b	-2.51657	5.97318	-5.38938	1.67747e-06	0.000303782	4.99222
Me3	-2.79745	4.00247	-5.38372	1.71183e-06	0.00030536	4.98325
Arf6	-2.00386	6.36314	-5.38206	1.72206e-06	0.00030536	4.96427
Ryk	2.64488	4.87315	5.35774	1.87882e-06	0.000329723	4.89954
Trim36	-2.47434	3.7349	-5.34624	1.95779e-06	0.000340077	4.84955
Pcmt1	-1.70851	6.97485	-5.3317	2.06237e-06	0.000351218	4.78983
Zkscan17	-2.01192	3.88989	-5.32361	2.12286e-06	0.000351218	4.77969
Tspyl5	-1.6169	6.05115	-5.32332	2.12509e-06	0.000351218	4.7672
St6galnac5	3.4344	5.38793	5.33066	2.06999e-06	0.000351218	4.80356
Heg1	-3.76554	3.01118	-5.32549	2.10869e-06	0.000351218	4.72683
Lrrc59	-2.40694	7.37345	-5.32035	2.14776e-06	0.000351551	4.74945
Hlcs	2.55207	3.54581	5.31468	2.1917e-06	0.000355327	4.71951
Mknk2	2.06473	6.35907	5.30339	2.28196e-06	0.000366469	4.69863
Cyb561	1.6168	6.076	5.29603	2.34275e-06	0.000369265	4.6759
Bcat2	1.9643	4.44403	5.29747	2.3307e-06	0.000369265	4.69876
Scrt1	-4.84501	5.92318	-5.29261	2.37149e-06	0.000370366	4.66593
Stk11ip	2.15833	5.5289	5.28345	2.4503e-06	0.000379195	4.64121
Fech	-1.84303	4.94962	-5.27966	2.48369e-06	0.000380899	4.63538
Sqstm1	-1.73217	8.33759	-5.26493	2.61769e-06	0.000397865	4.55773
Mid2	-3.23009	5.29388	-5.25955	2.66837e-06	0.000398453	4.56052
Tmod2	-2.49658	9.5529	-5.26049	2.6594e-06	0.000398453	4.53987
Srl	2.1391	4.58501	5.25477	2.7142e-06	0.000401772	4.55656
Ybx3	1.96843	5.90295	5.23166	2.94706e-06	0.000432481	4.461
Armt1	2.76363	3.14857	5.19362	3.37397e-06	0.000490899	4.28449
Clns1a	1.38538	6.02314	5.18379	3.49388e-06	0.000499801	4.29793
Alkbh8	-2.24046	5.21459	-5.185	3.47888e-06	0.000499801	4.31288
Snap29	2.11745	6.05313	5.17535	3.60021e-06	0.00051072	4.26978
Clcn2	-1.85162	5.00228	-5.16522	3.73191e-06	0.000525027	4.25003
Med9	-1.95907	4.9031	-5.15134	3.92029e-06	0.00054701	4.20637
Ing5	1.61085	4.01949	5.14675	3.98453e-06	0.000551453	4.19662
Slc39a6	-2.11115	7.09036	-5.1388	4.09848e-06	0.000562649	4.1382
Uhrf1	-7.1661	-0.540896	-5.11789	4.41347e-06	0.000581882	2.11715
Minpp1	1.91405	5.31666	5.11722	4.42383e-06	0.000581882	4.08726
Ski	-2.04642	7.03093	-5.11596	4.44367e-06	0.000581882	4.06112
Sfrp1	-1.91339	6.08282	-5.11646	4.43574e-06	0.000581882	4.07011
Tlcd3a	2.28773	3.79067	5.12261	4.34036e-06	0.000581882	4.11066
Ccnd1	-4.12862	3.24169	-5.12021	4.37736e-06	0.000581882	4.08064
Unc80	-2.6799	5.94754	-5.09687	4.75411e-06	0.0006131	4.00559
Scn3a	-2.07305	6.38902	-5.09823	4.73134e-06	0.0006131	4.006
Igf1	-4.20211	6.21073	-5.08059	5.03561e-06	0.000643885	3.94875
Syt9	-1.87456	5.18723	-5.07875	5.06847e-06	0.000643885	3.95865
Tet1	-2.98115	5.57367	-5.07251	5.18123e-06	0.000653334	3.92971
Cnot8	1.54909	5.76452	5.05845	5.44489e-06	0.000677317	3.88245
Amfr	-1.12365	7.39797	-5.05607	5.49079e-06	0.000677317	3.8587
Prickle1	2.98066	5.41807	5.05607	5.49078e-06	0.000677317	3.88269
Morn4	1.44503	7.32583	5.04554	5.69853e-06	0.000697886	3.8246
Hipk2	-3.16308	5.30258	-5.03607	5.89182e-06	0.000716403	3.81339
Clec2l	-2.38997	6.2467	-5.02641	6.09587e-06	0.000735957	3.76783
Rpl7l1	1.50858	5.7199	5.0122	6.40834e-06	0.000768234	3.72917
Zbtb5	1.47299	5.27613	5.00928	6.47452e-06	0.000770739	3.72909
Arhgap26	-2.20416	6.11556	-5.00621	6.54492e-06	0.000773709	3.7015
Lin7c	-2.36532	7.78434	-5.00033	6.68166e-06	0.000784426	3.67068
Epb41l3	-1.81065	7.09914	-4.98654	7.01349e-06	0.000817744	3.6284
Sv2a	-1.78317	9.40851	-4.98456	7.06238e-06	0.000817843	3.61244
Zfp975	4.43123	1.90897	4.97419	7.32425e-06	0.000842437	3.27965
Gm9776	3.81407	1.77053	4.95322	7.88347e-06	0.000894669	3.17635
Zfp862-ps	1.88784	4.83443	4.95356	7.87417e-06	0.000894669	3.55618
Vrk3	1.9785	4.22789	4.95097	7.94603e-06	0.000895796	3.55824
Gpr45	-2.08534	4.04703	-4.93636	8.3632e-06	0.000936624	3.51065
Cfap410	1.96086	4.80526	4.93124	8.51463e-06	0.00094735	3.48405
Chrd	-3.06249	3.27171	-4.92786	8.61593e-06	0.000948198	3.47078
Renbp	9.72679	-1.24819	4.926	8.67223e-06	0.000948198	-0.0119343
Ccdc85a	-2.09714	5.98393	-4.9218	8.80076e-06	0.000948198	3.42313
Myo9a	-2.41943	7.47052	-4.92366	8.74352e-06	0.000948198	3.41725
Phtf2	2.2318	5.37033	4.923	8.76386e-06	0.000948198	3.44332
Kcna3	-4.34355	3.64306	-4.90891	9.20655e-06	0.000985679	3.42136
Slc9a3r2	-2.02362	4.94793	-4.90674	9.2767e-06	0.000986983	3.39531
Hipk1	-2.18123	6.27863	-4.88809	9.90115e-06	0.00104688	3.30868
Atg4b	1.3179	6.55092	4.88356	1.00592e-05	0.00105702	3.29221
Ilrun	1.14343	7.54173	4.88076	1.01581e-05	0.00106086	3.27572
Gpr180	-1.97787	4.17279	-4.87376	1.04091e-05	0.00108045	3.30605
Dbt	-2.84503	4.07311	-4.86897	1.05846e-05	0.00109201	3.29231
Col19a1	-5.70997	3.90549	-4.85493	1.11155e-05	0.00113305	3.24797
Kif1b	-2.16415	9.75675	-4.85526	1.11027e-05	0.00113305	3.18285
Cracd	-1.97898	7.95333	-4.8437	1.15589e-05	0.0011643	3.15042
Hipk4	-4.2413	1.02673	-4.84503	1.15056e-05	0.0011643	2.68409
Cdr2l	-3.12804	4.8554	-4.83908	1.17464e-05	0.00117623	3.17717
Mmab	-1.54715	5.75198	-4.83718	1.18244e-05	0.00117711	3.14926
Zbtb41	-2.31812	5.47299	-4.82916	1.21588e-05	0.00120337	3.12729
Syt17	-2.56333	4.83768	-4.82536	1.23205e-05	0.00121232	3.13223
Nmt1	1.25339	6.97037	4.81931	1.25825e-05	0.00122395	3.07716
Chst11	2.05932	6.09508	4.82063	1.25251e-05	0.00122395	3.09126
Med12l	-3.18467	4.89143	-4.8054	1.3206e-05	0.0012773	3.06553
Sh3bgrl2	-2.05305	4.1535	-4.78882	1.39884e-05	0.00133778	3.03229
Klf9	-2.8588	5.2186	-4.78973	1.39441e-05	0.00133778	3.00566
Emp2	-2.72966	3.40032	-4.78419	1.42147e-05	0.00135183	3.01854
Lsm2	2.24199	2.99915	4.77657	1.4595e-05	0.00138007	2.95986
Polr3g	3.38607	2.22321	4.77502	1.46739e-05	0.00138007	2.81041
Mtus1	2.53808	4.31059	4.75567	1.56909e-05	0.00146762	2.9265
Tafa5	-1.62678	6.25939	-4.75353	1.5808e-05	0.00147049	2.86713
Rcan2	-3.91391	7.64999	-4.74771	1.61293e-05	0.00149222	2.83674
Mccc1	1.81971	4.01447	4.7452	1.62703e-05	0.00149713	2.89678
Pik3r4	2.02914	5.14225	4.72135	1.76681e-05	0.00161701	2.79044
Ddhd1	-1.66126	5.3957	-4.71725	1.79197e-05	0.00163127	2.76533
Tpm4	-2.60833	5.39217	-4.7065	1.85969e-05	0.00168391	2.7328
Slc22a23	-1.64236	6.6827	-4.6923	1.95302e-05	0.00175906	2.66313
2810013P06Rik	3.08341	3.99681	4.68532	2.00057e-05	0.0017924	2.70729
Capzb	1.12519	7.74872	4.67257	2.09037e-05	0.00186306	2.59202
Zim1	-2.9746	4.32424	-4.66206	2.16728e-05	0.00192154	2.62075
Cul4a	1.12433	6.26669	4.65699	2.20544e-05	0.00194525	2.55419
Serpinb9	-4.69434	1.20765	-4.65242	2.2403e-05	0.0019658	2.22355
Nucks1	-2.27172	7.44969	-4.64687	2.28345e-05	0.0019934	2.50956
Armc10	2.04317	5.09804	4.64461	2.30125e-05	0.00199423	2.54488
Tm6sf1	-3.58874	3.23332	-4.64378	2.30784e-05	0.00199423	2.57373
Atl1	1.1791	6.89533	4.63683	2.36357e-05	0.00203207	2.48236
Kctd15	-1.99442	5.02932	-4.63315	2.39355e-05	0.00203727	2.50427
Brpf3	-2.55071	4.52155	-4.63336	2.39184e-05	0.00203727	2.522
Arl2bp	1.36774	7.01535	4.63075	2.41336e-05	0.00204391	2.46176
Rpia	2.02576	3.26648	4.62375	2.47199e-05	0.0020832	2.50575
Cdc42se1	1.71092	6.16966	4.61891	2.51338e-05	0.00210765	2.4336
Lamp5	-5.36802	2.43765	-4.61661	2.53325e-05	0.0021139	2.44273
Zmpste24	-2.02024	4.08867	-4.60291	2.65498e-05	0.00220467	2.43973
St8sia5	-2.69515	3.77788	-4.5913	2.7626e-05	0.00227187	2.40953
Chd8	-1.39711	6.72996	-4.59176	2.75823e-05	0.00227187	2.3379
Atf5	-2.42584	5.72307	-4.58675	2.80585e-05	0.00229516	2.33453
Jam2	-3.60006	3.01612	-4.5855	2.81789e-05	0.00229516	2.38549
Gad2	-2.59025	8.22885	-4.5806	2.86545e-05	0.00232279	2.2905
Bcl7a	1.92175	6.73947	4.57874	2.88373e-05	0.00232653	2.29669
Myl12b	1.18024	7.64894	4.57319	2.93895e-05	0.00235989	2.27101
Adamts17	-3.21866	4.36358	-4.56495	3.02283e-05	0.00241585	2.30876
Samd4	-2.15043	5.10583	-4.56058	3.06823e-05	0.00244067	2.2698
Lrp10	-2.0186	5.18162	-4.5577	3.09859e-05	0.00245337	2.25696
Thrb	-2.35893	5.3664	-4.54899	3.19194e-05	0.00251499	2.22298
Mrfap1	1.38984	7.45559	4.54771	3.20597e-05	0.00251499	2.19043
Rfx5	-2.19619	3.31562	-4.54588	3.22593e-05	0.00251904	2.27019
2810029C07Rik	2.92645	2.30678	4.54399	3.24686e-05	0.0025238	2.15681
Sesn3	-2.55422	7.20263	-4.54138	3.27585e-05	0.00253476	2.17069
Ficd	-2.08397	3.22294	-4.52645	3.44666e-05	0.00265486	2.20879
Mitd1	2.86902	2.17312	4.52182	3.50143e-05	0.00265981	2.06909
Lactb	1.65165	3.73114	4.52224	3.49642e-05	0.00265981	2.19671
Tbr1	-2.06323	5.49581	-4.52216	3.4974e-05	0.00265981	2.1361
Slc32a1	-2.98565	6.98481	-4.52063	3.51557e-05	0.00265981	2.10581
Vegfb	-2.10549	5.25069	-4.51883	3.53722e-05	0.00265985	2.13053
Gtf3c5	1.47728	4.6546	4.51802	3.54689e-05	0.00265985	2.15629
Prkaa2	-2.74052	6.69246	-4.51178	3.62301e-05	0.00270502	2.0807
Rnf152	-2.78241	5.61645	-4.50914	3.6557e-05	0.00271751	2.08889
Rhoq	-1.97461	4.71579	-4.50353	3.72598e-05	0.00275771	2.10235
Fam91a1	-2.28972	6.38651	-4.49768	3.80075e-05	0.00280088	2.0384
Kctd10	1.75891	4.9724	4.49412	3.847e-05	0.00281062	2.06888
Fam131c	-2.93224	4.27785	-4.49437	3.84368e-05	0.00281062	2.0901
Wdpcp	2.15708	3.19821	4.4913	3.88393e-05	0.00282547	2.09457
Syn2	-2.23663	7.69766	-4.47034	4.17003e-05	0.0030207	1.93981
Uprt	-2.48911	3.6439	-4.46259	4.28088e-05	0.00308786	2.01057
Bpgm	1.63561	5.93839	4.4544	4.40115e-05	0.00316122	1.91018
Abcd1	-1.83623	4.14872	-4.45015	4.46494e-05	0.00317387	1.95699
Lgi3	-3.17602	3.02944	-4.4495	4.47471e-05	0.00317387	1.96897
Sprn	-2.64447	6.34319	-4.45142	4.4457e-05	0.00317387	1.89184
Rbbp5	1.29604	5.17819	4.44573	4.53207e-05	0.00320122	1.90623
Gad1	-1.92565	9.42967	-4.44413	4.55668e-05	0.0032053	1.84845
Edem1	-1.81423	4.52753	-4.42895	4.79638e-05	0.0033326	1.87589
Trim62	-1.60307	5.71234	-4.43099	4.76358e-05	0.0033326	1.83805
Ebf4	-2.59773	3.73974	-4.43015	4.77697e-05	0.0033326	1.90783
Sst	-3.80053	8.63558	-4.4228	4.89701e-05	0.00337955	1.78291
Fam168a	-1.4762	8.25762	-4.4224	4.90366e-05	0.00337955	1.78396
Nfic	-2.30791	4.3461	-4.41922	4.9565e-05	0.00340219	1.85127
Itgb1	1.89903	6.77995	4.41422	5.04088e-05	0.00344622	1.77031
Cnn3	1.68955	5.61726	4.41185	5.08119e-05	0.00345989	1.78446
Plch2	-1.96851	5.85767	-4.40926	5.12586e-05	0.00347639	1.76575
Gm14204	2.57685	4.16094	4.40533	5.19419e-05	0.00350876	1.82427
Ten1	1.52985	4.4226	4.39912	5.30395e-05	0.00355542	1.79259
Chml	-2.94433	5.615	-4.39906	5.30503e-05	0.00355542	1.73948
Dgkg	-2.32731	4.88297	-4.3815	5.62775e-05	0.00372278	1.71028
Ptpn4	-3.07722	6.41268	-4.38286	5.60216e-05	0.00372278	1.67313
Tceanc2	1.60776	4.75504	4.38374	5.58564e-05	0.00372278	1.73015
Scamp2	2.11977	3.89417	4.38074	5.64224e-05	0.00372278	1.75612
Arhgef40	-2.03711	3.9732	-4.37779	5.69843e-05	0.00374534	1.73824
Tex261	1.38437	5.43399	4.37199	5.8105e-05	0.00380431	1.66391
Ano10	-2.95328	4.82271	-4.36802	5.8886e-05	0.00384068	1.67105
Frem3	-5.2388	1.82319	-4.36647	5.91929e-05	0.00384596	1.60644
Braf	-2.85969	6.85173	-4.35916	6.06637e-05	0.00391166	1.59358
Chic1	-2.51622	3.72612	-4.36017	6.04588e-05	0.00391166	1.6916
Hapln1	-5.75794	6.57319	-4.35764	6.0973e-05	0.00391677	1.59104
Alkbh7	-2.3684	3.51928	-4.35117	6.23108e-05	0.0039579	1.66952
Ogfrl1	-2.42506	5.64301	-4.35307	6.19152e-05	0.0039579	1.59356
Pcdha3	-1.89628	4.05656	-4.35174	6.21916e-05	0.0039579	1.65422
Tmem38a	-1.30837	6.40149	-4.3473	6.31239e-05	0.00399373	1.56162
F2r	2.65543	3.6805	4.34626	6.33441e-05	0.00399373	1.65588
Lrrc8c	-2.36692	4.71921	-4.34454	6.37108e-05	0.00400202	1.60186
Slc38a1	-2.23501	8.0258	-4.33894	6.49176e-05	0.00406284	1.5209
Ptbp3	3.12191	4.32479	4.3337	6.60664e-05	0.00409483	1.59758
Fzd4	-3.28635	2.86054	-4.33332	6.61504e-05	0.00409483	1.61323
Mapk11	1.72336	4.19734	4.33451	6.58875e-05	0.00409483	1.60163
Trim9	-1.86055	7.08124	-4.32401	6.82445e-05	0.00416389	1.48099
Fgf12	-1.69277	7.15287	-4.32675	6.7622e-05	0.00416389	1.4894
Ttl	-1.78066	7.08378	-4.3243	6.81778e-05	0.00416389	1.48207
Tceal3	-1.56769	5.44112	-4.32523	6.79654e-05	0.00416389	1.51307
Aptx	1.71844	5.37656	4.32104	6.89253e-05	0.00419041	1.50714
Slc7a14	-1.82433	6.68625	-4.31587	7.01262e-05	0.00423319	1.45939
Klhl21	1.81149	3.93589	4.31611	7.0071e-05	0.00423319	1.55539
Slc36a1	-1.68047	5.87115	-4.31235	7.09549e-05	0.00426808	1.46117
Mtss2	-1.94882	8.18411	-4.30988	7.15435e-05	0.00428833	1.42857
Kctd3	-1.3963	7.15649	-4.30651	7.23547e-05	0.00432174	1.4256
Agk	1.3371	5.55481	4.2943	7.53638e-05	0.00448091	1.41623
Fam102a	1.62109	4.98961	4.29357	7.55462e-05	0.00448091	1.4385
Mipep	1.44508	4.80653	4.29237	7.58505e-05	0.00448334	1.44228
Odc1	1.23131	6.99145	4.29023	7.63922e-05	0.0044879	1.37721
Cemip	-3.64766	5.84116	-4.28999	7.64548e-05	0.0044879	1.39028
Ash1l	-1.98084	6.67939	-4.27903	7.92975e-05	0.00463877	1.34603
Zcchc2	-2.20759	5.04333	-4.27597	8.01103e-05	0.00467027	1.37351
Tpcn2	-5.09987	-0.30035	-4.27082	8.14967e-05	0.00472162	0.412274
Smarcd2	2.77998	3.20223	4.27063	8.15459e-05	0.00472162	1.42858
Cstf2	-1.15463	6.68188	-4.26795	8.22785e-05	0.00474789	1.30967
Stox2	-1.51245	8.22832	-4.26537	8.29881e-05	0.00475659	1.28889
Kif18b	-13.4295	-3.22975	-4.26623	8.27492e-05	0.00475659	-1.81621
Psd2	-1.39084	6.59767	-4.25686	8.53695e-05	0.00482806	1.27585
Stx16	1.10769	6.0172	4.25894	8.47817e-05	0.00482806	1.29295
Gne	-1.36729	5.15002	-4.25785	8.50893e-05	0.00482806	1.31366
Ret	-3.07816	3.77724	-4.25879	8.48225e-05	0.00482806	1.37943
Tmem176b	-1.94189	4.07346	-4.25356	8.63093e-05	0.00486505	1.35197
Bcam	-3.9879	2.29368	-4.25003	8.7327e-05	0.00490616	1.33164
Jpt1	1.23346	8.18739	4.24571	8.85889e-05	0.0049467	1.22856
Syt1	-1.67825	10.1349	-4.24557	8.86298e-05	0.0049467	1.22034
Rhou	2.57122	5.86305	4.24152	8.9832e-05	0.00499742	1.2453
Trim26	-1.84446	4.85433	-4.22934	9.35331e-05	0.00518637	1.2386
Krt1	-2.22978	3.07909	-4.22811	9.39175e-05	0.00519077	1.30261
Kcnq2	1.34281	8.82708	4.21549	9.7925e-05	0.00539475	1.13092
Fbxl16	-1.79136	7.7812	-4.21397	9.84199e-05	0.00540452	1.13155
Exoc8	-1.48229	5.43969	-4.21105	9.93772e-05	0.00543954	1.15842
Psmb10	-2.27201	4.57962	-4.20216	0.000102341	0.0055838	1.16746
Pgrmc1	-1.70694	8.86491	-4.19652	0.000104266	0.00560894	1.07127
Tppp	-3.31119	6.94282	-4.1983	0.000103657	0.00560894	1.08987
Haus4	-3.72486	1.16923	-4.19765	0.000103877	0.00560894	0.966554
Cmas	1.39557	6.98622	4.19662	0.000104234	0.00560894	1.08576
Pygo1	-1.56709	6.68235	-4.19599	0.000104449	0.00560894	1.08586
Ttc27	1.63584	4.61488	4.19088	0.000106227	0.00568648	1.14006
Slc4a8	-1.71371	6.89764	-4.1885	0.000107065	0.00569422	1.06014
Pacc1	1.81025	4.43569	4.18763	0.000107375	0.00569422	1.13962
Tmem196	-2.9458	1.94339	-4.18945	0.000106733	0.00569422	1.12022
Anapc1	-1.42168	7.13854	-4.18526	0.000108219	0.00570347	1.04782
Lama3	-3.25018	1.85332	-4.18587	0.000108001	0.00570347	1.09815
Ap1s2	-3.23167	6.09408	-4.18407	0.000108645	0.0057082	1.05906
Tmem134	1.6349	4.2886	4.18275	0.000109117	0.00571536	1.13187
Snx25	-1.5985	6.23974	-4.18171	0.000109493	0.00571749	1.04744
Copz1	1.08346	7.06507	4.17881	0.000110546	0.00575481	1.02966
Ablim3	-1.64091	7.18907	-4.17505	0.000111924	0.00580881	1.01573
Cacna1b	-1.59275	7.56372	-4.16715	0.000114878	0.00594398	0.988116
Tug1	-2.12946	7.21473	-4.16547	0.000115514	0.00595878	0.985771
Pcdha2	-2.02734	3.49563	-4.16214	0.000116792	0.00600647	1.09838
Gm4691	-8.92427	-0.92423	-4.15736	0.000118643	0.00608334	-0.21537
Rgs12	-1.73144	5.86435	-4.15623	0.000119086	0.00608771	0.977224
Tollip	-1.77862	6.80903	-4.1525	0.000120557	0.00614441	0.950453
Adamts16	-2.7378	2.05841	-4.13758	0.000126617	0.00643403	0.987321
Tmod1	-2.45524	2.76458	-4.13331	0.000128403	0.00650538	1.0197
Aen	1.50003	6.26765	4.13184	0.000129025	0.00651749	0.895246
G3bp1	1.00057	6.82355	4.12892	0.000130268	0.00654143	0.878397
Prxl2a	-1.30795	6.46883	-4.12957	0.00012999	0.00654143	0.883413
Rpl14	1.5047	7.10062	4.12294	0.00013285	0.0066515	0.857299
Pign	-2.61883	4.25108	-4.12123	0.000133598	0.00666932	0.938887
Mex3a	1.75768	5.75629	4.11935	0.000134423	0.0066909	0.870636
Sox6	-2.23651	4.88873	-4.11694	0.000135489	0.0067243	0.893968
Alg11	-1.5903	5.61831	-4.11329	0.000137119	0.0067854	0.852013
Myd88	3.55137	1.34038	4.1112	0.000138064	0.00681238	0.692837
Tarsl2	-1.40609	5.42181	-4.1058	0.000140527	0.00691385	0.837562
Plek	-2.7227	2.28426	-4.10031	0.000143076	0.00701897	0.903413
Lztr1	1.08293	7.51714	4.09444	0.000145851	0.00713454	0.765839
Dnal4	1.65665	5.03568	4.09253	0.000146763	0.00713813	0.818311
Igfbp7	-4.26784	0.491455	-4.09266	0.000146701	0.00713813	0.45446
Prdx2	1.10318	8.55833	4.08604	0.000149909	0.00726725	0.732644
Creg1	-1.4561	4.7309	-4.0853	0.000150272	0.00726725	0.804519
Btbd17	-4.26269	0.788753	-4.08292	0.000151446	0.00730144	0.539576
Kcna2	-2.21363	6.39263	-4.08213	0.000151836	0.00730144	0.738663
Nfatc3	1.76455	3.72549	4.07954	0.000153127	0.00734278	0.850116
Kcnc4	-1.71908	5.0537	-4.07245	0.00015671	0.00749345	0.749023
Adcy9	-2.48674	4.36762	-4.06941	0.000158271	0.00752585	0.775598
Lynx1	-3.1728	5.09385	-4.06998	0.000157978	0.00752585	0.738657
Nat10	1.36068	5.1104	4.06369	0.000161253	0.0076277	0.725867
Samd12	-2.22184	4.3225	-4.06295	0.000161646	0.0076277	0.760561
Nalf1	-1.84744	5.30311	-4.06273	0.000161758	0.0076277	0.708653
Marco	-14.8782	-4.82377	-4.05953	0.000163457	0.00768655	-2.84142
Pfkfb4	2.30047	4.54201	4.05259	0.000167194	0.0078406	0.727288
Astn1	-1.77599	8.41388	-4.04537	0.000171166	0.00798289	0.608538
Map1b	-2.50275	11.375	-4.04556	0.000171062	0.00798289	0.600907
Msh3	1.76456	4.17852	4.03851	0.000175028	0.00809272	0.704296
Efr3a	-1.57669	5.86976	-4.03533	0.000176848	0.00809272	0.606367
Tomm22	1.5485	6.35647	4.03555	0.000176722	0.00809272	0.599767
Agpat4	-1.22173	6.11978	-4.03588	0.000176533	0.00809272	0.603387
Nnt	-1.78821	3.40929	-4.03554	0.000176726	0.00809272	0.726139
Klhl2	1.26998	7.26823	4.03813	0.000175247	0.00809272	0.596355
Lars2	4.93111	8.02513	4.03616	0.000176371	0.00809272	0.585364
Tmem115	-1.24752	5.08222	-4.03418	0.000177513	0.00810134	0.632667
Fndc3b	-3.1717	5.36444	-4.0328	0.000178307	0.00811581	0.613957
Alcam	-2.17491	7.79338	-4.03025	0.000179794	0.00814161	0.566571
Dcaf12	-1.24341	6.28826	-4.03019	0.00017983	0.00814161	0.582698
Med18	2.8914	1.74189	4.02314	0.000183994	0.00830805	0.58352
Ube2d1	1.53978	6.28774	4.02048	0.000185589	0.00832126	0.555493
Lrrc24	-2.06006	4.26563	-4.0202	0.000185753	0.00832126	0.634172
Nxph1	-1.6236	7.41333	-4.02074	0.000185431	0.00832126	0.540998
Dhfr	2.87005	1.99645	4.01834	0.000186881	0.00834982	0.616438
Esm1	-8.51613	-0.937716	-4.01585	0.000188396	0.00839545	-0.647073
Gclm	-1.6862	5.19581	-4.01338	0.000189911	0.00844085	0.564035
Pcdha1	-3.0658	1.8484	-4.01115	0.000191289	0.00847997	0.610635
Anapc15	1.73581	3.69766	4.00832	0.000193053	0.00851384	0.640712
Cbx4	-1.74518	4.91155	-4.00853	0.000192921	0.00851384	0.562899
Naa40	1.32933	5.58287	4.00547	0.000194845	0.00857067	0.529057
Xkr4	-2.66605	6.96478	-4.00279	0.000196544	0.00862312	0.490823
Bcl2l13	-1.45594	5.93101	-3.99522	0.000201418	0.00879903	0.48455
Adgra2	-2.30196	2.07481	-3.99477	0.000201711	0.00879903	0.5882
Mas1	3.81697	1.7496	3.99387	0.0002023	0.00879903	0.492151
Zhx2	-2.39366	4.0591	-3.99338	0.000202621	0.00879903	0.565957
Khsrp	-1.34912	6.3754	-3.9897	0.000205049	0.00888178	0.459147
Mrs2	-1.80779	3.85033	-3.98541	0.000207913	0.00898301	0.556595
Arpp19	-1.56684	6.97355	-3.97807	0.000212901	0.00910869	0.416361
Agpat1	-1.22586	7.06268	-3.97861	0.000212531	0.00910869	0.416995
Mamld1	-2.63465	5.03767	-3.97986	0.000211671	0.00910869	0.470784
Scrt2	2.41166	4.51793	3.97798	0.000212962	0.00910869	0.506988
Cds2	-1.14171	9.05559	-3.97455	0.000215332	0.00918697	0.39071
4833439L19Rik	1.0859	7.21626	3.97287	0.000216506	0.00921396	0.399165
Tomm40l	-1.87967	4.25341	-3.968	0.000219937	0.00926731	0.480357
Clint1	-1.38571	5.72607	-3.96992	0.000218574	0.00926731	0.41336
Pidd1	3.0705	2.5129	3.96882	0.000219351	0.00926731	0.529638
Cachd1	-3.32552	4.45869	-3.96828	0.000219738	0.00926731	0.465176
Dlec1	4.45738	0.117106	3.96612	0.000221273	0.00930057	-0.251426
Rnf41	-1.10263	6.88001	-3.96474	0.000222263	0.00930068	0.377189
Arrdc1	-1.81823	4.11138	-3.96459	0.000222368	0.00930068	0.478758
Ahsa1	0.919147	6.5937	3.96267	0.000223748	0.00931639	0.37551
Ing3	1.72236	3.87537	3.96255	0.000223839	0.00931639	0.496308
Fbxo44	-1.6628	5.85602	-3.96007	0.000225634	0.00936571	0.380172
Tril	-5.72626	0.965679	-3.95939	0.000226124	0.00936571	0.298584
Ubl3	-1.43099	6.23328	-3.94914	0.000233716	0.0095892	0.339467
Ube2j1	-2.16859	6.98813	-3.94941	0.000233517	0.0095892	0.33001
Plcb4	-1.90037	4.73805	-3.94908	0.000233764	0.0095892	0.394863
Nalf2	2.12061	4.33291	3.94907	0.000233773	0.0095892	0.430802
Plgrkt	2.37306	4.44483	3.93894	0.000241513	0.00979416	0.393809
Dpysl4	-1.18328	6.75247	-3.93932	0.000241221	0.00979416	0.302312
Idh2	-1.47909	4.18483	-3.93879	0.000241632	0.00979416	0.39941
Mfap3l	-3.25567	6.14958	-3.94122	0.000239749	0.00979416	0.316306
Rab31	2.03866	6.30642	3.93877	0.000241646	0.00979416	0.309361
Nrxn1	-1.99072	8.71294	-3.93259	0.000246497	0.00996704	0.265757
Utp14b	-1.71756	3.71539	-3.93021	0.00024839	0.0100198	0.402054
Ccser1	-1.62933	3.85009	-3.92765	0.000250442	0.0100787	0.386922
Slc4a3	-1.84489	7.35502	-3.92531	0.000252325	0.0101305	0.253579
Mllt3	-1.65669	5.27552	-3.92038	0.000256356	0.0102681	0.281795
Sart3	1.41216	5.19423	3.91552	0.000260381	0.0103805	0.277249
Zfp652	-2.07397	5.73739	-3.91614	0.000259862	0.0103805	0.252799
Atxn3	1.79869	5.07622	3.91146	0.00026379	0.0104674	0.273518
Atp2b3	-1.44993	5.95887	-3.91173	0.000263565	0.0104674	0.232448
Slc35e2	-1.55838	5.68452	-3.9096	0.000265375	0.0105057	0.234582
Slc22a21	-2.83544	1.98736	-3.90589	0.000268545	0.0106066	0.335192
Purg	-1.88423	5.18022	-3.90298	0.000271056	0.0106563	0.234033
Arf2	1.23244	7.33361	3.90302	0.000271028	0.0106563	0.188524
Galnt9	-1.73773	4.77464	-3.90117	0.000272635	0.0106937	0.250984
Clcn3	-1.68744	7.90348	-3.89966	0.000273959	0.0107173	0.172455
Rufy2	-1.17591	6.33317	-3.89904	0.000274496	0.0107173	0.18767
Hcn2	-1.97416	6.30946	-3.89581	0.000277353	0.0108041	0.177861
Slc25a17	-1.4864	5.3264	-3.89352	0.000279392	0.0108093	0.200228
Prkag2	1.47767	6.79059	3.89365	0.000279275	0.0108093	0.166653
Nfkbil1	-2.53065	2.6376	-3.89396	0.000279002	0.0108093	0.331514
Marchf3	3.63516	1.56017	3.88692	0.000285355	0.011015	0.177151
Pck2	-2.50727	3.69555	-3.88587	0.000286307	0.0110267	0.272979
Fam186b	-3.82058	1.25472	-3.88297	0.000288977	0.0110794	0.171082
Phyhd1	3.69397	0.715114	3.88317	0.000288794	0.0110794	-0.105027
Tmem143	-1.7216	4.41983	-3.8795	0.000292195	0.0111381	0.20863
Bgn	-5.18946	0.562242	-3.88049	0.000291274	0.0111381	-0.023787
Mbtps2	-1.47979	6.02331	-3.8792	0.000292472	0.0111381	0.134542
Tspan2	-2.34089	5.29247	-3.874	0.000297372	0.0112995	0.142452
Parg	1.3757	5.61469	3.87319	0.000298144	0.0113036	0.132531
Armcx1	-1.79912	6.52306	-3.869	0.000302159	0.0114303	0.095139
Slc7a11	-4.20804	2.5973	-3.8619	0.000309073	0.0116401	0.241323
Cgnl1	-5.51461	-0.556773	-3.86221	0.000308763	0.0116401	-0.611604
Col8a1	-4.77269	0.728405	-3.8602	0.000310755	0.0116777	-0.0202555
Ilf2	0.998316	6.94803	3.85679	0.000314149	0.0117533	0.054837
Ankfy1	-1.5665	6.7089	-3.85679	0.00031415	0.0117533	0.0563684
Ssx2ip	1.67497	6.18577	3.85481	0.000316138	0.0118018	0.0618571
Zmat2	1.53294	7.04625	3.8522	0.000318775	0.0118262	0.0404099
Rragd	1.70485	6.65248	3.85266	0.0003183	0.0118262	0.0470365
Plekha7	-1.84055	3.56157	-3.8521	0.000318875	0.0118262	0.183843
Marchf6	1.41879	8.6103	3.848	0.000323056	0.0119487	0.0146357
Elovl6	-2.19454	7.03114	-3.84719	0.000323895	0.0119487	0.0241206
Marcksl1	-1.1644	9.55633	-3.84681	0.000324284	0.0119487	0.00652128
Clcn5	-1.88965	5.58549	-3.84541	0.000325732	0.0119761	0.0493562
Wasf3	-1.27382	7.15261	-3.84473	0.000326442	0.0119764	0.0158079
Kifc2	-1.34666	7.79599	-3.84376	0.00032745	0.0119807	0.00689092
Zmym3	-0.863257	7.58834	-3.84326	0.000327969	0.0119807	0.00734072
Mis18a	2.75849	2.93827	3.8374	0.000334138	0.01218	0.172327
Tmem167	-1.88285	6.36169	-3.83609	0.000335531	0.0121942	0.000430702
Cenpj	2.79227	2.54576	3.83569	0.000335961	0.0121942	0.161843
Eif4e3	1.73951	2.98126	3.83486	0.000336842	0.0122001	0.16433
Trim21	10.2254	-1.36917	3.83412	0.000337631	0.0122028	-1.76023
Rnf180	1.69739	3.72501	3.82346	0.000349255	0.0125166	0.101532
Larp7	1.76488	3.86729	3.82413	0.00034851	0.0125166	0.0947217
Gnai2	-1.80132	6.72971	-3.82346	0.000349256	0.0125166	-0.0422032
Nrn1	2.04163	5.65336	3.82423	0.000348403	0.0125166	-0.0125466
Rell2	-2.23428	5.34774	-3.82199	0.000350885	0.0125486	-0.0137736
Map2k1	-1.64363	7.0993	-3.82041	0.000352654	0.0125854	-0.05543
Masp1	-1.87718	3.79107	-3.81626	0.000357323	0.0127193	0.065927
Htra2	-1.78331	4.67181	-3.81575	0.000357902	0.0127193	0.00512266
Dpagt1	-1.46912	4.36138	-3.81398	0.000359915	0.0127377	0.0215641
Ago1	-1.89595	6.74945	-3.81399	0.000359901	0.0127377	-0.0707544
Gipc1	-1.83926	5.51809	-3.81032	0.000364114	0.0128596	-0.0539061
Dzip1l	-1.42862	4.47963	-3.8093	0.000365286	0.0128743	-0.000192555
Gpr158	-2.06856	4.57427	-3.80622	0.000368866	0.0129736	-0.0163721
Shisa9	-1.91268	6.75589	-3.80343	0.000372139	0.0130617	-0.102002
Colq	13.1195	-2.96664	3.79209	0.000385729	0.0134433	-2.82981
LOC102639719	13.1195	-2.96664	3.79209	0.000385729	0.0134433	-2.82981
Hadhb	2.12301	4.78014	3.79173	0.000386169	0.0134433	-0.0605936
Tnip2	-2.40035	3.01964	-3.79177	0.000386122	0.0134433	0.0368536
Pip4k2c	1.31112	5.31041	3.79021	0.000388029	0.0134444	-0.0979838
Slc31a2	2.44665	2.44836	3.78977	0.000388572	0.0134444	0.0332954
Nt5dc2	-3.53403	1.74732	-3.78988	0.000388429	0.0134444	-0.00662431
Rev3l	-1.65173	7.45398	-3.78507	0.000394375	0.0136175	-0.16338
Anks1	1.74047	5.75802	3.78347	0.000396376	0.0136589	-0.135916
Nrep	1.73879	9.91829	3.78185	0.000398404	0.0137011	-0.185997
Mapk9	-1.2744	7.67096	-3.781	0.000399476	0.0137102	-0.177195
Hdac6	-1.49742	6.53024	-3.7741	0.000408264	0.0139619	-0.184964
H2-Bl	-5.94368	-0.252763	-3.77396	0.000408449	0.0139619	-0.632717
Dusp4	-3.65524	5.66932	-3.77146	0.000411681	0.0139891	-0.175355
Colgalt1	1.34143	5.90558	3.77144	0.00041171	0.0139891	-0.177533
Wdr7	-1.49928	7.71934	-3.77227	0.000410629	0.0139891	-0.203236
Epas1	-5.02862	0.96763	-3.76937	0.000414407	0.0140527	-0.180396
Wdr77	1.51156	5.44697	3.76623	0.000418522	0.014164	-0.174572
Mcm5	-3.12046	1.31357	-3.76374	0.000421816	0.0142236	-0.130759
Tle5	-1.50758	8.22884	-3.76364	0.000421955	0.0142236	-0.232547
Cplx2	-1.64532	8.66559	-3.76032	0.000426377	0.0142878	-0.244769
Kics2	-1.91235	3.02096	-3.76127	0.000425111	0.0142878	-0.0477301
Arpc4	1.12179	6.43835	3.76068	0.000425905	0.0142878	-0.221135
Nopchap1	-2.02417	5.86221	-3.75512	0.000433421	0.0144722	-0.227956
Nono	-0.950546	7.53677	-3.755	0.000433579	0.0144722	-0.251931
Pla2g12a	1.29323	4.43024	3.75329	0.000435925	0.014522	-0.151204
Ptar1	-3.38397	2.31819	-3.75075	0.000439413	0.0146096	-0.0701127
Sec11a	1.68426	5.39076	3.7462	0.000445745	0.0147347	-0.230077
Mcm6	-1.63778	4.0765	-3.74556	0.000446639	0.0147347	-0.153806
Chmp2a	1.2684	6.03436	3.74613	0.00044584	0.0147347	-0.254895
Upf2	1.43389	4.61942	3.74645	0.000445396	0.0147347	-0.182982
Psmb2	1.11874	6.06913	3.74396	0.000448896	0.0147806	-0.262557
Vstm2b	-2.21265	5.32421	-3.74107	0.000452984	0.0148864	-0.248584
Pitpnm1	-1.65246	7.2768	-3.73888	0.000456103	0.01496	-0.296901
Pim2	1.08234	5.19285	3.73759	0.000457964	0.0149922	-0.246098
9430038I01Rik	2.97781	1.6518	3.7359	0.000460402	0.015043	-0.185824
Xiap	-1.6018	6.32803	-3.73403	0.000463103	0.0151023	-0.298545
Spata2l	-2.4756	4.43969	-3.72688	0.000473612	0.0154155	-0.238632
Sntb1	-4.88504	0.303692	-3.7261	0.000474772	0.0154238	-0.482865
Rad17	1.87159	4.02269	3.72406	0.000477812	0.015493	-0.202884
Col2a1	-4.13854	0.518877	-3.72298	0.000479434	0.015516	-0.423592
Mapkapk3	2.45389	2.13218	3.71728	0.000488064	0.0157653	-0.178483
Igsf1	-3.53731	2.33594	-3.71655	0.000489186	0.0157716	-0.162357
Ppp1r1c	-6.49397	1.64011	-3.7146	0.00049217	0.0158081	-0.215014
Zfp704	-1.81171	7.18458	-3.7146	0.000492175	0.0158081	-0.366616
Crim1	-2.14192	5.91008	-3.71137	0.000497175	0.0159037	-0.35637
Esrrg	-3.62527	5.05606	-3.71122	0.000497405	0.0159037	-0.324035
Fbxl2	-0.979445	5.5072	-3.71087	0.000497954	0.0159037	-0.343214
Mmp16	-1.97658	6.3391	-3.70929	0.000500415	0.0159524	-0.371425
Arnt2	-1.4243	8.81968	-3.70773	0.000502864	0.0160005	-0.399223
Iqsec3	-1.82076	6.78921	-3.70702	0.000503985	0.0160062	-0.384216
Chd1l	2.23397	2.11001	3.70583	0.000505869	0.0160361	-0.21068
Mgat2	-1.48571	5.59852	-3.70501	0.000507156	0.0160471	-0.363869
Usp11	-1.16402	7.59081	-3.7003	0.000514686	0.0162186	-0.411986
Endod1	-1.03383	6.26823	-3.69853	0.000517535	0.0162186	-0.400491
Vash2	1.28448	5.53014	3.69962	0.000515779	0.0162186	-0.37217
Ipo8	1.29088	5.27902	3.69806	0.000518295	0.0162186	-0.3622
Eif5a2	1.9008	5.88321	3.69863	0.000517381	0.0162186	-0.387371
Gm15638	-11.8624	-3.33341	-3.69906	0.000516682	0.0162186	-2.5139
Wars2	-1.93049	2.66199	-3.6966	0.00052066	0.0162243	-0.216832
Hars2	1.46611	4.81763	3.69509	0.000523127	0.0162243	-0.344305
Egfr	-2.96484	3.97154	-3.69536	0.000522686	0.0162243	-0.29497
Rph3a	-1.43553	7.34743	-3.69709	0.000519862	0.0162243	-0.418968
Vwc2	-2.46772	2.9747	-3.69502	0.000523242	0.0162243	-0.231407
Mthfd1	1.3895	5.12166	3.69416	0.000524649	0.0162384	-0.366576
Ndufaf7	1.20773	5.26425	3.69296	0.000526614	0.0162696	-0.37858
Shisa4	-1.1901	5.87455	-3.68671	0.000536975	0.0165297	-0.425496
Tmc7	2.13329	3.73169	3.68715	0.000536249	0.0165297	-0.284351
Tbc1d7	1.27781	4.30416	3.68542	0.000539149	0.0165667	-0.336166
Slc6a7	-2.06531	5.75351	-3.68437	0.000540906	0.0165907	-0.429253
Pcolce2	-4.33651	0.0892611	-3.68228	0.00054445	0.0166395	-0.680682
Fam167a	-2.20269	2.88534	-3.68242	0.000544202	0.0166395	-0.262482
Ercc6l2	1.83465	4.07362	3.67618	0.000554886	0.016928	-0.340425
Btbd11	-2.12927	5.18662	-3.67493	0.000557053	0.0169334	-0.432931
Ak2	1.48175	4.77726	3.6753	0.000556407	0.0169334	-0.39766
Tmem161a	1.29576	5.20296	3.67359	0.000559377	0.0169428	-0.430857
Mmd2	-1.88202	6.30409	-3.67247	0.000561342	0.0169428	-0.475881
Unc5c	-2.66689	6.72136	-3.67351	0.000559522	0.0169428	-0.480608
Wdfy1	-1.55677	4.07271	-3.67287	0.000560633	0.0169428	-0.363593
Lsamp	-1.77396	9.15918	-3.67169	0.000562708	0.0169539	-0.505248
Snx17	-1.26655	5.81357	-3.67053	0.000564742	0.0169852	-0.470033
Dusp23	-1.93105	2.56746	-3.66943	0.000566669	0.0170131	-0.290216
Nid1	-3.3941	1.38164	-3.66665	0.000571604	0.0170393	-0.363452
Ncbp2	1.43959	5.67946	3.66611	0.000572548	0.0170393	-0.474539
Camkk2	1.99215	6.56696	3.66682	0.000571295	0.0170393	-0.494916
Zfp941	-1.90507	4.90307	-3.66814	0.000568958	0.0170393	-0.434833
Unc5d	-1.76416	6.62345	-3.66625	0.000572304	0.0170393	-0.499609
Pde12	-1.30356	4.87975	-3.66394	0.00057643	0.0171249	-0.445427
Polr1has	3.07797	1.21474	3.66151	0.000580796	0.0172245	-0.461638
Klf15	-2.1208	3.05833	-3.66067	0.000582324	0.0172398	-0.33039
Pja1	-0.797063	7.96816	-3.65907	0.000585225	0.0172864	-0.534303
Pla2r1	-12.2368	-3.89872	-3.65868	0.000585934	0.0172864	-2.82066
Nrm	3.23913	1.55397	3.65813	0.000586944	0.0172864	-0.407342
Eif2b3	1.294	4.16259	3.65738	0.000588294	0.0172963	-0.405224
Snip1	1.30462	4.02292	3.65667	0.000589603	0.0173048	-0.396246
Rab2b	-1.46162	3.48646	-3.65445	0.000593675	0.0173645	-0.369984
Nfxl1	-1.87156	4.12492	-3.65478	0.000593067	0.0173645	-0.419668
Tbc1d22b	-1.1917	6.00952	-3.65146	0.000599226	0.0174728	-0.531075
Panx2	-2.39442	5.77613	-3.65135	0.00059943	0.0174728	-0.523202
Qrfprl	-5.43789	0.228418	-3.64925	0.00060334	0.0175567	-0.689063
Nudt5	1.74402	4.30538	3.64766	0.000606322	0.0176051	-0.439353
Slc39a9	-1.50334	5.86189	-3.64726	0.000607074	0.0176051	-0.539093
Smim13	-1.25149	7.49578	-3.64651	0.000608494	0.0176163	-0.566431
Dtd2	1.99203	2.85468	3.64521	0.000610949	0.0176274	-0.357998
Tmem151b	-2.07768	7.68985	-3.64563	0.00061015	0.0176274	-0.570984
Med1	-1.41957	6.00865	-3.63696	0.000626774	0.0179128	-0.571725
Rnf144a	1.61218	4.92816	3.63628	0.000628087	0.0179128	-0.516857
Carmil3	-1.41398	7.47568	-3.63818	0.000624415	0.0179128	-0.590298
Cplx3	-5.47492	0.324002	-3.63938	0.000622089	0.0179128	-0.674545
Gpr135	-2.56919	2.51556	-3.63785	0.00062505	0.0179128	-0.375588
Gjd2	-1.42921	5.31383	-3.63728	0.000626151	0.0179128	-0.546541
Nudt10	2.59363	4.38431	3.63622	0.000628204	0.0179128	-0.475272
Zfp961	2.62965	3.35819	3.63355	0.000633418	0.0180011	-0.409484
Maf	-1.92589	5.54315	-3.63408	0.000632382	0.0180011	-0.565306
Camta1	1.33271	8.12462	3.63253	0.000635434	0.0180283	-0.611061
C1qtnf1	3.65468	1.93875	3.63113	0.000638196	0.0180766	-0.431277
Vgll2	-9.1902	-1.24841	-3.6304	0.000639644	0.0180875	-1.47114
Styk1	2.21353	2.2214	3.62854	0.000643327	0.0181614	-0.408026
Mchr1	-1.84979	2.74357	-3.6278	0.000644811	0.0181732	-0.40718
Lgalsl	-1.38743	7.30492	-3.62658	0.000647242	0.0181815	-0.621783
Gemin2	2.60598	2.68651	3.62679	0.000646813	0.0181815	-0.404926
Efcab2	-2.46842	3.75881	-3.62348	0.000653472	0.0182119	-0.480203
Mindy2	-1.7903	6.50957	-3.62385	0.000652719	0.0182119	-0.619172
Insig1	-1.73586	7.1541	-3.62541	0.000649585	0.0182119	-0.623692
Usp31	-1.49438	6.53081	-3.62488	0.000650649	0.0182119	-0.617228
Frg2f1	1.89264	3.66422	3.62338	0.000653673	0.0182119	-0.459239
Cd24a	3.07584	8.10239	3.62003	0.00066048	0.018371	-0.64593
Vsig10l	-2.81328	1.60304	-3.61951	0.000661542	0.018371	-0.459282
Miga1	1.75912	6.14046	3.61751	0.000665641	0.0184547	-0.627344
Tubg1	1.15726	5.12283	3.61625	0.000668244	0.0184968	-0.590031
Usp27x	-1.08387	4.35532	-3.6139	0.000673113	0.0186013	-0.550624
Isca1	-1.34609	6.3202	-3.6098	0.000681685	0.0188077	-0.656416
Nop9	1.21932	4.6455	3.60695	0.000687704	0.0189162	-0.584411
Grem2	-1.77254	5.15833	-3.60689	0.000687841	0.0189162	-0.623597
Htr5a	-2.01096	4.01673	-3.60096	0.00070053	0.0191491	-0.563334
Plppr4	-1.44389	8.77171	-3.60094	0.000700568	0.0191491	-0.706706
Ube2n	-1.17381	7.41536	-3.6019	0.000698509	0.0191491	-0.693432
Lrrc55	-3.14229	5.18321	-3.60083	0.00070081	0.0191491	-0.646765
Shtn1	1.13607	7.79257	3.60006	0.000702472	0.0191638	-0.701278
Rnf6	1.0778	5.46507	3.59221	0.000719658	0.0196012	-0.677279
Fancc	1.78562	2.95469	3.58923	0.000726307	0.0197444	-0.512686
Nudt1	2.5284	2.76185	3.5886	0.000727701	0.0197444	-0.508243
Mkx	-2.01457	2.84674	-3.58829	0.000728395	0.0197444	-0.518316
Man1b1	0.922148	6.29314	3.58733	0.000730564	0.0197717	-0.717863
Brd4	-1.93603	6.69063	-3.58644	0.000732551	0.019794	-0.729315
Ccdc149	-2.06093	4.94218	-3.58327	0.000739735	0.0199564	-0.680304
Ano4	-2.01206	4.28587	-3.58033	0.000746449	0.0201057	-0.642109
Alk	-2.84775	2.9843	-3.57972	0.000747868	0.0201121	-0.548213
Tacc1	-1.54442	6.23139	-3.57895	0.000749622	0.0201275	-0.74269
Hipk3	-1.78077	6.73822	-3.5777	0.000752503	0.0201533	-0.754296
Phc2	1.35275	5.98303	3.577	0.000754135	0.0201533	-0.739457
Calca	-3.7381	1.38486	-3.57713	0.000753822	0.0201533	-0.589094
Apbb2	-1.34464	5.6283	-3.57596	0.000756554	0.0201862	-0.733422
Slc30a7	-1.30509	4.65323	-3.57522	0.00075827	0.0202004	-0.682046
Adgra1	-1.66279	5.07514	-3.57367	0.000761887	0.0202334	-0.714565
F830016B08Rik	-9.85026	-2.36991	-3.57404	0.000761017	0.0202334	-2.14474
Angpt2	-7.42868	-1.46791	-3.56959	0.000771487	0.0204515	-1.66325
Frg1	1.64804	4.21059	3.56916	0.000772504	0.0204515	-0.655032
Fgd5	-2.43737	2.88758	-3.56725	0.000777042	0.0205397	-0.57716
Asap2	-1.28017	5.11625	-3.56585	0.0007804	0.0205965	-0.738555
Cmtm6	1.9171	3.05034	3.56488	0.000782725	0.0206259	-0.582799
Sdc1	-3.031	3.47379	-3.56138	0.000791166	0.0207843	-0.626851
Plp1	3.1882	2.0278	3.56087	0.0007924	0.0207843	-0.597029
Kcnq3	-2.59167	6.61876	-3.56103	0.000792023	0.0207843	-0.799426
Ctnnd2	-1.21124	7.98646	-3.55911	0.000796697	0.0208649	-0.820366
Tbc1d13	-1.19391	6.46428	-3.55606	0.000804163	0.0210281	-0.811517
Tshz2	-3.68814	1.26054	-3.55505	0.000806667	0.0210612	-0.659886
Gga2	1.26794	5.67443	3.55222	0.000813676	0.0212027	-0.798679
Lyplal1	-2.30138	2.57356	-3.55186	0.000814579	0.0212027	-0.607504
Tmem26	-9.12209	-2.64063	-3.55064	0.000817626	0.0212495	-2.33186
Ntrk2	-1.56168	9.20823	-3.54839	0.000823271	0.0213636	-0.858298
Fam43a	-3.29782	4.21736	-3.54677	0.000827371	0.0214374	-0.733178
Hmx1	12.1632	-2.10562	3.54498	0.000831915	0.0215223	-2.60103
Fstl5	-2.09868	6.5368	-3.5407	0.000842873	0.0217397	-0.856753
Gm16210	-10.613	-2.10959	-3.5411	0.000841837	0.0217397	-2.02037
Bcas2	0.976572	6.07183	3.53706	0.00085231	0.0219167	-0.855795
Tacc2	0.977731	6.69305	3.53745	0.000851277	0.0219167	-0.866449
Rundc3b	1.33553	6.564	3.53274	0.000863614	0.0221739	-0.877552
Rgs14	2.86183	2.8281	3.53085	0.000868634	0.0222692	-0.664082
Gabrr2	-5.90816	-1.01483	-3.53023	0.000870268	0.0222775	-1.50523
Nars	-1.70862	8.09351	-3.52793	0.000876395	0.0224007	-0.909512
Cdk4	1.12081	6.02154	3.52374	0.000887668	0.0226548	-0.891376
Dnal1	-1.70636	6.26324	-3.52199	0.000892417	0.0227419	-0.903714
Ddx25	0.968637	6.63477	3.5199	0.00089813	0.0228313	-0.915202
Irf2bpl	-1.86603	6.30476	-3.51972	0.000898607	0.0228313	-0.912014
Pigc	1.37196	3.79726	3.51893	0.000900791	0.0228527	-0.761465
Macroh2a1	0.923068	6.00274	3.51245	0.000918751	0.0232737	-0.923044
Cript	1.73104	6.07942	3.50878	0.000929064	0.0233611	-0.934457
Mad2l2	2.08896	3.65202	3.50908	0.000928198	0.0233611	-0.770947
Npy5r	-5.13245	-0.431566	-3.50915	0.000928014	0.0233611	-1.26052
Sorcs3	-1.9487	5.51541	-3.50998	0.000925669	0.0233611	-0.916654
St6galnac4	-1.3603	4.85267	-3.51032	0.000924708	0.0233611	-0.877574
Mafb	-1.82528	3.18207	-3.50648	0.000935582	0.0234903	-0.757735
Cacng5	-2.88556	4.51973	-3.50471	0.00094063	0.0235822	-0.873469
Slc7a5	-1.64953	7.46916	-3.50376	0.000943361	0.0236159	-0.972072
Porcn	-1.34008	5.34427	-3.50211	0.00094809	0.0236995	-0.928762
Stard3nl	1.12934	6.16292	3.50051	0.000952731	0.0237806	-0.960518
Zfp846	-1.25468	4.97371	-3.49889	0.000957438	0.0238631	-0.917437
Nsun2	0.865367	6.32808	3.49696	0.000963059	0.0239449	-0.97431
Vstm2a	-1.60487	7.2199	-3.4968	0.000963536	0.0239449	-0.988762
Itsn2	-1.64976	5.02807	-3.49282	0.000975241	0.0241653	-0.93863
Trim67	-1.32243	7.72087	-3.49309	0.000974445	0.0241653	-1.00432
Pcdh17	-2.2358	7.29447	-3.49223	0.000976986	0.0241733	-1.00283
Nrg3	-1.4004	5.5126	-3.49076	0.000981371	0.0242466	-0.969309
[truncated: 16,334 more rows]

## Sheet: Upregulated_GO_noMed13l
No results

[truncated: 1 more sheets: Downregulated_GO_noMed13l]
