# Supplementary material for: Autism spectrum disorder–risk genes have convergent effects on transcription and neuronal firing patterns in primary neurons
Source: HighWire-hosted journal article supplement (doi:10.1101/gr.280698.125), 2025-10-20
Supplement: Supplemental_Table_S10.xlsx [file Supplemental_Table_S10.xlsx]

## Sheet: Legend
Supplemental Data Table 10. MEA metric groups RNA-seq comparisons.

## Sheet: MEA Set1 v Set2
Gene	baseMean	log2FoldChange	lfcSE	stat	pvalue	padj
Abhd13	1665.78	-0.933617	0.0902858	-10.3407	4.61221e-25	7.45195e-21
Mgat4a	1125.31	-0.502442	0.0489523	-10.2639	1.02462e-24	8.27741e-21
Mtss1	6065.5	-0.469942	0.047285	-9.93849	2.83091e-23	1.52463e-19
Wdr73	961.287	0.421276	0.0426297	9.88222	4.97202e-23	2.00832e-19
Timmdc1	812.912	0.51111	0.0527615	9.68717	3.41869e-22	1.10471e-18
Med1	2092.5	-0.439688	0.0478858	-9.182	4.23142e-20	1.13945e-16
Ralgds	3775.2	-0.46966	0.0519199	-9.04586	1.48494e-19	3.42746e-16
Dusp22	421.616	-0.622523	0.0705524	-8.82356	1.1088e-18	2.23936e-15
Fgfr1op2	967.301	0.814955	0.0928778	8.77449	1.71681e-18	3.08206e-15
Habp4	3766.15	0.377159	0.04353	8.66436	4.54046e-18	7.33602e-15
Maea	3480.16	0.592506	0.0692264	8.55895	1.139e-17	1.67298e-14
Zmat4	1118.9	-1.26852	0.150079	-8.45231	2.85586e-17	3.84517e-14
Mettl1	458.716	0.475349	0.0569171	8.3516	6.73457e-17	7.77218e-14
Pde5a	122.186	-0.828703	0.0991263	-8.36007	6.26824e-17	7.77218e-14
Tfrc	13398.6	1.04948	0.125906	8.33542	7.72243e-17	8.31809e-14
E2f6	558.134	0.695661	0.0839076	8.2908	1.12492e-16	1.13596e-13
Sox12	3209.65	-0.423351	0.0514238	-8.23259	1.83214e-16	1.74128e-13
Ptpn1	3270.83	-0.445231	0.0547421	-8.13325	4.17937e-16	3.58322e-13
Fam171a1	2094.51	0.358187	0.0440452	8.13226	4.21373e-16	3.58322e-13
Tmem170b	4352.41	-0.520568	0.0641462	-8.11534	4.84433e-16	3.91349e-13
Dchs1	4086.97	-0.472464	0.0588148	-8.03308	9.5057e-16	7.3135e-13
Prex2	155.092	0.657286	0.0820199	8.01374	1.11275e-15	8.17214e-13
Bnip5	232.174	-0.56643	0.0710922	-7.96753	1.61875e-15	1.13713e-12
Entpd5	1131.84	0.413632	0.051997	7.95492	1.79244e-15	1.20669e-12
Snx15	1092.25	0.33643	0.0437315	7.69309	1.4362e-14	9.20695e-12
Stat2	1053.51	0.516454	0.067167	7.68911	1.48159e-14	9.20695e-12
Pak2	1736.19	0.614375	0.0801175	7.66843	1.74108e-14	1.00467e-11
Isoc2a	319.253	0.79115	0.103136	7.6709	1.70793e-14	1.00467e-11
Scd1	2079.14	0.847686	0.110977	7.63842	2.19895e-14	1.22512e-11
Desi2	1358.29	0.620385	0.0813439	7.62669	2.40862e-14	1.2972e-11
Trappc5	1984.77	0.336856	0.0441991	7.62132	2.51102e-14	1.30873e-11
Fam102a	1003.99	-0.699018	0.0918315	-7.61196	2.69971e-14	1.3631e-11
Aldh9a1	1524.91	0.449364	0.0593479	7.5717	3.68383e-14	1.80363e-11
Thap6	130.935	0.749793	0.0991491	7.56228	3.96068e-14	1.88214e-11
Prdm2	2133.96	-0.384654	0.0508988	-7.55724	4.11706e-14	1.90055e-11
CK137956	143.547	-0.648984	0.0864555	-7.50657	6.06977e-14	2.72415e-11
Dcun1d4	2684.81	-0.584839	0.0779568	-7.50209	6.28064e-14	2.7426e-11
Rimbp2	3153.93	-0.392174	0.0523356	-7.49345	6.70875e-14	2.85245e-11
Mfsd14b	969.873	0.371698	0.0498983	7.4491	9.39816e-14	3.89349e-11
Ccdc126	267.036	0.606729	0.0815961	7.43576	1.0397e-13	4.19961e-11
Susd6	1083.51	-0.491193	0.0661486	-7.42559	1.12275e-13	4.42444e-11
Celf5	5955.46	-0.593326	0.0800855	-7.40865	1.27588e-13	4.90818e-11
Pip4k2c	1299.55	-0.32679	0.0442317	-7.38816	1.4888e-13	5.46694e-11
Bcl11b	4342.61	-0.521393	0.0705542	-7.38996	1.46877e-13	5.46694e-11
Has3	996.495	-0.635263	0.0861446	-7.37437	1.65122e-13	5.92863e-11
Cbfb	947.071	-0.986296	0.133933	-7.36409	1.78353e-13	6.26446e-11
Fam162a	3295.69	0.978027	0.13298	7.35472	1.91325e-13	6.57711e-11
Sdccag8	786.382	0.526277	0.0716504	7.34507	2.05657e-13	6.78121e-11
Pdha1	10633.1	0.332714	0.0452908	7.34618	2.03956e-13	6.78121e-11
Fbxo46	527.836	-0.299767	0.0409587	-7.31876	2.50279e-13	8.02886e-11
Kcnh1	1693.55	-0.584139	0.0798323	-7.31708	2.53433e-13	8.02886e-11
Elovl2	1578.91	-0.414333	0.056685	-7.30939	2.68362e-13	8.33832e-11
Isca1	2542.63	-0.38015	0.0520795	-7.29941	2.89042e-13	8.81143e-11
Galnt7	308.265	0.685179	0.0939441	7.29348	3.02048e-13	8.87306e-11
Rsrc1	989.843	0.387898	0.053173	7.29501	2.98635e-13	8.87306e-11
Rab9b	2649.61	-0.473813	0.0650041	-7.28897	3.12338e-13	9.0115e-11
Kyat1	453.835	0.346538	0.0476126	7.27828	3.38093e-13	9.58346e-11
Hikeshi	778.379	0.379947	0.0522312	7.27433	3.48154e-13	9.69849e-11
Lgi1	2085.07	-0.583639	0.0806823	-7.2338	4.69663e-13	1.28616e-10
Akt3	9137.64	0.567233	0.0784687	7.22878	4.87358e-13	1.31237e-10
Nisch	16960.2	-0.32769	0.0459038	-7.13863	9.42653e-13	2.49679e-10
Snrpn	8724.05	0.258422	0.0364793	7.08406	1.39994e-12	3.6482e-10
Nptx1	773.967	-0.823526	0.116443	-7.07233	1.52349e-12	3.90715e-10
Trpm3	1008.87	-0.612562	0.0868513	-7.053	1.75107e-12	4.42062e-10
Aph1a	610.276	0.374691	0.0538136	6.96276	3.33666e-12	8.28936e-10
Tgfbrap1	1902.19	-0.421012	0.0604842	-6.96069	3.38613e-12	8.28936e-10
Plod2	599.343	0.785183	0.113114	6.94152	3.87894e-12	9.35405e-10
Ypel2	699.548	-0.60323	0.0873138	-6.90876	4.88901e-12	1.16164e-09
Grb2	6607.04	-0.335603	0.0486002	-6.90538	5.00707e-12	1.17245e-09
Thrsp	193.256	0.870721	0.126793	6.86728	6.54384e-12	1.51041e-09
Ipo11	2915.54	0.350812	0.0511397	6.85988	6.8919e-12	1.54656e-09
Ipo11-lrrc70	2915.54	0.350812	0.0511397	6.85988	6.8919e-12	1.54656e-09
Ccng1	5631.2	0.777922	0.113647	6.84508	7.64336e-12	1.6917e-09
1810013L24Rik	1959.03	0.394055	0.057589	6.84254	7.78009e-12	1.69869e-09
Camta1	8757.73	-0.420564	0.0620304	-6.77997	1.20197e-11	2.52211e-09
Acad8	527.291	0.763625	0.112629	6.78002	1.20159e-11	2.52211e-09
Hnrnpul1	3564.23	-0.315357	0.0464967	-6.78235	1.18236e-11	2.52211e-09
Mtmr12	374.597	-0.447695	0.0660704	-6.77603	1.23527e-11	2.55875e-09
Glce	934.641	-0.462428	0.0684023	-6.76042	1.37593e-11	2.78499e-09
Zc3h4	2076.61	-0.329475	0.0487382	-6.7601	1.37896e-11	2.78499e-09
Eps15	12217.4	0.40976	0.0606798	6.75282	1.44996e-11	2.89223e-09
Ppm1f	1814.13	-0.4256	0.0633068	-6.72282	1.78235e-11	3.48613e-09
Tmem97	936.228	0.594328	0.0884136	6.72213	1.79086e-11	3.48613e-09
Srf	1237.96	-0.327472	0.048732	-6.71986	1.81901e-11	3.49878e-09
Stag3	277.254	-0.607107	0.0906949	-6.69394	2.17236e-11	4.12928e-09
Zfp334	1258.05	-0.413536	0.0619019	-6.68051	2.38116e-11	4.47353e-09
Map7d1	5213.59	-0.357249	0.0535077	-6.67659	2.44563e-11	4.54184e-09
Prxl2a	2798.43	0.312223	0.0470703	6.63312	3.28666e-11	6.03438e-09
Apc2	15119.2	-0.479922	0.0724912	-6.62042	3.58177e-11	6.43007e-09
Tcta	1070.92	0.303441	0.0458317	6.62076	3.57354e-11	6.43007e-09
Cyb5b	7009.38	-0.459511	0.0694748	-6.61406	3.73923e-11	6.63898e-09
Fkbp14	475.103	0.592666	0.0900129	6.58423	4.57239e-11	8.03e-09
Apln	27.3855	1.51981	0.231368	6.56877	5.07309e-11	8.81354e-09
Ndst1	4848.56	-0.379875	0.0580432	-6.54471	5.96123e-11	1.02463e-08
Manbal	1259.19	0.360644	0.055266	6.5256	6.77281e-11	1.15188e-08
Dyrk1b	391.455	-0.391894	0.0601652	-6.51364	7.3351e-11	1.23151e-08
Tbl2	1556.22	0.741766	0.1139	6.51245	7.39346e-11	1.23151e-08
Btrc	2993.26	-0.215323	0.0331142	-6.50244	7.90292e-11	1.30293e-08
Rab10os	868.272	-0.286428	0.0440861	-6.49702	8.19272e-11	1.33707e-08
Zeb1	691.377	0.525011	0.0811234	6.47175	9.68711e-11	1.56515e-08
Abr	10488.3	-0.613307	0.0948167	-6.46834	9.90846e-11	1.58506e-08
Gapvd1	4095.09	-0.41712	0.0646823	-6.44875	1.12775e-10	1.78637e-08
Stat3	2163.5	0.345884	0.0536579	6.4461	1.14762e-10	1.8002e-08
Arhgef7	9245.28	-0.356085	0.0552822	-6.44123	1.18512e-10	1.84116e-08
Ilrun	5863.92	-0.190845	0.0296432	-6.43806	1.21011e-10	1.86206e-08
Scyl3	583.953	-0.332825	0.0517839	-6.42718	1.29989e-10	1.98135e-08
Blzf1	861.418	0.369635	0.0576825	6.40809	1.47354e-10	2.22505e-08
Ptges3	3896.09	0.370779	0.0581323	6.37819	1.79189e-10	2.68069e-08
Stard4	3815.64	0.569161	0.0893118	6.37274	1.85678e-10	2.70271e-08
Ptpn4	2632.68	0.419232	0.0657737	6.37387	1.84322e-10	2.70271e-08
Bmerb1	8272.13	-0.171289	0.0268689	-6.375	1.82962e-10	2.70271e-08
Yeats4	1337.89	-0.690775	0.108623	-6.3594	2.02541e-10	2.92183e-08
Rnf44	3183.32	-0.668146	0.105096	-6.35749	2.05082e-10	2.93232e-08
Mrpl18	748.178	0.947689	0.149526	6.33797	2.32815e-10	3.29964e-08
Cyb561d1	418.615	-0.381723	0.0602472	-6.33595	2.35889e-10	3.31414e-08
Ugdh	847.619	0.498372	0.0787072	6.33198	2.4204e-10	3.37125e-08
Cntnap4	2736.08	-0.458387	0.0726332	-6.31098	2.77276e-10	3.82901e-08
Paxip1	1111.82	-0.269282	0.0428061	-6.29074	3.15956e-10	4.32618e-08
Ahcyl2	2622.06	0.88443	0.140643	6.28846	3.20639e-10	4.35342e-08
Ikbkg	1818.53	0.30745	0.0489198	6.28477	3.28333e-10	4.42073e-08
Irf6	96.4775	0.588338	0.0936423	6.28282	3.32481e-10	4.43958e-08
C2cd4c	497.853	-0.336186	0.0537848	-6.25056	4.08974e-10	5.40203e-08
Rnf181	2354.21	0.288304	0.0461309	6.2497	4.11246e-10	5.40203e-08
Ttc28	2139.59	-0.667489	0.107291	-6.22128	4.93128e-10	6.37397e-08
Fam210a	1306.1	0.610101	0.0980625	6.22155	4.9227e-10	6.37397e-08
Cd109	88.0579	-0.630183	0.101395	-6.21511	5.12884e-10	6.57672e-08
Nfasc	5870.82	-0.491429	0.0791018	-6.21261	5.21102e-10	6.60527e-08
Rcan3	3848.65	-0.593873	0.0956015	-6.21196	5.23287e-10	6.60527e-08
Mlec	5908.11	0.256674	0.0414069	6.19883	5.68832e-10	7.12451e-08
Rrm1	696.406	-0.480081	0.077469	-6.19707	5.75231e-10	7.14924e-08
Marchf4	2793.13	-0.315736	0.0509838	-6.19286	5.90804e-10	7.2621e-08
Mbtps2	2163.69	0.581778	0.0939534	6.1922	5.93302e-10	7.2621e-08
Stip1	5436.47	0.179414	0.0290826	6.16911	6.86761e-10	8.34286e-08
Actn4	3777.41	-0.395604	0.0642249	-6.15966	7.29026e-10	8.7902e-08
Tnfrsf22	60.8466	0.880783	0.143304	6.14625	7.93387e-10	9.42555e-08
Zfand2a	2829.69	-0.309636	0.0503723	-6.14695	7.89863e-10	9.42555e-08
Trappc14	3709.01	-0.573542	0.0934678	-6.13625	8.44911e-10	9.96439e-08
Dnajc17	274.364	0.47509	0.0775431	6.12678	8.96742e-10	1.0499e-07
Osbpl5	1393.49	-0.311044	0.0508577	-6.11596	9.5978e-10	1.11562e-07
Tspan14	2105.73	-0.4944	0.0808815	-6.11264	9.7996e-10	1.13094e-07
Dhcr7	4362.39	0.414652	0.0680637	6.09212	1.11423e-09	1.27678e-07
Slc9a3r1	146.36	1.10128	0.1812	6.07773	1.21892e-09	1.38691e-07
Tspan5	4716.84	-0.292283	0.0481213	-6.07388	1.24859e-09	1.41074e-07
Map2k7	1089.37	-0.407241	0.0671009	-6.06909	1.28635e-09	1.4433e-07
Morn2	340.389	0.446651	0.0736695	6.0629	1.3369e-09	1.48967e-07
Cct7	10496.8	0.207151	0.0341861	6.05952	1.36529e-09	1.51089e-07
Rimbp3	76.999	-0.654173	0.108045	-6.05463	1.40742e-09	1.54691e-07
Hmg20a	3165.09	0.319443	0.0528539	6.04389	1.50441e-09	1.64235e-07
Zfp952	770.33	0.26191	0.0433565	6.04086	1.53299e-09	1.66232e-07
Mettl9	2461.81	0.455006	0.0755808	6.02013	1.74277e-09	1.8772e-07
Rps8	8057.97	0.342985	0.057216	5.99457	2.04023e-09	2.16869e-07
Gm15501	8057.97	0.342985	0.057216	5.99457	2.04023e-09	2.16869e-07
Pml	172.179	-0.541936	0.0904517	-5.99144	2.07994e-09	2.19644e-07
Gopc	2703.81	0.349682	0.0585601	5.97133	2.35328e-09	2.46896e-07
Polr3g	231.779	1.44005	0.24139	5.96564	2.43672e-09	2.54001e-07
Megf6	279.601	-0.891468	0.14948	-5.96379	2.46449e-09	2.55249e-07
Flna	8449.94	-0.40266	0.0675582	-5.96019	2.5195e-09	2.59284e-07
Srsf12	1237.72	-0.338333	0.0568305	-5.95338	2.62668e-09	2.68603e-07
Ndrg4	44509.5	-0.21788	0.0366888	-5.93858	2.87498e-09	2.92145e-07
Klhl28	671.034	0.523811	0.088311	5.93144	3.00289e-09	2.9977e-07
Trio	8003.62	-0.450328	0.0759231	-5.93136	3.00429e-09	2.9977e-07
Rbm5	4910.79	-0.146472	0.0246948	-5.93129	3.00568e-09	2.9977e-07
Sh3bp4	642.503	-0.337269	0.056902	-5.92719	3.08167e-09	3.05463e-07
Ldha	50718.4	0.672133	0.11353	5.92033	3.21287e-09	3.16527e-07
Vps4b	1522.34	-0.256727	0.0434089	-5.91415	3.33602e-09	3.26667e-07
Crot	1141.46	0.897984	0.152232	5.89881	3.66144e-09	3.56372e-07
Ldlrad4	629.52	-0.413509	0.070162	-5.89362	3.77817e-09	3.61841e-07
Grip2	1257.64	-0.330773	0.0561256	-5.89345	3.78222e-09	3.61841e-07
Qars	2287.4	0.227671	0.038632	5.89333	3.78481e-09	3.61841e-07
Bach1	1632.19	-0.456938	0.0775841	-5.88958	3.87185e-09	3.67985e-07
Relch	3472.49	-0.284162	0.0484924	-5.85992	4.63078e-09	4.37541e-07
2210016F16Rik	201.639	0.666457	0.113808	5.85598	4.74218e-09	4.43646e-07
Rabgap1	4737.06	-0.136693	0.0233437	-5.85569	4.75031e-09	4.43646e-07
Efr3a	1813.91	0.364025	0.0621797	5.85441	4.78704e-09	4.44342e-07
Plekhg2	220.588	-0.725738	0.123983	-5.85352	4.81276e-09	4.44342e-07
Oxnad1	676.879	0.265526	0.0454	5.84858	4.95783e-09	4.54163e-07
Washc1	1556.81	0.284317	0.0486179	5.84799	4.97535e-09	4.54163e-07
Rap1gap2	3530.67	-0.378972	0.064966	-5.8334	5.43088e-09	4.92959e-07
Spidr	205.84	0.947979	0.162994	5.81605	6.02538e-09	5.43867e-07
Glt1d1	823.57	0.6113	0.105179	5.812	6.17305e-09	5.541e-07
Cand2	242.664	0.563174	0.0972396	5.79161	6.97143e-09	6.22306e-07
Unc79	1488.37	-0.291758	0.0504289	-5.78553	7.22842e-09	6.41701e-07
Med24	2319.09	-0.235081	0.0406515	-5.78284	7.34518e-09	6.48503e-07
Chrna7	1039.15	-0.705873	0.122165	-5.77802	7.55845e-09	6.63706e-07
Ipo9	4978.66	-0.214016	0.0370515	-5.77616	7.64258e-09	6.67466e-07
Fh1	4343.41	0.410389	0.071072	5.77427	7.72881e-09	6.71367e-07
Sdcbp	5356.53	0.645638	0.111838	5.77297	7.7885e-09	6.72934e-07
Mrpl24	698.963	0.285095	0.0494025	5.77085	7.88704e-09	6.74706e-07
Fyn	5889.06	-0.263712	0.0456981	-5.77074	7.89252e-09	6.74706e-07
Slc9a6	5882.14	0.243525	0.0422224	5.76767	8.03735e-09	6.83471e-07
Ndufb9	4599.34	0.454612	0.078894	5.76232	8.2965e-09	7.01815e-07
Afg1l	544.383	0.47323	0.0822324	5.75479	8.67483e-09	7.29996e-07
Pals2	1576.69	0.335721	0.0584319	5.74551	9.16418e-09	7.6718e-07
Prkce	10025.9	-0.35764	0.0623449	-5.73648	9.66627e-09	8.05041e-07
Avpi1	478.74	0.601234	0.104882	5.73248	9.8971e-09	8.20038e-07
Pianp	1865.01	-0.390642	0.0681907	-5.72867	1.01224e-08	8.34427e-07
Chst11	2130.49	-0.570358	0.0996704	-5.72244	1.05006e-08	8.60137e-07
Foxred1	1281.32	0.276392	0.0483052	5.72179	1.05408e-08	8.60137e-07
Parm1	1273.52	-0.622095	0.108774	-5.71915	1.0706e-08	8.69232e-07
Tbrg1	1899.53	0.439302	0.0768501	5.71635	1.08837e-08	8.74868e-07
Sema4c	1192.54	-0.299429	0.0523809	-5.71638	1.08818e-08	8.74868e-07
Bicra	623.124	-0.405772	0.071021	-5.7134	1.10738e-08	8.85738e-07
Laptm4a	4581.51	-0.355383	0.0622144	-5.71222	1.11509e-08	8.87515e-07
Fam78a	40.5822	1.43853	0.252088	5.70645	1.15358e-08	9.13646e-07
Fam222a	354.747	-0.808339	0.141758	-5.70224	1.18242e-08	9.31917e-07
Doc2b	1557.24	-0.644761	0.113447	-5.68338	1.3206e-08	1.03077e-06
Gpr155	1094.32	-0.394827	0.0694632	-5.68397	1.31604e-08	1.03077e-06
Nelfa	637.81	-0.281783	0.049591	-5.68214	1.33023e-08	1.03329e-06
Adcy6	1388.7	-0.385282	0.067831	-5.68002	1.34678e-08	1.03863e-06
Skp2	221.775	-0.370901	0.0653132	-5.67881	1.35638e-08	1.03863e-06
H4c9	36.9123	-0.857279	0.150942	-5.67953	1.35065e-08	1.03863e-06
Fam171a2	4750.45	-0.278075	0.0489768	-5.67769	1.36526e-08	1.0405e-06
Ube2o	7613.25	-0.25794	0.0454776	-5.67182	1.41292e-08	1.06795e-06
Frmd4a	5167.44	-0.338395	0.0596645	-5.67162	1.41451e-08	1.06795e-06
Eif4g2	50899.6	-0.249656	0.0441187	-5.65873	1.525e-08	1.14334e-06
Isoc1	2035.76	0.422385	0.0746484	5.65833	1.5285e-08	1.14334e-06
Fdps	871.682	0.434725	0.0768748	5.65497	1.55872e-08	1.16057e-06
Daam1	5575.8	-0.325582	0.0575915	-5.6533	1.57398e-08	1.16655e-06
Dlat	3902.93	0.264854	0.0468763	5.65006	1.60396e-08	1.18009e-06
Mxd1	604.911	-0.442466	0.0783161	-5.64975	1.60685e-08	1.18009e-06
Akap11	9995.56	-0.239884	0.0425505	-5.63763	1.72403e-08	1.25904e-06
Ppm1h	5901.13	-0.387588	0.0687573	-5.63704	1.72995e-08	1.25904e-06
Btbd6	1204.6	-0.416159	0.0739346	-5.62874	1.81532e-08	1.31525e-06
Gm11992	11.1154	1.38923	0.247234	5.61909	1.91967e-08	1.38465e-06
Wdr47	7244.4	-0.342142	0.0609215	-5.61612	1.95294e-08	1.39618e-06
Akap9	7751.24	-0.364237	0.0648503	-5.61659	1.94764e-08	1.39618e-06
Tbck	1677.38	-0.298992	0.0533146	-5.60807	2.04599e-08	1.45626e-06
Natd1	562.729	-0.868268	0.154946	-5.60368	2.09847e-08	1.48706e-06
Soat1	920.757	0.763493	0.136381	5.59825	2.16525e-08	1.51703e-06
Slc22a15	328.398	-0.268049	0.0478771	-5.59868	2.1599e-08	1.51703e-06
Rpl22l1	1253.71	0.636638	0.113742	5.59721	2.17831e-08	1.51703e-06
Mical3	2985.95	-0.370832	0.0662486	-5.59758	2.1737e-08	1.51703e-06
Vav2	1625.18	-0.470623	0.0840971	-5.59618	2.19123e-08	1.51947e-06
Sp1	836.238	-0.195217	0.0349126	-5.5916	2.24992e-08	1.54689e-06
Gfer	518.999	0.271145	0.0484899	5.59178	2.24748e-08	1.54689e-06
Taok3	1994.27	-0.480096	0.0858932	-5.58945	2.27789e-08	1.55949e-06
Tex264	2533.09	0.258019	0.0461757	5.58777	2.30003e-08	1.56274e-06
Pyurf	245.391	0.399744	0.071541	5.58762	2.30198e-08	1.56274e-06
Pak1ip1	1263	0.29467	0.0527497	5.58619	2.321e-08	1.56905e-06
Pinx1	195.36	0.429819	0.0769611	5.58489	2.33842e-08	1.57424e-06
Hspa8	56768.8	0.234566	0.0420398	5.57962	2.41039e-08	1.61596e-06
Rdh11	2976.69	0.410375	0.0736342	5.57316	2.50157e-08	1.67016e-06
Ptpn14	90.0021	-0.766906	0.137663	-5.5709	2.53426e-08	1.68502e-06
Synpo	812.839	-0.548916	0.0985809	-5.56818	2.57417e-08	1.70454e-06
Atp5k	3350.8	0.365954	0.0658062	5.56109	2.681e-08	1.76804e-06
Cycs	4066.95	0.407116	0.0733041	5.55379	2.79539e-08	1.83598e-06
Ahdc1	1451.23	-0.386233	0.0695894	-5.55017	2.8539e-08	1.86682e-06
Map1lc3b	6037.02	-0.332408	0.0599465	-5.54507	2.93838e-08	1.91433e-06
Myc	671.961	-0.408736	0.0737691	-5.54075	3.01174e-08	1.95424e-06
Sec23b	1624.7	0.46553	0.0840718	5.53729	3.07193e-08	1.98533e-06
Tmem45a	44.1066	0.987126	0.178316	5.53582	3.09779e-08	1.99407e-06
Dmac2	894.023	0.393021	0.0711046	5.52736	3.2509e-08	2.08432e-06
Pgp	709.885	0.542328	0.0982666	5.51894	3.41047e-08	2.17798e-06
Ints7	1071.1	-0.292634	0.0530616	-5.51499	3.48804e-08	2.21875e-06
Itga6	397.32	-0.49803	0.0904717	-5.50482	3.69551e-08	2.32328e-06
Mosmo	1752.07	0.276872	0.0502949	5.50497	3.69226e-08	2.32328e-06
Ezr	449.331	0.575381	0.104509	5.50558	3.67954e-08	2.32328e-06
Dclk2	4592.6	-0.279382	0.0507963	-5.50004	3.797e-08	2.37783e-06
Plxna1	8249.48	-0.4369	0.0795309	-5.49347	3.94123e-08	2.45863e-06
Rnf165	4081.91	-0.479591	0.0873435	-5.49086	3.99979e-08	2.48556e-06
Dcp2	2427.64	0.480902	0.0876444	5.48697	4.08891e-08	2.53121e-06
Mipol1	84.4836	0.588789	0.107346	5.48497	4.13529e-08	2.55015e-06
Cdh24	357.768	-0.484639	0.0884026	-5.48218	4.20127e-08	2.58098e-06
Smcr8	1617.39	-0.392885	0.0716939	-5.48004	4.25233e-08	2.60246e-06
Cisd1	2943.8	0.229061	0.0418312	5.47584	4.35441e-08	2.65488e-06
Angptl2	43.7951	-1.18247	0.21625	-5.46806	4.54988e-08	2.76362e-06
Acvr1b	4525.2	-0.252111	0.0461286	-5.46538	4.61904e-08	2.79512e-06
Rhob	5132.39	-0.408375	0.0748003	-5.45954	4.77377e-08	2.87798e-06
Specc1l	2590.21	-0.210363	0.038543	-5.45787	4.8188e-08	2.89432e-06
Ubap2	2837.91	-0.351375	0.0644012	-5.45603	4.86907e-08	2.90294e-06
Ndufb11	3004.1	0.380025	0.0696481	5.45635	4.86019e-08	2.90294e-06
Entpd1	69.8432	-0.676033	0.123969	-5.45325	4.94582e-08	2.93785e-06
Pitpnm2	5974.84	-0.368385	0.0676151	-5.44826	5.08645e-08	3.01032e-06
Nlrp6	41.8745	-1.01987	0.187422	-5.44156	5.28155e-08	3.11438e-06
Gabpb1	556.076	-0.333023	0.0614144	-5.42255	5.87564e-08	3.4521e-06
Pik3r3	2861.13	-0.55882	0.103144	-5.41788	6.03112e-08	3.53061e-06
Wdsub1	116.073	0.454961	0.0840567	5.41255	6.21329e-08	3.62412e-06
Acbd6	1588.36	0.246842	0.0456151	5.41142	6.25276e-08	3.63402e-06
Srgap3	13919.8	-0.274142	0.050672	-5.41012	6.29811e-08	3.64726e-06
Faxc	3803.77	-0.306709	0.0567006	-5.40926	6.32841e-08	3.65172e-06
Ankib1	2888.45	-0.333679	0.0617231	-5.40606	6.44245e-08	3.70429e-06
Pkm	40393.1	0.493399	0.0913467	5.40138	6.61299e-08	3.78887e-06
Nadk	1780.27	-0.311355	0.0576655	-5.39933	6.68914e-08	3.81895e-06
Taco1	540.07	0.23058	0.0427667	5.39157	6.98456e-08	3.97358e-06
Pde10a	5193	-0.338661	0.0628719	-5.38652	7.18335e-08	4.07233e-06
Mdh2	9967.99	0.601063	0.111622	5.3848	7.25264e-08	4.09723e-06
Acaa1a	1523.18	0.336353	0.0624832	5.3831	7.32143e-08	4.12168e-06
Rab7	8004.54	-0.243756	0.0452875	-5.3824	7.34997e-08	4.12338e-06
Brd2	9402.31	-0.315798	0.0587077	-5.37917	7.48318e-08	4.16916e-06
Hook3	3126.2	-0.315795	0.058701	-5.37973	7.45991e-08	4.16916e-06
Etfa	846.781	0.590093	0.110005	5.36424	8.12892e-08	4.48256e-06
Pgap3	292.735	-0.845172	0.157543	-5.3647	8.10836e-08	4.48256e-06
Fgl2	137.689	-0.870146	0.162201	-5.36462	8.11213e-08	4.48256e-06
Slc39a5	28.2381	0.660257	0.123341	5.35311	8.64561e-08	4.75126e-06
Tkfc	680.025	0.19743	0.0369019	5.35014	8.78881e-08	4.81359e-06
Ctnnd1	567.954	-0.465967	0.0871673	-5.34566	9.00861e-08	4.9173e-06
Diaph1	1440.7	-0.378432	0.0708043	-5.34476	9.05346e-08	4.92514e-06
Thbd	31.4014	-1.0632	0.199029	-5.34194	9.1959e-08	4.98584e-06
Lbhd1	151.92	-0.642329	0.120281	-5.34025	9.28179e-08	5.01558e-06
Brinp2	3543.65	-0.34187	0.064064	-5.33638	9.48181e-08	5.10659e-06
Phaf1	772.866	-0.288612	0.0541322	-5.33161	9.73436e-08	5.22519e-06
Casp2	605.431	-0.426485	0.0800122	-5.33026	9.80737e-08	5.24694e-06
Plekhf2	138.035	0.412467	0.0774267	5.3272	9.97389e-08	5.31842e-06
Tedc1	81.4824	-0.656512	0.123272	-5.32574	1.00545e-07	5.33009e-06
Eef1g	6590.54	0.302611	0.0568219	5.32561	1.00617e-07	5.33009e-06
Capza1	1625.68	0.35817	0.0672701	5.32435	1.01313e-07	5.3494e-06
Ccdc91	1517.5	0.429305	0.0806415	5.32363	1.01718e-07	5.35328e-06
Rims3	3614.03	-0.208502	0.0391943	-5.3197	1.0394e-07	5.45249e-06
Zfp346	1667.99	-0.415568	0.0781892	-5.3149	1.06717e-07	5.56203e-06
Rpl4	20294.9	0.240609	0.0452688	5.31512	1.06588e-07	5.56203e-06
Pcdhgb5	245.484	-0.596757	0.112358	-5.31122	1.08894e-07	5.65722e-06
Panx1	2867.94	-0.167198	0.0314883	-5.30983	1.09725e-07	5.664e-06
Kars	3058.83	0.382459	0.0720256	5.31004	1.096e-07	5.664e-06
Usp20	4328.88	-0.301636	0.0568944	-5.30168	1.14744e-07	5.90418e-06
Nrbf2	357.623	0.465106	0.0877599	5.29976	1.15958e-07	5.9477e-06
Fam131a	4462.12	-0.288678	0.0545	-5.29684	1.17822e-07	6.0242e-06
Tbc1d14	4418.77	-0.289004	0.0546323	-5.28997	1.22334e-07	6.23515e-06
Rab6b	35540.9	-0.51872	0.0981092	-5.28717	1.24223e-07	6.29174e-06
Gabrb3	12692.4	-0.363061	0.0686622	-5.28764	1.23903e-07	6.29174e-06
Ap1m1	3380.87	-0.317739	0.0601648	-5.28114	1.28381e-07	6.48203e-06
Csnk1e	6283.42	-0.43412	0.0822363	-5.27893	1.2994e-07	6.54032e-06
Lrrc28	841.267	-0.523911	0.099321	-5.27493	1.32809e-07	6.64333e-06
2500002B13Rik	145.144	0.733199	0.138986	5.27534	1.32508e-07	6.64333e-06
Zfyve21	106.447	0.488281	0.092583	5.27398	1.33493e-07	6.65693e-06
H2-K1	1805.98	1.25247	0.237841	5.26599	1.39436e-07	6.93188e-06
Cxxc1	1291.97	-0.194427	0.0370043	-5.25418	1.48689e-07	7.3467e-06
Ssr3	5748.21	0.281009	0.0534803	5.25444	1.48479e-07	7.3467e-06
Nubpl	300.425	0.417174	0.0794157	5.25304	1.49607e-07	7.36951e-06
Nup155	1178.75	-0.294018	0.0559843	-5.2518	1.50623e-07	7.37461e-06
Nyap1	6665.1	-0.393879	0.0749952	-5.25205	1.50412e-07	7.37461e-06
Tbc1d1	819.796	0.529493	0.100949	5.24516	1.5615e-07	7.6221e-06
Ldb1	3026.54	-0.245024	0.0468163	-5.23373	1.66119e-07	8.08429e-06
Abcd4	242.776	0.304851	0.0582544	5.23309	1.66697e-07	8.08805e-06
Ripply2	74.0388	0.600745	0.114809	5.23254	1.67199e-07	8.08812e-06
Serf2	1513.79	0.436058	0.0833682	5.23051	1.69041e-07	8.15284e-06
Axin1	1148.55	-0.158263	0.0302621	-5.22973	1.6976e-07	8.16313e-06
Slc37a3	2600.52	-0.327307	0.0626764	-5.22217	1.76838e-07	8.47825e-06
Gm17396	94.6149	-0.795017	0.152257	-5.22154	1.77443e-07	8.48208e-06
Fmn2	2512.3	-0.378253	0.0724502	-5.22087	1.78086e-07	8.48772e-06
Ehbp1	2757.18	-0.25701	0.0492481	-5.21866	1.80219e-07	8.5641e-06
Pdxdc1	2600.82	0.274533	0.0526305	5.21622	1.8261e-07	8.6523e-06
Nsun2	2729.24	0.284136	0.054489	5.21456	1.84251e-07	8.70452e-06
Gk5	330.351	0.713653	0.1369	5.21295	1.8586e-07	8.75495e-06
Nrp1	1694.66	0.402442	0.077228	5.21109	1.87736e-07	8.81759e-06
Nfyc	626.884	-0.376864	0.0723469	-5.20913	1.8973e-07	8.88541e-06
Rab11b	3752.41	-0.350226	0.0672864	-5.20501	1.93984e-07	9.05837e-06
Mvb12b	6013.01	-0.341673	0.0656784	-5.20221	1.9693e-07	9.14308e-06
Lrch1	430.405	-0.301679	0.057985	-5.20271	1.96405e-07	9.14308e-06
Cyc1	7037.73	0.38146	0.0733469	5.20076	1.98475e-07	9.18841e-06
Ncoa4	1272.15	-0.575558	0.110812	-5.19399	2.05837e-07	9.50201e-06
Poldip2	2646.13	0.292141	0.0562912	5.18982	2.10497e-07	9.66193e-06
Sirt5	360.843	0.306096	0.058975	5.19027	2.09988e-07	9.66193e-06
Ccdc58	444.723	0.504043	0.0971317	5.18928	2.11109e-07	9.66258e-06
Sirt3	1061.47	0.311066	0.0599666	5.18732	2.13341e-07	9.6928e-06
Arhgap5	3643.36	0.323337	0.0623345	5.18712	2.13569e-07	9.6928e-06
Rbpj	504.732	-0.582416	0.112262	-5.18802	2.12536e-07	9.6928e-06
Npl	127.586	0.997975	0.192597	5.18167	2.19909e-07	9.95259e-06
Csf2ra	517.671	-0.321104	0.0619797	-5.1808	2.20939e-07	9.97127e-06
Tmod2	20635.3	0.451975	0.0872798	5.17846	2.23726e-07	1.00689e-05
Mvd	3461.12	0.548953	0.106054	5.17615	2.26512e-07	1.0166e-05
Hmgxb4	958.425	0.36908	0.0713156	5.1753	2.27548e-07	1.01842e-05
Ptpn9	1684.01	-0.278568	0.0538983	-5.16841	2.36098e-07	1.05377e-05
Elavl4	4154.46	-0.404562	0.0782928	-5.1673	2.37502e-07	1.05711e-05
Mdm2	1067.03	-0.210904	0.0408347	-5.16483	2.40659e-07	1.06822e-05
9930021J03Rik	1904.85	-0.523144	0.101388	-5.15981	2.47205e-07	1.09128e-05
Gapdh	46951.9	0.567032	0.109889	5.16002	2.46925e-07	1.09128e-05
Hacl1	106.774	0.612584	0.118744	5.15887	2.48447e-07	1.09378e-05
S100pbp	1299.37	0.544398	0.105596	5.15546	2.53013e-07	1.11085e-05
Lrrc7	2129.85	-0.475961	0.0923378	-5.15456	2.54226e-07	1.11315e-05
Mxd4	1914.96	-0.464375	0.0901191	-5.1529	2.56487e-07	1.12002e-05
Adat2	180.401	0.590202	0.114671	5.1469	2.64821e-07	1.15329e-05
Bnip3	6612.9	0.800543	0.155598	5.14494	2.67607e-07	1.16229e-05
Ccdc117	515.281	-0.395172	0.0768399	-5.1428	2.70677e-07	1.17247e-05
Cyp51	12635.4	0.372475	0.0724494	5.14118	2.73019e-07	1.17946e-05
Grik3	3189.57	-0.286701	0.0558421	-5.13413	2.83453e-07	1.22041e-05
Gse1	494.222	-0.412765	0.080402	-5.13376	2.84009e-07	1.22041e-05
Acly	15826.1	0.270756	0.0527806	5.12983	2.89997e-07	1.24283e-05
Tubb4b	6337.45	0.436811	0.085315	5.11998	3.05573e-07	1.30612e-05
Siae	671.238	-0.29114	0.0569147	-5.11537	3.13127e-07	1.33488e-05
Cops6	3477.85	0.227341	0.0444533	5.11414	3.15166e-07	1.34004e-05
Srprb	1244.82	0.185974	0.0363707	5.11328	3.16613e-07	1.34266e-05
Prkcg	1119.18	-0.754214	0.147628	-5.10888	3.24073e-07	1.37069e-05
Txnl4a	2098.76	-0.201837	0.0395223	-5.10691	3.27464e-07	1.37782e-05
Gm16286	2098.76	-0.201837	0.0395223	-5.10691	3.27464e-07	1.37782e-05
Hcn4	858.394	-0.373858	0.0732437	-5.1043	3.32019e-07	1.39336e-05
Tbc1d22a	706.605	-0.39756	0.0779313	-5.10141	3.37127e-07	1.41113e-05
Bcap29	1072.02	0.412817	0.0809511	5.09959	3.40395e-07	1.42113e-05
Eif3g	2264.57	0.330216	0.0647813	5.0974	3.44349e-07	1.43393e-05
Smarcad1	1608.13	-0.291896	0.0572862	-5.09539	3.48025e-07	1.44551e-05
Rnf130	1192.47	-0.238314	0.046826	-5.08935	3.59284e-07	1.48698e-05
Limk2	7758.09	-0.189718	0.0372795	-5.08906	3.5985e-07	1.48698e-05
Srxn1	1392.25	0.581533	0.114357	5.08522	3.67204e-07	1.5135e-05
Cntfr	1643.09	-0.541528	0.10652	-5.08381	3.69937e-07	1.52089e-05
Net1	418.809	0.514961	0.101393	5.07888	3.79672e-07	1.55e-05
Sema5a	1227.78	-0.506042	0.0996316	-5.07913	3.79166e-07	1.55e-05
Cotl1	5549.13	-0.338265	0.0666039	-5.07876	3.79898e-07	1.55e-05
Pdk1	7000.01	0.502117	0.0989367	5.07513	3.87225e-07	1.57196e-05
Pbx1	9800.75	-0.433748	0.085464	-5.0752	3.87079e-07	1.57196e-05
Gss	337.479	0.349869	0.0689788	5.07213	3.93391e-07	1.59299e-05
Rps3a1	8698.39	0.419838	0.0827899	5.07113	3.95467e-07	1.59739e-05
Spats2	1391.34	0.364839	0.0719658	5.06961	3.98624e-07	1.60613e-05
Slc39a10	3641.71	-0.377887	0.0745723	-5.06739	4.03314e-07	1.62098e-05
Psme2	1323.3	0.377457	0.074522	5.06504	4.08311e-07	1.63699e-05
Ndufb10	2852	0.299239	0.059092	5.06395	4.10654e-07	1.64231e-05
Gm35315	96.9432	0.642759	0.127007	5.06081	4.17486e-07	1.66551e-05
Gm16701	39.4027	-0.938766	0.185559	-5.05914	4.21155e-07	1.67601e-05
Fn3krp	573.187	0.535869	0.105944	5.05803	4.23605e-07	1.68162e-05
Tmub2	2567.01	-0.255257	0.0504725	-5.05735	4.25123e-07	1.68351e-05
Homer3	212.085	-0.435127	0.0860646	-5.05582	4.28551e-07	1.6847e-05
Klhl2	4932.62	-0.238719	0.0472115	-5.05638	4.27283e-07	1.6847e-05
Foxo1	583.345	-0.885804	0.175199	-5.05598	4.28187e-07	1.6847e-05
Trim26	899.183	0.488453	0.096625	5.05514	4.30077e-07	1.68659e-05
Tufm	1671.43	0.3874	0.0766558	5.05376	4.33195e-07	1.6947e-05
Apex2	270.366	-0.335038	0.0663098	-5.05262	4.35801e-07	1.70078e-05
9230114K14Rik	134.08	-0.593	0.117393	-5.05142	4.38541e-07	1.70735e-05
Tmem218	407.455	0.429016	0.0849455	5.05049	4.40687e-07	1.71158e-05
Xpnpep1	2747.08	0.250442	0.0495926	5.04998	4.4186e-07	1.71202e-05
Lekr1	189.712	0.369655	0.0732668	5.04533	4.52732e-07	1.74995e-05
1810055G02Rik	890.768	-0.492436	0.0978437	-5.03288	4.83153e-07	1.86308e-05
Ndufb8	3471.21	0.354934	0.0705563	5.03051	4.89183e-07	1.88184e-05
Nop16	1262.16	0.396331	0.0788479	5.02652	4.99462e-07	1.91331e-05
Dhodh	621.022	0.531431	0.105728	5.02642	4.99731e-07	1.91331e-05
Ly6g6e	18.2743	-1.18891	0.236702	-5.02283	5.09147e-07	1.94475e-05
Shank2	4554.45	-0.442951	0.0881988	-5.02219	5.10859e-07	1.94669e-05
Ccnd3	464.836	-0.803574	0.16002	-5.02171	5.12135e-07	1.94696e-05
Ptk2	2750.85	-0.277532	0.0553615	-5.01308	5.3566e-07	2.03161e-05
Canx	14419.7	0.349836	0.0698111	5.01119	5.40946e-07	2.04686e-05
Chst12	353.983	-0.319145	0.0637149	-5.00895	5.4729e-07	2.06602e-05
Kalrn	5499.6	-0.483244	0.0964866	-5.00841	5.48821e-07	2.06697e-05
Cavin2	67.9247	0.782434	0.156252	5.00753	5.51331e-07	2.07159e-05
Golga7b	4496.48	-0.234485	0.0468381	-5.00629	5.54885e-07	2.08011e-05
Ift22	1268.94	0.242923	0.0485578	5.00277	5.65134e-07	2.11363e-05
Rpl3	11133	0.324324	0.0648605	5.00033	5.72312e-07	2.13553e-05
Ndufs5	1228.35	0.300932	0.0601948	4.99931	5.75362e-07	2.14196e-05
Sec61b	1240.34	0.377528	0.0755322	4.99824	5.78547e-07	2.14887e-05
Dcakd	2868.27	-0.439333	0.0880161	-4.9915	5.99109e-07	2.22014e-05
Apbb2	1630.39	-0.309571	0.0620708	-4.98739	6.12012e-07	2.26277e-05
Gnaz	4061.48	-0.191112	0.0383367	-4.98511	6.19278e-07	2.2844e-05
Anks1	1799.36	-0.390559	0.0784057	-4.98125	6.31738e-07	2.31977e-05
Rfx1	494.9	-0.462504	0.0928473	-4.98134	6.31454e-07	2.31977e-05
Lap3	1125.37	0.395851	0.0795428	4.97657	6.47196e-07	2.36578e-05
Arf1	13596.5	-0.14601	0.029339	-4.97664	6.46984e-07	2.36578e-05
Rhoq	928.404	0.59103	0.118794	4.97524	6.51659e-07	2.37228e-05
Vps13c	1715.01	-0.335928	0.0675209	-4.97517	6.5191e-07	2.37228e-05
Nxpe3	277.422	-0.441683	0.0888011	-4.97385	6.5637e-07	2.38314e-05
Rps13	3091.79	0.266876	0.0536749	4.97209	6.6235e-07	2.39946e-05
Nxph3	449.166	-0.580448	0.116911	-4.96488	6.87439e-07	2.48478e-05
Sh2d4b	50.3786	-0.746919	0.150494	-4.96311	6.93746e-07	2.4964e-05
Bahcc1	1312.66	-0.33636	0.0677693	-4.96331	6.93031e-07	2.4964e-05
Gcat	572.316	0.541192	0.109054	4.9626	6.95549e-07	2.49733e-05
Por	2595.93	0.186722	0.0376772	4.95584	7.20192e-07	2.58007e-05
Gm4925	6.83407	-1.76213	0.355625	-4.95503	7.23174e-07	2.58503e-05
Max	1380.28	-0.306045	0.0617783	-4.95393	7.27304e-07	2.59405e-05
Dynlt2b	619.998	0.440877	0.0890446	4.95119	7.37616e-07	2.61927e-05
Ankrd49	358.003	-0.325429	0.0657227	4.95154	7.36282e-07	2.61927e-05
Dap3	3051.23	0.179448	0.0362517	4.95004	7.41969e-07	2.62319e-05
Psme3	3640.94	0.397576	0.0803146	4.95023	7.41272e-07	2.62319e-05
Xkr7	345.675	-0.334013	0.067488	-4.94923	7.4509e-07	2.62848e-05
Ngdn	736.995	0.422439	0.0853825	4.94761	7.51318e-07	2.6393e-05
Arhgap33	10631.3	-0.363665	0.07351	-4.94716	7.53058e-07	2.6393e-05
Tmem202	30.6597	-1.27737	0.258193	-4.94734	7.52339e-07	2.6393e-05
St3gal2	2733.79	-0.258705	0.0523249	-4.9442	7.64569e-07	2.67384e-05
Ero1a	1241.05	0.811855	0.164525	4.93454	8.03412e-07	2.80361e-05
Heca	1317.4	-0.31921	0.0648421	-4.92287	8.52823e-07	2.96963e-05
Fbxl12	228.435	0.265605	0.053967	4.92161	8.5834e-07	2.98241e-05
Sap30	300.579	0.866693	0.176239	4.91773	8.75558e-07	3.03571e-05
Glb1l2	29.5939	0.834341	0.169717	4.91607	8.83003e-07	3.05496e-05
Tmem199	1408.45	0.274574	0.0558806	4.91359	8.94232e-07	3.0872e-05
Srd5a1	936.29	0.263377	0.0536405	4.91005	9.1054e-07	3.1368e-05
Ccnt1	1759.82	-0.304695	0.0621813	-4.90011	9.57844e-07	3.28575e-05
Carns1	133.069	-0.500478	0.102135	-4.90014	9.57674e-07	3.28575e-05
Hcn2	2515.97	0.520908	0.106323	4.8993	9.61798e-07	3.29232e-05
Maoa	2012.67	0.418286	0.0854093	4.89743	9.70991e-07	3.31676e-05
Srek1ip1	455.579	0.556664	0.113678	4.89686	9.73795e-07	3.31933e-05
Tmem39b	277.442	-0.301411	0.0615598	-4.89623	9.7693e-07	3.323e-05
Top1mt	503.556	0.516223	0.105469	4.89454	9.85354e-07	3.34461e-05
Zcchc14	4339.43	-0.3423	0.0699554	-4.89312	9.92494e-07	3.36179e-05
Nudt22	140.551	0.525743	0.107478	4.89163	1.00004e-06	3.38026e-05
Anxa3	107.044	-0.641892	0.131267	-4.88999	1.00841e-06	3.40142e-05
Yars	7164.11	0.199206	0.0407596	4.88734	1.0221e-06	3.44042e-05
Poc1b	193.539	-0.493693	0.101053	-4.88548	1.03177e-06	3.46575e-05
Fam184b	801.86	0.827747	0.169482	4.88398	1.03963e-06	3.46996e-05
Pgam5	934.538	0.294608	0.0603139	4.88458	1.03648e-06	3.46996e-05
Msra	937.322	-0.347067	0.0710612	-4.88405	1.03927e-06	3.46996e-05
Nbdy	840.528	-0.328476	0.0672609	4.88361	1.04161e-06	3.46996e-05
Samd4	1030.79	-0.536827	0.109948	-4.88255	1.04722e-06	3.47863e-05
Nynrin	576.964	-0.375346	0.0768789	-4.88231	1.04852e-06	3.47863e-05
Mdp1	1464.83	0.211387	0.043316	4.88012	1.06021e-06	3.5102e-05
Jmjd6	1618.81	0.5091	0.10437	4.87784	1.07251e-06	3.54368e-05
Rapgef5	1689.95	-0.359831	0.0739465	-4.8661	1.1382e-06	3.75304e-05
Flad1	825.301	0.199651	0.0410323	4.86569	1.14059e-06	3.75325e-05
Ufl1	1362	0.249009	0.0512146	4.86206	1.16169e-06	3.81493e-05
Rps27	4429.12	0.436755	0.0898841	4.85909	1.17928e-06	3.85701e-05
Smim17	588.998	0.774092	0.159298	4.85941	1.17738e-06	3.85701e-05
Dad1	1858.8	0.179467	0.036973	4.854	1.20997e-06	3.94939e-05
Mkrn2	1592.69	0.24338	0.0501638	4.8517	1.22408e-06	3.9874e-05
Sra1	2622.22	0.219955	0.0453444	4.85076	1.2299e-06	3.99828e-05
Suclg1	2275.15	0.326252	0.067269	4.84997	1.23483e-06	4.00625e-05
Prkn	152.366	-0.572279	0.11807	4.84692	1.2539e-06	4.03829e-05
Kdm8	94.7159	-1.01211	0.208818	-4.84686	1.2543e-06	4.03829e-05
Col4a2	1491.75	-0.332909	0.0686826	-4.84707	1.253e-06	4.03829e-05
Vps37c	869.931	0.49973	0.103105	4.8468	1.2547e-06	4.03829e-05
H2-T-ps	69.7278	1.21353	0.250672	4.84112	1.29108e-06	4.14044e-05
Kiz	351.902	0.633303	0.130819	4.84105	1.29156e-06	4.14044e-05
Akip1	190.992	0.732388	0.151302	4.84059	1.29455e-06	4.14178e-05
Guk1	3804.54	0.347142	0.0717721	4.83673	1.31991e-06	4.21458e-05
Ccser1	488.343	0.275828	0.0570343	4.83618	1.3236e-06	4.21802e-05
Jup	1478.91	-0.547748	0.113285	-4.83513	1.33058e-06	4.23194e-05
Prr36	1938.18	-0.336996	0.0697371	-4.83238	1.34909e-06	4.28237e-05
Fkbp11	43.6575	0.639923	0.132458	4.83112	1.35765e-06	4.30109e-05
Slc23a2	2890.11	-0.323507	0.0670004	-4.82843	1.37611e-06	4.33537e-05
Klf8	1035.61	-0.307657	0.0637185	-4.82837	1.37652e-06	4.33537e-05
Hpcal4	6854.5	-0.407198	0.0843291	-4.82868	1.3744e-06	4.33537e-05
Rpl8	9434.85	0.281761	0.0583634	4.8277	1.38122e-06	4.3417e-05
Ube2h	4433.12	-0.304396	0.0631233	-4.82224	1.41955e-06	4.45354e-05
Gmds	552.836	0.492532	0.102146	4.82184	1.42242e-06	4.45388e-05
Gm4202	173.357	-0.34129	0.0707878	-4.82131	1.42621e-06	4.45711e-05
Klhl18	3020.84	-0.221768	0.0460378	-4.81707	1.45679e-06	4.54389e-05
Jak2	1959.97	-0.32038	0.0666048	-4.81016	1.50809e-06	4.69484e-05
Pxylp1	700.529	-0.650099	0.135218	-4.80778	1.52619e-06	4.74206e-05
Cables1	360.508	-0.379552	0.0790109	-4.80379	1.55687e-06	4.8281e-05
Tpi1	27120.8	0.630553	0.131377	4.79957	1.5901e-06	4.90364e-05
Terf1	192.541	0.510276	0.106318	4.79954	1.59032e-06	4.90364e-05
Zfp52	188.299	0.390686	0.0814008	4.79954	1.59034e-06	4.90364e-05
Eif1ad	1063.1	0.217521	0.045348	4.7967	1.613e-06	4.96404e-05
Ptpro	7708.04	-0.2512	0.0523991	-4.79398	1.63505e-06	5.02234e-05
Mrtfa	1488.93	-0.301914	0.062987	-4.79328	1.64077e-06	5.03035e-05
Xrcc5	548.147	0.297195	0.0620094	4.79274	1.64519e-06	5.03434e-05
Syngr3	9622.68	-0.391332	0.0817327	-4.78795	1.68494e-06	5.13705e-05
Cert1	1748.44	-0.344336	0.0719175	-4.78793	1.68511e-06	5.13705e-05
Ccdc88c	1282.46	-0.538559	0.112545	-4.78527	1.70754e-06	5.19562e-05
Cstf2	3448.84	0.413053	0.0863408	4.78398	1.71855e-06	5.21766e-05
Hibch	642.991	0.506561	0.105894	4.78367	1.72124e-06	5.21766e-05
Ube2d1	2511.69	-0.33617	0.0702929	-4.78242	1.73201e-06	5.24047e-05
Naxe	1207.15	0.304705	0.0637478	4.77986	1.75419e-06	5.29766e-05
Phgdh	810.787	0.352474	0.0737607	4.77862	1.76506e-06	5.32054e-05
Map7	376.802	-0.439529	0.0920186	-4.77653	1.78348e-06	5.34868e-05
Mzf1	387.263	-0.307371	0.0643567	-4.77606	1.78764e-06	5.34868e-05
Lonp1	3329.47	0.370294	0.0775207	4.77671	1.78186e-06	5.34868e-05
6230400D17Rik	25.3316	-0.651435	0.136392	-4.77618	1.78655e-06	5.34868e-05
Tmem168	966.12	-0.340709	0.0713473	-4.77537	1.7938e-06	5.35721e-05
Marf1	2328.93	-0.302674	0.0634669	-4.76902	1.85128e-06	5.50849e-05
Usf3	1633.86	-0.532166	0.111586	-4.76912	1.85034e-06	5.50849e-05
Rnf169	1227.81	-0.367247	0.0770229	-4.76802	1.86048e-06	5.5257e-05
Neb	685.195	-0.720808	0.151269	-4.76508	1.8878e-06	5.59656e-05
Oip5os1	31159.8	0.528808	0.111015	4.76341	1.9035e-06	5.63276e-05
Mta1	2122.84	0.283613	0.0595565	4.76209	1.91598e-06	5.65933e-05
Nuf2	32.4642	-1.26663	0.266025	-4.76133	1.92318e-06	5.67023e-05
Acp6	308.001	0.435213	0.0914421	4.75943	1.94136e-06	5.69266e-05
Tafa2	4470	0.296362	0.0622612	4.75998	1.93613e-06	5.69266e-05
Gm3693	297.304	-0.445221	0.0935398	-4.7597	1.93884e-06	5.69266e-05
Plekha8	689.087	0.312666	0.0657508	4.75532	1.98137e-06	5.7681e-05
Rnf145	2194.1	-0.232822	0.0489588	-4.75546	1.97992e-06	5.7681e-05
H2-T22	215.883	0.591118	0.124299	4.7556	1.97853e-06	5.7681e-05
H2-T9	215.883	0.591118	0.124299	4.7556	1.97853e-06	5.7681e-05
Suco	3149.44	0.351549	0.0739441	4.75426	1.99175e-06	5.78789e-05
Zfp971	240.876	0.497004	0.10464	4.74965	2.03772e-06	5.91087e-05
Mrpl45	1424.18	0.34071	0.0717415	4.74914	2.04285e-06	5.91512e-05
Ttc5	1578.9	0.32442	0.0683223	4.74838	2.05048e-06	5.92657e-05
Scd2	39067.8	0.366384	0.0771784	4.74724	2.06212e-06	5.94025e-05
Ptchd1	455.475	-0.532658	0.112205	-4.7472	2.06256e-06	5.94025e-05
Urb2	708.02	-0.294851	0.0621236	-4.7462	2.07279e-06	5.95908e-05
Abcc1	725.958	0.317473	0.0669029	4.74529	2.08212e-06	5.97528e-05
Vwa5b2	726.08	-0.336192	0.0709043	-4.7415	2.12146e-06	6.07739e-05
Pheta1	1056.3	-0.387225	0.081697	-4.73976	2.13966e-06	6.11868e-05
Trpm2	1635.34	0.547895	0.115673	4.73658	2.17357e-06	6.19372e-05
Sfswap	2685.92	-0.297231	0.0627501	-4.73674	2.17186e-06	6.19372e-05
Kmt5b	1925.08	-0.3388	0.0715485	-4.73525	2.18782e-06	6.22336e-05
Dcaf11	2782.12	0.265347	0.0560546	4.73373	2.20427e-06	6.25911e-05
Ccdc113	14.8593	0.82393	0.174095	4.73266	2.21595e-06	6.28126e-05
Mrpl30	2374.82	0.339635	0.0718053	4.72995	2.24578e-06	6.35465e-05
Msn	282.933	-0.781741	0.16531	-4.72893	2.25703e-06	6.37531e-05
Mtarc2	1106.9	0.346858	0.0733657	4.7278	2.26964e-06	6.39974e-05
Podxl	390.699	-0.447437	0.094702	-4.72469	2.30469e-06	6.48726e-05
Slc25a3	10565.4	0.271386	0.057463	4.72279	2.32626e-06	6.52933e-05
Ddrgk1	1017.04	0.334325	0.0707917	4.72267	2.32772e-06	6.52933e-05
Pecr	209.258	0.463046	0.0980667	4.72175	2.33824e-06	6.54747e-05
Wipf3	963.645	-0.556211	0.117821	-4.7208	2.34919e-06	6.56676e-05
Prdx5	4702.19	0.560969	0.118867	4.71931	2.36648e-06	6.59943e-05
Dnajc1	442.991	0.327195	0.0693345	4.71909	2.36905e-06	6.59943e-05
Dph7	738.493	-0.323472	0.0686291	-4.71334	2.43688e-06	6.77671e-05
H2-T23	92.2244	1.33051	0.282428	4.71097	2.46539e-06	6.84421e-05
Rora	738.037	0.395528	0.0840879	4.70375	2.5543e-06	7.07888e-05
Apba2	8586.54	-0.311897	0.0663152	-4.70324	2.56059e-06	7.08416e-05
Kcnk3	773.595	0.586673	0.12476	4.70241	2.57114e-06	7.10118e-05
Epn2	2008.42	-0.3916	0.083291	-4.70159	2.58143e-06	7.11744e-05
Ogg1	178.405	0.408822	0.0869823	4.70007	2.60078e-06	7.15858e-05
Nufip1	681.57	0.248184	0.0528234	4.69837	2.62245e-06	7.20593e-05
Ppid	2382.3	0.21998	0.0468769	4.69272	2.69596e-06	7.39536e-05
Echs1	2145.4	0.445941	0.0951654	4.68596	2.78649e-06	7.63074e-05
Polr1e	426.543	-0.266221	0.0568412	4.68359	2.81895e-06	7.70655e-05
Cmas	3985.22	-0.263678	0.0563147	-4.68223	2.83767e-06	7.74463e-05
Pcdhgb7	174.435	-0.639356	0.136561	-4.68185	2.84299e-06	7.74607e-05
Cuedc2	3675.35	0.322078	0.0688535	4.67772	2.90078e-06	7.89021e-05
Farsa	2109.58	0.173341	0.0370642	4.67678	2.91414e-06	7.91324e-05
Csmd2	2071.46	-0.346233	0.0740438	-4.67605	2.92452e-06	7.9281e-05
Mgarp	286.855	1.31494	0.281299	4.67455	2.94604e-06	7.97305e-05
Galk1	1044.77	0.745674	0.159581	4.67271	2.97257e-06	8.02286e-05
Fam110b	2249.47	-0.168409	0.0360419	-4.67258	2.97437e-06	8.02286e-05
Atp7b	244.517	0.829589	0.177571	4.67186	2.9848e-06	8.03757e-05
Rpl18	4882.01	0.297559	0.0637272	4.66927	3.02272e-06	8.12614e-05
Atp5d	5759.97	0.387593	0.0830198	4.66868	3.0314e-06	8.13593e-05
Mapk8	9724.43	-0.2966	0.0635393	-4.66798	3.04182e-06	8.15037e-05
Pi4k2a	2415.06	-0.235764	0.0505301	-4.66582	3.07394e-06	8.22279e-05
Mocs2	1492.95	0.593531	0.12723	4.66503	3.08575e-06	8.23936e-05
Plcxd2	5654.6	0.336222	0.0720775	4.66472	3.09033e-06	8.23936e-05
Dnajc14	1522.62	0.259525	0.0556549	4.66311	3.11466e-06	8.29053e-05
Spryd7	2139.01	-0.341536	0.0732629	4.66178	3.13485e-06	8.31689e-05
Atp5h	4811.77	0.258063	0.0553564	4.66185	3.13384e-06	8.31689e-05
Taf9b	1202.92	0.687634	0.14752	4.66129	3.14237e-06	8.32316e-05
Rtn4	36814.9	-0.213326	0.0457981	-4.65797	3.19341e-06	8.43932e-05
Dap	228.259	0.441583	0.0948058	4.65776	3.19667e-06	8.43932e-05
Bmi1	1586.83	0.446725	0.0959546	4.65559	3.23054e-06	8.50095e-05
A830036E02Rik	257.835	-0.538402	0.115642	-4.65577	3.22776e-06	8.50095e-05
Gpr180	624.17	0.516855	0.111094	4.65242	3.28058e-06	8.6046e-05
Tmco3	1016.71	-0.148071	0.0318264	-4.65245	3.28021e-06	8.6046e-05
Kcnh8	95.8827	-0.568386	0.122195	-4.65145	3.29602e-06	8.6311e-05
Pdgfc	296.075	-0.365648	0.078636	-4.64988	3.32125e-06	8.68309e-05
Cox7a2l	3569.73	0.291574	0.0627277	4.64826	3.34751e-06	8.73759e-05
Gan	2227.89	-0.488373	0.105134	-4.64527	3.39638e-06	8.85087e-05
Ncald	9728.53	-0.31881	0.0686461	-4.64425	3.41312e-06	8.88016e-05
Ufsp2	1628.74	0.362142	0.0780339	4.64083	3.47019e-06	9.01413e-05
Eif2ak1	1566.54	-0.261205	0.0562977	-4.63971	3.48891e-06	9.0482e-05
Sh3bp5l	1734.05	-0.304434	0.0656271	-4.63884	3.50362e-06	9.07179e-05
Pcdhgb6	471.521	-0.528429	0.113981	-4.63611	3.55033e-06	9.17804e-05
Igsf9	896.852	-0.358301	0.0772972	-4.63536	3.56315e-06	9.19644e-05
Wdr5b	141.008	-0.364465	0.0786393	-4.63465	3.57542e-06	9.2134e-05
Dera	44.6078	0.534947	0.115481	4.63234	3.61559e-06	9.30209e-05
Parn	1251.11	0.208883	0.0451201	4.6295	3.66556e-06	9.4007e-05
Grhpr	411.815	0.854715	0.184614	4.62975	3.66116e-06	9.4007e-05
Mtres1	555.131	0.203078	0.0438769	4.62836	3.68572e-06	9.40762e-05
Vps33a	3145.39	-0.440268	0.0951178	-4.62867	3.68029e-06	9.40762e-05
Set	5606.57	0.29274	0.0632442	4.62873	3.67912e-06	9.40762e-05
Shmt1	100.981	-0.385955	0.0834077	-4.62733	3.70412e-06	9.4253e-05
Dcaf7	13302.3	-0.247147	0.0534105	-4.62732	3.70432e-06	9.4253e-05
Zfp970	130.028	0.534759	0.115681	4.62271	3.78751e-06	9.62182e-05
Chid1	2610.35	0.293562	0.0635146	4.62196	3.80132e-06	9.63337e-05
Vim	1774.48	0.445361	0.0963675	4.62149	3.80994e-06	9.63337e-05
Dusp11	2825.6	-0.26121	0.0565205	-4.62151	3.80958e-06	9.63337e-05
Pcdhga12	458.394	-0.546489	0.11827	-4.62069	3.8247e-06	9.65557e-05
Irf2	359.37	0.341241	0.073858	4.62023	3.83318e-06	9.6619e-05
Rab33a	1211.66	0.419964	0.0909042	4.61985	3.84018e-06	9.66445e-05
Tmbim4	636.821	0.352242	0.0762525	4.61942	3.84816e-06	9.66946e-05
Hdgf	4309.38	0.508373	0.110061	4.619	3.85599e-06	9.67411e-05
Mindy3	1409.51	-0.278629	0.0603303	-4.61839	3.86724e-06	9.68728e-05
Eml6	1750.07	-0.340475	0.0737411	-4.61716	3.89019e-06	9.72968e-05
Immp2l	93.4307	0.515924	0.111752	4.61669	3.89901e-06	9.73667e-05
Stoml2	1632.62	0.329179	0.0713084	4.61628	3.90682e-06	9.74112e-05
Lemd1	290.096	-0.305828	0.0663011	-4.61272	3.9744e-06	9.89435e-05
Crip2	3862.11	-0.539161	0.116977	-4.60911	4.04393e-06	0.00010052
Zfp422	1443.48	-0.26803	0.0581608	-4.60843	4.05724e-06	0.000100696
Phactr4	90.0073	0.655927	0.142351	4.6078	4.06956e-06	0.000100847
9330102E08Rik	729.049	0.302311	0.06562	4.60699	4.0854e-06	0.000101084
Poglut2	382.976	0.309919	0.0672832	4.60618	4.10127e-06	0.000101321
Cct3	6925.81	0.235531	0.0511672	4.60317	4.16116e-06	0.000102314
Med23	1296.3	-0.2175	0.0472519	-4.60299	4.16476e-06	0.000102314
Hebp1	404.422	0.493406	0.107195	4.60288	4.16679e-06	0.000102314
Tom1	372.911	0.320382	0.0696025	4.60302	4.16412e-06	0.000102314
Pno1	1023.19	0.786084	0.170858	4.60082	4.2084e-06	0.000102734
Rps27a	7550.01	0.374474	0.0813952	4.60069	4.21085e-06	0.000102734
Hbegf	672.374	0.308096	0.0669637	4.60094	4.20594e-06	0.000102734
Taf4	507.453	-0.199384	0.0433339	-4.60112	4.20235e-06	0.000102734
Dtx4	5138.34	-0.451961	0.0982426	-4.60046	4.21567e-06	0.000102734
Ttc9c	1634.66	0.284445	0.061859	4.59829	4.25982e-06	0.000103653
C1qbp	1779.07	0.255979	0.055686	4.59684	4.28948e-06	0.000104218
Osgep	708.12	0.410897	0.0894661	4.59277	4.37402e-06	0.000106106
Prelid1	5032.96	0.308429	0.0671597	4.59247	4.38029e-06	0.000106106
Smtnl2	932.425	0.722428	0.157318	4.59214	4.38727e-06	0.000106116
Dnajc10	3166.8	0.157044	0.0342021	4.59167	4.39717e-06	0.000106196
Atp5g1	4936.43	0.323527	0.0704764	4.59058	4.42019e-06	0.000106593
Rpl24	151.541	0.31709	0.0690926	4.58934	4.44645e-06	0.000107066
Hk2	1728.01	1.19324	0.260282	4.58442	4.55238e-06	0.000109454
Shisa5	1620.44	-0.179022	0.0390583	-4.58346	4.57355e-06	0.000109799
Med9	1085.21	0.683592	0.149197	4.58182	4.60942e-06	0.000110496
Ccar2	3742.18	-0.274959	0.0600311	-4.58028	4.64352e-06	0.000111149
Rpl36al	1550.77	0.335416	0.0732492	4.57911	4.66965e-06	0.000111609
Ttll1	2679.76	-0.236166	0.0515982	-4.57703	4.71635e-06	0.000112558
Oplah	324.918	-0.697003	0.152339	-4.57533	4.75462e-06	0.00011316
Pcdhga11	614.831	-0.567868	0.124116	-4.57529	4.75556e-06	0.00011316
Ssh2	2689.88	-0.312047	0.0682578	-4.5716	4.84018e-06	0.000115004
Cdk19	1566.97	-0.634644	0.138837	-4.57115	4.85059e-06	0.000115082
Tnrc6c	3602.02	-0.312087	0.0682905	-4.57	4.87723e-06	0.000115545
Chst15	1262.13	-0.407643	0.0892182	-4.56905	4.89933e-06	0.000115898
Pard3	585.681	-0.245176	0.0536754	4.56775	4.92988e-06	0.00011645
Kansl3	3387.83	-0.151566	0.0332094	-4.56394	5.02019e-06	0.000118411
Plppr2	6902.56	-0.31049	0.0680386	-4.56345	5.03207e-06	0.000118518
Ndufv3	2678.8	0.339925	0.0744954	4.56303	5.04198e-06	0.000118578
Strn3	2669.91	0.375955	0.0825479	4.55438	5.25391e-06	0.000123289
Spata2	2191.66	-0.352848	0.0774769	-4.55424	5.25755e-06	0.000123289
Mtor	4071.01	-0.275257	0.0604654	-4.5523	5.30626e-06	0.000124251
Uqcrb	3100.98	0.487023	0.107004	4.55143	5.32822e-06	0.000124585
Psen1	1999.2	-0.3859	0.0848116	-4.55008	5.36255e-06	0.000125206
Chmp6	1047.56	0.225584	0.0495886	4.54911	5.38742e-06	0.000125605
H2bu2	915.413	-0.326065	0.071691	-4.5482	5.41078e-06	0.000125968
Ksr2	2389.68	-0.350867	0.0772343	-4.5429	5.54866e-06	0.000128807
Pym1	958.675	0.359268	0.079082	4.54298	5.54637e-06	0.000128807
Nckap5	241.375	-0.575918	0.126853	-4.54005	5.62419e-06	0.000130373
Etfb	107.02	0.503049	0.110908	4.53571	5.7409e-06	0.000132757
Cilk1	1426.63	-0.303628	0.066943	-4.53562	5.74344e-06	0.000132757
Rack1	12676.5	0.273009	0.0602063	4.53456	5.7725e-06	0.000133229
Cpox	924.949	0.524826	0.115747	4.53427	5.78039e-06	0.000133229
Zfp821	1787.04	-0.161776	0.0357023	-4.53125	5.86354e-06	0.000134953
Sgpl1	1322.72	0.387474	0.0855559	4.52889	5.92936e-06	0.000136274
Scrt2	844.502	-0.446908	0.0987699	-4.52474	6.04694e-06	0.000138779
Kmt5c	781.07	0.294552	0.0651072	4.52411	6.06488e-06	0.000138993
Dpagt1	672.354	0.424382	0.093818	4.52346	6.08368e-06	0.000139227
Caskin1	5283.85	-0.275732	0.0609669	-4.52265	6.10704e-06	0.000139563
Zfp174	393.798	-0.454584	0.100526	-4.52207	6.12367e-06	0.000139746
Ents15	556.011	-0.267528	0.0591732	-4.5211	6.15204e-06	0.000140195
Akr1a1	16510.2	0.300047	0.0663915	4.51936	6.20262e-06	0.000140555
Nudt7	52.2435	0.793463	0.175556	4.51972	6.192e-06	0.000140555
Gm12592	55.4997	-0.567625	0.12559	-4.51965	6.1942e-06	0.000140555
Tut1	637.199	0.180987	0.040047	4.51937	6.20251e-06	0.000140555
Sdhc	3842.42	0.272748	0.0603589	4.51877	6.22004e-06	0.000140752
Fam126b	3430.6	-0.447664	0.0990978	-4.51739	6.26067e-06	0.000141474
Gpr158	671.267	-0.371964	0.0823698	-4.51578	6.30827e-06	0.00014235
Aurkaip1	1868.8	0.297945	0.0660136	4.51338	6.38015e-06	0.000143771
Tbc1d24	5716.92	-0.33741	0.0747703	-4.51261	6.40336e-06	0.000144093
Pld5	101.474	-0.722319	0.160093	-4.51187	6.426e-06	0.000144402
Sos2	1450.7	-0.271998	0.0603169	-4.50947	6.49892e-06	0.000145838
Wdr20	526.402	-0.281244	0.0623774	-4.50875	6.52122e-06	0.000146135
D3Ertd751e	168.552	-0.40862	0.0906376	4.50829	6.53525e-06	0.000146247
Acer3	557.078	0.423237	0.0938926	4.50767	6.55423e-06	0.000146468
Coprs	990.182	0.477191	0.105895	4.50628	6.59736e-06	0.000147229
Slc41a1	1205.73	0.453514	0.100648	4.50596	6.60745e-06	0.00014725
Amer1	1398.87	-0.405603	0.0900254	-4.50543	6.62386e-06	0.000147413
Slc15a4	637.313	0.321018	0.0712793	4.50367	6.679e-06	0.000148232
Grid1	1814.8	-0.255212	0.0566645	-4.50391	6.67148e-06	0.000148232
Prr12	2379.97	-0.286267	0.0636326	-4.49875	6.83536e-06	0.000151286
Acadm	1045.97	0.679995	0.15115	4.49882	6.83302e-06	0.000151286
Smurf1	2868.34	-0.169877	0.0377695	-4.49774	6.86786e-06	0.000151798
Galnt9	871.473	0.530554	0.117997	4.49635	6.91293e-06	0.000152169
Dgkb	911.389	-0.436838	0.0971459	4.49672	6.90113e-06	0.000152169
Setd1b	1214.76	-0.359273	0.0798986	-4.49661	6.90449e-06	0.000152169
Abcb6	137.05	0.308753	0.0687373	4.49178	7.06308e-06	0.000155052
Ankrd17	7331.19	-0.400359	0.0891281	-4.49195	7.05743e-06	0.000155052
Lactb2	356.213	0.427306	0.0951509	4.49083	7.09458e-06	0.000155532
Phf23	1297.51	0.260709	0.0580785	4.4889	7.15904e-06	0.000156732
Sort1	8189.02	-0.327945	0.0730677	-4.48823	7.18165e-06	0.000157015
Tub	8623.16	-0.288284	0.0642764	-4.48506	7.28934e-06	0.000159154
Pcyt1a	1914.97	0.351198	0.0783154	4.4844	7.31186e-06	0.00015943
Acsf3	583.965	0.361447	0.0806177	4.48347	7.34396e-06	0.000159914
Trp53rkb	143.119	-0.404031	0.0901712	-4.48071	7.43967e-06	0.00016178
Mllt3	1180.95	0.387537	0.0865155	4.47939	7.48572e-06	0.000162563
Saal1	518.977	0.30543	0.0682628	4.47432	7.66559e-06	0.000165358
Fdft1	7738.25	0.177912	0.0397586	4.4748	7.64818e-06	0.000165358
Itga7	61.6231	0.666629	0.14896	4.47523	7.63299e-06	0.000165358
Gde1	5144.64	0.193556	0.0432581	4.47444	7.6613e-06	0.000165358
Ddhd2	1334.21	-0.292049	0.0652702	4.47446	7.66032e-06	0.000165358
Nadk2	801.351	0.402541	0.0899833	4.4735	7.69491e-06	0.000165769
Rfk	1953.06	0.434991	0.0974048	4.4658	7.97687e-06	0.0001716
Olfm1	15249.4	-0.21832	0.0488901	-4.46554	7.98684e-06	0.0001716
Srgap2	5816.4	-0.331408	0.0742325	-4.46446	8.02701e-06	0.000172234
Enpp4	572.116	0.35601	0.0797593	4.46355	8.06125e-06	0.000172732
Rapgef2	3762.14	-0.288364	0.0646082	-4.46328	8.07161e-06	0.000172732
Slc35a5	2111.25	-0.321951	0.0721446	-4.46259	8.0976e-06	0.000173059
Clasp1	5860.7	-0.402521	0.0902385	-4.46064	8.17164e-06	0.000174411
Pik3r1	8508.12	-0.407875	0.0914484	-4.46017	8.18942e-06	0.00017456
Cntnap3	1579.31	-0.53967	0.121009	-4.45975	8.20535e-06	0.000174669
Ccdc93	1202.95	0.452012	0.101436	4.45615	8.3446e-06	0.0001774
Ikbip	374.743	0.369288	0.0829011	4.45456	8.40659e-06	0.000178387
Arl6ip5	3441.84	0.304325	0.0683203	4.45439	8.41312e-06	0.000178387
Tmem50a	2536.43	0.234614	0.0526901	4.45271	8.4794e-06	0.000179087
Prrc2b	21941.9	-0.367401	0.0825111	-4.45274	8.478e-06	0.000179087
9530026P05Rik	133.605	0.817831	0.183665	4.45285	8.47387e-06	0.000179087
Rangap1	12240	0.139371	0.0313042	4.45216	8.50125e-06	0.000179314
Zkscan7	65.2634	0.588233	0.132148	4.4513	8.53507e-06	0.000179793
Idnk	581.862	0.48256	0.108428	4.45053	8.56602e-06	0.00018021
Mrpl39	1202.27	0.311036	0.0699186	4.44855	8.64519e-06	0.000181639
Nmt2	4863.1	-0.31715	0.0713018	-4.44799	8.66766e-06	0.000181874
1700008J07Rik	40.3127	-0.592075	0.133157	-4.44643	8.73071e-06	0.00018296
Pigl	190.402	-0.437837	0.098512	-4.4445	8.80969e-06	0.000184376
Rasgrf2	3388.14	-0.436284	0.0982313	-4.4414	8.93764e-06	0.00018657
Thyn1	760.384	0.360694	0.0812073	4.44165	8.92718e-06	0.00018657
Higd1a	5105.5	0.559856	0.126067	4.44093	8.95689e-06	0.000186731
Polr2a	3210.65	-0.503859	0.113469	-4.44048	8.97582e-06	0.000186884
Atp5o	7494.94	0.318716	0.0717891	4.43962	9.01181e-06	0.000187064
Cplx2	13638.7	-0.774406	0.174427	-4.43971	9.00803e-06	0.000187064
Hrob	26.785	-0.691459	0.155753	-4.43944	9.01919e-06	0.000187064
Tsen15	506.294	-0.378157	0.0851976	4.43858	9.05525e-06	0.000187571
Ndufaf6	266.476	0.411212	0.0926596	4.43788	9.0849e-06	0.000187945
Dut	811.815	0.508566	0.114609	4.43742	9.10426e-06	0.000188104
Mcoln1	1968.4	-0.186711	0.0420809	-4.43696	9.12396e-06	0.00018827
Hapln1	2668.6	-0.691526	0.155876	-4.43639	9.14812e-06	0.000188528
Uqcrh	7634.95	0.377406	0.0850978	4.43497	9.20845e-06	0.00018953
Inpp5d	104.07	-0.660106	0.148904	-4.43311	9.28853e-06	0.000190892
Mrpl55	712.35	0.265588	0.0599133	4.43288	9.29827e-06	0.000190892
Fmnl2	1680.96	-0.351254	0.0792473	-4.43238	9.31994e-06	0.000191094
Camkmt	163.522	0.529174	0.119441	4.43042	9.40498e-06	0.000192593
Magi1	3250.94	-0.282531	0.0637896	-4.42911	9.4622e-06	0.000193275
4930511A08Rik	3250.94	-0.282531	0.0637896	-4.42911	9.4622e-06	0.000193275
Vps26b	6435.61	-0.15121	0.0341499	-4.42784	9.51812e-06	0.000194172
Avl9	3121.73	-0.379959	0.0858218	-4.4273	9.5419e-06	0.000194412
Rnf11	6911.24	0.25859	0.0584233	4.42615	9.59306e-06	0.000194962
Gls2	278.457	0.640558	0.144717	4.42629	9.58696e-06	0.000194962
Elp1	4245.3	0.22646	0.051217	4.42158	9.79819e-06	0.000198881
Rpl9	8467.15	0.174935	0.0395729	4.42056	9.84453e-06	0.000199571
Gabarap	6889.47	0.285175	0.0645274	4.41944	9.89566e-06	0.000200356
Emc3	2918.92	0.126281	0.0285821	4.41818	9.95366e-06	0.000201278
Slc25a35	50.2069	0.556368	0.12596	4.41702	1.0007e-05	0.000202104
Oxct1	31676.7	0.233273	0.0528194	4.41642	1.0035e-05	0.000202239
Zfp384	1028.25	-0.254025	0.0575193	-4.41634	1.00387e-05	0.000202239
Rnf216	1435.7	-0.318234	0.0721194	-4.4126	1.02136e-05	0.000205506
Rnf187	15481	0.167122	0.0378808	4.41178	1.02522e-05	0.00020552
Mfsd1	825.859	-0.372182	0.0843553	-4.41207	1.02385e-05	0.00020552
Slc20a2	807.021	-0.32192	0.0729683	-4.41178	1.02525e-05	0.00020552
Rsad1	906.217	0.255384	0.0578992	4.41083	1.02974e-05	0.000205757
Lgals4	25.1927	0.793446	0.17989	4.41072	1.03025e-05	0.000205757
Lancl2	4168.09	-0.214421	0.0486116	-4.4109	1.02944e-05	0.000205757
Sc5d	2287.61	0.229683	0.0520807	4.41014	1.03304e-05	0.000206059
Srrd	329.758	-0.179819	0.0407984	-4.4075	1.04571e-05	0.000208114
Carm1	1853.94	-0.291168	0.0660625	-4.40746	1.04592e-05	0.000208114
Ascl1	321.455	-0.632294	0.1436	-4.40316	1.06684e-05	0.00021196
9530077C05Rik	309.242	-0.267931	0.0608563	-4.40269	1.06918e-05	0.00021196
Spg20	323.295	0.380537	0.0864281	4.40294	1.06795e-05	0.00021196
Ndc1	853.39	0.185894	0.0422337	4.40155	1.0748e-05	0.000212812
Galnt17	1894.75	-0.341828	0.0776664	-4.40123	1.07639e-05	0.000212843
Snn	5417.19	-0.540872	0.122899	-4.40096	1.07772e-05	0.000212843
Plcxd3	634.82	-0.485817	0.110395	-4.40072	1.0789e-05	0.000212843
Ndufs2	6228.9	0.287249	0.0653035	4.39867	1.08915e-05	0.000214603
Hus1	261.355	0.262957	0.0598223	4.39564	1.10446e-05	0.000217355
Ciart	145.063	0.725736	0.165201	4.39303	1.1178e-05	0.000219711
Rab33b	967.692	-0.327811	0.0746485	-4.3914	1.12625e-05	0.000221104
Rpl32	6889.48	0.230136	0.0524328	4.38916	1.1379e-05	0.00022312
Naga	540.955	0.324076	0.0738562	4.38793	1.14433e-05	0.000223837
Ube2k	4098.88	0.355435	0.0810021	4.38797	1.14413e-05	0.000223837
Prdm15	687.965	-0.233015	0.0531129	-4.38715	1.14843e-05	0.000224135
Ptger3	806.967	-0.46641	0.106314	-4.38712	1.14863e-05	0.000224135
Fundc2	1454.9	0.393867	0.0898034	4.38588	1.15516e-05	0.000225137
Col6a3	114.415	-0.609686	0.139038	-4.38503	1.15972e-05	0.000225755
Kcnh4	198.776	-0.372899	0.0851245	-4.38064	1.18333e-05	0.000229796
Fbxo8	549.37	-0.499276	0.113968	-4.38084	1.18222e-05	0.000229796
Zfyve28	612.076	-0.296185	0.0676402	-4.37884	1.19313e-05	0.000231422
Arhgap44	2778.88	-0.334138	0.0763141	-4.37846	1.19523e-05	0.000231551
Cdk9	1677.74	-0.131676	0.0300771	-4.37794	1.19805e-05	0.000231682
Lsm12	1768.08	0.138167	0.0315608	4.37781	1.19878e-05	0.000231682
Ccdc184	2023.05	0.21482	0.0490805	4.37689	1.20385e-05	0.000231791
Lrig2	1205.92	-0.249628	0.0570334	-4.37688	1.2039e-05	0.000231791
Parp10	107.306	-0.533143	0.121815	-4.37667	1.20508e-05	0.000231791
Gm2061	193.823	0.363191	0.0829758	4.37707	1.20287e-05	0.000231791
Fut4	12.8971	1.05541	0.241333	4.37327	1.22397e-05	0.000235145
Cdc42	16237.3	-0.317234	0.0725562	4.37225	1.2297e-05	0.000235965
Mt1	1229.01	0.59893	0.137044	4.37034	1.24056e-05	0.000237766
Cstb	739.606	0.389601	0.0892133	4.36708	1.2592e-05	0.0002402
Ppp1r16b	2227.76	-0.278009	0.0636593	-4.36713	1.25887e-05	0.0002402
Sobp	2470.71	-0.377307	0.0863906	-4.36746	1.25699e-05	0.0002402
Armcx3	2292.31	0.285454	0.0653585	4.36751	1.2567e-05	0.0002402
Qrich1	2927.16	-0.153291	0.0351049	-4.36666	1.2616e-05	0.000240374
Hadh	356.7	0.74859	0.171538	4.364	1.27707e-05	0.000243035
Edem2	1041.17	-0.197946	0.0453686	-4.36307	1.28251e-05	0.000243783
Cnpy2	1401.65	0.273838	0.0628214	4.359	1.30661e-05	0.000248071
Clasp2	15070.1	0.198272	0.0454982	4.3578	1.31379e-05	0.000249142
Oxld1	147.795	0.582201	0.133621	4.35712	1.31787e-05	0.000249623
Cadm4	8836.61	-0.267775	0.0614628	-4.3567	1.32041e-05	0.00024981
Gxylt2	90.1269	0.548569	0.125963	4.355	1.33065e-05	0.000251453
Aldh2	1294.4	0.291151	0.0668584	4.35474	1.33225e-05	0.000251462
Adamtsl1	241.852	-0.496933	0.114151	-4.3533	1.34105e-05	0.000252828
Asb7	777.56	-0.273308	0.0627914	-4.35264	1.3451e-05	0.000253295
Asl	630.388	0.645588	0.148374	4.35107	1.35473e-05	0.000254515
Csmd1	2223.2	-0.368141	0.0846061	-4.35124	1.35372e-05	0.000254515
Insm1	137.743	-0.666971	0.153303	-4.35067	1.35723e-05	0.000254689
Unc5b	514.236	0.332046	0.0763575	4.34858	1.37023e-05	0.000256831
Vdac1	21184.6	0.38721	0.0890828	4.34663	1.38246e-05	0.000258682
Lyplal1	199.041	0.518174	0.119216	4.34649	1.38331e-05	0.000258682
Maf1	2002.7	-0.187101	0.0430498	-4.34616	1.38543e-05	0.00025878
Pcdhga5	337.54	-0.509905	0.11736	-4.34481	1.39399e-05	0.000260077
Slc35f2	385.384	0.291896	0.0672046	4.3434	1.40297e-05	0.00026145
Clybl	494.496	0.572259	0.131788	4.34228	1.41014e-05	0.000262484
Hsp90b1	11906.3	0.252276	0.0581319	4.33972	1.42667e-05	0.000265256
Vdac3	6212.72	-0.374934	0.0864067	4.33917	1.43021e-05	0.000265608
Fam169a	3365.02	0.250147	0.0576579	4.33846	1.43483e-05	0.00026616
H2-Q10	24.1768	1.33124	0.306895	4.33778	1.43927e-05	0.000266678
Synj2	488.198	-0.492759	0.11361	-4.33727	1.44261e-05	0.00026699
Prdx6	1733.69	0.394637	0.0910193	4.33575	1.45266e-05	0.000268542
Tab2	2116.33	-0.367415	0.0847577	-4.33489	1.45832e-05	0.00026928
Pdcl3	1115.94	0.333573	0.0770117	4.33146	1.48124e-05	0.0002732
Psmc1	4611.04	0.26642	0.0615228	4.33043	1.48818e-05	0.000274028
Gm19026	48.5235	-0.490625	0.113301	-4.33029	1.48912e-05	0.000274028
Rps3	15205.5	0.281388	0.0649908	4.32966	1.49343e-05	0.000274509
Armcx4	6031.66	-0.400788	0.0925957	-4.32836	1.50224e-05	0.000275502
Zfp760	570.239	-0.605466	0.139881	4.32843	1.50173e-05	0.000275502
Nbas	1729.94	0.177378	0.0409913	4.3272	1.51015e-05	0.000276518
Cep97	487.196	0.432618	0.0999799	4.32705	1.5112e-05	0.000276518
Mfsd9	165.378	0.404193	0.0934299	4.32617	1.51727e-05	0.000277314
Cdk5rap3	1163.12	0.214624	0.0496139	4.32588	1.51923e-05	0.000277359
Gstm5	1926.83	0.418777	0.0968295	4.32489	1.52609e-05	0.000278296
Hagh	1813.9	0.323574	0.0748404	4.32352	1.53557e-05	0.000279709
Uqcrfs1	4619.62	0.241931	0.0559771	4.32195	1.54655e-05	0.000281391
Ubp1	2335.1	-0.174101	0.0403039	-4.31971	1.56232e-05	0.000283622
Ten1	688.072	-0.512648	0.118675	-4.31975	1.56207e-05	0.000283622
Nsdhl	3111.66	0.333189	0.0771437	4.31908	1.56684e-05	0.000283968
Pgk1	11382.2	0.690888	0.159967	4.31895	1.56774e-05	0.000283968
Tdrp	108.668	-0.667508	0.15457	4.31849	1.57099e-05	0.000284238
Zswim7	280.301	0.464391	0.107551	4.31788	1.57539e-05	0.000284397
Eci2	458.804	0.417662	0.0967241	4.31808	1.57395e-05	0.000284397
Prelid2	15.223	1.21308	0.280972	4.31746	1.57835e-05	0.000284614
Ppp1r13b	2790.73	-0.261699	0.0606234	-4.31681	1.58304e-05	0.000285141
Ndrg2	4066.2	0.436544	0.101165	4.31517	1.5948e-05	0.00028694
Ndnf	1506.55	-0.440569	0.102105	-4.31488	1.59686e-05	0.000286992
Ptges2	1917.91	0.238798	0.0553609	4.31348	1.60703e-05	0.000288177
Myo18b	61.7795	-0.478855	0.11101	-4.31362	1.60605e-05	0.000288177
Lias	1052.79	0.255667	0.0592773	4.31307	1.61002e-05	0.000288393
Pigs	1873.95	0.342858	0.079532	4.31095	1.62556e-05	0.000290854
Smarcc1	4367.69	-0.365465	0.0847883	-4.31032	1.63019e-05	0.00029136
Kiss1r	206.503	-0.379454	0.0881118	-4.30651	1.6585e-05	0.000296093
Zfp454	151.424	0.418229	0.097129	4.30592	1.66295e-05	0.000296559
Sun2	772.885	-0.489806	0.113786	-4.30464	1.67257e-05	0.000297946
Rabepk	890.094	0.354732	0.0824146	4.30424	1.67562e-05	0.00029816
Mcts1	1839.65	0.355208	0.0825509	4.30289	1.68582e-05	0.000299646
Lmf1	427.11	0.467364	0.108706	4.29934	1.71311e-05	0.000304162
Odr4	1893.75	0.266924	0.0621143	4.2973	1.72891e-05	0.000306631
Mrs2	487.429	0.332248	0.0773274	4.29663	1.73412e-05	0.000307216
Fem1a	3069.74	-0.231139	0.0538249	-4.29427	1.75267e-05	0.000310164
Zer1	3908.67	-0.281013	0.0654622	-4.29275	1.76473e-05	0.000311956
Uqcrc1	7723.1	0.282919	0.065913	4.29231	1.76824e-05	0.000312235
Iqce	1099.7	0.161447	0.0376287	4.29053	1.78249e-05	0.000314408
Hebp2	73.5666	-0.572009	0.133401	4.2879	1.80372e-05	0.000317805
Morc3	1302.84	-0.202548	0.0472734	-4.28461	1.83064e-05	0.000322196
Cobl	1521.57	-0.282937	0.0660549	-4.28337	1.84084e-05	0.000323639
Tia1	2936.9	-0.304867	0.0711945	-4.28217	1.8508e-05	0.000325037
Rpl6	6191.82	0.27914	0.0651925	4.28178	1.85408e-05	0.000325259
Calu	6106.79	0.236146	0.0551651	4.28071	1.86298e-05	0.000326466
Pcdhgb1	250.759	-0.541786	0.126577	-4.28029	1.86648e-05	0.000326725
Nedd4l	3423.92	-0.279626	0.0653536	-4.27866	1.88025e-05	0.000328503
Snrnp25	667.608	0.301137	0.0703821	4.2786	1.88071e-05	0.000328503
Dnajc15	577.225	0.367833	0.0859853	4.27786	1.88701e-05	0.000329249
Slc29a4	4455.82	-0.35214	0.0823556	-4.27585	1.90407e-05	0.000331868
Slc25a37	439.788	0.220684	0.0516257	4.27469	1.914e-05	0.000333238
Kdm2a	2630.58	0.249654	0.0584216	4.27332	1.92587e-05	0.000334943
Gltp	203.525	0.460667	0.107831	4.27211	1.93634e-05	0.000336402
9630001P10Rik	50.1533	0.941247	0.22036	4.27141	1.94241e-05	0.000337096
Zmynd8	2481.24	-0.213006	0.0498788	-4.27047	1.95059e-05	0.00033815
Gsto2	27.9849	0.825144	0.193269	4.26942	1.95985e-05	0.000339392
Zc3h3	178.299	-0.347524	0.0814405	-4.26721	1.97932e-05	0.000342397
Pja2	15838.6	-0.171653	0.0402301	-4.26678	1.98316e-05	0.000342694
Eml2	4117.41	0.360842	0.0846022	4.26516	1.99756e-05	0.000344814
Myh3	72.2512	-0.667268	0.156509	-4.26346	2.01288e-05	0.000347088
Rab39	125.631	0.443877	0.104172	4.26102	2.03499e-05	0.000350527
Zbed3	297.055	0.386139	0.0906393	4.26017	2.04272e-05	0.000351482
Ppa1	3357.15	0.258432	0.0606799	4.25894	2.054e-05	0.000353048
Cdk5rap2	394.421	-0.338942	0.0795988	-4.25813	2.06146e-05	0.000353954
Hdac8	230.35	0.242119	0.0568668	4.25765	2.06589e-05	0.000354337
Neto1	2293.75	-0.380574	0.0893976	-4.2571	2.07099e-05	0.000354836
Dusp14	443.947	-0.316329	0.0743111	-4.25682	2.07357e-05	0.000354902
Slc38a10	4365.98	0.275946	0.0648391	4.25586	2.08248e-05	0.000356049
Cadps2	2178.39	-0.513207	0.120622	-4.25467	2.09359e-05	0.000357571
Pced1a	756.194	-0.163886	0.0385357	-4.25284	2.11077e-05	0.000360123
Apip	801.472	0.403996	0.0950042	4.2524	2.11496e-05	0.000360457
Dhrs3	58.6032	-0.615436	0.144768	-4.25119	2.12641e-05	0.000362028
Gtpbp1	2007.22	-0.407138	0.0958206	-4.24896	2.14769e-05	0.000364882
Psrc1	178.974	-0.435194	0.102423	-4.24899	2.14736e-05	0.000364882
Rapgef1	5739.19	-0.301351	0.0709406	-4.24793	2.15752e-05	0.000366166
Mex3c	1688.82	-0.238516	0.0561526	-4.24764	2.16037e-05	0.000366266
Mapk1ip1l	1975.99	-0.289806	0.0682538	-4.24601	2.17615e-05	0.000368201
Tigd5	377.047	-0.266604	0.0627896	-4.24599	2.17635e-05	0.000368201
Mgat4b	3638.51	0.515414	0.1214	4.24557	2.18036e-05	0.000368494
Tbl1x	3044	-0.193285	0.0455413	-4.24416	2.19417e-05	0.000369729
Abraxas2	890.63	-0.331164	0.0780286	-4.24414	2.19433e-05	0.000369729
Tmed5	820.927	0.387349	0.0912672	4.24412	2.19453e-05	0.000369729
Bbx	545.278	-0.462526	0.108995	4.24354	2.20019e-05	0.000369911
Hsd17b10	1171.97	0.427735	0.100794	4.24366	2.19902e-05	0.000369911
Patl1	817.412	-0.381669	0.08995	-4.24312	2.20429e-05	0.000370205
Slc25a16	1088.11	0.419783	0.0989379	4.2429	2.20652e-05	0.000370205
Parl	588.076	0.258391	0.0609148	4.24185	2.21686e-05	0.000371554
Armcx1	2805.17	-0.456585	0.107704	4.23926	2.24253e-05	0.000375467
Zfp287	626.305	0.247491	0.0583928	4.23839	2.2513e-05	0.000376284
Dars2	956.941	0.278849	0.0657924	4.23831	2.25207e-05	0.000376284
Triap1	771.813	-0.27793	0.0655859	4.23764	2.25878e-05	0.000376626
Thsd4	285.083	-0.737911	0.174126	-4.2378	2.25722e-05	0.000376626
Zfhx2	748.727	-0.317597	0.0749584	-4.23697	2.26554e-05	0.000377364
Kdm2b	1836.45	-0.228351	0.0539116	-4.23566	2.27878e-05	0.000379178
Plaat1	121.25	0.536405	0.126672	4.23459	2.28969e-05	0.000380601
Tsku	191.025	-0.320546	0.0757168	-4.23349	2.30092e-05	0.000382076
Tnk2	2183.48	-0.340659	0.0804952	-4.23205	2.31573e-05	0.000383746
Slc16a1	1461.07	0.435377	0.102874	4.23214	2.31477e-05	0.000383746
Pkhd1l1	20.0795	-0.75453	0.178412	-4.22914	2.34585e-05	0.000388339
Dixdc1	1780.6	-0.31464	0.0744116	-4.22837	2.35386e-05	0.000389267
Wdr13	11816.4	-0.137113	0.0324411	-4.22652	2.37337e-05	0.000392092
Atp5c1	10370.9	0.302967	0.0716964	4.2257	2.38203e-05	0.00039312
Rbm33	2640.3	-0.151753	0.0359188	-4.22488	2.39067e-05	0.000394143
Atn1	256.202	-0.344599	0.0815898	-4.22356	2.40475e-05	0.000396061
Mindy2	2794.26	0.648609	0.153596	4.22283	2.41252e-05	0.000396936
Cbr4	589.891	0.430765	0.10203	4.22194	2.42213e-05	0.000398112
Glud1	4458.72	0.181165	0.0429249	4.2205	2.43756e-05	0.00040024
Gadd45b	133.826	-0.371804	0.0881046	-4.22002	2.44277e-05	0.000400344
Thumpd3	1170.3	0.258001	0.0611378	4.21999	2.44315e-05	0.000400344
Psmb5	2216.36	0.225395	0.0534256	4.21885	2.45554e-05	0.000400708
Tmem234	2749.32	-0.331448	0.0785669	4.21867	2.45752e-05	0.000400708
Igsf3	3558.16	-0.343071	0.0813226	-4.21864	2.45777e-05	0.000400708
Klf13	3326.74	-0.456727	0.108259	-4.21883	2.45568e-05	0.000400708
Hnrnpc	8838.5	0.222054	0.0526279	4.21932	2.45035e-05	0.000400708
Sdhd	6018.67	0.302878	0.0718106	4.21774	2.46767e-05	0.000401917
Gtf2b	1229.05	0.378393	0.0897904	4.21418	2.5069e-05	0.000407016
Nudt19	2426.68	0.411901	0.0977398	4.21426	2.50599e-05	0.000407016
Sstr4	98.0968	-0.562861	0.13357	-4.21398	2.50905e-05	0.000407016
Rps17	6123.79	0.319125	0.0757255	4.21424	2.50624e-05	0.000407016
AW209491	805.345	0.286278	0.0679602	4.21244	2.5263e-05	0.000408992
Poldip3	2754.91	0.136249	0.0323436	4.21255	2.52505e-05	0.000408992
Tm9sf4	4007.42	-0.235728	0.0559874	-4.21038	2.54944e-05	0.000412326
Slc6a6	6701.78	-0.394592	0.0937661	-4.20826	2.57343e-05	0.000415789
Fxr2	3433.58	0.304394	0.0723403	4.20781	2.57858e-05	0.000416205
Aldoa	35266	0.538253	0.128019	4.20447	2.61695e-05	0.000421976
Kcnv1	1151.21	-0.547346	0.130191	-4.20417	2.62047e-05	0.000422123
Fbxl4	522.931	0.216726	0.0515679	4.20272	2.63722e-05	0.000424398
Pomk	1608.62	0.231852	0.0551808	4.20168	2.64936e-05	0.000425928
Slamf9	19.5221	-0.987472	0.235209	-4.19827	2.68967e-05	0.000431978
Sat2	206.968	0.254094	0.0605325	4.19764	2.69709e-05	0.000432739
Mrps31	782.942	0.305849	0.0728927	4.19588	2.71819e-05	0.000435261
Tcim	339.502	-0.596253	0.142098	-4.19606	2.71602e-05	0.000435261
Msrb2	105.018	0.502601	0.119804	4.19519	2.72644e-05	0.00043615
Tprkb	1463.68	0.293827	0.0700497	4.19456	2.73408e-05	0.000436938
Emc2	2904.54	0.34012	0.0811488	4.19132	2.77337e-05	0.000442532
H2-Ab1	235.132	1.17888	0.281273	4.19122	2.77455e-05	0.000442532
Gmeb1	969.901	-0.303111	0.0723665	-4.18856	2.80735e-05	0.000447322
Gon4l	1372.76	-0.198618	0.0474287	-4.18771	2.81788e-05	0.000448556
Usp33	2891.11	-0.186666	0.0445899	-4.18629	2.83555e-05	0.000450926
Gdi2	11216.9	0.184277	0.0440256	4.18568	2.8431e-05	0.000451681
Prmt5	3777.05	0.0971736	0.0232189	4.1851	2.85038e-05	0.000452393
Cinp	1645.65	-0.16778	0.0401027	-4.18375	2.86739e-05	0.000454645
Plcg1	3425.25	-0.170829	0.040842	-4.18268	2.88095e-05	0.000456348
Kif3c	11639	-0.301284	0.0720544	-4.18134	2.89792e-05	0.000458587
Zbed4	312.578	0.323898	0.0774695	4.18097	2.90266e-05	0.000458888
Oat	3980.74	0.2632	0.0629755	4.17941	2.92272e-05	0.000461606
Prxl2c	86.2648	0.55132	0.131927	4.17899	2.92811e-05	0.000462006
Zfp874a	539.015	0.466492	0.111638	4.17861	2.9329e-05	0.000462311
Ccdc9b	73.736	-0.387746	0.0928512	-4.176	2.96686e-05	0.000467208
Gm13749	7.75578	-1.50852	0.361381	-4.17433	2.9886e-05	0.000470173
Dazap2	1822.17	0.472989	0.113323	4.17382	2.99529e-05	0.00047031
Caln1	10885.2	-0.33045	0.0791705	-4.1739	2.99428e-05	0.00047031
Abraxas1	117.278	0.393408	0.0942755	4.17296	3.00663e-05	0.000471632
Kdsr	843.075	-0.494574	0.118529	-4.17261	3.01133e-05	0.000471912
Stx6	1797.52	-0.477555	0.114466	-4.17202	3.01912e-05	0.000472673
Gpatch11	1406.79	0.322058	0.0772322	4.16999	3.04608e-05	0.000476202
Tmem132b	3446.71	-0.37238	0.0893021	-4.16988	3.04755e-05	0.000476202
Rpl11	6025.07	0.358188	0.0859133	4.16918	3.05694e-05	0.000476747
LOC115489947	6025.07	0.358188	0.0859133	4.16918	3.05694e-05	0.000476747
Gnb5	1902.01	0.238256	0.0571615	4.16812	3.07121e-05	0.00047851
Thap3	373.15	0.46739	0.112147	4.16767	3.0773e-05	0.000478997
Trim36	386.304	0.422893	0.101496	4.16661	3.09162e-05	0.000480763
Bcl2l1	3092.89	-0.358819	0.0861293	-4.16605	3.09925e-05	0.000481487
Zbtb41	1502.75	0.405014	0.0972295	4.16555	3.10604e-05	0.000482078
Fut8	1801.81	0.201448	0.048384	4.16353	3.13371e-05	0.000485905
Eipr1	1227.47	-0.152382	0.0366156	-4.16167	3.15935e-05	0.000489412
Gm10710	26.0194	-1.0124	0.243373	-4.15989	3.18408e-05	0.000492769
Ppp2ca	19703.1	0.150543	0.0361976	4.15893	3.19748e-05	0.000494219
Dpy19l3	1608.36	-0.266326	0.0640395	-4.15878	3.19956e-05	0.000494219
Pgd	1951.44	0.141564	0.0340489	4.15766	3.21526e-05	0.00049617
Sema4d	932.033	-0.261577	0.06293	-4.15664	3.22962e-05	0.00049791
Mfap1a	755.708	-0.411022	0.0989112	-4.15547	3.24622e-05	0.000499993
Tpra1	501.182	-0.18172	0.0437389	-4.15466	3.25771e-05	0.00050078
Tbp	780.038	-0.223566	0.053813	-4.1545	3.25996e-05	0.00050078
Zdhhc6	671.593	-0.241341	0.0580922	-4.15446	3.26063e-05	0.00050078
Srsf4	426.403	-0.202943	0.0488628	-4.15332	3.27691e-05	0.000502802
Cnot7	4208.54	-0.230611	0.0555404	-4.15212	3.29405e-05	0.000504952
Tiam1	2173.8	-0.310137	0.0747292	-4.15015	3.32258e-05	0.000508751
Dnaja2	5976	-0.231762	0.0558466	-4.14997	3.32513e-05	0.000508751
H2-Q4	19.656	1.25999	0.303676	4.14911	3.33775e-05	0.0005102
Tfpi	65.6222	0.553234	0.133353	4.14865	3.34439e-05	0.000510731
Ehmt1	1899.59	-0.326948	0.0788561	-4.14614	3.38126e-05	0.000515874
Ptpra	5354.22	-0.164657	0.0397183	-4.14561	3.38917e-05	0.000516105
Rasa3	1458.72	-0.413123	0.099653	-4.14561	3.38903e-05	0.000516105
Fam102b	4791.91	-0.482648	0.116502	-4.14284	3.43028e-05	0.000521875
Dab1	4363.23	-0.316844	0.0764988	-4.14182	3.4456e-05	0.000523712
Aff3	2124.27	-0.282787	0.0682868	-4.14117	3.45543e-05	0.000524713
Pde4a	1791.02	0.32831	0.0792977	4.14022	3.46977e-05	0.000526394
Coro2b	3057.43	-0.413554	0.0999026	-4.13957	3.47959e-05	0.00052739
Pcnt	405.303	-0.348075	0.0841198	-4.13785	3.50568e-05	0.000530846
Tstd3	551.852	0.5287	0.127784	4.13744	3.51199e-05	0.000531303
Rrp7a	2549.55	0.444135	0.107355	4.13708	3.51754e-05	0.000531646
Asb13	860.147	-0.552205	0.133501	4.13632	3.52921e-05	0.000532911
Mmd	3016.69	-0.333531	0.0806399	-4.13605	3.53329e-05	0.000533028
Bcl6	418.828	-0.460192	0.111325	-4.13378	3.56852e-05	0.000537842
Sqle	9630.46	0.263151	0.0636748	4.13274	3.58467e-05	0.000539771
Snrnp27	1185.35	0.311557	0.07542	4.13097	3.61242e-05	0.000543444
Cfap20dc	340.432	0.278861	0.067561	4.12754	3.66666e-05	0.00055109
Nop9	849.417	0.22567	0.0546792	4.12717	3.67254e-05	0.000551461
Ace3	11.6163	-0.928993	0.225121	4.12665	3.6809e-05	0.000552204
Zhx1	1839.5	-0.382533	0.0927151	-4.1259	3.69281e-05	0.000553476
Synrg	3024.2	-0.266845	0.0646927	-4.12481	3.71044e-05	0.000555602
Nutf2	1289.88	-0.300084	0.0728329	4.12017	3.7859e-05	0.000566377
Rab23	1059.9	-0.217286	0.0527595	-4.11842	3.81486e-05	0.000568543
Atf1	131.986	-0.348423	0.0846034	-4.11831	3.81664e-05	0.000568543
Mxi1	1802.83	-0.190291	0.0462066	-4.11826	3.81743e-05	0.000568543
Nmd3	1397.68	0.232531	0.0564589	4.11859	3.8119e-05	0.000568543
Bag4	964.064	-0.230295	0.0559238	-4.11802	3.82149e-05	0.000568543
Slc35f1	7581.23	-0.295287	0.0717029	-4.1182	3.81845e-05	0.000568543
Tmem196	123.835	-0.420349	0.102094	4.11729	3.83361e-05	0.000569822
Hpcal1	2027.34	-0.345863	0.0840077	-4.11704	3.83777e-05	0.000569916
Chchd6	2915.03	0.342102	0.0831	4.11675	3.84249e-05	0.000570092
Asb16	53.2744	0.622794	0.151353	4.11486	3.87421e-05	0.000574272
Ndufaf5	1568.09	0.194852	0.0473609	4.1142	3.8853e-05	0.000575388
Ech1	1163.41	-0.776704	0.188829	4.11326	3.90105e-05	0.000577191
Ctdspl	370.981	-0.383904	0.0933399	-4.11297	3.90603e-05	0.000577399
Rps11	3772.85	0.229859	0.0558927	4.1125	3.91403e-05	0.000578054
Nup50	1595.08	-0.222479	0.0541219	-4.1107	3.94469e-05	0.000582049
Mrps6	1260.44	-0.268302	0.0653104	4.10811	3.98913e-05	0.000588069
Ecsit	1321.18	0.355918	0.086652	4.10743	4.00079e-05	0.00058925
Nop10	2279.63	0.496184	0.120824	4.10665	4.01441e-05	0.000590718
Relb	117.994	-0.393032	0.0957167	-4.10621	4.02211e-05	0.000590775
Flrt1	788.606	-0.260074	0.0633354	-4.1063	4.0205e-05	0.000590775
Dnajb5	3395.82	-0.211702	0.0515971	-4.10299	4.07846e-05	0.000597423
Ube2l3	1663.49	-0.218297	0.0532019	-4.10318	4.07516e-05	0.000597423
Prdm10	576.742	-0.222398	0.0542008	-4.10322	4.07432e-05	0.000597423
Lzts3	2575.23	-0.235941	0.0575081	-4.10274	4.08287e-05	0.000597526
Rai1	2699.4	-0.218884	0.0533542	-4.10246	4.08774e-05	0.000597698
Pkp4	8231.85	-0.251227	0.0613132	-4.09743	4.1776e-05	0.000610285
Ice1	6658.63	-0.23392	0.0571184	-4.09536	4.21521e-05	0.000615222
Amacr	219.694	0.534882	0.130627	4.09473	4.22653e-05	0.000615762
Pfdn4	1204.68	0.406845	0.0993538	4.09492	4.22319e-05	0.000615762
Mapre2	13148.1	-0.32826	0.0801761	-4.09424	4.23555e-05	0.000616457
Ccdc28b	1315.06	0.384858	0.0940088	4.09385	4.24274e-05	0.000616457
D630045J12Rik	2662.17	-0.399105	0.0974882	-4.09388	4.24219e-05	0.000616457
Ik	3322.13	0.175497	0.0428718	4.09353	4.2486e-05	0.000616491
Phf2	1528.13	-0.352973	0.0862295	-4.09342	4.25061e-05	0.000616491
Cfap57	140.422	-0.906625	0.221503	-4.09306	4.25713e-05	0.000616884
Tmem64	631.858	-0.416099	0.101666	4.09281	4.26184e-05	0.000617012
Anapc1	4609.31	0.280936	0.0686542	4.09204	4.27588e-05	0.000617447
Ndufv1	4491.99	0.22788	0.0556838	4.0924	4.26933e-05	0.000617447
Hmgcs1	41847.4	0.246865	0.0603283	4.09202	4.27631e-05	0.000617447
Ankle2	1303.2	-0.218782	0.0534763	-4.09119	4.29167e-05	0.000619111
Spag7	1421.09	0.233237	0.0570264	4.08999	4.31384e-05	0.000621028
Cpne8	871.308	-0.591362	0.144587	-4.09001	4.3135e-05	0.000621028
Gak	3159.84	-0.342735	0.0838013	-4.08985	4.31648e-05	0.000621028
Gm37500	8.77434	-1.06464	0.26037	-4.08894	4.33356e-05	0.00062293
Eml4	1581.09	-0.457784	0.112004	-4.08722	4.36577e-05	0.000627002
Pum1	3557.82	-0.309995	0.0758544	-4.08671	4.37528e-05	0.00062781
Sft2d1	598.25	-0.300809	0.0736135	-4.08633	4.38256e-05	0.000628297
Fem1b	10951.8	0.28648	0.0701115	4.08606	4.38762e-05	0.000628464
Spata13	211.74	-0.546304	0.133717	-4.08554	4.39749e-05	0.000628921
Psmg1	635.16	0.313775	0.0768062	4.08527	4.40249e-05	0.000628921
Mtln	661.493	0.397008	0.0971792	4.08532	4.40152e-05	0.000628921
Ikzf4	825.881	-0.405245	0.0992114	-4.08467	4.41401e-05	0.00063001
P4hb	7353.64	0.215314	0.0527239	4.0838	4.4305e-05	0.000631806
Zmiz1	4642.95	-0.312331	0.0765526	-4.07996	4.5044e-05	0.000641777
Cyrib	5029.08	-0.23528	0.0577036	-4.07739	4.55437e-05	0.000648326
Ndufb3	1856.53	0.460725	0.113031	4.07609	4.57987e-05	0.000651381
Lsm11	6716.4	0.263373	0.0646316	4.075	4.60152e-05	0.000653886
1110002E22Rik	93.6209	-0.765872	0.188014	-4.07349	4.63132e-05	0.000657541
Pou2f2	208.482	-0.314591	0.0772664	-4.0715	4.67104e-05	0.000661437
Slc4a7	2334.48	0.395886	0.0972329	4.07152	4.67065e-05	0.000661437
Tmem229a	595.632	0.35775	0.0878639	4.07164	4.66842e-05	0.000661437
Sart3	1198.39	-0.15828	0.0388933	-4.06961	4.70927e-05	0.000665323
Rps6ka2	2781.54	-0.277367	0.0681571	-4.06953	4.71083e-05	0.000665323
Rrp1	8193.6	0.22934	0.0563549	4.06957	4.71005e-05	0.000665323
Thoc7	1214.31	0.339312	0.0833837	4.06928	4.71593e-05	0.000665461
Stx3	664.975	-0.254687	0.0626137	-4.06759	4.75027e-05	0.000669721
Slc9a9	481.734	-0.424085	0.104275	4.06697	4.76274e-05	0.000670895
Coro1c	4721.15	-0.209861	0.0516198	-4.0655	4.79286e-05	0.000674549
Coq3	1012.38	0.35138	0.086437	4.06516	4.7999e-05	0.000674952
Gmnn	86.7157	0.683542	0.168185	4.06422	4.81932e-05	0.000677093
Cep78	536.929	0.265283	0.0652874	4.06331	4.83812e-05	0.000679144
Ndufa9	3119.12	0.215027	0.052927	4.0627	4.85079e-05	0.000679741
Atat1	5429.28	-0.305381	0.0751667	-4.06271	4.85055e-05	0.000679741
Pum2	6823.05	-0.155012	0.0381735	-4.06073	4.89192e-05	0.000684911
Mief2	975.694	-0.248021	0.0611053	-4.05891	4.93019e-05	0.000687885
Stk38	756.026	-0.338254	0.0833315	-4.05914	4.92542e-05	0.000687885
Tmem127	9212.91	-0.184499	0.0454537	-4.05906	4.92716e-05	0.000687885
Pcyt1b	4968.35	0.303309	0.0747207	4.05924	4.92326e-05	0.000687885
Ccdc107	1274.29	0.290451	0.0715869	4.05733	4.96374e-05	0.000691968
Cacfd1	2241.56	0.143462	0.0353645	4.05667	4.97769e-05	0.000693316
Nup214	1085.01	-0.295242	0.0727984	-4.05561	5.00034e-05	0.000695142
Dmac1	1077.67	0.229441	0.0565761	4.05544	5.00403e-05	0.000695142
Ccdc120	777.592	-0.32587	0.0803575	-4.05525	5.00801e-05	0.000695142
Nt5dc3	8480.49	-0.260349	0.0641955	-4.05557	5.00124e-05	0.000695142
Cox5a	2055.34	0.241943	0.0596773	4.05418	5.03098e-05	0.000697132
Birc5	29.9858	-0.639997	0.157858	-4.05425	5.02957e-05	0.000697132
Trpc4ap	6791.31	-0.232403	0.0573432	-4.05284	5.05988e-05	0.000700536
Agap2	17746.8	-0.280747	0.0692928	-4.05161	5.08669e-05	0.000703645
Sbno2	452.056	-0.28162	0.0695359	-4.04999	5.12191e-05	0.00070791
Mex3d	1538.7	-0.202761	0.0500815	-4.04863	5.15178e-05	0.00071143
Arf3	28231.2	-0.209335	0.0517147	-4.04788	5.16828e-05	0.000713099
Ddit4	6466.48	0.889794	0.220072	4.04319	5.27281e-05	0.000726902
Rps4x	10252.8	0.327994	0.0811489	4.04188	5.30237e-05	0.000729731
Trav9-4	3.65335	-1.63158	0.403651	-4.04205	5.29852e-05	0.000729731
Aldoc	2100.9	0.685869	0.1697	4.04165	5.30763e-05	0.000729832
Arpc1b	92.5691	0.556594	0.137727	4.0413	5.31559e-05	0.000730033
Magee2	411.741	-0.434228	0.107451	-4.04119	5.31812e-05	0.000730033
Pomgnt1	2672.76	0.134916	0.0333934	4.0402	5.34052e-05	0.000731864
2510003B16Rik	2672.76	0.134916	0.0333934	4.0402	5.34052e-05	0.000731864
Lefty2	157.336	1.00109	0.247828	4.03945	5.3577e-05	0.000733596
Enpp3	47.8706	-0.658493	0.163054	-4.03849	5.37968e-05	0.000735982
Hs6st1	2847.54	-0.283559	0.0702284	-4.03767	5.39858e-05	0.000737943
Ephb1	839.153	-0.244176	0.0604983	-4.03607	5.43529e-05	0.000742332
Pam16	563.292	0.332252	0.0823993	4.03221	5.5254e-05	0.000754003
Qser1	1046.1	-0.224624	0.055718	-4.03144	5.5437e-05	0.000755862
Cmc1	437.468	0.304936	0.0756512	4.03082	5.55837e-05	0.000757222
Dlx2	427.279	-0.398565	0.0989057	-4.02975	5.58367e-05	0.000759389
Ecm1	96.1176	-0.420675	0.104387	-4.02994	5.57919e-05	0.000759389
Rap2b	798.325	-0.408015	0.101272	-4.02891	5.60358e-05	0.000761456
Tkt	9171.73	0.172529	0.0428535	4.02601	5.67304e-05	0.000770246
Rpn1	8607.69	0.179269	0.0445312	4.0257	5.68052e-05	0.000770614
Tomm40l	628.907	0.390437	0.0970058	4.02488	5.70037e-05	0.000772658
Sox2ot	1074.85	-0.29931	0.074395	-4.02326	5.73987e-05	0.000777361
Rcor2	419.319	0.401664	0.0998615	4.02221	5.76554e-05	0.000780183
Itgb5	209.102	-0.568318	0.141309	-4.02181	5.77535e-05	0.000780857
Tceal3	1410.41	0.394984	0.0982264	4.02116	5.79133e-05	0.000781395
Shb	455.727	-0.415344	0.103301	-4.02074	5.80168e-05	0.000781395
Zfp956	901.715	0.200299	0.0498173	4.02068	5.80316e-05	0.000781395
Mn1	2189.28	-0.252578	0.0628232	-4.02046	5.80835e-05	0.000781395
Zfx	760.432	-0.278564	0.0692857	-4.02052	5.80708e-05	0.000781395
3110045C21Rik	25.1541	0.676723	0.168308	4.02076	5.80117e-05	0.000781395
Slc24a3	3788.39	-0.256441	0.0637873	-4.02025	5.81355e-05	0.000781444
Tecr	11039.4	0.1479	0.0368055	4.01842	5.85904e-05	0.000786904
Jade3	464.35	-0.398671	0.0992454	-4.01702	5.89392e-05	0.00079093
Mtx1	730.604	-0.388827	0.0968328	-4.01544	5.93344e-05	0.000795574
Cacna1i	2476.34	-0.322719	0.0803746	-4.01518	5.93998e-05	0.00079579
Mycn	1137.46	-0.394258	0.0982334	-4.01348	5.98292e-05	0.000800215
Gng5	342.558	0.359013	0.0894487	4.01362	5.9794e-05	0.000800215
Zfp335os	41.9573	-0.772462	0.192481	-4.01318	5.99067e-05	0.00080059
Adgre5	29.0943	-0.752274	0.187539	-4.0113	6.03843e-05	0.000806305
Ppp1r14c	3337.53	-0.282529	0.0704722	-4.00908	6.09557e-05	0.000813263
Pcca	715.478	0.280208	0.0699043	4.00845	6.11184e-05	0.000814761
Smc5	1278.79	0.159683	0.0398561	4.00648	6.16295e-05	0.000820896
Tomm40	2176.67	0.254136	0.0634977	4.00228	6.27355e-05	0.00083494
Ift80	464.48	0.357677	0.0893814	4.00169	6.28912e-05	0.000835636
Rpap1	739.671	-0.319519	0.0798449	-4.00174	6.28772e-05	0.000835636
Usp32	4611.45	-0.233108	0.0582756	-4.0001	6.33159e-05	0.000840588
Rcc1l	550.085	0.207037	0.0517616	3.99981	6.33936e-05	0.000840928
Tmem268	296.269	0.299455	0.0748712	3.9996	6.34501e-05	0.000840987
Cnst	1295.3	-0.215692	0.0539406	-3.99869	6.36935e-05	0.000843521
Dedd	157.274	0.20831	0.0520991	3.99834	6.3789e-05	0.000844095
Ndufa8	2895.66	0.286773	0.0717334	3.99777	6.3943e-05	0.000845439
Ogfod1	1120.5	-0.275962	0.0690332	-3.99753	6.4006e-05	0.00084558
Cox4i2	22.9154	1.06013	0.265231	3.99699	6.41517e-05	0.000846813
Kif13a	1653.23	-0.2546	0.063708	-3.99636	6.43237e-05	0.00084839
Ppp1r3c	425.656	-0.507325	0.126963	3.99586	6.44609e-05	0.000849506
Ntsr2	87.7229	0.622567	0.155871	3.99412	6.49357e-05	0.000855066
Clip1	4452.92	-0.23724	0.0594107	-3.99322	6.51811e-05	0.000857598
Bcdin3d	153.529	-0.328025	0.0821876	-3.99117	6.57475e-05	0.000862942
Mapk15	120.778	-0.743876	0.186377	-3.99124	6.57301e-05	0.000862942
H1f0	2560.65	0.253286	0.0634578	3.99141	6.56823e-05	0.000862942
Nell2	15861.5	-0.2481	0.062173	-3.99048	6.59385e-05	0.00086379
Rybp	1558.08	-0.384208	0.0962841	-3.99036	6.59724e-05	0.00086379
Rybp-ps	1558.08	-0.384208	0.0962841	-3.99036	6.59724e-05	0.00086379
Hsd17b7	2608.42	0.265539	0.0665783	3.98837	6.65299e-05	0.000870383
Cdkn1c	87.4067	0.624309	0.156564	3.98757	6.67532e-05	0.000871985
Rgma	2253.4	-0.313468	0.0786117	-3.98755	6.67603e-05	0.000871985
P3h4	253.615	0.526617	0.132082	3.98703	6.69053e-05	0.000873173
Gtf2e2	1082.08	0.406624	0.10201	3.9861	6.71679e-05	0.000875893
Utp15	814.509	-0.192663	0.0483475	-3.98497	6.74888e-05	0.000879368
Scml2	85.7795	0.415389	0.104248	3.98463	6.75842e-05	0.000879902
Gtf2h4	483.354	0.285645	0.0717646	3.98031	6.8826e-05	0.000895348
Ankzf1	945.104	0.321413	0.0807852	3.97862	6.93178e-05	0.000900295
Pja1	8203.76	-0.159862	0.0401794	3.97871	6.92897e-05	0.000900295
Kcnmb4os2	84.6925	-0.590516	0.148449	-3.9779	6.95254e-05	0.000902267
Ccdc43	725.411	0.38677	0.0972523	3.97698	6.97971e-05	0.000904583
Ap2b1	25935.3	-0.334447	0.0840972	-3.97691	6.98159e-05	0.000904583
Alkbh4	262.285	-0.459914	0.115693	-3.9753	7.02895e-05	0.00090999
Chic1	404.956	0.360755	0.0908002	3.97307	7.09528e-05	0.000917842
Chmp1a	5732.88	-0.224595	0.0565598	-3.97093	7.15931e-05	0.000924175
Csmd3	1294.44	-0.258494	0.065104	-3.97048	7.17284e-05	0.000924175
Slc30a10	447.436	0.368963	0.0929255	3.97053	7.17144e-05	0.000924175
Prickle2	4973.53	-0.233445	0.058789	-3.9709	7.16012e-05	0.000924175
Mcmbp	1031.94	-0.201805	0.050824	-3.97066	7.16732e-05	0.000924175
Tacc2	3351.1	-0.173763	0.0437662	-3.97024	7.1799e-05	0.000924348
Ipo13	1734.02	-0.311811	0.0785554	-3.96931	7.20803e-05	0.000927231
Cnnm3	684.211	-0.223252	0.0562503	-3.96891	7.22024e-05	0.000927716
Setx	3329.13	-0.230273	0.0580207	-3.96881	7.22329e-05	0.000927716
H13	3288.84	-0.256653	0.0646714	-3.96857	7.2305e-05	0.000927905
Npnt	881.507	-0.671839	0.169313	-3.96803	7.24687e-05	0.000929267
Atg7	960.073	-0.260959	0.0657863	-3.96677	7.28537e-05	0.000933464
Rtf2	2538.37	-0.178814	0.0451101	-3.96395	7.37192e-05	0.000943805
Zscan18	944.859	0.168606	0.0425424	3.96324	7.39393e-05	0.000945873
Slc22a5	516.127	0.435676	0.109935	3.96304	7.40011e-05	0.000945914
Psen2	615.73	0.249938	0.0630857	3.96188	7.4361e-05	0.000949764
Kcnj6	309.104	-0.600181	0.151502	-3.96153	7.44695e-05	0.000950398
Dars	3807.46	0.305373	0.077104	3.96054	7.47811e-05	0.000953621
Rab3il1	157.616	0.6518	0.164597	3.95998	7.49556e-05	0.000954287
1700028E10Rik	53.5781	0.357405	0.0902583	3.95981	7.50105e-05	0.000954287
Gm3704	53.5781	0.357405	0.0902583	3.95981	7.50105e-05	0.000954287
Stbd1	364.126	0.463766	0.117173	3.95798	7.55863e-05	0.000960856
Snu13	2153.33	0.302964	0.0765817	3.95609	7.6187e-05	0.00096773
Itch	1612.19	-0.191957	0.0485251	-3.95584	7.62664e-05	0.000967911
Tlk1	2321.89	-0.259834	0.0656864	-3.95567	7.6321e-05	0.000967911
Ndufv2	5658.16	0.425156	0.107517	3.95429	7.67614e-05	0.000972732
Pcdhgb4	216.047	-0.493731	0.124866	-3.95408	7.68284e-05	0.000972818
Lrrc3	1990.95	-0.341777	0.08646	-3.95301	7.71746e-05	0.000976437
Uba3	3164.39	0.260771	0.0659744	3.95261	7.73035e-05	0.000977302
Zfp169	406.964	-0.252737	0.0639717	-3.95077	7.79017e-05	0.000984095
Gsto1	1473.49	0.268822	0.0680494	3.95039	7.80229e-05	0.000984857
Chd5	11653.9	-0.222348	0.056289	-3.95012	7.8111e-05	0.000985199
Mprip	8508.13	-0.316817	0.080243	-3.94822	7.87336e-05	0.000991716
Cbln1	777.836	-0.406268	0.1029	-3.94817	7.87505e-05	0.000991716
Lta4h	1389.34	0.142621	0.0361445	3.94585	7.95164e-05	0.000999025
Cdkl3	652.943	-0.304819	0.0772499	3.94588	7.95074e-05	0.000999025
Ilvbl	1433.88	0.238806	0.0605163	3.94615	7.94188e-05	0.000999025
Mmadhc	1369.89	-0.22401	0.056797	3.94405	8.01162e-05	0.00100578
Smim30	1719.4	0.258214	0.065477	3.94358	8.02741e-05	0.00100698
Tmem131l	1296.91	-0.246229	0.0624443	-3.94317	8.04101e-05	0.0010079
Cbx1	1648.92	-0.213635	0.0541934	-3.94207	8.07799e-05	0.00101175
Lrrn2	4192.52	-0.252226	0.0639935	-3.94143	8.09987e-05	0.00101292
Slc39a3	3888.48	-0.213396	0.05414	-3.94156	8.0955e-05	0.00101292
Wdfy2	195.705	-0.310588	0.0788183	-3.94055	8.12945e-05	0.00101427
Bad	1099.28	0.294221	0.0746605	3.94079	8.12148e-05	0.00101427
Zfp740	1730.13	-0.185519	0.0470787	-3.94062	8.12714e-05	0.00101427
Gpi1	27449	0.495246	0.125708	3.93965	8.15995e-05	0.00101729
Rpl38	4689.62	0.280486	0.0712108	3.93882	8.1885e-05	0.00102006
Abhd12	3791.94	0.132922	0.0337528	3.9381	8.21292e-05	0.00102184
Tle6	53.9754	0.521304	0.132377	3.93803	8.21543e-05	0.00102184
Col5a2	391.918	-0.713788	0.18128	-3.93748	8.23411e-05	0.00102337
Ttc38	121.677	0.413872	0.105128	3.93683	8.25659e-05	0.00102538
Mtr	373.484	-0.443342	0.112637	-3.93604	8.28377e-05	0.00102796
Pias4	720.883	-0.229971	0.0584333	-3.93561	8.2986e-05	0.00102901
Kcnip4	684.982	-0.401597	0.102048	-3.93539	8.30624e-05	0.00102917
Parg	1589.2	-0.170463	0.0433272	-3.93433	8.34306e-05	0.00103294
Stx18	626.799	0.19956	0.050731	3.9337	8.36482e-05	0.00103484
5031439G07Rik	11135	-0.266862	0.0678438	-3.93347	8.37287e-05	0.00103505
2810004N23Rik	516.425	0.191866	0.0487999	3.93168	8.43539e-05	0.00104198
Acsl3	4361.83	0.228353	0.0581022	3.9302	8.48767e-05	0.00104738
Mcee	453.327	-0.345574	0.0879312	3.93006	8.4926e-05	0.00104738
Eno1b	56.2748	0.591458	0.150502	3.92989	8.49859e-05	0.00104738
Rpsa	22291.5	0.231461	0.0589138	3.92882	8.53654e-05	0.00105046
Msrb1	549.591	0.399489	0.101679	3.92891	8.53321e-05	0.00105046
H2-K2	15.6496	1.2689	0.323036	3.92803	8.56438e-05	0.00105308
Gclm	1100.31	0.370498	0.0943484	3.92691	8.60427e-05	0.00105718
Idh3b	5966.97	0.284631	0.0724894	3.92652	8.61833e-05	0.0010581
Nsf	11072.7	-0.242628	0.0617952	-3.92632	8.62547e-05	0.00105818
Eif3e	5625.08	0.311125	0.0792554	3.9256	8.65129e-05	0.00106013
Als2	1641.67	-0.156099	0.0397651	-3.92551	8.6545e-05	0.00106013
Baiap2	2127.94	-0.409405	0.104307	-3.925	8.67304e-05	0.00106159
Ncam1	26501.4	-0.227297	0.0579332	-3.92343	8.7297e-05	0.00106772
Dph1	321.845	0.251411	0.0640831	3.9232	8.73816e-05	0.00106795
Phc2	2034.84	-0.295631	0.0754135	-3.92014	8.84982e-05	0.00108078
Shc4	278.661	-0.693212	0.176907	-3.9185	8.91006e-05	0.00108675
Map7d2	3864.67	0.416371	0.106259	3.91845	8.91216e-05	0.00108675
Cant1	1922.72	-0.180246	0.046005	-3.91797	8.92967e-05	0.00108806
Prdx3	3611.78	0.326855	0.0834295	3.91774	8.93847e-05	0.00108831
Ift81	1715.86	0.315549	0.0805622	3.91683	8.97204e-05	0.00109122
Atp2c1	5507.54	-0.259745	0.0663169	-3.91673	8.9759e-05	0.00109122
Gle1	2117.5	-0.197574	0.0504494	-3.91628	8.99256e-05	0.00109243
Igfbp2	1237.03	0.44947	0.114789	3.91562	9.01711e-05	0.00109459
Rps20	6240.75	0.278345	0.0710934	3.9152	9.0329e-05	0.00109568
Nipbl	2124.08	-0.230947	0.0590061	-3.91395	9.07974e-05	0.00109971
Pnma1	162.376	-0.365657	0.0934203	-3.91411	9.07381e-05	0.00109971
Lyrm4	650.876	0.342507	0.0875279	3.91312	9.11113e-05	0.00110269
Tuba1b	8326.36	0.393278	0.100514	3.91266	9.12863e-05	0.00110398
Gipc1	1611.89	0.367811	0.0940278	3.91173	9.16385e-05	0.00110741
Nudcd2	571.926	0.280275	0.0716597	3.9112	9.18392e-05	0.001109
Ehd4	314.622	0.56257	0.14386	3.91053	9.20943e-05	0.00111125
Ksr1	1292.37	-0.22213	0.0568102	-3.91004	9.22792e-05	0.00111265
Rere	2916.97	-0.28145	0.0720018	-3.90894	9.27032e-05	0.00111616
Jph1	470.316	-0.347161	0.0888128	-3.9089	9.2716e-05	0.00111616
Hectd4	13150.7	-0.243516	0.0623004	-3.90874	9.27777e-05	0.00111616
Rps10	3986.42	0.219032	0.056039	3.90856	9.28465e-05	0.00111616
Nbr1	5415.16	-0.210982	0.0539819	-3.90837	9.29198e-05	0.00111621
Gtf3c1	4529.93	-0.216413	0.0553809	-3.90772	9.31718e-05	0.00111723
Kcnh5	226.904	-0.459013	0.117457	-3.90793	9.30919e-05	0.00111723
Alg10b	2772.46	-0.238091	0.0609329	-3.90743	9.32812e-05	0.00111723
Rpl39	3659.1	0.291802	0.0746781	3.90747	9.32681e-05	0.00111723
Nsd3	3588.41	-0.282589	0.0723359	-3.90662	9.35962e-05	0.00112017
St8sia4	3320.16	0.336596	0.0861684	3.90625	9.37388e-05	0.00112105
Pef1	1119.14	-0.379501	0.0971656	-3.90571	9.39472e-05	0.00112105
Dph5	314.333	0.232718	0.0595797	3.906	9.38384e-05	0.00112105
Foxo4	108.511	-0.540575	0.138406	-3.90572	9.3946e-05	0.00112105
Nampt	3703.51	0.362631	0.0928623	3.90504	9.42082e-05	0.00112251
Ddx59	258.817	-0.305423	0.0782122	-3.90505	9.42055e-05	0.00112251
Bicral	1137.37	-0.275084	0.0704717	-3.90347	9.48246e-05	0.00112902
Asphd2	2086.49	-0.120684	0.030926	-3.90234	9.5268e-05	0.0011318
Ebp	426.625	0.252591	0.0647259	3.90248	9.52121e-05	0.0011318
Cd302	106.96	0.51428	0.131776	3.90268	9.51322e-05	0.0011318
Trappc6a	520.339	0.386945	0.0991781	3.90152	9.55909e-05	0.0011348
B3gat3	4502.19	0.258282	0.0662197	3.90037	9.60445e-05	0.00113935
Poll	297.839	0.22715	0.0582486	3.89966	9.63277e-05	0.00114187
Ap1s1	6401.56	0.251965	0.0646176	3.89932	9.64616e-05	0.00114262
Lrp8	4695.34	-0.387023	0.0992868	-3.89803	9.69791e-05	0.00114791
Mical2	2257.6	-0.465695	0.119477	-3.89779	9.70751e-05	0.0011482
Fnta	2010.77	0.307372	0.0788774	3.89683	9.74581e-05	0.00115167
Prr18	472.323	-0.337514	0.0866154	-3.8967	9.75108e-05	0.00115167
Nup160	1009.04	-0.251861	0.0646374	-3.89652	9.75844e-05	0.0011517
Cyfip2	11784.7	-0.241467	0.0619801	-3.89588	9.78421e-05	0.00115389
Scml4	281.282	-0.519498	0.133363	-3.89537	9.80492e-05	0.00115549
Atp5j	4443.42	0.291216	0.074769	3.89487	9.8251e-05	0.00115676
Tmem47	2165.1	0.342476	0.0879327	3.89475	9.83001e-05	0.00115676
Gm27217	19.4751	-0.974166	0.250171	-3.89399	9.86077e-05	0.00115954
Fkbp4	6201.77	0.123782	0.0317936	3.89329	9.88922e-05	0.00116204
P4ha1	1560.78	0.446572	0.114717	3.8928	9.90936e-05	0.00116313
Cep126	240.481	0.320735	0.0823937	3.89271	9.91294e-05	0.00116313
B3gat2	512.492	-0.314745	0.0808596	-3.89248	9.92238e-05	0.0011634
Rps15	9360.83	0.26279	0.0675342	3.89121	9.9746e-05	0.00116867
Orai2	2114.78	-0.255328	0.0656397	3.88985	0.000100308	0.0011744
Itm2a	603.763	0.654524	0.168286	3.88937	0.000100507	0.00117588
2700097O09Rik	273.423	0.384145	0.0987915	3.88844	0.000100889	0.0011795
Bag2	733.593	-0.338854	0.0871561	3.8879	0.000101116	0.0011813
Celf2	16143.6	-0.390318	0.100461	-3.88528	0.000102214	0.00119153
Cacng4	4174.49	-0.228857	0.058902	-3.88539	0.000102167	0.00119153
Telo2	1615.49	0.146104	0.0376023	3.8855	0.000102118	0.00119153
Rara	387.833	-0.427988	0.110204	-3.88358	0.000102928	0.001199
Tpgs2	2377.95	-0.254497	0.0655376	3.88322	0.000103082	0.00119993
4833439L19Rik	4693.41	0.277544	0.0715181	3.88075	0.000104134	0.0012113
Fbxw7	4433.32	-0.344784	0.0888536	-3.88036	0.000104301	0.00121157
Ctif	3550.82	-0.308944	0.0796177	-3.88035	0.000104308	0.00121157
Dsc1	87.2417	0.639961	0.164933	3.88013	0.000104401	0.00121179
Pfkl	8527.21	0.576403	0.148576	3.87952	0.000104663	0.00121396
Gtf2f2	607.527	0.26073	0.0672397	3.87762	0.000105482	0.00122258
Dnttip1	467.632	0.167175	0.0431177	3.87717	0.00010568	0.00122399
Farsb	3086.9	0.168812	0.043544	3.87681	0.000105836	0.00122492
Pttg1	493.923	0.367439	0.0948247	3.87493	0.000106656	0.00123177
Nt5m	1172.07	-0.295522	0.0762652	-3.87493	0.000106656	0.00123177
Gsk3a	4439.14	-0.139647	0.0360375	-3.87505	0.000106604	0.00123177
Slc44a1	596.952	-0.411976	0.106335	-3.87433	0.00010692	0.00123394
Akirin1	2135.06	-0.303886	0.0784545	3.87341	0.000107325	0.00123772
Kifap3	15184.2	0.183593	0.0474049	3.87287	0.000107561	0.00123956
Faap100	3509.8	-0.294246	0.0759859	-3.87238	0.000107776	0.00124115
Htt	4863.4	-0.316312	0.0816973	-3.87176	0.000108054	0.00124347
Nup188	1128.8	-0.20237	0.0522782	-3.87103	0.000108377	0.00124553
Fancm	392.235	-0.189801	0.0490314	-3.87101	0.000108387	0.00124553
Rps18	8087.21	0.326714	0.0844099	3.87057	0.000108583	0.00124689
Gkap1	616.447	0.329632	0.0851893	3.8694	0.000109102	0.0012493
Gpatch8	1831.11	-0.251085	0.0648898	-3.86941	0.000109099	0.0012493
Sugp2	5204.22	-0.148	0.0382461	-3.86967	0.000108983	0.0012493
Wnk2	3932.89	-0.375975	0.0971538	-3.86989	0.000108883	0.0012493
Dhx32	1816.46	-0.155971	0.0403166	-3.86866	0.000109434	0.00125222
Pak5	1767.76	0.284356	0.073508	3.86837	0.000109565	0.00125282
Afdn	4524.23	-0.391735	0.101279	-3.86789	0.000109783	0.00125443
Macf1	20781.6	-0.296438	0.0766443	-3.86771	0.000109863	0.00125446
Sult4a1	10614	0.227482	0.0588239	3.86717	0.000110106	0.00125634
Jazf1	2548.23	-0.484956	0.125448	-3.86578	0.000110734	0.00126262
Maml2	100.921	-0.374132	0.0967873	-3.86551	0.000110858	0.00126314
Septin2	2390.98	0.255364	0.0661047	3.86302	0.000111993	0.00127517
Prune2	861.32	0.300594	0.077853	3.86104	0.000112905	0.00128465
Tmem108	814.455	-0.343342	0.0889325	-3.8607	0.000113064	0.00128556
Wdr48	3289.09	-0.175841	0.0455496	-3.86043	0.000113189	0.00128607
Atxn7l1	926.562	-0.273075	0.0707698	-3.85863	0.000114024	0.00129465
A730056A06Rik	65.4943	-0.536399	0.139048	-3.85765	0.000114481	0.00129892
Tle3	1904.27	-0.36062	0.0934948	-3.85711	0.000114734	0.00130088
Appl2	617.737	0.414016	0.107358	3.85641	0.000115063	0.0013037
Kat6b	2037.86	-0.260369	0.0675203	-3.85615	0.000115185	0.00130417
Zmynd19	1852.01	-0.19954	0.0517604	-3.85507	0.000115698	0.00130905
Uqcrc2	8689.76	0.296162	0.0768427	3.85413	0.00011614	0.00131229
Slc35g2	532.848	-0.530161	0.137557	3.85412	0.000116146	0.00131229
Bccip	1082.48	0.275737	0.0715484	3.85386	0.000116272	0.0013128
Kcnk2	1766.95	-0.372185	0.0966158	-3.85221	0.000117055	0.00132071
Megf10	180.688	0.497272	0.129205	3.84871	0.000118741	0.0013388
Akap17b	1008.97	0.305924	0.0794971	3.84824	0.00011897	0.00134045
Faim2	2771.17	-0.25846	0.0671949	-3.84643	0.000119852	0.00134944
Clip2	6756.37	-0.330824	0.0860184	-3.84597	0.000120077	0.00135103
Rps14	9212.05	0.344753	0.0896595	3.84514	0.000120484	0.00135467
Mdh1	30441.1	0.353258	0.0918803	3.84476	0.00012067	0.00135558
Zfp110	1010.02	0.281128	0.0731222	3.84463	0.000120733	0.00135558
Slc44a2	1049.78	-0.406116	0.105674	-3.8431	0.000121492	0.00136316
Pgap4	3128.08	-0.160845	0.0418659	-3.84192	0.000122077	0.00136877
Fubp1	4244.27	-0.456233	0.118758	-3.84169	0.000122188	0.00136906
Ngf	118.746	-0.473252	0.123272	-3.8391	0.000123484	0.00138216
Col25a1	1150.13	-0.369342	0.0962076	-3.83902	0.000123528	0.00138216
2810049E08Rik	145.179	0.319988	0.0833636	3.83847	0.000123806	0.00138431
Glb1l	197.883	-0.289378	0.075399	-3.83796	0.000124063	0.00138526
Tulp4	6193.48	-0.340546	0.0887307	-3.83797	0.000124057	0.00138526
Gigyf1	1307.24	-0.194599	0.0507301	-3.83596	0.000125073	0.00139559
Ppp2r2b	7408.44	-0.30098	0.0784703	-3.8356	0.00012526	0.0013967
Tug1	4697.56	-0.297329	0.0775371	-3.83467	0.000125734	0.00140102
Ndufs7	2006.08	0.24778	0.0646193	3.83445	0.000125844	0.00140129
Sars	7593.89	0.243945	0.063645	3.8329	0.000126642	0.0014092
Ero1b	415.699	-0.30905	0.0806625	-3.83139	0.000127419	0.00141687
Sgtb	3972.03	0.368585	0.0962094	3.83107	0.000127589	0.00141778
Smchd1	1994.54	-0.224426	0.058596	-3.83006	0.000128114	0.00142264
Mllt11	19580.5	-0.149645	0.0390784	-3.82934	0.000128489	0.00142582
Recql	584.382	-0.178467	0.0466318	-3.82714	0.00012964	0.00143761
Spaar	70.0434	-0.556001	0.145411	-3.82366	0.000131487	0.00145709
Wdr1	7554.2	-0.168984	0.0442018	-3.82301	0.000131834	0.00145993
Mrps36	521.327	0.247632	0.0647992	3.82153	0.000132626	0.0014677
Prkd1	195.463	-0.412663	0.108005	-3.82079	0.000133024	0.00147109
Masp1	469.801	-0.29976	0.0784682	3.82015	0.000133373	0.00147394
Gm14018	29.3649	-0.682661	0.17876	-3.81886	0.000134067	0.00148061
Mroh5	12.0174	-1.19389	0.31271	-3.81789	0.000134597	0.00148544
Ppp4r4	357.122	-0.283867	0.0743829	-3.8163	0.000135471	0.00149311
Grsf1	2941.65	0.185762	0.0486761	3.81628	0.000135477	0.00149311
Med4	965.782	-0.224382	0.0588047	-3.81571	0.000135791	0.00149555
Pcdhb20	586.482	-0.234729	0.0615219	-3.81537	0.000135981	0.00149662
Tox4	3059.01	-0.162988	0.0427287	-3.8145	0.000136459	0.00149966
Abcb10	1010.96	0.535372	0.140363	3.81421	0.00013662	0.00149966
Zfp143	349.63	-0.222683	0.0583755	-3.81467	0.000136367	0.00149966
Utp3	989.76	0.192648	0.0505081	3.81419	0.000136628	0.00149966
Mrps33	523.009	0.329721	0.086455	3.81379	0.000136854	0.00150112
Cnot8	1787.56	-0.189568	0.0497233	-3.81247	0.000137587	0.00150712
Mllt1	4072.87	-0.329293	0.0863704	-3.81257	0.000137531	0.00150712
Zfand2b	781.313	0.241727	0.0634216	3.81142	0.000138169	0.00151052
Tor1b	899.924	-0.228524	0.0599606	-3.81124	0.000138272	0.00151052
Tmem126b	1237.79	-0.360319	0.0945378	3.81138	0.000138195	0.00151052
Nrep	33751.5	-0.400371	0.105039	-3.81166	0.000138038	0.00151052
Pla2g6	570.854	-0.280709	0.0736575	-3.811	0.000138407	0.00151098
Adi1	198.183	-0.545832	0.143252	-3.81028	0.000138808	0.00151409
Rsu1	1185	-0.230323	0.0604498	-3.81015	0.00013888	0.00151409
Eif3i	3693.01	0.194502	0.051061	3.80922	0.000139407	0.00151881
Fam163b	3186.95	-0.269354	0.0707408	-3.80763	0.000140308	0.0015276
Mpnd	2357.59	0.16675	0.0437963	3.80739	0.000140439	0.001528
Kl	12.0558	-1.12547	0.295761	-3.80534	0.000141612	0.00153972
Tatdn1	591.48	0.252894	0.0664908	3.80345	0.000142695	0.00155045
Sat1	738.898	0.344643	0.0906352	3.80253	0.000143226	0.00155334
Vstm5	462.458	0.413421	0.108721	3.80259	0.000143194	0.00155334
Adra2c	312.271	-0.31239	0.0821542	-3.80249	0.00014325	0.00155334
Dnph1	152.07	0.646973	0.170171	3.8019	0.000143592	0.00155602
Il1rapl1	716.689	0.260664	0.0685681	3.80154	0.0001438	0.00155722
Crybg1	15.0222	-0.678971	0.178615	-3.8013	0.000143938	0.00155767
Thumpd2	81.4132	0.360019	0.0947234	3.80074	0.000144264	0.00156016
Rab5c	5542.4	0.266847	0.0702204	3.80013	0.000144618	0.00156294
Tbr1	1507.97	-0.56384	0.148403	-3.79938	0.00014506	0.00156667
Arid4a	948.986	-0.175762	0.0462814	-3.79767	0.000146061	0.00157642
Kmt2a	4018.61	-0.219039	0.0576985	-3.79626	0.000146895	0.00158331
Amelx	34.6529	-5.14087	1.35419	3.79628	0.000146885	0.00158331
Ssb	5557.73	0.300744	0.0792498	3.79489	0.000147709	0.00159102
A830018L16Rik	5134.03	-0.2618	0.0689955	-3.79445	0.000147972	0.00159279
Cat	1756.12	0.233438	0.0615367	3.79348	0.000148552	0.00159797
Txndc17	2245.51	-0.306664	0.0808569	3.79268	0.00014903	0.00160205
Grm7	1547.9	-0.230905	0.0608847	-3.7925	0.000149139	0.00160216
Api5	2505.99	-0.284457	0.0750285	-3.79132	0.000149847	0.00160869
Pex7	662.767	-0.305523	0.0805895	3.7911	0.000149984	0.00160909
Igsf9b	997.447	-0.402337	0.106144	-3.79048	0.000150357	0.00161203
Elavl1	2398.58	-0.243974	0.0643872	-3.78917	0.00015115	0.00161945
Dbnl	4111.68	0.206787	0.0545791	3.78876	0.000151399	0.00161997
Thnsl2	71.902	0.440792	0.11634	3.78884	0.00015135	0.00161997
Atp5j2	5884.51	0.312295	0.0824535	3.78753	0.000152153	0.00162696
Nup205	1475.45	-0.215587	0.0569304	-3.78686	0.000152566	0.00163029
Tead1	435.605	-0.497638	0.13142	-3.78662	0.000152712	0.00163078
Pomc	25.2655	0.560745	0.148101	3.78622	0.000152954	0.00163229
Ptp4a1	2069.11	-0.343102	0.0906253	-3.78594	0.00015313	0.00163308
Tpx2	147.883	-0.511769	0.135189	-3.78557	0.000153359	0.00163429
Eif5a	13413	0.134772	0.0356029	3.78543	0.000153445	0.00163429
Slc25a24	57.3549	0.68942	0.182154	3.78481	0.000153826	0.00163727
Uqcr11	4647.24	0.286337	0.0757003	3.78251	0.000155257	0.00165032
Plekha7	360.225	-0.218884	0.057867	-3.78253	0.000155239	0.00165032
Degs1	1732.44	0.169028	0.0446973	3.78163	0.000155808	0.00165509
Cwf19l2	587.198	0.244109	0.0645627	3.78096	0.000156224	0.00165842
Ep400	2834.97	-0.232429	0.0614811	-3.78049	0.000156517	0.00165935
Cask	6467.66	-0.126631	0.0334957	-3.78052	0.000156499	0.00165935
Gm15559	68.747	-0.619618	0.163909	-3.78026	0.000156664	0.00165981
Scn11a	8.93679	-1.03705	0.27445	-3.77866	0.000157677	0.00166945
Ppp1r3d	494.388	-0.734874	0.194501	3.77825	0.000157936	0.0016711
Ddx25	3189.92	0.207211	0.0548601	3.77707	0.000158681	0.00167789
Tmem43	1812.87	0.196944	0.0521458	3.77679	0.000158861	0.00167869
L1cam	21314.1	-0.296603	0.0785405	-3.77643	0.00015909	0.00168001
Gna13	1241.36	-0.43335	0.114768	-3.77588	0.000159441	0.00168261
Tmem205	803.045	0.318124	0.0842604	3.77549	0.000159692	0.00168416
Rassf8	267.128	0.299749	0.0794026	3.77505	0.000159973	0.00168496
Nek3	105.794	-0.499794	0.132394	-3.77505	0.000159976	0.00168496
Krt10	166.32	-0.382656	0.101402	-3.77365	0.000160877	0.00169301
Parpbp	29.0178	-0.679269	0.180009	-3.77354	0.00016095	0.00169301
Cldn1	89.6943	-0.732972	0.194275	-3.77287	0.000161383	0.00169646
Hspd1	7418.95	0.290121	0.0769173	3.77186	0.000162035	0.00170221
Nckap5l	967.004	-0.262967	0.0697675	-3.76919	0.000163777	0.00171939
Galnt11	2079.97	0.329554	0.0874505	3.76846	0.000164258	0.00172332
Lypla2	2774.92	0.340073	0.0902681	3.76737	0.000164977	0.00172975
Nrde2	366.719	-0.262949	0.0698051	-3.7669	0.000165284	0.00173184
Fam241b	1435.85	-0.606854	0.16115	-3.76577	0.000166034	0.00173857
Dlg2	14061.2	-0.195514	0.0519231	-3.76545	0.000166252	0.00173973
Fam136a	1997.3	0.406742	0.108042	3.76468	0.000166764	0.00174282
Gm30502	1997.3	0.406742	0.108042	3.76468	0.000166764	0.00174282
Ints5	909.087	-0.143219	0.0380692	-3.76208	0.000168508	0.00175991
Garnl3	1999.99	-0.264297	0.0702587	-3.76177	0.000168713	0.00176091
Mrpl51	1257.46	0.20129	0.053521	3.76095	0.000169272	0.00176561
Plekha1	2941.92	-0.19052	0.0506674	-3.76021	0.000169768	0.00176964
Hace1	953.619	-0.309581	0.082344	-3.75961	0.000170178	0.00177277
Ino80d	1431.84	-0.291056	0.077443	-3.75833	0.000171055	0.00178075
Clpx	1154.48	0.225718	0.0600629	3.75802	0.00017126	0.00178175
Mmp16	2432.66	0.229889	0.0611878	3.7571	0.000171894	0.00178719
Wbp4	2308.12	0.17499	0.0465782	3.75691	0.000172022	0.00178737
Armc1	3016.27	-0.204876	0.0545359	-3.75672	0.000172158	0.00178763
Gcg	11.2596	0.835455	0.222451	3.75569	0.000172865	0.00178853
Nptxr	12304.4	-0.2119	0.056422	-3.75563	0.000172909	0.00178853
Psd4	22.1803	-0.674641	0.17961	-3.75614	0.000172555	0.00178853
Susd1	325.557	0.331447	0.0882503	3.75576	0.000172818	0.00178853
Hrh3	213.531	-0.722866	0.192436	-3.75639	0.000172384	0.00178853
Lrp1	14746.3	-0.269784	0.0718277	-3.75599	0.000172659	0.00178853
Kifc2	7187.69	0.260434	0.0693848	3.75348	0.000174399	0.0018028
Clrn1	29.8408	-0.790003	0.210506	-3.75287	0.00017482	0.00180598
Rassf6	20.5092	0.707993	0.188675	3.75246	0.000175111	0.00180784
Akr7a5	472.162	0.296722	0.0790808	3.75213	0.000175335	0.001809
Gabrb2	4815.72	-0.337837	0.0900502	-3.75166	0.00017567	0.00181129
Tm7sf2	1231.06	0.535058	0.142642	3.75105	0.000176093	0.00181381
Abhd17b	1426.5	-0.260805	0.0695297	-3.75099	0.000176138	0.00181381
Zbtb43	1364.14	-0.175129	0.0466981	-3.75024	0.000176669	0.00181811
Lpin1	668.512	0.261188	0.0696545	3.74976	0.000177005	0.00181996
Rpl28	3168.49	0.244899	0.0653122	3.74966	0.000177073	0.00181996
Creg1	800.137	0.190709	0.0508683	3.74907	0.000177493	0.00182311
Nudcd3	6205.02	0.22261	0.0593923	3.74812	0.000178162	0.00182876
Tonsl	3617.91	0.252891	0.0674741	3.74797	0.000178269	0.00182876
Mpc2	1973.7	0.266569	0.0711377	3.74722	0.000178805	0.00183201
Zcchc4	290.197	-0.196818	0.0525238	-3.74721	0.000178813	0.00183201
Acad11	523.692	0.36114	0.0963933	3.74652	0.000179302	0.00183585
Ets2	1416.51	-0.242777	0.0648195	-3.74543	0.000180087	0.00184204
Arhgap32	5555.3	-0.396205	0.105785	-3.74536	0.000180134	0.00184204
Usp24	4661.35	-0.268022	0.071567	-3.74505	0.000180355	0.00184314
Mrnip	228.632	-0.433851	0.115861	3.74458	0.000180699	0.00184548
Gabpb2	222.627	0.32164	0.0859077	3.74401	0.000181103	0.00184844
Daglb	778.231	0.231015	0.0617083	3.74367	0.000181353	0.00184982
Cct4	6862.32	0.189488	0.0506196	3.74338	0.00018156	0.00185077
Elk3	78.5408	-0.503836	0.1346	-3.74321	0.000181685	0.00185088
Pycr1	434.984	0.303892	0.0811904	3.74296	0.000181866	0.00185155
Tmem9	3136.9	0.190693	0.050953	3.74253	0.000182179	0.00185357
Pot1a	870.07	0.365663	0.0977148	3.74214	0.000182457	0.00185406
Gpr55	15.7189	-0.832201	0.222382	-3.74221	0.00018241	0.00185406
Cdca7	150.19	0.382539	0.102235	3.74176	0.000182735	0.00185572
Zmat3	4826.93	0.321036	0.0858041	3.7415	0.000182928	0.00185651
Lss	3350.43	0.421225	0.112605	3.74073	0.000183486	0.00186101
Psmd4	4103.52	0.279669	0.0747996	3.73892	0.000184814	0.0018733
Epn3	13.9015	0.800638	0.214148	3.73871	0.000184965	0.00187365
Ddt	171.428	0.330166	0.0883333	3.73774	0.000185685	0.00187507
Fbxw11	5315	-0.164143	0.0439135	-3.73788	0.000185577	0.00187507
Chst10	2502.66	-0.194334	0.0519896	-3.73794	0.000185534	0.00187507
Cmtm6	341.357	-0.528634	0.141421	3.73801	0.00018548	0.00187507
Klhdc8a	699.467	-0.364576	0.0975343	-3.73793	0.000185541	0.00187507
Mapt	70641.1	0.247093	0.066133	3.7363	0.000186746	0.00188461
2500004C02Rik	120.622	-0.651245	0.174359	-3.73508	0.000187654	0.00189259
Carmil1	1501.06	-0.185416	0.0496471	-3.73467	0.00018796	0.00189348
Pcdhga7	446.66	-0.447241	0.119754	-3.73465	0.000187977	0.00189348
Cyren	53.1963	-0.431049	0.115486	-3.73246	0.000189619	0.00190884
Zfp536	1603.64	-0.486837	0.130467	-3.73149	0.000190349	0.00191499
Uqcr10	4335.35	0.27578	0.073916	3.73099	0.000190725	0.00191758
Nol10	776.796	0.343694	0.0921276	3.73064	0.000190997	0.00191912
Asxl3	1903.31	-0.265796	0.071253	-3.73031	0.000191242	0.00192039
Pex1	750.567	-0.18482	0.049548	-3.73011	0.000191394	0.00192072
Vgll4	1452.42	-0.19365	0.0519201	-3.72976	0.000191659	0.00192218
Dnajc27	3858.83	0.198763	0.0532974	3.72933	0.000191992	0.00192433
Gpn1	1281.4	0.179641	0.0481764	3.72881	0.000192388	0.0019271
Cxxc5	372.082	-0.354932	0.0952113	-3.72784	0.000193129	0.00193333
Adamtsl2	227.631	-0.353688	0.0949028	-3.72685	0.000193888	0.00193852
Kcnb1	2638.07	-0.294774	0.0790946	-3.72685	0.000193888	0.00193852
Pcdhb7	604.332	-0.245367	0.0658514	-3.72608	0.000194484	0.00194328
Kdm7a	704.223	0.651566	0.174984	3.72357	0.000196423	0.00196144
Camsap2	6516.04	-0.172726	0.0464137	-3.72145	0.000198086	0.00197682
Spata24	75.3329	0.557489	0.149818	3.7211	0.000198356	0.00197829
Meaf6	4280.24	0.198259	0.0532834	3.72083	0.000198567	0.00197918
Sp2	315.893	-0.380284	0.102229	-3.71993	0.000199275	0.00198257
Ypel4	536.444	-0.277018	0.0744676	-3.71998	0.000199237	0.00198257
Repin1	673.356	0.192781	0.0518204	3.72019	0.000199077	0.00198257
Ell2	524.915	-0.550427	0.148004	-3.71901	0.000200003	0.00198689
Ndufa5	2229.11	0.342138	0.0919988	3.71894	0.000200059	0.00198689
Mmachc	735.556	0.158633	0.0426561	3.71889	0.000200103	0.00198689
Gprasp1	24601.2	-0.24413	0.0656482	-3.71876	0.000200201	0.00198689
Gpr89	1111.14	0.195956	0.0527149	3.71727	0.000201386	0.00199741
Hspa4	11757.4	0.229287	0.0616941	3.71652	0.000201989	0.00200217
Klf7	2538.93	-0.273603	0.0736604	-3.71439	0.000203694	0.00201537
Tmc7	469.84	-0.40455	0.108914	-3.71439	0.000203695	0.00201537
Sdhaf1	155.153	0.538299	0.144912	3.71467	0.00020347	0.00201537
Lancl1	6169.44	0.232397	0.0625937	3.71279	0.000204984	0.00202441
Aimp1	2094.5	0.315594	0.0849982	3.71295	0.000204858	0.00202441
Naif1	180.99	-0.335314	0.0903131	-3.71279	0.000204985	0.00202441
Fhip1b	2544.7	-0.198622	0.0535011	-3.71248	0.000205238	0.00202568
Cdc42ep4	1763.1	-0.310695	0.083722	-3.71104	0.000206413	0.00203603
1500009L16Rik	534.16	-0.31252	0.0842257	-3.7105	0.000206847	0.00203907
Gemin2	241.411	-0.408416	0.110081	3.71013	0.000207152	0.00204082
Bnip1	930.357	0.159506	0.0429964	3.70976	0.00020746	0.00204261
Sh3bp5	2531.8	-0.262358	0.0707271	-3.70945	0.000207712	0.00204352
Hspbap1	242.89	-0.254701	0.068665	-3.70933	0.000207804	0.00204352
Rgcc	57.7748	0.581578	0.156803	3.70897	0.000208101	0.00204394
Anp32a	5888.75	-0.296116	0.0798368	3.70902	0.000208062	0.00204394
Slc2a1	1200.67	0.704174	0.189898	3.70816	0.000208768	0.00204925
Frmd8	304.772	-0.2609	0.0703669	-3.70771	0.00020914	0.00205041
Kmt2d	3046.43	-0.274389	0.0740036	-3.70778	0.000209082	0.00205041
Ctso	135.383	-0.492563	0.132886	3.70666	0.000210014	0.00205773
Lonrf2	9109.06	-0.259322	0.0699826	-3.70552	0.000210959	0.00206573
Tatdn3	415.765	0.209939	0.0566583	3.70535	0.000211101	0.00206587
Gng13	97.6101	0.516936	0.139551	3.70429	0.000211983	0.00207325
Ccnj	378.422	-0.216076	0.0583634	-3.70225	0.000213696	0.00208874
Miga2	2350.96	0.193661	0.0523186	3.70156	0.000214275	0.00209313
Mrpl21	1038.58	0.207908	0.0561746	3.70111	0.000214655	0.00209558
Prpf18	1779.99	-0.141615	0.038277	-3.69976	0.000215807	0.00210555
Cops8	2431	-0.128412	0.0347125	-3.69929	0.000216201	0.00210812
Nars	8622.7	0.478184	0.129297	3.69833	0.000217019	0.00211355
Ppia	25210.1	0.335622	0.090747	3.69843	0.000216936	0.00211355
Arrdc1	569.033	0.236413	0.0639326	3.69785	0.000217432	0.00211502
Clnk	17.1096	-0.678947	0.183604	-3.69789	0.000217399	0.00211502
Cln3	448.34	-0.269554	0.0729105	-3.69705	0.000218117	0.00212041
D2hgdh	298.084	0.276559	0.0748529	3.69469	0.000220153	0.00213892
Zfp317	1289	-0.244435	0.0661842	3.69326	0.000221402	0.00214975
Atp4a	97.3075	0.558826	0.151381	3.69151	0.000222927	0.00216214
Micu3	2938.45	0.212591	0.0575894	3.69149	0.000222945	0.00216214
Naca	5838.14	0.330982	0.0896713	3.69106	0.000223319	0.00216447
Farp2	159.172	0.331812	0.0899405	3.68924	0.000224925	0.00217742
Lor	106.178	-0.35139	0.0952437	-3.68937	0.000224807	0.00217742
Cntn2	2109.62	-0.285487	0.0774009	-3.68841	0.000225656	0.00218318
Jdp2	422.696	-0.304633	0.0826019	-3.68797	0.00022605	0.00218569
Ext1	1834.79	-0.235873	0.0639617	-3.68772	0.000226273	0.00218654
Prrt3	809.418	-0.185621	0.0503447	-3.68701	0.000226902	0.0021913
Rpl37	5070.8	0.298622	0.0810296	3.68534	0.000228394	0.00220309
Rpl37rt	5070.8	0.298622	0.0810296	3.68534	0.000228394	0.00220309
Ing2	432.405	0.304112	0.0825369	3.68456	0.000229101	0.00220859
Gm16270	4.73743	-1.95453	0.530511	-3.68424	0.000229383	0.00220998
Plscr3	556.624	-0.192283	0.0522315	-3.68136	0.000231992	0.00223246
Ccdc71	1762.02	-0.191962	0.0521425	-3.68148	0.00023188	0.00223246
Chmp1b	753.298	-0.349337	0.0949059	-3.68088	0.000232433	0.00223537
Sptan1	52101	-0.159846	0.0434347	-3.68014	0.000233102	0.00224047
Tmem241	358.441	0.188912	0.0513445	3.67931	0.000233869	0.0022465
Nipsnap2	1461.72	-0.203029	0.0551863	-3.67896	0.000234183	0.00224819
M6pr	1602.12	0.181442	0.0493259	3.67844	0.000234661	0.0022511
Ip6k1	7904.98	-0.115424	0.0313795	-3.67833	0.000234766	0.0022511
Gatd3a	2602.54	0.220436	0.0599337	3.678	0.000235066	0.00225265
Rab9	730.805	0.233002	0.0633658	3.67709	0.000235913	0.00225942
2900009J06Rik	45.3981	-1.06731	0.290547	-3.67345	0.000239294	0.00229044
Prcc	1615.29	0.258184	0.070292	3.67303	0.000239695	0.00229292
Bpnt1	1674.15	0.359416	0.0978769	3.67212	0.00024055	0.00229838
Htra2	814.176	0.212223	0.0577912	3.67223	0.00024044	0.00229838
Amd1	982.919	0.158603	0.0431969	3.67163	0.000241011	0.00230143
Mcrip2	444.864	0.471303	0.12838	3.67116	0.000241457	0.00230432
Shisal1	2051.67	-0.387621	0.105598	-3.67073	0.00024186	0.0023068
Crmp1	38395.4	-0.213215	0.0580932	-3.67022	0.000242341	0.00230756
Rdx	2045.54	0.20799	0.0566697	3.67021	0.000242356	0.00230756
Tacc1	2245.49	-0.314703	0.0857456	-3.67019	0.000242367	0.00230756
Pafah2	317.597	0.18146	0.0494461	3.66985	0.00024269	0.00230927
Csnk1g3	2743.56	-0.163553	0.0445702	-3.66956	0.000242965	0.00231053
Npc1	896.394	-0.288231	0.0785543	-3.66919	0.000243317	0.00231251
Taf1c	412.968	-0.251572	0.0685815	-3.66822	0.000244249	0.00232
Ttc12	19.4456	0.845375	0.230502	3.66754	0.000244896	0.00232479
Rpn2	4849.55	0.178641	0.0487158	3.66701	0.0002454	0.00232745
Fhip1a	78.8592	-0.479339	0.130719	-3.66695	0.000245465	0.00232745
Sppl2b	1786.09	-0.281311	0.0767385	-3.66584	0.000246527	0.00233478
Akr1e1	1089.66	0.261513	0.0713374	3.66586	0.00024651	0.00233478
Ak4	1611.8	0.813075	0.221825	3.6654	0.000246955	0.00233746
Dhrs7	320.068	0.51837	0.141568	3.66162	0.000250626	0.00237082
Cln6	199.311	0.30088	0.0821794	3.66126	0.000250981	0.00237279
3632454L22Rik	69.5258	0.526362	0.143773	3.66106	0.000251171	0.0023732
Rpl26	7418.04	0.290363	0.0793165	3.66082	0.000251412	0.00237409
Ptpn3	479.283	-0.27841	0.0760638	-3.66022	0.000252	0.00237686
Tnrc6a	3005.81	-0.295085	0.0806188	-3.66026	0.000251962	0.00237686
Parva	1121.39	-0.491843	0.134386	-3.65993	0.000252287	0.00237818
Sord	838.084	-0.514548	0.140606	3.65951	0.000252695	0.00238001
Txlng	432.655	0.311746	0.0851897	3.65943	0.000252775	0.00238001
Slc25a5	5195.65	0.267549	0.0731557	3.65725	0.000254931	0.00239534
Pfkfb2	739.5	-0.200983	0.0549555	-3.65719	0.000254997	0.00239534
Iftap	951.568	0.381263	0.104242	3.65749	0.000254701	0.00239534
Csk	2723.8	0.126158	0.0344938	3.6574	0.000254782	0.00239534
Trpc5	388.829	-0.51935	0.142048	-3.65615	0.000256032	0.0023997
Haus1	242.976	-0.430751	0.11781	3.65631	0.000255874	0.0023997
Cited1	122.105	0.579976	0.158613	3.65655	0.000255633	0.0023997
Impdh2	1826.18	-0.286716	0.0784207	3.65613	0.000256055	0.0023997
Mlxip	1588.92	-0.311713	0.0853094	-3.65391	0.000258282	0.00241916
Rpp25l	390.484	0.314874	0.0861793	3.65371	0.000258476	0.00241958
Tmem80	474.904	-0.466513	0.127698	-3.65325	0.000258943	0.00242115
Mapkbp1	3347.44	-0.273069	0.0747453	-3.65333	0.000258859	0.00242115
Ppa2	939.161	0.350634	0.0959991	3.65247	0.000259731	0.00242711
Ccdc81	23.6434	0.634877	0.173862	3.65162	0.000260593	0.00243376
Fli1	4.05178	-2.12057	0.581018	-3.64975	0.0002625	0.00245015
Blvrb	162.368	0.592679	0.162399	3.64952	0.00026273	0.00245088
Trps1	517.003	-0.425305	0.11655	-3.64911	0.000263152	0.00245341
Zmiz2	6770.76	-0.370891	0.101644	-3.64894	0.000263327	0.00245362
Cryz	479.996	0.854406	0.234193	3.64829	0.000263987	0.00245835
Dock10	335.334	-0.383567	0.105152	-3.64773	0.000264564	0.0024623
Hgsnat	1115.95	0.44379	0.121682	3.64714	0.000265175	0.00246657
Zfp869	620.941	0.232902	0.0638653	3.64677	0.000265553	0.00246866
Rnf6	1454.63	0.126638	0.0347338	3.64595	0.000266404	0.00247462
Rell2	1234.42	0.354376	0.0971996	3.64586	0.0002665	0.00247462
Rpl7	13695.5	0.304904	0.0836453	3.6452	0.000267181	0.00247952
Topbp1	909.821	-0.225408	0.0619004	-3.64147	0.000271091	0.00251401
Fry	5625.54	-0.2696	0.0740384	-3.64135	0.000271209	0.00251401
Ddhd1	1441.24	0.400924	0.110114	3.64098	0.000271599	0.00251618
Pappa	103.305	-0.786354	0.215988	-3.64073	0.00027187	0.00251725
Vars	2195.78	0.227451	0.062502	3.6391	0.000273591	0.00253173
Tatdn2	2587.82	-0.145902	0.0401072	-3.6378	0.000274972	0.00254306
Trpv2	780.29	0.317311	0.0872307	3.6376	0.000275186	0.00254358
Snx3	3506.1	-0.197101	0.0541888	3.63731	0.000275505	0.00254508
Styk1	155.638	-0.500117	0.137526	-3.63651	0.000276356	0.00255148
Dcbld1	344.396	0.275735	0.0758579	3.63488	0.000278106	0.00256032
Gfap	357.905	1.39774	0.384497	3.63525	0.000277715	0.00256032
Fibcd1	656.734	0.393739	0.108322	3.63489	0.000278097	0.00256032
Anxa5	464.289	0.301521	0.0829396	3.63542	0.000277523	0.00256032
Chpf2	682.597	-0.227248	0.0625185	-3.63489	0.000278098	0.00256032
Luc7l	4476.37	0.111828	0.0307672	3.63465	0.000278355	0.00256115
Atf2	3423.47	-0.279172	0.0768186	-3.63418	0.000278867	0.00256441
Cope	2613.65	0.225864	0.0621553	3.63386	0.000279211	0.00256611
Golm2	6068.59	0.147558	0.040609	3.63362	0.000279467	0.002567
Tmem151a	2659.36	-0.368992	0.101571	-3.63285	0.000280309	0.00257327
Atp5a1	32189.2	0.277843	0.0764978	3.63204	0.000281187	0.00257986
Uck1	1376.05	-0.239814	0.0660365	-3.63154	0.000281732	0.0025834
Rab3d	2324.16	0.460082	0.126711	3.63096	0.000282366	0.00258677
D430019H16Rik	10053.2	-0.223283	0.061495	-3.63091	0.00028242	0.00258677
Gm13689	4.47456	-1.25901	0.346766	-3.63071	0.000282643	0.00258734
Casp9	1040.54	-0.370287	0.102007	-3.63003	0.000283386	0.00259268
Tmem147	2338.07	0.219699	0.0605307	3.62955	0.000283916	0.00259605
Sostdc1	115.184	-0.51302	0.141355	-3.62931	0.000284181	0.00259701
Atl1	3819.94	-0.238284	0.0656606	-3.62903	0.000284493	0.00259839
Rcbtb1	1252.55	-0.284132	0.0783218	-3.62775	0.000285901	0.00260978
Pcdhga4	299.177	-0.426202	0.117547	-3.62581	0.000288062	0.00262802
St3gal1	1249.56	-0.460146	0.126947	-3.6247	0.000289292	0.00263775
Proser2	34.6435	0.750578	0.207122	3.62384	0.000290261	0.00264509
Gm26628	16.7632	-0.669444	0.184754	-3.62343	0.000290718	0.00264776
Ndufb5	3140.37	0.28101	0.077558	3.62322	0.000290958	0.00264845
Glrx3	4907.25	0.306913	0.0847752	3.62031	0.000294248	0.0026769
Acvr1	1321.94	-0.316925	0.0875472	-3.62004	0.000294554	0.00267817
Scaper	2114.88	0.141804	0.0391844	3.6189	0.000295854	0.00268848
Borcs6	571.421	0.197142	0.054478	3.61874	0.000296043	0.00268869
Zc3h18	1266.28	-0.219389	0.0606404	-3.61787	0.000297041	0.00269492
Fdxacb1	118.412	-0.289661	0.0800645	-3.61785	0.000297064	0.00269492
Rnf113a1	341.551	0.247506	0.068451	3.61581	0.000299411	0.00271317
Fam161a	81.0951	0.342233	0.0946488	3.61582	0.000299401	0.00271317
Ddost	4110.3	0.122553	0.0339098	3.61408	0.00030142	0.00272985
Nvl	1645.08	-0.167376	0.0463216	-3.61335	0.00030227	0.00273601
Sh3gl2	6290.68	-0.174105	0.0481858	-3.61319	0.000302449	0.0027361
Smarcc2	8297.24	0.267523	0.0740647	3.61202	0.000303827	0.00274702
Trpc1	1443.76	-0.197276	0.0546221	-3.61166	0.000304246	0.00274917
Kcnma1	3264.56	-0.271033	0.0750467	-3.61152	0.000304405	0.00274917
Tgfb2	317.936	-0.538726	0.149207	-3.61058	0.000305507	0.00275759
Micos13	1903.13	0.301112	0.0834006	3.61043	0.000305689	0.00275769
Htr2a	288.045	-0.541131	0.149961	-3.60847	0.000308003	0.00277701
Nr2c2	2622.6	-0.19612	0.054355	-3.60812	0.000308419	0.00277921
Nsa2	1703.96	0.309434	0.085781	3.60725	0.000309459	0.00278703
Hspb11	377.565	0.362422	0.100493	3.60643	0.000310436	0.00279427
Gm10288	100.74	0.356327	0.0988162	3.60595	0.000311009	0.00279787
Rpl10a-ps1	240.708	0.320542	0.0889031	3.60552	0.000311526	0.00280096
Rusc2	7331.65	-0.189744	0.0526318	-3.60512	0.000312003	0.00280369
Tmem229b	4123.3	-0.12568	0.0348707	-3.60417	0.000313148	0.00281242
Col12a1	120.909	-0.394262	0.109405	-3.60371	0.000313711	0.00281591
Syde1	59.3437	0.697518	0.193565	3.60354	0.00031391	0.00281612
Cdk8	1299.14	0.17092	0.0474384	3.60298	0.000314592	0.00282068
Heatr6	922.912	-0.169417	0.0470291	-3.60239	0.00031531	0.0028216
Def6	73.4633	-0.846558	0.234998	-3.60241	0.000315285	0.0028216
Sox4	3229.3	-0.376386	0.10448	-3.60247	0.000315206	0.0028216
Rnf223	28.1408	-0.471201	0.130805	-3.60232	0.000315393	0.0028216
Sepsecs	635.275	-0.195948	0.05442	-3.60067	0.000317403	0.002838
Tmed4	1618.61	0.271522	0.0754291	3.5997	0.000318586	0.00284701
Pamr1	103.175	-0.469968	0.130568	-3.5994	0.000318951	0.0028478
Slc22a21	129.193	0.400658	0.111314	3.59934	0.000319026	0.0028478
Atrnl1	5473.09	-0.365771	0.101665	-3.59779	0.000320928	0.00286319
Fggy	170.618	0.42565	0.118317	3.59756	0.000321222	0.00286423
Ahnak	39.7462	-0.732444	0.203608	-3.59733	0.0003215	0.00286513
Wbp1l	1743.9	-0.362342	0.100729	-3.59718	0.000321685	0.0028652
Pcdh10	6474.37	0.359447	0.0999388	3.59667	0.000322311	0.00286919
Prex1	1557.21	-0.524895	0.146014	-3.59483	0.0003246	0.00288797
Akr1b10	119.171	0.355528	0.0989218	3.59403	0.000325597	0.00289525
Ndufb6	1740.93	0.247567	0.0689057	3.59284	0.000327097	0.00290699
Dmtn	6700.71	-0.347027	0.0966276	-3.59139	0.000328919	0.00292158
Chrm5	30.9451	-0.76704	0.213592	-3.59115	0.000329228	0.00292271
Tax1bp3	241.043	-0.412863	0.114976	-3.59086	0.000329592	0.00292434
Mtrf1	293.784	-0.339	0.0944162	3.59048	0.000330068	0.00292537
Pusl1	574.374	0.2058	0.0573183	3.59048	0.00033007	0.00292537
Dusp19	449.819	-0.197329	0.0549792	3.58915	0.000331752	0.00293705
Smarca5	2269.68	0.257708	0.0717993	3.58928	0.000331594	0.00293705
Cdh3	6.11655	-1.12496	0.313459	-3.58885	0.000332136	0.00293884
Zfp493	236.249	-0.379598	0.105811	3.58751	0.000333848	0.00295237
Nfkbil1	199.917	0.3257	0.090806	3.58676	0.000334807	0.00295923
Bcl9	2029.18	-0.359246	0.100164	-3.58657	0.000335059	0.00295984
Adra2a	430.281	-0.344553	0.0960822	-3.58602	0.000335758	0.00296439
Mdc1	1341.7	-0.211192	0.0589055	-3.58527	0.000336728	0.00297133
Dglucy	206.553	-0.474384	0.132337	3.58468	0.00033749	0.00297643
Boc	542.08	-0.379204	0.105805	-3.58401	0.000338362	0.00298087
Copz1	4394.54	0.16701	0.0465969	3.58414	0.000338193	0.00298087
Tmem219	292.119	0.221041	0.0616894	3.58313	0.000339508	0.00298933
Phkg1	52.6798	0.449429	0.125448	3.58258	0.000340218	0.00299395
Zdhhc8	1827.73	-0.422247	0.117893	-3.58162	0.000341467	0.00300331
Mgat3	5630.61	0.20486	0.0572022	3.58133	0.000341851	0.00300505
Klf9	1129.16	0.566307	0.158143	3.58098	0.000342309	0.00300744
Tmco6	356.044	0.266605	0.0744642	3.58031	0.000343187	0.00301352
Yars2	612.506	0.211265	0.0590149	3.57986	0.000343776	0.00301605
Pogz	2191.04	-0.175035	0.0488951	-3.57981	0.000343849	0.00301605
Metap2	3351.56	0.211483	0.0590987	3.57846	0.000345622	0.00302996
Smim14	3484.4	-0.224495	0.0627591	-3.57709	0.000347437	0.00304422
Hivep3	1512.4	-0.445945	0.124678	-3.57679	0.000347844	0.00304613
Rpl10	7383.6	0.399709	0.111788	3.57558	0.000349449	0.00305763
Zfp651	4934.69	-0.191266	0.0534932	-3.57552	0.000349536	0.00305763
Col14a1	112.265	-0.477015	0.133435	-3.57489	0.00035038	0.00306336
Cdkl5	8675.26	-0.447157	0.125144	-3.57314	0.000352721	0.00308216
Nqo1	27.2221	-0.697227	0.195168	-3.57245	0.000353662	0.00308704
Snx5	1595.46	-0.510474	0.14289	3.57251	0.000353579	0.00308704
Vipr2	38.0158	-0.524123	0.146785	-3.57067	0.000356069	0.00309635
Ccdc127	2112.78	-0.197125	0.055204	-3.57084	0.000355839	0.00309635
Atl3	1143.25	0.575599	0.161183	3.5711	0.000355486	0.00309635
Arl2	1427.63	0.229876	0.0643723	3.57104	0.00035556	0.00309635
Dnajb2	2616.57	0.282051	0.0789787	3.57123	0.000355312	0.00309635
Smpd3	7590.83	-0.356365	0.0997919	-3.57108	0.000355511	0.00309635
H2-D1	2177.23	0.410711	0.115022	3.57072	0.000355999	0.00309635
Zbtb14	670.487	-0.208912	0.0585115	-3.57044	0.000356386	0.00309743
Mtch1	13603.9	0.195767	0.0548393	3.56983	0.000357211	0.00310293
Man1a	768.486	-0.422082	0.118241	-3.56968	0.000357412	0.00310301
Raf1	2693.45	-0.154221	0.0432143	-3.56874	0.000358708	0.00311259
Kcnd3os	15.7133	-0.828073	0.232051	-3.5685	0.000359037	0.00311377
Fau	5007.54	0.281856	0.0790044	3.5676	0.000360273	0.00312231
Cdh20	506.865	-0.575056	0.161193	-3.5675	0.000360408	0.00312231
Nol8	1022.77	0.178952	0.0501651	3.56726	0.00036073	0.00312343
Ccdc28a	178.945	-0.500797	0.140476	-3.565	0.000363858	0.00314714
Fcor	123.792	0.433458	0.121584	3.5651	0.000363717	0.00314714
Scaf4	1013.96	-0.189333	0.0531334	-3.56335	0.000366152	0.00316529
Smarce1	2915.46	0.159387	0.0447393	3.56257	0.00036724	0.003173
Shank3	5069.51	-0.324441	0.0910759	-3.56231	0.000367609	0.00317448
Mepce	1153.05	-0.186888	0.0524721	-3.56166	0.000368512	0.00318058
Ccser2	4506.95	-0.275465	0.0773482	-3.56137	0.000368932	0.0031825
Nr2c1	313.254	-0.236052	0.0662955	-3.56061	0.000369994	0.00318691
Id3	94.008	-1.0469	0.294024	-3.56058	0.000370034	0.00318691
Rpl35a	3406.16	0.263592	0.0740254	3.56083	0.000369691	0.00318691
Cenpn	24.092	0.592731	0.166478	3.56042	0.000370262	0.00318717
Zfp628	306.406	-0.385591	0.108328	-3.55947	0.000371601	0.003197
Slc35c2	1434.1	0.297651	0.083644	3.55854	0.000372917	0.00320661
Atp6v0a2	1029.56	-0.167776	0.0471611	-3.5575	0.000374401	0.00321766
Pigu	1204.71	0.19683	0.0553336	3.55716	0.000374887	0.00322012
Eif1ax	7275.49	0.288687	0.0811895	3.55572	0.00037694	0.00323604
Ncaph2	4007.8	0.174795	0.0491669	3.55514	0.000377778	0.00324151
Lzts2	789.874	-0.273247	0.0768713	-3.5546	0.000378556	0.00324646
Birc6	7041.52	-0.241212	0.0678654	-3.55427	0.00037903	0.0032488
Mbnl2	1512.38	-0.344725	0.0970122	-3.55342	0.000380259	0.00325416
Klhdc10	7836.73	-0.23487	0.066096	-3.55348	0.000380177	0.00325416
Svop	5443.84	0.418224	0.117694	3.55349	0.000380151	0.00325416
Mvb12a	503.492	0.272264	0.0766678	3.55122	0.000383445	0.00327968
Dctn1	12744.9	-0.196995	0.0554791	-3.5508	0.000384067	0.00328327
Cntn1	19222.7	-0.32179	0.0906415	-3.55014	0.000385025	0.00328971
Ppp1r2	2415.93	-0.318965	0.0898499	-3.54998	0.000385264	0.00329002
Rpl17	7755.44	0.274035	0.0771973	3.5498	0.000385518	0.00329044
Rdm1	48.645	0.606837	0.170964	3.54951	0.000385949	0.00329238
Ecd	1332.68	-0.221911	0.0625353	-3.54857	0.000387326	0.00330239
Fis1	2624.37	0.167661	0.0472547	3.54802	0.000388142	0.00330612
Anxa2	273.792	0.443946	0.125126	3.548	0.000388173	0.00330612
Nt5c2	1977.24	-0.131156	0.0369708	-3.54755	0.000388827	0.00330912
Phyh	466.614	0.510202	0.143821	3.54748	0.000388935	0.00330912
Cyp1b1	42.2796	-0.644178	0.181611	-3.54703	0.000389601	0.00331305
Hspbp1	4319.46	0.24838	0.0700294	3.54679	0.000389959	0.00331435
Chrnb2	2971.16	-0.18742	0.0528717	-3.54481	0.000392901	0.00333759
Eif3k	3072.35	0.151731	0.0428066	3.54457	0.000393247	0.00333878
Myl4	69.645	-0.968079	0.273154	-3.54407	0.000393996	0.00334338
Ccdc71l	738.564	-0.365762	0.103224	-3.54337	0.00039505	0.00335056
Lrrc49	2338.92	-0.282793	0.07982	-3.54289	0.000395774	0.00335494
Smyd5	1829.99	0.373237	0.105357	3.54259	0.000396217	0.00335694
Ednrb	624.569	-0.501356	0.141544	-3.54206	0.000397015	0.00336017
Retreg1	2428.64	-0.353024	0.0996648	-3.54212	0.000396931	0.00336017
Krt12	64.836	-0.562564	0.158888	-3.54063	0.000399178	0.00337495
Mrps35	930.358	0.245161	0.0692398	3.54075	0.000398997	0.00337495
Mdk	159.553	0.552885	0.156184	3.53995	0.000400202	0.00338183
Lrpprc	3623.07	0.136071	0.0384736	3.53675	0.000405089	0.00341955
Rxylt1	1357.94	0.197367	0.0558041	3.53678	0.000405034	0.00341955
St6gal1	588.729	-0.353944	0.10011	-3.53556	0.000406906	0.0034331
Sfxn4	262.97	0.344992	0.0976357	3.53347	0.00041015	0.00345866
Plek	147.837	0.307523	0.0870691	3.53194	0.000412521	0.00347684
Cpm	104.691	0.420372	0.119071	3.53043	0.000414881	0.00349309
Tent2	532.014	-0.170924	0.048413	-3.53053	0.000414721	0.00349309
Stk4	1962.51	-0.327829	0.0928756	-3.52977	0.000415925	0.00350005
Gm5441	28.5574	-0.580026	0.16441	-3.52793	0.000418826	0.00352263
Kif22	83.1006	-0.430243	0.121979	-3.5272	0.000419979	0.00353049
Rbm34	831.755	0.211486	0.0599803	3.52593	0.000422004	0.00354566
Mapk10	7254.04	-0.110261	0.0312776	-3.52523	0.000423108	0.0035531
Gm45623	20.1144	-0.807517	0.229122	-3.5244	0.000424447	0.00356248
Polr3c	789.463	0.209731	0.0595217	3.52361	0.000425715	0.00357127
Tada2b	997.003	-0.229781	0.0652149	-3.52344	0.000425977	0.00357162
Csnk1g1	2123.12	-0.240951	0.0684072	-3.52231	0.000427804	0.00358508
Polr2h	925.152	0.309817	0.0879633	3.52212	0.000428118	0.00358585
Cdr2	771.911	0.382995	0.108752	3.52173	0.000428735	0.00358915
Pkp2	80.3738	0.447237	0.127008	3.52134	0.000429377	0.00359081
Pcdhb19	586.657	-0.322877	0.0916894	-3.52143	0.000429233	0.00359081
Cit	810.266	-0.496522	0.141013	-3.52111	0.000429744	0.00359202
Haus7	688.867	0.211208	0.0599881	3.52083	0.000430201	0.00359212
Adk	834.911	-0.386074	0.109652	3.5209	0.000430087	0.00359212
Ghitm	11485.7	0.309297	0.0878545	3.52056	0.000430634	0.00359388
Pmf1	79.1314	0.465515	0.132281	3.51914	0.000432946	0.00361131
Ube4a	3834.62	-0.26349	0.0748861	-3.51855	0.000433912	0.00361601
Btbd19	107.52	-0.460078	0.130759	-3.51852	0.000433957	0.00361601
Mrpl16	936.045	-0.200387	0.0569719	3.5173	0.000435966	0.00362978
Eif3m	3184.82	0.296865	0.0844029	3.51724	0.000436059	0.00362978
Hspe1	2441.53	0.2384	0.0678011	3.51617	0.000437824	0.0036426
Rsl24d1	987.363	-0.235958	0.0671157	-3.51568	0.000438622	0.00364736
Gm14399	116.576	0.462315	0.131579	3.51359	0.0004421	0.00367438
Crispld2	77.3247	-0.536402	0.15269	-3.51301	0.000443069	0.00368055
Neurl2	65.7847	-0.398202	0.113361	3.5127	0.000443573	0.00368284
Sybu	5688.28	-0.276213	0.0786414	-3.51232	0.000444217	0.0036863
Syt16	2711.83	-0.318081	0.0905705	-3.51197	0.000444803	0.00368927
Mkrn1	6547.46	-0.106666	0.0303768	-3.51142	0.000445712	0.0036949
Tet1	1548.27	0.31812	0.0906093	3.5109	0.000446592	0.0037003
Col6a1	803.969	-0.291719	0.0831225	-3.50951	0.000448939	0.00371446
Rexo2	1312.71	-0.428896	0.122208	3.50955	0.000448869	0.00371446
Zfp868	785.801	-0.260473	0.0742199	3.50948	0.00044899	0.00371446
Phyhd1	55.3211	-0.464511	0.132376	-3.50904	0.000449734	0.0037187
Snx31	46.6127	0.528899	0.150731	3.50889	0.000449977	0.00371881
Ndufs6	1862.48	0.291642	0.083136	3.50801	0.000451468	0.00372905
Clcc1	655.813	0.213088	0.0607455	3.50789	0.000451677	0.00372905
Ipo8	1368.26	-0.279227	0.0796065	-3.50759	0.000452188	0.00373136
Ptprd	8752.68	-0.19956	0.0568984	-3.5073	0.00045268	0.00373351
Gdf11	1336.61	-0.345549	0.0985742	3.50547	0.000455799	0.00375732
Bsn	8781.73	-0.312788	0.089248	-3.50471	0.000457108	0.00376235
Atp11b	5849.77	-0.261425	0.074587	-3.50497	0.000456661	0.00376235
Fjx1	2513.42	-0.383122	0.109316	-3.50472	0.000457088	0.00376235
Zfp30	601.934	0.21754	0.0620975	3.5032	0.000459701	0.00377984
Znhit1	1441.9	0.303026	0.0864989	3.50324	0.000459633	0.00377984
Sucla2	5614.72	0.257217	0.0734659	3.50117	0.000463215	0.0038068
Ccp110	1331.34	-0.310895	0.0888927	-3.49742	0.000469786	0.00385884
Sez6	4350.32	-0.308269	0.0881667	-3.49643	0.000471524	0.00387114
Adcy5	5725.77	-0.232281	0.0664422	-3.49599	0.000472303	0.00387557
Lrrc51	215.896	0.330113	0.0944415	3.49542	0.00047332	0.00388195
Stx1a	6522.27	-0.307935	0.0881297	-3.49411	0.000475637	0.00389699
9130023H24Rik	136.088	-0.440868	0.126171	-3.49421	0.000475465	0.00389699
Ttc30b	559.458	-0.22595	0.064679	-3.49341	0.0004769	0.00390536
Tmem74b	424.922	0.229087	0.0656066	3.49183	0.000479725	0.00392651
Pcsk4	148.385	0.417675	0.119704	3.48924	0.0004844	0.00395792
Becn1	1689.3	-0.190914	0.0547149	-3.48925	0.000484383	0.00395792
Pcsk7	741.248	-0.197259	0.0565349	-3.48916	0.000484544	0.00395792
Tubg2	902.359	0.212328	0.0608467	3.48956	0.000483813	0.00395792
Scara5	15.6962	-0.993855	0.284928	-3.48809	0.000486485	0.00397177
Kcne1l	55.0123	-0.849	0.243423	-3.48775	0.000487104	0.00397481
Slc16a7	3832.49	-0.291288	0.0835292	-3.48726	0.000488005	0.00397815
Fat3	4703.43	-0.384889	0.110368	-3.48734	0.000487851	0.00397815
Fbxl8	37.2784	0.587609	0.168511	3.48707	0.000488345	0.00397891
Ndrg3	11890.6	-0.142451	0.0408642	-3.48595	0.000490385	0.00399352
Prelid3a	1174.26	0.160072	0.0459209	3.48582	0.000490638	0.00399357
Hcfc1r1	2483.04	0.177762	0.0510049	3.48519	0.000491781	0.00399901
Plch2	1782.94	-0.2306	0.0661658	-3.48518	0.000491801	0.00399901
Coq9	1792.39	0.42362	0.121562	3.48481	0.00049249	0.0040026
Rxfp3	139.369	-0.732939	0.21041	-3.48339	0.000495112	0.00402189
Prcp	383.399	0.25784	0.0740308	3.48287	0.000496065	0.0040276
Snx12	1529.77	-0.217512	0.0624632	-3.48224	0.000497242	0.00403513
Actn1	1496.95	-0.16529	0.0474783	-3.48137	0.000498848	0.00404613
Gab1	327.457	-0.521937	0.14995	-3.48075	0.000500017	0.00405358
Trmt5	320.924	-0.217507	0.0625023	3.47998	0.00050145	0.00406315
Slc26a11	117.171	0.482816	0.13875	3.47975	0.000501876	0.00406457
Tcf7	17.3425	-0.607547	0.17463	-3.47906	0.000503185	0.00407312
Tspan12	468.978	0.313083	0.0900103	3.4783	0.000504597	0.00407435
Lrfn2	893.578	-0.259233	0.0745199	-3.4787	0.000503849	0.00407435
Fbxw4	366.673	0.148568	0.0427125	3.47834	0.000504536	0.00407435
[truncated: 28,085 more rows]

## Sheet: Set1_up_GO
query	significant	p_value	term_size	query_size	intersection_size	precision	recall	term_id	source	term_name	effective_domain_size	source_order	parents	evidence_codes	intersection	highlighted	nlog10_pval
query_1	TRUE	3.30455e-06	242	126	18	0.142857	0.0743802	GO:0044282	GO:BP	small molecule catabolic process	11991	10851	c(\GO:0009056\", \"GO:0044281\")"	IEA,IDA IMP,IEA,ISS ISO IBA IEA,IEA,ISS IBA TAS IEA,IMP ISS ISO IBA IEA,IGI IBA,IMP IC,IDA,IMP ISS ISO IBA IEA,IBA,ISS ISO IBA IEA,IGI,ISS,IBA,IDA IBA IEA,IMP	Acad8,Ldha,Crot,Etfa,Gk5,Npl,Hacl1,Tpi1,Galk1,Nudt7,Acadm,Gls2,Hadh,Pgk1,Eno1b,Qdpr,Upp1,Slc16a3	TRUE	12.6202
query_1	TRUE	8.24316e-06	570	126	26	0.206349	0.045614	GO:0019752	GO:BP	carboxylic acid metabolic process	11991	6004	GO:0043436	IDA IMP IGI ISO IBA IEA,IEA,IEA,IDA IMP ISO IBA IC IEA,IDA IEA,ISO ISA IEA,ISS ISO IBA IEA,ISS IBA TAS IEA,IMP ISS ISO IBA IEA,IMP,IGI IBA IC IEA,IMP IC,ISO IEA,IBA IEA,IDA,IMP ISS ISO IBA IEA,IBA IEA,ISS ISO IBA IEA,IMP ISS ISO IBA IEA,IDA IGI IBA IEA,IMP,IBA IEA,ISS IBA IEA,IBA,ISO IEA,IMP	Scd1,Plod2,Acad8,Ldha,Crot,Mdh2,Etfa,Npl,Hacl1,Ero1a,Tpi1,Galk1,Grhpr,Hk2,Nudt7,Acadm,Gls2,Hadh,Asl,Pgk1,Ddit4,Aldoc,Eno1b,Qdpr,Ghsr,Slc16a3	FALSE	11.7061
query_1	TRUE	1.07526e-05	577	126	26	0.206349	0.0450607	GO:0043436	GO:BP	oxoacid metabolic process	11991	10596	GO:0006082	IDA IMP IGI ISO IBA IEA,IEA,IEA,IDA IMP ISO IBA IC IEA,IDA IEA,ISO ISA IEA,ISS ISO IBA IEA,ISS IBA TAS IEA,IMP ISS ISO IBA IEA,IMP,IGI IBA IC IEA,IMP IC,ISO IEA,IBA IEA,IDA,IMP ISS ISO IBA IEA,IBA IEA,ISS ISO IBA IEA,IMP ISS ISO IBA IEA,IDA IGI IBA IEA,IMP,IBA IEA,ISS IBA IEA,IBA,ISO IEA,IMP	Scd1,Plod2,Acad8,Ldha,Crot,Mdh2,Etfa,Npl,Hacl1,Ero1a,Tpi1,Galk1,Grhpr,Hk2,Nudt7,Acadm,Gls2,Hadh,Asl,Pgk1,Ddit4,Aldoc,Eno1b,Qdpr,Ghsr,Slc16a3	FALSE	11.4404
query_1	TRUE	1.15922e-05	579	126	26	0.206349	0.044905	GO:0006082	GO:BP	organic acid metabolic process	11991	1943	GO:0044281	IDA IMP IGI ISO IBA IEA,IEA,IEA,IDA IMP ISO IBA IC IEA,IDA IEA,ISO ISA IEA,ISS ISO IBA IEA,ISS IBA TAS IEA,IMP ISS ISO IBA IEA,IMP,IGI IBA IC IEA,IMP IC,ISO IEA,IBA IEA,IDA,IMP ISS ISO IBA IEA,IBA IEA,ISS ISO IBA IEA,IMP ISS ISO IBA IEA,IDA IGI IBA IEA,IMP,IBA IEA,ISS IBA IEA,IBA,ISO IEA,IMP	Scd1,Plod2,Acad8,Ldha,Crot,Mdh2,Etfa,Npl,Hacl1,Ero1a,Tpi1,Galk1,Grhpr,Hk2,Nudt7,Acadm,Gls2,Hadh,Asl,Pgk1,Ddit4,Aldoc,Eno1b,Qdpr,Ghsr,Slc16a3	FALSE	11.3652
query_1	TRUE	2.11906e-05	29	126	8	0.0634921	0.275862	GO:0048002	GO:BP	antigen processing and presentation of peptide antigen	11991	12293	GO:0019882	IDA IBA IEA,IBA,IBA,IDA IBA IEA,IDA IBA IEA,IBA IEA,IDA IBA,IBA IEA	H2-K1,H2-T22,H2-T9,H2-T23,H2-Ab1,H2-Q2,H2-M3,H2-Q7	FALSE	10.762
query_1	TRUE	0.000338302	1170	126	35	0.277778	0.0299145	GO:0044281	GO:BP	small molecule metabolic process	11991	10850	GO:0008152	IDA IMP IGI ISO IBA IEA,IEA,IEA,IEA,IDA IMP ISO IBA IC IEA,IDA IEA,IDA ISO IBA IEA,IDA ISO ISA IEA,ISS ISO IBA IEA,IBA IEA,ISS IBA TAS IEA,IMP ISS ISO IBA IEA,IEA,IMP,IDA IGI ISS IBA IC IEA,IDA IMP ISO IBA IC IEA,ISO IEA,IMP IBA IEA,IDA IBA IEA,IMP ISS ISO IBA IEA,IBA IEA,ISS ISO IBA IEA,IMP ISS ISO IBA IEA,IDA IGI IBA IEA,IMP,IDA IBA IEA,IMP ISS IBA IEA,ISS ISO IBA IEA,ISS IBA IEA,ISS ISO IBA IE…	Scd1,Plod2,Acad8,Ahcyl2,Ldha,Crot,Soat1,Mdh2,Etfa,Gk5,Npl,Hacl1,Rhoq,Ero1a,Tpi1,Galk1,Grhpr,Hk2,Nudt7,Acadm,Gls2,Hadh,Asl,Pgk1,Ddit4,Aldoc,Eno1b,Dnph1,Ak4,Qdpr,Upp1,Ghsr,Pfkfb3,Plpp2,Slc16a3	FALSE	7.99157
query_1	TRUE	0.000859357	63	126	9	0.0714286	0.142857	GO:0002824	GO:BP	positive regulation of adaptive immune response based on somatic recombination of immune receptors built from immunoglobulin superfamily domains	11991	1332	c(\GO:0002460\", \"GO:0002821\", \"GO:0002822\")"	ISS IEA,IDA IBA,IBA,IBA,IDA IBA,IDA,IBA,IDA IMP IBA,IBA	Tfrc,H2-K1,H2-T22,H2-T9,H2-T23,H2-Ab1,H2-Q2,H2-M3,H2-Q7	FALSE	7.05933
query_1	TRUE	0.00139807	395	126	19	0.150794	0.0481013	GO:0032787	GO:BP	monocarboxylic acid metabolic process	11991	7765	GO:0019752	IDA IMP IGI ISO IBA IEA,IEA,IDA IMP ISO IBA IC IEA,IDA IEA,ISS ISO IBA IEA,IMP ISS ISO IBA IEA,IGI IBA IC IEA,IMP IC,IEA,IBA IEA,IDA,IMP ISS ISO IBA IEA,ISS ISO IBA IEA,IDA IGI IBA IEA,IMP,IBA IEA,ISS IBA IEA,ISO IEA,IMP	Scd1,Acad8,Ldha,Crot,Etfa,Hacl1,Tpi1,Galk1,Grhpr,Hk2,Nudt7,Acadm,Hadh,Pgk1,Ddit4,Aldoc,Eno1b,Ghsr,Slc16a3	FALSE	6.57266
query_1	TRUE	0.00149869	67	126	9	0.0714286	0.134328	GO:0002821	GO:BP	positive regulation of adaptive immune response	11991	1329	c(\GO:0002250\", \"GO:0002819\", \"GO:0050778\")"	ISS IEA,IDA IBA,IBA,IBA,IDA IBA,IDA,IBA,IDA IMP IBA,IBA	Tfrc,H2-K1,H2-T22,H2-T9,H2-T23,H2-Ab1,H2-Q2,H2-M3,H2-Q7	FALSE	6.50316
query_1	TRUE	0.00553292	56	126	8	0.0634921	0.142857	GO:0002708	GO:BP	positive regulation of lymphocyte mediated immunity	11991	1224	c(\GO:0002449\", \"GO:0002705\", \"GO:0002706\")"	ISS IEA,IDA IBA,IBA,IBA,IDA IBA,IBA,IDA IMP IBA,IBA	Tfrc,H2-K1,H2-T22,H2-T9,H2-T23,H2-Q2,H2-M3,H2-Q7	FALSE	5.19704
query_1	TRUE	0.00733618	58	126	8	0.0634921	0.137931	GO:0019882	GO:BP	antigen processing and presentation	11991	6028	GO:0002376	IDA IBA IEA,IBA,IBA,IDA IBA IEA,IDA IBA IEA,IBA IEA,IDA IBA,IBA IEA	H2-K1,H2-T22,H2-T9,H2-T23,H2-Ab1,H2-Q2,H2-M3,H2-Q7	FALSE	4.91494
query_1	TRUE	0.0100673	169	126	12	0.0952381	0.0710059	GO:0016054	GO:BP	organic acid catabolic process	11991	5062	c(\GO:0006082\", \"GO:0044282\")"	IEA,IDA IMP,IEA,ISS ISO IBA IEA,ISS IBA TAS IEA,IMP ISS ISO IBA IEA,IDA,IMP ISS ISO IBA IEA,IBA,ISS ISO IBA IEA,IBA,IMP	Acad8,Ldha,Crot,Etfa,Npl,Hacl1,Nudt7,Acadm,Gls2,Hadh,Qdpr,Slc16a3	FALSE	4.59847
query_1	TRUE	0.0100673	169	126	12	0.0952381	0.0710059	GO:0046395	GO:BP	carboxylic acid catabolic process	11991	11957	c(\GO:0016054\", \"GO:0019752\")"	IEA,IDA IMP,IEA,ISS ISO IBA IEA,ISS IBA TAS IEA,IMP ISS ISO IBA IEA,IDA,IMP ISS ISO IBA IEA,IBA,ISS ISO IBA IEA,IBA,IMP	Acad8,Ldha,Crot,Etfa,Npl,Hacl1,Nudt7,Acadm,Gls2,Hadh,Qdpr,Slc16a3	FALSE	4.59847
query_1	TRUE	0.0160717	64	126	8	0.0634921	0.125	GO:0002705	GO:BP	positive regulation of leukocyte mediated immunity	11991	1221	c(\GO:0002443\", \"GO:0002699\", \"GO:0002703\")"	ISS IEA,IDA IBA,IBA,IBA,IDA IBA,IBA,IDA IMP IBA,IBA	Tfrc,H2-K1,H2-T22,H2-T9,H2-T23,H2-Q2,H2-M3,H2-Q7	FALSE	4.1307
query_1	TRUE	0.038453	97	126	9	0.0714286	0.0927835	GO:0002822	GO:BP	regulation of adaptive immune response based on somatic recombination of immune receptors built from immunoglobulin superfamily domains	11991	1330	c(\GO:0002460\", \"GO:0002819\")"	ISS IEA,IDA IBA,IBA,IBA,IDA IBA,IDA,IBA,IDA IMP IBA,IBA	Tfrc,H2-K1,H2-T22,H2-T9,H2-T23,H2-Ab1,H2-Q2,H2-M3,H2-Q7	FALSE	3.25832
query_1	TRUE	0.04197	98	126	9	0.0714286	0.0918367	GO:0072329	GO:BP	monocarboxylic acid catabolic process	11991	17118	c(\GO:0032787\", \"GO:0046395\")"	IEA,IDA IMP,IEA,ISS ISO IBA IEA,IMP ISS ISO IBA IEA,IDA,IMP ISS ISO IBA IEA,ISS ISO IBA IEA,IMP	Acad8,Ldha,Crot,Etfa,Hacl1,Nudt7,Acadm,Hadh,Slc16a3	FALSE	3.1708
query_1	TRUE	1.06704e-05	10	125	6	0.048	0.6	GO:0042611	GO:CC	MHC protein complex	12150	1773	GO:0098797	IEA,IEA,IDA IBA IEA,IEA,IDA,IEA	H2-K1,H2-T23,H2-Ab1,H2-Q2,H2-M3,H2-Q7	TRUE	11.448
query_1	TRUE	0.0182441	7	125	4	0.032	0.571429	GO:0042612	GO:CC	MHC class I protein complex	12150	1774	GO:0042611	IEA,IEA,IEA,IEA	H2-K1,H2-T23,H2-Q2,H2-Q7	FALSE	4.00392
query_1	TRUE	1.39633e-07	17	127	8	0.0629921	0.470588	GO:0042605	GO:MF	peptide antigen binding	12019	5128	c(\GO:0003823\", \"GO:0042277\")"	IDA IBA,IBA,IBA,IBA,IDA IBA,IBA,IDA IMP IBA,IBA	H2-K1,H2-T22,H2-T9,H2-T23,H2-Ab1,H2-Q2,H2-M3,H2-Q7	TRUE	15.7842
query_1	TRUE	1.16728e-05	27	127	8	0.0629921	0.296296	GO:0003823	GO:MF	antigen binding	12019	355	GO:0005488	IDA IBA,IBA,IBA,IBA,IDA IPI IBA,IBA,IDA IMP IBA,IBA	H2-K1,H2-T22,H2-T9,H2-T23,H2-Ab1,H2-Q2,H2-M3,H2-Q7	FALSE	11.3583

## Sheet: Set2_up_GO
No results
