# Supplementary material for: Autism spectrum disorder–risk genes have convergent effects on transcription and neuronal firing patterns in primary neurons
Source: HighWire-hosted journal article supplement (doi:10.1101/gr.280698.125), 2025-10-20
Supplement: Supplemental_Table_S12.xlsx [file Supplemental_Table_S12.xlsx]

## Sheet: Legend
Supplemental Data Table 12. Antibodies and dilutions used.

## Sheet: Sheet1
	Supplemental Table 7. Antibodies
	Antibody	Supplier (Cat No.)	Working Dilution
	Rabbit anti DNMT3A	Abcam (ab188470)	1:1000
	Rabbit anti MBD5	Protein Tech (15961-1-AP)	1:1000
	Rabbit anti SETD5	ThermoFisher (PA596629)	1:1000
	Rabbit anti TBR1	Abcam (ab183032)	1:1000
	Rabbit anti GAPDH (14C10)	Cell Signalling (2118)	1:2500
	Rabbit anti Lamin B1	Abcam (ab16048)	1:2500
